# Supplementary material for: Systematic Assessment of the Catalytic Reactivity of Frustrated Lewis Pairs in C-H Bond Activation
Source: MDPI journal article supplement (doi:10.3390/molecules29010024), 2023-12-19
Supplement: s1 [file s1]

## Supporting Information

# Systematic Assessment of the Catalytic Reactivity of Frustrated Lewis Pairs on C-H Bond Activation

Yongjie Guo <sup>1,†</sup>, Xueqi Lian <sup>2,†</sup>, Hao Zhang <sup>1</sup>, Xueling Zhang <sup>2</sup>, Jun Chen <sup>1</sup>,  
Changzhong Chen <sup>1</sup>, Xiaobing Lan <sup>1,\*</sup> and Youxiang Shao <sup>2,\*</sup>

1 Hunan Provincial Key Laboratory of Xiangnan Rare-Precious Metals Compounds Research and Application, School of Chemistry and Environmental Science, Xiangnan University, Chenzhou 423000, China

2 School of Chemistry and Materials Engineering, Key Laboratory of Electronic Functional Materials and Devices of Guangdong Province, Huizhou University, Huizhou 516007, China

\* Correspondence: xblan@xnu.edu.cn; shaoyx@whu.edu.cn

† These authors contributed equally to this work.

## Table of Contents

|                                                                                                                                                 |     |
|-------------------------------------------------------------------------------------------------------------------------------------------------|-----|
| 1. Table S1. The detailed information of FLPs discussed in the manuscript.....                                                                  | 2   |
| 2. References.....                                                                                                                              | 6   |
| 3. Figure S1. The calculated free energies ( $\Delta_r G$ ) and the free energy barrier ( $\Delta G^\ddagger$ ) of the C-H bond activation..... | 11  |
| 4. Optimized coordinates of collected FLPs.....                                                                                                 | 11  |
| 5. Coordinates of intermediates and transition states involved in Figure 2 and Figure 3.....                                                    | 44  |
| 6. Coordinates of intermediates and transition states involved in Figure 4.....                                                                 | 117 |
| 7. Coordinates of intermediates and transition states involved in Figure 5.....                                                                 | 123 |

**Table S1. The detailed information of FLPs discussed in the manuscript.**

| number    | structure                                                                                                                                 | reference |
|-----------|-------------------------------------------------------------------------------------------------------------------------------------------|-----------|
| <b>N1</b> | 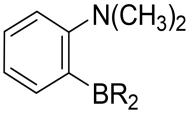                                                         | [1]       |
| <b>N2</b> | <p>R=2,4,6-Me<sub>3</sub>C<sub>6</sub>H<sub>2</sub></p>  | [1]       |
| <b>N3</b> | <p>R=2,4,5-Me<sub>3</sub>C<sub>6</sub>H<sub>2</sub></p>  | [2-3]     |
| <b>N4</b> |                                                          | [3]       |
| <b>N5</b> |                                                         | [2]       |
| <b>N6</b> |                                                        | [1]       |
| <b>N7</b> |                                                        | [4]       |
| <b>N8</b> |                                                        | [4]       |
| <b>N9</b> |                                                        | [4]       |

|            |                                                                                     |       |
|------------|-------------------------------------------------------------------------------------|-------|
| <b>N10</b> | 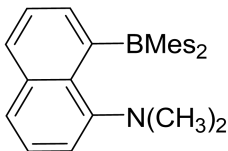   | [4]   |
| <b>N11</b> |    | [5]   |
| <b>N12</b> |    | [6]   |
| <b>N13</b> |    | [6]   |
| <b>N14</b> |   | [6]   |
| <b>N15</b> |  | [6]   |
| <b>N16</b> |  | [6]   |
| <b>N17</b> |  | [6]   |
| <b>N18</b> |  | [7-8] |

|            |                                                                                     |      |
|------------|-------------------------------------------------------------------------------------|------|
| <b>N19</b> | 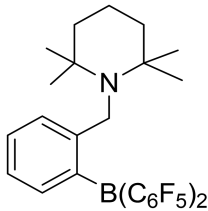   | [9]  |
| <b>N20</b> |    | [10] |
| <b>N21</b> |    | [10] |
| <b>P1</b>  |   | [11] |
| <b>P2</b>  |  | [12] |
| <b>P3</b>  |  | [13] |
| <b>P4</b>  |  | [14] |
| <b>P5</b>  |  | [15] |
| <b>P6</b>  |  | [16] |
| <b>P7</b>  |  | [17] |

|            |                                                                                     |      |
|------------|-------------------------------------------------------------------------------------|------|
| <b>P8</b>  | 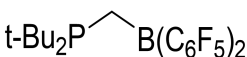   | [18] |
| <b>P9</b>  |    | [18] |
| <b>P10</b> |    | [19] |
| <b>P11</b> |    | [20] |
| <b>P12</b> |    | [21] |
| <b>P13</b> |    | [21] |
| <b>P14</b> |    | [21] |
| <b>P15</b> |    | [22] |
| <b>P16</b> |   | [23] |
| <b>P17</b> |  | [24] |
| <b>P18</b> |  | [24] |
| <b>P19</b> |  | [25] |
| <b>P20</b> |  | [26] |

|            |                                                                                    |          |
|------------|------------------------------------------------------------------------------------|----------|
| <b>P21</b> | 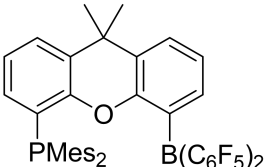  | [26]     |
| <b>P22</b> |   | [26]     |
| <b>P23</b> |   | [13]     |
| <b>P24</b> |   | [13, 27] |
| <b>P25</b> |  | [28]     |

## References

1. Chernichenko, K.; Kótai, B.; Pápai, I.; Zhivonitko, V.; Nieger, M.; Leskelä, M.; Repo, T., Intramolecular Frustrated Lewis Pair with the Smallest Boryl Site: Reversible H<sub>2</sub> Addition and Kinetic Analysis. *Angew. Chem., Int. Ed.* **2015**, *54*, 1749-1753.
2. Chernichenko, K.; Nieger, M.; Leskelä, M.; Repo, T., Hydrogen activation by 2-boryl-N,N-dialkylanilines: a revision of Piers' ansa-aminoborane. *Dalton Trans.* **2012**, *41*, 9029-9032.
3. Chernichenko, K.; Madarász, Á.; Pápai, I.; Nieger, M.; Leskelä, M.; Repo, T., A frustrated-Lewis-pair approach to catalytic reduction of alkynes to cis-alkenes. *Nat. Chem.* **2013**, *5*, 718-723.
4. Pla, D.; Sadek, O.; Cadet, S.; Mestre-Voegtlé, B.; Gras, E., Naphthylaminoborane: from structural switches to frustrated Lewis pair reactivity. *Dalton Trans.* **2015**, *44*, 18340-18346.

5. Xu, B.-H.; Bussmann, K.; Fröhlich, R.; Daniliuc, C. G.; Brandenburg, J. G.; Grimme, S.; Kehr, G.; Erker, G., An Enamine/HB(C<sub>6</sub>F<sub>5</sub>)<sub>2</sub> Adduct as a Dormant State in Frustrated Lewis Pair Chemistry. *Organometallics* **2013**, *32*, 6745-6752.
6. Schwendemann, S.; Fröhlich, R.; Kehr, G.; Erker, G., Intramolecular frustrated N/B lewis pairs by enamine hydroboration. *Chem. Sci.* **2011**, *2*, 1842-1849.
7. Schwendemann, S.; Oishi, S.; Saito, S.; Fröhlich, R.; Kehr, G.; Erker, G., Reaction of an “Invisible” Frustrated N/B Lewis Pair with Dihydrogen. *Chem. Asian J.* **2013**, *8*, 212-217.
8. Lindqvist, M.; Axenov, K.; Nieger, M.; Räisänen, M.; Leskelä, M.; Repo, T., Frustrated Lewis Pair Chemistry of Chiral (+)-Camphor-Based Aminoboranes. *Chem. Eur. J.* **2013**, *19*, 10412-10418.
9. Sumerin, V.; Schulz, F.; Atsumi, M.; Wang, C.; Nieger, M.; Leskelä, M.; Repo, T.; Pyykkö, P.; Rieger, B., Molecular Tweezers for Hydrogen: Synthesis, Characterization, and Reactivity. *J. Am. Chem. Soc.* **2008**, *130*, 14117-14119.
10. Sumerin, V.; Chernichenko, K.; Nieger, M.; Leskelä, M.; Rieger, B.; Repo, T., Highly Active Metal-Free Catalysts for Hydrogenation of Unsaturated Nitrogen-Containing Compounds. *Adv. Synth. Catal.* **2011**, *353*, 2093-2110.
11. Courtemanche, M.-A.; Légaré, M.-A.; Maron, L.; Fontaine, F.-G., A Highly Active Phosphine–Borane Organocatalyst for the Reduction of CO<sub>2</sub> to Methanol Using Hydroboranes. *J. Am. Chem. Soc.* **2013**, *135*, 9326-9329.
12. Porcel, S.; Bouhadir, G.; Saffon, N.; Maron, L.; Bourissou, D., Reaction of Singlet Dioxygen with Phosphine–Borane Derivatives: From Transient Phosphine Peroxides to Crystalline Peroxoboronates. *Angew. Chem., Int. Ed.* **2010**, *49*, 6186-6189.
13. Wiegand, T.; Eckert, H.; Ekkert, O.; Fröhlich, R.; Kehr, G.; Erker, G.; Grimme, S., New Insights into Frustrated Lewis Pairs: Structural Investigations of Intramolecular Phosphane–Borane Adducts by Using Modern Solid-State NMR Techniques and DFT Calculations. *J. Am. Chem. Soc.* **2012**, *134*, 4236-4249.
14. Erdmann, M.; Rösener, C.; Holtrichter-Rößmann, T.; Daniliuc, C. G.; Fröhlich,

- R.; Uhl, W.; Würthwein, E.-U.; Kehr, G.; Erker, G., Functional group chemistry at intramolecular frustrated Lewis pairs: substituent exchange at the Lewis acid site with 9-BBN. *Dalton Trans.* **2013**, *42*, 709-718.
15. Spies, P.; Erker, G.; Kehr, G.; Bergander, K.; Fröhlich, R.; Grimme, S.; Stephan, D. W., Rapid intramolecular heterolytic dihydrogen activation by a four-membered heterocyclic phosphane–borane adduct. *Chem. Commun.* **2007**, 5072-5074.
  16. Spies, P.; Kehr, G.; Bergander, K.; Wibbeling, B.; Fröhlich, R.; Erker, G., Metal-free dihydrogen activation chemistry: structural and dynamic features of intramolecular P/B pairs. *Dalton Trans.* **2009**, 1534-1541.
  17. Sajid, M.; Kehr, G.; Wiegand, T.; Eckert, H.; Schwickert, C.; Pöttgen, R.; Cardenas, A. J. P.; Warren, T. H.; Fröhlich, R.; Daniliuc, C. G.; Erker, G., Noninteracting, Vicinal Frustrated P/B-Lewis Pair at the Norbornane Framework: Synthesis, Characterization, and Reactions. *J. Am. Chem. Soc.* **2013**, *135*, 8882-8895.
  18. Bertini, F.; Lyaskovskyy, V.; Timmer, B. J. J.; de Kanter, F. J. J.; Lutz, M.; Ehlers, A. W.; Slootweg, J. C.; Lammertsma, K., Preorganized Frustrated Lewis Pairs. *J. Am. Chem. Soc.* **2012**, *134*, 201-204.
  19. Wang, X.; Kehr, G.; Daniliuc, C. G.; Erker, G., Internal Adduct Formation of Active Intramolecular C4-bridged Frustrated Phosphane/Borane Lewis Pairs. *J. Am. Chem. Soc.* **2014**, *136*, 3293-3303.
  20. Axenov, K. V.; Mömning, C. M.; Kehr, G.; Fröhlich, R.; Erker, G., Structure and Dynamic Features of an Intramolecular Frustrated Lewis Pair. *Chem. Eur. J.* **2010**, *16*, 14069-14073.
  21. Spies, P.; Fröhlich, R.; Kehr, G.; Erker, G.; Grimme, S., Structural Importance of Secondary Interactions in Molecules: Origin of Unconventional Conformations of Phosphine–Borane Adducts. *Chem. Eur. J.* **2008**, *14*, 333-343.
  22. Stute, A.; Kehr, G.; Fröhlich, R.; Erker, G., Chemistry of a geminal frustrated Lewis pair featuring electron withdrawing C<sub>6</sub>F<sub>5</sub> substituents at both phosphorus and boron. *Chem. Commun.* **2011**, *47*, 4288-4290.
  23. Rosorius, C.; Kehr, G.; Fröhlich, R.; Grimme, S.; Erker, G., Electronic Control



of Frustrated Lewis Pair Behavior: Chemistry of a Geminal Alkylidene-Bridged Per-pentafluorophenylated P/B Pair. *Organometallics* **2011**, *30*, 4211-4219.

24. Liedtke, R.; Scheidt, F.; Ren, J.; Schirmer, B.; Cardenas, A. J. P.; Daniliuc, C. G.; Eckert, H.; Warren, T. H.; Grimme, S.; Kehr, G.; Erker, G., Frustrated Lewis Pair Modification by 1,1-Carboboration: Disclosure of a Phosphine Oxide Triggered Nitrogen Monoxide Addition to an Intramolecular P/B Frustrated Lewis Pair. *J. Am. Chem. Soc.* **2014**, *136*, 9014-9027.

25. Stute, A.; Kehr, G.; Daniliuc, C. G.; Fröhlich, R.; Erker, G., Electronic control in frustrated Lewis pair chemistry: adduct formation of intramolecular FLP systems with  $-P(C_6F_5)_2$  Lewis base components. *Dalton Trans.* **2013**, *42*, 4487-4499.

26. Mo, Z.; Kolychev, E. L.; Rit, A.; Campos, J.; Niu, H.; Aldridge, S., Facile Reversibility by Design: Tuning Small Molecule Capture and Activation by Single Component Frustrated Lewis Pairs. *J. Am. Chem. Soc.* **2015**, *137*, 12227-12230.

27. Ekkert, O.; Kehr, G.; Fröhlich, R.; Erker, G., P–C Bond Activation Chemistry: Evidence for 1,1-Carboboration Reactions Proceeding with Phosphorus–Carbon Bond Cleavage. *J. Am. Chem. Soc.* **2011**, *133*, 4610-4616.

28. Beckmann, J.; Hupf, E.; Lork, E.; Mebs, S., Peri-Substituted (Ace)Naphthylphosphinoboranes. (Frustrated) Lewis Pairs. *Inorg. Chem.* **2013**, *52*, 11881-11888.

(A)

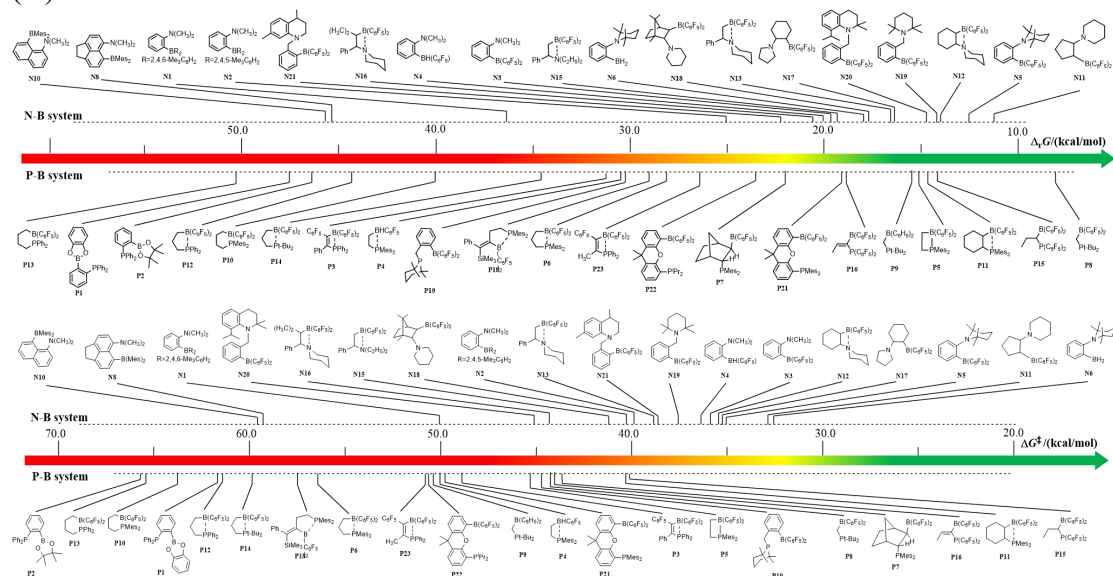

(B)

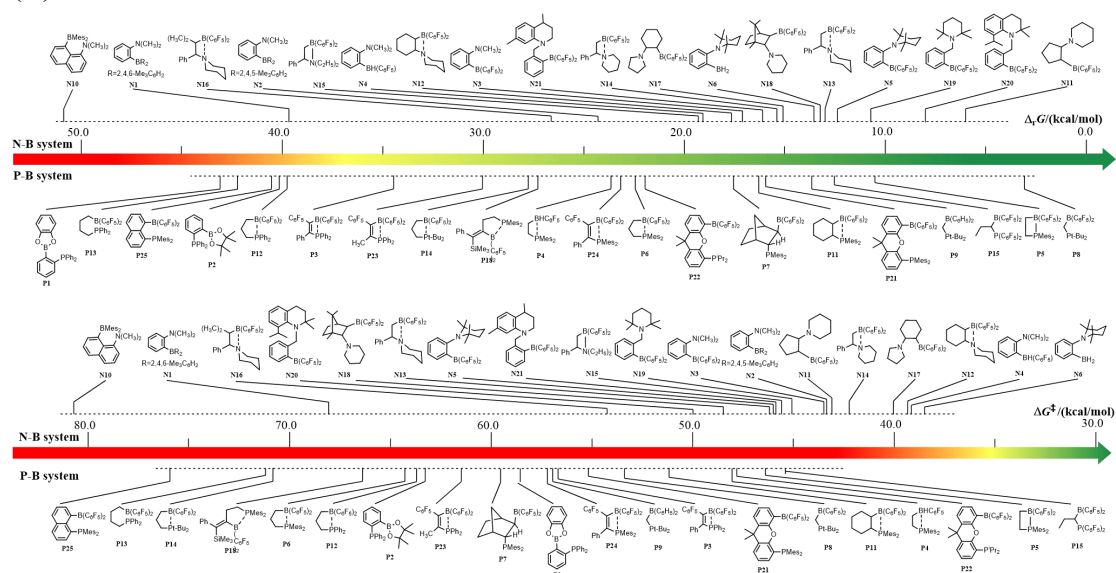

(C)

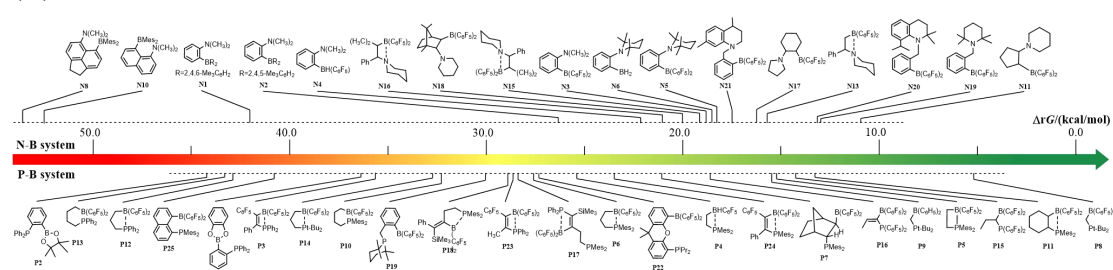

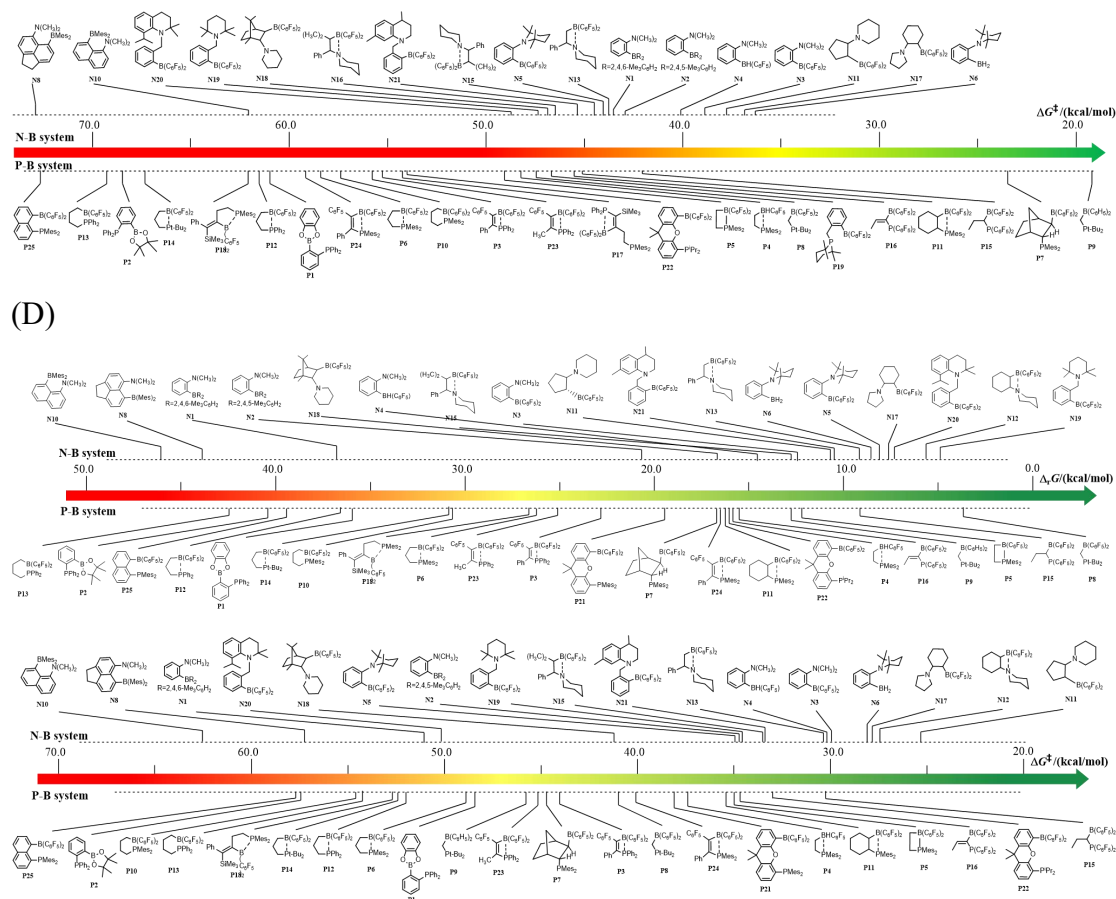

**Figure S1.** The calculated free energies ( $\Delta_r G$ ) and the free energy barrier ( $\Delta G^\ddagger$ ) of the C-H bond activation of (A) methane, (B) methylbenzene, (C) propylene and (D) benzene.

#### 4. Optimized coordinates of collected FLPs.

|    |             |             |             |             |             |             |
|----|-------------|-------------|-------------|-------------|-------------|-------------|
| N1 |             |             | C           | -2.17615000 | -1.55060800 | 0.75852600  |
| H  | -0.82324700 | 3.90975700  | 2.98843400  | C           | -2.58092500 | 0.32747700  |
| C  | -0.32679000 | 3.48894000  | 2.11942200  | C           | -3.51350400 | -1.92301600 |
| C  | -0.56980900 | 2.17088800  | 1.74186000  | C           | -3.90220300 | -0.09359500 |
| C  | 0.54147700  | 4.27068400  | 1.36208000  | C           | -4.39396900 | -1.20920200 |
| C  | 0.06489500  | 1.59824300  | 0.63138900  | H           | -3.87488500 | -2.80375100 |
| H  | -1.27117000 | 1.56966500  | 2.31761900  | H           | -4.56547500 | 0.46535700  |
| C  | 1.15662900  | 3.73239800  | 0.23423000  | C           | 1.02242100  | -0.91306600 |
| H  | 0.73022800  | 5.30372200  | 1.63875200  | C           | 1.91788000  | -1.08481200 |
| C  | 0.92314400  | 2.40593300  | -0.13256600 | C           | 1.25570700  | -1.62811000 |
| H  | 1.81470900  | 4.35182600  | -0.36931900 | C           | 2.98409300  | -1.97564900 |
| B  | -0.19519200 | 0.08380400  | 0.26665800  | C           | 2.34698600  | -2.49506400 |
| C  | -1.68808400 | -0.39857400 | 0.09814800  | C           | 3.21879900  | -2.68979300 |

|    |             |             |             |   |             |             |             |
|----|-------------|-------------|-------------|---|-------------|-------------|-------------|
| H  | 3.65611500  | -2.11201000 | 1.97552900  | H | 0.28724200  | 5.67355700  | -0.67783300 |
| H  | 2.51915600  | -3.03167300 | -2.04609900 | C | -0.25460600 | 2.52495900  | 0.48128500  |
| C  | 2.89644900  | 1.45690100  | -1.14512900 | H | -0.63004500 | 4.48376900  | 1.29742300  |
| H  | 2.99881500  | 0.81850400  | -0.26542700 | B | 0.14783500  | 0.20414300  | -0.52021900 |
| H  | 3.23058300  | 0.88981900  | -2.02032400 | C | 1.48262100  | -0.61305100 | -0.43232400 |
| H  | 3.55730000  | 2.33327300  | -1.02632500 | C | 1.67694300  | -1.92232600 | -0.92712400 |
| C  | 1.35697500  | 2.69141800  | -2.50330400 | C | 2.56359600  | 0.00020600  | 0.22840100  |
| H  | 2.01090300  | 3.57952700  | -2.48760800 | C | 2.90764900  | -2.54652800 | -0.71311500 |
| H  | 1.61482900  | 2.10938600  | -3.39412500 | C | 3.78052000  | -0.63171600 | 0.46448200  |
| H  | 0.32207500  | 3.02998800  | -2.59760000 | C | 3.95315800  | -1.93972200 | -0.01769100 |
| N  | 1.49956500  | 1.84071700  | -1.32788600 | H | 3.06058900  | -3.54888700 | -1.10955900 |
| C  | 4.38365700  | -3.63990100 | -0.14511200 | C | -1.26068500 | -0.48991800 | -0.46912200 |
| H  | 5.33529900  | -3.11425100 | -0.01482800 | C | -2.36496500 | -0.13399900 | -1.26785500 |
| H  | 4.33158500  | -4.40978500 | 0.63147700  | C | -1.45051600 | -1.47426000 | 0.51381400  |
| H  | 4.40683200  | -4.14152400 | -1.11545900 | C | -3.58864600 | -0.77268900 | -1.05275000 |
| C  | 0.37458900  | -1.42508100 | -2.23256200 | C | -2.67695700 | -2.09139300 | 0.74843000  |
| H  | 0.72259400  | -2.02452400 | -3.07770700 | C | -3.77113500 | -1.73249300 | -0.05730600 |
| H  | -0.66533300 | -1.69719900 | -2.02756100 | H | -4.43698900 | -0.50849600 | -1.68186400 |
| H  | 0.38742700  | -0.37068000 | -2.53466100 | C | -2.18064100 | 1.87808600  | 1.78788400  |
| C  | 1.76785500  | -0.30429100 | 2.53142600  | H | -2.67801600 | 1.59012400  | 0.85772100  |
| H  | 2.13892500  | 0.72054700  | 2.41468700  | H | -2.49607400 | 1.18044900  | 2.57058000  |
| H  | 0.72644800  | -0.22297900 | 2.85678800  | H | -2.51728900 | 2.89071800  | 2.07088800  |
| H  | 2.33380600  | -0.77526500 | 3.33941800  | C | -0.03224100 | 2.10471100  | 2.85367500  |
| C  | -1.29608300 | -2.42091800 | 1.62733300  | H | -0.23584500 | 3.12285700  | 3.22787600  |
| H  | -0.62638400 | -3.03874700 | 1.02039200  | H | -0.33567100 | 1.39567500  | 3.63056600  |
| H  | -0.66749500 | -1.83658400 | 2.30372200  | H | 1.04532600  | 2.00384400  | 2.69965600  |
| H  | -1.90797500 | -3.08985300 | 2.23800700  | N | -0.73699400 | 1.78441100  | 1.62123600  |
| C  | -5.83708200 | -1.61929800 | -0.32212900 | C | -5.11221300 | -2.38736900 | 0.13919000  |
| H  | -5.94901400 | -2.70546600 | -0.26729800 | H | -5.48526500 | -2.23939600 | 1.15874000  |
| H  | -6.43709200 | -1.18668000 | 0.48613700  | H | -5.85340700 | -1.98255700 | -0.55364800 |
| H  | -6.26445600 | -1.27716300 | -1.26818100 | H | -5.05504900 | -3.46971500 | -0.02359800 |
| C  | -2.13459600 | 1.54094200  | -1.50905300 | C | -2.26266700 | 0.91402100  | -2.35097400 |
| H  | -2.08250600 | 2.43166300  | -0.87399400 | H | -2.17363500 | 1.92015200  | -1.92679500 |
| H  | -1.14200400 | 1.39602700  | -1.94624100 | H | -1.38565000 | 0.75799200  | -2.98713500 |
| H  | -2.83577200 | 1.74797300  | -2.32184300 | H | -3.14777000 | 0.89632100  | -2.99239600 |
|    |             |             |             | C | 0.62902900  | -2.68033000 | -1.70904100 |
| N2 |             |             |             | H | -0.03696100 | -3.24278100 | -1.04638800 |
| H  | 1.22576600  | 4.37777400  | -2.57676400 | H | -0.00150200 | -2.01820600 | -2.30548000 |
| C  | 0.80191400  | 3.86039200  | -1.72136500 | H | 1.10787600  | -3.39609500 | -2.38313300 |
| C  | 0.79430600  | 2.46897100  | -1.68176800 | C | 5.25419900  | -2.66509300 | 0.19436700  |
| C  | 0.27756700  | 4.58797000  | -0.65430600 | H | 5.20785800  | -3.68335900 | -0.19794200 |
| C  | 0.24069300  | 1.77928200  | -0.59537500 | H | 6.08303500  | -2.14816500 | -0.30246400 |
| H  | 1.21969000  | 1.90800400  | -2.51140000 | H | 5.50851300  | -2.72157800 | 1.25846400  |
| C  | -0.24208900 | 3.92110900  | 0.45167700  | H | 2.43987800  | 1.02273200  | 0.58106200  |

|   |             |             |            |   |             |             |             |
|---|-------------|-------------|------------|---|-------------|-------------|-------------|
| H | -0.59957900 | -1.76279500 | 1.13015400 | F | -1.49591300 | -1.14612000 | 2.17760400  |
| C | -2.82698800 | -3.12619900 | 1.83223000 | C | -3.11826300 | -1.72309300 | 0.63216700  |
| H | -3.55992700 | -2.81492400 | 2.58535000 | F | -3.68491900 | -2.50593700 | 1.55101600  |
| H | -3.17258600 | -4.08526400 | 1.43040900 | C | -3.66601200 | -1.64032400 | -0.63803000 |
| H | -1.87599000 | -3.29756100 | 2.34187400 | F | -4.75866300 | -2.33413700 | -0.94549700 |
| C | 4.88878400  | 0.07079400  | 1.20312400 | C | -3.05928400 | -0.83159600 | -1.58597300 |
| H | 5.14754000  | -0.45082200 | 2.13158500 | F | -3.56535400 | -0.75691300 | -2.81689500 |
| H | 5.80444800  | 0.12263100  | 0.60345100 | C | -1.92554700 | -0.10988100 | -1.23841300 |
| H | 4.59948700  | 1.09191500  | 1.46236600 | F | -1.36895900 | 0.62223800  | -2.21373600 |

### N3

|   |             |             |             |
|---|-------------|-------------|-------------|
| B | 0.01184400  | 0.70805800  | 0.27092100  |
| C | 0.05421200  | 2.20245800  | -0.34144000 |
| C | 0.06873200  | 3.05461600  | -1.44427100 |
| H | 0.03969600  | 2.67150800  | -2.45854800 |
| C | 0.12678800  | 4.42887600  | -1.20974300 |
| H | 0.13905700  | 5.11380900  | -2.05224100 |
| C | 0.17160800  | 4.95658100  | 0.08749900  |
| H | 0.21745000  | 6.03226400  | 0.22417100  |
| C | 0.15885000  | 4.12174000  | 1.20514300  |
| H | 0.19334500  | 4.51767000  | 2.21559600  |
| C | 0.09843500  | 2.76795700  | 0.91361400  |
| N | 0.06493500  | 1.58464500  | 1.78527400  |
| C | -1.12753800 | 1.60701300  | 2.66571600  |
| H | -1.10338400 | 2.51837900  | 3.26986600  |
| H | -1.12087200 | 0.73462100  | 3.31555500  |
| H | -2.02697900 | 1.60850500  | 2.04858300  |
| C | 1.29323000  | 1.47835700  | 2.60687400  |
| H | 2.16415900  | 1.50148300  | 1.95142500  |
| H | 1.27179100  | 0.54573100  | 3.16891100  |
| H | 1.33740300  | 2.32523600  | 3.29747800  |
| C | 1.32040000  | -0.21766600 | 0.03810400  |
| C | 1.74128500  | -1.21198000 | 0.91565600  |
| F | 1.07859100  | -1.41396800 | 2.06675800  |
| C | 2.83410800  | -2.03363300 | 0.68250500  |
| F | 3.19599500  | -2.95813900 | 1.57240300  |
| C | 3.54880800  | -1.89089400 | -0.49787800 |
| F | 4.59755300  | -2.67105800 | -0.74437600 |
| C | 3.15468900  | -0.93345100 | -1.41818700 |
| F | 3.82490800  | -0.79597200 | -2.56217300 |
| C | 2.05928400  | -0.12486800 | -1.13836100 |
| F | 1.72476700  | 0.75724100  | -2.08811200 |
| C | -1.34983600 | -0.13849700 | 0.03052600  |
| C | -1.97686400 | -0.99124100 | 0.93361700  |

### N4

|   |             |             |             |
|---|-------------|-------------|-------------|
| B | -0.89179000 | 0.37601200  | -0.97506300 |
| C | -2.12227300 | -0.59691900 | -0.61141800 |
| C | -2.80329300 | -1.80099200 | -0.76229800 |
| H | -2.40325800 | -2.61364000 | -1.36163400 |
| C | -4.03062200 | -1.94910400 | -0.11004400 |
| H | -4.58078800 | -2.88003700 | -0.21211300 |
| C | -4.57492700 | -0.92902600 | 0.67904500  |
| H | -5.53091700 | -1.08636300 | 1.16852700  |
| C | -3.90534100 | 0.28484900  | 0.85204000  |
| H | -4.31425800 | 1.08108200  | 1.46702400  |
| C | -2.69512600 | 0.37737000  | 0.18607400  |
| N | -1.68890700 | 1.44632400  | 0.11021300  |
| C | -1.04745100 | 1.71728400  | 1.41289700  |
| H | -1.77542700 | 2.15947200  | 2.09933500  |
| H | -0.21832300 | 2.41044600  | 1.26145900  |
| H | -0.67705700 | 0.78015900  | 1.82991100  |
| C | -2.17917300 | 2.69539200  | -0.50522900 |
| H | -2.69553100 | 2.45155800  | -1.43373400 |
| H | -1.32193800 | 3.33524600  | -0.72329100 |
| H | -2.86391700 | 3.20957100  | 0.17631300  |
| C | 0.60972600  | 0.04268800  | -0.51265900 |
| C | 1.54920200  | 1.06155100  | -0.40910400 |
| F | 1.16773700  | 2.33040300  | -0.65377300 |
| C | 2.87062500  | 0.85743700  | -0.04558300 |
| F | 3.72683300  | 1.87618000  | 0.05141100  |
| C | 3.29883500  | -0.43643000 | 0.22051600  |
| F | 4.56343000  | -0.66218700 | 0.57082200  |
| C | 2.40180100  | -1.48878400 | 0.12279500  |
| F | 2.81148700  | -2.73283200 | 0.37518900  |
| C | 1.08280900  | -1.23378800 | -0.23705600 |
| F | 0.27043200  | -2.29626600 | -0.32019800 |
| H | -0.92530200 | 0.90133300  | -2.05888700 |

|    |             |             |             |    |             |             |             |
|----|-------------|-------------|-------------|----|-------------|-------------|-------------|
| N5 |             |             |             | F  | -4.98728584 | -2.34491017 | -0.33193459 |
| B  | -0.65587027 | -0.04626210 | 0.51741946  | C  | -4.92501602 | -0.00949266 | -0.59903195 |
| C  | -0.01053240 | -1.23660925 | 1.28990584  | F  | -6.20634376 | 0.00357978  | -0.92902345 |
| C  | -0.66411204 | -1.65300561 | 2.46014173  | C  | -4.20371589 | 1.17483661  | -0.55701831 |
| H  | -1.61051289 | -1.18924146 | 2.73036051  | F  | -4.80135765 | 2.32582750  | -0.84752826 |
| C  | -0.12454564 | -2.62508093 | 3.29053379  | C  | -2.86065862 | 1.14169008  | -0.20892216 |
| H  | -0.63541229 | -2.91328299 | 4.20315561  | F  | -2.24570716 | 2.32299764  | -0.18550379 |
| C  | 1.06429852  | -3.24259282 | 2.91778781  | C  | 0.18546447  | 1.27714506  | 0.34019610  |
| H  | 1.48673918  | -4.03140196 | 3.53261575  | C  | 0.49474493  | 2.02396739  | 1.46827815  |
| C  | 1.70860524  | -2.87081098 | 1.74161168  | F  | 0.03422101  | 1.62757963  | 2.66239267  |
| H  | 2.60768499  | -3.39526023 | 1.44569305  | C  | 1.25835473  | 3.18199137  | 1.41535814  |
| C  | 1.20787323  | -1.84662873 | 0.92551515  | F  | 1.52663960  | 3.87608806  | 2.51783741  |
| N  | 1.87327607  | -1.43387084 | -0.28487522 | C  | 1.75316778  | 3.60592593  | 0.18849154  |
| C  | 3.28270930  | -0.94923981 | -0.11980230 | F  | 2.49926578  | 4.70231670  | 0.11416971  |
| C  | 3.70843539  | -0.28918954 | -1.44157007 | C  | 1.45421856  | 2.88778093  | -0.96389568 |
| H  | 3.06468083  | 0.58244858  | -1.61933607 | F  | 1.93722360  | 3.28259430  | -2.13961011 |
| H  | 4.73298295  | 0.08119674  | -1.32784478 | C  | 0.65975722  | 1.75467861  | -0.86997008 |
| C  | 3.57986799  | -1.23416036 | -2.62533243 | F  | 0.36585502  | 1.10484409  | -2.00505558 |
| H  | 4.21047116  | -2.12057789 | -2.48168308 |    |             |             |             |
| H  | 3.92442533  | -0.74929582 | -3.54410238 | N6 |             |             |             |
| C  | 2.11290610  | -1.61479742 | -2.75478585 | C  | -1.08329500 | -1.29709700 | -0.08292900 |
| H  | 1.95224704  | -2.30570696 | -3.59027590 | N  | -0.39180600 | 0.00000400  | 0.14359200  |
| H  | 1.54065072  | -0.70529137 | -2.96805084 | C  | -1.08333800 | 1.29709400  | -0.08288700 |
| C  | 1.52876679  | -2.26534812 | -1.48869423 | C  | -2.45919400 | 1.23684000  | 0.60146900  |
| C  | 1.98753071  | -3.73654026 | -1.41145583 | C  | -3.26000500 | -0.00004200 | 0.21880600  |
| H  | 3.06909044  | -3.85118529 | -1.50095933 | C  | -2.45915500 | -1.23691200 | 0.60142600  |
| H  | 1.53649989  | -4.29404337 | -2.23838532 | C  | 1.02330500  | 0.00001900  | -0.06589800 |
| H  | 1.65859809  | -4.20771656 | -0.48190926 | C  | 1.89274600  | -0.00000600 | 1.05680400  |
| C  | 0.00700169  | -2.28025577 | -1.66453485 | C  | 3.28083100  | 0.00000800  | 0.82738600  |
| H  | -0.37742047 | -1.25603807 | -1.72563472 | C  | 3.81886600  | 0.00003500  | -0.45394000 |
| H  | -0.50032440 | -2.81059925 | -0.85752883 | C  | 2.95541000  | 0.00004200  | -1.54466500 |
| H  | -0.23856775 | -2.77962368 | -2.60678313 | C  | 1.57399600  | 0.00003200  | -1.35198100 |
| C  | 4.34453466  | -2.00397861 | 0.28051481  | B  | 1.40120600  | -0.00005700 | 2.52226900  |
| H  | 4.29070780  | -2.23280526 | 1.34716262  | C  | -1.25323700 | 1.70134300  | -1.56105100 |
| H  | 5.34095639  | -1.58955628 | 0.09564953  | C  | -0.28118300 | 2.41098400  | 0.60201800  |
| H  | 4.26777925  | -2.93837392 | -0.27492976 | C  | -1.25316400 | -1.70130200 | -1.56110800 |
| C  | 3.32155488  | 0.13750544  | 0.96047579  | C  | -0.28109400 | -2.41097100 | 0.60194700  |
| H  | 2.78352100  | 1.02757115  | 0.63561739  | H  | 0.24888100  | -0.00012600 | 2.82057000  |
| H  | 4.36298480  | 0.42038363  | 1.14300864  | H  | 3.94678600  | -0.00000800 | 1.68640600  |
| H  | 2.89682959  | -0.20880779 | 1.90708183  | H  | 4.89372200  | 0.00004100  | -0.60335500 |
| C  | -2.17812519 | -0.03945109 | 0.12110816  | H  | 3.35422100  | 0.00005500  | -2.55507500 |
| C  | -2.95700675 | -1.20697426 | 0.06372462  | H  | 0.91553800  | 0.00003300  | -2.21310700 |
| F  | -2.43646198 | -2.40073188 | 0.34104405  | H  | -2.29780800 | 1.22676200  | 1.68736900  |
| C  | -4.29818465 | -1.20904127 | -0.28979371 | H  | -3.00789900 | 2.15461100  | 0.36067200  |

|    |             |             |             |    |             |             |             |
|----|-------------|-------------|-------------|----|-------------|-------------|-------------|
| H  | -4.22416100 | -0.00006600 | 0.73798700  | H  | -5.84967900 | -0.20277400 | -0.60979900 |
| H  | -3.48421600 | -0.00002700 | -0.85517200 | H  | -5.68925300 | -0.31175300 | 1.13646500  |
| H  | -3.00783100 | -2.15469300 | 0.36059600  | H  | -4.55669400 | 2.45728700  | 0.32329000  |
| H  | -2.29777100 | -1.22686700 | 1.68732700  | H  | -2.27299900 | 3.36567400  | 0.14046500  |
| H  | -0.28331000 | -1.79470200 | -2.05675400 | H  | 0.02709700  | -2.99357500 | -0.16329400 |
| H  | -1.86447200 | -0.99771300 | -2.12922500 | H  | -2.30941000 | -3.77148600 | -0.13823300 |
| H  | -1.74138300 | -2.68030700 | -1.61883200 | H  | 1.35030700  | 3.47213400  | 0.49741000  |
| H  | 0.68162900  | -2.58617700 | 0.11298600  | H  | -0.24300800 | 4.10365500  | 0.06162400  |
| H  | -0.85276600 | -3.34365000 | 0.56166200  | H  | -0.03487200 | 3.16092700  | 1.56374000  |
| H  | -0.09678200 | -2.16778100 | 1.65295800  | H  | 1.47114200  | 2.33168100  | -1.66618800 |
| H  | -1.86452000 | 0.99774800  | -2.12918800 | H  | -0.17249400 | 2.89857500  | -2.08688200 |
| H  | -0.28339400 | 1.79480600  | -2.05670300 | H  | 0.22517800  | 1.15493900  | -2.09206500 |
| H  | -1.74150100 | 2.68032800  | -1.61873600 | H  | 4.25670400  | -0.14831200 | -2.47551700 |
| H  | 0.68152500  | 2.58625700  | 0.11305100  | H  | 5.26567900  | 0.16036900  | -1.05027300 |
| H  | -0.09684600 | 2.16776700  | 1.65301800  | H  | 3.92906600  | 1.26000800  | -1.45502200 |
| H  | -0.85290300 | 3.34363600  | 0.56177300  | H  | 3.50758900  | -2.40038600 | -1.82530000 |
| H  | 2.22294900  | -0.00006800 | 3.39091300  | H  | 4.68499200  | -2.32654900 | -0.49547200 |
| N7 |             |             |             | H  | 2.98916900  | -2.74137500 | -0.16465700 |
| C  | -4.62187200 | -1.91695000 | 0.05788100  | H  | 3.93383200  | -0.58690200 | 2.85918200  |
| C  | -5.15126600 | -0.45394200 | 0.19416100  | H  | 5.14758600  | -0.77187900 | 1.58006500  |
| C  | -3.72320400 | 1.76986900  | 0.21152700  | H  | 3.91192800  | -2.02665100 | 1.83113500  |
| C  | -2.40241400 | 2.28825200  | 0.11654800  | H  | 2.95055200  | 1.54774200  | 2.07906700  |
| C  | -1.29063800 | 1.47982400  | -0.01822700 | H  | 4.31986900  | 1.63741800  | 0.94481800  |
| C  | -0.40610200 | -0.90568400 | -0.09266800 | H  | 2.64450200  | 1.80114400  | 0.35419800  |
| C  | -0.76191100 | -2.24450100 | -0.13129900 |    |             |             |             |
| C  | -2.10517400 | -2.70513800 | -0.10783800 | N8 |             |             |             |
| C  | -3.91008600 | 0.41541400  | 0.13981100  | C  | -4.51329200 | -2.49779400 | -1.70300000 |
| C  | -1.45382400 | 0.06058700  | -0.04234300 | H  | -4.68366900 | -3.56273200 | -1.51811200 |
| C  | -3.11366800 | -1.78056600 | -0.02257800 | H  | -4.71231200 | -2.32521000 | -2.76500700 |
| C  | -2.77445500 | -0.41268700 | 0.01196100  | C  | -5.41731600 | -1.60839900 | -0.79653500 |
| C  | 0.28002400  | 3.24923800  | 0.52193500  | H  | -6.06679800 | -0.96012200 | -1.39282700 |
| C  | 0.40307300  | 2.10394500  | -1.58437800 | H  | -6.07075700 | -2.21402700 | -0.16143900 |
| C  | 3.30571800  | -0.64143400 | -0.61367100 | C  | -4.64277200 | 0.13882800  | 1.02541100  |
| C  | 3.17541800  | -0.21884600 | 0.88475800  | H  | -5.63734900 | 0.42873900  | 1.35183000  |
| C  | 4.24598100  | 0.21577900  | -1.44513900 | C  | -3.50521300 | 0.70373900  | 1.65098400  |
| C  | 3.64887700  | -2.12073700 | -0.77859600 | H  | -3.65900700 | 1.40541800  | 2.46727900  |
| C  | 4.10001400  | -0.95201200 | 1.84258300  | C  | -2.20545100 | 0.38920400  | 1.29073700  |
| C  | 3.29044800  | 1.29068100  | 1.07268800  | C  | -0.70302200 | -0.94017600 | -0.30964900 |
| O  | 1.95766200  | -0.46915500 | -1.09615700 | C  | -0.70405600 | -1.96630800 | -1.24754500 |
| O  | 1.81306000  | -0.57834800 | 1.18244700  | H  | 0.25415500  | -2.31068400 | -1.63185500 |
| B  | 1.12205500  | -0.56508500 | -0.00457700 | C  | -1.87944800 | -2.55765100 | -1.78534800 |
| N  | 0.03813300  | 1.99230300  | -0.17031000 | H  | -1.79529300 | -3.33985200 | -2.53441700 |
| H  | -5.02035300 | -2.40332700 | -0.83791600 | C  | -4.44869800 | -0.79079100 | 0.03428500  |
| H  | -4.91905500 | -2.53379600 | 0.91121100  | C  | -1.97343600 | -0.52860100 | 0.22285700  |

|   |             |             |             |    |             |             |             |
|---|-------------|-------------|-------------|----|-------------|-------------|-------------|
| C | -3.09481900 | -2.10696800 | -1.34446100 | H  | 0.97714100  | 5.94118000  | -2.02811800 |
| C | -3.12713400 | -1.11055600 | -0.33993100 | H  | 2.48137800  | 5.86760500  | -1.09762800 |
| C | -1.04407000 | 2.37130500  | 2.04394900  | C  | -0.77586100 | 1.32056100  | -2.42484500 |
| H | -1.05201000 | 2.75156700  | 1.02050500  | H  | -1.00983800 | 1.97307400  | -3.27003600 |
| H | -0.11725900 | 2.69847500  | 2.52631400  | H  | -1.72040800 | 1.04105500  | -1.94769900 |
| H | -1.88792200 | 2.81452500  | 2.59852900  | H  | -0.34040900 | 0.40034600  | -2.82413400 |
| C | -1.09213000 | 0.40718800  | 3.40902200  | B  | 0.66823400  | -0.19127100 | -0.15884900 |
| H | -1.92080800 | 0.82053200  | 4.00824500  | N  | -1.08634700 | 0.91108300  | 2.03593800  |
| H | -0.15055800 | 0.68024100  | 3.89833400  |    |             |             |             |
| H | -1.18476600 | -0.68117300 | 3.40763900  | N9 |             |             |             |
| C | 1.98100200  | -1.07401700 | -0.04208700 | C  | -4.32162000 | -1.16712300 | -0.18752400 |
| C | 3.00982800  | -0.97019900 | -1.00300100 | C  | -3.07380300 | -1.82608100 | -0.09011600 |
| C | 4.14937800  | -1.77291200 | -0.89511400 | C  | -1.90510900 | -1.10870200 | 0.00577300  |
| H | 4.92735200  | -1.68801200 | -1.65156400 | C  | -0.73318600 | 1.08296200  | 0.01450700  |
| C | 4.31682400  | -2.67505500 | 0.15109200  | C  | -0.83072500 | 2.45902000  | 0.02878300  |
| C | 3.29756300  | -2.77445400 | 1.09928600  | C  | -2.07991000 | 3.11980100  | -0.00176200 |
| H | 3.40824000  | -3.47339700 | 1.92688400  | C  | -4.38486800 | 0.19983500  | -0.16638900 |
| C | 2.13984900  | -2.00527100 | 1.00867300  | C  | -1.93539400 | 0.31894200  | -0.01412600 |
| C | 2.92686200  | -0.02243500 | -2.17933100 | C  | -3.23825300 | 2.39108000  | -0.06489800 |
| H | 3.14442300  | 1.00914200  | -1.88379900 | C  | -3.19749200 | 0.97339200  | -0.07744200 |
| H | 1.93381100  | -0.02057400 | -2.63831200 | C  | -0.47457100 | -2.95916000 | -0.61492100 |
| H | 3.64784600  | -0.30977400 | -2.94942100 | C  | -0.32850500 | -1.97565300 | 1.57876900  |
| C | 5.54149200  | -3.54667000 | 0.24642400  | C  | 2.88163700  | 0.40433800  | 0.64254500  |
| H | 5.93856400  | -3.56407700 | 1.26566600  | C  | 2.76119800  | -0.07660600 | -0.83913300 |
| H | 6.33245900  | -3.19666000 | -0.42125600 | C  | 3.73460800  | -0.47784900 | 1.54042500  |
| H | 5.30684500  | -4.58119800 | -0.02687300 | C  | 3.32952000  | 1.86101600  | 0.75111200  |
| C | 1.07350000  | -2.16474800 | 2.06508500  | C  | 3.76062100  | 0.54529100  | -1.80137700 |
| H | 1.45945000  | -2.70320900 | 2.93472200  | C  | 2.78572500  | -1.59714400 | -0.95296100 |
| H | 0.21103900  | -2.71742800 | 1.67729300  | O  | 1.51393900  | 0.35414700  | 1.09187500  |
| H | 0.70358500  | -1.19227200 | 2.40165900  | O  | 1.43762300  | 0.36358000  | -1.19453100 |
| C | 0.80484700  | 1.36583700  | -0.39754800 | B  | 0.71460300  | 0.47391400  | -0.02899600 |
| C | 1.65961100  | 2.12797700  | 0.43506400  | N  | -0.62139700 | -1.73451800 | 0.16317600  |
| C | 1.84105900  | 3.48910200  | 0.20321900  | H  | -5.22971000 | -1.75686800 | -0.26219900 |
| H | 2.49124600  | 4.05848600  | 0.86597700  | H  | -3.04940600 | -2.91069500 | -0.07671700 |
| C | 1.20623200  | 4.14395800  | -0.85309900 | H  | 0.07559900  | 3.06028200  | 0.04980000  |
| C | 0.36506800  | 3.39467300  | -1.66929900 | H  | -2.11538700 | 4.20462100  | 0.01024900  |
| H | -0.13867400 | 3.88480500  | -2.50001300 | H  | 0.55997500  | -3.30323000 | -0.55339500 |
| C | 0.14923700  | 2.02799600  | -1.45940500 | H  | -1.11397900 | -3.77916900 | -0.25206200 |
| C | 2.35425900  | 1.51153200  | 1.62743200  | H  | -0.71477800 | -2.75716000 | -1.66057700 |
| H | 3.22702000  | 0.92141400  | 1.33063900  | H  | 0.70863200  | -2.31080900 | 1.68082200  |
| H | 1.67891400  | 0.84414400  | 2.17336300  | H  | -0.99953700 | -2.73748800 | 2.00657500  |
| H | 2.69440800  | 2.28898100  | 2.31761800  | H  | -0.43445000 | -1.04492400 | 2.13848900  |
| C | 1.41604900  | 5.61790900  | -1.08107700 | H  | 3.75858700  | -0.05714200 | 2.54886300  |
| H | 0.95756000  | 6.20861100  | -0.28076800 | H  | 4.76203400  | -0.53013500 | 1.16594700  |



|     |             |             |             |     |             |             |             |
|-----|-------------|-------------|-------------|-----|-------------|-------------|-------------|
| H   | 3.33141700  | -1.49004300 | 1.60354400  | H   | -0.71434500 | 4.29548400  | 1.36848500  |
| H   | 3.17711500  | 2.19964500  | 1.77858100  | C   | 0.97926400  | 3.31312400  | -1.37959900 |
| H   | 4.38605200  | 1.97931900  | 0.49431400  | H   | 1.58652100  | 3.71682100  | -2.18721500 |
| H   | 2.73562700  | 2.49730700  | 0.08784600  | C   | 0.46583000  | 4.18243500  | -0.42248600 |
| H   | 3.60081400  | 0.14023300  | -2.80384200 | C   | 1.34121600  | 1.10055200  | -2.44882000 |
| H   | 4.78593800  | 0.31156800  | -1.49639600 | H   | 0.60582000  | 0.44342500  | -2.92117300 |
| H   | 3.64357000  | 1.62890900  | -1.84956300 | H   | 2.14898700  | 0.45863400  | -2.08440600 |
| H   | 2.43785900  | -1.88404800 | -1.94859000 | H   | 1.75623700  | 1.74917800  | -3.22431600 |
| H   | 3.79189900  | -1.99720200 | -0.79852100 | C   | -1.40221900 | 1.77369500  | 1.83425500  |
| H   | 2.11270600  | -2.03569900 | -0.21272100 | H   | -1.43455000 | 2.52658100  | 2.62685400  |
| H   | -4.20512200 | 2.88532200  | -0.10883700 | H   | -0.97515200 | 0.85619600  | 2.25269700  |
| H   | -5.34041700 | 0.71350400  | -0.22521200 | H   | -2.43330600 | 1.54770600  | 1.54434800  |
|     |             |             |             | C   | 0.72732100  | 5.66436000  | -0.48480100 |
| N10 |             |             |             | H   | -0.18713500 | 6.21426500  | -0.73136300 |
| B   | -0.40739200 | -0.15249700 | -0.21529400 | H   | 1.47663900  | 5.90454000  | -1.24285400 |
| C   | 1.97096900  | -1.42742300 | -0.19888500 | H   | 1.08310400  | 6.04437000  | 0.47766200  |
| C   | 0.60803400  | -1.28168000 | -0.63302400 | C   | -1.93027400 | -0.57673800 | -0.04518100 |
| C   | 2.49039700  | -0.78178600 | 0.96605500  | C   | -2.90738400 | -0.05286800 | -0.92538300 |
| C   | 2.85512500  | -2.26962900 | -0.94064400 | C   | -2.35028800 | -1.50317200 | 0.93216800  |
| C   | 3.82213200  | -0.91628400 | 1.29672100  | C   | -3.69749500 | -1.85099700 | 1.04633500  |
| H   | 4.20191000  | -0.42235000 | 2.18668400  | H   | -3.99736700 | -2.55304700 | 1.82217600  |
| C   | 0.17046500  | -2.07360100 | -1.68022100 | C   | -4.24261000 | -0.43846200 | -0.79739300 |
| H   | -0.86823100 | -2.00331600 | -1.99517500 | H   | -4.97733200 | -0.03269100 | -1.49058200 |
| C   | 2.04517600  | 1.32832800  | 2.05177800  | C   | -4.66287400 | -1.32725700 | 0.19087700  |
| H   | 2.97785400  | 1.37641600  | 2.63603000  | C   | -1.37776900 | -2.08938700 | 1.92266500  |
| H   | 1.27344200  | 1.86867800  | 2.60796300  | H   | -1.17810700 | -1.38355600 | 2.73681100  |
| H   | 2.19754700  | 1.83191900  | 1.09564900  | H   | -0.42027400 | -2.32836700 | 1.45338200  |
| C   | 2.35737300  | -3.00268300 | -2.05363900 | H   | -1.77787500 | -3.00192800 | 2.37262000  |
| H   | 3.04630000  | -3.63650200 | -2.60554700 | C   | -2.55970800 | 0.91382300  | -2.03646300 |
| C   | 4.21781700  | -2.38227400 | -0.56676200 | H   | -3.37015700 | 0.95636700  | -2.76887900 |
| H   | 4.86872000  | -3.02081900 | -1.15755600 | H   | -1.64890500 | 0.62112700  | -2.56776500 |
| C   | 1.46395500  | -0.72187600 | 3.12536100  | H   | -2.39613000 | 1.92655800  | -1.65501300 |
| H   | 1.18260300  | -1.76611700 | 2.98063100  | C   | -6.10825700 | -1.73703300 | 0.29943500  |
| H   | 0.68469800  | -0.22343200 | 3.71157200  | H   | -6.77506800 | -0.91470700 | 0.02635100  |
| H   | 2.39936700  | -0.69366900 | 3.70809700  | H   | -6.35598900 | -2.05477900 | 1.31543800  |
| C   | 4.69844100  | -1.70247200 | 0.52122500  | H   | -6.33011000 | -2.57465500 | -0.37101800 |
| H   | 5.74238900  | -1.78418200 | 0.80660500  |     |             |             |             |
| C   | 1.03724100  | -2.92981600 | -2.40047500 | N11 |             |             |             |
| H   | 0.65211800  | -3.51117800 | -3.23238400 | B   | 0.28342300  | 0.08666700  | -0.86084000 |
| N   | 1.59712900  | -0.04773500 | 1.83191100  | N   | -0.90263500 | 2.11483500  | 0.59485500  |
| C   | -0.05321100 | 1.38717800  | -0.30520900 | C   | 0.16320500  | 2.45368100  | -0.33789500 |
| C   | -0.58338100 | 2.27315700  | 0.66493800  | H   | 1.09992000  | 2.31925600  | 0.22375200  |
| C   | 0.73987600  | 1.93479300  | -1.33864600 | C   | 0.22375600  | 1.48707400  | -1.55443800 |
| C   | -0.31302200 | 3.63793600  | 0.59886600  | H   | -0.68191300 | 1.63579800  | -2.14717700 |

|   |             |             |             |     |             |             |             |
|---|-------------|-------------|-------------|-----|-------------|-------------|-------------|
| C | 1.40517800  | 2.08664400  | -2.32383400 | F   | 1.25622900  | 0.37048400  | 1.94419600  |
| H | 2.35012500  | 1.78780100  | -1.85539500 | C   | 2.09405300  | -0.17254900 | 1.05227300  |
| H | 1.43918300  | 1.75585800  | -3.36420100 |     |             |             |             |
| C | 1.20885300  | 3.62501700  | -2.19198000 | N12 |             |             |             |
| H | 2.16494200  | 4.12465500  | -2.01672900 | N   | 0.03104700  | 1.97033800  | 0.93738400  |
| H | 0.79817200  | 4.04284100  | -3.11456900 | B   | -0.08146300 | 0.61372600  | -0.18456700 |
| C | 0.22833200  | 3.83786400  | -1.01145100 | C   | -0.90562500 | 2.61639200  | -0.05319000 |
| H | -0.76626400 | 4.11102300  | -1.38072700 | H   | -1.90050500 | 2.26919100  | 0.26197500  |
| H | 0.55477600  | 4.62262400  | -0.32327800 | C   | -0.47100400 | 1.79733300  | -1.24858700 |
| C | -0.75946300 | 2.74026300  | 1.90605000  | H   | 0.44288800  | 2.24623200  | -1.65268600 |
| H | -0.99940400 | 3.82032800  | 1.86506200  | C   | -0.49872000 | 2.10234900  | 2.32470700  |
| H | 0.28413600  | 2.64354700  | 2.22072000  | H   | -1.49700200 | 1.67038000  | 2.34426700  |
| C | -1.67952800 | 2.05076700  | 2.90996600  | H   | -0.59388900 | 3.18211300  | 2.51120200  |
| H | -1.57132000 | 2.51792400  | 3.89425100  | C   | 0.40972800  | 1.48290400  | 3.37470000  |
| H | -1.36005800 | 1.00477400  | 2.99857900  | H   | 0.49701200  | 0.40922400  | 3.19041100  |
| C | -3.13244700 | 2.11196500  | 2.43633600  | H   | -0.06163900 | 1.61101400  | 4.35409100  |
| H | -3.78620000 | 1.55728600  | 3.11694600  | C   | 1.78917700  | 2.13471500  | 3.33447300  |
| H | -3.46954000 | 3.15761100  | 2.44869400  | H   | 1.70548600  | 3.19357800  | 3.61376000  |
| C | -3.25063300 | 1.56979600  | 1.01151700  | H   | 2.46408900  | 1.66255900  | 4.05393200  |
| H | -3.02741600 | 0.49453000  | 1.00339500  | C   | 2.35301000  | 2.02226200  | 1.92100700  |
| H | -4.26828700 | 1.69860700  | 0.62817000  | H   | 2.56362000  | 0.97376100  | 1.69031500  |
| C | -2.26215100 | 2.27625500  | 0.08610100  | H   | 3.29889600  | 2.56550800  | 1.82867900  |
| H | -2.32767500 | 1.85361400  | -0.92113100 | C   | 1.38940600  | 2.59981500  | 0.88989700  |
| H | -2.53822100 | 3.34492700  | 0.01006200  | H   | 1.25339900  | 3.67100500  | 1.08608000  |
| C | -0.97700700 | -0.83336200 | -0.66632000 | H   | 1.78856700  | 2.48784300  | -0.11966900 |
| F | -2.06498000 | -0.05355600 | -2.63530000 | C   | -0.98776200 | 4.11030400  | -0.30125300 |
| C | -2.07932700 | -0.80205100 | -1.52691600 | H   | -0.02377200 | 4.49669800  | -0.65264400 |
| F | -4.25399100 | -1.46678500 | -2.16634100 | H   | -1.28506400 | 4.68460200  | 0.58385700  |
| C | -3.23842200 | -1.53097700 | -1.30841100 | C   | -2.04403600 | 4.25714700  | -1.41776400 |
| F | -4.42941800 | -3.04826900 | 0.03568500  | H   | -3.02210400 | 3.96886000  | -1.01037100 |
| C | -3.33005500 | -2.34210600 | -0.18642800 | H   | -2.12506200 | 5.30826500  | -1.71165000 |
| F | -2.34536200 | -3.19179500 | 1.77380900  | C   | -1.73874300 | 3.39428800  | -2.65495500 |
| C | -2.26343500 | -2.41392700 | 0.69738400  | H   | -0.82382100 | 3.77536300  | -3.12837600 |
| F | -0.14293800 | -1.78469000 | 1.34674400  | H   | -2.54397200 | 3.52018600  | -3.38670800 |
| C | -1.11758300 | -1.67420900 | 0.44287100  | C   | -1.53098300 | 1.90065600  | -2.33847600 |
| C | 1.68747300  | -0.35204800 | -0.26216900 | H   | -1.23623700 | 1.36524500  | -3.24453800 |
| F | 2.28856600  | -1.06191800 | -2.41867700 | H   | -2.47577700 | 1.45554400  | -1.99335600 |
| C | 2.62497900  | -0.89358200 | -1.12963100 | C   | -1.29059300 | -0.45796700 | 0.04775800  |
| F | 4.76824000  | -1.78492500 | -1.59527100 | C   | -1.69386400 | -1.12292700 | -1.11423100 |
| C | 3.90109300  | -1.26246700 | -0.73015200 | F   | -1.08013800 | -0.85761500 | -2.27805100 |
| F | 5.48572000  | -1.41408000 | 1.00451900  | C   | -2.67815700 | -2.09872800 | -1.15651000 |
| C | 4.26743800  | -1.07388900 | 0.59492300  | F   | -3.01240300 | -2.68055600 | -2.30875400 |
| F | 3.72073200  | -0.33367500 | 2.76102800  | C   | -3.30423800 | -2.47984300 | 0.02040700  |
| C | 3.36255900  | -0.52270900 | 1.49224900  | F   | -4.25351400 | -3.41225100 | 0.01008900  |

|     |             |             |             |     |             |             |             |
|-----|-------------|-------------|-------------|-----|-------------|-------------|-------------|
| C   | -2.90850500 | -1.89171600 | 1.20862400  | C   | 6.48526400  | -0.53507900 | -0.78102500 |
| F   | -3.47334200 | -2.26684500 | 2.35758700  | H   | 7.56582500  | -0.46915400 | -0.86034400 |
| C   | -1.91053800 | -0.92300700 | 1.20169400  | C   | 5.67829900  | 0.37520700  | -1.45977100 |
| F   | -1.55804800 | -0.47146000 | 2.41672600  | H   | 6.12883300  | 1.15176600  | -2.06997000 |
| C   | 1.30184400  | -0.22009000 | -0.33447900 | C   | 4.29283300  | 0.28869900  | -1.36528200 |
| C   | 1.66305700  | -1.16812400 | 0.62102700  | H   | 3.67465500  | 0.99847600  | -1.90673900 |
| F   | 0.91156000  | -1.31497000 | 1.72567000  | C   | -0.76908500 | 1.26811500  | -0.29104300 |
| C   | 2.77969000  | -1.98289500 | 0.52391300  | C   | -1.78278700 | 1.40506600  | 0.65822200  |
| F   | 3.07488500  | -2.86315700 | 1.48066900  | F   | -1.95376200 | 0.45954500  | 1.59718800  |
| C   | 3.59701400  | -1.87281400 | -0.59228400 | C   | -2.63492800 | 2.49668700  | 0.73532900  |
| F   | 4.67467600  | -2.64290700 | -0.71327000 | F   | -3.57741400 | 2.56460500  | 1.67547800  |
| C   | 3.27903300  | -0.95425900 | -1.57859400 | C   | -2.49238400 | 3.53122700  | -0.17813700 |
| F   | 4.05663600  | -0.84330100 | -2.65615400 | F   | -3.29623200 | 4.58947700  | -0.12487200 |
| C   | 2.14826200  | -0.15622900 | -1.43746700 | C   | -1.49769700 | 3.45218000  | -1.13795000 |
| F   | 1.91303700  | 0.69577800  | -2.44561400 | F   | -1.34169000 | 4.44402700  | -2.01553500 |
| N13 |             |             |             | C   | -0.66603100 | 2.33817600  | -1.17575900 |
| B   | 0.14184300  | -0.07716500 | -0.35387900 | F   | 0.28307200  | 2.36961300  | -2.12452600 |
| N   | 1.52436000  | -0.02616100 | 0.66470500  | C   | -0.84496300 | -1.38143300 | -0.24002800 |
| C   | 2.19356100  | -0.82391000 | -0.46256800 | C   | -1.23938200 | -2.14841200 | 0.85118400  |
| H   | 1.94895300  | -1.86362600 | -0.21801500 | F   | -0.79052000 | -1.88268500 | 2.08900100  |
| C   | 1.24227100  | -0.32913100 | -1.54171200 | C   | -2.13251500 | -3.21107400 | 0.77459600  |
| H   | 1.02621000  | -1.07592600 | -2.30406100 | F   | -2.44599900 | -3.90684600 | 1.86943400  |
| H   | 1.60805800  | 0.56831200  | -2.03751600 | C   | -2.71181000 | -3.53474100 | -0.43941600 |
| C   | 2.07509200  | 1.36757000  | 0.73069100  | F   | -3.57463800 | -4.54380600 | -0.53127100 |
| H   | 1.91886500  | 1.84331700  | -0.24087500 | C   | -2.39414200 | -2.77579000 | -1.55473600 |
| H   | 3.15511900  | 1.27680500  | 0.89106500  | F   | -2.96358400 | -3.04912100 | -2.72931500 |
| C   | 1.47872200  | 2.20419300  | 1.85930700  | C   | -1.49105200 | -1.72999800 | -1.43118900 |
| H   | 1.99058700  | 3.17192200  | 1.84882300  | F   | -1.28539900 | -1.00986200 | -2.54569300 |
| H   | 0.41946800  | 2.40141100  | 1.67303000  | N14 |             |             |             |
| C   | 1.64229100  | 1.51187300  | 3.20968600  | B   | 0.14184300  | -0.07716500 | -0.35387900 |
| H   | 2.70768300  | 1.45279200  | 3.46866900  | N   | 1.52436000  | -0.02616100 | 0.66470500  |
| H   | 1.14861400  | 2.08875700  | 3.99674900  | C   | 2.19356100  | -0.82391000 | -0.46256800 |
| C   | 1.05820900  | 0.10447900  | 3.12163200  | H   | 1.94895200  | -1.86362600 | -0.21801500 |
| H   | 1.21194200  | -0.44928100 | 4.05324600  | C   | 1.24227000  | -0.32913100 | -1.54171200 |
| H   | -0.02046900 | 0.15408200  | 2.94580900  | H   | 1.02621000  | -1.07592600 | -2.30406100 |
| C   | 1.72132100  | -0.66962500 | 1.99189200  | H   | 1.60805800  | 0.56831200  | -2.03751600 |
| H   | 1.35520600  | -1.69292100 | 1.92716800  | C   | 2.07509200  | 1.36757000  | 0.73069100  |
| H   | 2.80775000  | -0.70501400 | 2.15736900  | H   | 1.91886500  | 1.84331700  | -0.24087500 |
| C   | 3.69293100  | -0.70550000 | -0.58627500 | H   | 3.15511900  | 1.27680500  | 0.89106500  |
| C   | 4.51374900  | -1.61834400 | 0.08345100  | C   | 1.47872200  | 2.20419300  | 1.85930700  |
| H   | 4.05759300  | -2.41111200 | 0.67200500  | H   | 1.99058800  | 3.17192200  | 1.84882300  |
| C   | 5.90042000  | -1.53544900 | -0.00968800 | H   | 0.41946800  | 2.40141100  | 1.67303000  |
| H   | 6.52174400  | -2.25608100 | 0.51256800  | C   | 1.64229100  | 1.51187300  | 3.20968500  |

|     |             |             |             |   |             |             |             |
|-----|-------------|-------------|-------------|---|-------------|-------------|-------------|
| H   | 2.70768300  | 1.45279200  | 3.46866900  | B | -0.07641400 | -0.04252900 | -0.29999300 |
| H   | 1.14861400  | 2.08875700  | 3.99674900  | C | -2.23435200 | 0.28938300  | -0.45620400 |
| C   | 1.05820900  | 0.10447900  | 3.12163200  | H | -2.20719700 | 1.38197400  | -0.44153300 |
| H   | 1.21194100  | -0.44928100 | 4.05324600  | C | -1.20944800 | -0.21467700 | -1.45987100 |
| H   | -0.02047000 | 0.15408200  | 2.94580900  | H | -1.15924600 | 0.35084800  | -2.38663200 |
| C   | 1.72132100  | -0.66962600 | 1.99189200  | H | -1.36576100 | -1.26893700 | -1.70841600 |
| H   | 1.35520500  | -1.69292100 | 1.92716800  | C | -1.69310300 | -1.52093900 | 1.22750000  |
| H   | 2.80775000  | -0.70501500 | 2.15736900  | H | -0.80679500 | -1.87503400 | 1.74910600  |
| C   | 3.69293100  | -0.70550000 | -0.58627500 | H | -1.79897900 | -2.12019700 | 0.32000000  |
| C   | 4.51374800  | -1.61834500 | 0.08345100  | C | -2.90291400 | -1.71281500 | 2.13744500  |
| H   | 4.05759200  | -2.41111200 | 0.67200500  | H | -2.75154500 | -1.26102600 | 3.12101800  |
| C   | 5.90042000  | -1.53545000 | -0.00968800 | H | -3.02746400 | -2.78815700 | 2.29401700  |
| H   | 6.52174300  | -2.25608200 | 0.51256800  | H | -3.83340400 | -1.32872500 | 1.71945100  |
| C   | 6.48526400  | -0.53508000 | -0.78102500 | C | -1.52992500 | 0.85962800  | 1.89028700  |
| H   | 7.56582500  | -0.46915500 | -0.86034400 | H | -2.57671200 | 0.85234200  | 2.21518900  |
| C   | 5.67829900  | 0.37520600  | -1.45977100 | H | -1.32775200 | 1.84395400  | 1.46016400  |
| H   | 6.12883300  | 1.15176600  | -2.06997000 | C | -0.59256200 | 0.60681600  | 3.05740500  |
| C   | 4.29283300  | 0.28869800  | -1.36528200 | H | -0.76936500 | -0.35934300 | 3.53601300  |
| H   | 3.67465500  | 0.99847600  | -1.90673900 | H | -0.75385600 | 1.38545000  | 3.80765800  |
| C   | -0.76908500 | 1.26811500  | -0.29104300 | H | 0.45210600  | 0.64028500  | 2.74784500  |
| C   | -1.78278700 | 1.40506700  | 0.65822200  | C | -3.67859500 | -0.13959700 | -0.48239500 |
| F   | -1.95376200 | 0.45954600  | 1.59718800  | C | -4.64800800 | 0.69542100  | 0.08307700  |
| C   | -2.63492800 | 2.49668800  | 0.73532900  | H | -4.34770800 | 1.65845800  | 0.48970400  |
| F   | -3.57741400 | 2.56460600  | 1.67547800  | C | -5.98324800 | 0.30720600  | 0.13090300  |
| C   | -2.49238400 | 3.53122700  | -0.17813700 | H | -6.72317400 | 0.96508400  | 0.57583000  |
| F   | -3.29623100 | 4.58947800  | -0.12487200 | C | -6.36743300 | -0.92197800 | -0.40052100 |
| C   | -1.49769600 | 3.45218000  | -1.13795000 | H | -7.40801100 | -1.22892600 | -0.36602300 |
| F   | -1.34168900 | 4.44402700  | -2.01553500 | C | -5.41522100 | -1.74725600 | -0.99389600 |
| C   | -0.66603000 | 2.33817600  | -1.17575900 | H | -5.71400300 | -2.69724600 | -1.42592200 |
| F   | 0.28307200  | 2.36961200  | -2.12452600 | C | -4.07992300 | -1.35594600 | -1.03915700 |
| C   | -0.84496400 | -1.38143300 | -0.24002800 | H | -3.34743500 | -2.00345100 | -1.51146700 |
| C   | -1.23938200 | -2.14841200 | 0.85118500  | C | 0.64519500  | 1.42846900  | -0.20518000 |
| F   | -0.79052000 | -1.88268500 | 2.08900100  | C | 0.26876900  | 2.54700700  | -0.95428500 |
| C   | -2.13251500 | -3.21107400 | 0.77459600  | F | -0.78564700 | 2.51450500  | -1.78677700 |
| F   | -2.44599900 | -3.90684600 | 1.86943400  | C | 0.91673700  | 3.77553000  | -0.90346400 |
| C   | -2.71181000 | -3.53474100 | -0.43941600 | F | 0.48636400  | 4.79450700  | -1.64787700 |
| F   | -3.57463900 | -4.54380500 | -0.53127100 | C | 2.01240400  | 3.94039700  | -0.07395300 |
| C   | -2.39414300 | -2.77579000 | -1.55473600 | F | 2.64306800  | 5.10884700  | -0.01101600 |
| F   | -2.96358400 | -3.04912100 | -2.72931500 | C | 2.43365500  | 2.86840900  | 0.69471300  |
| C   | -1.49105200 | -1.72999800 | -1.43118900 | F | 3.48079900  | 3.00260000  | 1.50828800  |
| F   | -1.28539900 | -1.00986200 | -2.54569300 | C | 1.75495600  | 1.66017800  | 0.61132400  |
| N15 |             |             |             | F | 2.23653800  | 0.69044300  | 1.40538200  |
| N   | -1.40166500 | -0.11970600 | 0.77875800  | C | 1.01753300  | -1.25134700 | -0.25294200 |
|     |             |             |             | C | 1.57369200  | -1.89959200 | 0.84559900  |

|     |             |             |             |     |             |             |             |
|-----|-------------|-------------|-------------|-----|-------------|-------------|-------------|
| F   | 1.21761100  | -1.56116900 | 2.09835500  | C   | -5.87561700 | 0.58126700  | 0.50427700  |
| C   | 2.50979300  | -2.92059100 | 0.75170000  | H   | -6.86000300 | 1.03200100  | 0.42845600  |
| F   | 2.98673300  | -3.50842800 | 1.85047000  | C   | -5.72859500 | -0.69921600 | 1.02682300  |
| C   | 2.96098500  | -3.32135900 | -0.49566600 | H   | -6.59749300 | -1.25614100 | 1.36298700  |
| F   | 3.86531200  | -4.29158400 | -0.60619200 | C   | -4.46241800 | -1.27288900 | 1.11456300  |
| C   | 2.46243900  | -2.69303500 | -1.62477400 | H   | -4.35468800 | -2.27630200 | 1.51964100  |
| F   | 2.89607800  | -3.05277600 | -2.83388600 | C   | 1.56011100  | -0.83988600 | 0.27570600  |
| C   | 1.51949000  | -1.68374200 | -1.48114400 | C   | 2.49196000  | -1.00345800 | 1.29570100  |
| F   | 1.10809300  | -1.10474100 | -2.61967500 | F   | 2.16598800  | -0.82693200 | 2.58041900  |
| N16 |             |             |             | C   | 3.82450900  | -1.33941600 | 1.06903500  |
| N   | -1.08164000 | -1.38263900 | -0.35948500 | F   | 4.66214100  | -1.49121100 | 2.09576900  |
| B   | 0.00943600  | -0.31761000 | 0.41724700  | C   | 4.28509900  | -1.51129000 | -0.22448400 |
| C   | -1.98186800 | -1.25067300 | 0.87936600  | F   | 5.55420800  | -1.84065400 | -0.45207400 |
| H   | -2.18826400 | -2.26080900 | 1.24507300  | C   | 3.40460000  | -1.32939300 | -1.28129000 |
| C   | -0.92378100 | -0.54089800 | 1.78142300  | F   | 3.82518400  | -1.47766400 | -2.53837700 |
| C   | -1.46739100 | 0.68341500  | 2.52785000  | C   | 2.09179500  | -0.98696800 | -1.00448100 |
| H   | -2.36042600 | 0.41649200  | 3.10653300  | F   | 1.28937200  | -0.78995100 | -2.07015100 |
| H   | -1.74167800 | 1.51448500  | 1.87517100  | C   | 0.11684800  | 1.24974700  | -0.08306600 |
| H   | -0.71777600 | 1.05082100  | 3.23088900  | C   | 0.74819500  | 2.08003300  | 0.85210900  |
| C   | -0.47633800 | -1.53262500 | 2.86863900  | F   | 1.17345600  | 1.55958000  | 2.01456400  |
| H   | 0.16522300  | -1.04667900 | 3.60411900  | C   | 1.01930700  | 3.42461700  | 0.66190900  |
| H   | 0.07172400  | -2.39837500 | 2.48436100  | F   | 1.61191400  | 4.14341800  | 1.61551500  |
| H   | -1.35941400 | -1.91030700 | 3.40178100  | C   | 0.68787900  | 4.01727900  | -0.54730400 |
| C   | -1.73148400 | -1.13604800 | -1.68646400 | F   | 0.93581100  | 5.30730000  | -0.75894100 |
| H   | -0.92301500 | -1.11221100 | -2.41837400 | C   | 0.11193200  | 3.23662400  | -1.53115700 |
| H   | -2.18904100 | -0.15374500 | -1.67049900 | F   | -0.18866800 | 3.77261900  | -2.71542200 |
| C   | -2.76139300 | -2.19382200 | -2.07294300 | C   | -0.13851400 | 1.88656100  | -1.29397900 |
| H   | -3.60631600 | -2.16849100 | -1.37605800 | F   | -0.64928600 | 1.23391900  | -2.35035400 |
| H   | -3.15435100 | -1.91722600 | -3.05645200 | N17 |             |             |             |
| C   | -2.14951000 | -3.58985100 | -2.09947100 | B   | -0.10628300 | 0.66971600  | 0.00328900  |
| H   | -1.39122500 | -3.64531800 | -2.89125100 | N   | -0.18949000 | 1.82343400  | 1.31671100  |
| H   | -2.90842100 | -4.34529900 | -2.32226900 | C   | -1.03252900 | 2.60944200  | 0.35353600  |
| C   | -1.49259400 | -3.86224000 | -0.75089800 | H   | -2.04554000 | 2.20378500  | 0.49106600  |
| H   | -0.94969600 | -4.81263000 | -0.75528600 | C   | -0.43178200 | 2.00037500  | -0.89359000 |
| H   | -2.26114000 | -3.94469600 | 0.02689500  | H   | 0.52286400  | 2.51622100  | -1.07248600 |
| C   | -0.48994500 | -2.76678400 | -0.40876400 | C   | -0.79967700 | 1.71154400  | 2.67016400  |
| H   | -0.00221900 | -2.95892900 | 0.54651800  | H   | -1.08875500 | 2.73088200  | 2.95630200  |
| H   | 0.28275300  | -2.73628800 | -1.18149600 | H   | -1.69196300 | 1.09338300  | 2.63787000  |
| C   | -3.32342100 | -0.58236500 | 0.68990000  | C   | 0.31841300  | 1.19777500  | 3.57287700  |
| C   | -3.48644500 | 0.71234400  | 0.17978900  | H   | 0.30087100  | 0.10932900  | 3.61731100  |
| H   | -2.61775800 | 1.28301400  | -0.13790300 | H   | 0.20614100  | 1.58399700  | 4.58743100  |
| C   | -4.74960400 | 1.28471700  | 0.08088200  | C   | 1.61503100  | 1.69573400  | 2.88938500  |
| H   | -4.85347000 | 2.28664300  | -0.32323900 | H   | 2.26459400  | 0.85644600  | 2.63456100  |

|     |             |             |             |   |             |             |             |
|-----|-------------|-------------|-------------|---|-------------|-------------|-------------|
| H   | 2.19017000  | 2.37244600  | 3.52412900  | H | 0.19569700  | -1.54852300 | 1.12700100  |
| C   | 1.14101400  | 2.42999900  | 1.62922500  | C | -0.22241900 | -2.55157600 | -0.70715800 |
| H   | 1.81815100  | 2.34290100  | 0.77939700  | H | -1.16733800 | -2.94860800 | -0.32638100 |
| H   | 0.97810100  | 3.49086400  | 1.84500900  | C | -0.23193400 | -2.20911300 | -2.21250900 |
| C   | -1.11738800 | 4.12310700  | 0.34119400  | H | -0.71344000 | -1.24372300 | -2.40568600 |
| H   | -0.12261900 | 4.56091400  | 0.19473400  | H | -0.77943400 | -2.95730400 | -2.79180500 |
| H   | -1.54659500 | 4.54550200  | 1.25719300  | C | 1.27960700  | -2.19733000 | -2.57111300 |
| C   | -2.00898200 | 4.45451100  | -0.87481500 | H | 1.60432300  | -1.24188100 | -2.99378600 |
| H   | -3.02721700 | 4.09919900  | -0.66720100 | H | 1.52360900  | -2.97389800 | -3.30262800 |
| H   | -2.07542900 | 5.54016800  | -0.99578000 | C | 0.99158400  | -3.49967100 | -0.57094000 |
| C   | -1.50982100 | 3.81537900  | -2.18293100 | C | 3.41511400  | -2.95568100 | -1.36268000 |
| H   | -0.54370500 | 4.26688100  | -2.44653800 | H | 3.91285000  | -2.99163800 | -0.38867600 |
| H   | -2.20369600 | 4.06799300  | -2.99209800 | H | 3.99608100  | -2.30274100 | -2.02291600 |
| C   | -1.32198800 | 2.28873900  | -2.09322000 | H | 3.44192700  | -3.95789900 | -1.80449700 |
| H   | -0.88725100 | 1.90775500  | -3.02114000 | C | 1.34776100  | -3.87677400 | 0.87099000  |
| H   | -2.29878600 | 1.79987300  | -1.96968800 | H | 1.73369700  | -3.04090900 | 1.45546000  |
| C   | -1.23610900 | -0.50409500 | 0.00596900  | H | 2.12725400  | -4.64649100 | 0.87215700  |
| C   | -1.60602700 | -0.98370400 | -1.25347200 | H | 0.47452900  | -4.29498500 | 1.38598000  |
| F   | -1.04261700 | -0.46391500 | -2.35425800 | C | 0.80859600  | -4.80866200 | -1.34603100 |
| C   | -2.49921300 | -2.02389700 | -1.46213000 | H | 1.73500600  | -5.39219600 | -1.34768000 |
| F   | -2.80883500 | -2.42039900 | -2.69698300 | H | 0.50176800  | -4.67108300 | -2.38461000 |
| C   | -3.05743800 | -2.66654500 | -0.36776600 | H | 0.04391900  | -5.42146100 | -0.85503300 |
| F   | -3.92033600 | -3.66499700 | -0.53828600 | N | 2.75590000  | -0.96385700 | 0.69631300  |
| C   | -2.68412000 | -2.26965900 | 0.90434400  | C | 3.85237300  | -0.13944600 | 0.18209600  |
| F   | -3.18138400 | -2.89908600 | 1.97024800  | H | 3.49544200  | 0.89898700  | 0.01193500  |
| C   | -1.77877100 | -1.22615000 | 1.06395800  | H | 4.15871600  | -0.53001000 | -0.79094800 |
| F   | -1.43729800 | -0.96888900 | 2.33829300  | C | 5.04280100  | -0.11547800 | 1.13314100  |
| C   | 1.34279600  | -0.03030300 | -0.18270100 | H | 5.83665900  | 0.50648600  | 0.70649800  |
| C   | 2.10958700  | 0.12310100  | -1.33464000 | H | 5.43619800  | -1.13487800 | 1.22933300  |
| F   | 1.70558700  | 0.91712300  | -2.33596900 | C | 4.61473800  | 0.40366100  | 2.50301600  |
| C   | 3.31658600  | -0.53738300 | -1.53697700 | H | 4.32832300  | 1.46082900  | 2.41486600  |
| F   | 4.01451700  | -0.34831400 | -2.65735100 | H | 5.44065400  | 0.35261200  | 3.21960900  |
| C   | 3.79436800  | -1.40336000 | -0.56637700 | C | 3.41548500  | -0.40061700 | 2.99686300  |
| F   | 4.94918000  | -2.04005100 | -0.74423000 | H | 3.71918200  | -1.43929800 | 3.17783000  |
| C   | 3.05335500  | -1.60957800 | 0.58848400  | H | 3.03465300  | 0.00262800  | 3.94109400  |
| F   | 3.49610200  | -2.44991500 | 1.52475800  | C | 2.28831800  | -0.40660200 | 1.96525600  |
| C   | 1.85199400  | -0.93481400 | 0.74342900  | H | 1.47382500  | -1.01390300 | 2.36520100  |
| F   | 1.15316400  | -1.19072100 | 1.86298300  | H | 1.90261400  | 0.62546000  | 1.84548800  |
| N18 |             |             |             | B | -0.64044200 | -0.02645100 | -0.03787700 |
| C   | 1.98081900  | -2.48325900 | -1.22314200 | C | -0.00909300 | 1.41195100  | -0.23196300 |
| C   | 1.75985500  | -1.17256300 | -0.37439900 | F | -0.44214600 | 1.92692100  | 2.02329500  |
| H   | 1.85138300  | -0.32525000 | -1.07076000 | C | 0.05250700  | 2.29865500  | 0.83298700  |
| C   | 0.26586700  | -1.29684200 | 0.05923600  | F | 0.71518600  | 4.35726600  | 1.79120200  |
|     |             |             |             | C | 0.65587800  | 3.54457100  | 0.73874400  |

|     |             |             |             |     |             |             |             |
|-----|-------------|-------------|-------------|-----|-------------|-------------|-------------|
| F   | 1.77860100  | 5.13036700  | -0.58805700 | C   | -2.24009900 | 1.28636300  | -1.65933200 |
| C   | 1.19928200  | 3.93996800  | -0.47546700 | H   | -1.22744500 | 0.99207300  | -1.94519700 |
| F   | 1.66395200  | 3.46601900  | -2.73552700 | H   | -2.19346500 | 1.90161400  | -0.75590100 |
| C   | 1.14494800  | 3.08687800  | -1.57045500 | H   | -2.64684700 | 1.92218700  | -2.45267600 |
| F   | 0.50154400  | 1.04244100  | -2.50255600 | C   | -4.51589800 | 0.48767900  | -1.04562900 |
| C   | 0.54270200  | 1.84589100  | -1.42874300 | H   | -4.48409700 | 0.96939300  | -0.06458900 |
| C   | -2.19837900 | -0.11938600 | 0.15259600  | H   | -5.23262300 | -0.33451500 | -0.99486300 |
| F   | -2.06692700 | -1.95981700 | 1.64901400  | H   | -4.91200100 | 1.22458700  | -1.75180300 |
| C   | -2.80588800 | -1.07632700 | 0.96989500  | C   | -4.13735100 | -2.74651500 | 0.06281500  |
| F   | -4.70973500 | -2.07373100 | 1.95119100  | H   | -4.08134300 | -2.50490200 | 1.12721100  |
| C   | -4.17767200 | -1.15374200 | 1.15105700  | H   | -4.30273700 | -3.82662800 | -0.00675100 |
| F   | -6.31580500 | -0.32721900 | 0.63673600  | H   | -5.01886100 | -2.25256800 | -0.35222000 |
| C   | -5.00137200 | -0.25798300 | 0.48368400  | C   | -1.71226000 | -3.28461100 | -0.13011700 |
| F   | -5.23790100 | 1.55893100  | -0.99238800 | H   | -0.75318600 | -2.95836900 | -0.53303900 |
| C   | -4.44750200 | 0.70683000  | -0.34570700 | H   | -1.89293700 | -4.31425900 | -0.45812900 |
| F   | -2.59392100 | 1.70270500  | -1.31367600 | H   | -1.64827200 | -3.29999200 | 0.95746400  |
| C   | -3.06944300 | 0.76497600  | -0.49007800 | C   | 2.12336600  | -0.50437300 | 0.14228000  |
| N19 |             |             |             | C   | 2.36054800  | -1.84765500 | -0.16757900 |
| B   | 0.73300500  | -0.00297600 | 0.70732200  | F   | 1.40062900  | -2.76263200 | -0.02756300 |
| C   | -0.07602500 | -0.91786600 | 1.67632000  | C   | 3.57590400  | -2.31840100 | -0.64491300 |
| C   | 0.70888100  | -1.57476700 | 2.64070700  | F   | 3.73600700  | -3.60698300 | -0.93717700 |
| H   | 1.79234300  | -1.53615200 | 2.55844000  | C   | 4.63100500  | -1.43479100 | -0.80806900 |
| C   | 0.14936500  | -2.23706100 | 3.72927400  | F   | 5.80261800  | -1.86729300 | -1.25285800 |
| H   | 0.78855200  | -2.71867600 | 4.46223900  | C   | 4.45527800  | -0.09355000 | -0.49956400 |
| C   | -1.23160900 | -2.26018400 | 3.86820500  | F   | 5.46895600  | 0.75740400  | -0.64022000 |
| H   | -1.69231100 | -2.75638700 | 4.71690800  | C   | 3.22303600  | 0.34235900  | -0.03930400 |
| C   | -2.03040900 | -1.65489900 | 2.90031400  | F   | 3.13852600  | 1.64420700  | 0.25007700  |
| H   | -3.11153300 | -1.69950700 | 3.00212300  | C   | 0.32815500  | 1.50512400  | 0.47732800  |
| C   | -1.48421400 | -1.00745900 | 1.79275200  | C   | -0.34730800 | 2.25255700  | 1.44522600  |
| C   | -2.45303400 | -0.40978700 | 0.78618000  | F   | -0.69870400 | 1.70858700  | 2.61167700  |
| H   | -2.23413800 | 0.65713700  | 0.71662200  | C   | -0.69277200 | 3.58603500  | 1.26773900  |
| H   | -3.45480200 | -0.47459100 | 1.23575800  | F   | -1.32851200 | 4.25712000  | 2.22593600  |
| N   | -2.43488500 | -0.94177600 | -0.58980000 | C   | -0.36108300 | 4.22373200  | 0.08200800  |
| C   | -2.83672800 | -2.39099900 | -0.68105700 | F   | -0.68651400 | 5.49570900  | -0.10225600 |
| C   | -2.97474700 | -2.82109900 | -2.15440400 | C   | 0.31324600  | 3.52460700  | -0.91060500 |
| H   | -1.97221700 | -2.83230600 | -2.60282300 | F   | 0.62027500  | 4.12777000  | -2.05676200 |
| H   | -3.33906600 | -3.85379900 | -2.16179300 | C   | 0.65044500  | 2.20075500  | -0.69016900 |
| C   | -3.85858700 | -1.91180300 | -2.98414900 | F   | 1.26657000  | 1.56973900  | -1.69506700 |
| H   | -4.88341200 | -1.88929700 | -2.59420500 |     |             |             |             |
| H   | -3.91938400 | -2.27255800 | -4.01606900 | N20 |             |             |             |
| C   | -3.22824700 | -0.53473800 | -2.93750200 | B   | 1.09144200  | 0.08433300  | 0.80837400  |
| H   | -3.78642200 | 0.18731400  | -3.54314200 | C   | -0.04148700 | 0.17664500  | 1.88322200  |
| H   | -2.21853400 | -0.60077100 | -3.36380300 | C   | 0.14408300  | 1.08301200  | 2.93936500  |
| C   | -3.11798200 | 0.03561800  | -1.51372900 | H   | 1.03861000  | 1.69669200  | 2.97363700  |

|   |             |             |             |     |             |             |             |
|---|-------------|-------------|-------------|-----|-------------|-------------|-------------|
| C | -0.77518100 | 1.18928600  | 3.98034700  | F   | 0.30195600  | 1.12658200  | -1.77176500 |
| H | -0.58805200 | 1.87617700  | 4.79949700  | C   | 1.47739800  | 3.13478500  | -1.58745900 |
| C | -1.94068200 | 0.43412000  | 3.94465700  | F   | 0.97143200  | 3.54544800  | -2.74880400 |
| H | -2.68035000 | 0.52701800  | 4.73380900  | C   | 2.36313000  | 3.94657600  | -0.89098100 |
| C | -2.16682600 | -0.43441100 | 2.87756400  | F   | 2.71119700  | 5.13000600  | -1.38525300 |
| H | -3.08998200 | -1.00665900 | 2.83230800  | C   | 2.88932900  | 3.51292400  | 0.31659300  |
| C | -1.22663700 | -0.59291400 | 1.86204000  | F   | 3.75672500  | 4.27526400  | 0.97890600  |
| C | -1.51655000 | -1.57264200 | 0.74641700  | C   | 2.50275400  | 2.27725200  | 0.81700100  |
| H | -2.31372700 | -2.25116300 | 1.08914500  | F   | 3.04010100  | 1.88703700  | 1.98538200  |
| H | -0.63123600 | -2.18572900 | 0.57165700  | C   | 1.82817800  | -1.24446600 | 0.42248000  |
| N | -1.87921600 | -0.91334800 | -0.52575600 | C   | 1.83376700  | -2.36140400 | 1.26829200  |
| C | -1.82519500 | -1.83275600 | -1.70117300 | F   | 1.17329100  | -2.34130000 | 2.42472300  |
| C | -2.74417600 | -3.04082400 | -1.45427700 | C   | 2.50101900  | -3.53823100 | 0.96420400  |
| H | -2.79166700 | -3.65303800 | -2.36098700 | F   | 2.48292000  | -4.56924200 | 1.80433900  |
| H | -2.28286900 | -3.67135700 | -0.68608300 | C   | 3.19808300  | -3.63482500 | -0.23256800 |
| C | -4.16448500 | -2.62957300 | -1.01777800 | F   | 3.83222600  | -4.75567200 | -0.53996600 |
| C | -4.31516100 | -1.19574600 | -0.53991500 | C   | 3.22010500  | -2.55893900 | -1.10849600 |
| C | -5.59697400 | -0.68228500 | -0.34207600 | F   | 3.87106800  | -2.65655700 | -2.26405100 |
| C | -5.77905900 | 0.65229400  | -0.00170100 | C   | 2.55454300  | -1.39287400 | -0.76490000 |
| H | -6.77905100 | 1.04355600  | 0.15900100  | F   | 2.57992700  | -0.41761300 | -1.67399200 |
| C | -4.67693600 | 1.49444900  | 0.09150100  | H   | -6.45579100 | -1.33756200 | -0.47022800 |
| H | -4.82682800 | 2.54844400  | 0.30962800  | H   | -4.85938500 | -2.75470200 | -1.85565300 |
| C | -3.37904600 | 1.01820400  | -0.11275500 | H   | -4.52220800 | -3.31142300 | -0.23718700 |
| C | -3.20548000 | -0.34984400 | -0.38601200 |     |             |             |             |
| C | -2.21295100 | 1.98800400  | -0.13942700 | N21 |             |             |             |
| H | -1.30481700 | 1.38812200  | -0.10912400 | B   | 0.22434800  | 0.85869700  | 0.82856000  |
| C | -2.19613600 | 2.94608700  | 1.05141800  | C   | -0.33344900 | 0.15957700  | 2.11260100  |
| H | -1.25613100 | 3.50963100  | 1.06724300  | C   | -0.98232100 | 0.95757900  | 3.06458700  |
| H | -2.28508500 | 2.40455000  | 1.99692200  | H   | -1.11492200 | 2.01928300  | 2.86831400  |
| H | -3.01135300 | 3.67641300  | 0.99717400  | C   | -1.45668400 | 0.42841000  | 4.26263500  |
| C | -2.21945800 | 2.76152900  | -1.46340400 | H   | -1.94735500 | 1.07210900  | 4.98575600  |
| H | -1.35902500 | 3.43674800  | -1.52904100 | C   | -1.31558700 | -0.93132300 | 4.51134400  |
| H | -3.12817600 | 3.36805100  | -1.55159900 | H   | -1.70021200 | -1.36283100 | 5.43032500  |
| H | -2.18372700 | 2.08253700  | -2.31987300 | C   | -0.69947900 | -1.74782300 | 3.56410400  |
| C | -0.38936000 | -2.29760100 | -1.94900300 | H   | -0.61832700 | -2.81688000 | 3.74379000  |
| H | 0.01681400  | -2.90663200 | -1.13533600 | C   | -0.19935200 | -1.21706100 | 2.37859000  |
| H | 0.25874100  | -1.42990600 | -2.10385000 | C   | 0.47787700  | -2.14378400 | 1.38787700  |
| H | -0.35883200 | -2.91128600 | -2.85459700 | H   | 0.23098700  | -3.18367100 | 1.64395800  |
| C | -2.25636700 | -1.04719500 | -2.94545900 | H   | 1.56206200  | -2.03498400 | 1.51339600  |
| H | -1.62706700 | -0.15784700 | -3.05081000 | N   | 0.17376000  | -1.85120600 | -0.02365600 |
| H | -3.29971600 | -0.72602000 | -2.90825300 | C   | 1.30316200  | -2.08778300 | -0.93129900 |
| H | -2.12638000 | -1.66968400 | -3.83587200 | C   | 1.38447500  | -3.53170300 | -1.39957400 |
| C | 1.59887400  | 1.44998900  | 0.16809300  | H   | 1.41140600  | -4.20183700 | -0.52904400 |
| C | 1.12638100  | 1.90325200  | -1.05727100 | H   | 2.30442100  | -3.69970400 | -1.96916800 |



|   |             |             |             |    |             |             |             |
|---|-------------|-------------|-------------|----|-------------|-------------|-------------|
| C | 0.16506000  | -3.84275300 | -2.26312500 | P1 |             |             |             |
| H | 0.28884900  | -3.29568200 | -3.20970100 | B  | 0.07361600  | 0.79876900  | 0.67292800  |
| C | -1.09496400 | -3.32729400 | -1.58007500 | C  | -0.73328000 | -0.71546400 | 2.68418300  |
| C | -2.35116500 | -3.76659000 | -2.01171400 | C  | -0.23402300 | 0.55804000  | 2.26183500  |
| H | -2.40637900 | -4.44549800 | -2.85730400 | C  | -0.98637900 | -1.72049100 | 1.71284800  |
| C | -3.52943500 | -3.37506500 | -1.39187000 | C  | -1.05141600 | -0.98675800 | 4.04286100  |
| H | -4.48520600 | -3.73462400 | -1.76311000 | C  | -1.61510300 | -2.89716700 | 2.05171600  |
| C | -3.48472200 | -2.52400300 | -0.28699400 | H  | -1.88109600 | -3.62078900 | 1.28563800  |
| C | -2.24251400 | -2.07695500 | 0.15085600  | C  | -0.05039900 | 1.50556100  | 3.24690100  |
| H | -2.20157800 | -1.40386300 | 0.99664300  | H  | 0.32232800  | 2.49038200  | 2.99620100  |
| C | -1.05153000 | -2.42769800 | -0.49443200 | C  | -0.81698100 | 0.02441300  | 5.01111800  |
| C | 0.10015300  | -5.33699100 | -2.58588200 | H  | -1.04669300 | -0.17670200 | 6.05373800  |
| H | 1.06246700  | -5.67489300 | -2.98330600 | C  | -1.63087400 | -2.23725300 | 4.37478400  |
| H | -0.66079800 | -5.57291200 | -3.33321300 | H  | -1.87061300 | -2.43941000 | 5.41537200  |
| H | -0.11916400 | -5.91789600 | -1.68423100 | C  | -1.92229800 | -3.16516900 | 3.40273800  |
| C | -4.73771800 | -2.03446600 | 0.39067500  | H  | -2.39859700 | -4.10348500 | 3.66702600  |
| H | -4.63044500 | -2.04514100 | 1.47911300  | C  | -0.32590900 | 1.23817500  | 4.61343000  |
| H | -5.60246200 | -2.64731500 | 0.12438900  | H  | -0.15227400 | 2.02062700  | 5.34587400  |
| H | -4.95474000 | -1.00141000 | 0.09715500  | C  | -0.66250600 | 2.13045600  | 0.07012400  |
| C | 1.74301100  | 0.73011200  | 0.41803800  | C  | -1.70020700 | 2.19791900  | -0.85186300 |
| C | 2.73880700  | 0.38406300  | 1.33284400  | C  | -0.19813700 | 3.38517300  | 0.47351500  |
| F | 2.45121100  | 0.19539500  | 2.62302500  | C  | -2.29287000 | 3.38313500  | -1.27768300 |
| C | 4.06977900  | 0.20897700  | 0.97481200  | C  | -0.75156200 | 4.59159900  | 0.07955200  |
| F | 4.98135800  | -0.11692800 | 1.88873400  | C  | -1.82389400 | 4.59253100  | -0.80056100 |
| C | 4.44853300  | 0.38474700  | -0.34725400 | C  | 1.67077800  | 0.78027100  | 0.31617500  |
| F | 5.71511100  | 0.22068500  | -0.70615600 | C  | 2.30171600  | 1.58385900  | -0.63644300 |
| C | 3.49514000  | 0.73158400  | -1.29485100 | C  | 2.53182800  | -0.12467200 | 0.93890700  |
| F | 3.85017000  | 0.88185000  | -2.56922600 | C  | 3.87293800  | -0.27851900 | 0.62252700  |
| C | 2.17836600  | 0.89465300  | -0.89939100 | C  | 3.64821900  | 1.48513600  | -0.96662700 |
| F | 1.29925600  | 1.16885100  | -1.86879800 | C  | 4.44195800  | 0.54309500  | -0.33620400 |
| C | -0.68721300 | 1.92566800  | 0.09551600  | P  | -0.64668900 | -1.15121600 | 0.02286200  |
| C | -0.17554900 | 3.09561300  | -0.47797600 | C  | 0.81890600  | -1.91065600 | -0.78185400 |
| F | 1.13262900  | 3.36467500  | -0.42790100 | C  | 1.63166400  | -2.91938500 | -0.22565000 |
| C | -0.96317200 | 4.04959400  | -1.10220500 | C  | 1.23483400  | -1.23974300 | -1.95573400 |
| F | -0.41755600 | 5.14553200  | -1.62578800 | C  | 2.88059600  | -3.16058100 | -0.80521200 |
| C | -2.33540100 | 3.85790000  | -1.17436500 | C  | 2.48429500  | -1.52708900 | -2.49911800 |
| F | -3.10315900 | 4.75726700  | -1.77439700 | C  | 3.34288600  | -2.45504300 | -1.91214300 |
| C | -2.89722800 | 2.72381800  | -0.61010300 | H  | 3.51947900  | -3.91821600 | -0.35837900 |
| F | -4.21386200 | 2.53315200  | -0.66835000 | H  | 2.80282700  | -0.99069700 | -3.39017000 |
| C | -2.07839700 | 1.79789500  | 0.02117500  | C  | -2.21625400 | -1.65796400 | -0.82477400 |
| F | -2.70452500 | 0.74658200  | 0.55158400  | C  | -2.30036000 | -2.65388300 | -1.82654000 |
| H | 2.21992400  | -1.78308000 | -0.41996800 | C  | -3.40654500 | -1.06187700 | -0.34007800 |
| H | 1.17680100  | -1.43114700 | -1.80279800 | C  | -3.55781600 | -2.95767400 | -2.36098800 |
|   |             |             |             | C  | -4.62931100 | -1.41174700 | -0.90627300 |

|    |             |             |             |   |             |             |             |
|----|-------------|-------------|-------------|---|-------------|-------------|-------------|
| C  | -4.72913000 | -2.34520400 | -1.93349200 | C | -1.73500100 | 3.51123300  | -1.12825400 |
| H  | -3.61498100 | -3.71730500 | -3.13653600 | H | -2.99786700 | 2.05001100  | -0.19936200 |
| H  | -5.53081500 | -0.93584400 | -0.52650500 | H | 1.63884300  | 3.32811400  | -1.34191800 |
| C  | 1.24597600  | -3.77957300 | 0.95106200  | H | -0.24653000 | 4.79094700  | -2.01545000 |
| H  | 1.17819500  | -3.20712500 | 1.87768100  | H | -2.57251500 | 4.13748600  | -1.42129700 |
| H  | 0.28181800  | -4.26972500 | 0.79271000  | B | 1.67896900  | 1.06319000  | 0.05559000  |
| H  | 1.99426700  | -4.56223600 | 1.09176700  | P | -1.21324300 | -0.05229200 | 0.93361300  |
| C  | 4.74376600  | -2.64577500 | -2.42473300 | C | -3.02882000 | -0.29768100 | 0.68766000  |
| H  | 5.41601400  | -1.92502200 | -1.94485400 | C | -3.61479500 | -0.84674800 | -0.45819500 |
| H  | 5.12001400  | -3.64711900 | -2.20253100 | C | -3.85837100 | 0.10451100  | 1.74107000  |
| H  | 4.80263100  | -2.48258500 | -3.50366200 | C | -4.99716400 | -0.98412300 | -0.54794400 |
| C  | 0.36960500  | -0.21502000 | -2.64877500 | H | -2.98909400 | -1.17400200 | -1.28353100 |
| H  | -0.64644800 | -0.58194000 | -2.82523200 | C | -5.24249500 | -0.02100400 | 1.64734300  |
| H  | 0.28110800  | 0.71067500  | -2.07218900 | H | -3.41359400 | 0.51862000  | 2.64285900  |
| H  | 0.80347800  | 0.04870500  | -3.61559700 | C | -5.81364800 | -0.56858200 | 0.50213100  |
| C  | -1.15045000 | -3.48180200 | -2.35625600 | H | -5.43836400 | -1.41625000 | -1.44105800 |
| H  | -0.45386900 | -2.90362600 | -2.96820600 | H | -5.87185100 | 0.29885400  | 2.47213400  |
| H  | -0.56836900 | -3.94294400 | -1.55578700 | H | -6.89151100 | -0.67686000 | 0.42919100  |
| H  | -1.54884600 | -4.28436100 | -2.98008300 | C | -0.51156200 | -1.30881900 | -0.22592900 |
| C  | -6.05869300 | -2.67327200 | -2.55653100 | C | -0.11092200 | -2.53140000 | 0.32487700  |
| H  | -6.84492800 | -2.73787500 | -1.79961500 | C | -0.37103500 | -1.11539300 | -1.60582100 |
| H  | -6.35337300 | -1.89459200 | -3.26789800 | C | 0.39768600  | -3.54537400 | -0.48391100 |
| H  | -6.02174500 | -3.62164500 | -3.09735100 | H | -0.19247600 | -2.68510300 | 1.39833000  |
| C  | -3.46167700 | -0.08268000 | 0.80819200  | C | 0.13830600  | -2.12902600 | -2.41591500 |
| H  | -3.66346700 | -0.61136400 | 1.74676600  | H | -0.66125300 | -0.16721300 | -2.05088700 |
| H  | -2.54784900 | 0.49131400  | 0.95682400  | C | 0.52027800  | -3.34653100 | -1.85774400 |
| H  | -4.27278200 | 0.63148100  | 0.64581000  | H | 0.70345900  | -4.48829500 | -0.04034500 |
| F  | 0.90300700  | 3.47774900  | 1.24072500  | H | 0.23856000  | -1.96368500 | -3.48435900 |
| F  | -0.24671800 | 5.74655300  | 0.51471200  | H | 0.91956300  | -4.13394800 | -2.48953900 |
| F  | -2.37417600 | 5.73817100  | -1.19479200 | O | 2.84105100  | 1.11706000  | -0.67162600 |
| F  | -3.29995000 | 3.35450100  | -2.15213600 | O | 1.78408100  | 0.27745600  | 1.17270600  |
| F  | -2.18819400 | 1.08559900  | -1.42249600 | C | 3.17977600  | -0.07729400 | 1.31496700  |
| F  | 2.05281200  | -0.98354700 | 1.85116200  | C | 3.26888800  | -1.48478400 | 1.87871300  |
| F  | 4.60635700  | -1.22614600 | 1.20773000  | H | 4.30988800  | -1.82247300 | 1.91180900  |
| F  | 5.72403400  | 0.40119900  | -0.67078500 | H | 2.87405300  | -1.49672000 | 2.89830900  |
| F  | 4.17326300  | 2.27813500  | -1.90246400 | H | 2.68572000  | -2.18636400 | 1.27879300  |
| F  | 1.62106500  | 2.49294100  | -1.35476600 | C | 3.79563800  | 0.93260300  | 2.27899900  |
|    |             |             |             | H | 3.74892300  | 1.94585700  | 1.86842800  |
| P2 |             |             |             | H | 3.23215900  | 0.91898100  | 3.21530700  |
| C  | -1.97421000 | 2.32858800  | -0.42922100 | H | 4.83952700  | 0.69147000  | 2.49867200  |
| C  | -0.91819700 | 1.50331400  | -0.03416300 | C | 3.70617900  | 0.08076700  | -0.14647200 |
| C  | 0.40753700  | 1.87942000  | -0.34977600 | C | 5.15021000  | 0.53514700  | -0.26324000 |
| C  | 0.62032500  | 3.05548200  | -1.07759200 | H | 5.81984400  | -0.18790400 | 0.21347600  |
| C  | -0.43630900 | 3.87725500  | -1.46085400 | H | 5.42777700  | 0.60838900  | -1.31840500 |

|    |             |             |             |    |             |             |             |
|----|-------------|-------------|-------------|----|-------------|-------------|-------------|
| H  | 5.30216900  | 1.51251900  | 0.19877900  | C  | 1.69028249  | 1.26386201  | -2.21401018 |
| C  | 3.45541400  | -1.16476000 | -0.99047600 | C  | 0.75584173  | 0.71316436  | -3.10166438 |
| H  | 2.42233300  | -1.50869600 | -0.87648900 | C  | 2.83736586  | 1.88651003  | -2.70968222 |
| H  | 3.62022900  | -0.92112400 | -2.04345300 | C  | 0.98341579  | 0.77287317  | -4.47156684 |
| H  | 4.12851100  | -1.98111600 | -0.71230900 | H  | -0.15551278 | 0.25510272  | -2.72601301 |
|    |             |             |             | C  | 3.05651292  | 1.94214138  | -4.08434498 |
| P3 |             |             |             | H  | 3.55731135  | 2.33454134  | -2.03319119 |
| C  | -0.34869266 | 1.74286393  | -0.16544390 | C  | 2.13582743  | 1.38207156  | -4.96438164 |
| C  | -0.89691420 | 0.52962913  | 0.10313607  | H  | 0.25663024  | 0.34623106  | -5.15501811 |
| C  | -0.92541673 | 3.08556118  | -0.37083440 | H  | 3.95054961  | 2.42554379  | -4.46471997 |
| C  | -0.49117719 | 3.88166287  | -1.43993013 | H  | 2.31174628  | 1.42532623  | -6.03442630 |
| C  | -1.88842418 | 3.59699696  | 0.50851295  | C  | 0.49110457  | -1.76067973 | -0.83129044 |
| C  | -1.03683138 | 5.14416579  | -1.64417283 | C  | 1.64819403  | -2.06402549 | -1.54337075 |
| H  | 0.26502561  | 3.50412782  | -2.12207219 | C  | -0.55882404 | -2.65510057 | -1.00278482 |
| C  | -2.42722919 | 4.86313166  | 0.30246971  | C  | 1.74823345  | -3.14871874 | -2.40488040 |
| H  | -2.18973363 | 3.01546519  | 1.37173922  | C  | -0.50262517 | -3.75265859 | -1.84898016 |
| C  | -2.00979566 | 5.63668705  | -0.77697139 | C  | 0.66410215  | -3.99888103 | -2.55829798 |
| H  | -0.70134725 | 5.74491570  | -2.48351112 | C  | 0.79363118  | -0.98093343 | 1.69737736  |
| H  | -3.17004617 | 5.24755650  | 0.99414125  | C  | 2.12048780  | -1.16867936 | 2.06967055  |
| H  | -2.43379098 | 6.62306259  | -0.93595649 | C  | -0.14218321 | -1.31291952 | 2.67000327  |
| C  | -2.36753930 | 0.31611219  | 0.16669897  | C  | 2.51015904  | -1.60081859 | 3.32900937  |
| C  | -3.13879729 | 0.60629888  | 1.28586531  | C  | 0.20011185  | -1.75294246 | 3.94162442  |
| C  | -3.03575245 | -0.20202756 | -0.93700459 | C  | 1.53851640  | -1.89004396 | 4.27536022  |
| C  | -4.51187461 | 0.40813022  | 1.30715038  | F  | 2.87712725  | -3.38447448 | -3.07383864 |
| C  | -4.40451443 | -0.41542345 | -0.94485016 | F  | 2.74319616  | -1.29328760 | -1.43153447 |
| C  | -5.14638394 | -0.10788400 | 0.18724016  | F  | -1.69595348 | -2.47869404 | -0.31175147 |
| F  | -2.34196904 | -0.52161341 | -2.03654061 | F  | -1.54475026 | -4.57344804 | -1.97753609 |
| F  | -5.00817206 | -0.91156955 | -2.02268961 | F  | 0.74374685  | -5.04653658 | -3.37498196 |
| F  | -6.46147609 | -0.30245651 | 0.19622211  | F  | -1.45184807 | -1.24996675 | 2.39160153  |
| F  | -5.22021518 | 0.70707982  | 2.39442401  | F  | -0.74199805 | -2.05501604 | 4.83470316  |
| F  | -2.56517544 | 1.11012424  | 2.38390571  | F  | 1.88859091  | -2.31151492 | 5.48804798  |
| B  | 0.37052849  | -0.52472280 | 0.20376212  | F  | 3.79974577  | -1.74977740 | 3.63318508  |
| P  | 1.32875921  | 1.14503807  | -0.42963345 | F  | 3.09942433  | -0.94853261 | 1.17738006  |
| C  | 2.59330301  | 2.06229327  | 0.48480566  |    |             |             |             |
| C  | 3.93463258  | 1.66000416  | 0.43438099  | P4 |             |             |             |
| C  | 2.21498666  | 3.14616667  | 1.28249998  | C  | -0.65593000 | -0.59541900 | 2.08463300  |
| C  | 4.88904391  | 2.35121347  | 1.17081179  | H  | -1.27456000 | 0.04307200  | 2.72149700  |
| H  | 4.22527254  | 0.80545990  | -0.16948906 | H  | -0.73265000 | -1.62449200 | 2.43697800  |
| C  | 3.17805339  | 3.83005135  | 2.02022950  | C  | 0.82272300  | -0.17735700 | 2.11139800  |
| H  | 1.17560916  | 3.45794861  | 1.32769171  | H  | 0.94005200  | 0.85838300  | 1.77837400  |
| C  | 4.51094746  | 3.43495811  | 1.96291062  | H  | 1.18869500  | -0.18698300 | 3.15222400  |
| H  | 5.92758504  | 2.03942916  | 1.13284128  | P  | -1.13118000 | -0.52704800 | 0.27622700  |
| H  | 2.88381580  | 4.67230738  | 2.63750913  | B  | 1.70746500  | -1.21120600 | 1.32309400  |
| H  | 5.25972389  | 3.96930234  | 2.53902446  | C  | 3.09018700  | -0.91277100 | 0.65572000  |

|   |             |             |             |    |             |             |             |
|---|-------------|-------------|-------------|----|-------------|-------------|-------------|
| C | 3.74252000  | -1.90113300 | -0.09084300 | H  | -2.98508100 | -0.26424800 | -3.37303100 |
| C | 3.76371500  | 0.30869600  | 0.76030000  | F  | 5.55244700  | -2.65600200 | -1.41668900 |
| C | 4.96984400  | -1.69420300 | -0.70641500 | F  | 6.76588800  | -0.24662900 | -1.15332400 |
| C | 4.99142300  | 0.55103800  | 0.16421000  | F  | 5.59597000  | 1.72957100  | 0.28827700  |
| C | 5.59448900  | -0.46139700 | -0.57253700 | F  | 3.22621800  | 1.31726300  | 1.45018000  |
| C | -2.84382400 | -1.16260100 | -0.05583800 | F  | 3.19101600  | -3.10110400 | -0.25082600 |
| C | -3.34208500 | -0.87071600 | -1.34708900 | H  | 1.35193200  | -2.34883700 | 1.29882700  |
| C | -3.63579600 | -1.94998300 | 0.80854800  |    |             |             |             |
| C | -4.62106400 | -1.29715500 | -1.70975500 | P5 |             |             |             |
| C | -4.90463700 | -2.35835900 | 0.39754400  | P  | 0.06911100  | 1.22715700  | 0.73606700  |
| C | -5.42712100 | -2.03350300 | -0.85067500 | B  | 0.41902300  | -0.89694300 | 1.08446200  |
| H | -4.99018300 | -1.04684800 | -2.70226300 | C  | 0.52138100  | 1.14383200  | 2.52037400  |
| H | -5.50634600 | -2.95224800 | 1.08247900  | C  | 0.38123500  | -0.39224900 | 2.65051600  |
| C | -1.35908600 | 1.31287500  | 0.10399600  | C  | 0.90323600  | 2.65006200  | -0.08464900 |
| C | -2.45728500 | 2.01201800  | 0.64958100  | C  | 1.24847300  | 5.04307900  | -0.23743500 |
| C | -0.39523700 | 2.03016700  | -0.64101000 | C  | 2.18036800  | 4.87520700  | -1.26467000 |
| C | -2.56711400 | 3.38859600  | 0.43456400  | C  | 2.45813100  | 3.58269000  | -1.68405900 |
| C | -0.54873300 | 3.40297200  | -0.83043600 | C  | 1.84147100  | 2.46138900  | -1.11532900 |
| C | -1.63244100 | 4.10232500  | -0.30645100 | C  | -1.74215700 | 1.36156000  | 0.40242500  |
| H | -3.41726100 | 3.91575100  | 0.86283000  | C  | -2.75525700 | 1.42266500  | 1.38650200  |
| H | 0.20218500  | 3.94061100  | -1.40557300 | C  | -4.08460500 | 1.22450500  | 0.99918200  |
| C | -3.56868400 | 1.35948500  | 1.43827300  | C  | -4.45691000 | 0.98448300  | -0.31816900 |
| H | -4.32141200 | 0.92756200  | 0.77041700  | C  | -3.45356300 | 0.98952200  | -1.28320200 |
| H | -3.21408500 | 0.54987000  | 2.07719500  | C  | -2.11212100 | 1.16412900  | -0.95232800 |
| H | -4.06136400 | 2.10231000  | 2.07005400  | C  | 1.85981800  | -1.50251400 | 0.67662200  |
| C | -1.79245000 | 5.57930400  | -0.55578800 | C  | 3.03339200  | -0.75711100 | 0.73002100  |
| H | -2.48535600 | 6.02901000  | 0.15887400  | C  | 4.29394800  | -1.26399500 | 0.45340900  |
| H | -0.83371000 | 6.09879500  | -0.47902000 | C  | 4.42880500  | -2.60854300 | 0.14609400  |
| H | -2.18533900 | 5.76272300  | -1.56131300 | C  | 3.29657300  | -3.40729300 | 0.10742800  |
| C | 0.82671700  | 1.37612700  | -1.24265400 | C  | 2.05245300  | -2.84881200 | 0.37012200  |
| H | 1.55092100  | 1.11850900  | -0.46428800 | C  | -0.86492300 | -1.58564800 | 0.37944700  |
| H | 0.58619800  | 0.45210000  | -1.77289100 | C  | -2.13390500 | -1.69340000 | 0.94859600  |
| H | 1.31859500  | 2.06106100  | -1.93691200 | C  | -3.26915300 | -2.06694500 | 0.23987100  |
| C | -3.19107100 | -2.39114100 | 2.18229500  | C  | -3.17009000 | -2.37245500 | -1.10569800 |
| H | -2.29443800 | -3.01572500 | 2.13316300  | C  | -1.92912500 | -2.30617100 | -1.72008600 |
| H | -2.97191200 | -1.54602700 | 2.84026900  | C  | -0.82484200 | -1.92551800 | -0.97390500 |
| H | -3.97660200 | -2.98268400 | 2.65671700  | C  | 2.84359100  | 6.06943000  | -1.89596800 |
| C | -6.79443300 | -2.50696900 | -1.26945400 | C  | 2.24115900  | 1.12573600  | -1.69280300 |
| H | -7.47451600 | -2.55543800 | -0.41522700 | C  | -2.52112300 | 1.67308400  | 2.85653800  |
| H | -7.23101100 | -1.84176000 | -2.01816700 | C  | -5.87816100 | 0.65680100  | -0.68330200 |
| H | -6.74281400 | -3.50964400 | -1.70682700 | C  | -1.10950900 | 1.10201200  | -2.07778200 |
| C | -2.55325800 | -0.10332900 | -2.38293300 | F  | 2.97969300  | 0.55757500  | 1.01838800  |
| H | -2.55322700 | 0.97248000  | -2.18239200 | F  | 5.36615700  | -0.47015900 | 0.47899700  |
| H | -1.50836700 | -0.42883600 | -2.41451800 | F  | 5.62767800  | -3.12363600 | -0.11501200 |

|    |             |             |             |   |             |             |             |
|----|-------------|-------------|-------------|---|-------------|-------------|-------------|
| F  | 3.41061500  | -4.70470800 | -0.17872800 | C | -0.31182800 | -0.74495500 | -2.49569700 |
| F  | 1.01214900  | -3.69178700 | 0.31332600  | H | 0.74030500  | -0.90999600 | -2.74164400 |
| F  | -2.35418100 | -1.38937100 | 2.23795300  | H | -0.85669400 | -1.61082900 | -2.89157000 |
| F  | -4.46271900 | -2.08456200 | 0.83733800  | B | -0.56840300 | -0.64865300 | -0.88319200 |
| F  | -4.25780200 | -2.68912000 | -1.80597300 | C | 2.21566400  | 0.76617700  | -0.82508500 |
| F  | -1.81430000 | -2.56836500 | -3.02352400 | C | 3.00661800  | 0.69192200  | -1.99844700 |
| F  | 0.33011900  | -1.81987100 | -1.65720100 | C | 2.60742700  | 1.18915400  | -3.37041100 |
| H  | -0.02103800 | 1.75324000  | 3.23861100  | H | 3.40264000  | 0.95891200  | -4.08158800 |
| H  | 1.57189600  | 1.44282900  | 2.54324900  | H | 2.46995900  | 2.27480400  | -3.38669500 |
| H  | -0.54507300 | -0.65843400 | 3.15676900  | H | 1.69519100  | 0.72353900  | -3.74729200 |
| H  | 1.19983300  | -0.81434800 | 3.24182300  | C | 4.28155600  | 0.12491900  | -1.91887400 |
| H  | 1.01585000  | 6.04769800  | 0.10881500  | H | 4.87227300  | 0.05948500  | -2.82894300 |
| H  | 3.18123700  | 3.42420500  | -2.48144900 | C | 4.81322000  | -0.37483400 | -0.73644700 |
| H  | -3.71498500 | 0.81623000  | -2.32508100 | C | 6.15205300  | -1.05805300 | -0.69505500 |
| H  | 3.61457300  | 5.76637300  | -2.60776300 | H | 6.78474200  | -0.64412200 | 0.09549700  |
| H  | 2.11128700  | 6.68341300  | -2.43009900 | H | 6.68097100  | -0.96066900 | -1.64575700 |
| H  | 3.30962400  | 6.70598400  | -1.13792300 | H | 6.02224000  | -2.12527000 | -0.48666600 |
| H  | 2.03168900  | 1.10542200  | -2.76728800 | C | 4.04776400  | -0.24286900 | 0.41608500  |
| H  | 1.73085800  | 0.27832600  | -1.24027400 | H | 4.44234200  | -0.60874700 | 1.36170700  |
| H  | 3.31863000  | 0.97433600  | -1.56813700 | C | 2.77414600  | 0.32284000  | 0.40014100  |
| H  | -3.48114100 | 1.78848600  | 3.36359100  | C | 2.06910500  | 0.41753200  | 1.73095500  |
| H  | -2.00108100 | 0.84147800  | 3.33716200  | H | 1.01256200  | 0.15789600  | 1.67140600  |
| H  | -1.94840200 | 2.58643000  | 3.03052700  | H | 2.13764800  | 1.43005200  | 2.14240000  |
| H  | -6.13783100 | 1.04567500  | -1.67125400 | H | 2.53204500  | -0.26643600 | 2.44650100  |
| H  | -6.58376700 | 1.06138100  | 0.04616600  | C | 0.26375400  | 2.61307000  | 0.40933700  |
| H  | -6.01234900 | -0.43054000 | -0.70884300 | C | 0.92600400  | 3.82761000  | 0.09746300  |
| H  | -1.58627700 | 0.72318200  | -2.98505100 | C | 1.71057200  | 4.05582100  | -1.17146700 |
| H  | -0.69102600 | 2.08875300  | -2.30117000 | H | 2.32088200  | 4.95592500  | -1.07462000 |
| H  | -0.27466400 | 0.43429100  | -1.85131800 | H | 1.04462100  | 4.20746900  | -2.02687400 |
| C  | 0.60652700  | 3.96379700  | 0.35874100  | H | 2.38163900  | 3.22509300  | -1.39907700 |
| C  | -0.38270800 | 4.24523800  | 1.46055700  | C | 0.84726600  | 4.89348600  | 0.98978800  |
| H  | -1.37398500 | 3.85054600  | 1.21804400  | H | 1.36582300  | 5.81741700  | 0.74362500  |
| H  | -0.06351800 | 3.80140500  | 2.40892500  | C | 0.13353000  | 4.81341000  | 2.18540000  |
| H  | -0.47947700 | 5.32122500  | 1.61869600  | C | 0.05716600  | 5.99228200  | 3.11756800  |
| H  | -4.85377300 | 1.24441400  | 1.76752000  | H | -0.62841900 | 6.75164100  | 2.72704300  |
|    |             |             |             | H | 1.03563700  | 6.46598900  | 3.23598100  |
| P6 |             |             |             | H | -0.30233900 | 5.69470200  | 4.10515800  |
| P  | 0.41113600  | 1.19190400  | -0.76643400 | C | -0.51209600 | 3.61903100  | 2.47131800  |
| C  | -0.26150700 | 1.78898100  | -2.38323500 | H | -1.07191600 | 3.52337700  | 3.39951100  |
| H  | -1.05951500 | 2.48328000  | -2.11092400 | C | -0.46271400 | 2.51677000  | 1.61199300  |
| H  | 0.47074200  | 2.35079100  | -2.95267900 | C | -1.19244700 | 1.28553100  | 2.08351800  |
| C  | -0.80319300 | 0.55520600  | -3.15198500 | H | -1.11592100 | 0.44529200  | 1.40152600  |
| H  | -1.89710400 | 0.58475200  | -3.13533200 | H | -2.25678400 | 1.50471700  | 2.21563600  |
| H  | -0.50652200 | 0.61413200  | -4.20435100 | H | -0.80403400 | 0.96451600  | 3.05612100  |

|    |             |             |             |   |             |             |             |
|----|-------------|-------------|-------------|---|-------------|-------------|-------------|
| C  | 0.16153100  | -1.74849900 | 0.07326800  | C | 2.84082700  | -2.95893600 | -0.71766900 |
| C  | -0.37011900 | -2.17646500 | 1.29424400  | C | 3.77920000  | -3.46929100 | -1.61879500 |
| F  | -1.57460800 | -1.74880700 | 1.71247600  | H | 3.49817400  | -4.32853100 | -2.22433400 |
| C  | 0.27693100  | -3.03322100 | 2.17336100  | C | 5.05037800  | -2.92563100 | -1.77086800 |
| F  | -0.29605300 | -3.37811300 | 3.32791600  | C | 5.38899500  | -1.85951200 | -0.94583600 |
| C  | 1.53061600  | -3.52696100 | 1.84898300  | H | 6.38840800  | -1.43409300 | -1.01029900 |
| F  | 2.17662600  | -4.33597100 | 2.68556600  | C | 4.49229000  | -1.31957200 | -0.02196100 |
| C  | 2.09482000  | -3.16383900 | 0.63924700  | C | 1.50817100  | -3.66841000 | -0.69014400 |
| F  | 3.30576100  | -3.61588000 | 0.30456200  | H | 1.59506900  | -4.63227400 | -1.19699400 |
| C  | 1.40087300  | -2.32072300 | -0.22110800 | H | 0.72826400  | -3.10480800 | -1.21192400 |
| F  | 2.03433700  | -2.06488000 | -1.37355700 | H | 1.16131900  | -3.86753600 | 0.32395300  |
| C  | -2.18918700 | -0.57602400 | -0.67818100 | C | 6.01627200  | -3.46734600 | -2.79039600 |
| C  | -2.90312400 | -1.76907000 | -0.79446400 | H | 5.87266800  | -4.54003400 | -2.94438100 |
| F  | -2.24102800 | -2.92350000 | -0.97034500 | H | 7.05234700  | -3.30040700 | -2.48465000 |
| C  | -4.28450900 | -1.85841100 | -0.72887300 | H | 5.87630300  | -2.97570600 | -3.75948600 |
| F  | -4.89884500 | -3.03735100 | -0.83617300 | C | 5.00498100  | -0.18551800 | 0.83556600  |
| C  | -5.03248700 | -0.70318300 | -0.55303600 | H | 6.09727500  | -0.17102600 | 0.81857300  |
| F  | -6.36116800 | -0.76216400 | -0.48788600 | H | 4.68617700  | -0.28947200 | 1.87746000  |
| C  | -4.37740900 | 0.51109000  | -0.44784700 | H | 4.65188400  | 0.78828400  | 0.48138700  |
| F  | -5.07678700 | 1.63589600  | -0.28546600 | C | 2.02983500  | 0.74111000  | 0.62880800  |
| C  | -2.98926800 | 0.54691900  | -0.52160500 | C | 2.25255000  | 1.82518100  | 1.51247200  |
| F  | -2.43739100 | 1.77400500  | -0.41939600 | C | 2.31701600  | 3.12383700  | 1.00938300  |
|    |             |             |             | H | 2.47315900  | 3.94944200  | 1.70082800  |
| P7 |             |             |             | C | 2.18821500  | 3.39211900  | -0.35465400 |
| P  | 2.13382400  | -0.96777900 | 1.35687700  | C | 1.94111900  | 2.32274300  | -1.20781900 |
| B  | -1.44470100 | 0.15602200  | 0.51723900  | H | 1.80276900  | 2.51077100  | -2.27156600 |
| C  | 0.03859800  | -2.63186100 | 2.41702300  | C | 1.84411100  | 1.00724600  | -0.74188000 |
| H  | 0.48881100  | -3.60273400 | 2.19980500  | C | 2.42979700  | 1.63741200  | 3.00094200  |
| C  | 0.34700000  | -1.55138200 | 1.34427000  | H | 3.32969000  | 1.05747900  | 3.22925900  |
| H  | 0.05952500  | -1.94763300 | 0.36905800  | H | 1.59004800  | 1.10220400  | 3.45580300  |
| C  | -0.65584500 | -0.39447200 | 1.75683200  | H | 2.51480500  | 2.60851800  | 3.49426700  |
| H  | -0.10874200 | 0.41678500  | 2.24069400  | C | 2.26456500  | 4.80513400  | -0.86963100 |
| C  | -1.56698700 | -1.10081000 | 2.81449000  | H | 1.60028800  | 5.46689100  | -0.30491800 |
| H  | -2.56799700 | -0.67192400 | 2.89735400  | H | 1.98838800  | 4.86143700  | -1.92577400 |
| C  | -0.78367200 | -1.11348200 | 4.13612700  | H | 3.27864500  | 5.20525900  | -0.76704700 |
| H  | -1.41710200 | -1.46932200 | 4.95501100  | C | 1.49891400  | -0.05736700 | -1.75267500 |
| H  | -0.42163700 | -0.11723200 | 4.40766600  | H | 0.90581600  | 0.37401100  | -2.56422900 |
| C  | 0.36641200  | -2.11867900 | 3.83604700  | H | 0.91768500  | -0.86838100 | -1.31074500 |
| H  | 1.35553400  | -1.65784900 | 3.88963700  | H | 2.39708000  | -0.50409300 | -2.19260400 |
| H  | 0.35519600  | -2.95282200 | 4.54310500  | C | -2.58368700 | -0.75009900 | -0.12951600 |
| C  | -1.49601700 | -2.58526600 | 2.41871300  | F | -4.11103700 | 0.27707600  | 1.33762200  |
| H  | -1.94559300 | -3.23636300 | 3.17572200  | C | -3.87086000 | -0.62938900 | 0.37479300  |
| H  | -1.93461800 | -2.81520700 | 1.44320900  | F | -6.14750800 | -1.26618800 | 0.45944200  |
| C  | 3.17504100  | -1.83831000 | 0.07719300  | C | -4.93131700 | -1.41045100 | -0.06082700 |

|    |             |             |             |    |             |             |             |
|----|-------------|-------------|-------------|----|-------------|-------------|-------------|
| F  | -5.70775100 | -3.10655400 | -1.49703100 | H  | -4.07673600 | -2.44786300 | 2.17584300  |
| C  | -4.70834600 | -2.34832300 | -1.05879200 | H  | -3.07287500 | -2.04768000 | 3.57002600  |
| F  | -3.22671000 | -3.37856500 | -2.57046400 | C  | -1.51167800 | -3.21221800 | 1.64664100  |
| C  | -3.43882700 | -2.48802400 | -1.60438800 | H  | -1.11880500 | -3.46659700 | 2.63980700  |
| F  | -1.19978000 | -1.83821400 | -1.70263700 | H  | -2.28437200 | -3.94431300 | 1.40952000  |
| C  | -2.40799100 | -1.68653100 | -1.13683500 | H  | -0.69247400 | -3.33403900 | 0.93603100  |
| C  | -1.26654300 | 1.60010800  | -0.06425900 | C  | 1.81140000  | -0.56433200 | -0.40517000 |
| F  | -0.74887300 | 2.56032600  | 2.04861500  | C  | 2.24965100  | -1.84675100 | -0.06569900 |
| C  | -0.93232900 | 2.69700800  | 0.73377700  | C  | 2.83120100  | 0.34438200  | -0.71110400 |
| F  | -0.46686800 | 4.99263600  | 1.02585900  | C  | 3.58702300  | -2.21096800 | -0.02049000 |
| C  | -0.81159100 | 3.98288100  | 0.22877500  | C  | 4.17723800  | 0.01357700  | -0.69342000 |
| F  | -0.83307600 | 5.42329600  | -1.62708200 | C  | 4.55677000  | -1.27371700 | -0.34182100 |
| C  | -0.99235500 | 4.20446900  | -1.12694300 | F  | 1.37587400  | -2.79929100 | 0.27419000  |
| F  | -1.45155700 | 3.34912700  | -3.27223600 | F  | 3.94470600  | -3.44528700 | 0.32490400  |
| C  | -1.30653300 | 3.14293900  | -1.96498400 | F  | 5.10326500  | 0.91510100  | -1.00857100 |
| F  | -1.71826000 | 0.88561000  | -2.28101200 | F  | 2.54314600  | 1.59899000  | -1.06664200 |
| C  | -1.44650500 | 1.87581000  | -1.42348500 | F  | 5.83938800  | -1.60539900 | -0.31086000 |
| P8 |             |             |             | C  | -0.10664700 | 1.34424300  | -0.21799300 |
| C  | -0.83439300 | -1.17451900 | -0.89891300 | C  | 0.44959000  | 2.06195200  | 0.83934700  |
| H  | -1.07398600 | -0.83841800 | -1.91994200 | C  | -1.05714900 | 2.02654700  | -0.97426300 |
| H  | -0.50562900 | -2.21375600 | -0.97143000 | C  | 0.08503700  | 3.36251000  | 1.14860200  |
| P  | -2.44734300 | -0.93202700 | 0.02665900  | C  | -1.43347800 | 3.33503300  | -0.71103400 |
| B  | 0.28567400  | -0.16579500 | -0.48097000 | C  | -0.86084700 | 4.00359200  | 0.36123300  |
| C  | -3.66759500 | -1.97940300 | -0.97922500 | F  | -1.63998800 | 1.43605100  | -2.02508700 |
| C  | -3.50350700 | -1.55578300 | -2.44746900 | F  | -2.33342200 | 3.95201400  | -1.47374700 |
| H  | -2.60759000 | -1.99257000 | -2.89910000 | F  | -1.21678900 | 5.25305000  | 0.63287900  |
| H  | -4.36667900 | -1.90966400 | -3.02348900 | F  | 0.63079400  | 3.99833700  | 2.18324600  |
| H  | -3.45267700 | -0.46643900 | -2.55982800 | F  | 1.36283500  | 1.48404400  | 1.62987500  |
| C  | -5.07932600 | -1.56909100 | -0.53251500 | P9 |             |             |             |
| H  | -5.82560000 | -2.12175400 | -1.11672200 | C  | -0.29546200 | -0.31606800 | -1.15952600 |
| H  | -5.26362200 | -1.78342200 | 0.52377800  | H  | -0.28805100 | -1.29785100 | -1.63416500 |
| H  | -5.24796300 | -0.49957300 | -0.69219600 | H  | -0.71233700 | 0.39832000  | -1.87639300 |
| C  | -3.52199800 | -3.49879500 | -0.88753400 | B  | 1.08219900  | 0.14916000  | -0.56527100 |
| H  | -3.86009300 | -3.87994800 | 0.08013000  | C  | 2.25923000  | -0.85597100 | -0.29453200 |
| H  | -4.14484400 | -3.97288200 | -1.65711400 | C  | 3.38826300  | -0.47724200 | 0.45316300  |
| H  | -2.48926400 | -3.82618900 | -1.04734200 | C  | 2.25467000  | -2.15488300 | -0.83288600 |
| C  | -2.05583500 | -1.78014100 | 1.67759000  | C  | 4.44059200  | -1.35821800 | 0.68221400  |
| C  | -0.99503700 | -0.87920500 | 2.33276900  | C  | 3.30659900  | -3.03974700 | -0.62187300 |
| H  | -0.83639800 | -1.19322100 | 3.37138400  | C  | 4.39974000  | -2.64311200 | 0.14598500  |
| H  | -0.02061600 | -0.96589900 | 1.83348700  | C  | 1.24919800  | 1.67699900  | -0.21401700 |
| H  | -1.29382500 | 0.17444900  | 2.33981800  | C  | 1.22491500  | 2.64306100  | -1.23001700 |
| C  | -3.32138000 | -1.74724700 | 2.54479100  | C  | 1.36709200  | 2.12589600  | 1.11015300  |
| H  | -3.76669000 | -0.74732800 | 2.58466300  | C  | 1.32014600  | 4.00183300  | -0.94082300 |

|     |             |             |             |   |             |             |             |
|-----|-------------|-------------|-------------|---|-------------|-------------|-------------|
| C   | 1.44068000  | 3.48488700  | 1.40883900  | H | -1.08343000 | 2.53910200  | 1.80898000  |
| C   | 1.42079800  | 4.42607500  | 0.38238000  | H | 0.48227400  | 2.98719000  | 2.42739400  |
| P   | -1.40906500 | -0.35657200 | 0.37504700  | C | -0.50497000 | 1.40098200  | 3.53842100  |
| C   | -2.05434200 | -2.14698400 | 0.33209000  | H | -1.16109500 | 2.07447100  | 4.10197900  |
| C   | -3.29384200 | -2.26067400 | 1.22714500  | H | 0.39182600  | 1.28202700  | 4.14674900  |
| H   | -4.18500900 | -1.84859200 | 0.74479500  | C | -1.17597800 | 0.03677500  | 3.38511200  |
| H   | -3.49423500 | -3.31929000 | 1.43393100  | H | -1.26488100 | -0.40358900 | 4.38479700  |
| H   | -3.15219900 | -1.75604800 | 2.18900100  | H | -2.20155400 | 0.16502700  | 3.01965200  |
| C   | -2.37587600 | -2.75006400 | -1.03959300 | C | -0.38803600 | -0.89868000 | 2.46118600  |
| H   | -3.09664000 | -2.15777800 | -1.60658900 | H | 0.66501600  | -0.88224200 | 2.76379700  |
| H   | -1.48196300 | -2.87925200 | -1.65642700 | H | -0.71866600 | -1.93434600 | 2.61629500  |
| H   | -2.80680400 | -3.74960200 | -0.89799400 | C | 0.38572700  | 2.58368600  | -0.51205600 |
| C   | -0.92742200 | -2.97054600 | 0.97469400  | C | 1.14888700  | 3.76012300  | -0.28818400 |
| H   | 0.01685400  | -2.86779600 | 0.43014400  | C | 1.03516700  | 4.82509600  | -1.18050200 |
| H   | -0.74799500 | -2.66325000 | 2.00953900  | H | 1.62826800  | 5.71847800  | -0.99363400 |
| H   | -1.19943900 | -4.03361200 | 0.97426400  | C | 0.19607800  | 4.78875100  | -2.29160100 |
| C   | -2.80546700 | 0.84308800  | -0.10261700 | C | -0.51643200 | 3.61954900  | -2.51450900 |
| C   | -3.70559000 | 1.05297800  | 1.12421600  | H | -1.15934400 | 3.54249800  | -3.38900700 |
| H   | -4.42612600 | 1.85194200  | 0.90961100  | C | -0.43394000 | 2.51815700  | -1.65787800 |
| H   | -4.27697800 | 0.16157600  | 1.38839400  | C | 2.11483600  | 3.98695400  | 0.85515000  |
| H   | -3.12043200 | 1.35544900  | 1.99847500  | H | 1.65354600  | 4.58760100  | 1.64667800  |
| C   | -3.65407400 | 0.41843900  | -1.30164900 | H | 2.49954800  | 3.07007300  | 1.29544000  |
| H   | -4.27982600 | -0.44869700 | -1.06988200 | H | 2.97591200  | 4.55218900  | 0.49023700  |
| H   | -4.32558400 | 1.23833700  | -1.58788200 | C | 0.09962300  | 5.96680400  | -3.22307700 |
| H   | -3.03698600 | 0.17672600  | -2.17423100 | H | -0.63621100 | 5.79219800  | -4.01103000 |
| C   | -2.14701500 | 2.19789400  | -0.40854700 | H | -0.19079100 | 6.87194600  | -2.68135800 |
| H   | -1.47893000 | 2.52236300  | 0.39675700  | H | 1.06445100  | 6.16850600  | -3.69908500 |
| H   | -1.57169000 | 2.18817300  | -1.33751400 | C | -1.20855900 | 1.30178600  | -2.09160800 |
| H   | -2.93342500 | 2.95425300  | -0.52043600 | H | -0.84135000 | 0.95256200  | -3.06293100 |
| H   | 1.12130000  | 2.32855700  | -2.26715600 | H | -1.13586400 | 0.47429200  | -1.39578000 |
| H   | 1.30379600  | 4.73099300  | -1.74566400 | H | -2.26918000 | 1.54190600  | -2.21290800 |
| H   | 1.48070500  | 5.48560900  | 0.61226300  | C | 2.25740000  | 0.69843400  | 0.73859700  |
| H   | 1.51311100  | 3.80886800  | 2.44290400  | C | 3.09500400  | 0.62590800  | 1.87351300  |
| H   | 1.37608600  | 1.40026300  | 1.92035600  | C | 4.35120300  | 0.02408300  | 1.76470000  |
| H   | 3.44342100  | 0.52906100  | 0.85840700  | H | 4.97304800  | -0.03113300 | 2.65511500  |
| H   | 5.29616600  | -1.04296800 | 1.27165900  | C | 4.82108800  | -0.51706600 | 0.57574000  |
| H   | 5.22124000  | -3.33211700 | 0.31869100  | C | 4.01597700  | -0.37870700 | -0.54937900 |
| H   | 3.27615000  | -4.03553100 | -1.05341100 | H | 4.36902400  | -0.76334600 | -1.50387000 |
| H   | 1.41379700  | -2.48117800 | -1.43959600 | C | 2.76091400  | 0.22625600  | -0.50163600 |
|     |             |             |             | C | 2.74576900  | 1.13963300  | 3.24731200  |
| P10 |             |             |             | H | 3.66300800  | 1.33304400  | 3.80814800  |
| P   | 0.46766900  | 1.20513000  | 0.74075100  | H | 2.17557400  | 2.06782200  | 3.22909900  |
| B   | -0.58485200 | -0.61377100 | 0.85870300  | H | 2.17640300  | 0.39438000  | 3.81044300  |
| C   | -0.16138500 | 2.12969700  | 2.23075400  | C | 6.13482800  | -1.24396200 | 0.49937800  |



|     |             |             |             |   |             |             |             |
|-----|-------------|-------------|-------------|---|-------------|-------------|-------------|
| H   | 5.96140800  | -2.32426000 | 0.44763800  | C | -0.47125700 | -1.41711300 | 3.43870500  |
| H   | 6.69675500  | -0.95871100 | -0.39426400 | H | -1.11360000 | -2.30178100 | 3.40190600  |
| H   | 6.75471700  | -1.04389100 | 1.37632500  | H | -1.09074300 | -0.58857300 | 3.79343000  |
| C   | 2.03305500  | 0.33535600  | -1.81943000 | C | 0.09699100  | -1.11030100 | 2.04935700  |
| H   | 2.43841500  | -0.39278300 | -2.52647300 | H | 0.67394900  | -2.01144100 | 1.77678300  |
| H   | 0.96424800  | 0.14846700  | -1.73881000 | C | 2.92062200  | -0.67517400 | -0.17592700 |
| H   | 2.16017800  | 1.33200100  | -2.25513000 | C | 3.01389300  | -2.03451000 | -0.53395100 |
| C   | -2.20127200 | -0.53938700 | 0.59410000  | C | 4.26465300  | -2.57440000 | -0.85602900 |
| C   | -3.00753200 | 0.57691400  | 0.42045400  | H | 4.31542400  | -3.62651100 | -1.12817100 |
| F   | -2.46762500 | 1.81064600  | 0.33849400  | C | 5.42705000  | -1.81891500 | -0.83874100 |
| C   | -4.39197700 | 0.53269700  | 0.29865000  | C | 5.32310200  | -0.48199900 | -0.45322200 |
| F   | -5.09113900 | 1.65527500  | 0.12072900  | H | 6.22404400  | 0.12549700  | -0.40456000 |
| C   | -5.04298600 | -0.68579700 | 0.36959500  | C | 4.10687300  | 0.10493700  | -0.11658100 |
| F   | -6.36779100 | -0.75366600 | 0.25616900  | C | 1.85589100  | -2.99727000 | -0.60527400 |
| C   | -4.29132900 | -1.83617300 | 0.55727100  | H | 2.11094200  | -3.91720600 | -0.07097300 |
| F   | -4.89742400 | -3.02207900 | 0.62587600  | H | 0.94087500  | -2.60668200 | -0.17222200 |
| C   | -2.91342500 | -1.73803300 | 0.67079700  | H | 1.64594600  | -3.26645800 | -1.64439300 |
| C   | 0.14617800  | -1.72142400 | -0.10576800 | C | 6.75840400  | -2.40711900 | -1.21981900 |
| C   | 1.35444100  | -2.33622400 | 0.22890600  | H | 7.07497700  | -2.04293700 | -2.20290000 |
| F   | 1.97362100  | -2.07713200 | 1.38860600  | H | 7.53431400  | -2.12394300 | -0.50299000 |
| C   | 2.03674300  | -3.22368500 | -0.59539200 | H | 6.71383600  | -3.49750300 | -1.26496300 |
| F   | 3.22305000  | -3.71016800 | -0.22255400 | C | 4.14465500  | 1.55503500  | 0.29810800  |
| C   | 1.48975200  | -3.59077100 | -1.81117600 | H | 3.50578900  | 1.75418600  | 1.15971400  |
| F   | 2.12418600  | -4.44164000 | -2.61439600 | H | 5.16466400  | 1.83412400  | 0.57088100  |
| C   | 0.26485900  | -3.05537500 | -2.17635500 | H | 3.81853500  | 2.21733800  | -0.50905700 |
| F   | -0.29377100 | -3.40334300 | -3.33727900 | C | 1.20882300  | 1.77323100  | -0.52028700 |
| C   | -0.36973500 | -2.15521200 | -1.33201600 | C | 1.10364200  | 1.77525500  | -1.93088200 |
| F   | -1.54695700 | -1.69659400 | -1.79315700 | C | 0.66260900  | 2.92543800  | -2.58430100 |
| F   | -2.25635700 | -2.89601600 | 0.84599300  | H | 0.54951500  | 2.90062100  | -3.66538500 |
|     |             |             |             | C | 0.33551700  | 4.08631100  | -1.88929100 |
| P11 |             |             |             | C | 0.54425200  | 4.09689700  | -0.51277800 |
| P   | 1.29863100  | 0.10669100  | 0.25158900  | H | 0.34409000  | 5.00998700  | 0.04529300  |
| B   | -0.69891600 | -0.71510200 | 0.67686700  | C | 0.97702900  | 2.97210000  | 0.19335600  |
| C   | 1.11840500  | 0.04516100  | 2.10095900  | C | 1.45762100  | 0.57258600  | -2.76874900 |
| H   | 0.57460900  | 0.93791600  | 2.41088700  | H | 1.07276200  | 0.69195300  | -3.78365400 |
| C   | 2.27956600  | -0.20309300 | 3.05047300  | H | 2.54443800  | 0.44872300  | -2.82974000 |
| H   | 2.95918700  | 0.65648000  | 3.10138100  | H | 1.04231500  | -0.35277200 | -2.36768000 |
| H   | 2.86845600  | -1.06022100 | 2.69886100  | C | -0.27457500 | 5.27245100  | -2.58410300 |
| C   | 1.69660200  | -0.50178900 | 4.44116500  | H | 0.10860300  | 6.21404500  | -2.18203400 |
| H   | 1.19502800  | 0.40196800  | 4.81384800  | H | -0.08314500 | 5.24993500  | -3.65929800 |
| H   | 2.50748900  | -0.72539800 | 5.14240700  | H | -1.36033800 | 5.26804600  | -2.43705800 |
| C   | 0.68993500  | -1.65920900 | 4.41534700  | C | 1.16955700  | 3.17043600  | 1.68186700  |
| H   | 1.21647100  | -2.57760900 | 4.12050100  | H | 0.24168600  | 3.01285600  | 2.24385500  |
| H   | 0.30233900  | -1.83031900 | 5.42547500  | H | 1.93098800  | 2.52048300  | 2.11265700  |

|     |             |             |             |     |             |             |             |
|-----|-------------|-------------|-------------|-----|-------------|-------------|-------------|
| H   | 1.47744600  | 4.20269800  | 1.86543000  | H   | -3.29841900 | 5.16665500  | -0.01221100 |
| C   | -1.49617600 | -1.89569600 | -0.09003200 | C   | -1.88803500 | 3.58192900  | 0.31900700  |
| C   | -2.57820300 | -2.42615900 | 0.61076000  | H   | -1.42671500 | 4.07604700  | 1.16928400  |
| F   | -2.88230200 | -1.93360700 | 1.82308100  | C   | 1.45843900  | 2.02336200  | -0.12129000 |
| C   | -3.40106800 | -3.43099100 | 0.12414900  | C   | 2.68494800  | 2.01893300  | 0.55318600  |
| F   | -4.41890800 | -3.89472100 | 0.85020900  | H   | 2.72607200  | 1.82472500  | 1.62119400  |
| C   | -3.15964400 | -3.94578500 | -1.14051500 | C   | 3.86718100  | 2.24972700  | -0.14311300 |
| F   | -3.93106100 | -4.91251500 | -1.63290100 | H   | 4.81375500  | 2.23972700  | 0.38777900  |
| C   | -2.11200000 | -3.43518500 | -1.88946200 | C   | 3.83547300  | 2.48167800  | -1.51670300 |
| F   | -1.87769100 | -3.91091600 | -3.11369500 | H   | 4.75966800  | 2.65023600  | -2.06012300 |
| C   | -1.31857300 | -2.42262600 | -1.36333200 | C   | 2.61685300  | 2.49853000  | -2.18949400 |
| F   | -0.34619000 | -1.97244800 | -2.16960500 | H   | 2.58608600  | 2.68398200  | -3.25818900 |
| C   | -1.50572900 | 0.68712100  | 0.50726700  | C   | 1.43101700  | 2.27173500  | -1.49670100 |
| C   | -1.87907900 | 1.57849100  | 1.50522000  | H   | 0.48724200  | 2.27778700  | -2.03296200 |
| F   | -1.63087000 | 1.31618700  | 2.79975400  | C   | 1.29468900  | -1.01564500 | 0.56492600  |
| C   | -2.45498000 | 2.82055600  | 1.25599600  | C   | 2.42799300  | -1.39080400 | 1.27768200  |
| F   | -2.73239700 | 3.64670700  | 2.26688400  | F   | 2.40744600  | -1.51589100 | 2.61555000  |
| C   | -2.69323400 | 3.21532800  | -0.04811500 | C   | 3.66315400  | -1.63358200 | 0.68119200  |
| F   | -3.19917200 | 4.41808400  | -0.31263500 | F   | 4.71278100  | -1.98812800 | 1.42590800  |
| C   | -2.35994500 | 2.35602300  | -1.08535200 | C   | 3.80344300  | -1.50408500 | -0.68879700 |
| F   | -2.54213500 | 2.74261700  | -2.34884000 | F   | 4.97948300  | -1.72613800 | -1.27198800 |
| C   | -1.79325000 | 1.12873700  | -0.78926200 | C   | 2.70089200  | -1.13795700 | -1.45043800 |
| F   | -1.43301100 | 0.37451200  | -1.83744600 | F   | 2.82075500  | -0.98397500 | -2.76930200 |
|     |             |             |             | C   | 1.49327100  | -0.92270900 | -0.81277700 |
|     |             |             |             | F   | 0.46651700  | -0.52874400 | -1.59204100 |
| P12 |             |             |             | C   | -1.45855000 | -1.18226700 | 0.57703700  |
| P   | -0.05756100 | 1.50645500  | 0.75235500  | C   | -2.71055000 | -0.64010500 | 0.86744400  |
| C   | 0.05768300  | 2.09627900  | 2.48713600  | F   | -2.79887600 | 0.46228300  | 1.63747200  |
| H   | 0.66816300  | 2.99858900  | 2.57845500  | C   | -3.90938300 | -1.14072100 | 0.38323500  |
| H   | -0.96469200 | 2.33187900  | 2.80344100  | F   | -5.06890700 | -0.55722100 | 0.68928300  |
| C   | 0.58229300  | 0.88951900  | 3.28951600  | C   | -3.89108100 | -2.26383600 | -0.43041400 |
| H   | 1.65730200  | 0.76075500  | 3.11887700  | F   | -5.02677400 | -2.76890200 | -0.90785300 |
| H   | 0.45356100  | 1.08290100  | 4.35945200  | C   | -2.67674200 | -2.85396600 | -0.73916900 |
| C   | -0.16973800 | -0.36600500 | 2.82786300  | F   | -2.64579500 | -3.94015600 | -1.51311100 |
| H   | -1.21112200 | -0.28268300 | 3.15674300  | C   | -1.49923000 | -2.31415900 | -0.23378900 |
| H   | 0.23668600  | -1.25777700 | 3.31108900  | F   | -0.37558500 | -2.96146400 | -0.57320100 |
| B   | -0.11745500 | -0.51561000 | 1.20043200  |     |             |             |             |
| C   | -1.42790600 | 2.33272900  | -0.10664800 | P13 |             |             |             |
| C   | -2.02215200 | 1.70875100  | -1.20991200 | P   | -1.10459000 | -1.27893700 | -0.54449300 |
| H   | -1.66519700 | 0.73778500  | -1.54328500 | B   | 0.27279500  | 0.13304200  | -0.94981900 |
| C   | -3.07347100 | 2.33353200  | -1.87552000 | C   | -0.78544500 | -2.65877100 | -1.70856000 |
| H   | -3.53543400 | 1.84705700  | -2.72842900 | H   | 0.15027100  | -3.13477900 | -1.40087200 |
| C   | -3.53516700 | 3.57422700  | -1.44273700 | H   | -1.58911200 | -3.39650400 | -1.61375400 |
| H   | -4.35964100 | 4.05578700  | -1.95870500 | C   | -0.67004000 | -2.13641300 | -3.14743000 |
| C   | -2.94133100 | 4.19870800  | -0.34844800 |     |             |             |             |

|   |             |             |             |     |             |             |             |
|---|-------------|-------------|-------------|-----|-------------|-------------|-------------|
| H | -0.47169000 | -2.99557100 | -3.79694900 | C   | -0.61403300 | 3.82825900  | 0.23837400  |
| H | -1.63631900 | -1.72017800 | -3.46029700 | F   | -0.97434400 | 4.99317400  | -0.30216100 |
| C | 0.42244200  | -1.07778400 | -3.32874800 | C   | -0.41421600 | 3.73565200  | 1.60655900  |
| H | 0.52484400  | -0.87621500 | -4.40074900 | F   | -0.58782500 | 4.80054700  | 2.38559200  |
| H | 1.38405000  | -1.49622800 | -3.00020100 | C   | -0.04188900 | 2.51855200  | 2.15705000  |
| C | 0.13661100  | 0.23679900  | -2.58318500 | F   | 0.15339500  | 2.41457200  | 3.47228800  |
| H | -0.84103800 | 0.60316000  | -2.91485100 | C   | 0.13501400  | 1.42548500  | 1.32128900  |
| H | 0.85508200  | 0.99420000  | -2.91436000 | F   | 0.51258700  | 0.27814100  | 1.90830800  |
| C | -1.39360900 | -1.99153200 | 1.11031000  |     |             |             |             |
| C | -1.05823700 | -3.31067000 | 1.42195600  | P14 |             |             |             |
| H | -0.56975700 | -3.94405800 | 0.68786900  | P   | 0.33407400  | 2.00399200  | 0.14746100  |
| C | -1.34200500 | -3.81972500 | 2.68706200  | B   | -0.04431100 | 0.09540400  | 0.84062900  |
| H | -1.08135300 | -4.84638400 | 2.92320900  | C   | 1.43562900  | 2.34694200  | 1.57915100  |
| C | -1.95385900 | -3.01601000 | 3.64375200  | H   | 2.35521000  | 1.78717700  | 1.38660100  |
| H | -2.17086900 | -3.41533700 | 4.62947100  | H   | 1.70201800  | 3.40200100  | 1.68058300  |
| C | -2.29006100 | -1.69859200 | 3.33611200  | C   | 0.74020700  | 1.75697700  | 2.81492300  |
| H | -2.76840800 | -1.06856000 | 4.07888500  | H   | 0.06030500  | 2.50639800  | 3.23423000  |
| C | -2.01770900 | -1.18974400 | 2.07271200  | H   | 1.49256000  | 1.56506700  | 3.58433000  |
| H | -2.29876300 | -0.16753900 | 1.82926100  | C   | -0.03682500 | 0.46466900  | 2.44915200  |
| C | -2.79485100 | -0.71665100 | -0.98616000 | H   | -1.07125300 | 0.55636200  | 2.79489300  |
| C | -3.83774000 | -1.64500900 | -0.85683800 | H   | 0.37470600  | -0.38196300 | 3.00174300  |
| H | -3.63234700 | -2.64898500 | -0.49274700 | C   | -1.10692900 | 3.24126600  | 0.29361900  |
| C | -5.14292600 | -1.28809500 | -1.17128700 | C   | -0.62363200 | 4.56863100  | 0.89787600  |
| H | -5.93970200 | -2.01760400 | -1.06817300 | H   | -1.47703200 | 5.25501100  | 0.94225500  |
| C | -5.42536400 | 0.00504300  | -1.60850500 | H   | 0.15662000  | 5.05228400  | 0.30651900  |
| H | -6.44548200 | 0.28633900  | -1.85013700 | H   | -0.25574100 | 4.44212300  | 1.92010200  |
| C | -4.39816300 | 0.93373800  | -1.73123100 | C   | -1.79432500 | 3.51756900  | -1.05279200 |
| H | -4.61105100 | 1.94328600  | -2.06758600 | H   | -2.20412900 | 2.61119300  | -1.49984700 |
| C | -3.08557600 | 0.57710300  | -1.42393400 | H   | -1.13969900 | 3.99984700  | -1.77971200 |
| H | -2.30125100 | 1.31393100  | -1.54128700 | H   | -2.62924400 | 4.20216700  | -0.86515400 |
| C | 1.81012700  | -0.30759000 | -0.59166100 | C   | -2.17449200 | 2.65931500  | 1.23565600  |
| C | 2.27042000  | -1.47236400 | 0.00354900  | H   | -1.80282800 | 2.51745900  | 2.25158700  |
| F | 1.40046800  | -2.42510300 | 0.39331200  | H   | -2.57330900 | 1.70841600  | 0.87503200  |
| C | 3.61071800  | -1.75422600 | 0.23824300  | H   | -3.00479400 | 3.37301700  | 1.28646500  |
| F | 3.97195500  | -2.90555500 | 0.80712400  | C   | 1.38921200  | 2.35613800  | -1.38300200 |
| C | 4.57151000  | -0.82447200 | -0.11944600 | C   | 2.77141400  | 1.69167100  | -1.23503800 |
| F | 5.86271100  | -1.06906800 | 0.09349000  | H   | 2.72156100  | 0.61349300  | -1.08106500 |
| C | 4.17000900  | 0.36757900  | -0.70381400 | H   | 3.35977100  | 2.13772300  | -0.42891900 |
| F | 5.08152400  | 1.27785300  | -1.04745900 | H   | 3.31914300  | 1.86375300  | -2.16845300 |
| C | 2.81936800  | 0.59930600  | -0.92097400 | C   | 1.65470600  | 3.86070600  | -1.54415300 |
| F | 2.50698600  | 1.78162600  | -1.47667300 | H   | 2.34858900  | 3.99499100  | -2.38202400 |
| C | -0.05990600 | 1.46025900  | -0.05879000 | H   | 2.13061700  | 4.28681300  | -0.65510700 |
| C | -0.42509300 | 2.70572900  | -0.55808700 | H   | 0.75968800  | 4.44020400  | -1.77218100 |
| F | -0.65248300 | 2.87500600  | -1.87161600 | C   | 0.71971100  | 1.79346300  | -2.64320300 |

|     |             |             |             |     |             |             |             |
|-----|-------------|-------------|-------------|-----|-------------|-------------|-------------|
| H   | -0.26654800 | 2.22378300  | -2.82607400 | F   | 3.21452300  | 4.90957900  | 0.02307600  |
| H   | 0.60569800  | 0.70868700  | -2.58589000 | C   | 2.96846100  | 2.88961600  | 1.18849400  |
| H   | 1.35358400  | 2.02761800  | -3.50602900 | F   | 3.51381200  | 3.42243300  | 2.26986500  |
| C   | 1.22335100  | -0.82726300 | 0.35873200  | C   | 2.52744400  | 1.57541700  | 1.19393400  |
| C   | 1.22255700  | -1.50925900 | -0.86054800 | F   | 2.67618200  | 0.86180700  | 2.30620400  |
| F   | 0.18700000  | -1.39089400 | -1.70939800 | C   | 2.62447400  | -1.80572100 | -0.10990800 |
| C   | 2.26919900  | -2.29795600 | -1.31687500 | C   | 3.62169600  | -1.55785800 | -1.05167400 |
| F   | 2.19594200  | -2.90809000 | -2.49981300 | F   | 3.60973600  | -0.43535400 | -1.76995600 |
| C   | 3.40377400  | -2.44369200 | -0.53383700 | C   | 4.63628900  | -2.47180000 | -1.29356800 |
| F   | 4.41994100  | -3.19380000 | -0.95102000 | F   | 5.57094400  | -2.21619400 | -2.19668100 |
| C   | 3.46356100  | -1.78972200 | 0.68502800  | C   | 4.66513700  | -3.66560500 | -0.58030500 |
| F   | 4.54837400  | -1.90998700 | 1.45102300  | F   | 5.62653500  | -4.54205400 | -0.80677000 |
| C   | 2.39069800  | -1.00941500 | 1.10092400  | C   | 3.68267800  | -3.94369600 | 0.36267900  |
| F   | 2.57399700  | -0.39092500 | 2.28091800  | F   | 3.71072000  | -5.08300100 | 1.03638900  |
| C   | -1.44584500 | -0.61263500 | 0.40088400  | C   | 2.67957200  | -3.01209800 | 0.58533700  |
| C   | -2.15495000 | -0.37374300 | -0.76989300 | F   | 1.74405800  | -3.29239000 | 1.49031900  |
| F   | -1.67811900 | 0.50480000  | -1.67140800 | C   | -3.02382700 | -0.84038500 | -0.30586600 |
| C   | -3.34947500 | -0.99549000 | -1.10077300 | C   | -4.15497300 | -0.02576400 | -0.30644900 |
| F   | -3.97970200 | -0.70317100 | -2.24059900 | F   | -4.07628800 | 1.25419500  | 0.09615500  |
| C   | -3.87899800 | -1.94423400 | -0.23918300 | C   | -5.41812900 | -0.45208800 | -0.69536000 |
| F   | -5.02245000 | -2.55947900 | -0.53432500 | F   | -6.45236400 | 0.38857600  | -0.68087900 |
| C   | -3.19902500 | -2.24725000 | 0.92876500  | C   | -5.60568000 | -1.76793600 | -1.09010800 |
| F   | -3.68546700 | -3.17013400 | 1.76063200  | F   | -6.80932300 | -2.19646200 | -1.46337600 |
| C   | -2.00965200 | -1.58960000 | 1.21830600  | C   | -4.52154500 | -2.63085000 | -1.08274500 |
| F   | -1.39998900 | -1.95977000 | 2.35496100  | F   | -4.67805900 | -3.90506300 | -1.44434100 |
| P15 |             |             |             | C   | -3.27958200 | -2.15568800 | -0.68270000 |
| P   | 1.24812500  | -0.66651800 | 0.22878200  | F   | -2.28482200 | -3.07019700 | -0.67950600 |
| B   | -1.57715400 | -0.36621300 | 0.32717700  | C   | -2.43534800 | -0.09992300 | 2.78913900  |
| C   | -0.32080800 | -1.12651000 | -0.53286800 | C   | -2.64749300 | -0.51404900 | 4.09709100  |
| H   | -0.31388500 | -2.18957600 | -0.24419100 | C   | -2.10469700 | -1.71764600 | 4.54795600  |
| C   | -0.42643000 | -1.06366100 | -2.06379500 | C   | -1.36957800 | -2.49963900 | 3.66711000  |
| H   | -0.55549000 | -0.03189600 | -2.38985400 | C   | -1.17108800 | -2.07370500 | 2.35198400  |
| H   | -1.36636900 | -1.57048700 | -2.29512600 | C   | -1.67678800 | -0.85659000 | 1.87940800  |
| C   | 0.70159900  | -1.72955900 | -2.84744400 | F   | -0.49329211 | -2.89885176 | 1.52601453  |
| H   | 1.62853900  | -1.15053900 | -2.80093700 | F   | -0.85533181 | -3.67944453 | 4.07467566  |
| H   | 0.43257500  | -1.81008100 | -3.90340000 | F   | -2.30395944 | -2.12334963 | 5.82004053  |
| H   | 0.90085100  | -2.74224300 | -2.47868300 | F   | -3.38312163 | 0.24981681  | 4.93247088  |
| C   | 1.93399000  | 0.99903000  | 0.06996400  | F   | -2.98379856 | 1.06128767  | 2.37285572  |
| C   | 1.81574100  | 1.77891600  | -1.07623400 | P16 |             |             |             |
| F   | 1.27974600  | 1.26932200  | -2.18034100 | C   | -1.43431600 | -0.23882700 | 2.79069800  |
| C   | 2.24365600  | 3.09673600  | -1.10314100 | H   | -2.26606700 | -0.33623700 | 2.09401100  |
| F   | 2.08423200  | 3.83261900  | -2.19228400 | H   | -1.56554100 | 0.69067900  | 3.35821900  |
| C   | 2.81335700  | 3.65289100  | 0.03733300  | H   | -1.48810000 | -1.06036500 | 3.51198400  |

|   |             |             |             |     |             |             |             |
|---|-------------|-------------|-------------|-----|-------------|-------------|-------------|
| C | -0.10004800 | -0.23814500 | 2.11935400  | F   | 4.18338600  | -5.28120200 | 0.21005500  |
| H | 0.74716000  | -0.30893400 | 2.80826600  | C   | 4.30814200  | -2.99089700 | 0.72323100  |
| C | 0.18233800  | -0.15103600 | 0.81240100  | F   | 5.53873600  | -3.14977100 | 1.20305400  |
| P | -1.00609800 | 0.02506900  | -0.58886400 | C   | 3.70300500  | -1.74472200 | 0.71588300  |
| C | -1.96583000 | 1.53505600  | -0.09573700 | F   | 4.40936800  | -0.72200500 | 1.20622700  |
| C | -3.22094300 | 1.62662800  | 0.50116800  |     |             |             |             |
| F | -3.91286900 | 0.53532700  | 0.84574500  | P18 |             |             |             |
| C | -3.82472200 | 2.84571300  | 0.78241500  | P   | -1.16627000 | 1.19580900  | -0.56083400 |
| F | -5.02055600 | 2.88080200  | 1.36389100  | Si  | 3.39267800  | -2.21039200 | -0.32196200 |
| C | -3.17705200 | 4.02825400  | 0.45991400  | B   | 0.43875400  | -0.40535600 | 0.13445300  |
| F | -3.74376800 | 5.19629400  | 0.73347200  | C   | -0.36853800 | 1.05109200  | -2.21471200 |
| C | -1.93209000 | 3.98115700  | -0.15005700 | H   | -0.58460900 | 0.07326400  | -2.64043800 |
| F | -1.30211100 | 5.10597400  | -0.47484900 | H   | -0.69785000 | 1.82293300  | -2.90938600 |
| C | -1.36491400 | 2.74853400  | -0.42807800 | C   | 1.13025100  | 1.11128200  | -1.93588300 |
| F | -0.17709400 | 2.74816100  | -1.04448300 | H   | 1.67715400  | 1.09469900  | -2.88147700 |
| C | -2.25384100 | -1.32605800 | -0.41114300 | H   | 1.38843000  | 2.05460100  | -1.43535900 |
| C | -3.35461100 | -1.23558200 | -1.26371000 | C   | 1.49853500  | -0.06838400 | -1.04956700 |
| F | -3.51384800 | -0.12765000 | -1.99690000 | C   | 2.67953200  | -0.69953500 | -1.22468300 |
| C | -4.31504800 | -2.22443100 | -1.37699200 | C   | 4.55916500  | -3.09347900 | -1.51195200 |
| F | -5.35110200 | -2.07677300 | -2.19772100 | H   | 4.96441000  | -3.98723900 | -1.02343900 |
| C | -4.18055700 | -3.38183400 | -0.62251500 | H   | 5.40268100  | -2.46599400 | -1.81477300 |
| F | -5.08454700 | -4.34927000 | -0.71573400 | H   | 4.04518400  | -3.42235000 | -2.42121600 |
| C | -3.10147900 | -3.51441900 | 0.23532900  | C   | 4.43166100  | -1.66025800 | 1.15440300  |
| F | -2.97019000 | -4.61701700 | 0.96906000  | H   | 3.82265900  | -1.39283500 | 2.02223600  |
| C | -2.15555700 | -2.49882900 | 0.33449600  | H   | 5.05510000  | -0.79718700 | 0.89696100  |
| F | -1.15872800 | -2.71355100 | 1.19462700  | H   | 5.10245300  | -2.47111100 | 1.46053100  |
| B | 1.68244300  | -0.14346200 | 0.34172200  | C   | 2.13428900  | -3.50903100 | 0.19640300  |
| C | 2.43505100  | 1.18855100  | 0.01231800  | H   | 2.68208900  | -4.35553600 | 0.62786000  |
| C | 3.56385100  | 1.23062100  | -0.81846100 | H   | 1.59261300  | -3.88348100 | -0.67850300 |
| F | 4.05899700  | 0.11154700  | -1.34875000 | H   | 1.40532900  | -3.18139600 | 0.93787900  |
| C | 4.21099300  | 2.40646800  | -1.15870200 | C   | 3.65591700  | -0.15799800 | -2.22706200 |
| F | 5.26949800  | 2.39508200  | -1.96448500 | C   | 3.75256800  | -0.67763200 | -3.52391000 |
| C | 3.74019700  | 3.61158200  | -0.65339300 | H   | 3.08347800  | -1.48118100 | -3.82207800 |
| F | 4.34736400  | 4.74449900  | -0.96986800 | C   | 4.68504500  | -0.17219400 | -4.42551200 |
| C | 2.63281100  | 3.62543600  | 0.18103800  | H   | 4.74448300  | -0.58493000 | -5.42832100 |
| F | 2.17666700  | 4.77703500  | 0.66556600  | C   | 5.54372400  | 0.85713100  | -4.04357100 |
| C | 2.00742500  | 2.43030700  | 0.49825500  | H   | 6.27411300  | 1.24727700  | -4.74547800 |
| F | 0.95296900  | 2.52596700  | 1.30904200  | C   | 5.45581200  | 1.38404300  | -2.75801300 |
| C | 2.40769100  | -1.53476400 | 0.24252200  | H   | 6.11500300  | 2.19176700  | -2.45403500 |
| C | 1.75302000  | -2.66076700 | -0.25547100 | C   | 4.51731300  | 0.88191500  | -1.85860100 |
| F | 0.53029300  | -2.54761400 | -0.78984000 | H   | 4.43348400  | 1.30381100  | -0.85968500 |
| C | 2.33183400  | -3.91957500 | -0.28392300 | C   | -1.33292400 | 3.04091300  | -0.37211000 |
| F | 1.67716700  | -4.96177200 | -0.78750700 | C   | -2.01476000 | 3.79365400  | -1.36560900 |
| C | 3.61550600  | -4.08349400 | 0.21857100  | C   | -2.02684700 | 5.18366400  | -1.27812000 |

|   |             |             |             |     |             |             |             |
|---|-------------|-------------|-------------|-----|-------------|-------------|-------------|
| H | -2.55472000 | 5.74422900  | -2.04711600 | F   | 1.70181700  | -1.74190300 | 4.85636800  |
| C | -1.39882900 | 5.87564800  | -0.24353500 | C   | 1.79350500  | -0.86537400 | 3.85650400  |
| C | -0.79021300 | 5.12423200  | 0.75106400  | F   | 0.40388000  | -2.22623000 | 2.63715400  |
| H | -0.33059300 | 5.62949400  | 1.59811000  | C   | 1.09782300  | -1.07964000 | 2.67071700  |
| C | -0.75934000 | 3.72637500  | 0.71826400  | C   | -0.63222800 | -1.59893600 | -0.01903700 |
| C | -2.77725600 | 3.20391400  | -2.53002600 | F   | 0.09340000  | -2.28290100 | -2.18391600 |
| H | -3.65688200 | 3.81979100  | -2.73333600 | C   | -0.75086600 | -2.40522100 | -1.14710200 |
| H | -3.12860200 | 2.19199100  | -2.33910000 | F   | -1.84110900 | -4.04691000 | -2.44976100 |
| H | -2.17824500 | 3.19850900  | -3.44711100 | C   | -1.76016700 | -3.34726400 | -1.31583200 |
| C | -1.39471900 | 7.37986300  | -0.21302900 | F   | -3.71891100 | -4.37012200 | -0.49467100 |
| H | -2.37613200 | 7.78270400  | -0.47842300 | C   | -2.71598200 | -3.51157100 | -0.32956500 |
| H | -0.67301600 | 7.77814600  | -0.93404800 | F   | -3.58826100 | -2.85300700 | 1.75516300  |
| H | -1.12217000 | 7.75772100  | 0.77493900  | C   | -2.64550600 | -2.73523800 | 0.81863400  |
| C | -0.16583200 | 3.06169000  | 1.93304000  | F   | -1.67994000 | -1.00937500 | 2.01872700  |
| H | -0.76697100 | 3.31343400  | 2.81352100  | C   | -1.63100500 | -1.80307200 | 0.93936400  |
| H | 0.85092100  | 3.42019300  | 2.11631300  |     |             |             |             |
| H | -0.13914500 | 1.97915900  | 1.84921700  | P19 |             |             |             |
| C | -2.88228800 | 0.49123800  | -0.54179100 | P   | 1.65845200  | -1.11722400 | -1.51001700 |
| C | -3.58731900 | 0.63196700  | 0.67926200  | B   | -2.13349400 | -0.11692000 | -0.79295400 |
| C | -4.76706200 | -0.08114900 | 0.88627800  | C   | -0.04166000 | -1.46152300 | -0.82114300 |
| H | -5.27182500 | 0.01646200  | 1.84437900  | H   | -0.09101000 | -1.09188800 | 0.20949100  |
| C | -5.29361000 | -0.93287300 | -0.07851000 | C   | -1.02110100 | -0.67223100 | -1.75178800 |
| C | -4.63883900 | -0.99499500 | -1.30334300 | H   | -1.35622500 | -1.32194400 | -2.55952800 |
| H | -5.05515200 | -1.62334700 | -2.08794100 | H   | -0.51034800 | 0.18214400  | -2.21152800 |
| C | -3.45034000 | -0.30726500 | -1.56782200 | C   | -0.33410000 | -2.96195400 | -0.83288700 |
| C | -3.11210800 | 1.50895300  | 1.81090100  | H   | -1.32657400 | -3.15711700 | -0.41765300 |
| H | -3.70292500 | 1.31065400  | 2.70747000  | H   | 0.38669500  | -3.51989000 | -0.23155000 |
| H | -3.21118500 | 2.57134500  | 1.56720800  | H   | -0.31407900 | -3.35491200 | -1.85390200 |
| H | -2.06946300 | 1.31416300  | 2.06432100  | C   | 2.86267900  | -1.86820800 | -0.31269400 |
| C | -6.48851300 | -1.79900400 | 0.20748700  | C   | 2.62751600  | -2.39089500 | 0.95734900  |
| H | -7.07063200 | -1.99156200 | -0.69723400 | C   | 3.63091500  | -2.97847400 | 1.71687700  |
| H | -7.14484900 | -1.34553700 | 0.95410300  | C   | 4.92462800  | -3.03979400 | 1.22112100  |
| H | -6.15559300 | -2.76637600 | 0.60002200  | C   | 5.20403400  | -2.52014300 | -0.03398000 |
| C | -2.91505600 | -0.48034000 | -2.97533500 | C   | 4.17855100  | -1.94884800 | -0.77131900 |
| H | -2.09157000 | -1.19909800 | -3.03676800 | C   | 1.83232000  | 0.65652100  | -0.99908600 |
| H | -2.57506600 | 0.45655400  | -3.41875800 | C   | 1.81641200  | 1.09499000  | 0.32457700  |
| H | -3.71394500 | -0.86657800 | -3.61193200 | C   | 2.00091500  | 2.42410600  | 0.66781000  |
| C | 1.13631700  | -0.20549300 | 1.58069400  | C   | 2.15783100  | 3.37377900  | -0.33416600 |
| F | 2.12014900  | 1.80809900  | 0.80411400  | C   | 2.14164800  | 2.98363600  | -1.66443800 |
| C | 1.98625700  | 0.88873600  | 1.77074600  | C   | 1.98709400  | 1.63729900  | -1.97608000 |
| F | 3.41709700  | 2.25718200  | 3.05525700  | C   | -3.50324900 | -0.81959900 | -0.50460000 |
| C | 2.68139000  | 1.15100600  | 2.93980000  | C   | -3.88605400 | -2.01553000 | -1.13166100 |
| F | 3.23632600  | 0.49091000  | 5.13503300  | C   | -5.09940600 | -2.64467400 | -0.90034400 |
| C | 2.58342600  | 0.26301100  | 4.00023400  | C   | -6.00693200 | -2.07272400 | -0.02106700 |

|     |             |             |             |   |             |             |             |
|-----|-------------|-------------|-------------|---|-------------|-------------|-------------|
| C   | -5.68851200 | -0.88358700 | 0.61832000  | B | -2.70937600 | 0.68219400  | -0.51730900 |
| C   | -4.46357500 | -0.28486000 | 0.36943600  | C | -1.73832100 | -0.51261100 | -0.81712700 |
| C   | -1.70313000 | 1.19388500  | -0.01298400 | C | -0.75740500 | -0.46161400 | -1.80850600 |
| C   | -1.58315400 | 1.22219100  | 1.37268200  | F | -0.60205600 | 0.63996300  | -2.54337200 |
| C   | -1.12481100 | 2.32942400  | 2.06898900  | C | 0.06065600  | -1.53979700 | -2.11054400 |
| C   | -0.78378600 | 3.47594900  | 1.36140000  | F | 0.98311300  | -1.45433100 | -3.06855000 |
| C   | -0.88323100 | 3.48913200  | -0.02198000 | C | -0.09281700 | -2.72395200 | -1.40435300 |
| C   | -1.31446500 | 2.34816900  | -0.68396100 | F | 0.67833300  | -3.76966700 | -1.67715300 |
| F   | 1.41277600  | -2.36082100 | 1.50971500  | C | -1.04860200 | -2.81953500 | -0.40388500 |
| F   | 3.35882600  | -3.47206300 | 2.92194300  | C | -1.84820200 | -1.72334200 | -0.12951200 |
| F   | 5.89011500  | -3.58978000 | 1.94566800  | F | -2.74475100 | -1.86126200 | 0.85445800  |
| F   | 6.44225900  | -2.56907100 | -0.51689000 | F | -1.18305800 | -3.95622900 | 0.27770900  |
| F   | 4.49281800  | -1.44760000 | -1.96903400 | C | -4.22451200 | 0.32895000  | -0.24678700 |
| F   | 1.60898100  | 0.23105600  | 1.32293200  | C | -4.92345800 | -0.53816300 | -1.08463900 |
| F   | 1.94513600  | 2.81177900  | 1.94135400  | F | -4.32048500 | -1.05888300 | -2.15899200 |
| F   | 2.27217800  | 4.65431800  | -0.01442100 | C | -6.25038500 | -0.88151200 | -0.87589800 |
| F   | 2.26512100  | 3.89307900  | -2.62507100 | F | -6.88688600 | -1.69530700 | -1.71491300 |
| F   | 1.97620300  | 1.30548700  | -3.26637600 | C | -6.91651300 | -0.36609000 | 0.22728800  |
| F   | -3.08306500 | -2.63202400 | -2.00074900 | F | -8.18496100 | -0.68907400 | 0.44679400  |
| F   | -5.40111900 | -3.78312200 | -1.51754500 | C | -6.25475000 | 0.48637500  | 1.09939100  |
| F   | -7.17060600 | -2.65916800 | 0.20729100  | C | -4.93157500 | 0.82100000  | 0.84861200  |
| F   | -6.55960400 | -0.32477300 | 1.45269600  | F | -4.33232100 | 1.62523800  | 1.73182300  |
| F   | -4.24572400 | 0.86280300  | 1.00985900  | F | -6.88976800 | 0.97007700  | 2.16469000  |
| F   | -1.90507200 | 0.12893900  | 2.07430200  | C | 2.11146200  | -0.96894200 | 0.93573500  |
| F   | -0.99397300 | 2.30408000  | 3.39133500  | C | 2.30692500  | -2.32696200 | 0.57277800  |
| F   | -0.30621200 | 4.53541300  | 2.00032800  | C | 3.18925100  | -2.73729400 | -0.58269800 |
| F   | -0.48158000 | 4.56069100  | -0.70574600 | C | 1.66030800  | -3.33899600 | 1.28287100  |
| F   | -1.35768500 | 2.39637200  | -2.02232500 | C | 0.79664000  | -3.06020000 | 2.33753500  |
| P20 |             |             |             | C | 0.03640100  | -4.14810200 | 3.04773400  |
| P   | 2.81794500  | 0.21205200  | -0.30407400 | C | 0.64182100  | -1.72779100 | 2.70583500  |
| C   | 2.52073000  | 1.95912500  | 0.17597500  | C | 1.28935300  | -0.67689300 | 2.04821000  |
| C   | 3.51257300  | 2.90884100  | 0.43992300  | C | 1.05101200  | 0.70106700  | 2.62178000  |
| C   | 3.21925700  | 4.27744600  | 0.55125400  | C | 4.65718500  | 0.09241900  | -0.14636600 |
| C   | 1.92709400  | 4.76052400  | 0.39382600  | C | 5.37831600  | 0.10575100  | -1.36208900 |
| C   | 0.91187200  | 3.83727500  | 0.12946900  | C | 4.69642700  | 0.28279700  | -2.69810600 |
| C   | 1.23976900  | 2.48407600  | 0.03140900  | C | 6.76615700  | -0.02968500 | -1.33722000 |
| O   | 0.13324500  | 1.71400400  | -0.21121200 | C | 7.46912900  | -0.17903800 | -0.14328900 |
| C   | -0.93078100 | 2.56327600  | -0.27828300 | C | 8.96346900  | -0.36300600 | -0.14519700 |
| C   | -0.52392400 | 3.89389100  | -0.09126000 | C | 6.74782800  | -0.16530400 | 1.04746200  |
| C   | -1.47864500 | 4.90722300  | -0.14894700 | C | 5.35734800  | -0.02669800 | 1.07171900  |
| C   | -2.80899400 | 4.55852800  | -0.37005800 | C | 4.67282600  | 0.01127700  | 2.41363600  |
| C   | -3.18315800 | 3.22170500  | -0.50344100 | H | 4.54090300  | 2.57840300  | 0.55317000  |
| C   | -2.25855500 | 2.15970400  | -0.46092600 | H | 4.02807100  | 4.97034900  | 0.75864500  |
|     |             |             |             | H | 1.71299000  | 5.82136700  | 0.47276100  |

|     |             |             |             |   |             |             |             |
|-----|-------------|-------------|-------------|---|-------------|-------------|-------------|
| H   | -1.19201600 | 5.94669500  | -0.02128000 | B | 2.19362200  | 0.02484200  | 1.06630500  |
| H   | -3.56578300 | 5.33360100  | -0.42499400 | C | 1.10620700  | -0.43782500 | 2.08923600  |
| H   | -4.23328800 | 2.98822000  | -0.65509300 | C | 0.28132600  | 0.45725000  | 2.78607700  |
| H   | 3.12755000  | -3.81507100 | -0.74329400 | F | 0.39757600  | 1.77661600  | 2.62057400  |
| H   | 2.89096800  | -2.24227900 | -1.51464300 | C | -0.71620700 | 0.05535600  | 3.65974700  |
| H   | 4.23777200  | -2.48363100 | -0.40153200 | F | -1.47815400 | 0.95543200  | 4.27778000  |
| H   | 1.81145700  | -4.37151600 | 0.97552300  | C | -0.94749600 | -1.29715600 | 3.85343800  |
| H   | 0.30802500  | -4.19712200 | 4.10706000  | F | -1.90347700 | -1.70151600 | 4.67730000  |
| H   | -1.04062500 | -3.96223100 | 2.99220700  | C | -0.17726700 | -2.22765700 | 3.17222900  |
| H   | 0.23237800  | -5.12519000 | 2.60038800  | C | 0.82974000  | -1.79446600 | 2.32606900  |
| H   | -0.00431300 | -1.48622700 | 3.54809900  | F | 1.53300100  | -2.75918100 | 1.73249700  |
| H   | 0.81468400  | 0.61343100  | 3.68520200  | F | -0.42894500 | -3.52701100 | 3.31785000  |
| H   | 0.20066500  | 1.19623200  | 2.14225200  | C | 2.50879700  | 1.54979100  | 0.81478200  |
| H   | 1.91259100  | 1.36092300  | 2.52699600  | C | 2.87607100  | 2.46022300  | 1.79898600  |
| H   | 5.43391700  | 0.27142700  | -3.50390700 | F | 2.97843200  | 2.05397600  | 3.06917300  |
| H   | 4.15589600  | 1.23354600  | -2.74922300 | C | 3.14798700  | 3.79100400  | 1.52358300  |
| H   | 3.96257500  | -0.50599000 | -2.89052200 | F | 3.50769500  | 4.63214000  | 2.49167400  |
| H   | 7.31405400  | -0.01572600 | -2.27700700 | C | 3.03245700  | 4.24973900  | 0.21699700  |
| H   | 9.22416400  | -1.41716000 | -0.29061900 | F | 3.26604600  | 5.52752800  | -0.06103800 |
| H   | 9.40472200  | -0.04117500 | 0.80140900  | C | 2.67025900  | 3.37355800  | -0.79560000 |
| H   | 9.43248100  | 0.20392100  | -0.95375900 | C | 2.43987400  | 2.04060700  | -0.48669100 |
| H   | 7.28069600  | -0.25637600 | 1.99173000  | F | 2.09341700  | 1.23093000  | -1.49257300 |
| H   | 5.40112000  | 0.20709000  | 3.20422800  | F | 2.53163100  | 3.81549800  | -2.04484500 |
| H   | 3.91355500  | 0.79661700  | 2.45009800  | C | -2.37111000 | 1.20687700  | -1.85229200 |
| H   | 4.17283400  | -0.93498800 | 2.64115700  | C | -1.91724800 | 2.46780500  | -2.30322500 |
|     |             |             |             | C | -0.49553900 | 2.93408500  | -2.09769000 |
| P21 |             |             |             | C | -2.79954000 | 3.32111000  | -2.96416400 |
| P   | -1.14225000 | 0.18525100  | -0.90781000 | C | -4.12616200 | 2.96703600  | -3.20267200 |
| C   | -0.73191200 | -1.10261000 | -2.16968300 | C | -5.06714500 | 3.92093900  | -3.88881600 |
| C   | -1.33851900 | -1.22229400 | -3.42474900 | C | -4.55165100 | 1.71194600  | -2.77906400 |
| C   | -0.81935300 | -2.08505100 | -4.38657800 | C | -3.70436000 | 0.82305400  | -2.11023600 |
| C   | 0.31979900  | -2.84049000 | -4.12115000 | C | -4.28102200 | -0.51706000 | -1.71951600 |
| C   | 0.95841000  | -2.74840500 | -2.88516800 | C | -2.20287800 | -0.50832700 | 0.45544600  |
| C   | 0.41204100  | -1.87325100 | -1.94737400 | C | -2.46133800 | -1.86626600 | 0.74648600  |
| O   | 1.01096800  | -1.74489800 | -0.71515000 | C | -1.85155900 | -3.02337200 | -0.00569400 |
| C   | 2.38817000  | -1.81211700 | -0.70895400 | C | -3.31112900 | -2.18742000 | 1.80894400  |
| C   | 3.03266200  | -0.96411400 | 0.18764000  | C | -3.91848200 | -1.22012100 | 2.60489800  |
| C   | 4.43111300  | -0.96700000 | 0.16915400  | C | -4.83647000 | -1.59533600 | 3.73685100  |
| C   | 5.12923800  | -1.81295800 | -0.68908100 | C | -3.61058000 | 0.11125400  | 2.34336800  |
| C   | 4.44047900  | -2.64752500 | -1.56684800 | C | -2.75166400 | 0.48254400  | 1.30735700  |
| C   | 3.04501200  | -2.66093600 | -1.59388100 | C | -2.43420400 | 1.95504600  | 1.17606800  |
| C   | 2.17761400  | -3.56709600 | -2.46304700 | H | -2.20969100 | -0.62021200 | -3.66171900 |
| C   | 2.94106400  | -4.12202300 | -3.66371700 | H | -1.30323300 | -2.16320300 | -5.35476300 |
| C   | 1.69098100  | -4.74106200 | -1.58451900 | H | 0.71147100  | -3.50282900 | -4.88591600 |



|     |             |             |             |   |             |             |             |
|-----|-------------|-------------|-------------|---|-------------|-------------|-------------|
| H   | 4.97833500  | -0.29878500 | 0.82929300  | C | -0.75636900 | 4.35952900  | -1.07296600 |
| H   | 6.21418100  | -1.81291700 | -0.68673100 | C | 0.62945400  | 4.43905900  | -0.95309600 |
| H   | 5.00074300  | -3.28727900 | -2.24106900 | C | 1.40229200  | 3.29829800  | -0.74188700 |
| H   | 3.79914100  | -4.71280200 | -3.33254200 | C | 2.92650900  | 3.27116700  | -0.76408500 |
| H   | 3.29887000  | -3.32358400 | -4.32091700 | C | 3.54371700  | 4.64121700  | -0.48851500 |
| H   | 2.30492900  | -4.79370800 | -4.24621800 | C | 3.35318600  | 2.80039200  | -2.17415200 |
| H   | 2.54378600  | -5.34497300 | -1.25838000 | B | -1.40459300 | 0.57820900  | -0.73962200 |
| H   | 1.17171800  | -4.37620400 | -0.69294600 | C | -2.87842000 | 0.55846900  | -0.17496600 |
| H   | 1.00429900  | -5.37814100 | -2.15097500 | C | -3.89655000 | -0.19146200 | -0.76412000 |
| H   | -0.35070100 | 3.91986600  | -2.54597800 | F | -3.64568400 | -0.91041600 | -1.86276100 |
| H   | -0.25114000 | 3.00540800  | -1.03171900 | C | -5.18882700 | -0.23457000 | -0.26713600 |
| H   | 0.22739700  | 2.24863600  | -2.54753700 | F | -6.13050400 | -0.95691200 | -0.87005500 |
| H   | -2.43868900 | 4.28886900  | -3.30589900 | C | -5.49495900 | 0.48098000  | 0.88297500  |
| H   | -5.91698200 | 3.39428900  | -4.32998400 | F | -6.72390400 | 0.44407200  | 1.38212800  |
| H   | -5.46449200 | 4.65389900  | -3.17817000 | C | -4.51249300 | 1.22915700  | 1.51386500  |
| H   | -4.55929000 | 4.47702500  | -4.68152200 | C | -3.23288200 | 1.26251500  | 0.97721800  |
| H   | -5.57622500 | 1.40465700  | -2.97926400 | F | -2.32358200 | 1.97737000  | 1.64483500  |
| H   | -5.12466500 | -0.76131400 | -2.37060000 | F | -4.80180900 | 1.90033500  | 2.62691700  |
| H   | -4.64568600 | -0.51182700 | -0.68684900 | C | -0.77078800 | -0.76523100 | -1.25211800 |
| H   | -3.54768000 | -1.32295400 | -1.79944300 | C | -1.10151800 | -2.00186000 | -0.69322400 |
| H   | -2.22452000 | -3.96686400 | 0.39939600  | F | -2.01557500 | -2.08560700 | 0.28160300  |
| H   | -0.76131300 | -3.02834300 | 0.09403500  | C | -0.47203500 | -3.18595100 | -1.04033600 |
| H   | -2.08672500 | -3.00042900 | -1.07341900 | F | -0.77633900 | -4.32894700 | -0.42430900 |
| H   | -3.49669400 | -3.23782400 | 2.02284500  | C | 0.53068400  | -3.16353100 | -1.99515700 |
| H   | -5.88192200 | -1.39833300 | 3.47628600  | F | 1.17481800  | -4.28150200 | -2.30863700 |
| H   | -4.60728800 | -1.01441900 | 4.63461500  | C | 0.87696600  | -1.96594100 | -2.60454500 |
| H   | -4.74736400 | -2.65572900 | 3.98493900  | C | 0.22681600  | -0.80191600 | -2.22973800 |
| H   | -4.02227900 | 0.88966700  | 2.98252500  | F | 0.60048700  | 0.31466100  | -2.85909900 |
| H   | -2.58519700 | 2.45241600  | 2.13767700  | F | 1.82845400  | -1.94706800 | -3.53616200 |
| H   | -1.39549600 | 2.12408400  | 0.87528400  | C | 3.05711900  | -2.91334600 | 1.63013000  |
| H   | -3.07350700 | 2.44663900  | 0.43525800  | C | 4.01703600  | -3.23084100 | 0.48127600  |
|     |             |             |             | C | 2.20940900  | -4.13973800 | 1.98144100  |
| P22 |             |             |             | C | 0.88107000  | -1.24273200 | 2.63488300  |
| P   | 1.90796700  | -1.54610900 | 1.08811000  | C | 1.67237700  | -1.05779200 | 3.92587100  |
| C   | 3.00804400  | -0.05737400 | 1.10678400  | C | -0.06963900 | -0.06851300 | 2.39484400  |
| C   | 4.20815100  | 0.05153500  | 1.81615500  | H | 4.54885600  | -0.78024600 | 2.42523200  |
| C   | 4.97077400  | 1.21474500  | 1.76715300  | H | 5.89247900  | 1.28224500  | 2.33585700  |
| C   | 4.55984000  | 2.28839800  | 0.98227500  | H | 5.16870500  | 3.18520800  | 0.94497900  |
| C   | 3.38569000  | 2.21498000  | 0.23422600  | H | -2.46302100 | 3.06655500  | -1.09993600 |
| C   | 2.62839200  | 1.04623100  | 0.33270700  | H | -1.33761700 | 5.25967400  | -1.24191900 |
| O   | 1.44226400  | 0.93562300  | -0.36016500 | H | 1.11296900  | 5.40686800  | -1.03698100 |
| C   | 0.73450700  | 2.07680300  | -0.62916400 | H | 3.21837300  | 5.36628000  | -1.23892000 |
| C   | -0.65629500 | 1.94135200  | -0.77476900 | H | 4.63330700  | 4.59087600  | -0.55890600 |
| C   | -1.38349700 | 3.12480200  | -0.98833000 | H | 3.27408800  | 5.01841700  | 0.50256500  |

|     |             |             |             |     |             |             |             |
|-----|-------------|-------------|-------------|-----|-------------|-------------|-------------|
| H   | 3.02298600  | 3.52365400  | -2.92687600 | C   | -1.84974400 | -4.10259500 | -1.38278800 |
| H   | 4.44230600  | 2.70459500  | -2.22844300 | H   | -1.23852000 | -4.99933700 | -1.38154300 |
| H   | 2.90705500  | 1.83013500  | -2.41378000 | C   | -1.24610400 | -2.85591300 | -1.50822000 |
| H   | 3.63556500  | -2.62765800 | 2.51619400  | H   | -0.16350300 | -2.77921300 | -1.58530700 |
| H   | 4.69581900  | -4.04350400 | 0.76186100  | B   | -0.04612600 | 0.18451700  | 0.25578700  |
| H   | 4.62451400  | -2.36420300 | 0.20255900  | C   | 2.57988400  | -0.02600500 | -0.78542400 |
| H   | 3.46169000  | -3.55068800 | -0.40839100 | F   | 2.68885100  | -2.16371200 | -1.78989000 |
| H   | 2.85258900  | -5.01030100 | 2.14924600  | C   | 3.31570300  | -1.12231200 | -1.23300600 |
| H   | 1.51689900  | -4.38971500 | 1.16783900  | F   | 5.36461800  | -2.25605400 | -1.53425700 |
| H   | 1.61875400  | -3.98452900 | 2.88959200  | C   | 4.69354700  | -1.19108100 | -1.10075100 |
| H   | 0.26975000  | -2.15217700 | 2.71483500  | F   | 6.69706400  | -0.19049700 | -0.37687500 |
| H   | 0.98916400  | -0.93090800 | 4.77358200  | C   | 5.37568000  | -0.13842900 | -0.50582700 |
| H   | 2.31365600  | -1.91665700 | 4.14762300  | F   | 5.32677600  | 1.98030000  | 0.51718900  |
| H   | 2.30357000  | -0.16437800 | 3.87420100  | C   | 4.67417300  | 0.96647800  | -0.04670500 |
| H   | -0.71224500 | 0.09126300  | 3.26736300  | F   | 2.65226500  | 2.08509100  | 0.26889000  |
| H   | 0.47321400  | 0.86505600  | 2.20829200  | C   | 3.29402500  | 1.00597400  | -0.18415800 |
| H   | -0.72189600 | -0.26711500 | 1.53898800  | C   | -0.23059800 | 1.62237600  | 0.95901800  |
|     |             |             |             | F   | 0.17139000  | 2.73663100  | -1.09060700 |
| P23 |             |             |             | C   | -0.11494000 | 2.80021500  | 0.21863900  |
| C   | 0.93216100  | -0.41581600 | -3.47076700 | F   | -0.17874800 | 5.15229700  | -0.02070900 |
| H   | 2.02256800  | -0.37539200 | -3.52971100 | C   | -0.29750600 | 4.06803300  | 0.74600000  |
| H   | 0.52650000  | 0.34249100  | -4.14808600 | F   | -0.79247800 | 5.40904200  | 2.62088800  |
| H   | 0.60178900  | -1.39534900 | -3.83361900 | C   | -0.60949100 | 4.20215000  | 2.09149300  |
| C   | 0.45656200  | -0.17925700 | -2.07683600 | F   | -1.03160500 | 3.18179300  | 4.16852000  |
| C   | 1.10581300  | 0.00671800  | -0.90377100 | C   | -0.73370600 | 3.06691000  | 2.87373700  |
| P   | -1.20655000 | -0.08667200 | -1.40129300 | F   | -0.67636500 | 0.77423400  | 3.13850900  |
| C   | -2.29806900 | 1.16073600  | -2.12026400 | C   | -0.54374100 | 1.81259000  | 2.30307900  |
| C   | -2.43567700 | 1.28867700  | -3.50638300 | C   | -0.35941200 | -1.12847800 | 1.14317600  |
| H   | -1.89521000 | 0.62144300  | -4.17288400 | F   | 1.80098100  | -2.09017600 | 0.98624400  |
| C   | -3.27221200 | 2.27012000  | -4.02661800 | C   | 0.51470300  | -2.18256900 | 1.36096500  |
| H   | -3.37815100 | 2.37578600  | -5.10141700 | F   | 1.01106400  | -4.36844800 | 2.12043000  |
| C   | -3.97390500 | 3.11524300  | -3.16813800 | C   | 0.12575800  | -3.38740100 | 1.93729500  |
| H   | -4.62530800 | 3.88049000  | -3.57806800 | F   | -1.58435800 | -4.72013100 | 2.85813800  |
| C   | -3.84764600 | 2.97988900  | -1.78813200 | C   | -1.19417800 | -3.56964100 | 2.31468900  |
| H   | -4.39957400 | 3.63554000  | -1.12266200 | F   | -3.38772900 | -2.71345900 | 2.45578200  |
| C   | -3.00807800 | 2.00342100  | -1.25895200 | C   | -2.10968100 | -2.54280000 | 2.11781700  |
| H   | -2.90299500 | 1.89280500  | -0.18242600 | F   | -2.59204900 | -0.39987000 | 1.34592600  |
| C   | -2.03422200 | -1.69807500 | -1.50685600 | C   | -1.66919700 | -1.35627900 | 1.55975200  |
| C   | -3.42282800 | -1.79457800 | -1.38180400 |     |             |             |             |
| H   | -4.03429400 | -0.89649300 | -1.37035600 | P24 |             |             |             |
| C   | -4.01867000 | -3.04590400 | -1.25223700 | P   | -1.09161200 | 1.11359900  | -0.23901300 |
| H   | -5.09612000 | -3.12066200 | -1.14740900 | B   | 0.09210600  | -0.46574200 | 0.53775800  |
| C   | -3.23400500 | -4.19702500 | -1.24817200 | C   | 0.40714200  | 1.11054300  | -1.27648300 |
| H   | -3.70177200 | -5.17021500 | -1.13874200 | C   | 1.05762700  | 0.09620800  | -0.65586400 |

|   |             |             |             |     |             |             |             |
|---|-------------|-------------|-------------|-----|-------------|-------------|-------------|
| C | -1.49133400 | 2.80486800  | 0.38054700  | H   | 0.77956000  | 5.18922500  | -3.47758000 |
| C | -2.74287900 | 3.43611200  | 0.17131900  | C   | 1.66349200  | 3.55053700  | -4.55690900 |
| C | -2.97121800 | 4.67888800  | 0.77018700  | H   | 1.98718800  | 4.16677400  | -5.38959000 |
| H | -3.93724100 | 5.15317400  | 0.61610200  | C   | 1.91419700  | 2.17941200  | -4.56222300 |
| C | -2.01463400 | 5.33609500  | 1.53476500  | H   | 2.42637600  | 1.72187300  | -5.40277900 |
| C | -0.76463500 | 4.73627600  | 1.65807000  | C   | 1.49832700  | 1.38936500  | -3.49716300 |
| H | 0.02218500  | 5.24753600  | 2.20778800  | H   | 1.67041100  | 0.31639300  | -3.51281400 |
| C | -0.47976200 | 3.49485700  | 1.09521300  | C   | 2.44476500  | -0.31555400 | -0.97094100 |
| C | -3.86105800 | 2.91561700  | -0.70312300 | C   | 3.48461700  | 0.61512400  | -1.03940300 |
| H | -4.58962700 | 3.71322600  | -0.86126700 | F   | 3.24603700  | 1.91307600  | -0.84004200 |
| H | -4.39055700 | 2.06808300  | -0.26080600 | C   | 4.79547200  | 0.24419400  | -1.29875100 |
| H | -3.50048700 | 2.59813800  | -1.68341900 | F   | 5.75826100  | 1.16242600  | -1.35231600 |
| C | -2.31557700 | 6.64888700  | 2.20384200  | C   | 5.10409800  | -1.09381800 | -1.49392800 |
| H | -2.59001300 | 6.48944300  | 3.25213400  | F   | 6.35665500  | -1.46225900 | -1.73936100 |
| H | -3.14765300 | 7.16289900  | 1.71699000  | C   | 4.09939900  | -2.04715900 | -1.42076600 |
| H | -1.44515700 | 7.30998800  | 2.19095300  | F   | 4.39234500  | -3.33367300 | -1.59724700 |
| C | 0.94624800  | 3.01836100  | 1.20727700  | C   | 2.79657800  | -1.65223500 | -1.15773200 |
| H | 1.50895300  | 3.30455200  | 0.31130100  | F   | 1.87002500  | -2.60593700 | -1.08058800 |
| H | 1.04898000  | 1.94132800  | 1.31079400  | C   | 0.69152500  | -0.37812000 | 2.03950000  |
| H | 1.42932100  | 3.48503800  | 2.06887900  | C   | 0.22717300  | 0.41199100  | 3.08484600  |
| C | -2.55433700 | 0.27603000  | -0.95100500 | F   | -0.79645900 | 1.26113500  | 2.89649500  |
| C | -2.72344600 | 0.01950000  | -2.32015200 | C   | 0.76924700  | 0.39005400  | 4.36257900  |
| C | -3.66869300 | -0.93228500 | -2.71198600 | F   | 0.28568600  | 1.18350700  | 5.31919200  |
| H | -3.77339000 | -1.15562300 | -3.77130500 | C   | 1.81941000  | -0.46940400 | 4.64478200  |
| C | -4.45711800 | -1.61392500 | -1.79080000 | F   | 2.35393300  | -0.50081900 | 5.86271500  |
| C | -4.34241100 | -1.26730600 | -0.44287000 | C   | 2.30542700  | -1.29525700 | 3.64322700  |
| H | -4.98260000 | -1.75383200 | 0.29007400  | F   | 3.30356500  | -2.14059900 | 3.90003600  |
| C | -3.40541200 | -0.33813000 | -0.00214100 | C   | 1.73320900  | -1.23505800 | 2.38088000  |
| C | -1.92292200 | 0.70983600  | -3.39013300 | F   | 2.21633700  | -2.08875600 | 1.46333800  |
| H | -0.96593300 | 0.20557100  | -3.55054100 | C   | -0.70320500 | -1.85075300 | 0.25979600  |
| H | -1.70958700 | 1.75350700  | -3.14259700 | C   | -1.33445100 | -2.57903500 | 1.26855100  |
| H | -2.46956300 | 0.69333100  | -4.33601000 | F   | -1.21726300 | -2.22009000 | 2.55779400  |
| C | -5.35773800 | -2.73944200 | -2.21901700 | C   | -2.16138200 | -3.67140400 | 1.03477300  |
| H | -6.27914800 | -2.76459300 | -1.63146200 | F   | -2.75148400 | -4.30340800 | 2.05075900  |
| H | -4.84680700 | -3.69810600 | -2.07105500 | C   | -2.38715400 | -4.08741300 | -0.26561200 |
| H | -5.62031500 | -2.66411200 | -3.27685000 | F   | -3.20894000 | -5.10442700 | -0.52084200 |
| C | -3.33987500 | -0.00500900 | 1.46691800  | C   | -1.76935300 | -3.41299200 | -1.30704800 |
| H | -3.52082100 | 1.06116400  | 1.64654600  | F   | -2.00557100 | -3.78339900 | -2.56665500 |
| H | -2.36704600 | -0.23576600 | 1.90934700  | C   | -0.94009700 | -2.33828700 | -1.02832900 |
| H | -4.09405200 | -0.57123400 | 2.01806500  | F   | -0.39662200 | -1.73851700 | -2.09886400 |
| C | 0.82955100  | 1.96038700  | -2.40555700 |     |             |             |             |
| C | 0.56557800  | 3.33469600  | -2.41716300 | P25 |             |             |             |
| H | 0.03313500  | 3.78964300  | -1.58680200 | B   | -0.06995500 | -0.79947400 | 0.68256000  |
| C | 0.98543700  | 4.12354100  | -3.48487300 | C   | 0.72266400  | 0.74231400  | 2.68063900  |

|   |             |             |             |   |             |             |             |
|---|-------------|-------------|-------------|---|-------------|-------------|-------------|
| C | 0.23052400  | -0.53686000 | 2.26924300  | C | 3.53147600  | 2.97128500  | -2.37030100 |
| C | 0.97195800  | 1.73953100  | 1.70159600  | C | 4.61047000  | 1.43500200  | -0.91279200 |
| C | 1.03433200  | 1.02942800  | 4.03715400  | C | 4.70492400  | 2.36506800  | -1.94281000 |
| C | 1.59921700  | 2.92065200  | 2.02803900  | H | 3.58553100  | 3.72865200  | -3.14842600 |
| H | 1.86381700  | 3.63516700  | 1.25235900  | H | 5.51535800  | 0.96494100  | -0.53380200 |
| C | 0.03816700  | -1.47187900 | 3.26411100  | C | -1.28193800 | 3.77099900  | 0.93232800  |
| H | -0.33577600 | -2.45761400 | 3.02037400  | H | -1.20149300 | 3.19884800  | 1.85811000  |
| C | 0.79348400  | 0.03043700  | 5.01528500  | H | -0.32427200 | 4.27208800  | 0.76795000  |
| H | 1.01652800  | 0.24351100  | 6.05698500  | H | -2.04137400 | 4.54244200  | 1.07293000  |
| C | 1.61242800  | 2.28295400  | 4.35619600  | C | -4.78766000 | 2.54339800  | -2.40083800 |
| H | 1.84980700  | 2.49652200  | 5.39516400  | H | -5.43947800 | 1.83986600  | -1.87031200 |
| C | 1.90665000  | 3.20149200  | 3.37575400  | H | -5.16884400 | 3.55085300  | -2.21920100 |
| H | 2.38305100  | 4.14187800  | 3.63213100  | H | -4.86510200 | 2.32727200  | -3.46888300 |
| C | 0.30354000  | -1.18716800 | 4.62902200  | C | -0.36578300 | 0.20143600  | -2.64997200 |
| H | 0.12406500  | -1.95965600 | 5.37045200  | H | 0.64894400  | 0.57759900  | -2.81454100 |
| C | 0.68469600  | -2.12120700 | 0.08406700  | H | -0.27468800 | -0.72508300 | -2.07479200 |
| C | 1.71165400  | -2.18061300 | -0.85074000 | H | -0.79116100 | -0.06051600 | -3.62076400 |
| C | 0.24305300  | -3.37904000 | 0.50370200  | C | 1.11910200  | 3.47450600  | -2.37433400 |
| C | 2.31838200  | -3.36051100 | -1.27285500 | H | 0.41667700  | 2.88080100  | -2.96336500 |
| C | 0.81177000  | -4.58062300 | 0.11588300  | H | 0.54404900  | 3.95089300  | -1.57751700 |
| C | 1.87430300  | -4.57299000 | -0.77725400 | H | 1.51011800  | 4.26281000  | -3.02011500 |
| C | -1.66331400 | -0.79876400 | 0.32234100  | C | 6.03269900  | 2.69537300  | -2.57008800 |
| C | -2.28093500 | -1.61387300 | -0.62890900 | H | 6.81948800  | 2.76569200  | -1.81459900 |
| C | -2.53157700 | 0.10505700  | 0.93627300  | H | 6.32757600  | 1.91524000  | -3.27931200 |
| C | -3.87011300 | 0.25310300  | 0.60645300  | H | 5.99101800  | 3.64189500  | -3.11334500 |
| C | -3.62455600 | -1.51983800 | -0.97388000 | C | 3.45095900  | 0.11641100  | 0.81730000  |
| C | -4.42562700 | -0.57514200 | -0.35539000 | H | 3.61275800  | 0.66079100  | 1.75458700  |
| P | 0.63359000  | 1.15401400  | 0.01864900  | H | 2.55132600  | -0.48339300 | 0.95072300  |
| C | -0.83560600 | 1.89954900  | -0.79103500 | H | 4.28576800  | -0.57439500 | 0.67749900  |
| C | -1.66031400 | 2.90008700  | -0.23956200 | F | -0.84893400 | -3.47989100 | 1.28189500  |
| C | -1.24543700 | 1.21542400  | -1.95852600 | F | 0.33153300  | -5.73771000 | 0.56831900  |
| C | -2.91579900 | 3.11615000  | -0.81284400 | F | 2.43951300  | -5.71242500 | -1.16364100 |
| C | -2.50232500 | 1.47800000  | -2.49615200 | F | 3.31308300  | -3.32395500 | -2.15927800 |
| C | -3.37483400 | 2.39032100  | -1.90730200 | F | 2.17653600  | -1.06554700 | -1.43751400 |
| H | -3.56608400 | 3.86448500  | -0.36654400 | F | -2.05916800 | 0.96806300  | 1.84835200  |
| H | -2.81697200 | 0.92968500  | -3.38149500 | F | -4.61281000 | 1.20315300  | 1.17396400  |
| C | 2.19842300  | 1.67076900  | -0.82927100 | F | -5.70393100 | -0.43556800 | -0.70460700 |
| C | 2.27622500  | 2.66039100  | -1.83607100 | F | -4.13865100 | -2.31598000 | -1.91107600 |
| C | 3.39135800  | 1.08323700  | -0.34165300 | F | -1.58767700 | -2.52317500 | -1.33326100 |

## 5. Coordinates of intermediates and transition states involved in Figure 2 and Figure 3.

1-methylpyrrole

N1\_TS

|   |            |            |             |
|---|------------|------------|-------------|
| C | 0.83433000 | 2.57940600 | -0.74319400 |
| C | 0.57604700 | 1.23561000 | -1.04785800 |
| C | 0.97720100 | 0.83996100 | -2.33879500 |

|   |             |             |             |      |             |             |             |
|---|-------------|-------------|-------------|------|-------------|-------------|-------------|
| C | 1.53890000  | 1.70876000  | -3.26381600 | H    | -1.43820400 | 0.92859900  | -3.13973900 |
| C | 1.74872400  | 3.04536000  | -2.92668800 | H    | -2.99911400 | 1.66564400  | -2.78441300 |
| C | 1.39879400  | 3.47539300  | -1.65578700 | C    | -5.71052200 | -1.82367700 | -0.94339400 |
| H | 0.84722100  | -0.20358000 | -2.61767400 | H    | -6.22725400 | -1.93287900 | 0.01484900  |
| H | 1.82388500  | 1.34378900  | -4.24593100 | H    | -6.28824500 | -1.13547400 | -1.56541000 |
| H | 2.18922400  | 3.73666400  | -3.63785400 | H    | -5.72273500 | -2.80388900 | -1.43195000 |
| H | 1.57109900  | 4.50801000  | -1.36221900 | C    | -1.40479200 | -2.15608700 | 1.51232700  |
| H | 0.20561300  | 1.72634000  | 1.27290000  | H    | -0.32664600 | -2.18431600 | 1.35891600  |
| B | -0.02051100 | 0.03353000  | -0.07725600 | H    | -1.60267900 | -1.65495500 | 2.46603500  |
| N | 0.51010700  | 3.05606300  | 0.59141200  | H    | -1.75677400 | -3.18709400 | 1.61384900  |
| C | -0.27649000 | 0.64526600  | 1.63191200  | H    | 1.90219000  | -4.27709600 | -1.34057700 |
| C | -1.58697000 | 1.08287500  | 1.99984700  | H    | -3.84355700 | -2.69446600 | 0.84375400  |
| C | -1.80783600 | 0.91905200  | 3.35682500  | H    | -4.40162500 | 0.16273700  | -2.26571500 |
| H | -2.29675300 | 1.47401500  | 1.28336300  | C    | 1.57232100  | 3.80501400  | 1.26491600  |
| H | -2.69478600 | 1.15806600  | 3.92375400  | H    | 1.35256300  | 3.84037200  | 2.33682000  |
| C | -0.64189900 | 0.34167200  | 3.85594000  | H    | 2.52906600  | 3.30517800  | 1.10928000  |
| H | -0.41053400 | 0.02194200  | 4.86392200  | H    | 1.64818500  | 4.83640000  | 0.89505300  |
| N | 0.25215900  | 0.17710400  | 2.87402300  | C    | -0.75571000 | 3.78962400  | 0.63041600  |
| C | 1.51179900  | -0.50825600 | 3.13062000  | H    | -1.06560100 | 3.92796900  | 1.67163700  |
| H | 2.35278000  | 0.18624700  | 3.11166300  | H    | -0.65796500 | 4.77034400  | 0.14540800  |
| H | 1.45072400  | -0.96249800 | 4.12015800  | H    | -1.52197400 | 3.21592500  | 0.10606000  |
| H | 1.67328200  | -1.28553200 | 2.38496200  | H    | 4.53282000  | -1.45746800 | 0.46444400  |
| C | -1.58030300 | -0.43522400 | -0.41396000 | C    | 2.94122500  | 0.57784600  | 0.61267100  |
| C | -2.15212400 | -1.46401500 | 0.38894400  | H    | 3.19276500  | 1.17789700  | -0.26943800 |
| C | -2.44671300 | 0.14715600  | -1.37279600 | H    | 2.17145200  | 1.12348300  | 1.15695400  |
| C | -3.46223600 | -1.89493200 | 0.20930800  | H    | 3.83296300  | 0.52279800  | 1.24553100  |
| C | -3.76834500 | -0.30983700 | -1.51703700 |      |             |             |             |
| C | -4.29962100 | -1.33228700 | -0.75009600 | N1_P |             |             |             |
| C | 1.17467600  | -1.12544800 | -0.20211400 | C    | 0.00068600  | -2.63584200 | -0.82676700 |
| C | 1.01511000  | -2.39578600 | -0.82168700 | C    | -0.25897100 | -1.27564400 | -1.01185400 |
| C | 2.50722600  | -0.80857200 | 0.18448200  | C    | -0.89369000 | -1.00579700 | -2.24604000 |
| C | 2.07608000  | -3.30949900 | -0.87279100 | C    | -1.20803400 | -1.97525300 | -3.18494200 |
| C | 3.53816000  | -1.74776700 | 0.12870600  | C    | -0.91125700 | -3.31683000 | -2.93892400 |
| C | 3.33827400  | -3.02900500 | -0.37040300 | C    | -0.30096200 | -3.64744500 | -1.74175500 |
| C | -0.24238400 | -2.86821400 | -1.52774700 | H    | -1.15403500 | 0.02688700  | -2.46162100 |
| H | -0.97526200 | -3.29819000 | -0.83950800 | H    | -1.69235800 | -1.68867700 | -4.11346100 |
| H | -0.75159300 | -2.06717200 | -2.06421500 | H    | -1.15575300 | -4.08736400 | -3.66215200 |
| H | 0.02619300  | -3.64525800 | -2.24851200 | H    | -0.06416700 | -4.68486700 | -1.51747500 |
| C | 4.44316800  | -4.05227600 | -0.38397200 | H    | 0.75043400  | -2.19334800 | 1.01754200  |
| H | 4.29202400  | -4.78791600 | -1.17803600 | B    | -0.00791600 | 0.05504200  | 0.00272000  |
| H | 5.41853000  | -3.58162700 | -0.53462500 | N    | 0.66006000  | -3.07219700 | 0.42371600  |
| H | 4.48602400  | -4.59788600 | 0.56511800  | C    | 0.33167700  | -0.39284500 | 1.59190900  |
| C | -2.08691200 | 1.27154900  | -2.32912400 | C    | 1.58897000  | -0.87242300 | 1.98490000  |
| H | -1.56565800 | 2.10309100  | -1.85430600 | C    | 1.60383500  | -1.11739800 | 3.38333500  |

|   |             |             |             |       |             |             |             |
|---|-------------|-------------|-------------|-------|-------------|-------------|-------------|
| H | 2.44230200  | -0.91738200 | 1.31772100  | C     | -0.13319300 | -4.02612500 | 1.23801200  |
| H | 2.42940400  | -1.46838400 | 3.98558300  | H     | 0.32432700  | -4.08602200 | 2.22776700  |
| C | 0.36474100  | -0.75122500 | 3.83793000  | H     | -1.15100100 | -3.64576200 | 1.31739400  |
| H | -0.04535600 | -0.73646600 | 4.83780200  | H     | -0.13781600 | -5.00756200 | 0.76161800  |
| N | -0.39467100 | -0.32397000 | 2.77453400  | C     | 2.05131500  | -3.54091700 | 0.20824300  |
| C | -1.67165200 | 0.33490500  | 3.02434100  | H     | 2.51791300  | -3.69817300 | 1.18278700  |
| H | -2.51835500 | -0.34289000 | 2.89750700  | H     | 2.03771200  | -4.46764400 | -0.36694800 |
| H | -1.66335700 | 0.69936900  | 4.05293600  | H     | 2.58820500  | -2.76663200 | -0.34095000 |
| H | -1.79938800 | 1.17972000  | 2.35122200  | H     | -4.80393200 | 0.27641300  | 0.36025600  |
| C | 1.40564000  | 0.88461500  | -0.36521700 | C     | -2.73088800 | -1.26671200 | 0.55468600  |
| C | 1.79053800  | 1.93120200  | 0.52574300  | H     | -2.75585500 | -1.90805700 | -0.33377600 |
| C | 2.33309000  | 0.59859100  | -1.39844000 | H     | -1.87203900 | -1.57353000 | 1.15478900  |
| C | 2.99474600  | 2.61426500  | 0.38735900  | H     | -3.64008800 | -1.46474600 | 1.13096000  |
| C | 3.54983700  | 1.29676500  | -1.49245200 |       |             |             |             |
| C | 3.90910400  | 2.30476300  | -0.61526600 | N2_TS |             |             |             |
| C | -1.45769600 | 0.87128700  | -0.17198200 | C     | 1.73143100  | 2.06520800  | -0.82767500 |
| C | -1.61562600 | 2.17160600  | -0.71537900 | C     | 0.45799600  | 1.51246700  | -1.05039800 |
| C | -2.67108600 | 0.19611400  | 0.15226400  | C     | -0.22679800 | 1.99535600  | -2.17441300 |
| C | -2.87918600 | 2.77913300  | -0.77902100 | C     | 0.30906800  | 2.96215100  | -3.01934200 |
| C | -3.90926700 | 0.83043600  | 0.07762800  | C     | 1.57026700  | 3.49230400  | -2.76001800 |
| C | -4.03865700 | 2.14428600  | -0.36414400 | C     | 2.28544800  | 3.04023500  | -1.65702100 |
| C | -0.49142300 | 2.98866400  | -1.32222100 | H     | -1.21777100 | 1.59530000  | -2.38133300 |
| H | 0.12913100  | 3.48342900  | -0.57006600 | H     | -0.25796000 | 3.30444700  | -3.87982000 |
| H | 0.18135300  | 2.37761300  | -1.92591500 | H     | 1.99711600  | 4.24714900  | -3.41254300 |
| H | -0.91541900 | 3.76677900  | -1.96275400 | H     | 3.27601100  | 3.43877300  | -1.45457300 |
| C | -5.38312500 | 2.82209600  | -0.41686400 | H     | 1.35493700  | 1.05643700  | 1.11716600  |
| H | -5.31057300 | 3.80590100  | -0.88673600 | B     | -0.14158200 | 0.36293100  | -0.04987600 |
| H | -6.10488300 | 2.22730200  | -0.98544400 | N     | 2.49798700  | 1.54579000  | 0.30901000  |
| H | -5.79697700 | 2.96026400  | 0.58738300  | C     | 0.11062600  | 1.06828900  | 1.52842600  |
| C | 2.12534400  | -0.40254600 | -2.52292200 | C     | -0.03843200 | 2.44345300  | 1.83493600  |
| H | 1.94029200  | -1.42442400 | -2.18533800 | C     | -0.51945400 | 2.60505600  | 3.13304700  |
| H | 1.27676500  | -0.13100300 | -3.15561200 | H     | 0.19815900  | 3.23517500  | 1.13541400  |
| H | 3.01259000  | -0.42364100 | -3.16068400 | H     | -0.72824600 | 3.52517500  | 3.65762500  |
| C | 5.21310900  | 3.04872000  | -0.74171700 | C     | -0.71873900 | 1.32015300  | 3.61969400  |
| H | 5.78882900  | 3.00084000  | 0.18802900  | H     | -1.12861700 | 0.99555400  | 4.56749800  |
| H | 5.82965600  | 2.63378200  | -1.54293300 | N     | -0.33966200 | 0.41572500  | 2.70061000  |
| H | 5.04375200  | 4.10766000  | -0.96245400 | C     | -0.61310100 | -1.00628700 | 2.87737500  |
| C | 0.92808900  | 2.38950000  | 1.68616000  | H     | 0.23721200  | -1.52471200 | 3.32757400  |
| H | -0.13854000 | 2.29329600  | 1.47572000  | H     | -1.48420200 | -1.10947800 | 3.52625100  |
| H | 1.14753100  | 1.81381100  | 2.59340700  | H     | -0.83813000 | -1.45588500 | 1.91210000  |
| H | 1.13196600  | 3.44194400  | 1.90572300  | C     | -1.74568400 | 0.03308400  | -0.17963500 |
| H | -2.94989000 | 3.78671700  | -1.18516200 | C     | -2.14817400 | -1.30988800 | -0.31264200 |
| H | 3.22889900  | 3.41203800  | 1.09152600  | C     | -2.79415600 | 0.98026100  | -0.12417500 |
| H | 4.23452200  | 1.04110700  | -2.29915200 | C     | -3.47021000 | -1.73954500 | -0.40174000 |

|   |             |             |             |      |             |             |
|---|-------------|-------------|-------------|------|-------------|-------------|
| C | -4.12363100 | 0.55390000  | -0.22716600 |      |             |             |
| C | -4.49014900 | -0.77991700 | -0.36253100 | N2_P |             |             |
| C | 0.80593800  | -0.97882500 | -0.22335000 | C    | -1.16048700 | -2.09798100 |
| C | 0.93019700  | -1.64612600 | -1.46537500 | C    | -0.13384600 | -1.14254000 |
| C | 1.60503700  | -1.48251600 | 0.81340300  | C    | 0.53415600  | -1.11459900 |
| C | 1.79281400  | -2.74031600 | -1.58727300 | C    | 0.24057100  | -1.97824900 |
| C | 2.46794800  | -2.57174300 | 0.70123400  | C    | -0.76086000 | -2.93660700 |
| C | 2.56447800  | -3.22380600 | -0.53358800 | C    | -1.47968800 | -2.98757900 |
| C | 0.19784900  | -1.19910400 | -2.70923300 | H    | 1.31860100  | -0.38077100 |
| H | 0.13757600  | -2.01698200 | -3.43262500 | H    | 0.79955500  | -1.90333900 |
| H | -0.81627700 | -0.86108700 | -2.48814500 | H    | -0.98967900 | -3.62158200 |
| H | 0.72027500  | -0.36464000 | -3.18968400 | H    | -2.28461500 | -3.70863000 |
| C | 3.47769300  | -4.40747400 | -0.71698200 | H    | -1.58859900 | -1.45528600 |
| H | 3.44986900  | -4.76841300 | -1.74745100 | B    | 0.17063800  | -0.08184300 |
| H | 4.51648400  | -4.15589200 | -0.47512200 | N    | -2.02004800 | -2.14294800 |
| H | 3.19254800  | -5.23834500 | -0.06172000 | C    | 0.10923300  | -0.92152600 |
| C | -2.59101600 | 2.46431900  | 0.08543800  | C    | -0.50823800 | -0.67697000 |
| H | -1.64668900 | 2.82551900  | -0.31831400 | C    | -0.16702800 | -1.69802600 |
| H | -3.39994900 | 3.02670300  | -0.39066000 | H    | -1.11041100 | 0.18726300  |
| H | -2.60503500 | 2.70728800  | 1.15336600  | H    | -0.48491300 | -1.78192600 |
| C | -5.93724700 | -1.18230400 | -0.47195800 | C    | 0.65990600  | -2.56089000 |
| H | -6.22217800 | -1.87577300 | 0.32726900  | H    | 1.16351200  | -3.45984800 |
| H | -6.59352900 | -0.31107600 | -0.41293600 | N    | 0.81728700  | -2.10925700 |
| H | -6.13912100 | -1.69341900 | -1.42012000 | C    | 1.78306800  | -2.73285700 |
| H | 1.86884200  | -3.23517000 | -2.55471100 | H    | 1.92358900  | -3.76874600 |
| H | -4.91092800 | 1.30658300  | -0.19525300 | H    | 2.74172500  | -2.21021400 |
| C | 3.54861200  | 0.61492300  | -0.15428700 | H    | 1.42581200  | -2.72969100 |
| H | 3.96714400  | 0.08536400  | 0.70567300  | C    | -1.05865100 | 1.02295200  |
| H | 3.12411500  | -0.11045200 | -0.84645800 | C    | -2.21501200 | 1.02987300  |
| H | 4.34415000  | 1.18080300  | -0.65713600 | C    | -1.05882900 | 1.97488300  |
| C | 3.11118300  | 2.57794000  | 1.15491000  | C    | -3.30589900 | 1.88679700  |
| H | 3.57344000  | 2.08545000  | 2.01468000  | C    | -2.14052000 | 2.84681200  |
| H | 3.88499000  | 3.13918600  | 0.61927500  | C    | -3.26752400 | 2.83122000  |
| H | 2.35006000  | 3.26990100  | 1.51418300  | C    | 1.67929700  | 0.58553000  |
| C | -3.79641400 | -3.20345200 | -0.54917900 | C    | 1.97315300  | 1.76590200  |
| H | -4.35337900 | -3.39986800 | -1.47242200 | C    | 2.77701600  | -0.02552600 |
| H | -2.88552000 | -3.80574800 | -0.57173100 | C    | 3.27684300  | 2.26789100  |
| H | -4.41968800 | -3.56318300 | 0.27780200  | C    | 4.08283300  | 0.46739000  |
| H | -1.37653600 | -2.07685400 | -0.36372600 | C    | 4.34052100  | 1.65480300  |
| C | 3.29347600  | -3.02372800 | 1.87836300  | C    | 5.72695100  | 2.24143600  |
| H | 4.36767500  | -2.95202000 | 1.67025600  | H    | 6.44418900  | 1.54456200  |
| H | 3.08114400  | -2.41596100 | 2.76217700  | H    | 5.74364600  | 3.16386600  |
| H | 3.09247000  | -4.07017600 | 2.13381100  | H    | 6.09763200  | 2.47253000  |
| H | 1.60804900  | -0.96935600 | 1.77333200  | C    | -4.40057200 | 3.80011300  |

|       |             |             |             |   |             |             |             |
|-------|-------------|-------------|-------------|---|-------------|-------------|-------------|
| H     | -4.20552600 | 4.44664900  | 1.55189300  | B | -0.06023700 | -0.42076400 | -0.03074500 |
| H     | -4.55043400 | 4.44078100  | -0.18308100 | N | 1.98015400  | -2.52689300 | -0.30096000 |
| H     | -5.34898100 | 3.28013800  | 0.87069200  | C | -0.14300500 | -1.34526900 | -1.44720600 |
| C     | -1.97162200 | -3.44013400 | -0.84222600 | C | -0.93460600 | -2.52963500 | -1.45293300 |
| H     | -2.48128500 | -3.31024700 | -1.79844400 | C | -1.62209800 | -2.64186300 | -2.65200800 |
| H     | -0.92698700 | -3.68864300 | -1.02068200 | H | -0.98708700 | -3.20900200 | -0.61232400 |
| H     | -2.46213400 | -4.20956200 | -0.24557700 | H | -2.29226800 | -3.42689600 | -2.96763000 |
| C     | -3.42008400 | -1.72699000 | 0.18210100  | C | -1.29010600 | -1.50289100 | -3.38554200 |
| H     | -3.94964400 | -1.59789100 | -0.76406700 | H | -1.63350800 | -1.19042400 | -4.36341800 |
| H     | -3.89616000 | -2.50578900 | 0.77932100  | N | -0.42640700 | -0.74730500 | -2.69828200 |
| H     | -3.38976100 | -0.78271900 | 0.72339700  | C | -0.01318800 | 0.57377900  | -3.15712200 |
| C     | 0.92976100  | 2.53017300  | -1.62046000 | H | -0.03909400 | 1.27640200  | -2.32345300 |
| H     | 0.30711700  | 1.85741400  | -2.21463100 | H | 0.99059000  | 0.54579100  | -3.57924800 |
| H     | 0.25753600  | 3.09165800  | -0.96410100 | H | -0.72126100 | 0.90811000  | -3.91609600 |
| H     | 1.41205800  | 3.23858900  | -2.29968700 | C | -1.54461700 | 0.27024000  | 0.10651000  |
| C     | 0.05106000  | 2.11162400  | 2.15753700  | C | -1.83520300 | 1.60117900  | -0.18761700 |
| H     | -0.07949500 | 1.38675200  | 2.96875100  | C | -2.66753300 | -0.48714300 | 0.44729900  |
| H     | 1.04013700  | 1.95414600  | 1.72641900  | C | -3.10883400 | 2.15427600  | -0.13386200 |
| H     | 0.02799400  | 3.10785700  | 2.60767600  | C | -3.95847400 | 0.02175700  | 0.51949900  |
| C     | -4.49611200 | 1.79715900  | -1.47041500 | C | -4.18333000 | 1.35847400  | 0.22909200  |
| H     | -5.41637100 | 1.56361600  | -0.92134800 | C | 1.16050800  | 0.68875400  | -0.01044100 |
| H     | -4.67435700 | 2.74441200  | -1.99136700 | C | 1.20509200  | 1.59212000  | 1.05309600  |
| H     | -4.34957600 | 1.02446300  | -2.23034700 | C | 2.24199000  | 0.78963200  | -0.87529900 |
| C     | 5.19251600  | -0.26565700 | 1.20391500  | C | 2.20602700  | 2.53344100  | 1.23542200  |
| H     | 5.99032700  | -0.55761500 | 0.51119000  | C | 3.27618400  | 1.71038700  | -0.73545700 |
| H     | 5.65887700  | 0.35755000  | 1.97575200  | C | 3.25683000  | 2.59495600  | 0.32904200  |
| H     | 4.81753200  | -1.17204600 | 1.68616600  | C | 3.35814600  | -2.02154800 | -0.15236300 |
| H     | 3.47297100  | 3.18127000  | -1.41551700 | H | 3.79826200  | -1.86498100 | -1.13874700 |
| H     | 2.62587100  | -0.95516400 | 1.05618300  | H | 3.33766900  | -1.07870400 | 0.39309800  |
| H     | -2.10006900 | 3.57667900  | 2.10366900  | H | 3.96348000  | -2.74084200 | 0.41303800  |
| H     | -2.29882800 | 0.32437600  | -1.53279700 | C | 2.00318100  | -3.85451300 | -0.93047200 |
| N3_TS |             |             |             | H | 0.98463500  | -4.22378800 | -1.05086200 |
| C     | 1.26941300  | -2.47784500 | 0.98107500  | H | 2.46529400  | -3.75956500 | -1.91653700 |
| C     | 0.30604800  | -1.47172100 | 1.16239000  | H | 2.58002000  | -4.57388400 | -0.33939000 |
| C     | -0.27752600 | -1.40087500 | 2.43465400  | F | 4.28386600  | 1.73193700  | -1.61017000 |
| C     | 0.05371000  | -2.28455700 | 3.45458200  | F | 4.23198800  | 3.48635900  | 0.48570700  |
| C     | 0.99314200  | -3.28818100 | 3.23107900  | F | 2.17427100  | 3.37454600  | 2.26750200  |
| C     | 1.60649700  | -3.38172900 | 1.98832200  | F | 0.22083900  | 1.59077300  | 1.96254200  |
| H     | -1.01500200 | -0.62575700 | 2.62339800  | F | 2.37546100  | -0.06160700 | -1.91967100 |
| H     | -0.42380300 | -2.19400600 | 4.42518100  | F | -0.86544300 | 2.45333300  | -0.57527300 |
| H     | 1.25449200  | -3.98583100 | 4.01999100  | F | -3.30196800 | 3.43933800  | -0.43240400 |
| H     | 2.35768500  | -4.14692200 | 1.81182700  | F | -5.41197600 | 1.86635500  | 0.28660700  |
| H     | 1.04639600  | -1.78872100 | -1.12850800 | F | -4.97936800 | -0.76472500 | 0.86177600  |
|       |             |             |             | F | -2.54889400 | -1.79465600 | 0.72756800  |



|      |             |             |             |       |             |             |             |
|------|-------------|-------------|-------------|-------|-------------|-------------|-------------|
|      |             |             |             | H     | 3.09302300  | 3.58355900  | 1.36567800  |
|      |             |             |             | H     | 3.08386300  | 4.23443300  | -0.29876800 |
| N3_P |             |             |             | H     | 1.56336600  | 4.15165600  | 0.64982900  |
| C    | 1.34216200  | 2.24624200  | -1.25107700 | F     | 4.20367300  | -1.77635000 | 1.60253700  |
| C    | 0.24316700  | 1.38060600  | -1.20232900 | F     | 4.02831600  | -3.64111900 | -0.39197700 |
| C    | -0.48277900 | 1.31274300  | -2.40358300 | F     | 1.92465100  | -3.55568600 | -2.11668300 |
| C    | -0.15665400 | 2.05746500  | -3.53021000 | F     | 0.03429200  | -1.69442700 | -1.85026000 |
| C    | 0.93607800  | 2.92057300  | -3.51177500 | F     | 2.36682300  | 0.09891100  | 1.86175500  |
| C    | 1.70167700  | 3.00995700  | -2.35856500 | F     | -1.11582000 | -2.45948200 | 0.47880800  |
| H    | -1.33292300 | 0.63968600  | -2.45104100 | F     | -3.63389900 | -3.24811600 | 0.36223800  |
| H    | -0.75793300 | 1.96517400  | -4.42904600 | F     | -5.63380000 | -1.47073200 | -0.15864800 |
| H    | 1.19707200  | 3.50852400  | -4.38480300 | F     | -5.01911600 | 1.15436400  | -0.56327600 |
| H    | 2.57191900  | 3.65973700  | -2.33522300 | F     | -2.49960000 | 1.98056200  | -0.46376300 |
| H    | 1.74567900  | 1.81232800  | 0.68932700  |       |             |             |             |
| B    | -0.12883200 | 0.42923900  | 0.10299900  |       |             |             |             |
| N    | 2.25611900  | 2.29965200  | -0.07468600 | N4_TS |             |             |             |
| C    | -0.16408500 | 1.32119900  | 1.46203000  | C     | -2.90388300 | -0.87641000 | -0.35543000 |
| C    | -0.35129400 | 2.69396500  | 1.58639300  | C     | -1.51955000 | -1.08317500 | -0.47394500 |
| C    | -0.51240100 | 3.01823400  | 2.95884900  | C     | -1.10187200 | -2.42039600 | -0.47416500 |
| H    | -0.46542600 | 3.36765100  | 0.74596500  | C     | -1.99724400 | -3.47896800 | -0.35810900 |
| H    | -0.68783500 | 3.99291200  | 3.39051100  | C     | -3.36129000 | -3.23113400 | -0.22592800 |
| C    | -0.43847700 | 1.83091100  | 3.64488700  | C     | -3.81938300 | -1.91875500 | -0.22445200 |
| H    | -0.51377100 | 1.61780700  | 4.70197400  | H     | -0.04045600 | -2.63503100 | -0.56854500 |
| N    | -0.24025500 | 0.81816100  | 2.74626800  | H     | -1.63077200 | -4.50092100 | -0.36284400 |
| C    | -0.14277000 | -0.57585500 | 3.13788500  | H     | -4.06482500 | -4.05158600 | -0.12859100 |
| H    | 0.86129700  | -0.81673100 | 3.49918000  | H     | -4.88193600 | -1.71330200 | -0.12961800 |
| H    | -0.86622900 | -0.77673500 | 3.93084000  | H     | -2.15328300 | 1.13588400  | 0.08032900  |
| H    | -0.37480300 | -1.21764700 | 2.28830900  | B     | -0.51905000 | 0.17799900  | -0.61208300 |
| C    | -1.65202200 | -0.19255200 | -0.02532500 | N     | -3.35598000 | 0.50810600  | -0.38647500 |
| C    | -2.03180100 | -1.51434500 | 0.18795900  | C     | -0.98351400 | 1.33883500  | 0.55317000  |
| C    | -2.72220100 | 0.67347200  | -0.26042300 | C     | -0.99615200 | 1.11312600  | 1.95205700  |
| C    | -3.34766600 | -1.96249200 | 0.15091600  | C     | -0.51301800 | 2.23982900  | 2.60893500  |
| C    | -4.04984200 | 0.27191600  | -0.31664900 | H     | -1.32704300 | 0.18599000  | 2.40233100  |
| C    | -4.36746500 | -1.06237500 | -0.11014700 | H     | -0.39680000 | 2.39509100  | 3.67111100  |
| C    | 1.04387200  | -0.74418500 | 0.06277400  | C     | -0.19677400 | 3.16551000  | 1.61178500  |
| C    | 1.03406800  | -1.69363100 | -0.96061200 | H     | 0.20980400  | 4.16473000  | 1.70033300  |
| C    | 2.15123700  | -0.83235400 | 0.89619400  | N     | -0.48384400 | 2.64600800  | 0.41243000  |
| C    | 2.00397100  | -2.67126100 | -1.12466000 | C     | -0.22732200 | 3.29388900  | -0.86236800 |
| C    | 3.15692400  | -1.78632100 | 0.77351100  | H     | 0.56485700  | 2.77188800  | -1.40261500 |
| C    | 3.07913100  | -2.72065600 | -0.24502400 | H     | -1.13095000 | 3.27868400  | -1.47534000 |
| C    | 3.54269400  | 1.59654300  | -0.35990600 | H     | 0.06412400  | 4.32844900  | -0.67646200 |
| H    | 4.06857000  | 1.42820600  | 0.58063400  | C     | 1.05649200  | -0.14380500 | -0.39153100 |
| H    | 3.31718000  | 0.65025500  | -0.84723800 | C     | 2.03606400  | 0.28385700  | -1.28223600 |
| H    | 4.13305600  | 2.22500100  | -1.02730400 | C     | 1.54289500  | -0.81548700 | 0.72795600  |
| C    | 2.51736400  | 3.67419500  | 0.44364300  | C     | 3.39631100  | 0.06401600  | -1.09621600 |

|      |             |             |             |       |             |             |             |
|------|-------------|-------------|-------------|-------|-------------|-------------|-------------|
| C    | 2.89047000  | -1.06168200 | 0.95616800  | C     | 2.19065400  | 0.96380700  | -0.77050800 |
| C    | 3.82611100  | -0.61754100 | 0.03199500  | C     | 1.57854200  | -1.10663700 | 0.12916900  |
| C    | -3.67567000 | 0.96596200  | -1.74461600 | C     | 3.51755400  | 0.75137300  | -0.42394400 |
| H    | -3.82211500 | 2.05041400  | -1.73313600 | C     | 2.89525400  | -1.36534700 | 0.49842400  |
| H    | -2.84401900 | 0.71844200  | -2.40457400 | C     | 3.87458300  | -0.42874400 | 0.21601900  |
| H    | -4.59075200 | 0.48396600  | -2.11225900 | C     | -3.41284700 | 0.25098000  | 1.75669400  |
| C    | -4.40464300 | 0.84598500  | 0.57516700  | H     | -3.20673800 | 1.00302400  | 2.51991300  |
| H    | -4.10793400 | 0.48947800  | 1.56354500  | H     | -3.83027200 | 0.73313300  | 0.87351600  |
| H    | -4.51322300 | 1.93366300  | 0.60588600  | H     | -4.09391000 | -0.51200400 | 2.13569800  |
| H    | -5.37279100 | 0.40701600  | 0.30667800  | C     | -1.48102500 | -1.09231800 | 2.50248700  |
| F    | 1.70191400  | 0.96913600  | -2.39130500 | H     | -1.30903500 | -0.37197900 | 3.30466800  |
| F    | 4.28879600  | 0.50118600  | -1.98722900 | H     | -2.14405600 | -1.88873600 | 2.84400000  |
| F    | 5.12484600  | -0.83883000 | 0.22886500  | H     | -0.54179100 | -1.51360100 | 2.14851500  |
| F    | 3.29437400  | -1.71237500 | 2.04876800  | F     | 1.91137700  | 2.11941200  | -1.38400400 |
| F    | 0.69012800  | -1.26504400 | 1.66281000  | F     | 4.45379300  | 1.66181600  | -0.69655900 |
| H    | -0.67655400 | 0.71975600  | -1.68410000 | F     | 5.14263000  | -0.65041100 | 0.56104500  |
|      |             |             |             | F     | 3.21662200  | -2.50308400 | 1.12081400  |
|      |             |             |             | F     | 0.69193200  | -2.07498400 | 0.45762800  |
|      |             |             |             | H     | -0.28544900 | 0.76131500  | -2.17312000 |
| N4_P |             |             |             |       |             |             |             |
| C    | -2.20753800 | -1.19624000 | 0.13334300  |       |             |             |             |
| C    | -1.39065300 | -0.83643800 | -0.94180600 |       |             |             |             |
| C    | -1.52359500 | -1.66792200 | -2.06726200 |       |             |             |             |
| C    | -2.37878100 | -2.76280100 | -2.10313600 | N5_TS |             |             |             |
| C    | -3.16559100 | -3.07613000 | -0.99550800 | B     | -0.37502400 | -0.02457900 | -0.06478700 |
| C    | -3.08090500 | -2.28079100 | 0.13875800  | C     | 0.62145300  | -0.46510400 | -1.30480600 |
| H    | -0.92352500 | -1.42978900 | -2.94126100 | C     | -0.03634100 | -0.80500000 | -2.50179400 |
| H    | -2.43711300 | -3.37535400 | -2.99761200 | H     | -1.11395900 | -0.66286700 | -2.55016300 |
| H    | -3.83673900 | -3.92791900 | -1.01368900 | C     | 0.60873500  | -1.31462600 | -3.61643100 |
| H    | -3.68393800 | -2.51201900 | 1.01349600  | H     | 0.04418600  | -1.55757600 | -4.51106700 |
| H    | -1.49400300 | 0.43356200  | 1.12232200  | C     | 1.98409600  | -1.52090300 | -3.56996300 |
| B    | -0.34834100 | 0.43572000  | -1.00429200 | H     | 2.51525200  | -1.93463200 | -4.42116200 |
| N    | -2.12271700 | -0.37865300 | 1.36719700  | C     | 2.67838800  | -1.17392600 | -2.42142700 |
| C    | -0.87538900 | 1.69138700  | -0.12456200 | H     | 3.75149600  | -1.30837500 | -2.39911300 |
| C    | -0.46696600 | 2.21487100  | 1.10125000  | C     | 2.01967900  | -0.63960800 | -1.30325400 |
| C    | -1.37661800 | 3.24010800  | 1.49167300  | N     | 2.80517300  | -0.20194300 | -0.14569100 |
| H    | 0.42507300  | 1.90188400  | 1.63041800  | C     | 3.65522100  | -1.24253500 | 0.55513100  |
| H    | -1.33001500 | 3.86077000  | 2.37489600  | C     | 4.09258700  | -0.61826400 | 1.89224000  |
| C    | -2.32074600 | 3.32213300  | 0.49697900  | H     | 3.19401600  | -0.41454800 | 2.49390600  |
| H    | -3.17275900 | 3.97729100  | 0.38037600  | H     | 4.68387600  | -1.35999900 | 2.44011700  |
| N    | -2.02346700 | 2.38187800  | -0.45757400 | C     | 4.86964600  | 0.67763700  | 1.70610100  |
| C    | -2.75530700 | 2.19884700  | -1.69751000 | H     | 5.79513700  | 0.48567900  | 1.14977200  |
| H    | -3.04992000 | 1.15232400  | -1.81759800 | H     | 5.16984400  | 1.08413700  | 2.67686500  |
| H    | -3.64810500 | 2.82607500  | -1.67653100 | C     | 3.98747900  | 1.68265400  | 0.97391500  |
| H    | -2.13455500 | 2.47881900  | -2.55128800 | H     | 4.53157900  | 2.61350500  | 0.77832200  |
| C    | 1.16515100  | 0.05107600  | -0.51605000 | H     | 3.14494900  | 1.93552700  | 1.62408100  |
|      |             |             |             | C     | 3.45857200  | 1.15991100  | -0.37338300 |

|   |             |             |             |      |             |             |             |
|---|-------------|-------------|-------------|------|-------------|-------------|-------------|
| C | 4.61282100  | 1.20212500  | -1.39715300 | H    | 0.96757600  | 2.30930100  | 1.45882200  |
| H | 5.55930800  | 0.81997300  | -1.01570200 | H    | 0.99519300  | 2.12274300  | 4.11836700  |
| H | 4.77927600  | 2.25355600  | -1.65122400 | H    | 0.33294300  | -0.45581400 | 4.67761600  |
| H | 4.35857100  | 0.68585500  | -2.32331000 | C    | -0.28078600 | -2.03129100 | 2.65709400  |
| C | 2.39672600  | 2.11919600  | -0.92217600 | H    | -0.02806100 | -2.45633200 | 3.62975200  |
| H | 1.44876200  | 2.03537900  | -0.39582500 | H    | -1.36690500 | -1.98349000 | 2.54861100  |
| H | 2.19223500  | 1.92906700  | -1.97753600 | H    | 0.13090500  | -2.66178400 | 1.87599100  |
| H | 2.76285700  | 3.14536200  | -0.81948100 |      |             |             |             |
| C | 4.88822500  | -1.77793800 | -0.20402900 | N5_P |             |             |             |
| H | 4.59169700  | -2.49133600 | -0.97507400 | B    | -0.45844400 | -0.01883900 | 0.05955200  |
| H | 5.51126800  | -2.32376900 | 0.51186700  | C    | 0.51780800  | -0.52267100 | -1.22104200 |
| H | 5.50882800  | -1.01301800 | -0.66191000 | C    | -0.19543400 | -0.76302300 | -2.41698100 |
| C | 2.79391000  | -2.46447900 | 0.86071700  | H    | -1.26087600 | -0.55153700 | -2.41887900 |
| H | 2.39704700  | -2.91519700 | -0.04991500 | C    | 0.37113100  | -1.23875100 | -3.58583200 |
| H | 1.96785700  | -2.19868500 | 1.51671300  | H    | -0.24741900 | -1.39641200 | -4.46366400 |
| H | 3.40971300  | -3.20663100 | 1.37748600  | C    | 1.73461400  | -1.51761800 | -3.62472900 |
| C | -1.07294600 | 1.46106000  | -0.26485100 | H    | 2.20339800  | -1.90884600 | -4.52120900 |
| C | -0.95477200 | 2.31538500  | -1.35555100 | C    | 2.49385200  | -1.27297200 | -2.49450900 |
| F | -0.23533200 | 1.98639100  | -2.43861400 | H    | 3.55630300  | -1.46965900 | -2.52102000 |
| C | -1.53541000 | 3.58362800  | -1.40782200 | C    | 1.89502900  | -0.77130800 | -1.33108700 |
| F | -1.36870600 | 4.35496100  | -2.48319800 | N    | 2.80667500  | -0.46468200 | -0.19241800 |
| C | -2.28004400 | 4.04386500  | -0.33855700 | C    | 3.47401900  | -1.69425100 | 0.49029900  |
| F | -2.83966100 | 5.25077300  | -0.37044000 | C    | 4.08768100  | -1.17312900 | 1.79775000  |
| C | -2.43456200 | 3.22806900  | 0.77683900  | H    | 3.27289600  | -0.85955400 | 2.46469800  |
| F | -3.15516300 | 3.65399800  | 1.81548600  | H    | 4.58898100  | -2.01774000 | 2.28126700  |
| C | -1.84047600 | 1.98005400  | 0.78247100  | C    | 5.04868200  | -0.00618900 | 1.60071500  |
| F | -2.04021800 | 1.23221700  | 1.88139600  | H    | 5.91464500  | -0.31073200 | 1.00098900  |
| C | -1.55102900 | -1.21507700 | -0.02798000 | H    | 5.44111500  | 0.31289400  | 2.57047900  |
| C | -2.93860500 | -1.04367000 | 0.00545000  | C    | 4.31053300  | 1.15744900  | 0.94584300  |
| F | -3.51819300 | 0.16015400  | 0.07512200  | H    | 4.98020600  | 2.00888700  | 0.78634800  |
| C | -3.85964700 | -2.09046900 | -0.05850600 | H    | 3.51471900  | 1.49368000  | 1.61926100  |
| F | -5.16569700 | -1.83027000 | -0.01039300 | C    | 3.69444800  | 0.80349400  | -0.41645300 |
| C | -3.42374200 | -3.39519200 | -0.18903200 | C    | 4.79585900  | 0.66000600  | -1.46878300 |
| F | -4.28831400 | -4.40315100 | -0.25093500 | H    | 5.60798200  | -0.00567100 | -1.18294400 |
| C | -2.05839200 | -3.62923600 | -0.25241200 | H    | 5.22975100  | 1.65735100  | -1.58440800 |
| F | -1.59936100 | -4.87577200 | -0.37196000 | H    | 4.40506300  | 0.37176700  | -2.44355000 |
| C | -1.18412100 | -2.55682100 | -0.18599000 | C    | 2.76223500  | 1.91892800  | -0.88879800 |
| F | 0.11780600  | -2.90059100 | -0.22345400 | H    | 1.87129300  | 2.00347000  | -0.26609100 |
| H | 1.60477300  | -0.04349200 | 0.85310800  | H    | 2.43561600  | 1.76325700  | -1.91777000 |
| C | 0.48590900  | 0.13790200  | 1.43889200  | H    | 3.30843900  | 2.86463800  | -0.83251500 |
| C | 0.76671600  | 1.41449300  | 2.03016000  | C    | 4.51132200  | -2.43119600 | -0.36108800 |
| C | 0.78569000  | 1.33753300  | 3.40812600  | H    | 4.04392400  | -2.95749700 | -1.19367800 |
| C | 0.45835900  | 0.01570400  | 3.71105700  | H    | 4.95611800  | -3.19108500 | 0.28780200  |
| N | 0.27917100  | -0.68641200 | 2.59118700  | H    | 5.32412400  | -1.81505200 | -0.73915700 |

|       |             |             |             |      |             |             |             |
|-------|-------------|-------------|-------------|------|-------------|-------------|-------------|
| C     | 2.36407100  | -2.68775200 | 0.81716300  | C    | -3.23806600 | -1.57443100 | 0.24073200  |
| H     | 1.58812600  | -2.22476800 | 1.42801100  | C    | -3.53482300 | -0.49749500 | -0.59163500 |
| H     | 2.80667600  | -3.51020100 | 1.38653900  | C    | -2.61786800 | 0.54089400  | -0.71914500 |
| H     | 1.90907900  | -3.09363600 | -0.08678900 | H    | -1.79413500 | -2.47439100 | 1.55055700  |
| C     | -0.89067300 | 1.57291900  | -0.15497000 | H    | -3.94928700 | -2.38872300 | 0.34373400  |
| C     | -0.57430800 | 2.41396400  | -1.21705100 | H    | -4.47209800 | -0.46359500 | -1.13781000 |
| F     | 0.11016300  | 1.97970200  | -2.29184900 | H    | -2.83865900 | 1.38714000  | -1.36397500 |
| C     | -0.90203500 | 3.76941500  | -1.26193200 | H    | 0.74452500  | 0.74817300  | 0.19499300  |
| F     | -0.54141100 | 4.51389100  | -2.31081100 | B    | 0.35950700  | -0.66928000 | 1.58208400  |
| C     | -1.59746500 | 4.34174900  | -0.21449700 | N    | -0.43053700 | 1.53833600  | -0.11327400 |
| F     | -1.91999800 | 5.63340600  | -0.23900700 | H    | 0.63364100  | -1.81105000 | 1.88560000  |
| C     | -1.95506600 | 3.54620600  | 0.86755100  | C    | 1.60108500  | -0.12682600 | 0.52628000  |
| F     | -2.63716100 | 4.07843100  | 1.88260200  | C    | 2.81309900  | 0.47421800  | 0.93155600  |
| C     | -1.60248600 | 2.20773300  | 0.87077800  | C    | 3.85357200  | 0.02959100  | 0.11724800  |
| F     | -2.00886400 | 1.50056500  | 1.93272600  | H    | 2.88499800  | 1.16979500  | 1.75775600  |
| C     | -1.79792800 | -1.01087500 | -0.04772200 | H    | 4.89842200  | 0.29850600  | 0.16219500  |
| C     | -3.14113800 | -0.63181400 | -0.06685400 | H    | 0.42432300  | 0.08283100  | 2.53345600  |
| F     | -3.52500000 | 0.64828900  | 0.00921200  | C    | 3.27949700  | -0.85332900 | -0.79692000 |
| C     | -4.20062000 | -1.53168400 | -0.18924500 | H    | 3.74070200  | -1.42307700 | -1.59341200 |
| F     | -5.45687100 | -1.08695400 | -0.19810200 | N    | 1.96082900  | -0.93249400 | -0.56964400 |
| C     | -3.95173500 | -2.88590100 | -0.32004900 | C    | 1.04119000  | -1.82169100 | -1.25523700 |
| F     | -4.95326200 | -3.75404700 | -0.43746600 | H    | 1.58112500  | -2.35432700 | -2.03922700 |
| C     | -2.63415300 | -3.31984300 | -0.32930900 | H    | 0.62118500  | -2.53272700 | -0.53967100 |
| F     | -2.35634100 | -4.61955200 | -0.45090500 | H    | 0.21739100  | -1.25570300 | -1.69714900 |
| C     | -1.61818500 | -2.38636800 | -0.20821200 | C    | -0.28464100 | 2.15829000  | -1.42705700 |
| F     | -0.37201000 | -2.90343700 | -0.20582300 | H    | 0.64998100  | 2.72622700  | -1.44217500 |
| H     | 2.15460200  | -0.14311700 | 0.55439600  | H    | -0.24145600 | 1.37934200  | -2.19107900 |
| C     | 0.21197800  | -0.02834400 | 1.57182800  | H    | -1.11141000 | 2.84197200  | -1.65874500 |
| C     | 1.00244900  | 0.99506100  | 2.09646000  | C    | -0.53217900 | 2.53406000  | 0.96021500  |
| C     | 1.33217900  | 0.71186800  | 3.44626600  | H    | 0.36603800  | 3.15932200  | 0.95253700  |
| C     | 0.72509200  | -0.48151000 | 3.73715100  | H    | -1.41765200 | 3.16751800  | 0.81974900  |
| N     | 0.05290900  | -0.92069000 | 2.62321600  | H    | -0.59957400 | 2.01413500  | 1.91584300  |
| H     | 1.22212700  | 1.92091800  | 1.58342300  |      |             |             |             |
| H     | 1.91595800  | 1.31750600  | 4.12454500  | N6_P |             |             |             |
| H     | 0.69356100  | -1.05505000 | 4.65227200  | C    | -1.11546300 | -1.01535800 | 0.18593600  |
| C     | -0.79951400 | -2.09786800 | 2.69539500  | C    | -1.56443500 | 0.30741700  | 0.12799200  |
| H     | -0.72518800 | -2.50269600 | 3.70529200  | C    | -2.85586700 | 0.70583200  | -0.19879600 |
| H     | -1.83947100 | -1.83026800 | 2.50067200  | C    | -3.78633300 | -0.27832700 | -0.51149000 |
| H     | -0.48325300 | -2.86605900 | 1.98880500  | C    | -3.39670200 | -1.61644800 | -0.48610700 |
|       |             |             |             | C    | -2.09360500 | -1.96631400 | -0.14615900 |
| N6_TS |             |             |             | H    | -3.14463400 | 1.75291900  | -0.21501400 |
| C     | -1.42174700 | 0.48244300  | -0.00613700 | H    | -4.80155100 | -0.00095800 | -0.77428900 |
| C     | -1.07368400 | -0.59153700 | 0.83011700  | H    | -4.11747300 | -2.39005900 | -0.73400400 |
| C     | -2.02670600 | -1.61516500 | 0.92612100  | H    | -1.80547100 | -3.01336900 | -0.13049700 |

|       |             |             |             |   |             |             |             |
|-------|-------------|-------------|-------------|---|-------------|-------------|-------------|
| N     | -0.55625700 | 1.33779700  | 0.49340900  | C | -1.71930100 | -3.30819600 | -0.12669900 |
| B     | 0.39465200  | -1.41834100 | 0.64930800  | C | -2.56245200 | -2.03914100 | -2.56365600 |
| H     | 0.35607700  | 0.85889200  | 0.27371200  | C | -3.87954300 | -0.32116600 | -1.33704800 |
| H     | 0.53943100  | -2.62277800 | 0.57544900  | O | -1.94907400 | -1.15433400 | 0.94968300  |
| H     | 0.53286600  | -1.08680100 | 1.82680500  | O | -1.46319600 | -0.40932700 | -1.20139100 |
| C     | 1.50571200  | -0.63161800 | -0.23852600 | B | -1.06691100 | -0.29183300 | 0.19342000  |
| C     | 1.43360500  | 0.06315300  | -1.44628500 | N | 0.48520600  | 1.96293900  | -1.16191900 |
| C     | 2.72301500  | 0.57097600  | -1.77051300 | H | 5.05025900  | -1.91753300 | 1.93105700  |
| H     | 0.54074200  | 0.12618900  | -2.05866500 | H | 4.83840900  | -3.02723300 | 0.58598900  |
| C     | 3.55991900  | 0.17614900  | -0.75611300 | H | 6.08108700  | -0.37860900 | 0.46154900  |
| H     | 3.00913600  | 1.13345300  | -2.64770200 | H | 5.77167300  | -1.44478700 | -0.89960600 |
| H     | 4.61827600  | 0.33710600  | -0.60591000 | H | 5.03250700  | 1.44875000  | -1.73121600 |
| N     | 2.82385200  | -0.53358100 | 0.15694100  | H | 2.85907500  | 2.57931800  | -2.10301400 |
| C     | 3.34994300  | -1.11605800 | 1.37377900  | H | -0.04776100 | -2.17988400 | 1.74807200  |
| H     | 3.05545400  | -0.53489000 | 2.25327800  | H | 2.20240700  | -3.09802100 | 2.17721000  |
| H     | 2.96356700  | -2.12985700 | 1.49095400  | H | -1.06569800 | 2.25120800  | -2.53988100 |
| H     | 4.43933800  | -1.14636600 | 1.31235200  | H | 0.57486500  | 2.28039900  | -3.25526100 |
| C     | -0.57532700 | 2.56128600  | -0.34429300 | H | -0.17571900 | 0.73028300  | -2.71936800 |
| H     | 0.32663400  | 3.13537400  | -0.12862900 | H | -0.41153500 | 3.80068900  | -0.75213200 |
| H     | -0.58025000 | 2.26058600  | -1.39072600 | H | 1.18475100  | 3.94918300  | -1.53781700 |
| H     | -1.45884800 | 3.15488300  | -0.10979800 | H | 1.06791600  | 3.46704700  | 0.17749400  |
| C     | -0.59952600 | 1.65080800  | 1.94695900  | H | -3.79330600 | -3.03962000 | 1.50861800  |
| H     | 0.22577000  | 2.32259100  | 2.19011700  | H | -4.50198700 | -3.04841500 | -0.11668900 |
| H     | -1.55713300 | 2.12530500  | 2.16775100  | H | -4.52565200 | -1.56455500 | 0.86670800  |
| H     | -0.49798200 | 0.71098400  | 2.48751400  | H | -1.55999700 | -3.76023600 | 0.85671600  |
|       |             |             |             | H | -2.21306500 | -4.04665300 | -0.76627000 |
|       |             |             |             | H | -0.74313000 | -3.06618400 | -0.55492100 |
| N7_TS |             |             |             | H | -2.64200000 | -1.37556700 | -3.43025200 |
| C     | 4.64814900  | -2.00178300 | 0.91651400  | H | -3.38325200 | -2.76275500 | -2.61349200 |
| C     | 5.30039500  | -0.95858500 | -0.03964300 | H | -1.61336600 | -2.57328500 | -2.63049200 |
| C     | 4.13147300  | 1.04059400  | -1.28376700 | H | -3.75046200 | 0.41466200  | -2.13782400 |
| C     | 2.88578800  | 1.67735300  | -1.49745600 | H | -4.77967000 | -0.90595200 | -1.55152300 |
| C     | 1.70824100  | 1.20687800  | -0.95475000 | H | -4.02467100 | 0.20713300  | -0.39275900 |
| C     | 0.52698800  | -0.62326100 | 0.44300000  | H | -0.47118800 | 1.57566600  | -0.18810000 |
| C     | 0.80230100  | -1.70622400 | 1.26603200  | C | -1.39015300 | 1.39881000  | 0.68069800  |
| C     | 2.09228800  | -2.24430500 | 1.51351900  | C | -2.49539800 | 2.18250700  | 0.29095500  |
| C     | 4.15521300  | -0.07327400 | -0.48701100 | C | -2.87998300 | 3.01351800  | 1.34738900  |
| C     | 1.67048600  | 0.01791500  | -0.15893000 | C | -2.00542900 | 2.73584700  | 2.39100600  |
| C     | 3.16898600  | -1.67665400 | 0.88976400  | N | -1.11612600 | 1.80762700  | 1.99211700  |
| C     | 2.94616400  | -0.55408200 | 0.06306800  | H | -2.94132900 | 2.14166500  | -0.69346300 |
| C     | -0.07214900 | 1.79355600  | -2.51395600 | H | -3.68576600 | 3.73213600  | 1.37140100  |
| C     | 0.59920200  | 3.38337600  | -0.80505700 | H | -1.96662500 | 3.14107700  | 3.39358500  |
| C     | -2.57861600 | -2.04913700 | 0.03787700  | C | -0.10560200 | 1.22887100  | 2.86252800  |
| C     | -2.63669200 | -1.21363000 | -1.28361800 | H | -0.08345400 | 1.79939500  | 3.79235200  |
| C     | -3.93786200 | -2.44454200 | 0.60252400  |   |             |             |             |

|      |             |             |             |       |             |             |             |
|------|-------------|-------------|-------------|-------|-------------|-------------|-------------|
| H    | -0.34522500 | 0.18459000  | 3.07276700  | H     | -4.48199600 | -1.95989000 | 0.87627700  |
| H    | 0.87609600  | 1.26910300  | 2.38603600  | H     | -1.26596600 | -3.76985100 | 0.56980400  |
|      |             |             |             | H     | -1.93419400 | -3.92687800 | -1.06617000 |
| N7_P |             |             |             | H     | -0.58257800 | -2.81101900 | -0.75154900 |
| C    | 4.64790400  | -1.82424300 | 0.93931100  | H     | -2.74390000 | -0.94346900 | -3.32629800 |
| C    | 5.21935400  | -0.84239800 | -0.12618700 | H     | -3.37687300 | -2.47221400 | -2.69661300 |
| C    | 3.91503600  | 0.92632100  | -1.56133800 | H     | -1.62293900 | -2.18467500 | -2.73476900 |
| C    | 2.63390700  | 1.47031800  | -1.80858300 | H     | -3.91410500 | 0.55518200  | -1.76795000 |
| C    | 1.50987200  | 1.02431500  | -1.15046300 | H     | -4.83471800 | -0.87035100 | -1.25712800 |
| C    | 0.46242300  | -0.61776500 | 0.56259600  | H     | -4.02893500 | 0.15506200  | -0.04087900 |
| C    | 0.81476000  | -1.62813300 | 1.44607900  | H     | -0.52630400 | 1.26295100  | -0.94542300 |
| C    | 2.13140000  | -2.10386500 | 1.66958900  | C     | -1.47061700 | 1.23861300  | 1.06720500  |
| C    | 4.01723900  | -0.06895000 | -0.62533300 | C     | -2.25966700 | 2.24685700  | 0.52230800  |
| C    | 1.54394800  | -0.02500300 | -0.17731700 | C     | -2.20918900 | 3.38888700  | 1.36664700  |
| C    | 3.15908700  | -1.54753500 | 0.95726500  | C     | -1.38893700 | 3.05523100  | 2.41730200  |
| C    | 2.85565600  | -0.51988600 | 0.03877900  | N     | -0.94705700 | 1.77079300  | 2.22841600  |
| C    | -0.17272200 | 1.52911100  | -2.89349300 | H     | -2.82233700 | 2.15039500  | -0.39785600 |
| C    | 0.26689900  | 3.14611000  | -1.05842500 | H     | -2.72195100 | 4.33152200  | 1.23660000  |
| C    | -2.50329400 | -2.10410100 | 0.00410900  | H     | -1.09880000 | 3.61312700  | 3.29670700  |
| C    | -2.66248000 | -1.09079600 | -1.17625100 | C     | -0.11000300 | 1.06254400  | 3.17914000  |
| C    | -3.81262100 | -2.72437000 | 0.47877400  | H     | -0.09316700 | 1.62406300  | 4.11509500  |
| C    | -1.51041900 | -3.22091500 | -0.34422900 | H     | -0.52331800 | 0.06972500  | 3.36721600  |
| C    | -2.59485100 | -1.71672100 | -2.56490700 | H     | 0.91219300  | 0.94736000  | 2.80792400  |
| C    | -3.94591400 | -0.26763100 | -1.04531400 |       |             |             |             |
| O    | -1.98552900 | -1.29558000 | 1.04553000  | N8_TS |             |             |             |
| O    | -1.53221300 | -0.24463300 | -1.00500000 | C     | 4.18902200  | -2.96200600 | -2.22138400 |
| B    | -1.15232800 | -0.24969800 | 0.45352600  | H     | 4.35934800  | -2.77525100 | -3.28642500 |
| N    | 0.24233800  | 1.71428200  | -1.47535300 | H     | 4.17126400  | -4.04791400 | -2.08981300 |
| H    | 5.09533300  | -1.65125900 | 1.92285100  | C     | 5.28383800  | -2.29021600 | -1.34598900 |
| H    | 4.85546800  | -2.86598000 | 0.67714200  | H     | 5.78994400  | -3.01952700 | -0.70563000 |
| H    | 5.96747700  | -0.16820500 | 0.30166000  | H     | 6.05822600  | -1.81222300 | -1.95338500 |
| H    | 5.70778800  | -1.37544500 | -0.94750900 | C     | 4.98972000  | -0.39579500 | 0.43434100  |
| H    | 4.77648900  | 1.30413000  | -2.10220500 | H     | 6.03890200  | -0.32075300 | 0.70268600  |
| H    | 2.54335700  | 2.26913900  | -2.53962700 | C     | 4.03667800  | 0.43675300  | 1.06120900  |
| H    | -0.00072400 | -2.09181700 | 1.99584700  | H     | 4.39667200  | 1.15752500  | 1.78815900  |
| H    | 2.30391500  | -2.90116900 | 2.38780600  | C     | 2.68611800  | 0.39319300  | 0.78213400  |
| H    | -1.16772500 | 1.96167300  | -3.00854200 | C     | 0.76613800  | -0.79601000 | -0.54766800 |
| H    | 0.54182600  | 2.02296800  | -3.55174800 | C     | 0.58282000  | -1.80926200 | -1.48211600 |
| H    | -0.21804800 | 0.45740400  | -3.07720100 | H     | -0.43798100 | -2.04920200 | -1.76347200 |
| H    | -0.71260200 | 3.58012300  | -1.25248600 | C     | 1.59604900  | -2.56899800 | -2.10864700 |
| H    | 1.04866000  | 3.66250600  | -1.61533500 | H     | 1.32675800  | -3.33244900 | -2.83359800 |
| H    | 0.45856000  | 3.18141400  | 0.01461000  | C     | 4.53759800  | -1.27279000 | -0.51028700 |
| H    | -3.60560200 | -3.44169000 | 1.27791800  | C     | 2.14609800  | -0.53285000 | -0.18333100 |
| H    | -4.31829200 | -3.25612100 | -0.33504400 | C     | 2.89508900  | -2.32667100 | -1.76371900 |

|   |             |             |             |      |             |             |             |
|---|-------------|-------------|-------------|------|-------------|-------------|-------------|
| C | 3.15270700  | -1.33080100 | -0.79725000 | H    | -5.54695400 | -3.72627100 | -2.12846200 |
| C | 2.12487800  | 1.56254800  | 2.88153200  | C    | -1.12140500 | -3.07478400 | 0.83559400  |
| H | 2.12672300  | 0.59518700  | 3.38373300  | H    | -1.24218400 | -4.13507100 | 0.59627400  |
| H | 1.33554700  | 2.18628900  | 3.30964900  | H    | -1.27682800 | -2.96823400 | 1.91421200  |
| H | 3.08418800  | 2.06230300  | 3.04941300  | H    | -0.09321500 | -2.80163200 | 0.62229300  |
| C | 2.04632900  | 2.68202600  | 0.76021500  | B    | -0.59905300 | -0.05411100 | 0.06331900  |
| H | 3.10407200  | 2.95956600  | 0.84995200  | N    | 1.83241500  | 1.38420700  | 1.44553900  |
| H | 1.43188300  | 3.45157400  | 1.22600300  | C    | -0.35900100 | -0.26956100 | 1.79272600  |
| H | 1.77819900  | 2.59456200  | -0.29248000 | C    | 0.52218400  | -1.13298000 | 2.49430500  |
| C | -0.62260000 | 1.55761400  | -0.43195000 | C    | -0.00964200 | -1.46937100 | 3.73931900  |
| C | -0.83782200 | 2.73404900  | 0.33549300  | C    | -1.25983600 | -0.86915900 | 3.78918100  |
| C | -0.83617900 | 4.00932900  | -0.25427900 | N    | -1.46596900 | -0.15878700 | 2.66731700  |
| H | -1.01729500 | 4.87303600  | 0.38505800  | H    | 1.49122000  | -1.43800500 | 2.12242500  |
| C | -0.58396600 | 4.21962400  | -1.59625400 | H    | 0.43520200  | -2.08674900 | 4.50513600  |
| C | -0.37495900 | 3.08017400  | -2.36608400 | H    | -2.03101300 | -0.92927900 | 4.54677500  |
| H | -0.20535900 | 3.19199800  | -3.43601400 | C    | -2.78524000 | 0.36504100  | 2.33428400  |
| C | -0.42287200 | 1.79486600  | -1.82956100 | H    | -3.16348600 | 0.95054800  | 3.17618100  |
| C | -1.07536600 | 2.84445300  | 1.83836400  | H    | -2.71577900 | 0.99313700  | 1.45152300  |
| H | -0.77072400 | 1.98934300  | 2.43073600  | H    | -3.46500700 | -0.46017700 | 2.10572900  |
| H | -2.13424600 | 3.03158400  | 2.04926800  | H    | 0.49941500  | 0.69101300  | 1.58012800  |
| H | -0.53687100 | 3.71515700  | 2.22793600  |      |             |             |             |
| C | -0.55474800 | 5.59664300  | -2.20503900 | N8_P |             |             |             |
| H | -1.32659800 | 5.70431400  | -2.97348400 | C    | -4.15379300 | 3.39290800  | -1.65565500 |
| H | 0.40897200  | 5.79528500  | -2.68437300 | H    | -4.36143200 | 3.41745600  | -2.73016800 |
| H | -0.72205800 | 6.36761000  | -1.44904700 | H    | -4.07856000 | 4.43228700  | -1.32361800 |
| C | -0.35006200 | 0.69678400  | -2.87245400 | C    | -5.25901300 | 2.61677600  | -0.88476200 |
| H | -0.65155600 | 1.10191800  | -3.84255200 | H    | -5.67977500 | 3.22099500  | -0.07482400 |
| H | -1.02114200 | -0.13068800 | -2.63595300 | H    | -6.09271600 | 2.33021300  | -1.53219700 |
| H | 0.65632100  | 0.28580000  | -2.97991000 | C    | -5.05260900 | 0.33271000  | 0.37130500  |
| C | -2.02203400 | -0.88814100 | -0.28381800 | H    | -6.10516500 | 0.23453900  | 0.61485000  |
| C | -3.18479400 | -0.31452900 | -0.88644700 | C    | -4.14332200 | -0.68793100 | 0.73082600  |
| C | -4.32744500 | -1.08634400 | -1.13990500 | H    | -4.53351600 | -1.58080100 | 1.20843900  |
| H | -5.18478000 | -0.60313300 | -1.60417800 | C    | -2.79939900 | -0.59161300 | 0.46212100  |
| C | -4.41992000 | -2.43205500 | -0.82330800 | C    | -0.78783000 | 0.81240800  | -0.46294500 |
| C | -3.31565200 | -2.99347900 | -0.20127600 | C    | -0.59626500 | 1.93538500  | -1.26861900 |
| H | -3.35149900 | -4.04223700 | 0.09006500  | H    | 0.42344400  | 2.18367400  | -1.54079400 |
| C | -2.15534000 | -2.26421500 | 0.07600600  | C    | -1.58455100 | 2.82791700  | -1.74006100 |
| C | -3.37448700 | 1.14126100  | -1.28362800 | H    | -1.29021800 | 3.67399000  | -2.35498100 |
| H | -2.78948200 | 1.41961400  | -2.16239400 | C    | -4.55544500 | 1.40146400  | -0.32100100 |
| H | -3.10180000 | 1.84899600  | -0.49956800 | C    | -2.18685600 | 0.53262900  | -0.19143500 |
| H | -4.42636700 | 1.30881200  | -1.52670600 | C    | -2.88417100 | 2.62224300  | -1.37086500 |
| C | -5.64577500 | -3.24359300 | -1.15017500 | C    | -3.16977600 | 1.47607200  | -0.60465000 |
| H | -6.53998300 | -2.61565200 | -1.18257200 | C    | -2.17938900 | -2.47201900 | 2.02053300  |
| H | -5.80720900 | -4.03261500 | -0.41070400 | H    | -1.97496300 | -1.74550100 | 2.80621900  |

|   |             |             |             |       |             |             |             |
|---|-------------|-------------|-------------|-------|-------------|-------------|-------------|
| H | -1.46449600 | -3.29422900 | 2.07017000  | H     | 1.20553000  | 2.64542400  | 2.28639000  |
| H | -3.19303400 | -2.86400100 | 2.08489800  | H     | -0.03445400 | 2.65309200  | 1.04905300  |
| C | -2.20038200 | -2.77182100 | -0.41896100 | B     | 0.63000400  | 0.06820000  | 0.16717600  |
| H | -3.22499100 | -3.13857500 | -0.34968500 | N     | -1.98881700 | -1.80268400 | 0.70225800  |
| H | -1.47349200 | -3.57937300 | -0.32530800 | C     | 0.50209700  | 0.14889300  | 1.80235500  |
| H | -2.04619800 | -2.24102800 | -1.35644700 | C     | -0.59682100 | 0.35596500  | 2.63190400  |
| C | 0.73536100  | -1.52773500 | -0.40852600 | C     | -0.17197400 | 0.37985900  | 3.98753800  |
| C | 0.97875600  | -2.70066100 | 0.36935900  | C     | 1.18828900  | 0.20140000  | 3.96551600  |
| C | 1.07180700  | -3.96711300 | -0.23594500 | N     | 1.58764800  | 0.07476900  | 2.66029200  |
| H | 1.28021600  | -4.83012900 | 0.39469500  | H     | -1.60280400 | 0.56341500  | 2.29566500  |
| C | 0.91896100  | -4.16347500 | -1.60024800 | H     | -0.78087100 | 0.53348800  | 4.86727900  |
| C | 0.65390400  | -3.03304700 | -2.36651200 | H     | 1.91286000  | 0.16031600  | 4.76663400  |
| H | 0.53072000  | -3.14321700 | -3.44310600 | C     | 2.99084000  | -0.06851800 | 2.31191500  |
| C | 0.56859500  | -1.75753200 | -1.80789600 | H     | 3.50410200  | -0.56365700 | 3.14074100  |
| C | 1.18236700  | -2.75043100 | 1.87954200  | H     | 3.09810400  | -0.67483000 | 1.41315000  |
| H | 0.50744600  | -2.11441800 | 2.45230800  | H     | 3.45542700  | 0.90330300  | 2.12010900  |
| H | 2.19701800  | -2.45053000 | 2.15415400  | H     | -0.99518500 | -1.51250500 | 0.65849300  |
| H | 1.05799400  | -3.78137100 | 2.22495300  |       |             |             |             |
| C | 1.05778800  | -5.52558200 | -2.22872700 | N9_TS |             |             |             |
| H | 0.30697700  | -5.68177200 | -3.00836100 | C     | 4.56253500  | -0.25748300 | -1.16732000 |
| H | 0.95075800  | -6.31915800 | -1.48499900 | C     | 3.50689100  | 0.62220000  | -1.47627600 |
| H | 2.04103700  | -5.64036400 | -2.69646700 | C     | 2.28153300  | 0.50350900  | -0.86417400 |
| C | 0.35438600  | -0.63843700 | -2.80545800 | C     | 0.70465200  | -0.77138600 | 0.68093000  |
| H | 0.64344100  | -0.97484300 | -3.80510400 | C     | 0.65701900  | -1.73082700 | 1.67557400  |
| H | 0.94896200  | 0.24149500  | -2.55439700 | C     | 1.76721600  | -2.50711200 | 2.07726300  |
| H | -0.69047900 | -0.31627100 | -2.84864600 | C     | 4.36699300  | -1.21699500 | -0.21206400 |
| C | 1.97072700  | 1.01892200  | -0.21456200 | C     | 1.99736700  | -0.53382000 | 0.07992200  |
| C | 3.12849600  | 0.61522800  | -0.94017400 | C     | 2.96687700  | -2.35062200 | 1.44312700  |
| C | 4.17224800  | 1.51301800  | -1.20088600 | C     | 3.11169000  | -1.36675800 | 0.43160700  |
| H | 5.03164200  | 1.15963000  | -1.76879900 | C     | 0.76909400  | 1.48390300  | -2.51849800 |
| C | 4.16452700  | 2.82683700  | -0.75765800 | C     | 1.73813900  | 2.87394500  | -0.78013100 |
| C | 3.07506200  | 3.21466900  | 0.00884200  | C     | -2.54994700 | -1.66545700 | 0.06581400  |
| H | 3.04810300  | 4.22648400  | 0.41027100  | C     | -2.32093100 | -1.00789200 | -1.33464100 |
| C | 2.01506100  | 2.35053000  | 0.30217600  | C     | -4.00880500 | -1.75146500 | 0.49728700  |
| C | 3.41828400  | -0.79217800 | -1.43653400 | C     | -1.91830800 | -3.05987600 | 0.14831500  |
| H | 2.86445000  | -1.05129400 | -2.34196800 | C     | -2.26605300 | -1.99094400 | -2.49891600 |
| H | 3.18815300  | -1.56304500 | -0.69859500 | C     | -3.36800800 | 0.06664300  | -1.63749900 |
| H | 4.48144700  | -0.87296500 | -1.67689400 | O     | -1.86622900 | -0.77697100 | 0.94581200  |
| C | 5.30541300  | 3.76472500  | -1.05662300 | O     | -1.03524800 | -0.40649400 | -1.19607600 |
| H | 6.20027600  | 3.49534500  | -0.48556800 | B     | -0.76922300 | -0.18621200 | 0.21382600  |
| H | 5.04613800  | 4.79535200  | -0.80188800 | N     | 1.28219800  | 1.52279200  | -1.14054200 |
| H | 5.57591400  | 3.73454900  | -2.11632100 | H     | 5.52145700  | -0.14944100 | -1.66285300 |
| C | 0.99087700  | 2.94811000  | 1.25396400  | H     | 3.66941400  | 1.42133100  | -2.19427700 |
| H | 1.04684100  | 4.03979700  | 1.21177500  | H     | -0.30443400 | -1.91451300 | 2.14546500  |



|      |             |             |             |   |             |             |             |
|------|-------------|-------------|-------------|---|-------------|-------------|-------------|
| H    | 1.65158100  | -3.24688400 | 2.86390200  | C | 2.91117500  | -2.26660100 | 1.57483200  |
| H    | -0.09471600 | 2.15295700  | -2.58064100 | C | 3.01780800  | -1.37332500 | 0.48074300  |
| H    | 1.53544400  | 1.81977600  | -3.22881000 | C | 0.71976300  | 1.11551000  | -2.86772000 |
| H    | 0.44402200  | 0.47016700  | -2.74105800 | C | 1.51290500  | 2.68359900  | -1.11202000 |
| H    | 0.87051000  | 3.54165200  | -0.79929100 | C | -2.53888000 | -1.67075800 | 0.04466200  |
| H    | 2.50156400  | 3.24817600  | -1.47080800 | C | -2.36919200 | -0.83431400 | -1.26576100 |
| H    | 2.14697800  | 2.85232500  | 0.23225500  | C | -3.98803200 | -1.93354000 | 0.43776200  |
| H    | -4.07022500 | -2.24379300 | 1.47182900  | C | -1.78349700 | -3.00287400 | -0.03764400 |
| H    | -4.59541900 | -2.33742700 | -0.21864100 | C | -2.31379300 | -1.66053400 | -2.54574900 |
| H    | -4.45044700 | -0.75859000 | 0.59197400  | C | -3.44992500 | 0.24151300  | -1.39285700 |
| H    | -1.93937200 | -3.39786100 | 1.18849900  | O | -1.95300900 | -0.83334400 | 1.02722700  |
| H    | -2.47187500 | -3.78398300 | -0.45775400 | O | -1.10181900 | -0.21680200 | -1.07199800 |
| H    | -0.87743100 | -3.04191300 | -0.18432900 | B | -0.87198300 | -0.07161400 | 0.40393800  |
| H    | -2.13340200 | -1.44019600 | -3.43520400 | N | 1.11667000  | 1.28295600  | -1.44127700 |
| H    | -3.19621200 | -2.56487100 | -2.57249200 | H | 5.36296700  | -0.37771600 | -1.80092200 |
| H    | -1.42945500 | -2.68284200 | -2.39052000 | H | 3.47781500  | 1.08325200  | -2.47450800 |
| H    | -3.02870400 | 0.65761600  | -2.49488500 | H | -0.34384800 | -1.78843600 | 2.32866400  |
| H    | -4.33419300 | -0.38093100 | -1.89119200 | H | 1.63410600  | -3.06982100 | 3.08283300  |
| H    | -3.50647300 | 0.73196000  | -0.78304100 | H | -0.13711800 | 1.76590100  | -3.04882000 |
| H    | 0.17655700  | 1.45341900  | -0.24556300 | H | 1.55432500  | 1.38932800  | -3.51277400 |
| C    | -0.83943100 | 1.58584900  | 0.49574900  | H | 0.42331900  | 0.07737700  | -3.00054800 |
| C    | -1.73665400 | 2.49097500  | -0.10386000 | H | 0.70394500  | 3.34813600  | -1.41050900 |
| C    | -2.07813500 | 3.48927900  | 0.81423100  | H | 2.44138900  | 2.92021400  | -1.63079800 |
| C    | -1.38568500 | 3.19151400  | 1.98129800  | H | 1.63940100  | 2.74882300  | -0.03057400 |
| N    | -0.63873500 | 2.08830700  | 1.78586800  | H | -4.01332500 | -2.54200700 | 1.34623500  |
| H    | -2.08037500 | 2.40998100  | -1.12581600 | H | -4.52093800 | -2.47518500 | -0.35165700 |
| H    | -2.74220400 | 4.32831700  | 0.66886100  | H | -4.50980400 | -0.99714000 | 0.64294700  |
| H    | -1.38498800 | 3.69528000  | 2.93884700  | H | -1.74265500 | -3.44707600 | 0.96117300  |
| C    | 0.14789900  | 1.44757200  | 2.82621200  | H | -2.28517300 | -3.70784100 | -0.70875100 |
| H    | 0.16128700  | 2.09907200  | 3.70121800  | H | -0.75781700 | -2.85308000 | -0.38472600 |
| H    | -0.29342500 | 0.48371300  | 3.08757800  | H | -2.21580000 | -0.99438800 | -3.40975700 |
| H    | 1.17053200  | 1.27713300  | 2.48299900  | H | -3.22918900 | -2.24749600 | -2.67687100 |
| H    | 5.17501800  | -1.88426400 | 0.07532800  | H | -1.45866800 | -2.33952400 | -2.53528800 |
| H    | 3.82698100  | -2.96276900 | 1.70041700  | H | -3.18033700 | 0.91866100  | -2.21059500 |
|      |             |             |             | H | -4.42792000 | -0.19387800 | -1.62088200 |
| N9_P |             |             |             | H | -3.51985200 | 0.82222100  | -0.46971400 |
| C    | 4.41936700  | -0.43829500 | -1.27056100 | H | 0.24155200  | 1.11251900  | -0.91841000 |
| C    | 3.34257500  | 0.38150200  | -1.65706300 | C | -0.94880400 | 1.52266700  | 0.78514800  |
| C    | 2.14009600  | 0.31117900  | -0.99953500 | C | -1.40745800 | 2.57880900  | 0.00382100  |
| C    | 0.61937300  | -0.74105800 | 0.76909400  | C | -1.25088300 | 3.79425300  | 0.72351400  |
| C    | 0.60586700  | -1.63717000 | 1.82333500  | C | -0.70278200 | 3.45561100  | 1.93726800  |
| C    | 1.72567800  | -2.38561400 | 2.24430700  | N | -0.51900900 | 2.09701500  | 1.96344300  |
| C    | 4.25301500  | -1.28598600 | -0.21064000 | H | -1.83125100 | 2.46284700  | -0.98627400 |
| C    | 1.88201000  | -0.58148300 | 0.08947800  | H | -1.52606000 | 4.79054400  | 0.40742500  |

|        |             |             |             |   |             |             |             |
|--------|-------------|-------------|-------------|---|-------------|-------------|-------------|
| H      | -0.44664300 | 4.06173400  | 2.79500800  | H | 2.29834900  | 5.69362400  | -1.67400400 |
| C      | -0.03337000 | 1.36849700  | 3.12076900  | H | 1.59850900  | 6.24731700  | -0.14526200 |
| H      | -0.06904100 | 2.02699400  | 3.99055100  | H | 0.61992200  | 6.22731900  | -1.61856100 |
| H      | -0.67457400 | 0.50356700  | 3.30223800  | C | -0.16693200 | 1.30576200  | -2.75056200 |
| H      | 0.99227200  | 1.01694000  | 2.97642300  | H | -0.39185900 | 2.01573300  | -3.55125800 |
| H      | 3.78355700  | -2.84895900 | 1.85738800  | H | -1.06215800 | 0.70595000  | -2.57932400 |
| H      | 5.07218300  | -1.91659700 | 0.12371000  | H | 0.61756100  | 0.63568200  | -3.10929400 |
| N10_TS |             |             |             | C | -2.02135700 | -0.28386400 | -0.28901700 |
| C      | 4.71234300  | -2.33221800 | -0.56689000 | C | -2.97133300 | 0.75711200  | -0.53698300 |
| H      | 5.72789000  | -2.68972900 | -0.43609400 | C | -4.33437000 | 0.47209500  | -0.69973100 |
| C      | 4.16808100  | -1.40298400 | 0.33870500  | H | -5.01672300 | 1.29874900  | -0.88708100 |
| H      | 4.79820200  | -1.03997600 | 1.14280600  | C | -4.85682500 | -0.80934100 | -0.62826200 |
| C      | 2.88423000  | -0.92310300 | 0.21568500  | C | -3.95340400 | -1.82564700 | -0.36258700 |
| C      | 0.59531200  | -1.01685100 | -1.00159100 | H | -4.31926600 | -2.84804700 | -0.27939000 |
| C      | -0.04333600 | -1.60937400 | -2.08011100 | C | -2.58554500 | -1.59244200 | -0.18931800 |
| H      | -1.09832300 | -1.40227500 | -2.22317200 | C | -2.68417200 | 2.24868200  | -0.62116400 |
| C      | 0.55917000  | -2.47360500 | -3.01200100 | H | -2.14628200 | 2.52304000  | -1.53077600 |
| H      | -0.02815200 | -2.87338000 | -3.83302500 | H | -2.09141300 | 2.63254600  | 0.20991800  |
| C      | 3.93952500  | -2.74758000 | -1.60983800 | H | -3.63173000 | 2.79217400  | -0.62915800 |
| C      | 1.99969700  | -1.36264200 | -0.83816100 | C | -6.32147200 | -1.08406000 | -0.84635600 |
| C      | 1.86996700  | -2.81360800 | -2.85379900 | H | -6.52806800 | -1.29696000 | -1.90074000 |
| C      | 2.60408100  | -2.29153900 | -1.76277500 | H | -6.93287300 | -0.22446000 | -0.55950900 |
| C      | 2.94173500  | -0.10640200 | 2.54438100  | H | -6.65249800 | -1.94995900 | -0.26668800 |
| H      | 2.66566200  | -1.11197900 | 2.86192600  | C | -1.82363300 | -2.86006400 | 0.15557500  |
| H      | 2.44221300  | 0.62208500  | 3.18751000  | H | -2.29936200 | -3.71323900 | -0.33670500 |
| H      | 4.02215900  | 0.02892100  | 2.65519600  | H | -1.86763800 | -3.04352500 | 1.23423800  |
| C      | 3.08809300  | 1.39679600  | 0.67837400  | H | -0.77973300 | -2.85210300 | -0.13554600 |
| H      | 4.17757600  | 1.27612800  | 0.63374000  | B | -0.36977500 | -0.04898300 | -0.02990900 |
| H      | 2.84320400  | 2.20443100  | 1.36684500  | N | 2.48655000  | 0.12810000  | 1.15868500  |
| H      | 2.70317800  | 1.63982900  | -0.31182000 | C | -0.08984200 | -0.75157100 | 1.56352800  |
| C      | 0.11162300  | 1.55934600  | -0.17478700 | C | 0.47791000  | -1.99881300 | 1.92806200  |
| C      | 0.39323300  | 2.50891200  | 0.84406200  | C | -0.04957800 | -2.43972800 | 3.14228800  |
| C      | 0.77800800  | 3.82579400  | 0.53886600  | C | -0.99775400 | -1.49468700 | 3.50621100  |
| H      | 0.97165300  | 4.51024100  | 1.36449300  | N | -1.01701400 | -0.50066900 | 2.60181600  |
| C      | 0.95297900  | 4.28076500  | -0.75343400 | H | 1.24862300  | -2.50180900 | 1.35937500  |
| C      | 0.67745300  | 3.36754600  | -1.76610700 | H | 0.20139300  | -3.33757500 | 3.68660200  |
| H      | 0.76842200  | 3.68857900  | -2.80265500 | H | -1.68116300 | -1.48150600 | 4.34565400  |
| C      | 0.24224500  | 2.06970900  | -1.50677400 | C | -2.07945300 | 0.49783800  | 2.59975200  |
| C      | 0.36307400  | 2.30782800  | 2.35600900  | H | -2.15889900 | 0.93989500  | 3.59616200  |
| H      | 0.35832400  | 1.28106200  | 2.70192400  | H | -1.85247300 | 1.27190200  | 1.87301600  |
| H      | -0.51157600 | 2.80509300  | 2.79057900  | H | -3.02548300 | 0.03227600  | 2.31117800  |
| H      | 1.23614000  | 2.79552700  | 2.80378800  | H | 1.01641600  | -0.09582400 | 1.38675700  |
| C      | 1.39194300  | 5.68792800  | -1.06086800 | H | 2.36827100  | -3.49629600 | -3.53628500 |
|        |             |             |             | H | 4.32393200  | -3.45250900 | -2.34159900 |

|       |             |             |             |        |             |             |             |
|-------|-------------|-------------|-------------|--------|-------------|-------------|-------------|
| N10_P |             |             |             | C      | -2.06131600 | -0.18426800 | -0.19564600 |
| C     | 4.36247100  | -3.00918000 | -0.30925700 | C      | -2.94610500 | 0.82104200  | -0.67256800 |
| H     | 5.32152100  | -3.48107800 | -0.12966200 | C      | -4.30321700 | 0.54550100  | -0.90379300 |
| C     | 4.09952800  | -1.72453900 | 0.20765700  | H      | -4.93845700 | 1.34719900  | -1.27627300 |
| H     | 4.88382800  | -1.19988300 | 0.74119000  | C      | -4.87066400 | -0.69404800 | -0.66383000 |
| C     | 2.87818200  | -1.13801400 | 0.01033700  | C      | -4.03453700 | -1.66437900 | -0.12323300 |
| C     | 0.43693600  | -1.20753200 | -0.82958900 | H      | -4.45323100 | -2.63730000 | 0.12953400  |
| C     | -0.33564300 | -1.88845800 | -1.76368700 | C      | -2.68102400 | -1.43406800 | 0.12870000  |
| H     | -1.34053300 | -1.53089300 | -1.95330100 | C      | -2.59290400 | 2.28222300  | -0.90330100 |
| C     | 0.03710700  | -3.06298200 | -2.44458400 | H      | -2.07686600 | 2.45429900  | -1.85126800 |
| H     | -0.66238000 | -3.51954600 | -3.13810000 | H      | -1.95735700 | 2.69973300  | -0.12097200 |
| C     | 3.40489500  | -3.60789300 | -1.07500100 | H      | -3.51395300 | 2.86992800  | -0.92967700 |
| C     | 1.78485200  | -1.74208600 | -0.69743000 | C      | -6.31958800 | -0.97956000 | -0.96046800 |
| C     | 1.24110400  | -3.64853100 | -2.17877600 | H      | -6.77372900 | -1.58621700 | -0.17182800 |
| C     | 2.14336600  | -2.99658700 | -1.30935200 | H      | -6.42784100 | -1.53294700 | -1.89953700 |
| C     | 3.34774600  | 0.65107600  | 1.72129900  | H      | -6.89432200 | -0.05463400 | -1.05381500 |
| H     | 2.91920400  | 0.00651200  | 2.48812700  | C      | -1.98686600 | -2.59015000 | 0.83141200  |
| H     | 3.08181200  | 1.69227900  | 1.90530000  | H      | -2.54369000 | -3.51403400 | 0.65089400  |
| H     | 4.43105300  | 0.55620400  | 1.66988500  | H      | -1.96692600 | -2.42081200 | 1.91486100  |
| C     | 3.29744200  | 1.14781600  | -0.68191500 | H      | -0.95748500 | -2.74970600 | 0.52230700  |
| H     | 4.37494500  | 0.98505300  | -0.72557400 | B      | -0.41272900 | -0.02182600 | 0.11156200  |
| H     | 3.05145200  | 2.18570800  | -0.45309200 | N      | 2.75273400  | 0.27701800  | 0.40742600  |
| H     | 2.82853200  | 0.85005400  | -1.61790400 | C      | -0.23290900 | -0.45565200 | 1.68599400  |
| C     | 0.19727200  | 1.53334400  | -0.21461500 | C      | 0.69777900  | -1.26826400 | 2.32893900  |
| C     | 0.60749500  | 2.50403800  | 0.75056900  | C      | 0.39400700  | -1.33684700 | 3.71475200  |
| C     | 1.10134500  | 3.75943800  | 0.35132400  | C      | -0.73148900 | -0.57482200 | 3.89790000  |
| H     | 1.39020000  | 4.47230200  | 1.12185800  | N      | -1.10905100 | -0.05959800 | 2.68488400  |
| C     | 1.21880700  | 4.13683300  | -0.97826500 | H      | 1.47544200  | -1.83931000 | 1.84378400  |
| C     | 0.83397600  | 3.19670800  | -1.92869200 | H      | 0.91906700  | -1.89415500 | 4.47741500  |
| H     | 0.90592900  | 3.45414200  | -2.98434400 | H      | -1.30616700 | -0.35801200 | 4.78721800  |
| C     | 0.34260400  | 1.93959600  | -1.57626800 | C      | -2.30378200 | 0.75856500  | 2.55962100  |
| C     | 0.54400700  | 2.34968100  | 2.26613300  | H      | -2.48634300 | 1.24779300  | 3.52002800  |
| H     | 0.87339500  | 1.38197200  | 2.64310900  | H      | -2.16686000 | 1.52154400  | 1.79417900  |
| H     | -0.47418700 | 2.49746800  | 2.63469800  | H      | -3.17420500 | 0.15641700  | 2.28360500  |
| H     | 1.15884900  | 3.12607800  | 2.73142300  | H      | 1.73999700  | 0.49023700  | 0.47108100  |
| C     | 1.71034700  | 5.50360300  | -1.37758900 | H      | 1.53404500  | -4.59164500 | -2.63044600 |
| H     | 2.39190800  | 5.44764700  | -2.23097500 | H      | 3.59150700  | -4.57414800 | -1.53493100 |
| H     | 2.23203400  | 5.99504700  | -0.55280900 | N11_TS |             |             |             |
| H     | 0.87438100  | 6.14657800  | -1.67131000 | B      | 0.10648100  | -0.01476700 | 0.24700300  |
| C     | -0.07399300 | 1.06958700  | -2.74287500 | N      | -2.41089400 | -1.95205600 | 0.45337900  |
| H     | -0.22697200 | 1.68956700  | -3.63045300 | C      | -1.41217400 | -1.87993500 | 1.54825100  |
| H     | -1.00226300 | 0.53605800  | -2.53386400 | H      | -0.66590200 | -2.65014800 | 1.32588200  |
| H     | 0.67915900  | 0.31452800  | -2.98774800 | C      | -0.75259900 | -0.49060500 | 1.57113200  |

|   |             |             |             |       |             |             |             |
|---|-------------|-------------|-------------|-------|-------------|-------------|-------------|
| H | -1.61643200 | 0.18580400  | 1.59713800  | C     | 3.64858300  | -1.78307000 | 0.69660400  |
| C | -0.11946300 | -0.37979400 | 2.98208600  | F     | 1.59740700  | -2.21353500 | 1.68176200  |
| H | 0.97220300  | -0.37074400 | 2.95550200  | C     | 2.31759700  | -1.41593900 | 0.86083800  |
| H | -0.42969500 | 0.55389400  | 3.46070900  | C     | -0.46102800 | -0.92114200 | -1.13371300 |
| C | -0.64147000 | -1.60751200 | 3.77240100  | C     | 0.12853600  | -2.21185600 | -1.33537800 |
| H | 0.11938000  | -2.39473300 | 3.76351100  | C     | 0.34372700  | -2.45217200 | -2.67872100 |
| H | -0.86809500 | -1.38133700 | 4.81692300  | C     | -0.08441400 | -1.29691600 | -3.33948400 |
| C | -1.87350100 | -2.09351900 | 2.99384400  | N     | -0.54643800 | -0.40848400 | -2.45659200 |
| H | -2.73347200 | -1.44824300 | 3.21111100  | H     | 0.38695200  | -2.88015000 | -0.52305800 |
| H | -2.15275400 | -3.12655400 | 3.22420500  | H     | 0.76148500  | -3.33222000 | -3.14362800 |
| C | -2.63236100 | -3.31747300 | -0.04904500 | H     | -0.08109800 | -1.06920300 | -4.39758700 |
| H | -3.17877200 | -3.90533100 | 0.70583900  | C     | -0.96731400 | 0.92494900  | -2.86382400 |
| H | -1.65759800 | -3.79077800 | -0.19230100 | H     | -0.97277900 | 0.96119800  | -3.95345000 |
| C | -3.40033000 | -3.28300200 | -1.36604200 | H     | -1.96615000 | 1.14026200  | -2.49001500 |
| H | -3.55220500 | -4.30614200 | -1.72332600 | H     | -0.26100600 | 1.66298500  | -2.48141200 |
| H | -2.78020000 | -2.76630600 | -2.11186100 | H     | -1.56812300 | -1.26082900 | -0.56960300 |
| C | -4.73251600 | -2.55477900 | -1.19869100 |       |             |             |             |
| H | -5.24960800 | -2.46931200 | -2.15903600 | N11_P |             |             |             |
| H | -5.38278300 | -3.13972100 | -0.53461100 | B     | 0.43240800  | -0.34403900 | 0.02906200  |
| C | -4.49645800 | -1.17476700 | -0.58653700 | N     | -2.37554700 | -1.65668400 | 0.64276200  |
| H | -3.93379400 | -0.54743700 | -1.28817900 | C     | -1.19741000 | -1.99036000 | 1.53872700  |
| H | -5.44442900 | -0.66754200 | -0.38372200 | H     | -0.80711600 | -2.92194700 | 1.12586700  |
| C | -3.70000800 | -1.28636200 | 0.71038000  | C     | -0.08863300 | -0.93815500 | 1.51953500  |
| H | -3.51034900 | -0.29799800 | 1.12982600  | H     | -0.50803900 | -0.07426900 | 2.05785300  |
| H | -4.27192700 | -1.86837600 | 1.45103300  | C     | 0.84992100  | -1.57677900 | 2.56045900  |
| C | -0.20214200 | 1.60311600  | 0.16858300  | H     | 1.42846900  | -2.38470100 | 2.11306300  |
| F | 1.94737300  | 2.34743300  | 0.87619600  | H     | 1.55673300  | -0.84290800 | 2.95441500  |
| C | 0.68077000  | 2.61687300  | 0.53718300  | C     | -0.09070200 | -2.14767900 | 3.65829800  |
| F | 1.23119800  | 4.87707200  | 0.95797900  | H     | 0.23930800  | -3.13484900 | 3.98985600  |
| C | 0.32879400  | 3.96255100  | 0.60600700  | H     | -0.11237100 | -1.50552600 | 4.54149000  |
| F | -1.32284700 | 5.63462900  | 0.39333800  | C     | -1.50644200 | -2.21675900 | 3.01961800  |
| C | -0.97001900 | 4.35340800  | 0.32533100  | H     | -2.12391100 | -1.40495600 | 3.41391600  |
| F | -3.16357300 | 3.72663900  | -0.27964300 | H     | -2.02069700 | -3.16108100 | 3.22162700  |
| C | -1.90098300 | 3.38329300  | -0.01655800 | C     | -3.15680100 | -2.87877200 | 0.26227700  |
| F | -2.47072000 | 1.16396800  | -0.37245100 | H     | -3.57994700 | -3.28208200 | 1.18825000  |
| C | -1.49826500 | 2.05851400  | -0.06214600 | H     | -2.43691900 | -3.58745700 | -0.14998400 |
| C | 1.71183900  | -0.35881200 | 0.19371300  | C     | -4.23398200 | -2.52898100 | -0.75430300 |
| F | 2.04769300  | 1.25277400  | -1.51343200 | H     | -4.76953000 | -3.44552400 | -1.01667600 |
| C | 2.54109100  | 0.27400200  | -0.73018900 | H     | -3.74379800 | -2.16805800 | -1.66809200 |
| F | 4.61244000  | 0.61372500  | -1.82345700 | C     | -5.18338100 | -1.46587500 | -0.20490800 |
| C | 3.87472000  | -0.04740600 | -0.93047400 | H     | -5.93597500 | -1.20261000 | -0.95225600 |
| F | 5.71594900  | -1.41939900 | -0.37981400 | H     | -5.71772700 | -1.86784800 | 0.66592200  |
| C | 4.43901600  | -1.08567800 | -0.20206200 | C     | -4.38548700 | -0.22718600 | 0.20018600  |
| F | 4.15933700  | -2.81099700 | 1.37692700  | H     | -3.96510400 | 0.24421000  | -0.69131900 |

|        |             |             |             |   |             |             |             |
|--------|-------------|-------------|-------------|---|-------------|-------------|-------------|
| H      | -5.02624300 | 0.51691000  | 0.68249400  | C | 2.24081400  | -0.42109800 | 1.44164800  |
| C      | -3.27880800 | -0.58813100 | 1.18537200  | H | 2.48900800  | 0.62452000  | 1.20970000  |
| H      | -2.65159700 | 0.26891600  | 1.44056900  | C | 0.70254700  | -0.52483300 | 1.54044900  |
| H      | -3.71475600 | -0.99514000 | 2.10162000  | H | 0.48056000  | -1.55879800 | 1.83914400  |
| C      | -0.47882100 | 1.05490900  | -0.08348100 | C | 4.07371300  | -0.71778900 | -0.20637800 |
| F      | 0.69623300  | 1.96325000  | 1.75539300  | H | 4.86357900  | -0.96967000 | 0.52098000  |
| C      | -0.28523000 | 2.08005400  | 0.84895600  | H | 4.02673800  | 0.36715000  | -0.29126800 |
| F      | -0.81400300 | 4.15624400  | 1.85440100  | C | 4.39476600  | -1.35688600 | -1.55428300 |
| C      | -1.06593700 | 3.22211300  | 0.93881300  | H | 3.61973500  | -1.06141000 | -2.27318800 |
| F      | -2.91775100 | 4.46044800  | 0.14872800  | H | 5.34947500  | -0.96934700 | -1.92233600 |
| C      | -2.14197000 | 3.38182600  | 0.07209600  | C | 4.43677400  | -2.88006900 | -1.42669000 |
| F      | -3.46270200 | 2.47964500  | -1.66231500 | H | 5.28108600  | -3.16453000 | -0.78456500 |
| C      | -2.40120600 | 2.38903700  | -0.85423300 | H | 4.60194900  | -3.34852300 | -2.40125100 |
| F      | -1.99989700 | 0.31436300  | -1.77782100 | C | 3.13493500  | -3.38556000 | -0.80244500 |
| C      | -1.58204500 | 1.26300200  | -0.90093000 | H | 2.31008800  | -3.21340100 | -1.50565100 |
| C      | 2.06488600  | -0.05885300 | 0.02927200  | H | 3.18561400  | -4.46262100 | -0.61072100 |
| F      | 2.03952700  | 2.28247100  | -0.43531700 | C | 2.84863300  | -2.65735100 | 0.51097200  |
| C      | 2.72411300  | 1.15128700  | -0.17356600 | H | 1.90695300  | -2.99079900 | 0.95471500  |
| F      | 4.65728400  | 2.49784100  | -0.39235100 | H | 3.64821700  | -2.88471800 | 1.23274200  |
| C      | 4.10734600  | 1.29850400  | -0.19263100 | C | 2.92780300  | -0.78621100 | 2.76549100  |
| F      | 6.24219800  | 0.30311900  | -0.03737100 | H | 2.70131100  | -1.83219900 | 3.01133200  |
| C      | 4.91533900  | 0.18803100  | -0.02163600 | H | 4.01745900  | -0.70610400 | 2.66474000  |
| F      | 5.07594700  | -2.14232300 | 0.27316400  | C | 2.42935100  | 0.09390400  | 3.91209400  |
| C      | 4.31757200  | -1.05265300 | 0.14072000  | H | 2.92533900  | -0.19340100 | 4.84491900  |
| F      | 2.44776500  | -2.39841800 | 0.24634400  | H | 2.70313600  | 1.13924700  | 3.71484500  |
| C      | 2.93299700  | -1.14801600 | 0.14531800  | C | 0.91062700  | -0.01170300 | 4.04100800  |
| C      | 0.17285400  | -1.31538100 | -1.26145500 | H | 0.55096200  | 0.63886400  | 4.84523800  |
| C      | -0.13436400 | -2.66889200 | -1.38796800 | H | 0.63736000  | -1.03994200 | 4.31517300  |
| C      | -0.19014800 | -3.01625400 | -2.76512100 | C | 0.24092900  | 0.35761800  | 2.71844300  |
| C      | 0.09982500  | -1.87143400 | -3.45934700 | H | 0.48333400  | 1.40588200  | 2.49378700  |
| N      | 0.33063000  | -0.86444100 | -2.56073000 | H | -0.84774400 | 0.30611700  | 2.81101500  |
| H      | -0.16829300 | -3.38456000 | -0.57959100 | C | 0.12712300  | 1.49208300  | -0.10848300 |
| H      | -0.37918800 | -3.99148000 | -3.18982900 | C | -0.77138900 | 2.45237200  | 0.36251200  |
| H      | 0.17409400  | -1.68380100 | -4.52121400 | F | -1.87953400 | 2.08883700  | 1.02475600  |
| C      | 0.63474600  | 0.48592100  | -2.99700100 | C | -0.59513600 | 3.82247100  | 0.21507500  |
| H      | 1.35078600  | 0.44180800  | -3.82088600 | F | -1.50346000 | 4.67546900  | 0.68670200  |
| H      | -0.26886500 | 1.00096400  | -3.33881100 | C | 0.53950500  | 4.30720300  | -0.41836000 |
| H      | 1.07706200  | 1.06014700  | -2.18558700 | F | 0.72605400  | 5.61617600  | -0.56585600 |
| H      | -1.93479600 | -1.32297000 | -0.23631000 | C | 1.47928800  | 3.40272000  | -0.88294300 |
|        |             |             |             | F | 2.59098500  | 3.83366500  | -1.48158600 |
| N12_TS |             |             |             | C | 1.25120000  | 2.04317600  | -0.70956000 |
| N      | 2.77289500  | -1.20410400 | 0.28704300  | F | 2.23380800  | 1.23670900  | -1.17899700 |
| H      | 1.62190300  | -1.07532200 | -0.67158800 | C | -1.71242400 | -0.47036600 | 0.15400300  |
| B      | -0.10233600 | -0.12138700 | 0.15622300  | C | -2.51329500 | -0.00994400 | -0.89443400 |

|        |             |             |             |   |             |             |             |
|--------|-------------|-------------|-------------|---|-------------|-------------|-------------|
| F      | -1.98531300 | 0.77657300  | -1.84542500 | H | 3.44122200  | -2.88271900 | 1.28606900  |
| C      | -3.86250000 | -0.29994300 | -1.03225900 | C | 2.69371700  | -0.86490700 | 2.88870300  |
| F      | -4.56246400 | 0.17658100  | -2.06173600 | H | 2.44902600  | -1.92354100 | 3.04210500  |
| C      | -4.48849700 | -1.09605900 | -0.08313300 | H | 3.78651500  | -0.77170400 | 2.90497000  |
| F      | -5.78117300 | -1.39236100 | -0.19744500 | C | 2.08258500  | -0.05613400 | 4.03699700  |
| C      | -3.74490200 | -1.58282900 | 0.97755700  | H | 2.48346400  | -0.41665700 | 4.98926200  |
| F      | -4.32342900 | -2.35853300 | 1.89607500  | H | 2.38850900  | 0.99396200  | 3.93946900  |
| C      | -2.39344200 | -1.26238700 | 1.07274400  | C | 0.55689600  | -0.14124700 | 4.00934900  |
| F      | -1.75863200 | -1.81117000 | 2.13117000  | H | 0.13280300  | 0.48063100  | 4.80442300  |
| C      | 0.48214100  | -1.03073300 | -1.21051600 | H | 0.24081300  | -1.17420700 | 4.20781100  |
| C      | 0.54213600  | -0.51141000 | -2.53586600 | C | 0.02713900  | 0.29448800  | 2.64472200  |
| C      | 0.07167300  | -1.44514000 | -3.44541200 | H | 0.30617300  | 1.34500900  | 2.47877300  |
| C      | -0.30325200 | -2.55918500 | -2.69307600 | H | -1.06453300 | 0.26251800  | 2.62822000  |
| N      | -0.06389100 | -2.33378200 | -1.39927900 | C | 0.07065100  | 1.48771000  | -0.14967100 |
| H      | 0.90652600  | 0.47448300  | -2.78167300 | C | -0.88121800 | 2.44955200  | 0.20222800  |
| H      | -0.01030600 | -1.34734000 | -4.51732700 | F | -2.06593300 | 2.09629800  | 0.71993500  |
| H      | -0.72523800 | -3.50225000 | -3.01849300 | C | -0.69211700 | 3.82201500  | 0.08740300  |
| C      | -0.37938900 | -3.31779900 | -0.37496300 | F | -1.66001200 | 4.66667900  | 0.44044700  |
| H      | -1.36944100 | -3.73662100 | -0.56941900 | C | 0.51594400  | 4.31856500  | -0.37751800 |
| H      | 0.35997200  | -4.12496200 | -0.37781800 | F | 0.71723900  | 5.62934800  | -0.48786300 |
| H      | -0.39887700 | -2.84519800 | 0.60342900  | C | 1.51434400  | 3.41849300  | -0.70457200 |
|        |             |             |             | F | 2.70587600  | 3.85256200  | -1.12306700 |
| NB12_P |             |             |             | C | 1.26651800  | 2.05798900  | -0.57229800 |
| N      | 2.80825700  | -1.09628700 | 0.38751900  | F | 2.33928700  | 1.27433300  | -0.87368000 |
| H      | 2.23388800  | -0.85089400 | -0.44653100 | C | -1.78641300 | -0.49703600 | 0.08165000  |
| B      | -0.16017200 | -0.15401500 | 0.04422200  | C | -2.58324700 | -0.04012600 | -0.97153600 |
| C      | 2.11485500  | -0.40011100 | 1.55037700  | F | -2.04901900 | 0.75294000  | -1.91076300 |
| H      | 2.36574600  | 0.65773800  | 1.40201000  | C | -3.92938300 | -0.33512300 | -1.12018800 |
| C      | 0.58688900  | -0.55679000 | 1.48392900  | F | -4.62632000 | 0.14371200  | -2.15113700 |
| H      | 0.37237800  | -1.60220400 | 1.74337700  | C | -4.55927400 | -1.13714700 | -0.17756000 |
| C      | 4.20005500  | -0.60334700 | 0.13420800  | F | -5.85105900 | -1.43703900 | -0.30059400 |
| H      | 4.82560000  | -0.95767600 | 0.95933900  | C | -3.82065800 | -1.62336100 | 0.88571200  |
| H      | 4.16489800  | 0.48524000  | 0.15128700  | F | -4.39929000 | -2.40966300 | 1.79692700  |
| C      | 4.69616500  | -1.13831700 | -1.20256600 | C | -2.47077400 | -1.29667500 | 0.98928600  |
| H      | 4.04121900  | -0.75783600 | -1.99743200 | F | -1.83847700 | -1.87040800 | 2.03982100  |
| H      | 5.69882700  | -0.74247900 | -1.38608600 | C | 0.35087100  | -0.97921300 | -1.28876700 |
| C      | 4.69005100  | -2.66717500 | -1.20664300 | C | 0.90548100  | -0.53713600 | -2.48704200 |
| H      | 5.41634000  | -3.03774600 | -0.47110100 | C | 0.96621100  | -1.61333800 | -3.40977600 |
| H      | 4.99934900  | -3.04582600 | -2.18416900 | C | 0.44484800  | -2.70666400 | -2.76516000 |
| C      | 3.29018200  | -3.17677300 | -0.86357100 | N | 0.09447900  | -2.33484800 | -1.49286900 |
| H      | 2.59249200  | -2.90154700 | -1.66332600 | H | 1.19481500  | 0.48181600  | -2.69582900 |
| H      | 3.27525500  | -4.26760100 | -0.77887500 | H | 1.33687400  | -1.58649900 | -4.42415400 |
| C      | 2.79432300  | -2.59156300 | 0.45329700  | H | 0.30036200  | -3.72608700 | -3.09580900 |
| H      | 1.77031500  | -2.89761900 | 0.67261800  | C | -0.60533900 | -3.25038600 | -0.61030000 |

|         |             |             |             |        |             |             |             |
|---------|-------------|-------------|-------------|--------|-------------|-------------|-------------|
| H       | -1.67226000 | -3.29380100 | -0.85165900 | C      | 4.59083700  | -1.55284200 | -0.87578300 |
| H       | -0.17569000 | -4.25029300 | -0.72147500 | F      | 5.83376800  | -1.97845800 | -1.09132100 |
| H       | -0.50914800 | -2.93827900 | 0.42868600  | C      | 3.54318100  | -2.01488400 | -1.65459800 |
| NB13_TS |             |             |             | F      | 3.77490400  | -2.89687800 | -2.62857800 |
| N       | -2.48556500 | -0.75664900 | 0.68224500  | C      | 2.25381200  | -1.55312200 | -1.41036400 |
| H       | -1.13353800 | -0.74090000 | 1.29897300  | F      | 1.29916500  | -2.07354700 | -2.20893000 |
| B       | 0.42331900  | -0.10967400 | -0.03369600 | C      | 0.43505700  | 1.53786100  | 0.04637300  |
| C       | -2.16876000 | -0.10683000 | -0.63172400 | C      | -0.36108900 | 2.32004400  | 0.87412900  |
| H       | -2.14616900 | 0.96396400  | -0.40010500 | F      | -1.22810000 | 1.73562300  | 1.73744500  |
| C       | -0.76454100 | -0.52626400 | -1.08865100 | C      | -0.37052800 | 3.70885000  | 0.88874600  |
| H       | -0.57432600 | -0.03154300 | -2.04945500 | F      | -1.16613200 | 4.37386300  | 1.72801400  |
| H       | -0.76875300 | -1.59300900 | -1.32751400 | C      | 0.44708700  | 4.39751500  | 0.00866400  |
| C       | -2.82282600 | -2.18809900 | 0.59099500  | F      | 0.45869100  | 5.72815000  | -0.00532900 |
| H       | -2.08092800 | -2.67928900 | -0.04380200 | C      | 1.24033600  | 3.67490700  | -0.87004400 |
| H       | -3.80040400 | -2.30695000 | 0.09991800  | F      | 2.01532700  | 4.31845200  | -1.74138800 |
| C       | -2.86023600 | -2.81492600 | 1.98450000  | C      | 1.21072600  | 2.28590000  | -0.84250900 |
| H       | -1.86571700 | -2.74507100 | 2.44503800  | F      | 1.97755100  | 1.67733200  | -1.75845800 |
| H       | -3.10681600 | -3.87781900 | 1.89118800  | C      | 0.12148500  | -0.81854300 | 1.52253500  |
| C       | -3.87358700 | -2.09332500 | 2.87284200  | C      | 0.47543900  | -0.21636300 | 2.76308600  |
| H       | -4.88435800 | -2.25865500 | 2.47676500  | C      | 1.04158200  | -1.15290200 | 3.61459100  |
| H       | -3.85388700 | -2.50020800 | 3.88799700  | C      | 1.06172800  | -2.35406700 | 2.90571300  |
| C       | -3.57591200 | -0.59407400 | 2.88084000  | N      | 0.52786100  | -2.17491400 | 1.69456800  |
| H       | -4.33580600 | -0.04736300 | 3.44720300  | H      | 0.31715400  | 0.82599500  | 2.99269300  |
| H       | -2.60755700 | -0.40740900 | 3.36292900  | H      | 1.41105400  | -1.00321000 | 4.61769100  |
| C       | -3.52503500 | -0.05289800 | 1.45573200  | H      | 1.42717800  | -3.32803400 | 3.20717400  |
| H       | -4.50164100 | -0.19071800 | 0.96353600  | C      | 0.43750700  | -3.25797100 | 0.72665600  |
| H       | -3.28944300 | 1.01155400  | 1.45189700  | H      | 1.34977900  | -3.85627900 | 0.77465100  |
| C       | -3.27324400 | -0.31276800 | -1.65764900 | H      | -0.42271100 | -3.89868800 | 0.94389800  |
| C       | -4.32564100 | 0.60383300  | -1.73801300 | H      | 0.34971900  | -2.85649200 | -0.27925700 |
| H       | -4.32197500 | 1.47516500  | -1.08680700 | NB_P13 |             |             |             |
| C       | -5.36363600 | 0.42813500  | -2.64921900 | N      | 2.55578500  | -0.57955500 | -0.61863000 |
| H       | -6.16661000 | 1.15661300  | -2.70098400 | H      | 1.76609700  | -0.32977100 | -1.25066600 |
| C       | -5.36327400 | -0.67361200 | -3.49957800 | B      | -0.49657600 | -0.14322400 | -0.09270900 |
| H       | -6.16711000 | -0.81157900 | -4.21537700 | C      | 2.07533300  | -0.14809800 | 0.76990000  |
| C       | -4.31793600 | -1.59089600 | -3.43528000 | H      | 2.06203400  | 0.94341700  | 0.69311100  |
| H       | -4.30420500 | -2.44715200 | -4.10210000 | C      | 0.65052500  | -0.64567400 | 1.00462700  |
| C       | -3.28160000 | -1.40930000 | -2.52477800 | H      | 0.36830700  | -0.26765700 | 1.99525100  |
| H       | -2.46438100 | -2.12413300 | -2.50139100 | H      | 0.66831100  | -1.73181900 | 1.12811700  |
| C       | 1.92864800  | -0.64946100 | -0.40545500 | C      | 2.75215600  | -2.05391500 | -0.78421100 |
| C       | 3.02192800  | -0.21774900 | 0.34754800  | H      | 1.85066500  | -2.54458000 | -0.41403500 |
| F       | 2.84536800  | 0.67762100  | 1.33213400  | H      | 3.60087800  | -2.33397700 | -0.15321200 |
| C       | 4.32572400  | -0.64396300 | 0.13919800  | C      | 2.99834300  | -2.38481700 | -2.25138000 |
| F       | 5.32339000  | -0.18800000 | 0.89696600  | H      | 2.10119100  | -2.12994200 | -2.82881400 |

|   |             |             |             |        |             |             |             |
|---|-------------|-------------|-------------|--------|-------------|-------------|-------------|
| H | 3.14346800  | -3.46600600 | -2.33635500 | C      | -0.07772600 | -0.05385800 | -2.84298100 |
| C | 4.20221900  | -1.61967200 | -2.80036500 | C      | -0.11283000 | -1.00398500 | -3.89717800 |
| H | 5.11965600  | -1.95230400 | -2.29717800 | C      | -0.31616000 | -2.22736200 | -3.31060000 |
| H | 4.32567000  | -1.82404000 | -3.86694700 | N      | -0.38595800 | -2.05108300 | -1.95185700 |
| C | 4.00710100  | -0.12198600 | -2.56430700 | H      | 0.02427100  | 1.01340000  | -2.96800700 |
| H | 4.87898400  | 0.45122700  | -2.89137900 | H      | -0.00805900 | -0.81247600 | -4.95525700 |
| H | 3.14241800  | 0.23820900  | -3.13706500 | H      | -0.41288500 | -3.21544000 | -3.73913600 |
| C | 3.76718400  | 0.16317700  | -1.08747900 | C      | -0.76023700 | -3.14442700 | -1.07278800 |
| H | 4.60564900  | -0.16883600 | -0.46707200 | H      | -1.84488600 | -3.29275000 | -1.06744900 |
| H | 3.58383500  | 1.22219100  | -0.90417700 | H      | -0.27831300 | -4.06212200 | -1.42199100 |
| C | 3.10082000  | -0.51994800 | 1.82360300  | H      | -0.44651800 | -2.94683900 | -0.04882800 |
| C | 4.05482100  | 0.42395400  | 2.21380100  |        |             |             |             |
| H | 4.03892300  | 1.41406300  | 1.76367300  | N14_TS |             |             |             |
| C | 5.00932100  | 0.12142200  | 3.18058300  | B      | 0.42334000  | -0.10963400 | -0.03364300 |
| H | 5.73649500  | 0.87097100  | 3.47550500  | N      | -2.48577600 | -0.75643100 | 0.68225900  |
| C | 5.01991300  | -1.13684000 | 3.77428300  | H      | -1.13338000 | -0.74073300 | 1.29920800  |
| H | 5.75921800  | -1.37571100 | 4.53187800  | C      | -2.16883200 | -0.10668500 | -0.63168300 |
| C | 4.06793500  | -2.08288900 | 3.40305000  | H      | -2.14627700 | 0.96410900  | -0.40008100 |
| H | 4.06109900  | -3.06088600 | 3.87330900  | C      | -0.76457700 | -0.52611400 | -1.08856100 |
| C | 3.11239100  | -1.77522900 | 2.43962400  | H      | -0.57434100 | -0.03137500 | -2.04935400 |
| H | 2.36127500  | -2.51480800 | 2.17869200  | H      | -0.76881900 | -1.59284900 | -1.32746800 |
| C | -2.00579000 | -0.69711500 | 0.29243000  | C      | -2.82288800 | -2.18790200 | 0.59109800  |
| C | -3.09188500 | -0.24781300 | -0.46064600 | H      | -2.08089000 | -2.67910700 | -0.04357900 |
| F | -2.90162100 | 0.67729600  | -1.41222900 | H      | -3.80041700 | -2.30690500 | 0.09994900  |
| C | -4.39628200 | -0.68169400 | -0.27940100 | C      | -2.86041600 | -2.81462100 | 1.98465100  |
| F | -5.38878700 | -0.20455000 | -1.03169300 | H      | -3.10687100 | -3.87754800 | 1.89139100  |
| C | -4.67048300 | -1.62045300 | 0.70656000  | H      | -1.86596800 | -2.74461400 | 2.44531500  |
| F | -5.91625600 | -2.05194400 | 0.89823500  | C      | -3.87398100 | -2.09304100 | 2.87277200  |
| C | -3.63017300 | -2.10322200 | 1.48138000  | H      | -4.88466300 | -2.25848500 | 2.47651200  |
| F | -3.86819700 | -3.01753800 | 2.42528800  | H      | -3.85445200 | -2.49984300 | 3.88796400  |
| C | -2.33876600 | -1.63215700 | 1.26282300  | C      | -3.57642600 | -0.59376000 | 2.88069100  |
| F | -1.38907100 | -2.19349100 | 2.04207300  | H      | -4.33642700 | -0.04706000 | 3.44692000  |
| C | -0.49380300 | 1.52357000  | -0.02173500 | H      | -2.60814400 | -0.40699700 | 3.36289000  |
| C | 0.43157800  | 2.34262700  | -0.66105000 | C      | -3.52537800 | -0.05268500 | 1.45554600  |
| F | 1.44239900  | 1.80294700  | -1.39878700 | H      | -3.28980800 | 1.01177800  | 1.45168900  |
| C | 0.46871600  | 3.72919500  | -0.59286400 | H      | -4.50192700 | -0.19055200 | 0.96324600  |
| F | 1.40488000  | 4.41745200  | -1.25074000 | C      | -3.27319000 | -0.31265300 | -1.65775300 |
| C | -0.46607300 | 4.38929400  | 0.18503300  | C      | -4.32556100 | 0.60395700  | -1.73840000 |
| F | -0.45648600 | 5.71657900  | 0.27954300  | H      | -4.32203300 | 1.47533100  | -1.08724600 |
| C | -1.39423100 | 3.63445500  | 0.88445100  | C      | -5.36338000 | 0.42818200  | -2.64979700 |
| F | -2.28371700 | 4.24466700  | 1.66605600  | H      | -6.16634600 | 1.15665300  | -2.70177900 |
| C | -1.38262300 | 2.24757900  | 0.78035700  | C      | -5.36286200 | -0.67363900 | -3.50006100 |
| F | -2.29234500 | 1.62762800  | 1.54434700  | H      | -6.16655100 | -0.81165400 | -4.21601700 |
| C | -0.25977700 | -0.70150700 | -1.62449600 | C      | -4.31756200 | -1.59094400 | -3.43545700 |



|       |             |             |             |   |             |             |             |
|-------|-------------|-------------|-------------|---|-------------|-------------|-------------|
| H     | -4.30370100 | -2.44726000 | -4.10219800 | C | -0.65079900 | -0.64581000 | -1.00443000 |
| C     | -3.28141400 | -1.40927800 | -2.52476300 | H | -0.36850500 | -0.26807000 | -1.99514200 |
| H     | -2.46422200 | -2.12413100 | -2.50112600 | H | -0.66881700 | -1.73197300 | -1.12768100 |
| C     | 1.92860200  | -0.64963400 | -0.40535200 | C | -2.75259400 | -2.05290300 | 0.78502300  |
| C     | 3.02191400  | -0.21807800 | 0.34769400  | H | -1.85112800 | -2.54381100 | 0.41510100  |
| F     | 2.84540400  | 0.67721500  | 1.33236000  | H | -3.60132500 | -2.33313800 | 0.15413000  |
| C     | 4.32567400  | -0.64438100 | 0.13931200  | C | -2.99889400 | -2.38309800 | 2.25233300  |
| F     | 5.32338000  | -0.18855700 | 0.89712100  | H | -3.14420000 | -3.46422800 | 2.33779400  |
| C     | 4.59071100  | -1.55320200 | -0.87574100 | H | -2.10172100 | -2.12815200 | 2.82969700  |
| F     | 5.83360400  | -1.97892800 | -1.09129500 | C | -4.20264000 | -1.61748500 | 2.80094100  |
| C     | 3.54301900  | -2.01510200 | -1.65459300 | H | -5.12014200 | -1.95018200 | 2.29792400  |
| F     | 3.77468000  | -2.89708700 | -2.62860200 | H | -4.32611500 | -1.82136600 | 3.86761500  |
| C     | 2.25368700  | -1.55325300 | -1.41033100 | C | -4.00725000 | -0.11993300 | 2.56419100  |
| F     | 1.29898000  | -2.07360000 | -2.20888100 | H | -4.87901000 | 0.45362200  | 2.89099300  |
| C     | 0.43528400  | 1.53790100  | 0.04639400  | H | -3.14249100 | 0.24035600  | 3.13677400  |
| C     | -0.36090300 | 2.32017400  | 0.87402800  | C | -3.76728000 | 0.16451600  | 1.08723800  |
| F     | -1.22807700 | 1.73583500  | 1.73722400  | H | -3.58372400 | 1.22341300  | 0.90343500  |
| C     | -0.37022100 | 3.70898200  | 0.88859700  | H | -4.60580200 | -0.16762500 | 0.46696600  |
| F     | -1.16587300 | 4.37410400  | 1.72773400  | C | -3.10098200 | -0.52027300 | -1.82353700 |
| C     | 0.44755200  | 4.39754700  | 0.00857400  | C | -4.05461200 | 0.42358000  | -2.21475400 |
| F     | 0.45926200  | 5.72818600  | -0.00548000 | H | -4.03859000 | 1.41402300  | -1.76538200 |
| C     | 1.24082000  | 3.67484300  | -0.87002900 | C | -5.00884400 | 0.12056700  | -3.18165700 |
| F     | 2.01592900  | 4.31828400  | -1.74134700 | H | -5.73567100 | 0.87009000  | -3.47746700 |
| C     | 1.21108900  | 2.28584200  | -0.84245100 | C | -5.01958800 | -1.13814000 | -3.77439200 |
| F     | 1.97794000  | 1.67719300  | -1.75833200 | H | -5.75867300 | -1.37736300 | -4.53208000 |
| C     | 1.06092200  | -2.35401400 | 2.90615300  | C | -4.06803400 | -2.08419600 | -3.40207400 |
| C     | 1.04081400  | -1.15280200 | 3.61498300  | H | -4.06135200 | -3.06257200 | -3.87152200 |
| C     | 0.47516600  | -0.21617700 | 2.76327000  | C | -3.11273500 | -1.77604400 | -2.43858900 |
| C     | 0.12143100  | -0.81834200 | 1.52262400  | H | -2.36193500 | -2.51563100 | -2.17681600 |
| N     | 0.52750200  | -2.17479700 | 1.69484100  | C | 2.00551800  | -0.69751100 | -0.29221500 |
| H     | 1.42608600  | -3.32804600 | 3.20776000  | C | 3.09161400  | -0.24818100 | 0.46083500  |
| H     | 1.40996200  | -1.00316400 | 4.61821000  | F | 2.90139300  | 0.67714000  | 1.41223200  |
| H     | 0.31694600  | 0.82620900  | 2.99280600  | C | 4.39598300  | -0.68221200 | 0.27973300  |
| C     | 0.43748600  | -3.25778700 | 0.72680800  | F | 5.38848500  | -0.20503200 | 1.03200300  |
| H     | 0.34889100  | -2.85620600 | -0.27898600 | C | 4.67015400  | -1.62118900 | -0.70603500 |
| H     | 1.35021300  | -3.85545100 | 0.77424300  | F | 5.91590200  | -2.05277200 | -0.89762200 |
| H     | -0.42218200 | -3.89913800 | 0.94437500  | C | 3.62983700  | -2.10395600 | -1.48085300 |
| N14_P |             |             |             | F | 3.86780900  | -3.01837500 | -2.42466900 |
| B     | 0.49637000  | -0.14335700 | 0.09279100  | C | 2.33845200  | -1.63274600 | -1.26241700 |
| N     | -2.55602300 | -0.57865000 | 0.61876200  | F | 1.38877100  | -2.19407300 | -2.04168300 |
| H     | -1.76630400 | -0.32868100 | 1.25064100  | C | 0.49398800  | 1.52345200  | 0.02136100  |
| C     | -2.07555300 | -0.14792100 | -0.76996600 | C | -0.43104500 | 2.34296300  | 0.66057500  |
| H     | -2.06215800 | 0.94363100  | -0.69368900 | F | -1.44205800 | 1.80381300  | 1.39844600  |
|       |             |             |             | C | -0.46764700 | 3.72954000  | 0.59217800  |

|        |             |             |             |   |             |             |             |
|--------|-------------|-------------|-------------|---|-------------|-------------|-------------|
| F      | -1.40348000 | 4.41827000  | 1.25002400  | H | -4.46047200 | -2.98439500 | -3.48490800 |
| C      | 0.46726800  | 4.38914000  | -0.18598900 | C | -3.37950200 | -1.74514800 | -2.10196100 |
| F      | 0.45819100  | 5.71640800  | -0.28073900 | H | -2.48598200 | -2.35967300 | -2.15405700 |
| C      | 1.39500400  | 3.63381700  | -0.88543800 | C | 1.87190300  | -0.71154700 | -0.32197500 |
| F      | 2.28453300  | 4.24353800  | -1.66738300 | C | 3.00480400  | -0.17153100 | 0.28977000  |
| C      | 1.38285900  | 2.24696600  | -0.78111700 | F | 2.87972700  | 0.85228400  | 1.14905000  |
| F      | 2.29205100  | 1.62650500  | -1.54532200 | C | 4.29861400  | -0.61665300 | 0.05891900  |
| C      | 0.31583100  | -2.22672500 | 3.31115200  | F | 5.33684800  | -0.05470800 | 0.67855300  |
| C      | 0.11267800  | -1.00322200 | 3.89750400  | C | 4.51150500  | -1.65826400 | -0.83327300 |
| C      | 0.07758100  | -0.05330100 | 2.84311800  | F | 5.74423400  | -2.10242700 | -1.06886200 |
| C      | 0.25939800  | -0.70118100 | 1.62473800  | C | 3.42287000  | -2.23069000 | -1.46981000 |
| N      | 0.38542300  | -2.05074000 | 1.95235800  | F | 3.60477000  | -3.23550800 | -2.32857700 |
| H      | 0.41252000  | -3.21473500 | 3.73985600  | C | 2.14501400  | -1.74726300 | -1.20825700 |
| H      | 0.00796000  | -0.81151100 | 4.95555100  | F | 1.15047100  | -2.37856700 | -1.86586900 |
| H      | -0.02424800 | 1.01398700  | 2.96797900  | C | 0.37505100  | 1.50783600  | -0.08338700 |
| C      | 0.75941200  | -3.14430900 | 1.07346000  | C | -0.37563100 | 2.39417500  | 0.67857500  |
| H      | 0.44511700  | -2.94718100 | 0.04957400  | F | -1.16795400 | 1.93279300  | 1.67792300  |
| H      | 1.84406700  | -3.29249100 | 1.06765200  | C | -0.41309600 | 3.77014900  | 0.49127700  |
| H      | 0.27775400  | -4.06194300 | 1.42320400  | F | -1.15900200 | 4.54335700  | 1.28249000  |
| N15_TS |             |             |             | C | 0.32263000  | 4.33050500  | -0.53950300 |
| N      | -2.46237900 | -0.72395400 | 1.03456800  | F | 0.30167700  | 5.64424900  | -0.74933900 |
| B      | 0.38497000  | -0.13409000 | 0.06455300  | C | 1.06493500  | 3.49502300  | -1.36088200 |
| C      | -2.24251300 | -0.24452700 | -0.37178000 | F | 1.75945800  | 4.01012200  | -2.37395800 |
| H      | -2.23516700 | 0.84788500  | -0.28418500 | C | 1.06793400  | 2.12522000  | -1.12759700 |
| C      | -0.85683200 | -0.69421700 | -0.85317400 | F | 1.77793800  | 1.39612600  | -2.00079700 |
| H      | -0.73091900 | -0.32241000 | -1.87816800 | H | -4.71422000 | -2.28029500 | 0.27913000  |
| H      | -0.85089600 | -1.78197700 | -0.95654600 | H | -3.44234700 | -1.15402300 | 3.61743700  |
| C      | -2.71649900 | -2.17743100 | 1.16353500  | H | -2.23677400 | -2.50626900 | 2.09524300  |
| C      | -4.17641800 | -2.63134300 | 1.16204700  | H | -2.18527000 | -2.67150600 | 0.34625100  |
| H      | -4.71012500 | -2.29162600 | 2.05312600  | H | -3.20924200 | 1.13506400  | 1.58050100  |
| H      | -4.20063600 | -3.72427800 | 1.16206400  | H | -4.44012600 | -0.12541900 | 1.52298500  |
| C      | -3.21458600 | -0.12717300 | 3.31721900  | H | -1.07874300 | -0.58951400 | 1.54635800  |
| H      | -3.87800000 | 0.53678700  | 3.87620000  | C | 0.18320800  | -0.62490700 | 1.72195300  |
| H      | -2.18310500 | 0.09395100  | 3.60599100  | C | 0.62775000  | 0.15143100  | 2.82949200  |
| C      | -3.40568600 | 0.09017000  | 1.82137200  | C | 1.27539300  | -0.64980700 | 3.75682300  |
| C      | -3.40070000 | -0.61008700 | -1.28739700 | C | 1.25288600  | -1.94134700 | 3.23116100  |
| C      | -4.55339800 | 0.18257000  | -1.28095100 | N | 0.61599700  | -1.94274400 | 2.05777400  |
| H      | -4.57173000 | 1.08779600  | -0.67848800 | H | 0.47644000  | 1.21597300  | 2.91875800  |
| C      | -5.66898600 | -0.16603000 | -2.03595700 | H | 1.72232100  | -0.35391600 | 4.69383500  |
| H      | -6.55349600 | 0.46267100  | -2.01726100 | H | 1.65690300  | -2.86018400 | 3.63805400  |
| C      | -5.64459000 | -1.31548800 | -2.82211400 | C | 0.50317200  | -3.14531700 | 1.24470000  |
| H      | -6.51177000 | -1.59119500 | -3.41335900 | H | 1.46052300  | -3.67130400 | 1.24870900  |
| C      | -4.49380500 | -2.09778600 | -2.85960800 | H | -0.27375300 | -3.80808300 | 1.63466200  |
|        |             |             |             | H | 0.27036400  | -2.87934400 | 0.21768100  |

|       |             |             |             |        |             |             |             |
|-------|-------------|-------------|-------------|--------|-------------|-------------|-------------|
| N15_P |             |             |             | C      | 0.71722400  | 4.35451000  | -0.77882000 |
| N     | -2.60364100 | -0.32949000 | 0.93004100  | F      | 0.79109600  | 5.65327600  | -1.05859400 |
| B     | 0.46184200  | -0.08023500 | 0.16210200  | C      | 1.62067100  | 3.45839500  | -1.32749200 |
| C     | -2.19527700 | -0.15750400 | -0.54433700 | F      | 2.57129000  | 3.90188500  | -2.14880200 |
| H     | -2.19442600 | 0.92902600  | -0.67300400 | C      | 1.52646500  | 2.10269400  | -1.03046000 |
| C     | -0.78065600 | -0.69369300 | -0.75871800 | F      | 2.42814800  | 1.33891100  | -1.66188700 |
| H     | -0.55838800 | -0.50994700 | -1.81722500 | H      | -4.66148900 | -2.16162200 | 0.27450400  |
| H     | -0.80710700 | -1.78243000 | -0.67717800 | H      | -3.99510700 | -0.24666100 | 3.37356500  |
| C     | -2.80764000 | -1.76106400 | 1.36874700  | H      | -2.44018300 | -1.81045000 | 2.39732500  |
| C     | -4.23530000 | -2.28050300 | 1.27203500  | H      | -2.13377200 | -2.36331900 | 0.75804800  |
| H     | -4.89707800 | -1.80576900 | 2.00002400  | H      | -3.51044800 | 1.54721900  | 0.91876100  |
| H     | -4.21327200 | -3.34861100 | 1.50126700  | H      | -4.64612100 | 0.19113800  | 0.96037200  |
| C     | -3.73980100 | 0.69730000  | 2.88590200  | H      | -1.75293300 | -0.01837800 | 1.44278800  |
| H     | -4.48858100 | 1.43856500  | 3.17242000  | C      | 0.24595200  | -0.37662200 | 1.76368600  |
| H     | -2.76548300 | 1.02407500  | 3.26065900  | C      | 0.03298800  | 0.45468700  | 2.85821500  |
| C     | -3.71090300 | 0.57578000  | 1.37036200  | C      | -0.11307600 | -0.33253100 | 4.03221000  |
| C     | -3.26315400 | -0.73989700 | -1.45266700 | C      | 0.02792200  | -1.63995900 | 3.64257800  |
| C     | -4.39500000 | 0.01991100  | -1.76598200 | N      | 0.23409900  | -1.66913300 | 2.28592900  |
| H     | -4.46956300 | 1.04235600  | -1.40320300 | H      | 0.00627700  | 1.53338300  | 2.81891000  |
| C     | -5.41932500 | -0.50866700 | -2.54563500 | H      | -0.28321100 | 0.01875200  | 5.03972400  |
| H     | -6.28924000 | 0.09660400  | -2.77889200 | H      | 0.01534000  | -2.55754900 | 4.21418600  |
| C     | -5.31799000 | -1.80730000 | -3.03741000 | C      | 0.58973000  | -2.90386500 | 1.60890000  |
| H     | -6.11277600 | -2.22266300 | -3.64834700 | H      | 1.67358700  | -3.05776100 | 1.61007900  |
| C     | -4.18049100 | -2.56110900 | -2.76185900 | H      | 0.11200100  | -3.73717400 | 2.13029400  |
| H     | -4.08278700 | -3.56442200 | -3.16353400 | H      | 0.25352800  | -2.89914700 | 0.57271900  |
| C     | -3.15847400 | -2.03007000 | -1.98036700 | N17_TS |             |             |             |
| H     | -2.27031700 | -2.62451900 | -1.79258800 | B      | 0.02740100  | -0.17796600 | 0.02746000  |
| C     | 1.89568600  | -0.82111800 | -0.20200300 | N      | -2.70656600 | -1.53432700 | -0.28912800 |
| C     | 3.04437900  | -0.39401300 | 0.46631600  | H      | -1.49043100 | -1.15398100 | -1.09971700 |
| F     | 2.97399000  | 0.66007000  | 1.29164800  | C      | -2.40551200 | -0.81155000 | 0.97653900  |
| C     | 4.29301700  | -0.97977000 | 0.32241100  | H      | -2.72541100 | 0.22297900  | 0.79255000  |
| F     | 5.35008300  | -0.51520600 | 0.98964600  | C      | -0.88768500 | -0.80253500 | 1.25109800  |
| C     | 4.44133800  | -2.06031300 | -0.53764700 | H      | -0.61161900 | -1.84723600 | 1.45415400  |
| F     | 5.62926300  | -2.64328300 | -0.69151500 | C      | -4.00369600 | -1.17144100 | -0.91612100 |
| C     | 3.33565500  | -2.52497800 | -1.22795900 | H      | -4.63016400 | -0.65387800 | -0.18037000 |
| F     | 3.45303700  | -3.56956600 | -2.05167200 | H      | -3.83460700 | -0.48764500 | -1.75064700 |
| C     | 2.10484800  | -1.89875400 | -1.05206900 | C      | -4.64986400 | -2.49183200 | -1.35132300 |
| F     | 1.08405900  | -2.45607800 | -1.73995500 | H      | -4.33784900 | -2.75009000 | -2.36862800 |
| C     | 0.57263100  | 1.54818100  | -0.17009300 | H      | -5.74027400 | -2.43993500 | -1.33783600 |
| C     | -0.31800000 | 2.50079700  | 0.31603200  | C      | -4.07103400 | -3.50324000 | -0.35979300 |
| F     | -1.36490000 | 2.12888000  | 1.10452800  | H      | -4.13968900 | -4.53822000 | -0.70206600 |
| C     | -0.27505500 | 3.86306000  | 0.05108900  | H      | -4.57684000 | -3.42427900 | 0.60844800  |
| F     | -1.18729400 | 4.68548000  | 0.57507600  | C      | -2.63091300 | -3.01268100 | -0.23967800 |

|   |             |             |             |       |             |             |             |
|---|-------------|-------------|-------------|-------|-------------|-------------|-------------|
| H | -2.05007500 | -3.35326900 | -1.10886600 | C     | 0.66985700  | -3.22157400 | -0.87560400 |
| H | -2.11287800 | -3.35039900 | 0.66031600  | H     | 0.29323100  | -2.97194900 | 0.11318300  |
| C | -3.21589900 | -1.34514000 | 2.16756600  | H     | 0.22136500  | -4.16107800 | -1.20875600 |
| H | -2.97169400 | -2.40337500 | 2.33291300  | H     | 1.75430500  | -3.34023900 | -0.80825100 |
| H | -4.28934800 | -1.29578400 | 1.94496100  |       |             |             |             |
| C | -2.90567800 | -0.57588700 | 3.45269100  | N17_P |             |             |             |
| H | -3.22703100 | 0.46825300  | 3.33818000  | B     | 0.09846000  | -0.16035000 | -0.07634800 |
| H | -3.48133200 | -0.99485800 | 4.28458600  | N     | -2.83361900 | -1.25472100 | -0.14854700 |
| C | -1.40698100 | -0.60868800 | 3.74765400  | H     | -2.19870800 | -0.87805200 | -0.88139500 |
| H | -1.09095100 | -1.64528700 | 3.92984500  | C     | -2.30969300 | -0.66601500 | 1.15261800  |
| H | -1.18613600 | -0.04350300 | 4.65929100  | H     | -2.62170600 | 0.38353500  | 1.10297100  |
| C | -0.62678500 | -0.03937900 | 2.56480000  | C     | -0.77559100 | -0.73313000 | 1.22844500  |
| H | 0.44591100  | -0.03283800 | 2.77874100  | H     | -0.52873700 | -1.79149100 | 1.39462100  |
| H | -0.92244100 | 1.01090200  | 2.43226700  | C     | -4.24870600 | -0.84721700 | -0.48604800 |
| C | -0.29922100 | 1.43669600  | -0.06909200 | H     | -4.70256700 | -0.44338300 | 0.42047900  |
| C | 0.48546300  | 2.39247400  | 0.57984300  | H     | -4.20437700 | -0.05940500 | -1.23661600 |
| F | 1.56797100  | 2.02990500  | 1.28422900  | C     | -4.94273900 | -2.12770600 | -0.94734500 |
| C | 0.21299400  | 3.75480400  | 0.57613600  | H     | -4.78920500 | -2.27267900 | -2.02106800 |
| F | 1.01358800  | 4.60733200  | 1.21405300  | H     | -6.01644200 | -2.09603600 | -0.75565200 |
| C | -0.90916200 | 4.23050600  | -0.08516300 | C     | -4.21119000 | -3.22108800 | -0.16429500 |
| F | -1.18775000 | 5.53151700  | -0.09662500 | H     | -4.34755400 | -4.21761800 | -0.58744700 |
| C | -1.74050400 | 3.32554200  | -0.72327500 | H     | -4.54311300 | -3.24035400 | 0.87869000  |
| F | -2.83752600 | 3.74965200  | -1.35283100 | C     | -2.76364300 | -2.76036100 | -0.26523400 |
| C | -1.42162100 | 1.97365000  | -0.68757300 | H     | -2.35313800 | -2.97218700 | -1.25509900 |
| F | -2.30418100 | 1.16093800  | -1.31596400 | H     | -2.08505500 | -3.15437900 | 0.49089900  |
| C | 1.64597700  | -0.43296800 | 0.17140500  | C     | -2.98129700 | -1.31874400 | 2.36357100  |
| C | 2.27538800  | -1.28887900 | 1.06997500  | H     | -2.69607500 | -2.37775000 | 2.41799500  |
| F | 1.57001500  | -2.00215700 | 1.97229700  | H     | -4.07494800 | -1.27970900 | 2.28570600  |
| C | 3.64991300  | -1.50845900 | 1.10539700  | C     | -2.53212700 | -0.62242900 | 3.65276800  |
| F | 4.17739300  | -2.35039800 | 1.99621300  | H     | -2.90215800 | 0.41137800  | 3.64508700  |
| C | 4.46993300  | -0.85492600 | 0.20221200  | H     | -2.99276900 | -1.11761100 | 4.51306900  |
| F | 5.78613600  | -1.05348900 | 0.21533200  | C     | -1.00831400 | -0.60773800 | 3.77027800  |
| C | 3.89702900  | 0.00774800  | -0.72221000 | H     | -0.63389400 | -1.63363700 | 3.88581100  |
| F | 4.67055300  | 0.64758900  | -1.59933200 | H     | -0.70968600 | -0.05635600 | 4.66781600  |
| C | 2.52306500  | 0.19625100  | -0.71589900 | C     | -0.38705800 | 0.01466000  | 2.52136700  |
| F | 2.04871700  | 1.06171500  | -1.62547900 | H     | 0.70099800  | 0.05594200  | 2.61055600  |
| C | 0.79167500  | -2.13956700 | -3.06500400 | H     | -0.72675700 | 1.05727400  | 2.43778100  |
| C | 0.40396500  | -0.95503000 | -3.69495700 | C     | -0.14803300 | 1.48937100  | -0.12183400 |
| C | -0.29135900 | -0.22599500 | -2.74464700 | C     | 0.77211200  | 2.42818000  | 0.35616700  |
| C | -0.34486600 | -0.93874100 | -1.51241700 | F     | 1.94507700  | 2.04985100  | 0.88326000  |
| N | 0.34847400  | -2.15010100 | -1.80735600 | C     | 0.56207100  | 3.80280900  | 0.36432500  |
| H | 1.35749500  | -2.97649400 | -3.45630500 | F     | 1.50284600  | 4.62311200  | 0.83047100  |
| H | 0.61821700  | -0.68318600 | -4.71746100 | C     | -0.63643900 | 4.32380600  | -0.09657100 |
| H | -0.73323200 | 0.74783800  | -2.89484400 | F     | -0.85852800 | 5.63605900  | -0.08781600 |

|        |             |             |             |   |             |             |             |
|--------|-------------|-------------|-------------|---|-------------|-------------|-------------|
| C      | -1.60548700 | 3.44395200  | -0.54584400 | H | -1.13822418 | -1.80331010 | -0.47631214 |
| F      | -2.78760100 | 3.89963500  | -0.96748300 | H | 0.62092495  | -2.02742965 | -0.46580446 |
| C      | -1.33846100 | 2.08082300  | -0.53451400 | H | -0.15197060 | -1.17532194 | -1.79884650 |
| F      | -2.38560700 | 1.31546100  | -0.95040900 | C | -2.47085951 | 0.82817941  | -0.20265017 |
| C      | 1.71717100  | -0.49436300 | 0.08484900  | H | -2.68290163 | 0.14379253  | 0.61561992  |
| C      | 2.33768700  | -1.33651300 | 0.99950500  | H | -2.85951953 | 0.35777580  | -1.11209984 |
| F      | 1.63063900  | -1.98587900 | 1.95344500  | H | -3.04448577 | 1.74642211  | -0.03262425 |
| C      | 3.69676900  | -1.64050300 | 0.98818500  | C | -0.84950647 | 1.66545783  | -1.82472927 |
| F      | 4.21201700  | -2.47092200 | 1.89833600  | H | -1.01013827 | 0.85228546  | -2.54164882 |
| C      | 4.51039900  | -1.08880400 | 0.01514300  | H | 0.11038184  | 2.12882838  | -2.05212633 |
| F      | 5.81235600  | -1.36726500 | -0.01982800 | H | -1.62464712 | 2.41606973  | -2.01088791 |
| C      | 3.94559500  | -0.24372000 | -0.93163300 | N | -0.50940448 | -1.10039512 | 2.45364420  |
| F      | 4.71507300  | 0.29720300  | -1.87684200 | H | -0.48512343 | -0.31516104 | 3.70046956  |
| C      | 2.58779400  | 0.02842900  | -0.87472900 | C | -1.91954476 | -1.50939573 | 2.36503157  |
| F      | 2.11427700  | 0.86574300  | -1.80803300 | H | -2.10443829 | -2.04364491 | 1.42177561  |
| C      | -0.46557800 | -2.52718600 | -3.05211200 | H | -2.53914780 | -0.61261266 | 2.36636705  |
| C      | -1.02932200 | -1.41174100 | -3.61698200 | C | -2.30463094 | -2.40109089 | 3.54796333  |
| C      | -0.91857900 | -0.37346000 | -2.65381500 | H | -3.35185265 | -2.69983791 | 3.43261658  |
| C      | -0.30192500 | -0.86659600 | -1.50668400 | H | -2.22810641 | -1.82043742 | 4.47665238  |
| N      | -0.04086600 | -2.20573400 | -1.78716900 | C | -1.39149030 | -3.62082779 | 3.64941813  |
| H      | -0.31984300 | -3.52522000 | -3.44145800 | H | -1.53965523 | -4.26433413 | 2.77169371  |
| H      | -1.45111200 | -1.34164100 | -4.60909300 | H | -1.64282380 | -4.21588084 | 4.53202911  |
| H      | -1.23413300 | 0.64917000  | -2.79480600 | C | 0.06339006  | -3.15860084 | 3.69512427  |
| C      | 0.69315800  | -3.15821200 | -0.97279500 | H | 0.24332644  | -2.57800412 | 4.60922205  |
| H      | 0.50377100  | -2.99722800 | 0.08850400  | H | 0.74796760  | -4.01197795 | 3.70599885  |
| H      | 0.36881800  | -4.16737500 | -1.23917100 | C | 0.37304205  | -2.28455437 | 2.48475010  |
| H      | 1.77111300  | -3.07627400 | -1.14305200 | H | 1.40545239  | -1.93331834 | 2.50929689  |
|        |             |             |             | H | 0.23219419  | -2.86939177 | 1.56315740  |
| N18_TS |             |             |             | B | -0.13627099 | 1.86711479  | 3.48169198  |
| C      | 0.00000000  | 0.00000000  | 0.00000000  | C | -0.92121871 | 3.18790728  | 4.07084611  |
| C      | 0.00000000  | 0.00000000  | 1.58856437  | F | -2.51687201 | 3.40720429  | 2.31002254  |
| H      | 1.05605083  | 0.00000000  | 1.86544482  | C | -2.00127725 | 3.83549468  | 3.48354000  |
| C      | -0.59432959 | 1.37063824  | 1.98434035  | F | -3.70277259 | 5.48042232  | 3.42653963  |
| H      | -1.67796844 | 1.23957891  | 2.03378199  | C | -2.66463453 | 4.92025836  | 4.05006018  |
| C      | -0.37150474 | 2.14258115  | 0.66298860  | F | -2.86098928 | 6.44828670  | 5.83699292  |
| H      | -0.81589215 | 3.14074112  | 0.66324435  | C | -2.24375501 | 5.41152399  | 5.27387511  |
| C      | 1.12639598  | 2.12845096  | 0.25338616  | F | -0.75584313 | 5.25998005  | 7.09155315  |
| H      | 1.78557642  | 2.33768128  | 1.09483560  | C | -1.17201781 | 4.80064641  | 5.91110983  |
| H      | 1.33348758  | 2.88962360  | -0.50269080 | F | 0.48645489  | 3.18776586  | 5.97823150  |
| C      | 1.34741322  | 0.69265446  | -0.30605139 | C | -0.54791807 | 3.71927308  | 5.30746716  |
| H      | 2.18639152  | 0.17435845  | 0.17061147  | C | 1.49557314  | 2.09348995  | 3.56327316  |
| H      | 1.54235186  | 0.69478682  | -1.38268530 | F | 1.28411658  | 4.43068884  | 3.17345879  |
| C      | -0.98285669 | 1.15762923  | -0.37991790 | C | 2.06113450  | 3.35920119  | 3.38761972  |
| C      | -0.18208622 | -1.32596816 | -0.71420527 | F | 3.88935148  | 4.84401663  | 3.19217543  |

|       |             |             |            |   |             |             |             |
|-------|-------------|-------------|------------|---|-------------|-------------|-------------|
| C     | 3.42732838  | 3.60707849  | 3.36737597 | H | 15.90899100 | 5.05787300  | 4.43661300  |
| F     | 5.63232645  | 2.77202568  | 3.49132047 | H | 14.70930100 | 6.01471800  | 5.30712600  |
| C     | 4.31977603  | 2.55502567  | 3.51177035 | H | 15.00649000 | 6.31779300  | 3.60021400  |
| F     | 4.65008245  | 0.23969721  | 3.80189058 | N | 12.06164800 | 1.42417000  | 4.06849700  |
| C     | 3.81859667  | 1.27426737  | 3.66938677 | H | 11.07543500 | 1.31150000  | 3.75799300  |
| F     | 2.05678894  | -0.21260222 | 3.82238232 | C | 12.94959800 | 1.04030900  | 2.92922000  |
| C     | 2.44230296  | 1.08234744  | 3.68531200 | H | 13.97779100 | 1.25232200  | 3.23124900  |
| C     | -0.61772199 | 0.61344112  | 4.60253398 | H | 12.69381100 | 1.68995300  | 2.09436600  |
| C     | 0.12564385  | 0.23850039  | 5.75876065 | C | 12.77386800 | -0.42039300 | 2.53467800  |
| C     | -0.71907061 | 0.01609561  | 6.83639873 | H | 13.48396600 | -0.63346900 | 1.73032400  |
| C     | -2.00664529 | 0.27652304  | 6.37231788 | H | 11.76433800 | -0.55609400 | 2.12939500  |
| H     | 1.19905386  | 0.13362087  | 5.77728448 | C | 12.97511400 | -1.35555100 | 3.72319800  |
| H     | -0.45301062 | -0.28332145 | 7.83879007 | H | 14.00729700 | -1.27672300 | 4.08999600  |
| H     | -2.95343171 | 0.22888539  | 6.89635255 | H | 12.81725700 | -2.39446100 | 3.42235500  |
| N     | -1.96350189 | 0.62441106  | 5.08220135 | C | 11.99777300 | -0.96402400 | 4.82853600  |
| C     | -3.17859338 | 0.97954869  | 4.36174209 | H | 10.96907100 | -1.10224700 | 4.47930900  |
| H     | -2.93728610 | 1.45606535  | 3.41613871 | H | 12.13277200 | -1.58284700 | 5.72049600  |
| H     | -3.78670430 | 0.08800089  | 4.17651511 | C | 12.19722900 | 0.48872100  | 5.23663200  |
| H     | -3.75578785 | 1.68908811  | 4.95955393 | H | 11.44882400 | 0.80743100  | 5.96622100  |
|       |             |             |            | H | 13.19016800 | 0.63324200  | 5.65972500  |
| N18_P |             |             |            | B | 9.90343100  | 3.94479800  | 3.12998400  |
| C     | 13.40924200 | 3.53606200  | 5.04060600 | C | 9.51762800  | 4.58500600  | 1.64322000  |
| C     | 12.07215700 | 2.89772900  | 4.50265000 | F | 11.70780500 | 5.10383700  | 0.85956100  |
| H     | 11.34688900 | 2.85906400  | 5.32402400 | C | 10.36890700 | 5.10866800  | 0.67885100  |
| C     | 11.56363500 | 3.88129500  | 3.40390800 | F | 10.82725100 | 6.07121600  | -1.43628000 |
| H     | 11.94073200 | 3.49334900  | 2.45402300 | C | 9.94588600  | 5.60114300  | -0.55033800 |
| C     | 12.45328700 | 5.11571800  | 3.72067800 | F | 8.16699700  | 6.05860300  | -2.03135300 |
| H     | 12.38670000 | 5.88882800  | 2.95732800 | C | 8.59466000  | 5.59193800  | -0.85958700 |
| C     | 12.16287600 | 5.62200500  | 5.15560000 | F | 6.39289900  | 5.06012800  | -0.21705300 |
| H     | 11.09930700 | 5.68396600  | 5.37120000 | C | 7.69550900  | 5.08246800  | 0.06670100  |
| H     | 12.58199800 | 6.61945800  | 5.31097400 | F | 7.24639400  | 4.10368200  | 2.11670400  |
| C     | 12.84962100 | 4.56451000  | 6.05833900 | C | 8.16992300  | 4.59934600  | 1.28029500  |
| H     | 12.15704900 | 4.08891900  | 6.75991400 | C | 9.05226500  | 4.97068200  | 4.14298700  |
| H     | 13.66011500 | 4.98334200  | 6.65989000 | F | 10.27222000 | 6.76022000  | 3.16076500  |
| C     | 13.86850200 | 4.50674800  | 3.89389900 | C | 9.30311000  | 6.34192300  | 3.99508200  |
| C     | 14.50112100 | 2.67952600  | 5.66546400 | F | 8.98084500  | 8.63458800  | 4.47841100  |
| H     | 14.89208400 | 1.89782500  | 5.00607800 | C | 8.64534500  | 7.35761600  | 4.67168500  |
| H     | 14.17060400 | 2.21266500  | 6.59880500 | F | 6.98137900  | 7.98271800  | 6.22906500  |
| H     | 15.34399800 | 3.32971500  | 5.92010100 | C | 7.63065100  | 7.03301500  | 5.55905400  |
| C     | 14.47945500 | 3.88097000  | 2.63149400 | F | 6.33214900  | 5.35404800  | 6.56919000  |
| H     | 13.77391700 | 3.36768200  | 1.98277100 | C | 7.31237000  | 5.69976100  | 5.73187000  |
| H     | 15.28679400 | 3.18445200  | 2.89091000 | F | 7.55774900  | 3.47610100  | 5.26398900  |
| H     | 14.92889200 | 4.67259400  | 2.02468000 | C | 8.00382800  | 4.71710200  | 5.02438000  |
| C     | 14.92337800 | 5.53019100  | 4.35568400 | C | 9.42712300  | 2.36643600  | 3.09327800  |

|        |             |             |             |   |             |             |             |
|--------|-------------|-------------|-------------|---|-------------|-------------|-------------|
| C      | 8.98898300  | 1.49366400  | 4.08880600  | H | -4.51403600 | 1.98574400  | 1.09534100  |
| C      | 8.85792300  | 0.18195300  | 3.55828200  | H | -5.66909700 | 1.37331900  | -0.10002500 |
| C      | 9.25105300  | 0.25355700  | 2.24645700  | H | -4.78096800 | 2.85280300  | -0.41106700 |
| H      | 8.74860800  | 1.78229300  | 5.09825600  | C | -5.21748400 | -1.00121600 | 1.02924500  |
| H      | 8.49207800  | -0.69798300 | 4.06861200  | H | -4.96787600 | -0.53789500 | 1.98756300  |
| H      | 9.28455200  | -0.49953800 | 1.47150400  | H | -5.67283100 | -1.97028100 | 1.25334500  |
| N      | 9.61828500  | 1.55073900  | 1.97248900  | H | -5.97804400 | -0.39596000 | 0.54081600  |
| C      | 10.11146500 | 1.91025600  | 0.64941000  | C | -3.28966200 | -2.49873200 | 0.77118600  |
| H      | 10.98491500 | 2.56256300  | 0.71540600  | H | -2.30699000 | -2.65516700 | 0.34011100  |
| H      | 10.40259000 | 0.98937700  | 0.13895300  | H | -3.91023000 | -3.36571400 | 0.52445600  |
| H      | 9.34850800  | 2.41864600  | 0.05512400  | H | -3.19285300 | -2.45200200 | 1.85437100  |
|        |             |             |             | C | 2.05275700  | -0.85804300 | 0.03210400  |
| N19_TS |             |             |             | C | 2.63993800  | -1.52113700 | -1.03931600 |
| B      | 0.46812400  | -0.38789800 | 0.20652700  | F | 1.89807700  | -1.98500000 | -2.06196300 |
| C      | -0.16937700 | -0.89923300 | 1.64141200  | C | 4.00606800  | -1.76305500 | -1.15178700 |
| C      | 0.58150700  | -1.74822400 | 2.47241400  | F | 4.49104500  | -2.41911300 | -2.20754000 |
| H      | 1.56436100  | -2.06972100 | 2.14066600  | C | 4.86511300  | -1.30944900 | -0.16572700 |
| C      | 0.13685400  | -2.21853500 | 3.70388800  | F | 6.17472600  | -1.53004300 | -0.25533100 |
| H      | 0.77267800  | -2.86931800 | 4.29645400  | C | 4.33960400  | -0.61715700 | 0.91638600  |
| C      | -1.10949400 | -1.82987400 | 4.17547300  | F | 5.15131200  | -0.16087900 | 1.87042600  |
| H      | -1.47061700 | -2.16041800 | 5.14398900  | C | 2.97112900  | -0.39916300 | 0.98189800  |
| C      | -1.89061800 | -1.00735600 | 3.37540700  | F | 2.53841100  | 0.30919200  | 2.03564300  |
| H      | -2.87471900 | -0.70466400 | 3.72878600  | C | 0.63139200  | 1.25608100  | 0.06841300  |
| C      | -1.46290000 | -0.57065100 | 2.11633900  | C | 0.43052000  | 2.19034900  | 1.08437100  |
| C      | -2.42825900 | 0.35495500  | 1.39420300  | F | 0.00859500  | 1.81933800  | 2.30064100  |
| H      | -1.90620900 | 1.28873800  | 1.19922400  | C | 0.62310300  | 3.55986700  | 0.92833300  |
| H      | -3.24192300 | 0.59921100  | 2.08551900  | F | 0.37649400  | 4.39527500  | 1.93770300  |
| N      | -2.99356100 | -0.08677300 | 0.08582200  | C | 1.08582100  | 4.05762800  | -0.27886800 |
| C      | -3.96412200 | -1.25847400 | 0.17063100  | F | 1.27461300  | 5.36407000  | -0.44477300 |
| C      | -4.36317100 | -1.64216600 | -1.26428800 | C | 1.36909700  | 3.16767700  | -1.30391700 |
| H      | -3.46048300 | -2.00112400 | -1.77980200 | F | 1.85674300  | 3.61653700  | -2.46089700 |
| H      | -5.05821900 | -2.48665800 | -1.20231800 | C | 1.16563200  | 1.80924400  | -1.09955700 |
| C      | -4.97203000 | -0.49999900 | -2.06023000 | F | 1.53274000  | 1.01648700  | -2.12265800 |
| H      | -5.93308700 | -0.19722200 | -1.62891100 | C | -0.51813800 | -0.98117900 | -1.03713500 |
| H      | -5.18458600 | -0.82512400 | -3.08339000 | C | -0.70204500 | -0.47544400 | -2.36305800 |
| C      | -3.99596800 | 0.66502500  | -2.07960200 | C | -0.94390100 | -1.50562100 | -3.25524500 |
| H      | -4.43564600 | 1.53379200  | -2.58198500 | C | -0.83719200 | -2.68222600 | -2.51259600 |
| H      | -3.11169900 | 0.37366500  | -2.65699300 | N | -0.58799200 | -2.39802500 | -1.23427900 |
| C      | -3.54313400 | 1.12034300  | -0.68194300 | H | -0.72476500 | 0.57675600  | -2.60798800 |
| C      | -2.44288800 | 2.17651700  | -0.88615200 | H | -1.16915900 | -1.43479100 | -4.30860200 |
| H      | -1.48141000 | 1.73728400  | -1.13902900 | H | -0.91234100 | -3.71127100 | -2.84159900 |
| H      | -2.30112300 | 2.81543700  | -0.01076900 | C | -0.11923800 | -3.42250900 | -0.30878700 |
| H      | -2.74934200 | 2.82753900  | -1.70986800 | H | -0.47961600 | -4.39139900 | -0.65850500 |
| C      | -4.70084600 | 1.85350400  | 0.02687000  | H | 0.97380800  | -3.42327000 | -0.29447300 |

|       |             |             |             |        |             |             |             |
|-------|-------------|-------------|-------------|--------|-------------|-------------|-------------|
| H     | -0.47960000 | -3.23726700 | 0.69976600  | H      | -3.70391500 | -3.47343200 | -0.16262400 |
| H     | -1.70633200 | -0.58522500 | -0.59197000 | H      | -2.76109100 | -2.85050600 | 1.19789400  |
| N19_P |             |             |             | C      | 2.23813700  | -0.76265900 | -0.04888300 |
| B     | 0.60659800  | -0.46999500 | 0.04576700  | C      | 2.93366600  | -1.23945000 | -1.15643800 |
| C     | -0.05697400 | -1.17578100 | 1.39527700  | F      | 2.29064900  | -1.65158200 | -2.25864700 |
| C     | 0.68680700  | -2.15917700 | 2.07043800  | C      | 4.32173700  | -1.34399900 | -1.20645800 |
| H     | 1.67868200  | -2.40183300 | 1.70018800  | F      | 4.92576900  | -1.82848200 | -2.29342500 |
| C     | 0.23828300  | -2.84325900 | 3.19515000  | C      | 5.08054400  | -0.94081500 | -0.12099100 |
| H     | 0.87500500  | -3.58827400 | 3.66287400  | F      | 6.40870400  | -1.03546700 | -0.15264100 |
| C     | -1.00621000 | -2.54277000 | 3.73250700  | C      | 4.43906300  | -0.43775800 | 1.00267100  |
| H     | -1.36557600 | -3.03329600 | 4.63116500  | F      | 5.15758500  | -0.03401800 | 2.05189100  |
| C     | -1.77808900 | -1.58168500 | 3.09663000  | C      | 3.05486100  | -0.35147400 | 1.00703700  |
| H     | -2.74649100 | -1.32284600 | 3.52061300  | F      | 2.49495100  | 0.17314700  | 2.10896500  |
| C     | -1.34738200 | -0.93435200 | 1.93066700  | C      | 0.61245500  | 1.19013000  | 0.05397300  |
| C     | -2.30011000 | 0.12509200  | 1.41539400  | C      | 0.41240500  | 2.01407400  | 1.15983400  |
| H     | -1.75092400 | 1.04163100  | 1.23582300  | F      | 0.08510900  | 1.50188000  | 2.35821700  |
| H     | -3.04562200 | 0.33073000  | 2.18254900  | C      | 0.48686500  | 3.40371200  | 1.11905600  |
| N     | -3.07707400 | -0.11202800 | 0.12657600  | F      | 0.23539800  | 4.12847000  | 2.21127800  |
| C     | -3.97455700 | -1.37885700 | 0.09056700  | C      | 0.82900600  | 4.03623900  | -0.06461800 |
| C     | -4.65884500 | -1.44411100 | -1.28648700 | F      | 0.90686000  | 5.36391800  | -0.12501300 |
| H     | -3.88937800 | -1.69052400 | -2.02976400 | C      | 1.10953200  | 3.26238400  | -1.18199100 |
| H     | -5.35109700 | -2.29172800 | -1.24846400 | F      | 1.48312700  | 3.85149700  | -2.31828700 |
| C     | -5.37695500 | -0.17570700 | -1.71468700 | C      | 1.02699800  | 1.87851000  | -1.09128700 |
| H     | -6.23235400 | 0.03750800  | -1.06366700 | F      | 1.39861800  | 1.20495800  | -2.18830800 |
| H     | -5.78327500 | -0.30752200 | -2.72142900 | C      | -0.20282900 | -1.02730400 | -1.26090800 |
| C     | -4.38497100 | 0.97646700  | -1.70718000 | C      | -0.94657400 | -0.37113000 | -2.24089300 |
| H     | -4.86351600 | 1.91320400  | -2.01079500 | C      | -1.46000100 | -1.32674200 | -3.16311200 |
| H     | -3.58522400 | 0.77167000  | -2.43118300 | C      | -1.02418100 | -2.55215000 | -2.72752900 |
| C     | -3.74550400 | 1.22094100  | -0.33416300 | N      | -0.28245700 | -2.36729300 | -1.58825400 |
| C     | -2.66610000 | 2.30413900  | -0.49300900 | H      | -0.99079400 | 0.70166100  | -2.36830400 |
| H     | -1.75401300 | 1.92431300  | -0.95479800 | H      | -2.03623300 | -1.13347800 | -4.05724900 |
| H     | -2.40343700 | 2.77991000  | 0.45444400  | H      | -1.16709700 | -3.54315500 | -3.13417700 |
| H     | -3.07527100 | 3.08140500  | -1.14349000 | C      | 0.32747900  | -3.46945600 | -0.86913600 |
| C     | -4.78095200 | 1.74445400  | 0.66544600  | H      | 0.36447500  | -4.33570100 | -1.53138400 |
| H     | -4.38626600 | 1.81492500  | 1.68074300  | H      | 1.34536100  | -3.21144300 | -0.57630500 |
| H     | -5.70727400 | 1.17503000  | 0.68506400  | H      | -0.23928900 | -3.72225400 | 0.03232100  |
| H     | -5.03289700 | 2.76160500  | 0.35234000  | H      | -2.34826900 | -0.29982300 | -0.60026700 |
| C     | -4.99688700 | -1.39943400 | 1.22715400  | N20_TS |             |             |             |
| H     | -4.53930300 | -1.20444400 | 2.19889000  | B      | 1.06627000  | 0.02579300  | 0.06627100  |
| H     | -5.41088000 | -2.41049300 | 1.26798900  | C      | 0.05341900  | -0.20911200 | -1.21515200 |
| H     | -5.83018000 | -0.71357100 | 1.08278400  | C      | 0.53985300  | -0.91477600 | -2.32895400 |
| C     | -3.09585600 | -2.63295400 | 0.18573800  | H      | 1.52036900  | -1.37581900 | -2.26794900 |
| H     | -2.23022600 | -2.55363500 | -0.47372900 | C      | -0.16180900 | -1.02676800 | -3.52346300 |



|   |             |             |             |        |             |             |             |
|---|-------------|-------------|-------------|--------|-------------|-------------|-------------|
| H | 0.26969800  | -1.58099300 | -4.35178300 | C      | 4.50097400  | -2.00701800 | 0.49881200  |
| C | -1.40408400 | -0.41589300 | -3.65784400 | F      | 5.78772600  | -1.73780000 | 0.71832700  |
| H | -1.96091100 | -0.47977900 | -4.58735800 | C      | 4.07964700  | -3.32177400 | 0.38310600  |
| C | -1.91944900 | 0.28776300  | -2.57829600 | F      | 4.94823400  | -4.32409200 | 0.48991800  |
| H | -2.89069100 | 0.77085100  | -2.66644800 | C      | 2.73484900  | -3.57746900 | 0.16149100  |
| C | -1.21804800 | 0.38929100  | -1.37026800 | F      | 2.30662100  | -4.83548500 | 0.05295300  |
| C | -1.87462200 | 1.19626100  | -0.27445300 | C      | 1.84721900  | -2.51521200 | 0.05785600  |
| H | -2.42814900 | 2.02508100  | -0.72662700 | F      | 0.56056000  | -2.86331700 | -0.14818300 |
| H | -1.11948900 | 1.61219600  | 0.39022800  | C      | 1.70241400  | 1.51916700  | -0.24156900 |
| N | -2.82738400 | 0.42059100  | 0.60566800  | C      | 1.32471400  | 2.70922600  | 0.36548500  |
| C | -3.37680600 | 1.28463000  | 1.73527900  | F      | 0.45762200  | 2.70516400  | 1.40782400  |
| C | -4.25824600 | 2.39776000  | 1.15946900  | C      | 1.78360300  | 3.96734800  | -0.00931000 |
| H | -4.63048700 | 3.00285500  | 1.99275900  | F      | 1.36964800  | 5.06008400  | 0.63581200  |
| H | -3.63651900 | 3.06566900  | 0.55599100  | C      | 2.67741000  | 4.07426000  | -1.06041700 |
| C | -5.41454300 | 1.85244600  | 0.34134700  | F      | 3.13705600  | 5.26416700  | -1.44030700 |
| C | -5.08659700 | 0.58588700  | -0.41667300 | C      | 3.09117500  | 2.91864100  | -1.71002800 |
| C | -6.07012900 | 0.11453700  | -1.28905500 | F      | 3.95639700  | 3.00353000  | -2.71949000 |
| C | -5.92581300 | -1.09830000 | -1.93650800 | C      | 2.59830300  | 1.68946200  | -1.29892900 |
| H | -6.68826400 | -1.45529600 | -2.62111300 | F      | 3.04713700  | 0.62181500  | -1.97238400 |
| C | -4.79924600 | -1.86624700 | -1.67668700 | H      | -6.96058400 | 0.71951400  | -1.44074400 |
| H | -4.69423100 | -2.83094400 | -2.15908700 | H      | -6.25461800 | 1.61549800  | 1.00688500  |
| C | -3.78928800 | -1.43646000 | -0.81542600 | H      | -5.78772500 | 2.61175700  | -0.35308500 |
| C | -3.91935100 | -0.16822100 | -0.20316300 | C      | 0.36495400  | -0.17066600 | 1.53390100  |
| C | -2.65025400 | -2.39226100 | -0.51758800 | C      | -0.77868100 | -1.00122200 | 1.81542500  |
| H | -1.74307200 | -1.80264400 | -0.41158300 | C      | -0.84015900 | -1.14772800 | 3.26439600  |
| C | -2.35041300 | -3.39518800 | -1.63423600 | C      | 0.14139300  | -0.37822900 | 3.78134000  |
| H | -1.39580800 | -3.88359800 | -1.42255400 | N      | 0.86140300  | 0.19814400  | 2.72519400  |
| H | -2.26328200 | -2.89114200 | -2.60029600 | H      | -0.88615700 | -1.87909600 | 1.19008000  |
| H | -3.11452300 | -4.17652300 | -1.70736200 | H      | -1.54679100 | -1.74491000 | 3.82420100  |
| C | -2.95418900 | -3.13108300 | 0.79345300  | H      | 0.42429600  | -0.16094400 | 4.80173400  |
| H | -2.11978300 | -3.78265100 | 1.07527500  | C      | 2.04996900  | 1.00257700  | 2.98019500  |
| H | -3.84771200 | -3.75225400 | 0.67163100  | H      | 2.61610600  | 0.53345500  | 3.78710300  |
| H | -3.14496100 | -2.43261500 | 1.61612100  | H      | 2.66978700  | 1.03480200  | 2.08667500  |
| C | -2.26333400 | 1.96135600  | 2.54085100  | H      | 1.76915600  | 2.01726600  | 3.26745700  |
| H | -1.77174400 | 2.75952200  | 1.98395100  | H      | -1.87259400 | -0.37850600 | 1.26714600  |
| H | -1.51005600 | 1.26161700  | 2.90070700  |        |             |             |             |
| H | -2.73232800 | 2.41775900  | 3.41768600  | N21_TS |             |             |             |
| C | -4.16285100 | 0.35674800  | 2.66652300  | B      | -0.76776800 | -0.29938500 | 0.17167200  |
| H | -3.48380100 | -0.36296100 | 3.13360800  | C      | -0.05085200 | -0.79297000 | 1.57588100  |
| H | -4.94564400 | -0.19760600 | 2.14394700  | C      | -0.67288400 | -1.78565400 | 2.34770300  |
| H | -4.62865300 | 0.94615200  | 3.46138800  | H      | -1.65745700 | -2.13646000 | 2.05396600  |
| C | 2.21512200  | -1.17094800 | 0.14664700  | C      | -0.08351600 | -2.38374200 | 3.45849300  |
| C | 3.57354400  | -0.97733600 | 0.38347400  | H      | -0.62089500 | -3.15151700 | 4.00710400  |
| F | 4.07964000  | 0.26165300  | 0.52973700  | C      | 1.19013000  | -1.99820000 | 3.85216100  |

|   |             |             |             |       |             |             |             |
|---|-------------|-------------|-------------|-------|-------------|-------------|-------------|
| H | 1.67452900  | -2.45658500 | 4.70829400  | F     | -2.91268600 | 0.18395400  | 1.97435600  |
| C | 1.83113600  | -0.99512700 | 3.13381100  | C     | -4.58318900 | -0.97162300 | 0.85626600  |
| H | 2.82275500  | -0.66992100 | 3.43943200  | F     | -5.45860100 | -0.59610900 | 1.78848600  |
| C | 1.23524800  | -0.38752600 | 2.02427800  | C     | -5.00185700 | -1.75884300 | -0.20827800 |
| C | 2.01446700  | 0.76133600  | 1.41135500  | F     | -6.27275700 | -2.14296600 | -0.30317000 |
| H | 2.90299200  | 0.96035100  | 2.02218100  | C     | -4.07976300 | -2.13763100 | -1.16860500 |
| H | 1.40175100  | 1.66241200  | 1.43081800  | F     | -4.46464000 | -2.89371300 | -2.19849600 |
| N | 2.43340200  | 0.56478600  | -0.00245500 | C     | -2.75555400 | -1.72379900 | -1.05285300 |
| C | 2.45901700  | 1.80986200  | -0.78407900 | F     | -1.94153400 | -2.14020200 | -2.03992400 |
| C | 3.69977700  | 2.62976000  | -0.47003300 | C     | 0.27080100  | -0.76586400 | -1.08263000 |
| H | 3.74459700  | 2.82194700  | 0.61021100  | C     | 0.40743900  | -0.21546900 | -2.39952000 |
| H | 3.65338300  | 3.60477300  | -0.96466400 | C     | 0.84028900  | -1.18313000 | -3.28564500 |
| C | 4.95165700  | 1.87281700  | -0.91984100 | C     | 0.92722600  | -2.36649600 | -2.54704700 |
| H | 5.02324300  | 1.97256300  | -2.01292700 | N     | 0.60749700  | -2.14149900 | -1.27573900 |
| C | 4.83570200  | 0.38657500  | -0.60855700 | H     | 0.26606300  | 0.83253100  | -2.62282200 |
| C | 5.93827200  | -0.45761300 | -0.78005000 | H     | 1.07681400  | -1.07032500 | -4.33257100 |
| H | 6.86867500  | -0.03892800 | -1.15228100 | H     | 1.20946500  | -3.35881200 | -2.87547200 |
| C | 5.88361000  | -1.81160800 | -0.48304700 | C     | 0.41671500  | -3.21754100 | -0.31598200 |
| H | 6.76513900  | -2.43121000 | -0.62402300 | H     | 0.78318700  | -4.14218100 | -0.76440800 |
| C | 4.70561700  | -2.38338100 | 0.00358300  | H     | 0.94797800  | -3.02307900 | 0.61546800  |
| C | 3.59644100  | -1.56021000 | 0.15598700  | H     | -0.64763600 | -3.31957000 | -0.08801100 |
| H | 2.66668200  | -1.96986100 | 0.53159300  | H     | 1.28663600  | -0.21341200 | -0.60903000 |
| C | 3.64489100  | -0.19965500 | -0.15433500 | H     | 1.53054900  | 2.35093900  | -0.57775500 |
| C | 6.20110500  | 2.50556500  | -0.30024800 | H     | 2.45495300  | 1.52718400  | -1.84509200 |
| H | 6.21564800  | 3.58071500  | -0.50230000 |       |             |             |             |
| H | 7.12541700  | 2.08174100  | -0.69778500 | P1_TS |             |             |             |
| H | 6.20052400  | 2.36022000  | 0.78435500  | P     | 0.75231618  | -0.52826829 | 0.14960028  |
| C | 4.61440900  | -3.85421700 | 0.31757400  | C     | -0.03564892 | -1.05872422 | -1.39753878 |
| H | 3.84718600  | -4.04650600 | 1.07209500  | C     | -1.44013570 | -0.97002072 | -1.43123148 |
| H | 5.56604700  | -4.24013300 | 0.69075000  | B     | -2.30374423 | -0.40300572 | -0.18086519 |
| H | 4.35495200  | -4.42985900 | -0.57749000 | C     | 0.70307804  | -1.55607064 | -2.47690565 |
| C | -1.06368700 | 1.32605000  | 0.05593500  | C     | 0.04166182  | -1.96817115 | -3.62651606 |
| C | -0.96933000 | 2.24588500  | 1.10171400  | C     | -1.34982142 | -1.87758114 | -3.69032036 |
| F | -0.55195600 | 1.87426600  | 2.32014300  | C     | -2.07371612 | -1.38374723 | -2.61024650 |
| C | -1.29052600 | 3.59468900  | 0.98248400  | O     | -3.75311029 | -0.39930327 | -0.45475635 |
| F | -1.13959800 | 4.41896100  | 2.01909500  | O     | -1.94052516 | 1.01616068  | 0.11792117  |
| C | -1.79508200 | 4.07823800  | -0.21384700 | C     | -3.12378921 | 1.66293741  | 0.27218986  |
| F | -2.11165800 | 5.36357600  | -0.34530700 | C     | -3.33258332 | 2.96475153  | 0.68049917  |
| C | -1.98414800 | 3.19460300  | -1.26519400 | C     | -4.65945670 | 3.41919535  | 0.75998785  |
| F | -2.51225200 | 3.62549900  | -2.41103600 | C     | -5.72114798 | 2.58496530  | 0.43584464  |
| C | -1.64583000 | 1.85764900  | -1.09903000 | C     | -5.50255074 | 1.26199166  | 0.01804952  |
| F | -1.94999900 | 1.05829600  | -2.13626500 | C     | -4.19753597 | 0.81818457  | -0.05996112 |
| C | -2.27911200 | -0.94372100 | -0.00635900 | H     | -2.49183978 | 3.60391012  | 0.92832195  |
| C | -3.25353800 | -0.58353900 | 0.92769400  | H     | -4.85290426 | 4.43739197  | 1.08205056  |

|      |             |             |             |   |             |             |             |
|------|-------------|-------------|-------------|---|-------------|-------------|-------------|
| H    | -6.73825121 | 2.95699168  | 0.50635952  | C | -4.90499764 | 0.91510019  | -0.43923964 |
| H    | -6.32247507 | 0.60109544  | -0.24045885 | C | -4.22737993 | 0.32639217  | 0.64330725  |
| C    | 1.47174370  | 1.11722586  | -0.10418222 | B | -2.75123541 | 0.76462422  | 1.18935000  |
| C    | 2.10765501  | -1.68814587 | 0.49583918  | C | -6.17179647 | 0.47691028  | -0.86626663 |
| C    | 3.37111629  | -1.58261848 | -0.09718233 | C | -6.79961584 | -0.55889269 | -0.19425750 |
| C    | 4.34540327  | -2.54024263 | 0.16541806  | C | -6.16037886 | -1.15368449 | 0.89439321  |
| C    | 4.06560133  | -3.60641738 | 1.01816181  | C | -4.90312337 | -0.71947012 | 1.28966880  |
| C    | 2.81293644  | -3.71298634 | 1.61588248  | O | -2.88570681 | 1.23473985  | 2.61669896  |
| C    | 1.83642732  | -2.75414165 | 1.36119299  | O | -2.30170246 | 2.00913880  | 0.44592183  |
| H    | 3.59298258  | -0.74535394 | -0.75371200 | C | -1.95772180 | 2.91542617  | 1.39655288  |
| H    | 5.32435114  | -2.45435928 | -0.29499555 | C | -1.40234365 | 4.16397957  | 1.20735523  |
| H    | 4.82771521  | -4.35190392 | 1.22111559  | C | -1.23610988 | 4.98509966  | 2.33397940  |
| H    | 2.59791277  | -4.53797325 | 2.28706149  | C | -1.61887250 | 4.54613610  | 3.59547989  |
| H    | 0.86113251  | -2.82634788 | 1.84077409  | C | -2.17504671 | 3.27048425  | 3.78358073  |
| C    | 2.56586306  | 1.54360392  | 0.65685238  | C | -2.33477369 | 2.46112494  | 2.67240480  |
| C    | 3.05584234  | 2.83617950  | 0.50324794  | H | -1.12430117 | 4.49768903  | 0.21281224  |
| C    | 2.44984707  | 3.70975332  | -0.39665085 | H | -0.80190132 | 5.97246558  | 2.21362331  |
| C    | 1.35048464  | 3.29090322  | -1.14170924 | H | -1.48023040 | 5.19456518  | 4.45510044  |
| C    | 0.85642591  | 1.99861806  | -0.99942988 | H | -2.47807194 | 2.91859489  | 4.76370375  |
| H    | 3.03701181  | 0.86605059  | 1.36372828  | C | -4.34954742 | 3.86878376  | -0.35795383 |
| H    | 3.90850367  | 3.16161960  | 1.09035607  | C | -5.13155640 | 2.58492258  | -2.84260965 |
| H    | 2.83207143  | 4.71885463  | -0.51291772 | C | -6.21343870 | 3.46635398  | -2.91901826 |
| H    | 0.87168645  | 3.97321493  | -1.83627207 | C | -6.92112255 | 3.59025962  | -4.11106636 |
| H    | -0.01487895 | 1.67593908  | -1.56065137 | C | -6.55124113 | 2.83881888  | -5.22357237 |
| H    | 1.78601077  | -1.62928984 | -2.41500806 | C | -5.47258033 | 1.96000668  | -5.15010893 |
| H    | 0.60513279  | -2.35704164 | -4.46869177 | C | -4.76210127 | 1.83211354  | -3.96165920 |
| H    | -1.86826383 | -2.19759388 | -4.58960945 | H | -6.49541589 | 4.05589226  | -2.05132590 |
| H    | -3.15702053 | -1.31266442 | -2.65825106 | H | -7.75914419 | 4.27660191  | -4.17122006 |
| C    | -2.10162546 | -2.94087023 | 2.70097657  | H | -7.10336019 | 2.93932311  | -6.15232166 |
| C    | -2.19775835 | -1.78000166 | 3.45638759  | H | -5.18368262 | 1.37668349  | -6.01784574 |
| C    | -2.13235588 | -0.71400053 | 2.55023435  | H | -3.92279043 | 1.14315865  | -3.90388641 |
| C    | -1.96768281 | -1.22187917 | 1.24596085  | C | -3.99497585 | 5.08014376  | -0.95972283 |
| N    | -1.97064347 | -2.61231726 | 1.39636796  | C | -3.99873201 | 6.24681331  | -0.20431118 |
| H    | -2.12625353 | -3.97805135 | 3.00871743  | C | -4.35022040 | 6.20193057  | 1.14384198  |
| H    | -2.30520322 | -1.73219407 | 4.52975006  | C | -4.71178866 | 4.99673575  | 1.73715387  |
| H    | -2.15859572 | 0.34421075  | 2.77544132  | C | -4.71290843 | 3.82389448  | 0.98990557  |
| C    | -1.89374084 | -3.56904489 | 0.30545151  | H | -3.71321365 | 5.11246391  | -2.00939900 |
| H    | -2.66215960 | -3.34580832 | -0.43732785 | H | -3.71492579 | 7.18742742  | -0.66434234 |
| H    | -0.91531160 | -3.53052307 | -0.18358340 | H | -4.33097549 | 7.11069614  | 1.73655617  |
| H    | -2.05695563 | -4.57002325 | 0.70751279  | H | -4.95674444 | 4.95649096  | 2.79266191  |
| H    | -0.61141024 | -0.81547060 | 1.08199611  | H | -4.94661303 | 2.87331286  | 1.46301505  |
|      |             |             |             | H | -6.66400809 | 0.94019669  | -1.71544008 |
| P1_P |             |             |             | H | -7.77655303 | -0.90208854 | -0.51752822 |
| P    | -4.21277866 | 2.34052804  | -1.29731743 | H | -6.64738631 | -1.96380400 | 1.42939720  |

|       |             |             |             |      |             |             |             |
|-------|-------------|-------------|-------------|------|-------------|-------------|-------------|
| H     | -4.41674603 | -1.19905396 | 2.13467543  | C    | -0.73342614 | 4.20357807  | -0.06692328 |
| C     | -0.43197179 | -2.26844604 | 1.22319039  | H    | 0.10836451  | 2.40686654  | 0.78063982  |
| C     | -0.10447447 | -1.74885786 | -0.00638585 | C    | -1.73409915 | 4.74018933  | -0.87355991 |
| C     | -0.87721270 | -0.56993184 | -0.16488724 | H    | -3.46474810 | 4.31584443  | -2.08325767 |
| C     | -1.65958947 | -0.39332647 | 0.96411772  | H    | 0.01677373  | 4.85150100  | 0.37531093  |
| N     | -1.36850431 | -1.45118053 | 1.80089059  | H    | -1.76958566 | 5.80930209  | -1.05748359 |
| H     | -0.06604336 | -3.13946605 | 1.74883770  | O    | 2.89491304  | -0.85480484 | 0.19538245  |
| H     | 0.62059837  | -2.15976215 | -0.69454755 | O    | 1.44146678  | 0.77093330  | -0.66659742 |
| H     | -0.85499701 | 0.11183280  | -1.00497612 | C    | 2.76940000  | 1.14687863  | -1.00958575 |
| C     | -1.93808559 | -1.69597643 | 3.11061258  | C    | 2.88529054  | 2.66343462  | -0.90376656 |
| H     | -2.39923763 | -0.77746836 | 3.47341550  | H    | 3.91262562  | 2.99525653  | -1.09082392 |
| H     | -2.68445986 | -2.49862912 | 3.07826022  | H    | 2.23093556  | 3.12954628  | -1.64669907 |
| H     | -1.14792450 | -1.99117806 | 3.80643950  | H    | 2.57764339  | 3.01436999  | 0.08366571  |
| H     | -2.91212041 | 2.11753692  | -1.75153705 | C    | 3.06654000  | 0.71485700  | -2.44840149 |
| P2_TS |             |             |             | H    | 3.04920216  | -0.37488616 | -2.53405677 |
| C     | -1.44941513 | -0.06871429 | 2.64630812  | H    | 2.29735301  | 1.13278355  | -3.10559144 |
| C     | -0.72598560 | -0.11731808 | 1.44805814  | H    | 4.04207057  | 1.07763614  | -2.78717257 |
| C     | 0.63250270  | -0.48202587 | 1.40261024  | C    | 3.63445140  | 0.34783082  | 0.02268191  |
| C     | 1.23531674  | -0.79082117 | 2.63103756  | C    | 5.03453402  | -0.00453743 | -0.46585250 |
| C     | 0.53172215  | -0.74219146 | 3.82959911  | H    | 5.60219551  | 0.89863097  | -0.71604641 |
| C     | -0.81622751 | -0.37900537 | 3.84217685  | H    | 5.57179269  | -0.53841647 | 0.32311937  |
| H     | -2.50356507 | 0.19741210  | 2.64092566  | H    | 4.99121430  | -0.65143507 | -1.34344932 |
| H     | 2.28244017  | -1.08378738 | 2.62197711  | C    | 3.73834656  | 1.08325473  | 1.36395282  |
| H     | 1.02927965  | -0.99360604 | 4.76230764  | H    | 2.75140909  | 1.38898022  | 1.72342983  |
| H     | -1.36791009 | -0.34502487 | 4.77636727  | H    | 4.17622799  | 0.40642950  | 2.10340623  |
| B     | 1.49030131  | -0.54057893 | -0.00301140 | H    | 4.37588452  | 1.97014423  | 1.29014593  |
| P     | -1.50690975 | 0.19694050  | -0.16174198 | H    | -0.39560255 | -0.83852879 | -0.98896804 |
| C     | -3.19917471 | -0.46885658 | -0.05954638 | C    | 0.73223342  | -1.64385088 | -1.04804508 |
| C     | -4.27338147 | 0.23370653  | 0.49836608  | C    | 0.65069593  | -1.64083714 | -2.45900529 |
| C     | -3.39865727 | -1.77142508 | -0.52972888 | C    | 0.23442129  | -2.89869441 | -2.90938014 |
| C     | -5.52506860 | -0.36634138 | 0.59407666  | C    | 0.09450906  | -3.68689464 | -1.77504308 |
| H     | -4.12948161 | 1.25214029  | 0.84998208  | N    | 0.38104371  | -2.94910713 | -0.68171963 |
| C     | -4.65076611 | -2.37044807 | -0.42648441 | H    | 0.81185731  | -0.75350114 | -3.05560884 |
| H     | -2.56968236 | -2.31225583 | -0.98444170 | H    | 0.05055636  | -3.21220042 | -3.92609012 |
| C     | -5.71359267 | -1.66837480 | 0.13500446  | H    | -0.18199224 | -4.72892417 | -1.68033931 |
| H     | -6.35445749 | 0.18265343  | 1.02843277  | C    | 0.41162901  | -3.47529593 | 0.67449187  |
| H     | -4.79769063 | -3.38093058 | -0.79391796 | H    | 0.27786068  | -4.55714153 | 0.62860295  |
| H     | -6.69155224 | -2.13292276 | 0.21020666  | H    | 1.37595252  | -3.24538786 | 1.13115518  |
| C     | -1.64522502 | 1.99350292  | -0.39526521 | H    | -0.38025885 | -3.03352680 | 1.28491868  |
| C     | -2.64058397 | 2.53173403  | -1.21830044 | P2_P |             |             |             |
| C     | -0.68422080 | 2.83488685  | 0.17503563  | C    | -1.36066600 | -0.30050300 | 2.58096200  |
| C     | -2.68643222 | 3.90285661  | -1.44955887 | C    | -0.57785600 | -0.28985000 | 1.41712200  |
| H     | -3.38322664 | 1.88186346  | -1.67343939 | C    | 0.79628900  | -0.58407700 | 1.40970000  |

|   |             |             |             |       |             |             |             |
|---|-------------|-------------|-------------|-------|-------------|-------------|-------------|
| C | 1.35753300  | -0.87368200 | 2.66303100  | H     | 5.36518700  | 1.85328900  | -0.63388400 |
| C | 0.60430700  | -0.88167400 | 3.83234700  | H     | 5.63963600  | 0.56611100  | 0.55223400  |
| C | -0.76281700 | -0.59902800 | 3.79649600  | H     | 5.21496400  | 0.14516200  | -1.11149300 |
| H | -2.42517400 | -0.08145300 | 2.53929700  | C     | 3.37510100  | 1.71050200  | 1.35388400  |
| H | 2.42434700  | -1.08122900 | 2.70098700  | H     | 2.31646500  | 1.79026400  | 1.62097800  |
| H | 1.08083800  | -1.10668400 | 4.78276300  | H     | 3.89453500  | 1.21584200  | 2.18034700  |
| H | -1.35386800 | -0.61045700 | 4.70640000  | H     | 3.78746100  | 2.71942800  | 1.24525200  |
| B | 1.71316800  | -0.56693600 | 0.03217400  | H     | -0.65043500 | -0.32405500 | -1.19278700 |
| P | -1.38323100 | 0.17844000  | -0.12153700 | C     | 1.38803900  | -1.88529300 | -0.87453500 |
| C | -2.99772600 | -0.61814900 | -0.25895600 | C     | 0.81306700  | -1.99437100 | -2.13591000 |
| C | -4.16213500 | -0.05003000 | 0.26774900  | C     | 0.70888300  | -3.37272900 | -2.47790400 |
| C | -3.03792400 | -1.87008900 | -0.88258700 | C     | 1.23002500  | -4.07660700 | -1.41722000 |
| C | -5.36628300 | -0.74033900 | 0.17167000  | N     | 1.63410300  | -3.17649500 | -0.46622600 |
| H | -4.13007600 | 0.92927900  | 0.73832500  | H     | 0.54976100  | -1.15064100 | -2.76324000 |
| C | -4.24749200 | -2.55106600 | -0.97502000 | H     | 0.32789400  | -3.79802700 | -3.39649500 |
| H | -2.12928400 | -2.30778200 | -1.29173200 | H     | 1.36418300  | -5.13857500 | -1.26378000 |
| C | -5.40738800 | -1.98745000 | -0.44859000 | C     | 2.24935000  | -3.53760400 | 0.79599600  |
| H | -6.27265900 | -0.30300000 | 0.57718300  | H     | 2.73270700  | -4.51191900 | 0.69479500  |
| H | -4.28310800 | -3.52024900 | -1.46122700 | H     | 3.00448700  | -2.78978500 | 1.04700900  |
| H | -6.34975100 | -2.52065000 | -0.52487600 | H     | 1.51130600  | -3.58930400 | 1.60331700  |
| C | -1.59025100 | 1.96615100  | -0.25251800 |       |             |             |             |
| C | -2.51742900 | 2.50318700  | -1.15196600 | P3_TS |             |             |             |
| C | -0.78319700 | 2.80252600  | 0.52096400  | C     | 1.42801573  | -0.45525537 | -0.23735703 |
| C | -2.63596100 | 3.88354500  | -1.27052800 | C     | 0.07249712  | -0.46158026 | -0.21460409 |
| H | -3.14312800 | 1.85036100  | -1.75425500 | C     | 2.23808858  | -0.85283216 | -1.43327448 |
| C | -0.91255600 | 4.18245600  | 0.39850900  | C     | 2.86537110  | -2.09452422 | -1.57240470 |
| H | -0.05273600 | 2.36995000  | 1.19846600  | C     | 2.40841973  | 0.10726222  | -2.43943267 |
| C | -1.83597100 | 4.72069900  | -0.49460700 | C     | 3.65838227  | -2.36011410 | -2.68692919 |
| H | -3.35162600 | 4.30428000  | -1.96896500 | H     | 2.72270952  | -2.86330906 | -0.82232951 |
| H | -0.28646200 | 4.83592400  | 0.99716800  | C     | 3.19932849  | -0.16061346 | -3.55071802 |
| H | -1.93219000 | 5.79781300  | -0.58885300 | H     | 1.91214321  | 1.06862853  | -2.33565811 |
| O | 3.14873600  | -0.46193600 | 0.34043600  | C     | 3.83406667  | -1.39447492 | -3.67325584 |
| O | 1.36929000  | 0.68581600  | -0.69819800 | H     | 4.13576126  | -3.32995168 | -2.78464753 |
| C | 2.58887900  | 1.32233800  | -1.05724000 | H     | 3.32170211  | 0.59540051  | -4.31957532 |
| C | 2.36132600  | 2.82664000  | -1.13545200 | H     | 4.45460601  | -1.60564521 | -4.53819549 |
| H | 3.29321400  | 3.35496900  | -1.36670400 | C     | -0.50932577 | -1.16401645 | -1.41134068 |
| H | 1.63877000  | 3.04912200  | -1.92769200 | C     | -0.93295010 | -0.50143831 | -2.55897496 |
| H | 1.96226900  | 3.22035800  | -0.19830400 | C     | -0.48907815 | -2.55764640 | -1.48176529 |
| C | 3.03959000  | 0.80032900  | -2.42478400 | C     | -1.45466812 | -1.17131013 | -3.65751638 |
| H | 3.24592700  | -0.27227600 | -2.38034200 | C     | -1.01022526 | -3.25525700 | -2.56153288 |
| H | 2.23355100  | 0.96177800  | -3.14750100 | C     | -1.51186316 | -2.55658417 | -3.65090216 |
| H | 3.93230900  | 1.32083300  | -2.78735100 | F     | 0.11520418  | -3.27712060 | -0.52821650 |
| C | 3.55871300  | 0.86982600  | 0.08494100  | F     | -0.99295111 | -4.58627275 | -2.57665217 |
| C | 5.03128200  | 0.86164700  | -0.30841700 | F     | -2.00579734 | -3.21099246 | -4.69664737 |

|   |             |             |             |      |             |             |             |
|---|-------------|-------------|-------------|------|-------------|-------------|-------------|
| F | -1.85583469 | -0.49363611 | -4.72971766 | F    | -2.59530398 | 3.80163578  | -2.35679570 |
| F | -0.75620520 | 0.81751104  | -2.67911671 | F    | -0.77794867 | 5.65344598  | -1.52261227 |
| B | -0.94388774 | 0.32756293  | 0.87452846  | F    | 0.91276307  | 5.02333891  | 0.54663096  |
| P | 2.37951815  | 0.22204343  | 1.16299503  | F    | 0.76565393  | 2.68493559  | 1.73285139  |
| C | 3.65521001  | 1.33102808  | 0.46415633  | C    | -0.65566409 | 0.16552512  | 4.65552574  |
| C | 3.53015364  | 2.72110522  | 0.54042492  | C    | -0.17710675 | -1.10015003 | 4.34657165  |
| C | 4.74631486  | 0.76978269  | -0.21580687 | C    | -0.02693436 | -1.12426188 | 2.96198795  |
| C | 4.48273871  | 3.53879383  | -0.06416410 | C    | -0.35907970 | 0.14271766  | 2.41456111  |
| H | 2.69882873  | 3.17319384  | 1.06532559  | N    | -0.78408416 | 0.89136375  | 3.52731887  |
| C | 5.69263702  | 1.59266496  | -0.81335491 | H    | -0.90870565 | 0.59672409  | 5.61495859  |
| H | 4.84645629  | -0.30957589 | -0.28946603 | H    | 0.02887987  | -1.89278121 | 5.04962198  |
| C | 5.56128929  | 2.97835081  | -0.73933949 | H    | 0.29404742  | -1.96357324 | 2.36365264  |
| H | 4.37358946  | 4.61656181  | -0.00304904 | C    | -1.36337983 | 2.22857693  | 3.52542719  |
| H | 6.52919280  | 1.14911612  | -1.34316246 | H    | -1.96840896 | 2.33772195  | 4.42620005  |
| H | 6.30060198  | 3.61949592  | -1.20886646 | H    | -0.58735880 | 2.99480175  | 3.51564318  |
| C | 3.30614323  | -1.18101506 | 1.86291026  | H    | -2.00906871 | 2.34911166  | 2.65669310  |
| C | 2.81279595  | -2.48638283 | 1.77219178  | H    | 1.04932387  | 0.46326883  | 2.10481840  |
| C | 4.47115288  | -0.93591865 | 2.59945548  |      |             |             |             |
| C | 3.48016092  | -3.53247059 | 2.40367608  | P3_P |             |             |             |
| H | 1.91553155  | -2.68774007 | 1.19309633  | C    | -1.34240000 | -0.40864100 | 0.25433500  |
| C | 5.13504963  | -1.98404420 | 3.22673650  | C    | 0.01255000  | -0.37196600 | 0.25298600  |
| H | 4.86385227  | 0.07454786  | 2.67263142  | C    | -2.14925600 | -0.77427500 | 1.46960900  |
| C | 4.63987752  | -3.28306317 | 3.13120985  | C    | -2.78761900 | -2.00881400 | 1.62221600  |
| H | 3.09272595  | -4.54277356 | 2.32248992  | C    | -2.29028300 | 0.19410500  | 2.47215900  |
| H | 6.03973580  | -1.78579409 | 3.79195084  | C    | -3.55429000 | -2.26647000 | 2.75722500  |
| H | 5.15873379  | -4.09950324 | 3.62289582  | H    | -2.67553700 | -2.77588900 | 0.86490400  |
| C | -2.47243744 | -0.29072237 | 0.98136943  | C    | -3.05817900 | -0.06446200 | 3.60198800  |
| C | -2.69029468 | -1.66356797 | 1.06314627  | H    | -1.78972600 | 1.15200100  | 2.35250000  |
| C | -3.63067051 | 0.46126280  | 1.17835946  | C    | -3.69841200 | -1.29453200 | 3.74334300  |
| C | -3.92976141 | -2.26039674 | 1.25199228  | H    | -4.03739500 | -3.23203400 | 2.86905000  |
| C | -4.89354013 | -0.08383572 | 1.37522564  | H    | -3.15938400 | 0.69543800  | 4.37026600  |
| C | -5.04997228 | -1.46031639 | 1.40607279  | H    | -4.29870400 | -1.49889400 | 4.62426800  |
| C | -0.95595328 | 1.88082119  | 0.29509856  | C    | 0.59988500  | -0.99239100 | 1.49694100  |
| C | -0.07745902 | 2.88234817  | 0.68848179  | C    | 1.16859200  | -0.27854300 | 2.54858300  |
| C | -1.80116262 | 2.27009008  | -0.74447572 | C    | 0.50601500  | -2.37371800 | 1.69094500  |
| C | 0.01310942  | 4.13854388  | 0.10366740  | C    | 1.70699900  | -0.89539500 | 3.67073800  |
| C | -1.76196914 | 3.51281560  | -1.36023792 | C    | 1.03964200  | -3.01615000 | 2.79633800  |
| C | -0.83837396 | 4.45974794  | -0.93971910 | C    | 1.65708400  | -2.27330900 | 3.79133200  |
| F | -4.04215074 | -3.58767855 | 1.30684822  | F    | -0.16247700 | -3.14015500 | 0.82204000  |
| F | -1.65108671 | -2.51105336 | 0.98184826  | F    | 0.93329800  | -4.33791700 | 2.92248700  |
| F | -3.59467401 | 1.80838845  | 1.20525720  | F    | 2.16429500  | -2.87489900 | 4.86295300  |
| F | -5.95246196 | 0.70853081  | 1.54389810  | F    | 2.23367600  | -0.15906300 | 4.64737100  |
| F | -6.25039395 | -2.00237793 | 1.59390228  | F    | 1.14079800  | 1.05785700  | 2.56671000  |
| F | -2.71724546 | 1.41866482  | -1.22313511 | B    | 1.03372700  | 0.38391000  | -0.84419000 |

|   |             |             |             |       |             |             |             |
|---|-------------|-------------|-------------|-------|-------------|-------------|-------------|
| P | -2.46025000 | 0.05732800  | -1.10717000 | F     | -1.00857900 | 2.46226900  | -0.61156400 |
| C | -3.84519300 | 1.05562200  | -0.49443400 | C     | -0.65412800 | 0.96395200  | -4.25693500 |
| C | -3.93370100 | 2.38330400  | -0.92527900 | C     | -0.77675000 | -0.40117600 | -4.14314400 |
| C | -4.83211900 | 0.52831200  | 0.34830000  | C     | -0.13489000 | -0.75777700 | -2.93198400 |
| C | -4.98876600 | 3.18480900  | -0.49813400 | C     | 0.34333600  | 0.39274100  | -2.31282900 |
| H | -3.18119800 | 2.79570200  | -1.59052100 | N     | 0.03936800  | 1.43407400  | -3.16470400 |
| C | -5.88059700 | 1.33550400  | 0.77177100  | H     | -0.94989800 | 1.64041400  | -5.04672500 |
| H | -4.78220300 | -0.50582500 | 0.67580900  | H     | -1.26407800 | -1.05952100 | -4.84887900 |
| C | -5.95781800 | 2.66294000  | 0.35265000  | H     | -0.01807600 | -1.75467600 | -2.52801500 |
| H | -5.05013400 | 4.21500000  | -0.83242400 | C     | 0.49066000  | 2.81541500  | -3.08065600 |
| H | -6.63844800 | 0.92584300  | 1.43123900  | H     | -0.24109600 | 3.45431300  | -2.57904400 |
| H | -6.77923100 | 3.28907200  | 0.68636900  | H     | 1.43943600  | 2.85636600  | -2.54733700 |
| C | -3.17000400 | -1.45161300 | -1.81462000 | H     | 0.64945000  | 3.19046700  | -4.09326100 |
| C | -2.50263000 | -2.67437400 | -1.69964600 | H     | -1.96011100 | 0.86226500  | -2.12960400 |
| C | -4.37389700 | -1.36661900 | -2.51894600 |       |             |             |             |
| C | -3.04646500 | -3.81147800 | -2.28710000 | P4_TS |             |             |             |
| H | -1.56882200 | -2.73560000 | -1.14687600 | C     | 0.50960855  | 0.06083150  | -1.97147237 |
| C | -4.90569600 | -2.50777800 | -3.11204800 | H     | 0.94891230  | 0.68343848  | -2.75913999 |
| H | -4.89569800 | -0.41727400 | -2.60289200 | H     | 0.51288678  | -0.97811807 | -2.31293694 |
| C | -4.24400300 | -3.72746100 | -2.99456600 | C     | -0.93276723 | 0.45130187  | -1.59403291 |
| H | -2.53207100 | -4.76202900 | -2.19310400 | H     | -0.93364554 | 1.44743253  | -1.12891433 |
| H | -5.83922200 | -2.44332200 | -3.66106000 | H     | -1.49098857 | 0.57057935  | -2.53072907 |
| H | -4.66423700 | -4.61686000 | -3.45322100 | P     | 1.49536065  | 0.16307365  | -0.41697630 |
| C | 2.46455000  | -0.38029500 | -1.13885800 | B     | -1.70215002 | -0.70705417 | -0.71756059 |
| C | 2.65007100  | -1.75505400 | -1.11192800 | C     | -3.27250782 | -0.32443870 | -0.50639833 |
| C | 3.53162100  | 0.31332700  | -1.70909600 | C     | -4.31176777 | -1.15496191 | -0.91366216 |
| C | 3.81396300  | -2.39893900 | -1.51767200 | C     | -3.68118919 | 0.87023773  | 0.07414307  |
| C | 4.71312600  | -0.27638100 | -2.12789000 | C     | -5.65592614 | -0.83228824 | -0.75674087 |
| C | 4.86165300  | -1.65193600 | -2.02410400 | C     | -5.00657813 | 1.23764658  | 0.25623424  |
| C | 1.23773100  | 1.86286200  | -0.12277800 | C     | -6.00584830 | 0.37369135  | -0.16896104 |
| C | 0.18109400  | 2.76161700  | -0.03780600 | C     | 2.84591770  | -1.07169708 | -0.25071536 |
| C | 2.37971100  | 2.29645000  | 0.54992700  | C     | 3.30837352  | -1.25597532 | 1.07769260  |
| C | 0.23239500  | 4.00175100  | 0.58068000  | C     | 3.35550411  | -1.89647574 | -1.27507835 |
| C | 2.48977900  | 3.52903400  | 1.18011600  | C     | 4.26854493  | -2.22708391 | 1.34249108  |
| C | 1.40836600  | 4.39524300  | 1.19633400  | C     | 4.31323210  | -2.86352298 | -0.95310293 |
| F | 3.91595200  | -3.72852400 | -1.44067100 | C     | 4.78515109  | -3.04669616 | 0.34025505  |
| F | 1.65149700  | -2.56779500 | -0.71779000 | H     | 4.62059669  | -2.35037403 | 2.36436705  |
| F | 3.44658000  | 1.64425700  | -1.89843200 | H     | 4.70378881  | -3.48973608 | -1.75209524 |
| F | 5.69970000  | 0.46093100  | -2.64366300 | C     | 2.17139235  | 1.86363778  | -0.26913060 |
| F | 5.98739000  | -2.24281400 | -2.42447900 | C     | 3.23671322  | 2.33294952  | -1.06840306 |
| F | 3.44323200  | 1.49380800  | 0.69247700  | C     | 1.57914510  | 2.72143042  | 0.68092818  |
| F | 3.61962600  | 3.87047800  | 1.80175300  | C     | 3.69449139  | 3.63577313  | -0.88836474 |
| F | 1.49308300  | 5.57793900  | 1.80218600  | C     | 2.07146219  | 4.02068981  | 0.82055068  |
| F | -0.83300700 | 4.80833800  | 0.57768900  | C     | 3.12913046  | 4.49497045  | 0.05245597  |

|   |             |             |             |      |             |             |             |
|---|-------------|-------------|-------------|------|-------------|-------------|-------------|
| H | 4.51491373  | 3.99220126  | -1.50734285 | H    | -1.62301868 | -1.74325415 | -1.34263007 |
| H | 1.60829841  | 4.67905891  | 1.55132217  |      |             |             |             |
| C | 3.88488313  | 1.48960736  | -2.13484033 | P4_P |             |             |             |
| H | 4.29228428  | 0.55944402  | -1.73013931 | C    | 0.61648900  | -0.47140700 | -2.09748700 |
| H | 3.16213574  | 1.22782001  | -2.91391943 | H    | 0.99283700  | 0.19961800  | -2.87755700 |
| H | 4.69812131  | 2.03801466  | -2.61378287 | H    | 1.16721200  | -1.41112500 | -2.13896700 |
| C | 3.66253334  | 5.89162497  | 0.23307939  | C    | -0.89694700 | -0.74217000 | -2.19333200 |
| H | 3.81437307  | 6.38160965  | -0.73234119 | H    | -1.44088100 | 0.20713200  | -2.07600300 |
| H | 2.97974933  | 6.50392217  | 0.82559853  | H    | -1.07491700 | -1.03093800 | -3.23642000 |
| H | 4.62917522  | 5.87304780  | 0.74672888  | P    | 0.97161700  | 0.33356500  | -0.49760900 |
| C | 0.42043714  | 2.29680662  | 1.55014501  | B    | -1.46174700 | -1.94627700 | -1.16034200 |
| H | -0.45555389 | 2.02370676  | 0.95472377  | C    | -2.53210600 | -1.27628800 | -0.09750300 |
| H | 0.67070846  | 1.42843682  | 2.16796219  | C    | -3.75011500 | -0.85791400 | -0.64629600 |
| H | 0.12904497  | 3.11234856  | 2.21513977  | C    | -2.42412400 | -0.99318200 | 1.25665900  |
| C | 2.92583145  | -1.83341454 | -2.72179829 | C    | -4.76457500 | -0.23420500 | 0.06612500  |
| H | 2.03275237  | -2.44377648 | -2.89708295 | C    | -3.40594300 | -0.36788000 | 2.01847200  |
| H | 2.70149901  | -0.82174835 | -3.05477138 | C    | -4.59380000 | 0.01138200  | 1.42092800  |
| H | 3.71812324  | -2.23102433 | -3.35981535 | C    | 2.50504000  | -0.04798900 | 0.40915600  |
| C | 5.82388857  | -4.08877500 | 0.66004293  | C    | 2.52989800  | 0.33367900  | 1.76935000  |
| H | 6.73077316  | -3.62550093 | 1.06006146  | C    | 3.61586500  | -0.70027300 | -0.16753400 |
| H | 5.45555977  | -4.78856023 | 1.41607426  | C    | 3.67952000  | 0.08202000  | 2.51763900  |
| H | 6.09913825  | -4.66161462 | -0.22772184 | C    | 4.74008100  | -0.91781900 | 0.62645200  |
| C | 2.77832087  | -0.44349119 | 2.23358618  | C    | 4.79718000  | -0.53495200 | 1.96537600  |
| H | 2.89292461  | 0.63171117  | 2.06291438  | H    | 3.69414200  | 0.37875400  | 3.56322500  |
| H | 1.71187695  | -0.64339867 | 2.39952197  | H    | 5.59871300  | -1.41440100 | 0.18084900  |
| H | 3.31368360  | -0.69690852 | 3.15064506  | C    | 0.75695400  | 2.13691900  | -0.68912000 |
| F | -6.61411001 | -1.66812396 | -1.16530557 | C    | 1.74861000  | 2.88900300  | -1.36045000 |
| F | -7.28923858 | 0.69898130  | -0.00974868 | C    | -0.39534600 | 2.77648000  | -0.18164600 |
| F | -5.32927282 | 2.40044822  | 0.82900115  | C    | 1.57253200  | 4.26256100  | -1.49749600 |
| F | -2.75557475 | 1.75103879  | 0.52301849  | C    | -0.51811300 | 4.15810600  | -0.34729200 |
| F | -4.05554005 | -2.33929103 | -1.48775175 | C    | 0.44875900  | 4.91836900  | -0.99601500 |
| H | 0.11540003  | -0.36540153 | 0.53226328  | H    | 2.33814700  | 4.83743700  | -2.01323000 |
| C | -1.02162823 | -1.03562588 | 0.79579512  | H    | -1.40507700 | 4.64947600  | 0.04370500  |
| C | -1.36132860 | -0.50232983 | 2.06772967  | C    | 2.98745500  | 2.26991000  | -1.95619900 |
| C | -1.02465028 | -1.40968063 | 3.07150734  | H    | 3.59296600  | 1.75521900  | -1.20487000 |
| C | -0.49540486 | -2.52515054 | 2.42587219  | H    | 2.73865300  | 1.54976900  | -2.74250800 |
| N | -0.50609005 | -2.31669713 | 1.10007591  | H    | 3.60986700  | 3.04068700  | -2.41439400 |
| H | -1.80212347 | 0.47619078  | 2.20302378  | C    | 0.29723100  | 6.40538500  | -1.16338400 |
| H | -1.14155869 | -1.29315474 | 4.13875046  | H    | 1.11637700  | 6.93765700  | -0.67004500 |
| H | -0.10542640 | -3.44674675 | 2.83777042  | H    | 0.32027600  | 6.68193300  | -2.22190700 |
| C | -0.05169654 | -3.27868710 | 0.11308680  | H    | -0.64389400 | 6.76134900  | -0.73945800 |
| H | 0.48003710  | -4.08222389 | 0.62502098  | C    | -1.51940500 | 2.05346900  | 0.51927800  |
| H | -0.90038361 | -3.67895456 | -0.44430264 | H    | -2.01711200 | 1.34165400  | -0.14629400 |
| H | 0.63242183  | -2.79892540 | -0.59189520 | H    | -1.17750100 | 1.49997100  | 1.40038400  |



|       |             |             |             |   |             |             |             |
|-------|-------------|-------------|-------------|---|-------------|-------------|-------------|
| H     | -2.27019900 | 2.77000100  | 0.85793100  | C | -2.16744400 | 2.02731800  | -1.44732200 |
| C     | 3.65378900  | -1.23299700 | -1.57716700 | C | -2.64373200 | 3.32826900  | -1.26836300 |
| H     | 3.08213800  | -2.16740200 | -1.63317800 | C | -3.34252200 | 3.72516800  | -0.13370100 |
| H     | 3.25296100  | -0.53637200 | -2.31535800 | C | -3.59343200 | 2.76078700  | 0.83585700  |
| H     | 4.68463000  | -1.45711400 | -1.85915900 | C | -3.13884800 | 1.44899100  | 0.71488100  |
| C     | 6.02598100  | -0.81185100 | 2.78774300  | C | 3.09786400  | -0.59738100 | -0.34646000 |
| H     | 6.09232200  | -1.87682500 | 3.03341000  | C | 3.72191400  | -1.73503900 | -0.86551000 |
| H     | 6.93386000  | -0.54590100 | 2.23942500  | C | 5.09819600  | -1.90303200 | -0.94903300 |
| H     | 6.01302100  | -0.25173600 | 3.72517900  | C | 5.93900200  | -0.90317800 | -0.48555800 |
| C     | 1.35446000  | 0.97232500  | 2.46512500  | C | 5.37840200  | 0.23766400  | 0.06357700  |
| H     | 1.05143600  | 1.90762900  | 1.98411000  | C | 3.99454400  | 0.36177200  | 0.12293900  |
| H     | 0.48887200  | 0.29983100  | 2.48632800  | C | 0.94129400  | 1.03523600  | 0.15379900  |
| H     | 1.61137700  | 1.20376000  | 3.50008400  | C | 1.24656900  | 2.11474700  | -0.68076900 |
| F     | -5.90110600 | 0.13192400  | -0.53418200 | C | 0.78566000  | 3.40882700  | -0.49654000 |
| F     | -5.54904600 | 0.61815500  | 2.12835000  | C | -0.00871600 | 3.70032900  | 0.60465700  |
| F     | -3.19264100 | -0.09857200 | 3.31146400  | C | -0.30655000 | 2.68797200  | 1.49545800  |
| F     | -1.27294400 | -1.22970500 | 1.92859000  | C | 0.16596300  | 1.40310900  | 1.24909600  |
| F     | -3.98694000 | -1.02618500 | -1.95768100 | C | -6.24738500 | -4.80307300 | -0.30457700 |
| H     | -0.05817800 | -0.06848300 | 0.35185300  | C | -2.35847800 | -2.69112900 | 1.98494700  |
| C     | -0.21590200 | -2.83553200 | -0.61548900 | C | -1.43169600 | 1.76383600  | -2.74069600 |
| C     | 0.64403000  | -2.84301400 | 0.48014200  | C | -3.76280300 | 5.15659600  | 0.06044000  |
| C     | 1.69283800  | -3.77787100 | 0.25745300  | C | -3.42478600 | 0.51013100  | 1.86108200  |
| C     | 1.46544200  | -4.33085900 | -0.97825600 | F | 2.99746300  | -2.77225400 | -1.32045800 |
| N     | 0.32997700  | -3.76129400 | -1.49722000 | F | 5.61612100  | -3.01699800 | -1.46915000 |
| H     | 0.52658600  | -2.25040700 | 1.37409500  | F | 7.26093700  | -1.04402600 | -0.55701300 |
| H     | 2.50895700  | -4.01751200 | 0.92551000  | F | 6.16564000  | 1.20569100  | 0.53533400  |
| H     | 2.00019900  | -5.09259200 | -1.52881500 | F | 3.55832300  | 1.48915400  | 0.71655100  |
| C     | -0.21232200 | -4.13101400 | -2.79104600 | F | 2.03649500  | 1.92412900  | -1.75065300 |
| H     | 0.46777700  | -4.84534000 | -3.25894400 | F | 1.07567800  | 4.36961500  | -1.37494600 |
| H     | -1.19732100 | -4.59090900 | -2.68803900 | F | -0.49884900 | 4.92744400  | 0.77936200  |
| H     | -0.30917100 | -3.25889100 | -3.44353400 | F | -1.08862000 | 2.92521100  | 2.55099700  |
| H     | -2.16109000 | -2.68384800 | -1.82499800 | F | -0.25402800 | 0.48439000  | 2.15138300  |
|       |             |             |             | H | -1.13282800 | -0.75694500 | -2.82429100 |
| P5_TS |             |             |             | H | -0.88088100 | -2.20738400 | -1.90094000 |
| P     | -1.70175600 | -0.63784000 | -0.40940900 | H | 1.05203500  | 0.01672200  | -2.43816500 |
| B     | 1.45175500  | -0.48774800 | -0.29206900 | H | 1.32609900  | -1.68036200 | -2.21080500 |
| C     | -0.71007800 | -1.12489000 | -1.89210000 | H | -5.72891300 | -2.94166400 | -2.20843200 |
| C     | 0.80933500  | -0.82002500 | -1.77914400 | H | -4.33990600 | -4.33002900 | 1.58738700  |
| C     | -3.09071600 | -1.83983000 | -0.35861800 | H | -4.13508300 | 3.04047300  | 1.73602000  |
| C     | -5.02094000 | -2.88446900 | -1.38427600 | H | -7.22377000 | -4.33967200 | -0.47228900 |
| C     | -5.15236400 | -3.76976000 | -0.31222100 | H | -6.09365600 | -5.53774800 | -1.10096800 |
| C     | -4.24868800 | -3.66146700 | 0.73362200  | H | -6.28192400 | -5.33844600 | 0.64637400  |
| C     | -3.22049500 | -2.71045900 | 0.74114900  | H | -1.56041400 | -1.95140500 | 1.96800300  |
| C     | -2.40977400 | 1.06569100  | -0.43786300 | H | -1.89607300 | -3.67016400 | 2.13739200  |

|      |             |             |             |   |             |             |             |
|------|-------------|-------------|-------------|---|-------------|-------------|-------------|
| H    | -2.98746900 | -2.48236600 | 2.85699600  | C | -3.42630300 | 2.94100800  | 0.62549100  |
| H    | -1.27794400 | 2.70673400  | -3.26892200 | C | -3.05112800 | 1.60260500  | 0.61385100  |
| H    | -0.44887200 | 1.31958800  | -2.58362700 | C | 3.20164400  | -0.57353600 | -0.42154500 |
| H    | -2.00378300 | 1.10554000  | -3.40326500 | C | 3.86434000  | -1.63147500 | -1.04900900 |
| H    | -3.96482300 | 5.64469500  | -0.89584500 | C | 5.22593100  | -1.65571700 | -1.31932400 |
| H    | -2.96072100 | 5.71182000  | 0.55650300  | C | 6.01774500  | -0.58323800 | -0.94317100 |
| H    | -4.65772700 | 5.22734900  | 0.68297100  | C | 5.42249000  | 0.48613900  | -0.29803300 |
| H    | -2.50615100 | 0.04968900  | 2.23210700  | C | 4.05381600  | 0.46561400  | -0.05421200 |
| H    | -3.87425200 | 1.06194300  | 2.68862500  | C | 0.96259900  | 0.76479500  | 0.42860000  |
| H    | -4.11384900 | -0.28854700 | 1.57075400  | C | 1.11158700  | 1.89465800  | -0.37832700 |
| C    | -4.01302700 | -1.92899600 | -1.43105600 | C | 0.56530000  | 3.13810100  | -0.10854400 |
| C    | -3.94943000 | -1.02816500 | -2.64085200 | C | -0.16631700 | 3.31910500  | 1.05449100  |
| H    | -3.77640400 | 0.01514000  | -2.36470700 | C | -0.32533100 | 2.24782600  | 1.91297100  |
| H    | -3.14983600 | -1.33776200 | -3.32155200 | C | 0.22531700  | 1.01326300  | 1.58309000  |
| H    | -4.88776400 | -1.07825100 | -3.19645000 | C | -6.88048500 | -4.22121600 | -0.56721800 |
| H    | -2.43672800 | 4.06376600  | -2.04260900 | C | -2.59739800 | -2.88860700 | 1.68048600  |
| H    | -0.36933000 | -1.17002800 | 0.57679400  | C | -1.23983300 | 1.55630200  | -2.80729500 |
| C    | 1.39938800  | -3.04940400 | 2.49855100  | C | -3.49023800 | 5.26023400  | -0.35792700 |
| C    | 0.93414000  | -3.86948400 | 1.47762800  | C | -3.37104300 | 0.76240900  | 1.82612200  |
| C    | 0.67289000  | -3.02614600 | 0.40041900  | F | 3.19574900  | -2.73585100 | -1.42627500 |
| C    | 0.93261100  | -1.67781600 | 0.75980600  | F | 5.78016600  | -2.70863800 | -1.92822700 |
| N    | 1.40247900  | -1.76900100 | 2.08637500  | F | 7.32952200  | -0.58763200 | -1.18685200 |
| H    | 1.74150200  | -3.30602600 | 3.49290600  | F | 6.16725800  | 1.52477400  | 0.09422700  |
| H    | 0.81253500  | -4.94118700 | 1.52678100  | F | 3.59299200  | 1.54120100  | 0.61749000  |
| H    | 0.30600200  | -3.33395100 | -0.56930100 | F | 1.83444100  | 1.82105700  | -1.51285600 |
| C    | 2.03458800  | -0.70991800 | 2.86555100  | F | 0.69762800  | 4.14554800  | -0.97548400 |
| H    | 2.96451200  | -1.09406700 | 3.28926100  | F | -0.73753400 | 4.49351800  | 1.32405600  |
| H    | 2.27485400  | 0.13203400  | 2.21878200  | F | -1.07818300 | 2.38716300  | 3.00972800  |
| H    | 1.37661600  | -0.36803600 | 3.66591700  | F | -0.07117200 | 0.01980600  | 2.45255000  |
|      |             |             |             | H | -1.12682500 | -1.51540100 | -2.51054500 |
| P5_P |             |             |             | H | -0.76662100 | -2.48220800 | -1.10500500 |
| P    | -1.89817800 | -0.66039000 | -0.41419500 | H | 0.88160800  | -0.14578600 | -2.17883800 |
| B    | 1.57001800  | -0.69835100 | -0.09697500 | H | 1.30287500  | -1.83002300 | -2.05064900 |
| C    | -0.68108200 | -1.46712600 | -1.51069200 | H | -6.16387700 | -2.27995200 | -2.31978700 |
| C    | 0.78891500  | -1.01870100 | -1.52590300 | H | -4.84947700 | -4.23906900 | 1.25008600  |
| C    | -3.38737000 | -1.70046800 | -0.45929600 | H | -3.95483400 | 3.32714800  | 1.49340200  |
| C    | -5.44058100 | -2.38687400 | -1.51471900 | H | -6.83786700 | -5.00304300 | 0.19391800  |
| C    | -5.65363500 | -3.35095200 | -0.52879000 | H | -7.78281200 | -3.62664100 | -0.39146800 |
| C    | -4.70568900 | -3.48347900 | 0.48235000  | H | -6.99183400 | -4.69927900 | -1.54466500 |
| C    | -3.56748700 | -2.67767600 | 0.54358400  | H | -2.57319800 | -2.02535400 | 2.35616900  |
| C    | -2.34211700 | 1.10190800  | -0.51040800 | H | -1.56980000 | -3.06425700 | 1.34275100  |
| C    | -2.02928100 | 1.95157700  | -1.58528300 | H | -2.89843800 | -3.75511100 | 2.27197500  |
| C    | -2.43727200 | 3.28822800  | -1.52084100 | H | -0.23186100 | 1.98198100  | -2.75222500 |
| C    | -3.12809900 | 3.80358000  | -0.43180300 | H | -1.13647800 | 0.48271300  | -2.94092500 |

|       |             |             |             |   |             |             |             |
|-------|-------------|-------------|-------------|---|-------------|-------------|-------------|
| H     | -1.71672700 | 1.96003900  | -3.70472500 | H | 0.63715539  | 2.58207606  | 1.81199212  |
| H     | -4.42723800 | 5.41120700  | 0.18366000  | C | 2.90002183  | 3.58356197  | -0.16536029 |
| H     | -3.58777500 | 5.69890300  | -1.35354100 | H | 2.84211294  | 4.56426296  | 0.30129974  |
| H     | -2.70484500 | 5.80646900  | 0.17437800  | C | 3.47457665  | 3.47241354  | -1.42835836 |
| H     | -3.92906700 | 1.35443000  | 2.55306200  | C | 3.98847405  | 4.68892870  | -2.14946034 |
| H     | -3.97714700 | -0.11296000 | 1.57288100  | H | 4.67480421  | 4.41475297  | -2.95347734 |
| H     | -2.46014900 | 0.41538200  | 2.32675300  | H | 4.50796218  | 5.36530951  | -1.46602279 |
| C     | -4.32368200 | -1.55543500 | -1.50443800 | H | 3.15562316  | 5.24417402  | -2.59319190 |
| C     | -4.17170500 | -0.53937500 | -2.60944900 | C | 3.49704670  | 2.21566831  | -2.01931685 |
| H     | -4.42102600 | 0.46921300  | -2.26515400 | H | 3.91291041  | 2.10246922  | -3.01755791 |
| H     | -3.15456800 | -0.50794700 | -3.01278800 | C | 2.97979030  | 1.09046543  | -1.37940397 |
| H     | -4.83943100 | -0.78556000 | -3.43760700 | C | 2.98974157  | -0.21558221 | -2.13581972 |
| H     | -2.18311800 | 3.94307000  | -2.35132600 | H | 1.98973908  | -0.66386754 | -2.14928649 |
| H     | -1.37388000 | -0.83942000 | 0.86609200  | H | 3.68135017  | -0.94269526 | -1.69878528 |
| C     | 1.78766600  | -3.12167300 | 2.84801500  | H | 3.29144549  | -0.04653325 | -3.17101918 |
| C     | 1.18867500  | -3.97160100 | 1.95102800  | C | 3.42299207  | -1.33876727 | 0.91665920  |
| C     | 0.97347700  | -3.21564300 | 0.76613600  | C | 4.51056507  | -0.77178448 | 1.62700675  |
| C     | 1.43121700  | -1.91740800 | 0.96285500  | C | 4.52849442  | 0.63153229  | 2.18051790  |
| N     | 1.93976900  | -1.90039100 | 2.24841800  | H | 5.34391750  | 0.73720275  | 2.89843303  |
| H     | 2.12453000  | -3.28009200 | 3.86354100  | H | 3.60319186  | 0.89470279  | 2.69234709  |
| H     | 0.94465600  | -5.01085300 | 2.12289300  | H | 4.67765807  | 1.36629087  | 1.38378473  |
| H     | 0.59520300  | -3.60979300 | -0.16784100 | C | 5.67120999  | -1.52311365 | 1.80650880  |
| C     | 2.61048800  | -0.79339300 | 2.90223300  | H | 6.49540174  | -1.07773529 | 2.35900827  |
| H     | 3.63387600  | -1.07482400 | 3.16797700  | C | 5.81681839  | -2.80906462 | 1.29435637  |
| H     | 2.65694400  | 0.06340500  | 2.23220800  | C | 7.07751961  | -3.59821974 | 1.52633765  |
| H     | 2.07480100  | -0.49712000 | 3.80855800  | H | 7.04491354  | -4.09864480 | 2.49954820  |
|       |             |             |             | H | 7.95668942  | -2.94944279 | 1.51922455  |
| P6_TS |             |             |             | H | 7.20934920  | -4.36693024 | 0.76181615  |
| P     | 1.85892266  | -0.37483903 | 0.65201024  | C | 4.75351076  | -3.33905099 | 0.57539220  |
| C     | 1.11487389  | -0.22816987 | 2.33545181  | H | 4.84262698  | -4.33483876 | 0.14769114  |
| H     | 1.91449475  | -0.18860143 | 3.07949766  | C | 3.56396219  | -2.63447366 | 0.37921226  |
| H     | 0.53048081  | 0.68724508  | 2.40047402  | C | 2.48002866  | -3.32890647 | -0.39835576 |
| C     | 0.17921231  | -1.42379246 | 2.57455476  | H | 1.92954648  | -2.65887570 | -1.05973563 |
| H     | 0.61482452  | -2.32333592 | 2.11865309  | H | 1.74957073  | -3.77927199 | 0.27790470  |
| H     | 0.18044178  | -1.62754519 | 3.65161356  | H | 2.90100874  | -4.13317754 | -1.00600481 |
| C     | -1.27437861 | -1.18738788 | 2.12174425  | C | -1.35220242 | 0.88009409  | 0.36246573  |
| H     | -1.68502378 | -0.41834389 | 2.78650325  | C | -0.58071137 | 1.49182369  | -0.61811312 |
| H     | -1.82322613 | -2.09726773 | 2.37472143  | F | 0.11975358  | 0.75504941  | -1.50931833 |
| B     | -1.64629912 | -0.74614576 | 0.56638291  | C | -0.46093935 | 2.86731574  | -0.79851287 |
| C     | 2.43694862  | 1.21352052  | -0.08054125 | F | 0.31773142  | 3.35418494  | -1.76542417 |
| C     | 2.36737652  | 2.49159370  | 0.52036598  | C | -1.14021560 | 3.72231605  | 0.04896545  |
| C     | 1.70908080  | 2.79458170  | 1.84616931  | F | -1.03523938 | 5.04279515  | -0.08825685 |
| H     | 1.82030702  | 3.85605242  | 2.07512729  | C | -1.93812126 | 3.17700753  | 1.04861472  |
| H     | 2.13219043  | 2.23243931  | 2.68084405  | F | -2.63014195 | 3.98375357  | 1.85280942  |

|      |             |             |             |   |             |             |             |
|------|-------------|-------------|-------------|---|-------------|-------------|-------------|
| C    | -2.02263577 | 1.79873301  | 1.18078928  | H | 0.20326400  | 1.65366400  | 2.26898000  |
| F    | -2.88812586 | 1.35958836  | 2.10715402  | C | 2.22943800  | 3.77038900  | 0.80666800  |
| C    | -3.26347978 | -1.04651182 | 0.27529188  | H | 1.84097100  | 4.59947700  | 1.39287600  |
| C    | -3.83763873 | -2.28567128 | 0.57992836  | C | 2.97878500  | 4.04301200  | -0.33299600 |
| F    | -3.10960999 | -3.27759798 | 1.12285588  | C | 3.23601500  | 5.45646200  | -0.77289300 |
| C    | -5.16705924 | -2.61742360 | 0.34795201  | H | 4.18857500  | 5.54172700  | -1.30120600 |
| F    | -5.63152564 | -3.82313747 | 0.68092500  | H | 3.24385500  | 6.14404500  | 0.07585900  |
| C    | -6.01375291 | -1.69125637 | -0.23836969 | H | 2.44438900  | 5.77853600  | -1.45739000 |
| F    | -7.28994382 | -1.98933326 | -0.47398094 | C | 3.41361400  | 2.96472600  | -1.09915800 |
| C    | -5.49953965 | -0.45526703 | -0.58948455 | H | 3.96109400  | 3.15251400  | -2.01931700 |
| F    | -6.28421759 | 0.44806994  | -1.17983321 | C | 3.14571000  | 1.64509100  | -0.74370200 |
| C    | -4.16359615 | -0.16812289 | -0.33185546 | C | 3.60683100  | 0.56808300  | -1.69581100 |
| F    | -3.77454541 | 1.05061695  | -0.76388309 | H | 2.82513700  | -0.17245400 | -1.88590300 |
| C    | -1.00914476 | -3.01831193 | -2.37016056 | H | 4.49274600  | 0.04372300  | -1.32680600 |
| C    | -0.69784361 | -3.89149876 | -1.33952289 | H | 3.85668500  | 1.01925500  | -2.65753600 |
| C    | -0.62445370 | -3.10498434 | -0.18981789 | C | 3.55260900  | -1.40322600 | 0.65720100  |
| C    | -0.84392944 | -1.74129844 | -0.49996967 | C | 4.70740900  | -1.07968900 | 1.39934200  |
| N    | -1.10856774 | -1.76243778 | -1.89230077 | C | 4.79504000  | 0.15553300  | 2.26257300  |
| H    | -1.18314999 | -3.21872999 | -3.41966837 | H | 5.62041700  | 0.06335800  | 2.97137600  |
| H    | -0.54949940 | -4.95737813 | -1.42805753 | H | 3.88422000  | 0.33301900  | 2.84513000  |
| H    | -0.44802848 | -3.46878147 | 0.81235252  | H | 4.97028700  | 1.05082900  | 1.65651600  |
| C    | -1.70214209 | -0.70346865 | -2.70251834 | C | 5.81512700  | -1.91482900 | 1.30079500  |
| H    | -2.15941588 | 0.04313285  | -2.05691763 | H | 6.71043100  | -1.67024800 | 1.86772500  |
| H    | -0.95775207 | -0.21964866 | -3.33651802 | C | 5.80423900  | -3.05356900 | 0.49278100  |
| H    | -2.48486510 | -1.14185941 | -3.32438924 | C | 7.01672500  | -3.94114200 | 0.41593400  |
| H    | 0.53788310  | -1.17162973 | -0.14149363 | H | 7.19339500  | -4.43811500 | 1.37517400  |
|      |             |             |             | H | 7.91309700  | -3.36039700 | 0.18027600  |
| P6_P |             |             |             | H | 6.89792800  | -4.71310100 | -0.34702900 |
| P    | 2.08791700  | -0.35841300 | 0.84262300  | C | 4.64510300  | -3.35256500 | -0.21936400 |
| C    | 1.37647500  | -0.82761500 | 2.46365700  | H | 4.62347600  | -4.24115400 | -0.84463000 |
| H    | 2.19431900  | -1.33505800 | 2.98437700  | C | 3.50139000  | -2.55231000 | -0.15975000 |
| H    | 1.07738300  | 0.02647000  | 3.06231100  | C | 2.29753600  | -2.96029400 | -0.97929400 |
| C    | 0.19442600  | -1.77914700 | 2.22672100  | H | 2.05980500  | -2.22542900 | -1.75558000 |
| H    | 0.49073200  | -2.55458300 | 1.51341700  | H | 1.38828900  | -3.09705300 | -0.38316200 |
| H    | 0.05506100  | -2.29917800 | 3.18190100  | H | 2.49726900  | -3.90912300 | -1.48006400 |
| C    | -1.13413500 | -1.09885800 | 1.83000400  | C | -1.04714200 | 0.54571900  | -0.39924700 |
| H    | -1.18616200 | -0.15076200 | 2.37858200  | C | -0.14505400 | 0.67768600  | -1.45409500 |
| H    | -1.91332100 | -1.71020100 | 2.29941700  | F | 0.45366000  | -0.40973100 | -1.99751600 |
| B    | -1.68292400 | -0.86750100 | 0.26196700  | C | 0.29927900  | 1.88093100  | -1.99138300 |
| C    | 2.41472800  | 1.39185400  | 0.44394100  | F | 1.17479000  | 1.88564400  | -3.00217200 |
| C    | 1.92076000  | 2.47066100  | 1.21288300  | C | -0.10936500 | 3.06993500  | -1.41966200 |
| C    | 1.03186900  | 2.34717000  | 2.42745400  | F | 0.35142800  | 4.23966200  | -1.86520600 |
| H    | 0.58935100  | 3.31982100  | 2.65160500  | C | -0.96145700 | 3.01599000  | -0.32749300 |
| H    | 1.58884700  | 2.03124400  | 3.31621100  | F | -1.30596800 | 4.14649700  | 0.29526200  |

|       |             |             |             |   |             |             |             |
|-------|-------------|-------------|-------------|---|-------------|-------------|-------------|
| C     | -1.40419400 | 1.78641100  | 0.14183800  | C | 0.39783129  | 0.31132354  | -3.51114550 |
| F     | -2.18582100 | 1.84890400  | 1.23230000  | H | 0.47003014  | 0.74045962  | -4.51604667 |
| C     | -3.35757500 | -0.60673700 | 0.40367300  | H | 0.86356675  | -0.67359716 | -3.50449950 |
| C     | -4.03706600 | -0.20835000 | 1.56142200  | C | -3.51219333 | 0.70924113  | -0.46017430 |
| F     | -3.39759900 | 0.08828700  | 2.70731900  | C | -4.56304533 | 0.29179637  | -1.30652515 |
| C     | -5.41745800 | -0.06986600 | 1.66235500  | C | -5.70739333 | 1.08301710  | -1.40645155 |
| F     | -5.97376600 | 0.30941200  | 2.81865200  | H | -6.50768597 | 0.75585596  | -2.06623119 |
| C     | -6.22194400 | -0.31821600 | 0.56576800  | C | -5.85476005 | 2.27183771  | -0.69839287 |
| F     | -7.54699300 | -0.18578900 | 0.64378500  | C | -4.80321920 | 2.67624867  | 0.11826532  |
| C     | -5.61301600 | -0.69840000 | -0.61507100 | H | -4.88392894 | 3.61137350  | 0.66725104  |
| F     | -6.35427700 | -0.93562500 | -1.70282700 | C | -3.63686400 | 1.92375137  | 0.24918548  |
| C     | -4.22998100 | -0.82552100 | -0.66280000 | C | -4.51631857 | -0.96657922 | -2.13139097 |
| F     | -3.76225300 | -1.18278000 | -1.87031600 | H | -5.30148013 | -0.94847671 | -2.88959782 |
| C     | -1.14355200 | -3.89917100 | -2.12069100 | H | -4.65482847 | -1.86036270 | -1.51645332 |
| C     | -1.14164200 | -4.52275000 | -0.89834700 | H | -3.55979410 | -1.06475065 | -2.64633221 |
| C     | -1.31830600 | -3.49631900 | 0.06232200  | C | -7.11766190 | 3.08487587  | -0.80027106 |
| C     | -1.42243700 | -2.25941200 | -0.57365600 | H | -7.84608358 | 2.76092496  | -0.04961512 |
| N     | -1.32035200 | -2.55356500 | -1.93047800 | H | -7.58283263 | 2.97153111  | -1.78218277 |
| H     | -1.05229600 | -4.29665800 | -3.12261600 | H | -6.91950433 | 4.14586422  | -0.63210483 |
| H     | -1.02585500 | -5.58280700 | -0.71965800 | C | -2.53215846 | 2.47011044  | 1.11132828  |
| H     | -1.38260900 | -3.64345200 | 1.13169600  | H | -2.87826829 | 3.33720525  | 1.67714773  |
| C     | -1.51843200 | -1.70293500 | -3.09475900 | H | -1.68363677 | 2.78944926  | 0.49910135  |
| H     | -1.74570300 | -0.68545100 | -2.79318100 | H | -2.15003321 | 1.72701595  | 1.81515487  |
| H     | -0.62474400 | -1.70365600 | -3.72328200 | C | -2.58442533 | -2.02260579 | 0.17487394  |
| H     | -2.36598900 | -2.07444800 | -3.67609500 | C | -3.10766427 | -2.17332893 | 1.48309945  |
| H     | 1.18305300  | -0.85842400 | -0.09229900 | C | -3.54373070 | -3.42303881 | 1.91269686  |
|       |             |             |             | H | -3.94668718 | -3.52035043 | 2.91821945  |
| P7_TS |             |             |             | C | -3.46043949 | -4.55046303 | 1.09934598  |
| P     | -1.99795080 | -0.31599845 | -0.18938906 | C | -2.90976860 | -4.39491628 | -0.16696473 |
| B     | 1.50418169  | 0.22227330  | 0.07971570  | H | -2.81747289 | -5.26554849 | -0.81232326 |
| C     | -1.04723835 | 0.30629597  | -2.97339506 | C | -2.46299785 | -3.16118770 | -0.65041529 |
| H     | -1.76715282 | -0.27707019 | -3.55451948 | C | -3.14918384 | -1.03521147 | 2.47412515  |
| C     | -0.75753124 | -0.24616214 | -1.56129092 | H | -3.68399422 | -0.16108405 | 2.09025335  |
| H     | -0.39706722 | -1.26690403 | -1.66522309 | H | -2.13020502 | -0.71850886 | 2.73294784  |
| C     | 0.41421438  | 0.67338615  | -1.08300271 | H | -3.64421435 | -1.35394668 | 3.39333610  |
| H     | -0.08826106 | 1.50553097  | -0.56608086 | C | -3.96517339 | -5.88656291 | 1.57552734  |
| C     | 0.92371217  | 1.27632882  | -2.43076659 | H | -3.52946956 | -6.70500006 | 0.99854309  |
| H     | 1.99802228  | 1.47585896  | -2.45443716 | H | -5.05341730 | -5.94693239 | 1.47116197  |
| C     | 0.02960280  | 2.49348624  | -2.72103481 | H | -3.72856320 | -6.04452361 | 2.63085971  |
| H     | 0.35264651  | 3.01591684  | -3.62763181 | C | -1.84309697 | -3.18423671 | -2.02966715 |
| H     | 0.03203303  | 3.21591485  | -1.89823742 | H | -2.23999341 | -4.02909166 | -2.59651526 |
| C     | -1.36526448 | 1.82316596  | -2.92960680 | H | -0.75570293 | -3.31691427 | -1.97229869 |
| H     | -2.07364980 | 2.07639573  | -2.13597550 | H | -2.02684561 | -2.27929986 | -2.60544673 |
| H     | -1.82038723 | 2.13752091  | -3.87275150 | C | 2.73882429  | -0.82177421 | -0.26985096 |

|      |             |             |             |   |             |             |             |
|------|-------------|-------------|-------------|---|-------------|-------------|-------------|
| F    | 4.04153269  | 0.05970341  | 1.51139887  | C | 1.04624700  | 0.71556600  | -2.39193500 |
| C    | 3.88828789  | -0.83961181 | 0.51967589  | H | 2.12498100  | 0.87342500  | -2.37746400 |
| F    | 6.00021499  | -1.68883080 | 1.16513881  | C | 0.23668300  | 1.90841600  | -2.92495900 |
| C    | 4.92654817  | -1.74752704 | 0.37587857  | H | 0.66756900  | 2.29560700  | -3.85417100 |
| F    | 5.81925653  | -3.62160118 | -0.75042356 | H | 0.19679100  | 2.73433500  | -2.20708400 |
| C    | 4.83718323  | -2.73545889 | -0.59419278 | C | -1.16134900 | 1.26893200  | -3.18352100 |
| F    | 3.57300961  | -3.75277023 | -2.30284440 | H | -1.93982300 | 1.70081400  | -2.55178000 |
| C    | 3.70077029  | -2.79388054 | -1.38300636 | H | -1.47766100 | 1.41486100  | -4.22030700 |
| F    | 1.59125560  | -2.04348574 | -1.95978668 | C | 0.54565000  | -0.39057400 | -3.33696600 |
| C    | 2.69272183  | -1.85505288 | -1.19501571 | H | 0.70673000  | -0.14173400 | -4.39101700 |
| C    | 2.10591631  | 1.71466400  | 0.47929288  | H | 0.95113500  | -1.38129600 | -3.13373700 |
| F    | 4.05640844  | 1.53731048  | -0.87411115 | C | -3.39716800 | 1.00588300  | -0.65825400 |
| C    | 3.26096443  | 2.26457613  | -0.07448596 | C | -4.46647000 | 0.69776800  | -1.52452200 |
| F    | 4.79200550  | 4.03047761  | -0.43449508 | C | -5.44003100 | 1.66595500  | -1.76547300 |
| C    | 3.66804957  | 3.58002364  | 0.12295229  | H | -6.26156500 | 1.42228200  | -2.43419000 |
| F    | 3.27026826  | 5.69528793  | 1.09337117  | C | -5.38340500 | 2.92942200  | -1.18449600 |
| C    | 2.89504419  | 4.43332892  | 0.89440009  | C | -4.30242700 | 3.22225800  | -0.35484400 |
| F    | 0.94214828  | 4.74892662  | 2.18393244  | H | -4.22765800 | 4.21208700  | 0.08817200  |
| C    | 1.71926750  | 3.95086271  | 1.44769499  | C | -3.30136300 | 2.29353200  | -0.07589900 |
| F    | 0.18486134  | 2.24046968  | 1.75368123  | C | -4.58334100 | -0.62331400 | -2.23606200 |
| C    | 1.36181632  | 2.63074285  | 1.21363839  | H | -5.40600700 | -0.59583100 | -2.95317800 |
| C    | 0.68238491  | -1.79437205 | 3.24845540  | H | -4.76762100 | -1.44912300 | -1.54295600 |
| C    | 0.31857820  | -2.70826214 | 2.26780877  | H | -3.67158700 | -0.84530200 | -2.79875000 |
| C    | 0.35985189  | -2.00523127 | 1.07054104  | C | -6.45576100 | 3.95362900  | -1.43581100 |
| C    | 0.68465378  | -0.63392880 | 1.29576606  | H | -6.02566800 | 4.95046100  | -1.56228100 |
| N    | 0.91605758  | -0.59040236 | 2.69094791  | H | -7.14873100 | 4.00013200  | -0.58897600 |
| H    | 0.78950829  | -1.93190248 | 4.31629023  | H | -7.03617000 | 3.71095900  | -2.32866600 |
| H    | 0.05468222  | -3.74416166 | 2.41928138  | C | -2.16636400 | 2.73597800  | 0.81442100  |
| H    | 0.16592206  | -2.41838144 | 0.08881937  | H | -2.29073700 | 3.78741800  | 1.07955200  |
| C    | 1.47081409  | 0.50564170  | 3.47643931  | H | -1.19782600 | 2.63683700  | 0.31515100  |
| H    | 1.80585715  | 0.09694585  | 4.43005141  | H | -2.11690800 | 2.16623700  | 1.74657300  |
| H    | 2.33223319  | 0.92146347  | 2.95547888  | C | -2.99168000 | -1.74488700 | 0.43659800  |
| H    | 0.73091429  | 1.28405891  | 3.65482211  | C | -3.54264900 | -1.59659500 | 1.73214900  |
| H    | -0.69629325 | -0.23156391 | 0.95935985  | C | -4.18599800 | -2.68451500 | 2.31615800  |
|      |             |             |             | H | -4.60715500 | -2.56815000 | 3.31150000  |
| P7_P |             |             |             | C | -4.29030900 | -3.91534700 | 1.67130700  |
| P    | -2.15467100 | -0.26720400 | -0.23181200 | C | -3.71601100 | -4.04369200 | 0.41052400  |
| B    | 1.57865000  | -0.06675800 | 0.20375100  | H | -3.76785400 | -5.00119600 | -0.10217100 |
| C    | -0.93138100 | -0.23930200 | -2.92464200 | C | -3.05987500 | -2.98722400 | -0.22447400 |
| H    | -1.63286700 | -0.89174800 | -3.45095100 | C | -3.40462300 | -0.33327400 | 2.54338000  |
| C    | -0.77375600 | -0.55708500 | -1.41733400 | H | -3.77426800 | 0.54983600  | 2.01305900  |
| H    | -0.54395400 | -1.61484600 | -1.31272200 | H | -2.35360200 | -0.16539600 | 2.81260300  |
| C    | 0.45654600  | 0.32605800  | -0.99651900 | H | -3.97019800 | -0.41992800 | 3.47256000  |
| H    | 0.01108000  | 1.25066500  | -0.60775700 | C | -5.01443000 | -5.06536200 | 2.31564100  |

|       |             |             |             |   |             |             |             |
|-------|-------------|-------------|-------------|---|-------------|-------------|-------------|
| H     | -4.86821400 | -5.06581500 | 3.39867200  | C | -1.24937000 | -0.39959200 | -0.91321900 |
| H     | -4.66890200 | -6.02312600 | 1.91995300  | H | -1.26170500 | 0.32895200  | -1.72814300 |
| H     | -6.09139500 | -4.99632700 | 2.12804900  | H | -1.14296600 | -1.37142100 | -1.40538400 |
| C     | -2.42013200 | -3.28940800 | -1.55728200 | P | -2.86636400 | -0.47987700 | -0.05215600 |
| H     | -2.93323800 | -4.12764800 | -2.03355400 | B | 0.01586400  | -0.15239000 | 0.17423600  |
| H     | -1.37217800 | -3.58559300 | -1.42437500 | C | -3.68263300 | 1.21312500  | -0.08869000 |
| H     | -2.44232200 | -2.45239600 | -2.25431000 | C | -2.59090000 | 2.23513300  | 0.25698200  |
| C     | 2.87720500  | -0.95980400 | -0.31430900 | H | -1.85526200 | 2.33310200  | -0.54465300 |
| F     | 4.56030500  | 0.27270700  | 0.84794200  | H | -3.05964200 | 3.21394200  | 0.40937800  |
| C     | 4.20492400  | -0.76118600 | 0.05888400  | H | -2.05622600 | 1.97557400  | 1.17771000  |
| F     | 6.50297000  | -1.33112000 | 0.08821700  | C | -4.74992800 | 1.27049600  | 1.01496800  |
| C     | 5.25349500  | -1.59938900 | -0.30168500 | H | -5.17963400 | 2.27844100  | 1.04654500  |
| F     | 5.98843300  | -3.55269600 | -1.40942800 | H | -5.56730000 | 0.56576300  | 0.85057200  |
| C     | 4.99757200  | -2.73285200 | -1.05428600 | H | -4.30993900 | 1.05946100  | 1.99472300  |
| F     | 3.40798200  | -4.11557200 | -2.11169800 | C | -4.29029100 | 1.58985100  | -1.44242500 |
| C     | 3.68943500  | -3.00934600 | -1.41568800 | H | -5.16911000 | 0.98656000  | -1.68394700 |
| F     | 1.43017100  | -2.53329900 | -1.35633700 | H | -4.61054000 | 2.63825500  | -1.41207700 |
| C     | 2.68119600  | -2.14131400 | -1.02395600 | H | -3.56271500 | 1.48663600  | -2.25357000 |
| C     | 1.98894900  | 1.49158200  | 0.62755800  | C | -3.89548600 | -1.78293500 | -0.94419700 |
| F     | 3.71174100  | 1.77448000  | -0.99704700 | C | -3.26106900 | -3.13853700 | -0.59367000 |
| C     | 2.91063100  | 2.28993200  | -0.04657800 | H | -2.26556800 | -3.24556700 | -1.03405300 |
| F     | 3.97147600  | 4.35339100  | -0.52153100 | H | -3.18323000 | -3.28234900 | 0.48936500  |
| C     | 3.06024600  | 3.65685200  | 0.16264000  | H | -3.88385500 | -3.94226400 | -1.00226800 |
| F     | 2.35262200  | 5.62297600  | 1.26452500  | C | -5.33530600 | -1.77877100 | -0.41804300 |
| C     | 2.23735300  | 4.30914800  | 1.06536300  | H | -5.36837500 | -1.86403600 | 0.67316000  |
| F     | 0.43635200  | 4.17888400  | 2.58666500  | H | -5.87784400 | -0.87717900 | -0.71287800 |
| C     | 1.28064300  | 3.57204900  | 1.74477600  | H | -5.87294500 | -2.63608600 | -0.83905500 |
| F     | 0.18969600  | 1.58549300  | 2.18442500  | C | -3.89155800 | -1.62295300 | -2.46971100 |
| C     | 1.18335000  | 2.20801700  | 1.51110600  | H | -4.40062800 | -2.48329300 | -2.92101300 |
| C     | 0.77451700  | -1.86069900 | 3.50689200  | H | -4.41548600 | -0.72179700 | -2.79244200 |
| C     | -0.05931300 | -2.57681700 | 2.68599200  | H | -2.87435900 | -1.58976900 | -2.86918400 |
| C     | 0.09118800  | -2.01959400 | 1.38754400  | C | 1.40881100  | -0.96779600 | -0.17756600 |
| C     | 0.98735500  | -0.95755700 | 1.43682500  | C | 1.71937000  | -1.66977000 | -1.33638100 |
| N     | 1.40901300  | -0.90507400 | 2.75442500  | C | 2.43379500  | -0.92846300 | 0.76828300  |
| H     | 0.98504700  | -1.95113900 | 4.56341100  | C | 2.93494900  | -2.31563000 | -1.54067100 |
| H     | -0.68474800 | -3.41126500 | 2.97208900  | C | 3.65984900  | -1.56036500 | 0.61140700  |
| H     | -0.35517600 | -2.42059500 | 0.49071500  | C | 3.91263600  | -2.26238700 | -0.55975500 |
| C     | 2.39643700  | -0.01293700 | 3.33297400  | F | 0.82298200  | -1.80188700 | -2.32919000 |
| H     | 2.89045800  | -0.52750700 | 4.15989100  | F | 3.16538500  | -2.98671200 | -2.67016500 |
| H     | 3.15151600  | 0.24681700  | 2.59219000  | F | 4.59279200  | -1.49482800 | 1.56137600  |
| H     | 1.93836600  | 0.90421000  | 3.71614900  | F | 2.24805300  | -0.25919300 | 1.91698700  |
| H     | -1.50238500 | 0.26571800  | 0.87854300  | F | 5.07971000  | -2.87744000 | -0.73847600 |
|       |             |             |             | C | 0.53464900  | 1.41909900  | 0.05870900  |
| P8_TS |             |             |             | C | 0.74332300  | 2.39745100  | 1.02510200  |

|      |             |             |             |   |             |             |             |
|------|-------------|-------------|-------------|---|-------------|-------------|-------------|
| C    | 0.92150000  | 1.82520800  | -1.22535000 | H | -2.08996200 | -3.09497900 | 0.51903000  |
| C    | 1.22985800  | 3.67431800  | 0.75641700  | H | -3.04036300 | -2.34516700 | 1.80622900  |
| C    | 1.40951000  | 3.08404700  | -1.54403900 | H | -3.69013200 | -3.73652700 | 0.91007900  |
| C    | 1.56647600  | 4.02628800  | -0.53849400 | C | -5.22923000 | -1.64875500 | 0.20079400  |
| F    | 0.84300500  | 0.96530000  | -2.25685400 | H | -5.28777800 | -1.09234200 | 1.14202000  |
| F    | 1.74366900  | 3.38728500  | -2.79828400 | H | -5.79006700 | -1.10963000 | -0.56726200 |
| F    | 2.03488800  | 5.24054200  | -0.81504800 | H | -5.72714400 | -2.61200900 | 0.35461100  |
| F    | 1.37599300  | 4.55830500  | 1.74454900  | C | -3.75177000 | -2.61348400 | -1.58887000 |
| F    | 0.45097400  | 2.18235200  | 2.31810500  | H | -4.23764300 | -3.58950900 | -1.48226100 |
| C    | -0.36812000 | -2.33122100 | 3.29933300  | H | -4.29061800 | -2.05880000 | -2.35947000 |
| C    | -0.64760700 | -1.13446900 | 3.94907600  | H | -2.73211700 | -2.79213000 | -1.94189300 |
| C    | -0.72253300 | -0.16586700 | 2.95574500  | C | 1.58235500  | -0.88073400 | -0.26959600 |
| C    | -0.51133300 | -0.74910400 | 1.67291800  | C | 1.85270800  | -1.50425900 | -1.48045000 |
| N    | -0.28108100 | -2.12040900 | 1.97918000  | C | 2.69936800  | -0.70013100 | 0.54608100  |
| H    | -0.25472700 | -3.32850700 | 3.70497600  | C | 3.11516700  | -1.95038000 | -1.85537000 |
| H    | -0.79659100 | -1.00540900 | 5.01018900  | C | 3.97751100  | -1.12793700 | 0.21592000  |
| H    | -0.97737000 | 0.87036800  | 3.10679900  | C | 4.18749700  | -1.76258300 | -0.99990100 |
| C    | -0.04564800 | -3.20101700 | 1.03264000  | F | 0.86714700  | -1.75872500 | -2.36410000 |
| H    | -0.38557900 | -2.90005100 | 0.04403600  | F | 3.30056800  | -2.56183900 | -3.02906700 |
| H    | 1.01890800  | -3.44278100 | 0.97284700  | F | 5.00251400  | -0.93372100 | 1.04873200  |
| H    | -0.60724900 | -4.08275300 | 1.34941100  | F | 2.56599400  | -0.08978600 | 1.73326200  |
| H    | -1.81105600 | -0.74117000 | 1.37266700  | F | 5.40549900  | -2.18451500 | -1.33992600 |
|      |             |             |             | C | 0.39747200  | 1.31568600  | 0.33539200  |
| P8_P |             |             |             | C | 0.60656200  | 2.13650500  | 1.44357800  |
| C    | -1.10929700 | -0.69158500 | -0.80501600 | C | 0.60682900  | 1.97768000  | -0.87848300 |
| H    | -0.98867400 | -0.23546700 | -1.78970400 | C | 0.88255500  | 3.50000800  | 1.36009300  |
| H    | -1.08965500 | -1.77338000 | -0.96920200 | C | 0.88123800  | 3.32920500  | -1.01378500 |
| P    | -2.79051000 | -0.34138500 | -0.24903100 | C | 1.01487700  | 4.10745900  | 0.12488800  |
| B    | 0.12928500  | -0.32309100 | 0.28767900  | F | 0.53194400  | 1.30055200  | -2.04430900 |
| C    | -3.59930500 | 1.08813300  | -1.12417400 | F | 1.02258000  | 3.87953100  | -2.22283200 |
| C    | -2.53982200 | 2.18478800  | -1.29481300 | F | 1.27868000  | 5.40989500  | 0.03079100  |
| H    | -1.72852900 | 1.87584100  | -1.95746200 | F | 1.04349600  | 4.22183100  | 2.47167800  |
| H    | -3.02276500 | 3.06015600  | -1.74224400 | F | 0.57430100  | 1.65917800  | 2.69276100  |
| H    | -2.11279900 | 2.49289700  | -0.33484300 | C | -0.57480500 | -2.79029200 | 3.11909000  |
| C    | -4.73273700 | 1.64683300  | -0.25164600 | C | -1.15918000 | -1.69236300 | 3.70031600  |
| H    | -5.14485600 | 2.53164100  | -0.74869000 | C | -0.96981400 | -0.61478000 | 2.79723000  |
| H    | -5.55065500 | 0.93999300  | -0.10705900 | C | -0.25963600 | -1.05691800 | 1.68645000  |
| H    | -4.36655000 | 1.96064900  | 0.73091300  | N | -0.04495100 | -2.41193500 | 1.91272400  |
| C    | -4.12905800 | 0.66674800  | -2.49812300 | H | -0.48202800 | -3.81169000 | 3.46062600  |
| H    | -4.98452700 | -0.00931500 | -2.41667000 | H | -1.65088300 | -1.66501900 | 4.66262500  |
| H    | -4.46324700 | 1.56151500  | -3.03402500 | H | -1.28369900 | 0.40574700  | 2.96296600  |
| H    | -3.35614700 | 0.18573400  | -3.10682800 | C | 0.60030200  | -3.37228600 | 1.03502500  |
| C    | -3.78187600 | -1.91484000 | -0.22383100 | H | 0.25002500  | -3.26132100 | 0.00496900  |
| C    | -3.10298700 | -2.81603000 | 0.82013800  | H | 1.68884100  | -3.26916000 | 1.04290800  |



|       |             |             |             |      |             |             |             |
|-------|-------------|-------------|-------------|------|-------------|-------------|-------------|
| H     | 0.34059500  | -4.37654700 | 1.37559000  | H    | 1.94314800  | -3.43755800 | 0.71075100  |
| H     | -2.76674800 | 0.06287700  | 1.09451000  | H    | 1.35666600  | -3.19376900 | -0.95828300 |
|       |             |             |             | H    | 2.89873800  | -3.98772500 | -0.66154200 |
| P9_TS |             |             |             | H    | -3.32705400 | 1.41440800  | -0.78089700 |
| C     | 0.44161600  | -0.45494700 | -1.07458500 | H    | -5.38451300 | 0.66019700  | -1.88130600 |
| H     | 0.56207500  | 0.18722000  | -1.95061800 | H    | -5.57114700 | -1.66533400 | -2.74048600 |
| H     | 0.36090700  | -1.48075700 | -1.45156400 | H    | -3.65905200 | -3.22774300 | -2.44272200 |
| B     | -0.90875900 | -0.01717600 | -0.19033300 | H    | -1.61904800 | -2.48423700 | -1.30797000 |
| C     | -0.83190700 | 1.58537000  | 0.09507600  | H    | -0.37602100 | 1.54000900  | 2.19791700  |
| C     | -0.57953000 | 2.17761900  | 1.33995500  | H    | -0.34624900 | 3.97380000  | 2.50687500  |
| C     | -0.98240200 | 2.47357300  | -0.98622900 | H    | -0.67139200 | 5.48550200  | 0.56102200  |
| C     | -0.53741300 | 3.56042800  | 1.52016300  | H    | -1.04042000 | 4.50495000  | -1.69491000 |
| C     | -0.91816200 | 3.85570500  | -0.83239900 | H    | -1.17283500 | 2.06109300  | -1.97658500 |
| C     | -0.70937800 | 4.40820700  | 0.43169000  | C    | -0.83392000 | -0.91499700 | 1.23081400  |
| C     | -2.28212100 | -0.46182200 | -0.95915500 | C    | -0.50823300 | -2.28660600 | 1.33049500  |
| C     | -3.38383500 | 0.38758300  | -1.13591900 | C    | -1.10086000 | -2.86168300 | 2.45601200  |
| C     | -2.43167500 | -1.77134800 | -1.44406800 | C    | -1.85127400 | -1.85307900 | 3.03074500  |
| C     | -4.55603600 | -0.03329500 | -1.76554200 | N    | -1.70282600 | -0.70857400 | 2.32671500  |
| C     | -3.58946600 | -2.20600100 | -2.07949600 | H    | 0.12834800  | -2.79071000 | 0.62623000  |
| C     | -4.66326800 | -1.33287300 | -2.24606400 | H    | -1.01146500 | -3.87688600 | 2.81165300  |
| P     | 1.90488100  | -0.36837000 | 0.03738000  | H    | -2.50711200 | -1.88194200 | 3.89088600  |
| C     | 2.91730300  | 1.21787200  | -0.36167500 | C    | -2.64319100 | 0.39339200  | 2.52145300  |
| C     | 4.39346400  | 1.06279300  | 0.03360700  | H    | -2.89362400 | 0.82989700  | 1.55624300  |
| H     | 4.93848500  | 0.33792700  | -0.56982800 | H    | -3.55165400 | -0.01222900 | 2.96872100  |
| H     | 4.88040800  | 2.03269000  | -0.11316900 | H    | -2.23750300 | 1.17051800  | 3.17107500  |
| H     | 4.50246100  | 0.79952300  | 1.09020000  | H    | 0.63126100  | -0.59213200 | 1.27666200  |
| C     | 2.80706600  | 1.58872800  | -1.84723600 |      |             |             |             |
| H     | 3.09422800  | 0.77898800  | -2.52112400 | P9_P |             |             |             |
| H     | 1.78879600  | 1.90139800  | -2.09353400 | C    | 0.45104900  | -0.35635300 | -0.90605500 |
| H     | 3.46761100  | 2.44229100  | -2.04163500 | H    | 0.51147500  | 0.35581000  | -1.73704300 |
| C     | 2.38856500  | 2.40864800  | 0.44952200  | H    | 0.37470000  | -1.34784400 | -1.35936700 |
| H     | 1.43311300  | 2.76359200  | 0.07309900  | B    | -0.96943800 | 0.01152100  | -0.04478900 |
| H     | 2.28419900  | 2.17393500  | 1.51251900  | C    | -0.97979200 | 1.63944200  | 0.12707700  |
| H     | 3.10751500  | 3.23088300  | 0.35294900  | C    | -0.81428100 | 2.26643300  | 1.37176800  |
| C     | 3.02929500  | -1.87090900 | -0.36488900 | C    | -1.04465100 | 2.49502000  | -0.98973000 |
| C     | 4.14511400  | -2.03468800 | 0.68452500  | C    | -0.70327800 | 3.65232700  | 1.49903300  |
| H     | 4.61456800  | -3.01535400 | 0.54492700  | C    | -0.94753300 | 3.87987700  | -0.87975600 |
| H     | 4.93233000  | -1.28863300 | 0.61358500  | C    | -0.76710200 | 4.46717700  | 0.37248400  |
| H     | 3.73338000  | -2.00666200 | 1.69857400  | C    | -2.15853500 | -0.57391700 | -1.02411500 |
| C     | 3.60213300  | -1.76562500 | -1.78581400 | C    | -3.17849600 | 0.18653700  | -1.61349800 |
| H     | 4.27419000  | -0.91819200 | -1.92192600 | C    | -2.21068400 | -1.95865000 | -1.26370800 |
| H     | 4.17359600  | -2.67475600 | -2.00828200 | C    | -4.17552500 | -0.38736700 | -2.40414900 |
| H     | 2.79776000  | -1.68775800 | -2.52518200 | C    | -3.19625300 | -2.54867000 | -2.04956100 |
| C     | 2.23739200  | -3.18787900 | -0.31071700 | C    | -4.18736200 | -1.75959000 | -2.63148700 |

|   |             |             |             |        |             |             |             |
|---|-------------|-------------|-------------|--------|-------------|-------------|-------------|
| P | 2.05159500  | -0.31519000 | -0.08076800 | H      | -2.96984600 | -1.33713600 | 4.02910800  |
| C | 3.12251500  | 1.12614800  | -0.57948900 | C      | -3.49947800 | -0.02330400 | 1.71649200  |
| C | 4.47567400  | 1.05802600  | 0.13919200  | H      | -4.09859300 | 0.19858600  | 2.60248200  |
| H | 5.09982300  | 0.22765600  | -0.19830700 | H      | -3.29493500 | 0.91097900  | 1.19132000  |
| H | 5.02080300  | 1.98513200  | -0.06907300 | H      | -4.06852000 | -0.68115100 | 1.05308600  |
| H | 4.35200400  | 0.98721600  | 1.22488000  | H      | 1.87683600  | -0.06401000 | 1.28684300  |
| C | 3.31452100  | 1.20460400  | -2.09759000 |        |             |             |             |
| H | 3.89871700  | 0.37247600  | -2.49474700 | P10_TS |             |             |             |
| H | 2.35854100  | 1.24567600  | -2.62773400 | P      | 2.32575800  | -0.32616900 | 0.57761500  |
| H | 3.85469800  | 2.12922300  | -2.32760500 | B      | -1.85686000 | -0.19105200 | 0.57717200  |
| C | 2.38751900  | 2.38682800  | -0.09675800 | C      | 2.05180200  | -0.06353700 | 2.39067200  |
| H | 1.41795000  | 2.51759600  | -0.58207900 | H      | 1.93726500  | 1.02195200  | 2.46420400  |
| H | 2.22983800  | 2.37936800  | 0.98611500  | H      | 2.95682500  | -0.31729100 | 2.93748400  |
| H | 3.00860600  | 3.25543700  | -0.34160200 | C      | 0.82191900  | -0.76171200 | 3.01356400  |
| C | 2.90516900  | -1.98226900 | -0.15641500 | H      | 1.11369000  | -1.03260400 | 4.03421900  |
| C | 3.72505400  | -2.17367800 | 1.12711400  | H      | 0.62606700  | -1.71513900 | 2.51390600  |
| H | 4.24908800  | -3.13356500 | 1.06908500  | C      | -0.50229700 | 0.03496000  | 3.08321900  |
| H | 4.47678500  | -1.39359700 | 1.26957500  | H      | -0.84933300 | -0.04003900 | 4.12031800  |
| H | 3.08196800  | -2.19810500 | 2.01272200  | H      | -0.31314900 | 1.09931900  | 2.92431700  |
| C | 3.80384300  | -2.07832100 | -1.39636400 | C      | -1.66084100 | -0.46839100 | 2.19868200  |
| H | 4.66981600  | -1.41536500 | -1.34815700 | H      | -1.73299200 | -1.55797100 | 2.34853000  |
| H | 4.17860300  | -3.10506500 | -1.46724000 | H      | -2.56785000 | -0.07580300 | 2.66583000  |
| H | 3.24738700  | -1.86781100 | -2.31574200 | C      | 3.39172800  | 1.11938200  | 0.13919400  |
| C | 1.85986900  | -3.10888500 | -0.25807000 | C      | 4.64084700  | 1.32788700  | 0.77304700  |
| H | 1.06091400  | -3.03646300 | 0.48313600  | C      | 5.37584700  | 2.47044300  | 0.46562100  |
| H | 1.40599500  | -3.15029800 | -1.25152600 | H      | 6.33826300  | 2.61647700  | 0.95168900  |
| H | 2.38151800  | -4.05892100 | -0.09908500 | C      | 4.91895200  | 3.43091700  | -0.43542400 |
| H | -3.21671200 | 1.25828500  | -1.43427500 | C      | 3.70046500  | 3.20270100  | -1.05957800 |
| H | -4.94925000 | 0.24162800  | -2.83706400 | H      | 3.32595700  | 3.92543500  | -1.78133800 |
| H | -4.96230300 | -2.21111400 | -3.24418000 | C      | 2.93444900  | 2.06338800  | -0.80116200 |
| H | -3.19903500 | -3.62493500 | -2.20176100 | C      | 5.24146300  | 0.38470000  | 1.78977200  |
| H | -1.46295600 | -2.59890000 | -0.79423100 | H      | 4.88402100  | 0.61705200  | 2.79851100  |
| H | -0.76068200 | 1.64853400  | 2.26683500  | H      | 5.01603600  | -0.66099000 | 1.57529300  |
| H | -0.56697200 | 4.09684300  | 2.48161600  | H      | 6.32779800  | 0.49544500  | 1.80057200  |
| H | -0.68337400 | 5.54597900  | 0.46718300  | C      | 5.71813900  | 4.67760300  | -0.70661900 |
| H | -1.00304800 | 4.50190100  | -1.76940900 | H      | 5.55373200  | 5.41889400  | 0.08195200  |
| H | -1.16279700 | 2.05898100  | -1.98117900 | H      | 6.78902700  | 4.46127500  | -0.73638700 |
| C | -1.08592600 | -0.72639800 | 1.40673000  | H      | 5.43128900  | 5.13386900  | -1.65640800 |
| C | -0.21796000 | -1.46075600 | 2.21066500  | C      | 1.68064800  | 1.90957700  | -1.62490700 |
| C | -0.87462100 | -1.82453200 | 3.41788100  | H      | 1.94330500  | 1.68025000  | -2.66425000 |
| C | -2.13909500 | -1.30080100 | 3.33832000  | H      | 1.02848700  | 1.11926700  | -1.25950900 |
| N | -2.25859700 | -0.64440700 | 2.14140800  | H      | 1.12001700  | 2.84819900  | -1.62843500 |
| H | 0.80565200  | -1.71415900 | 1.97961700  | C      | 3.30683100  | -1.84955500 | 0.18788400  |
| H | -0.46708100 | -2.39134400 | 4.24336400  | C      | 3.63387800  | -2.88923700 | 1.09005100  |

|   |             |             |             |       |             |             |             |
|---|-------------|-------------|-------------|-------|-------------|-------------|-------------|
| C | 4.26058400  | -4.04016400 | 0.60451500  | C     | -0.71065600 | -0.99442800 | -0.30461800 |
| H | 4.49660100  | -4.83403700 | 1.30934300  | N     | -0.56854000 | -0.86083100 | -1.70077700 |
| C | 4.59542800  | -4.20919200 | -0.73302500 | H     | 0.24904300  | -2.00066500 | -3.28063300 |
| C | 4.28420900  | -3.17242200 | -1.60558200 | H     | 0.83137600  | -3.79786900 | -1.32447200 |
| H | 4.53383600  | -3.27217900 | -2.65948300 | H     | -0.15675900 | -2.73545800 | 0.94492300  |
| C | 3.65181600  | -2.00667600 | -1.17873300 | C     | -1.23481000 | 0.14448400  | -2.51522500 |
| C | 3.39842600  | -2.85395500 | 2.58289700  | H     | -2.31557300 | 0.08296400  | -2.35642900 |
| H | 3.65714300  | -3.82169100 | 3.01593500  | H     | -0.89733300 | 1.14933100  | -2.25990500 |
| H | 4.02984300  | -2.10517100 | 3.07187900  | H     | -1.01061600 | -0.05825500 | -3.56325900 |
| H | 2.36359700  | -2.64476300 | 2.84852000  |       |             |             |             |
| C | 5.29570500  | -5.45272800 | -1.21192600 | P10_P |             |             |             |
| H | 5.01518200  | -6.32133700 | -0.61170600 | P     | 2.79032600  | -0.36482600 | 0.55145700  |
| H | 5.05666500  | -5.66418600 | -2.25678200 | B     | -2.15972800 | -0.37535100 | 0.43996300  |
| H | 6.38208100  | -5.33693200 | -1.13844500 | C     | 2.00245500  | -0.09265700 | 2.18449600  |
| C | 3.36512400  | -0.96426100 | -2.23059300 | H     | 1.71379000  | 0.96095600  | 2.13364900  |
| H | 3.50681700  | -1.39103000 | -3.22594200 | H     | 2.73254100  | -0.18598500 | 2.98629300  |
| H | 2.33704200  | -0.59732400 | -2.16887700 | C     | 0.76551800  | -1.00156700 | 2.35983800  |
| H | 4.03042200  | -0.10103600 | -2.13185700 | H     | 0.97773100  | -1.75899500 | 3.12060500  |
| C | -1.87223100 | 1.43523200  | 0.20243200  | H     | 0.59000500  | -1.54764000 | 1.43370200  |
| C | -0.76949400 | 2.24605100  | 0.45011800  | C     | -0.54495400 | -0.27140000 | 2.72293400  |
| F | 0.37021700  | 1.71106400  | 0.94664700  | H     | -0.69142100 | -0.34708700 | 3.80733600  |
| C | -0.67970300 | 3.60267600  | 0.16935100  | H     | -0.44984500 | 0.80104900  | 2.52175200  |
| F | 0.45988700  | 4.26477500  | 0.39205600  | C     | -1.78341300 | -0.83556100 | 1.99698700  |
| C | -1.76418400 | 4.24677000  | -0.39993500 | H     | -1.72553400 | -1.93568100 | 2.02141500  |
| F | -1.71080500 | 5.54470700  | -0.68985700 | H     | -2.64151200 | -0.59104500 | 2.62714800  |
| C | -2.89518800 | 3.49901400  | -0.68705500 | C     | 3.60550100  | 1.16577800  | 0.01328900  |
| F | -3.94317000 | 4.08541800  | -1.26582300 | C     | 4.74753100  | 1.59870200  | 0.73364800  |
| C | -2.92082900 | 2.13698200  | -0.40300600 | C     | 5.33527000  | 2.80988800  | 0.39853900  |
| C | -3.34796500 | -0.87253700 | 0.25720100  | H     | 6.21384000  | 3.13650800  | 0.94987000  |
| C | -4.47172000 | -0.41121500 | 0.95119300  | C     | 4.82615700  | 3.61905300  | -0.62122900 |
| F | -4.37979000 | 0.69139500  | 1.71659200  | C     | 3.71386700  | 3.16996500  | -1.31725200 |
| C | -5.73282000 | -0.97893000 | 0.88123400  | H     | 3.30771200  | 3.78092400  | -2.12016400 |
| F | -6.75090100 | -0.47455100 | 1.58083100  | C     | 3.08444500  | 1.95068700  | -1.03484200 |
| C | -5.93877200 | -2.07865000 | 0.05881300  | C     | 5.35010000  | 0.79926000  | 1.86153500  |
| F | -7.14131000 | -2.64578200 | -0.02451800 | H     | 4.69743100  | 0.79147100  | 2.74091600  |
| C | -4.87603300 | -2.56128600 | -0.68009300 | H     | 5.55238100  | -0.23600600 | 1.57130300  |
| F | -5.04936400 | -3.60162800 | -1.49981200 | H     | 6.29754300  | 1.24339800  | 2.17185500  |
| C | -3.62572800 | -1.95339800 | -0.57285800 | C     | 5.47975700  | 4.93336100  | -0.94819500 |
| F | -2.68638500 | -2.49199700 | -1.37596200 | H     | 4.97689200  | 5.43290200  | -1.77871700 |
| F | -4.03182100 | 1.51620200  | -0.82721000 | H     | 5.45667500  | 5.60388400  | -0.08369900 |
| H | 0.62746100  | -0.61193500 | 0.09148500  | H     | 6.52995000  | 4.78883300  | -1.21968000 |
| C | 0.03967200  | -1.94318900 | -2.22001400 | C     | 1.92126700  | 1.60047800  | -1.93547600 |
| C | 0.31037600  | -2.85880000 | -1.21149200 | H     | 2.27081000  | 1.55325500  | -2.97221400 |
| C | -0.20113600 | -2.29831200 | -0.04360300 | H     | 1.41600900  | 0.66301800  | -1.71525500 |

|   |             |             |             |        |             |             |             |
|---|-------------|-------------|-------------|--------|-------------|-------------|-------------|
| H | 1.17474400  | 2.39833600  | -1.87997900 | C      | -0.13129600 | -1.43726600 | -2.63933600 |
| C | 3.82871900  | -1.84822900 | 0.32762200  | C      | 0.22977100  | -2.47105000 | -1.80755800 |
| C | 4.27167300  | -2.68000100 | 1.37946800  | C      | -0.42051600 | -2.23030200 | -0.56600700 |
| C | 5.02620600  | -3.80937000 | 1.05942800  | C      | -1.15494100 | -1.05396100 | -0.65056600 |
| H | 5.36587700  | -4.44887800 | 1.86986700  | N      | -0.95694800 | -0.59166900 | -1.93926600 |
| C | 5.35380300  | -4.14488200 | -0.25102400 | H      | 0.11182500  | -1.23660500 | -3.67410100 |
| C | 4.91306700  | -3.30519600 | -1.27043100 | H      | 0.86683300  | -3.30585800 | -2.06826800 |
| H | 5.16214200  | -3.54276000 | -2.30150900 | H      | -0.39727900 | -2.88623100 | 0.29388400  |
| C | 4.15725800  | -2.16344900 | -1.01457600 | C      | -1.68277800 | 0.48727500  | -2.58409900 |
| C | 3.99502500  | -2.43628800 | 2.84191200  | H      | -2.72543300 | 0.48392100  | -2.25746400 |
| H | 4.46022100  | -3.22288100 | 3.43809000  | H      | -1.24897200 | 1.46933500  | -2.36744400 |
| H | 4.40552400  | -1.48254300 | 3.18507000  | H      | -1.66178700 | 0.32524600  | -3.66340500 |
| H | 2.92562400  | -2.44995800 | 3.06145200  |        |             |             |             |
| C | 6.13891500  | -5.38935500 | -0.56037600 | P11_TS |             |             |             |
| H | 5.46288300  | -6.21917100 | -0.79224200 | P      | 1.78726200  | -0.62145000 | 0.04033200  |
| H | 6.78807000  | -5.24223500 | -1.42691600 | B      | -1.48267500 | -0.34811300 | 0.03401000  |
| H | 6.75587500  | -5.69126600 | 0.28896300  | C      | 0.76074400  | -0.80844500 | 1.59698500  |
| C | 3.72880100  | -1.32188300 | -2.19031300 | H      | 0.76390100  | 0.16193000  | 2.09039200  |
| H | 4.06431800  | -1.78491200 | -3.12000400 | C      | 1.35101200  | -1.84985100 | 2.56677100  |
| H | 2.63820200  | -1.23136500 | -2.24693200 | H      | 2.40498400  | -1.65086400 | 2.77960200  |
| H | 4.15674000  | -0.31546800 | -2.14711500 | H      | 1.31479300  | -2.83923600 | 2.08960200  |
| C | -2.07808800 | 1.28427300  | 0.29791300  | C      | 0.56242700  | -1.87942600 | 3.87780900  |
| C | -0.83177400 | 1.90574400  | 0.28793800  | H      | 0.70034800  | -0.91691100 | 4.39078200  |
| F | 0.29536800  | 1.15888700  | 0.38123700  | H      | 0.97315200  | -2.65119700 | 4.53813600  |
| C | -0.60730600 | 3.26665300  | 0.14397900  | C      | -0.92724200 | -2.10538500 | 3.63461200  |
| F | 0.64008200  | 3.75668000  | 0.12843300  | H      | -1.08547200 | -3.11802700 | 3.23862300  |
| C | -1.69157200 | 4.11346100  | -0.01513600 | H      | -1.47680900 | -2.04428900 | 4.58075900  |
| F | -1.51609000 | 5.42763700  | -0.15908500 | C      | -1.47236900 | -1.09193800 | 2.62924800  |
| C | -2.96058100 | 3.56088000  | -0.02937000 | H      | -2.54396700 | -1.25405600 | 2.48199700  |
| F | -4.02077600 | 4.35341600  | -0.20515000 | H      | -1.37372300 | -0.08231000 | 3.05044500  |
| C | -3.12663500 | 2.18588400  | 0.11306800  | C      | -0.72680700 | -1.15980000 | 1.28017400  |
| C | -3.71336100 | -0.93485100 | 0.17814600  | H      | -0.71875300 | -2.22242400 | 1.00770500  |
| C | -4.74514900 | -0.65064500 | 1.07727000  | C      | 3.23926200  | -1.78081200 | 0.11242700  |
| F | -4.55364100 | 0.23616600  | 2.07286500  | C      | 3.25692100  | -2.93071400 | -0.71017300 |
| C | -6.01778200 | -1.19512600 | 1.01830500  | C      | 4.37337400  | -3.76441000 | -0.71167700 |
| F | -6.94613000 | -0.87242900 | 1.92551100  | H      | 4.36730900  | -4.64258600 | -1.35367900 |
| C | -6.33237000 | -2.07821700 | -0.00355100 | C      | 5.49254200  | -3.50319800 | 0.07543100  |
| F | -7.54970200 | -2.62077100 | -0.07951900 | C      | 5.46268500  | -2.37227200 | 0.88203800  |
| C | -5.36589700 | -2.37412200 | -0.94477300 | H      | 6.32082500  | -2.14423000 | 1.51026100  |
| F | -5.65348200 | -3.20927800 | -1.95010800 | C      | 4.36835700  | -1.50331600 | 0.91514200  |
| C | -4.09936800 | -1.80070500 | -0.84413200 | C      | 2.10290000  | -3.31440700 | -1.59458500 |
| F | -3.26502900 | -2.14352900 | -1.84220900 | H      | 2.41286300  | -4.06494400 | -2.32545400 |
| F | -4.39875400 | 1.77518600  | -0.00497200 | H      | 1.29334800  | -3.75021400 | -1.00277000 |
| H | 1.70138600  | -0.58888400 | -0.29632800 | H      | 1.68984500  | -2.46180300 | -2.13798600 |

|   |             |             |             |       |             |             |             |
|---|-------------|-------------|-------------|-------|-------------|-------------|-------------|
| C | 6.68328300  | -4.42275000 | 0.04604800  | C     | -0.62409500 | 4.05647400  | 0.55049700  |
| H | 6.40199300  | -5.43535600 | 0.35157600  | F     | -0.37444200 | 5.35187700  | 0.73908400  |
| H | 7.09817200  | -4.49269000 | -0.96427100 | C     | -0.00639400 | 3.35895700  | -0.47101300 |
| H | 7.47325300  | -4.07337000 | 0.71429700  | F     | 0.85719200  | 3.97438200  | -1.28008700 |
| C | 4.49694900  | -0.30588400 | 1.82045000  | C     | -0.28383700 | 2.00496700  | -0.63556300 |
| H | 3.53803000  | 0.01793900  | 2.21989100  | F     | 0.34789400  | 1.42661900  | -1.67727300 |
| H | 5.14647800  | -0.54788600 | 2.66548200  | C     | -1.48412900 | -1.65100700 | -3.53127400 |
| H | 4.93577600  | 0.54632500  | 1.29083200  | C     | -1.21867100 | -2.83707800 | -2.86152300 |
| C | 2.59937000  | 1.02493400  | -0.19894600 | C     | -0.93606900 | -2.47183600 | -1.54784700 |
| C | 3.21115100  | 1.16089000  | -1.46836100 | C     | -0.97192200 | -1.05923300 | -1.40001300 |
| C | 3.93081300  | 2.31728600  | -1.77106500 | N     | -1.35692800 | -0.60992300 | -2.68862900 |
| H | 4.40136200  | 2.39693600  | -2.74817000 | H     | -1.76895900 | -1.48661700 | -4.56273800 |
| C | 4.04102800  | 3.37101100  | -0.87298700 | H     | -1.23270500 | -3.82928000 | -3.28802100 |
| C | 3.38147700  | 3.24876200  | 0.34680700  | H     | -0.71153200 | -3.15412100 | -0.74225800 |
| H | 3.42241400  | 4.07784200  | 1.04986900  | C     | -1.79271200 | 0.72356700  | -3.09320300 |
| C | 2.65683300  | 2.11100100  | 0.70815600  | H     | -2.19910500 | 1.26032000  | -2.23785700 |
| C | 3.08310000  | 0.11970300  | -2.55452400 | H     | -0.97466100 | 1.29713300  | -3.53011700 |
| H | 3.48741000  | 0.50669500  | -3.49212700 | H     | -2.58891400 | 0.61287400  | -3.83092300 |
| H | 3.62260100  | -0.80252500 | -2.31667600 | H     | 0.43240000  | -0.89718700 | -1.04039000 |
| H | 2.03173100  | -0.13951200 | -2.72608300 |       |             |             |             |
| C | 4.79414000  | 4.62762400  | -1.21590900 | P11_p |             |             |             |
| H | 5.40519100  | 4.49360300  | -2.11142900 | P     | -1.90913500 | -0.61322800 | -0.16725200 |
| H | 4.09917100  | 5.45289400  | -1.40341900 | B     | 1.58442700  | -0.56327200 | 0.20499100  |
| H | 5.44939100  | 4.93294800  | -0.39506600 | C     | -0.63923200 | -1.03794700 | -1.44979800 |
| C | 1.96341500  | 2.18129800  | 2.04972600  | H     | -0.46480700 | -0.09378000 | -1.96855200 |
| H | 0.87815400  | 2.09898900  | 1.94849500  | C     | -1.30908700 | -2.01819600 | -2.43701700 |
| H | 2.28822500  | 1.40919300  | 2.75276300  | H     | -2.30729400 | -1.66445300 | -2.72674200 |
| H | 2.17095900  | 3.14653200  | 2.51664400  | H     | -1.46156000 | -2.98209200 | -1.93248700 |
| C | -3.12368100 | -0.62007700 | 0.00481900  | C     | -0.44339800 | -2.21775700 | -3.67433500 |
| C | -4.09316200 | 0.31022400  | -0.36459100 | H     | -0.35873400 | -1.26325900 | -4.21303100 |
| F | -3.76462300 | 1.58907000  | -0.64168700 | H     | -0.92413800 | -2.92991200 | -4.35329800 |
| C | -5.44850500 | 0.02824100  | -0.49352800 | C     | 0.94009000  | -2.69377400 | -3.25698900 |
| F | -6.30751300 | 0.98478900  | -0.85619000 | H     | 0.85492700  | -3.69032000 | -2.80223100 |
| C | -5.90699200 | -1.25345700 | -0.24756400 | H     | 1.58958400  | -2.79959900 | -4.13283800 |
| F | -7.20129800 | -1.54931600 | -0.36879700 | C     | 1.57973900  | -1.73579100 | -2.25159000 |
| C | -4.99223100 | -2.22464500 | 0.12427200  | H     | 2.55965600  | -2.13389200 | -1.99920500 |
| F | -5.40754500 | -3.47056800 | 0.36775100  | H     | 1.75005600  | -0.76356200 | -2.73204200 |
| C | -3.64941200 | -1.89266300 | 0.23738100  | C     | 0.76610400  | -1.51543700 | -0.94958300 |
| F | -2.84666300 | -2.90946500 | 0.60606600  | H     | 0.62849500  | -2.51232200 | -0.50729900 |
| C | -1.15179200 | 1.26953700  | 0.16285200  | C     | -3.31113400 | -1.79195000 | -0.07597600 |
| C | -1.76321400 | 2.03619600  | 1.16028900  | C     | -3.14085900 | -2.93854000 | 0.73004800  |
| F | -2.69766100 | 1.48482500  | 1.95185700  | C     | -4.20568600 | -3.82163000 | 0.89778100  |
| C | -1.52570800 | 3.38644000  | 1.36747400  | H     | -4.05731300 | -4.70273200 | 1.51695400  |
| F | -2.16351600 | 4.05269800  | 2.33219600  | C     | -5.43545000 | -3.61212800 | 0.28138100  |

|   |             |             |             |        |             |             |             |
|---|-------------|-------------|-------------|--------|-------------|-------------|-------------|
| C | -5.57278400 | -2.49378800 | -0.53730800 | C      | 4.01034800  | -1.51493800 | -0.25650300 |
| H | -6.51684200 | -2.32911800 | -1.05142700 | F      | 3.46277300  | -2.73509900 | -0.11624800 |
| C | -4.54347600 | -1.57285600 | -0.73349600 | C      | 0.85004100  | 0.93438500  | 0.33713300  |
| C | -1.82573500 | -3.26377200 | 1.37776300  | C      | 0.78965400  | 1.79445400  | -0.75903000 |
| H | -1.84419400 | -4.26618200 | 1.80959400  | F      | 1.30475900  | 1.39699600  | -1.94071900 |
| H | -1.01826400 | -3.23724900 | 0.64176700  | C      | 0.24722800  | 3.06798400  | -0.74289300 |
| H | -1.55642000 | -2.56579400 | 2.17807800  | F      | 0.18514200  | 3.80133100  | -1.85917600 |
| C | -6.58446700 | -4.56042200 | 0.48503900  | C      | -0.29991300 | 3.55818400  | 0.43306000  |
| H | -7.29528000 | -4.15286300 | 1.21172100  | F      | -0.86559400 | 4.76473700  | 0.46441400  |
| H | -7.12925000 | -4.72533500 | -0.44823700 | C      | -0.28944200 | 2.75099900  | 1.55444900  |
| H | -6.24066400 | -5.52667300 | 0.86017000  | F      | -0.87475300 | 3.16663400  | 2.68157200  |
| C | -4.83238400 | -0.41815100 | -1.65995600 | C      | 0.26544900  | 1.47644600  | 1.48140100  |
| H | -4.00865000 | -0.22138000 | -2.34839300 | F      | 0.16597500  | 0.77058500  | 2.62490200  |
| H | -5.71208100 | -0.64898000 | -2.26405600 | C      | 2.39771300  | -1.71335000 | 3.76492600  |
| H | -5.03576400 | 0.50617500  | -1.11131900 | C      | 1.75109600  | -2.85299800 | 3.35717200  |
| C | -2.56343600 | 1.08546600  | -0.20529800 | C      | 1.31339500  | -2.60899300 | 2.02823200  |
| C | -3.09263600 | 1.55380000  | 1.02220900  | C      | 1.68228000  | -1.32680100 | 1.64589100  |
| C | -3.59964600 | 2.84984500  | 1.08513700  | N      | 2.36299700  | -0.80908000 | 2.73809000  |
| H | -3.98865300 | 3.21111700  | 2.03343700  | H      | 2.88300100  | -1.46275300 | 4.69844600  |
| C | -3.60872800 | 3.69369400  | -0.02350600 | H      | 1.61873300  | -3.75578100 | 3.93732400  |
| C | -3.10536800 | 3.20125400  | -1.22452400 | H      | 0.84200000  | -3.34079000 | 1.39072100  |
| H | -3.11086900 | 3.84142000  | -2.10336900 | C      | 3.01240200  | 0.48271500  | 2.84739800  |
| C | -2.58129800 | 1.91330600  | -1.34884500 | H      | 2.76482000  | 1.11124200  | 1.99488300  |
| C | -3.09637800 | 0.73296000  | 2.28980700  | H      | 2.68416300  | 0.99219700  | 3.75794700  |
| H | -3.67182700 | 1.24636100  | 3.06180300  | H      | 4.10095500  | 0.36568000  | 2.87926200  |
| H | -3.54491000 | -0.25544800 | 2.14732400  | H      | -1.27434500 | -0.72627000 | 1.07465500  |
| H | -2.08257200 | 0.59416200  | 2.68028900  |        |             |             |             |
| C | -4.09931400 | 5.10983000  | 0.08585800  | P12_TS |             |             |             |
| H | -4.50303500 | 5.46732200  | -0.86424800 | P      | 2.26681100  | -0.85094700 | -0.54319900 |
| H | -4.87094900 | 5.20776700  | 0.85294200  | C      | 1.81035500  | -1.01822100 | -2.31667600 |
| H | -3.26672800 | 5.76516200  | 0.36210200  | H      | 2.67061700  | -0.72740400 | -2.93128300 |
| C | -2.06874100 | 1.54305000  | -2.72233900 | H      | 1.66477400  | -2.09443500 | -2.47342000 |
| H | -1.00799200 | 1.79585600  | -2.83128000 | C      | 0.53664700  | -0.26175300 | -2.72659000 |
| H | -2.18752000 | 0.48837100  | -2.97361600 | H      | 0.66043800  | 0.81122300  | -2.54766500 |
| H | -2.61194900 | 2.11782600  | -3.47572500 | H      | 0.45502200  | -0.37397300 | -3.81494400 |
| C | 3.20443700  | -0.37149400 | -0.20658100 | C      | -0.76324700 | -0.75350800 | -2.07505700 |
| C | 3.93131900  | 0.80500000  | -0.37004800 | H      | -0.84920700 | -1.82941600 | -2.26323500 |
| F | 3.34792400  | 2.01701800  | -0.27057500 | H      | -1.57909000 | -0.30962800 | -2.65661400 |
| C | 5.30585300  | 0.86225500  | -0.58537500 | B      | -1.09056000 | -0.42677800 | -0.47924100 |
| F | 5.91987400  | 2.04208300  | -0.72344400 | C      | 3.56335000  | -2.09943800 | -0.25730800 |
| C | 6.04119900  | -0.30613000 | -0.64271300 | C      | 3.33617300  | -3.12042700 | 0.66937200  |
| F | 7.35859700  | -0.27512900 | -0.85018300 | H      | 2.39859900  | -3.15527700 | 1.21889000  |
| C | 5.37972800  | -1.51230400 | -0.47402600 | C      | 4.31009100  | -4.09384000 | 0.88587600  |
| F | 6.06565800  | -2.65811700 | -0.52549400 | H      | 4.13174700  | -4.88427700 | 1.60775200  |

|   |             |             |             |       |             |             |             |
|---|-------------|-------------|-------------|-------|-------------|-------------|-------------|
| C | 5.50930100  | -4.04781500 | 0.18196000  | H     | 0.00083400  | -3.30387800 | -0.92022300 |
| H | 6.26730000  | -4.80599700 | 0.35138500  | H     | -0.27135000 | -4.94723400 | 1.19751900  |
| C | 5.74277600  | -3.02647200 | -0.73916800 | H     | -1.04563500 | -3.34824600 | 3.26462000  |
| H | 6.68138600  | -2.98730300 | -1.28258000 | C     | -1.43506500 | -0.75640800 | 2.70452900  |
| C | 4.77502500  | -2.05303000 | -0.95707600 | H     | -2.39787000 | -1.08869500 | 3.09986300  |
| H | 4.96383100  | -1.24776300 | -1.66282500 | H     | -0.75333900 | -0.54558400 | 3.53049100  |
| C | 3.11245500  | 0.75060400  | -0.35488800 | H     | -1.59488900 | 0.15489100  | 2.13401100  |
| C | 3.07561200  | 1.73688000  | -1.34572500 | H     | 0.78445900  | -1.31228300 | 0.26238200  |
| H | 2.61277900  | 1.54066300  | -2.30705200 |       |             |             |             |
| C | 3.62986600  | 2.99152500  | -1.10117700 | P12-P |             |             |             |
| H | 3.58473500  | 3.75634000  | -1.87037200 | P     | 2.46962200  | -0.76194200 | -0.63047500 |
| C | 4.23213300  | 3.26550600  | 0.12338800  | C     | 1.76154900  | -1.06688400 | -2.27294900 |
| H | 4.65389100  | 4.24722700  | 0.31358800  | H     | 2.57008100  | -0.81844900 | -2.97234900 |
| C | 4.29633900  | 2.27535500  | 1.10264100  | H     | 1.63092300  | -2.15395500 | -2.32247600 |
| H | 4.76780500  | 2.48301700  | 2.05778900  | C     | 0.45183600  | -0.35095700 | -2.64594700 |
| C | 3.73380500  | 1.02612900  | 0.86993400  | H     | 0.54952000  | 0.72547900  | -2.47850200 |
| H | 3.76599900  | 0.26523700  | 1.64612400  | H     | 0.37152400  | -0.47392200 | -3.73298700 |
| C | -0.42879400 | 1.04266600  | -0.06136700 | C     | -0.82683100 | -0.88669000 | -1.98896900 |
| C | -0.72679700 | 2.14850300  | -0.86165100 | H     | -0.86354200 | -1.96937800 | -2.15820700 |
| F | -1.55168900 | 2.00060800  | -1.91217700 | H     | -1.64722400 | -0.48099300 | -2.59233500 |
| C | -0.23833900 | 3.42881900  | -0.65675900 | B     | -1.18802700 | -0.57280400 | -0.39134400 |
| F | -0.55935300 | 4.42523000  | -1.48597800 | C     | 3.79625000  | -1.93947200 | -0.32748800 |
| C | 0.58781800  | 3.67583200  | 0.43090200  | C     | 3.58496900  | -2.98022400 | 0.58097400  |
| F | 1.07936200  | 4.89493100  | 0.64778400  | H     | 2.63750600  | -3.06310000 | 1.10888800  |
| C | 0.89536100  | 2.63101600  | 1.28012000  | C     | 4.59562700  | -3.91462600 | 0.79192700  |
| F | 1.67921700  | 2.83956100  | 2.34119700  | H     | 4.43943700  | -4.72306100 | 1.49816500  |
| C | 0.40739300  | 1.35659200  | 1.00647600  | C     | 5.80023200  | -3.80782700 | 0.10285600  |
| F | 0.84867100  | 0.40520100  | 1.85981500  | H     | 6.58433800  | -4.53925700 | 0.27007100  |
| C | -2.73741200 | -0.40891200 | -0.28719200 | C     | 6.00815500  | -2.76535300 | -0.80034100 |
| C | -3.49543200 | -1.48110100 | -0.76137400 | H     | 6.95143200  | -2.68304500 | -1.32988500 |
| F | -2.89649700 | -2.52621800 | -1.35864800 | C     | 5.00865500  | -1.82459100 | -1.01662500 |
| C | -4.87612600 | -1.57117300 | -0.65492900 | H     | 5.17484800  | -1.00128900 | -1.70744100 |
| F | -5.52954500 | -2.63278800 | -1.13465500 | C     | 3.12249500  | 0.91168000  | -0.48029300 |
| C | -5.58094600 | -0.54658900 | -0.04285100 | C     | 2.96454600  | 1.85430500  | -1.49972400 |
| F | -6.90734000 | -0.61173200 | 0.07301900  | H     | 2.48850500  | 1.58578400  | -2.43709100 |
| C | -4.88223900 | 0.53744800  | 0.45797000  | C     | 3.42015100  | 3.15632900  | -1.30550500 |
| F | -5.54024700 | 1.52895100  | 1.06508800  | H     | 3.28869000  | 3.89388900  | -2.09014200 |
| C | -3.49814900 | 0.58246400  | 0.32739400  | C     | 4.02613500  | 3.51228100  | -0.10407400 |
| F | -2.91592200 | 1.66396200  | 0.88426600  | H     | 4.36291000  | 4.53236200  | 0.04931900  |
| C | -0.55157100 | -1.68179300 | 0.47972300  | C     | 4.19650300  | 2.56600900  | 0.90625600  |
| C | -0.30673100 | -3.02164500 | 0.07892200  | H     | 4.66414000  | 2.84593000  | 1.84404900  |
| C | -0.43146100 | -3.87945900 | 1.17046000  | C     | 3.74811500  | 1.26433600  | 0.72201200  |
| C | -0.81282700 | -3.07855400 | 2.24215000  | H     | 3.86399200  | 0.53177200  | 1.51709200  |
| N | -0.88832800 | -1.79766700 | 1.84291400  | C     | -0.48200100 | 0.87140600  | 0.06309900  |

|        |             |             |             |   |             |             |             |
|--------|-------------|-------------|-------------|---|-------------|-------------|-------------|
| C      | -0.69279900 | 2.00268000  | -0.72942200 | C | -0.07269900 | 0.06436600  | 2.95094300  |
| F      | -1.48319900 | 1.91090800  | -1.81311600 | H | 0.14149100  | -0.13280900 | 4.00811600  |
| C      | -0.14254300 | 3.25102700  | -0.48976300 | H | 0.00625600  | 1.15438100  | 2.83660400  |
| F      | -0.36521000 | 4.27386100  | -1.31985300 | C | 1.01072600  | -0.65343100 | 2.12322200  |
| C      | 0.65710400  | 3.43712700  | 0.62980400  | H | 0.86375600  | -1.73097000 | 2.25808400  |
| F      | 1.21921500  | 4.62142600  | 0.87309200  | H | 1.96504100  | -0.44433500 | 2.62448300  |
| C      | 0.87757700  | 2.36600200  | 1.47292000  | C | -3.82771700 | 0.74762300  | -0.79077700 |
| F      | 1.66159500  | 2.50975500  | 2.54624600  | C | -4.81759000 | 0.20834700  | -1.61995200 |
| C      | 0.32333600  | 1.12509300  | 1.16840900  | H | -4.95379000 | -0.86773500 | -1.67792900 |
| F      | 0.67946900  | 0.13896700  | 2.02285500  | C | -5.64360800 | 1.04722900  | -2.36092100 |
| C      | -2.84532200 | -0.43436800 | -0.29209600 | H | -6.41195200 | 0.61869000  | -2.99660000 |
| C      | -3.63825500 | -1.46085000 | -0.80769900 | C | -5.48829900 | 2.42929200  | -2.28549100 |
| F      | -3.06696800 | -2.53686300 | -1.37528100 | H | -6.13384600 | 3.08168700  | -2.86478300 |
| C      | -5.02575800 | -1.47006000 | -0.77601000 | C | -4.50251800 | 2.97069400  | -1.46493900 |
| F      | -5.71596900 | -2.49214000 | -1.29121000 | H | -4.37226800 | 4.04640900  | -1.40117700 |
| C      | -5.70145100 | -0.40530900 | -0.20075700 | C | -3.67350400 | 2.13699200  | -0.72081500 |
| F      | -7.03530800 | -0.38987800 | -0.16038800 | H | -2.90766400 | 2.57975800  | -0.09386600 |
| C      | -4.96813200 | 0.63598900  | 0.33892100  | C | -3.74297400 | -1.78666100 | 0.62581600  |
| F      | -5.59828700 | 1.66785400  | 0.91013600  | C | -4.50219700 | -1.80017200 | 1.80126300  |
| C      | -3.57874600 | 0.59832300  | 0.28415600  | H | -4.48637500 | -0.94837600 | 2.47486300  |
| F      | -2.96650600 | 1.64257000  | 0.88018400  | C | -5.28064900 | -2.90892200 | 2.11810900  |
| C      | -0.76626200 | -1.82964000 | 0.55027300  | H | -5.86387400 | -2.91344600 | 3.03319700  |
| C      | -0.07811100 | -2.99512100 | 0.22780500  | C | -5.31282800 | -4.00879900 | 1.26311800  |
| C      | 0.00558100  | -3.82335500 | 1.38113800  | H | -5.92007500 | -4.87262700 | 1.51426700  |
| C      | -0.64140500 | -3.14719000 | 2.38836400  | C | -4.56075000 | -4.00284700 | 0.09172600  |
| N      | -1.10158800 | -1.96154800 | 1.88320700  | H | -4.57917200 | -4.86032100 | -0.57318600 |
| H      | 0.29723200  | -3.24176700 | -0.75776500 | C | -3.77148300 | -2.89919300 | -0.22204100 |
| H      | 0.46767600  | -4.79798900 | 1.46202200  | H | -3.16573100 | -2.90070700 | -1.12443500 |
| H      | -0.82513700 | -3.41297800 | 3.42032700  | C | 1.14114500  | 1.35501000  | 0.42692800  |
| C      | -1.89329300 | -1.02999300 | 2.66360400  | C | 0.12976900  | 2.09359100  | -0.16568400 |
| H      | -2.95026500 | -1.31682700 | 2.66283200  | F | -0.83048500 | 1.48149200  | -0.89987800 |
| H      | -1.52823100 | -1.01796300 | 3.69313200  | C | -0.01031100 | 3.47510200  | -0.06833200 |
| H      | -1.80859800 | -0.02350300 | 2.25558700  | F | -1.04368400 | 4.09444700  | -0.65299300 |
| H      | 1.52020400  | -1.01236400 | 0.36596700  | C | 0.91476600  | 4.19955800  | 0.65874600  |
| P13-TS |             |             |             | F | 0.80358600  | 5.52184200  | 0.77924900  |
| P      | -2.71492000 | -0.35563300 | 0.15030100  | C | 1.96842200  | 3.52103500  | 1.25756200  |
| B      | 1.25642300  | -0.29108800 | 0.52736200  | F | 2.87867100  | 4.20271000  | 1.95561400  |
| C      | -2.33445100 | 0.51950100  | 1.71462700  | C | 2.05473700  | 2.14341700  | 1.13185800  |
| H      | -1.74966800 | 1.40384200  | 1.44334700  | F | 3.10896700  | 1.56939500  | 1.73312500  |
| H      | -3.26585400 | 0.89175500  | 2.15303500  | C | 2.77354100  | -0.80148400 | 0.06821000  |
| C      | -1.53462100 | -0.36085400 | 2.70655900  | C | 3.68957800  | -0.07053900 | -0.68481600 |
| H      | -2.07178800 | -0.33627600 | 3.65963500  | F | 3.40564500  | 1.18061700  | -1.10383000 |
| H      | -1.55124500 | -1.41476900 | 2.39676000  | C | 4.93523100  | -0.54193300 | -1.08189800 |
|        |             |             |             | F | 5.75743900  | 0.22880100  | -1.79982400 |



|       |             |             |             |   |             |             |             |
|-------|-------------|-------------|-------------|---|-------------|-------------|-------------|
| C     | 5.32566000  | -1.82137600 | -0.72708300 | C | 4.53487100  | 1.58618600  | 0.48143300  |
| F     | 6.51574700  | -2.29662000 | -1.09611900 | H | 4.68429200  | 1.84816800  | -0.56235700 |
| C     | 4.45234600  | -2.60264500 | 0.01153400  | C | 3.76720600  | -1.84898000 | -0.85795000 |
| F     | 4.80285100  | -3.84499700 | 0.35707900  | C | 5.15939500  | -1.75829200 | -0.95275700 |
| C     | 3.21925500  | -2.08553400 | 0.38530000  | H | 5.66872400  | -0.83000600 | -0.70754100 |
| F     | 2.44033700  | -2.92932300 | 1.08650100  | C | 5.89436200  | -2.87131600 | -1.34494100 |
| C     | 0.26198000  | -1.17912900 | -0.45494400 | H | 6.97488900  | -2.80564100 | -1.41706500 |
| C     | -0.14138700 | -2.51894300 | -0.18736600 | C | 5.24448500  | -4.06981800 | -1.63483100 |
| C     | -0.45561900 | -3.16784200 | -1.37818800 | H | 5.82276900  | -4.93806200 | -1.93402100 |
| C     | -0.18730000 | -2.25525700 | -2.39598100 | C | 3.85886000  | -4.16200200 | -1.53360800 |
| N     | 0.26927100  | -1.11029400 | -1.86410200 | H | 3.35453800  | -5.09746600 | -1.75105500 |
| H     | -0.26121400 | -2.91823600 | 0.81111800  | C | 3.11471400  | -3.05243300 | -1.14393100 |
| H     | -0.83565100 | -4.17089800 | -1.50667100 | H | 2.03422400  | -3.12289900 | -1.05596100 |
| H     | -0.28577100 | -2.36283600 | -3.46889600 | C | -1.02559900 | 1.29870200  | -0.39817900 |
| C     | 0.71874000  | 0.01269900  | -2.67555800 | C | 0.02838000  | 2.04064000  | 0.11222500  |
| H     | 1.23628600  | -0.37581300 | -3.55434400 | F | 0.98433400  | 1.44881300  | 0.86995000  |
| H     | -0.12467400 | 0.62971100  | -2.99023700 | C | 0.23500700  | 3.39706700  | -0.11881500 |
| H     | 1.41617100  | 0.62088700  | -2.10143700 | F | 1.29567600  | 4.02050200  | 0.40616900  |
| H     | -1.09559600 | -0.84360600 | -0.23729900 | C | -0.65721000 | 4.08834000  | -0.91806900 |
| P13_P |             |             |             | F | -0.48871500 | 5.38854400  | -1.16184800 |
| P     | 2.78377900  | -0.40984800 | -0.39035700 | C | -1.72422100 | 3.39836500  | -1.47709700 |
| B     | -1.18283900 | -0.34036200 | -0.26728300 | F | -2.58180000 | 4.04259500  | -2.27194800 |
| C     | 2.42039200  | 0.57404500  | -1.87365400 | C | -1.87157200 | 2.04320000  | -1.22166000 |
| H     | 1.92670800  | 1.49582500  | -1.54735300 | F | -2.88999100 | 1.43812700  | -1.85173400 |
| H     | 3.40028400  | 0.85340200  | -2.27840400 | C | -2.77613900 | -0.78877600 | -0.05723200 |
| C     | 1.59781900  | -0.16810300 | -2.94523100 | C | -3.82095000 | 0.00640100  | 0.40436200  |
| H     | 1.85704000  | 0.30541300  | -3.89813800 | F | -3.63533000 | 1.31791200  | 0.67005800  |
| H     | 1.94323300  | -1.20709200 | -3.02643600 | C | -5.11026200 | -0.45257900 | 0.64669800  |
| C     | 0.07013600  | -0.13021200 | -2.79881600 | F | -6.06090400 | 0.38197400  | 1.08025800  |
| H     | -0.31443300 | -0.46028800 | -3.77043400 | C | -5.40977500 | -1.78786600 | 0.44234200  |
| H     | -0.22944100 | 0.92089200  | -2.71683700 | F | -6.64046600 | -2.25120700 | 0.67043600  |
| C     | -0.58181900 | -1.00305500 | -1.69503200 | C | -4.40494300 | -2.63599000 | 0.00521600  |
| H     | 0.11735900  | -1.82059200 | -1.46037500 | F | -4.66640200 | -3.93416000 | -0.18125700 |
| H     | -1.41826200 | -1.51486800 | -2.17903400 | C | -3.13341400 | -2.12792500 | -0.22157100 |
| C     | 3.66650700  | 0.55408200  | 0.84377100  | F | -2.21513900 | -3.03246500 | -0.61036000 |
| C     | 3.45699100  | 0.23539800  | 2.18991600  | C | -0.46954500 | -0.99940300 | 1.05101700  |
| H     | 2.75577800  | -0.55062400 | 2.46696400  | C | 0.16298500  | -2.23680700 | 1.16063700  |
| C     | 4.13647800  | 0.94802700  | 3.17119200  | C | 0.53198400  | -2.45873200 | 2.51506200  |
| H     | 3.97443500  | 0.70960600  | 4.21709200  | C | 0.09791300  | -1.35902100 | 3.21647300  |
| C     | 5.01173300  | 1.97185200  | 2.81320000  | N | -0.50797200 | -0.49815200 | 2.33816500  |
| H     | 5.53527100  | 2.52791800  | 3.58421900  | H | 0.28124600  | -2.94186400 | 0.34900200  |
| C     | 5.20916600  | 2.29314700  | 1.47304300  | H | 1.02242200  | -3.32792600 | 2.93098000  |
| H     | 5.88037600  | 3.09950600  | 1.19726700  | H | 0.15102500  | -1.11856300 | 4.26959300  |
|       |             |             |             | C | -1.11227300 | 0.74752100  | 2.77485900  |

|        |             |             |             |       |             |             |             |
|--------|-------------|-------------|-------------|-------|-------------|-------------|-------------|
| H      | -1.59165900 | 0.59139800  | 3.74395000  | C     | 0.49562100  | 2.05787700  | 0.51426300  |
| H      | -0.36375400 | 1.53935400  | 2.87407400  | F     | 1.33321800  | 1.35663700  | 1.31466900  |
| H      | -1.87339200 | 1.06512800  | 2.06380000  | C     | 0.70672800  | 3.43162500  | 0.48919300  |
| H      | 1.59827600  | -0.89983200 | 0.20674800  | F     | 1.66982300  | 3.98424900  | 1.23469800  |
| P14-TS |             |             |             | C     | -0.07611200 | 4.21754800  | -0.33825500 |
| P      | 2.93176800  | -0.78339400 | -0.29675400 | F     | 0.10601700  | 5.53624000  | -0.39724300 |
| B      | -0.67219500 | -0.23988300 | -0.30995600 | C     | -1.05492500 | 3.60623700  | -1.10961700 |
| C      | 2.43906900  | 0.37852100  | -1.64358100 | F     | -1.81557200 | 4.34662100  | -1.91838700 |
| H      | 2.32686300  | 1.33085900  | -1.11865100 | C     | -1.22269700 | 2.23131400  | -1.04012000 |
| H      | 3.26774400  | 0.52307800  | -2.34713600 | F     | -2.18375500 | 1.71653900  | -1.82326000 |
| C      | 1.13099700  | 0.08043900  | -2.42347400 | C     | -2.28365400 | -0.62734800 | -0.21122900 |
| H      | 1.40083200  | -0.44452000 | -3.34719400 | C     | -2.77147000 | -1.83444000 | -0.71035700 |
| H      | 0.75539000  | 1.05778300  | -2.75102400 | F     | -1.94802800 | -2.70050900 | -1.33146200 |
| C      | -0.02848500 | -0.70186700 | -1.76361500 | C     | -4.09201200 | -2.25061500 | -0.60605200 |
| H      | 0.25280700  | -1.75792700 | -1.72726900 | F     | -4.47874200 | -3.42439500 | -1.11383700 |
| H      | -0.83963200 | -0.67243900 | -2.50303700 | C     | -5.01380800 | -1.44036800 | 0.03605800  |
| C      | 3.63806300  | -2.35135900 | -1.08593500 | F     | -6.28707500 | -1.81927100 | 0.15313100  |
| C      | 4.85827200  | -2.12435200 | -1.98947800 | C     | -4.58633100 | -0.23368400 | 0.56278300  |
| H      | 5.03750700  | -3.03933100 | -2.56643100 | F     | -5.45465700 | 0.56050800  | 1.19543500  |
| H      | 5.77047400  | -1.90879900 | -1.43793200 | C     | -3.25384100 | 0.13705500  | 0.43159700  |
| H      | 4.68631900  | -1.31788100 | -2.71021000 | F     | -2.94265500 | 1.32612400  | 0.99043300  |
| C      | 3.95419100  | -3.34267900 | 0.04301500  | C     | -0.14306400 | -2.08838700 | 2.98674900  |
| H      | 3.05648200  | -3.56477700 | 0.63104700  | C     | 0.03535500  | -3.15061200 | 2.10428100  |
| H      | 4.72341900  | -2.98129800 | 0.72904700  | C     | 0.07656000  | -2.58468400 | 0.83748100  |
| H      | 4.31356100  | -4.28310600 | -0.39115300 | C     | 0.00456200  | -1.16229200 | 0.91954500  |
| C      | 2.55404000  | -2.98879800 | -1.96760600 | N     | -0.18484800 | -0.93389600 | 2.30595100  |
| H      | 2.26883700  | -2.34822600 | -2.80614900 | H     | -0.25617400 | -2.09429200 | 4.06326700  |
| H      | 1.65960600  | -3.25066700 | -1.40308700 | H     | 0.11087700  | -4.19464500 | 2.37037600  |
| H      | 2.95731700  | -3.91888000 | -2.38419200 | H     | 0.18579800  | -3.12507900 | -0.09127100 |
| C      | 4.27084900  | 0.10052300  | 0.74537600  | C     | -0.54865000 | 0.31725200  | 2.96260200  |
| C      | 4.23084800  | 1.62349300  | 0.54169000  | H     | -1.13550400 | 0.93064600  | 2.28076900  |
| H      | 3.27120600  | 2.07374200  | 0.78685400  | H     | -1.16771000 | 0.08017700  | 3.82879400  |
| H      | 4.50109100  | 1.90073100  | -0.48187600 | H     | 0.33229400  | 0.86960200  | 3.29011400  |
| H      | 4.97687100  | 2.07093500  | 1.20873800  | H     | 1.33408300  | -1.03960000 | 0.56323600  |
| C      | 5.72287100  | -0.31396800 | 0.47013200  | P14_P |             |             |             |
| H      | 6.36197700  | 0.22970000  | 1.17615200  | P     | 3.15409000  | -0.95512600 | -0.36469400 |
| H      | 6.04295000  | -0.03512700 | -0.53706700 | B     | -0.85989600 | -0.35158500 | 0.02223100  |
| H      | 5.91337600  | -1.37724900 | 0.62248100  | C     | 2.21812100  | 0.18143900  | -1.43713300 |
| C      | 3.93080700  | -0.24181600 | 2.20521600  | H     | 1.93694100  | 1.00903700  | -0.78284400 |
| H      | 3.97388200  | -1.32241600 | 2.38266900  | H     | 2.93067500  | 0.58025000  | -2.16955700 |
| H      | 2.92850000  | 0.10232700  | 2.47413300  | C     | 0.96778500  | -0.38284000 | -2.13530100 |
| H      | 4.65221900  | 0.23884300  | 2.87647100  | H     | 1.29743900  | -1.05355300 | -2.93924900 |
| C      | -0.46911900 | 1.39050700  | -0.22043400 | H     | 0.51229200  | 0.46896100  | -2.65052700 |

|   |             |             |             |        |             |             |             |
|---|-------------|-------------|-------------|--------|-------------|-------------|-------------|
| C | -0.09023300 | -1.09518300 | -1.27270900 | F      | -4.78675700 | -3.31939500 | -0.81574200 |
| H | 0.33581700  | -2.03940900 | -0.91251100 | C      | -5.29295600 | -1.04095200 | -0.49501300 |
| H | -0.85659400 | -1.41131400 | -1.98998400 | F      | -6.59708400 | -1.28533800 | -0.64175500 |
| C | 3.80204300  | -2.41148800 | -1.32780900 | C      | -4.83952200 | 0.24253100  | -0.24652900 |
| C | 4.37566100  | -1.92672500 | -2.66576300 | F      | -5.71330400 | 1.25011900  | -0.14782300 |
| H | 4.76912500  | -2.79467900 | -3.20505400 | C      | -3.47571300 | 0.47194900  | -0.09856200 |
| H | 5.19685200  | -1.21550000 | -2.53946000 | F      | -3.14441700 | 1.75164200  | 0.16895300  |
| H | 3.60688100  | -1.46798800 | -3.29483300 | C      | -0.62570800 | -1.62261300 | 3.62561000  |
| C | 4.87146300  | -3.16626700 | -0.52770000 | C      | 0.16221300  | -2.58749000 | 3.04909800  |
| H | 4.49382500  | -3.50027000 | 0.44372300  | C      | 0.22122800  | -2.27748800 | 1.66282800  |
| H | 5.77981200  | -2.58031500 | -0.37307500 | C      | -0.51891000 | -1.12537700 | 1.41589900  |
| H | 5.14940800  | -4.05833900 | -1.09830600 | N      | -1.03497500 | -0.75996100 | 2.64378700  |
| C | 2.63816600  | -3.38202800 | -1.58671100 | H      | -0.93721400 | -1.47416200 | 4.65055000  |
| H | 1.85172600  | -2.94955600 | -2.20665000 | H      | 0.62871200  | -3.41892400 | 3.55929500  |
| H | 2.19233100  | -3.74152400 | -0.65449300 | H      | 0.70112100  | -2.88605600 | 0.90741800  |
| H | 3.04065100  | -4.25104900 | -2.11829900 | C      | -1.93869900 | 0.34229100  | 2.90853800  |
| C | 4.42335600  | 0.01327700  | 0.59505100  | H      | -1.92978800 | 1.04943000  | 2.08090900  |
| C | 3.74700900  | 1.30358500  | 1.08673400  | H      | -2.96419900 | -0.01863000 | 3.04156600  |
| H | 2.83521400  | 1.10123200  | 1.65432800  | H      | -1.62783000 | 0.86652900  | 3.81601000  |
| H | 3.51737500  | 1.99036600  | 0.26757800  | H      | 2.25453300  | -1.44745200 | 0.60042300  |
| H | 4.44563900  | 1.81484000  | 1.75684600  |        |             |             |             |
| C | 5.62970100  | 0.37745100  | -0.27712800 | P15-TS |             |             |             |
| H | 6.29050400  | 1.02574300  | 0.30781200  | P      | 1.17554500  | -0.67188400 | 0.22218000  |
| H | 5.33668500  | 0.93298800  | -1.17376500 | B      | -1.54312200 | -0.38635300 | 0.25077400  |
| H | 6.21125300  | -0.49664600 | -0.58029700 | C      | -0.34258500 | -1.06010300 | -0.72231800 |
| C | 4.85082400  | -0.80094100 | 1.82591600  | H      | -0.34731600 | -2.14282000 | -0.52349500 |
| H | 5.40747200  | -1.70300500 | 1.56988000  | C      | -0.48504400 | -0.90290300 | -2.23472200 |
| H | 3.98865300  | -1.08022600 | 2.44008700  | H      | -0.55710700 | 0.14835200  | -2.51156700 |
| H | 5.50570100  | -0.17295600 | 2.43875300  | H      | -1.45716700 | -1.34598200 | -2.48081600 |
| C | -0.42021000 | 1.24691200  | 0.03618000  | C      | 0.60406900  | -1.58974300 | -3.05216900 |
| C | 0.36494400  | 1.88593700  | 0.98918300  | H      | 0.72625800  | -2.63523600 | -2.74644800 |
| F | 0.72096900  | 1.27235600  | 2.13610700  | H      | 1.56459600  | -1.08135500 | -2.93872000 |
| C | 0.88512400  | 3.16923900  | 0.83740300  | H      | 0.35426700  | -1.58183200 | -4.11618800 |
| F | 1.68840400  | 3.68584900  | 1.77448400  | C      | 1.95299700  | 0.96376700  | 0.01906000  |
| C | 0.59951200  | 3.89361800  | -0.30596900 | C      | 1.87583800  | 1.77607300  | -1.10825000 |
| F | 1.09611700  | 5.11965500  | -0.47712800 | F      | 1.31835400  | 1.33186900  | -2.23091800 |
| C | -0.21742800 | 3.32237400  | -1.27319300 | C      | 2.36764400  | 3.07368400  | -1.10931700 |
| F | -0.50845400 | 4.00730600  | -2.38250300 | F      | 2.25204100  | 3.83573500  | -2.18944400 |
| C | -0.70194900 | 2.03925400  | -1.07665800 | C      | 2.96954500  | 3.57989800  | 0.03603900  |
| F | -1.46806200 | 1.53974000  | -2.06306700 | F      | 3.44092700  | 4.81564400  | 0.04346400  |
| C | -2.50172200 | -0.51670700 | -0.18800500 | C      | 3.08965600  | 2.78473600  | 1.16882700  |
| C | -3.01932700 | -1.79052800 | -0.42518900 | F      | 3.66827500  | 3.26685500  | 2.26022900  |
| F | -2.19223700 | -2.84734600 | -0.51249300 | C      | 2.58241400  | 1.49490800  | 1.14602100  |
| C | -4.36888300 | -2.07066100 | -0.58387200 | F      | 2.69469200  | 0.75791700  | 2.24924000  |

|   |             |             |             |       |             |             |             |
|---|-------------|-------------|-------------|-------|-------------|-------------|-------------|
| C | 2.54101800  | -1.83728500 | -0.11411800 | H     | -1.85254500 | 1.41364200  | 3.55156800  |
| C | 3.53359400  | -1.63037100 | -1.07371600 | H     | 0.16577000  | -0.89374800 | 1.56935600  |
| F | 3.51685200  | -0.54516100 | -1.84865500 |       |             |             |             |
| C | 4.56411400  | -2.53799600 | -1.27241900 | P15_P |             |             |             |
| F | 5.49055000  | -2.31495400 | -2.19589300 | P     | 1.26096100  | -0.67776400 | 0.25875900  |
| C | 4.62165100  | -3.69012400 | -0.49679600 | B     | -1.57578600 | -0.41065300 | 0.38711100  |
| F | 5.60009900  | -4.56199400 | -0.68026600 | C     | -0.31401200 | -1.17892300 | -0.47149500 |
| C | 3.65209600  | -3.92717700 | 0.46837200  | H     | -0.29620400 | -2.22593700 | -0.13081900 |
| F | 3.70897000  | -5.02280700 | 1.21465200  | C     | -0.43666600 | -1.19235800 | -2.00136800 |
| C | 2.63717200  | -2.99885800 | 0.64965700  | H     | -0.56555200 | -0.18004600 | -2.38269800 |
| F | 1.73258200  | -3.24710600 | 1.59740000  | H     | -1.38145000 | -1.70639600 | -2.19819000 |
| C | -1.29647000 | 1.25219400  | 0.20403000  | C     | 0.68278900  | -1.90178300 | -2.75886400 |
| C | -1.69376700 | 1.98744300  | -0.91546100 | H     | 1.60778600  | -1.31818400 | -2.75634700 |
| F | -2.40788500 | 1.39949600  | -1.88487200 | H     | 0.40157600  | -2.04582500 | -3.80483200 |
| C | -1.40014800 | 3.32970000  | -1.11871500 | H     | 0.89011100  | -2.88961600 | -2.33191600 |
| F | -1.80429600 | 3.95412400  | -2.22123700 | C     | 1.91632600  | 0.99580200  | 0.04859000  |
| C | -0.67924800 | 4.02232400  | -0.15572200 | C     | 1.77624300  | 1.73695900  | -1.11988200 |
| F | -0.35410500 | 5.29779000  | -0.33642000 | F     | 1.23494500  | 1.18391200  | -2.20078800 |
| C | -0.27719300 | 3.35246300  | 0.98748000  | C     | 2.18112300  | 3.06034200  | -1.19245200 |
| F | 0.45814800  | 3.98482400  | 1.90709900  | F     | 1.99304700  | 3.76037400  | -2.30084600 |
| C | -0.57945700 | 2.00383100  | 1.13091000  | C     | 2.75110700  | 3.66191200  | -0.07540900 |
| F | -0.03761300 | 1.42084800  | 2.22497400  | F     | 3.12679800  | 4.92559000  | -0.13241200 |
| C | -3.04981100 | -0.82741800 | -0.22968300 | C     | 2.92866800  | 2.93777600  | 1.09765800  |
| C | -4.17364400 | -0.00822100 | -0.14686500 | F     | 3.47310800  | 3.51326400  | 2.15772100  |
| F | -4.06535300 | 1.26784800  | 0.27353500  | C     | 2.50837900  | 1.61724000  | 1.14914200  |
| C | -5.46239300 | -0.41585200 | -0.46753200 | F     | 2.67802500  | 0.94287600  | 2.28278700  |
| F | -6.48708900 | 0.42944500  | -0.36137100 | C     | 2.66267400  | -1.78944200 | -0.07421800 |
| C | -5.68025600 | -1.71638500 | -0.89417900 | C     | 3.62541800  | -1.54858300 | -1.05366100 |
| F | -6.90599900 | -2.12986800 | -1.20327400 | F     | 3.55014700  | -0.46341000 | -1.82441900 |
| C | -4.60069300 | -2.58116500 | -0.98666900 | C     | 4.67083500  | -2.43081300 | -1.27984900 |
| F | -4.78624900 | -3.83892500 | -1.38636400 | F     | 5.57144300  | -2.18076600 | -2.21897700 |
| C | -3.33267300 | -2.12531600 | -0.65180300 | C     | 4.76932300  | -3.58565400 | -0.51080600 |
| F | -2.34670500 | -3.03774900 | -0.76004500 | F     | 5.76199600  | -4.43140900 | -0.72008000 |
| C | -1.97360700 | -1.59768700 | 3.84754800  | C     | 3.82482300  | -3.85544500 | 0.47183700  |
| C | -1.44245500 | -2.75990000 | 3.31488000  | F     | 3.92108700  | -4.95485200 | 1.20317500  |
| C | -1.07465400 | -2.44630000 | 2.00577700  | C     | 2.78930900  | -2.95558300 | 0.67804000  |
| C | -1.32252200 | -1.07201400 | 1.74769700  | F     | 1.89651600  | -3.22832000 | 1.62549300  |
| N | -1.91038200 | -0.60658900 | 2.93385500  | C     | -1.32660100 | 1.21656300  | 0.20338200  |
| H | -2.40069200 | -1.41367800 | 4.82441800  | C     | -1.64599600 | 1.89968800  | -0.97138000 |
| H | -1.34161700 | -3.70844400 | 3.81942900  | F     | -2.26031000 | 1.26287600  | -1.97838500 |
| H | -0.63220600 | -3.13468500 | 1.30055100  | C     | -1.35165000 | 3.23800700  | -1.20528600 |
| C | -2.55732500 | 0.68218900  | 3.15573000  | F     | -1.66794300 | 3.81428600  | -2.36203700 |
| H | -2.98171800 | 1.04895200  | 2.22193900  | C     | -0.70787400 | 3.97318200  | -0.22009200 |
| H | -3.36837200 | 0.53816200  | 3.87045300  | F     | -0.35202700 | 5.23635100  | -0.43599900 |

|        |             |             |             |   |             |             |             |
|--------|-------------|-------------|-------------|---|-------------|-------------|-------------|
| C      | -0.37112200 | 3.34974900  | 0.97013700  | C | 2.85197100  | 3.61814800  | -0.00508100 |
| F      | 0.32491200  | 4.02056000  | 1.89495800  | F | 3.26990000  | 4.87305200  | -0.00705500 |
| C      | -0.66825100 | 2.00402000  | 1.14472500  | C | 3.04009600  | 2.82662900  | 1.12175400  |
| F      | -0.16401000 | 1.45430300  | 2.26978900  | F | 3.63483500  | 3.32991500  | 2.19471400  |
| C      | -3.02153100 | -0.91819200 | -0.23521100 | C | 2.57937200  | 1.51913500  | 1.11252200  |
| C      | -4.15483200 | -0.12335700 | -0.38983100 | F | 2.74683800  | 0.78153300  | 2.20872400  |
| F      | -4.11398100 | 1.20057100  | -0.13910900 | C | 2.53518200  | -1.84007400 | -0.15834000 |
| C      | -5.39961000 | -0.60450900 | -0.77928100 | C | 3.53203400  | -1.62067500 | -1.11156000 |
| F      | -6.43636300 | 0.22391400  | -0.90291100 | F | 3.49556900  | -0.54248800 | -1.89685700 |
| C      | -5.56192900 | -1.95621000 | -1.03428900 | C | 4.57976800  | -2.50951800 | -1.30057600 |
| F      | -6.74471000 | -2.43762800 | -1.40820500 | F | 5.50465300  | -2.27608100 | -2.22289400 |
| C      | -4.47152400 | -2.79979400 | -0.88654600 | C | 4.65724600  | -3.65258500 | -0.51317100 |
| F      | -4.60148500 | -4.10551700 | -1.12239900 | F | 5.65296900  | -4.50646200 | -0.68484600 |
| C      | -3.25223500 | -2.27069200 | -0.48810000 | C | 3.68980100  | -3.89808600 | 0.45160600  |
| F      | -2.25096800 | -3.16477700 | -0.36348800 | F | 3.76872700  | -4.98214300 | 1.21197600  |
| C      | -2.11920500 | -1.14178700 | 4.09799400  | C | 2.65539100  | -2.98891500 | 0.62219100  |
| C      | -1.33242800 | -2.22448300 | 3.80254200  | F | 1.76481500  | -3.24069400 | 1.57901900  |
| C      | -0.98784000 | -2.10508600 | 2.43107100  | C | -1.31647800 | 1.26591700  | 0.27965300  |
| C      | -1.55777300 | -0.94560000 | 1.91736900  | C | -1.63687100 | 1.99353500  | -0.86954800 |
| N      | -2.26052400 | -0.38390100 | 2.96471400  | F | -2.26805900 | 1.38567700  | -1.88094500 |
| H      | -2.60015300 | -0.84232900 | 5.01835600  | C | -1.32169600 | 3.33084900  | -1.06071900 |
| H      | -1.05466000 | -3.01727300 | 4.48129100  | F | -1.64703300 | 3.95594400  | -2.18933800 |
| H      | -0.43007500 | -2.84091500 | 1.86821700  | C | -0.63435000 | 4.01435100  | -0.06507400 |
| C      | -3.01539100 | 0.85360800  | 2.94714300  | F | -0.26491100 | 5.27908600  | -0.24314900 |
| H      | -3.40619700 | 1.04632100  | 1.94902300  | C | -0.28404000 | 3.34190900  | 1.09291100  |
| H      | -3.85740700 | 0.76384900  | 3.63659500  | F | 0.44660700  | 3.96049500  | 2.02609600  |
| H      | -2.39615300 | 1.70162500  | 3.25673800  | C | -0.61400600 | 1.99780100  | 1.22939300  |
| H      | 1.07124300  | -0.78735900 | 1.64016700  | F | -0.09987400 | 1.39596700  | 2.32599100  |
|        |             |             |             | C | -3.06049200 | -0.80597500 | -0.23791400 |
| P16_TS |             |             |             | C | -4.18126800 | 0.01912600  | -0.17884700 |
| P      | 1.17748800  | -0.67117800 | 0.19572500  | F | -4.07403600 | 1.29470400  | 0.23998400  |
| B      | -1.56183000 | -0.37335900 | 0.25541300  | C | -5.46628300 | -0.38976400 | -0.51297000 |
| C      | -0.34996500 | -0.85633400 | -0.76321200 | F | -6.49183800 | 0.45737600  | -0.42915800 |
| C      | -0.47145900 | -1.22842000 | -2.04232200 | C | -5.67996300 | -1.69453900 | -0.92920100 |
| H      | -1.49609700 | -1.31728300 | -2.40902900 | F | -6.90245100 | -2.10825600 | -1.25202800 |
| C      | 0.58096400  | -1.52152300 | -3.06229600 | C | -4.60265100 | -2.56489400 | -0.99343500 |
| H      | 0.35864500  | -0.96846800 | -3.98041400 | F | -4.78890700 | -3.82744100 | -1.37889600 |
| H      | 0.57643100  | -2.58534000 | -3.32430200 | C | -3.33710200 | -2.11138200 | -0.64398600 |
| H      | 1.57894500  | -1.23286300 | -2.73950400 | F | -2.35428500 | -3.02501600 | -0.71227500 |
| C      | 1.93792900  | 0.96991500  | 0.00251400  | C | -1.92502500 | -1.84965400 | 3.74346800  |
| C      | 1.78645100  | 1.77863200  | -1.12144600 | C | -1.36130900 | -2.94961300 | 3.11814300  |
| F      | 1.19668800  | 1.31819500  | -2.22023400 | C | -1.01346500 | -2.52236700 | 1.83448400  |
| C      | 2.22913200  | 3.09409100  | -1.13128800 | C | -1.30914700 | -1.14479300 | 1.69072600  |
| F      | 2.03155300  | 3.86090000  | -2.19598300 | N | -1.90112800 | -0.78879200 | 2.90795500  |

|       |             |             |             |        |             |             |             |
|-------|-------------|-------------|-------------|--------|-------------|-------------|-------------|
| H     | -2.34602400 | -1.75423500 | 4.73555300  | C      | 5.40017800  | -0.59757000 | -0.81330600 |
| H     | -1.22766200 | -3.93020200 | 3.54867700  | F      | 6.44301900  | 0.22422700  | -0.95061500 |
| H     | -0.56656100 | -3.12106800 | 1.05291700  | C      | 5.55236400  | -1.95133300 | -1.05953700 |
| C     | -2.57732300 | 0.46548000  | 3.21588100  | F      | 6.73120000  | -2.44254900 | -1.43945400 |
| H     | -3.39940000 | 0.25522400  | 3.90117500  | C      | 4.46000000  | -2.78816200 | -0.89680300 |
| H     | -1.89348300 | 1.18031200  | 3.67427700  | F      | 4.58584000  | -4.09812200 | -1.12297500 |
| H     | -2.99021100 | 0.89288900  | 2.30179600  | C      | 3.24532500  | -2.25404500 | -0.49005800 |
| H     | 0.18965100  | -0.93975500 | 1.52904700  | F      | 2.24492400  | -3.13784000 | -0.34104800 |
|       |             |             |             | C      | 1.35397400  | 1.24609100  | 0.25330400  |
| P16_P |             |             |             | C      | 0.69748200  | 2.02896800  | 1.19596700  |
| C     | -0.63913700 | -1.76241000 | -2.81847700 | F      | 0.21396800  | 1.48161000  | 2.33072300  |
| H     | -1.61523400 | -1.32548900 | -2.61567100 | C      | 0.38508400  | 3.37076900  | 1.00951100  |
| H     | -0.74308900 | -2.85081100 | -2.90033200 | F      | -0.30721000 | 4.04537100  | 1.93515800  |
| H     | -0.32172100 | -1.40182600 | -3.80127200 | C      | 0.70071700  | 3.98415800  | -0.19068000 |
| C     | 0.41067300  | -1.41768300 | -1.81094300 | F      | 0.33385100  | 5.24433700  | -0.41416900 |
| H     | 1.43012600  | -1.55511300 | -2.17327400 | C      | 1.32758600  | 3.24324700  | -1.18351200 |
| C     | 0.32078700  | -0.95667500 | -0.55313200 | F      | 1.60554300  | 3.80980700  | -2.35726500 |
| P     | -1.26870300 | -0.68215400 | 0.22591300  | C      | 1.62359000  | 1.90848200  | -0.94533500 |
| C     | -2.63949000 | -1.82113600 | -0.11846900 | F      | 2.17894100  | 1.23891700  | -1.96435400 |
| C     | -3.62051900 | -1.56881200 | -1.07745800 | C      | 1.54390400  | -0.99446800 | 1.87570500  |
| F     | -3.54560200 | -0.48161100 | -1.84668100 | C      | 0.97052900  | -2.18263000 | 2.30770900  |
| C     | -4.67659600 | -2.43973100 | -1.28732700 | C      | 1.30440700  | -2.38571800 | 3.67264200  |
| F     | -5.59203800 | -2.17837100 | -2.20988900 | C      | 2.09073600  | -1.32173600 | 4.04131200  |
| C     | -4.77284600 | -3.59260700 | -0.51632400 | N      | 2.23950500  | -0.49599900 | 2.95819400  |
| F     | -5.77925100 | -4.42703900 | -0.70589700 | H      | 0.42051800  | -2.86635900 | 1.67487300  |
| C     | -3.81440900 | -3.87117300 | 0.44848300  | H      | 1.02011800  | -3.21675300 | 4.30247400  |
| F     | -3.91168300 | -4.96829400 | 1.18460900  | H      | 2.56470500  | -1.07961000 | 4.98237300  |
| C     | -2.76634000 | -2.98357800 | 0.63980900  | C      | 3.01454500  | 0.72909100  | 3.00615000  |
| F     | -1.87230500 | -3.26252800 | 1.58174300  | H      | 3.85208000  | 0.59273300  | 3.69343100  |
| C     | -1.93387800 | 0.99139200  | 0.04814200  | H      | 3.41497800  | 0.96339600  | 2.01934500  |
| C     | -2.50055600 | 1.62303400  | 1.15475600  | H      | 2.40844200  | 1.57228400  | 3.35181200  |
| F     | -2.65987000 | 0.95324400  | 2.29246900  | H      | -1.05897100 | -0.81437000 | 1.60116400  |
| C     | -2.89650100 | 2.95087400  | 1.10636400  |        |             |             |             |
| F     | -3.41509400 | 3.54112500  | 2.17271200  | P18_TS |             |             |             |
| C     | -2.71746800 | 3.67003800  | -0.06912300 | P      | -2.39268423 | 0.49113194  | 0.27584762  |
| F     | -3.06353200 | 4.94337500  | -0.12158400 | Si     | 3.95763601  | 1.31149396  | -1.51185422 |
| C     | -2.16416400 | 3.06050900  | -1.18941400 | B      | 1.11935561  | -0.20503422 | 0.42430018  |
| F     | -1.96369900 | 3.76256100  | -2.29581600 | C      | -1.37760771 | 1.28853196  | -1.04308227 |
| C     | -1.77896100 | 1.73105800  | -1.12143600 | H      | -0.98786596 | 0.53429983  | -1.72231957 |
| F     | -1.23948900 | 1.17491700  | -2.20153900 | H      | -1.98874631 | 1.98686525  | -1.61813438 |
| B     | 1.58851600  | -0.38944000 | 0.37847900  | C      | -0.20645912 | 2.02711630  | -0.35593897 |
| C     | 3.02777200  | -0.89674500 | -0.24772800 | H      | -0.09328885 | 2.98979440  | -0.85095235 |
| C     | 4.16144400  | -0.10733100 | -0.41806100 | H      | -0.50649626 | 2.27587831  | 0.66796495  |
| F     | 4.12560900  | 1.21779600  | -0.17498900 | C      | 1.11589979  | 1.24180905  | -0.37439397 |

|   |             |             |             |   |             |             |             |
|---|-------------|-------------|-------------|---|-------------|-------------|-------------|
| C | 2.13305612  | 1.78229799  | -1.09178053 | C | -3.41388672 | -0.94203075 | -0.26164083 |
| C | 4.19967891  | 1.75463248  | -3.33713070 | C | -4.07483230 | -1.62162564 | 0.78665389  |
| H | 5.22370557  | 1.49605295  | -3.62676436 | C | -4.88028100 | -2.71991204 | 0.49294689  |
| H | 4.04448997  | 2.81653472  | -3.54110339 | H | -5.38380509 | -3.23116074 | 1.30989095  |
| H | 3.52011599  | 1.18453589  | -3.97957875 | C | -5.03877520 | -3.18902015 | -0.80588115 |
| C | 5.10504795  | 2.42960662  | -0.50442056 | C | -4.36101808 | -2.52428937 | -1.82342347 |
| H | 4.97938921  | 2.28900427  | 0.57261673  | H | -4.45550947 | -2.88714824 | -2.84425477 |
| H | 4.94904243  | 3.48688034  | -0.73389372 | C | -3.54305634 | -1.41948707 | -1.58525422 |
| H | 6.14180167  | 2.18419019  | -0.76023047 | C | -3.91289208 | -1.22760777 | 2.23393140  |
| C | 4.69849672  | -0.42232452 | -1.35832745 | H | -4.41374493 | -1.95087292 | 2.87989113  |
| H | 5.53483669  | -0.45196149 | -2.06611358 | H | -4.33768902 | -0.24061064 | 2.44319097  |
| H | 4.02212215  | -1.23878142 | -1.60709916 | H | -2.85313599 | -1.20635212 | 2.51379347  |
| H | 5.11464725  | -0.59337295 | -0.36407996 | C | -5.86338979 | -4.41271694 | -1.09949041 |
| C | 1.90453635  | 3.07750076  | -1.82536583 | H | -6.63023560 | -4.56830540 | -0.33742562 |
| C | 1.30156960  | 3.07315247  | -3.09012587 | H | -5.22435527 | -5.30167543 | -1.11779613 |
| H | 0.98921915  | 2.12097643  | -3.51365313 | H | -6.35261200 | -4.33739936 | -2.07355246 |
| C | 1.11542823  | 4.25480809  | -3.79876649 | C | -2.82761492 | -0.83788304 | -2.78043316 |
| H | 0.64878947  | 4.22888555  | -4.77910972 | H | -1.75281680 | -1.03775036 | -2.73202498 |
| C | 1.53261485  | 5.46917940  | -3.25605642 | H | -2.96212602 | 0.24075956  | -2.87174460 |
| H | 1.39344187  | 6.39239787  | -3.80940785 | H | -3.20218358 | -1.29927788 | -3.69599355 |
| C | 2.12683154  | 5.48901520  | -1.99803918 | C | 2.61567095  | -0.67595555 | 0.94930902  |
| H | 2.44813815  | 6.43107017  | -1.56380036 | F | 3.07094064  | 1.50350026  | 1.80610236  |
| C | 2.31065168  | 4.30315869  | -1.28895151 | C | 3.41501145  | 0.21264495  | 1.67532457  |
| H | 2.76263971  | 4.32025689  | -0.30060896 | F | 5.31984214  | 0.77945228  | 2.95244455  |
| C | -3.59475903 | 1.79465420  | 0.81077279  | C | 4.60571194  | -0.13770635 | 2.29812450  |
| C | -4.59870647 | 2.26910789  | -0.07451283 | F | 6.18422587  | -1.80928566 | 2.83853093  |
| C | -5.47643401 | 3.25719298  | 0.36232440  | C | 5.05301237  | -1.44940394 | 2.23627419  |
| H | -6.23894749 | 3.61509921  | -0.32565599 | F | 4.70805703  | -3.64360269 | 1.45386090  |
| C | -5.41786589 | 3.79742088  | 1.64605618  | C | 4.29821480  | -2.37682671 | 1.53626801  |
| C | -4.44760334 | 3.30629851  | 2.50612745  | F | 2.48050125  | -2.94972374 | 0.23832497  |
| H | -4.38452676 | 3.69752481  | 3.51881323  | C | 3.12522807  | -1.97217875 | 0.90912749  |
| C | -3.53690552 | 2.31916963  | 2.11718863  | C | 0.43040732  | -1.36944411 | -0.56483103 |
| C | -4.79400241 | 1.76318478  | -1.48211682 | F | 1.92079155  | -0.82852393 | -2.34332662 |
| H | -5.66318377 | 2.24544984  | -1.93230982 | C | 0.93454926  | -1.59242705 | -1.85295937 |
| H | -4.95696954 | 0.68390104  | -1.50763427 | F | 1.07640275  | -2.76145923 | -3.90136774 |
| H | -3.93627168 | 1.98885159  | -2.12086180 | C | 0.51738549  | -2.60992956 | -2.70158011 |
| C | -6.37648714 | 4.87759472  | 2.06991278  | F | -0.91202367 | -4.45028042 | -3.09924585 |
| H | -7.40819178 | 4.60105708  | 1.83593191  | C | -0.49007251 | -3.47583816 | -2.29698438 |
| H | -6.16117263 | 5.81253882  | 1.54324274  | F | -2.03785522 | -4.08331658 | -0.62647923 |
| H | -6.30752201 | 5.07144727  | 3.14213728  | C | -1.05111458 | -3.29167949 | -1.04734174 |
| C | -2.51971738 | 1.90712339  | 3.14852355  | F | -1.24097627 | -2.17027446 | 0.94365106  |
| H | -2.93203550 | 2.02617592  | 4.15347149  | C | -0.59256875 | -2.25661995 | -0.23770168 |
| H | -1.63335935 | 2.54384879  | 3.08398354  | H | -1.07426759 | 0.15972152  | 1.32877724  |
| H | -2.18038252 | 0.87748866  | 3.04356670  | C | 0.50682385  | -0.45299323 | 4.13836623  |

|       |             |             |             |   |             |             |             |
|-------|-------------|-------------|-------------|---|-------------|-------------|-------------|
| C     | 0.59420316  | 0.92429241  | 4.01388339  | H | 1.12920900  | 6.58944700  | -0.88331700 |
| C     | 0.50868045  | 1.18318381  | 2.64858741  | C | 1.41791300  | 4.45944300  | -0.91724500 |
| C     | 0.33045600  | -0.01636474 | 1.91084447  | H | 2.09588400  | 4.45537000  | -0.06712400 |
| N     | 0.36688787  | -1.01787949 | 2.92376093  | C | -3.88072200 | 1.42179500  | 0.87887700  |
| H     | 0.54672266  | -1.07185059 | 5.02572263  | C | -4.83357400 | 2.07078000  | 0.06501600  |
| H     | 0.70793704  | 1.63444837  | 4.81919968  | C | -5.74257600 | 2.93952900  | 0.66205700  |
| H     | 0.60828399  | 2.15982257  | 2.19905634  | H | -6.48128100 | 3.43500500  | 0.03716100  |
| C     | 0.52495644  | -2.46428460 | 2.78559125  | C | -5.72545100 | 3.19066100  | 2.03330600  |
| H     | 0.88819787  | -2.71564402 | 1.79304907  | C | -4.76920300 | 2.54386500  | 2.81337900  |
| H     | 1.26955839  | -2.79619324 | 3.51176857  | H | -4.74563000 | 2.73234500  | 3.88332400  |
| H     | -0.41719357 | -2.98570496 | 2.96116548  | C | -3.83482800 | 1.65903900  | 2.27351000  |
| P18_P |             |             |             | C | -4.88880000 | 1.87540000  | -1.42824000 |
| P     | -2.68034000 | 0.29233500  | 0.12848100  | H | -5.75368800 | 2.39244800  | -1.84708500 |
| Si    | 3.37341500  | 1.75392700  | -2.00255400 | H | -4.96604400 | 0.81959500  | -1.70514300 |
| B     | 1.48724400  | -0.10983600 | 0.75232200  | H | -3.99836000 | 2.29116000  | -1.91344000 |
| C     | -1.36105200 | 1.20010000  | -0.73245300 | C | -6.69519500 | 4.16056700  | 2.65023200  |
| H     | -0.88610400 | 0.50773400  | -1.42741900 | H | -7.64416000 | 4.17062700  | 2.10906100  |
| H     | -1.80884800 | 2.00809700  | -1.31539100 | H | -6.28793800 | 5.17679000  | 2.62157000  |
| C     | -0.32897700 | 1.72831400  | 0.29632600  | H | -6.89360800 | 3.91350600  | 3.69556000  |
| H     | -0.40470800 | 2.81726400  | 0.33814600  | C | -2.84775000 | 1.01449200  | 3.21918200  |
| H     | -0.57211700 | 1.35710100  | 1.29138600  | H | -3.04405200 | 1.35132000  | 4.23830300  |
| C     | 1.08391600  | 1.25300900  | -0.07778300 | H | -1.80722500 | 1.26985000  | 2.99339300  |
| C     | 1.73207400  | 1.96429800  | -1.03349700 | H | -2.92378100 | -0.07736600 | 3.21958400  |
| C     | 3.06465700  | 2.45682700  | -3.73587300 | C | -3.37549500 | -1.12678700 | -0.75886800 |
| H     | 3.98938200  | 2.35357700  | -4.31609000 | C | -3.97524900 | -2.11862400 | 0.05716100  |
| H     | 2.79480300  | 3.51648900  | -3.72771600 | C | -4.40398000 | -3.30165100 | -0.53271700 |
| H     | 2.28137600  | 1.91471800  | -4.27698800 | H | -4.84947600 | -4.06720200 | 0.09700600  |
| C     | 4.72693800  | 2.85248800  | -1.27545700 | C | -4.25616100 | -3.53935900 | -1.89957800 |
| H     | 5.08820300  | 2.53060600  | -0.29672300 | C | -3.67543800 | -2.54652000 | -2.68116200 |
| H     | 4.37696100  | 3.88597200  | -1.17941000 | H | -3.55255300 | -2.71523900 | -3.74794600 |
| H     | 5.57995400  | 2.86186300  | -1.96430200 | C | -3.22830000 | -1.33551500 | -2.14614600 |
| C     | 4.10039000  | 0.04345600  | -2.33729200 | C | -4.11116100 | -1.97258100 | 1.55188100  |
| H     | 4.61965300  | 0.09658400  | -3.30135300 | H | -4.71089400 | -2.79074200 | 1.95377700  |
| H     | 3.35211200  | -0.74700600 | -2.40611200 | H | -4.59597600 | -1.03343600 | 1.83628500  |
| H     | 4.84196700  | -0.24331200 | -1.58960400 | H | -3.13317600 | -2.02132200 | 2.04501000  |
| C     | 1.09979400  | 3.23956100  | -1.52846700 | C | -4.66405300 | -4.85864400 | -2.49093100 |
| C     | 0.22003200  | 3.25944500  | -2.61949300 | H | -4.72058200 | -4.80923600 | -3.58012700 |
| H     | -0.01668700 | 2.32419300  | -3.12264200 | H | -5.63357400 | -5.18428700 | -2.10500000 |
| C     | -0.32959500 | 4.45376100  | -3.07893800 | H | -3.92777100 | -5.62402100 | -2.22501000 |
| H     | -1.00488600 | 4.44580500  | -3.92988800 | C | -2.58259900 | -0.37193400 | -3.11361800 |
| C     | -0.00553700 | 5.65837900  | -2.45768600 | H | -1.49985100 | -0.53775800 | -3.16898000 |
| H     | -0.42811800 | 6.59088100  | -2.81829000 | H | -2.75743700 | 0.67535700  | -2.86660400 |
| C     | 0.87073300  | 5.65636500  | -1.37514800 | H | -2.98172300 | -0.54312300 | -4.11541700 |
|       |             |             |             | C | 3.07695200  | -0.54702700 | 0.60027700  |



|        |             |             |             |   |             |             |             |
|--------|-------------|-------------|-------------|---|-------------|-------------|-------------|
| F      | 3.69736200  | 1.61849100  | 1.35760200  | C | -1.62716400 | -1.61355600 | 3.11301100  |
| C      | 4.04762800  | 0.37368200  | 1.00349500  | H | -2.62096400 | -1.41957100 | 3.51091500  |
| F      | 6.27381400  | 1.03916800  | 1.44827800  | C | -1.18224900 | -0.86843100 | 2.01278700  |
| C      | 5.40471900  | 0.09343800  | 1.07828100  | C | -2.16883200 | 0.16671300  | 1.49790500  |
| F      | 7.15869500  | -1.47266000 | 0.83683600  | H | -1.67139500 | 1.12176400  | 1.31414000  |
| C      | 5.86039600  | -1.17767200 | 0.76076000  | H | -2.93606900 | 0.35858900  | 2.25439500  |
| F      | 5.35285500  | -3.37433900 | 0.08118500  | C | -4.32440100 | -1.49459200 | 0.15833400  |
| C      | 4.93989700  | -2.13750700 | 0.37500700  | C | -5.24482500 | -1.41599800 | -1.07677000 |
| F      | 2.77943900  | -2.81929100 | -0.06058000 | H | -4.67397600 | -1.73951100 | -1.95886600 |
| C      | 3.59186100  | -1.80357000 | 0.29797700  | H | -6.04502600 | -2.15422800 | -0.93389400 |
| C      | 0.46526900  | -1.33881500 | 0.21242700  | C | -5.84752500 | -0.03803800 | -1.36360200 |
| F      | 1.13470600  | -0.95919600 | -2.03356200 | H | -6.42149700 | 0.31507200  | -0.49840800 |
| C      | 0.44255500  | -1.68905700 | -1.14017800 | H | -6.56739400 | -0.13546600 | -2.18252800 |
| F      | -0.23118600 | -3.00635600 | -2.98907500 | C | -4.78975400 | 0.99437200  | -1.76182800 |
| C      | -0.24847600 | -2.76699000 | -1.67453900 | H | -5.27497800 | 1.92695600  | -2.07965900 |
| F      | -1.63698700 | -4.64572100 | -1.31538000 | H | -4.24277100 | 0.61331200  | -2.63608100 |
| C      | -0.98563600 | -3.58690900 | -0.83462900 | C | -3.77129000 | 1.35056000  | -0.66234800 |
| F      | -1.82980100 | -3.98381300 | 1.32503800  | C | -2.66765800 | 2.22987600  | -1.27303700 |
| C      | -1.05957300 | -3.25815200 | 0.50605100  | H | -2.22494800 | 1.75375000  | -2.15165100 |
| F      | -0.60193000 | -1.87705900 | 2.28858700  | H | -1.86409400 | 2.44441400  | -0.55807700 |
| C      | -0.37255400 | -2.14434300 | 0.98547700  | H | -3.09781400 | 3.18784800  | -1.58670000 |
| H      | -2.04037100 | -0.28466700 | 1.22395600  | C | -4.43498400 | 2.13624100  | 0.47477800  |
| C      | 1.61282900  | -0.16429500 | 4.58603700  | H | -3.70915300 | 2.41527500  | 1.24408600  |
| C      | 1.26302000  | 1.15491100  | 4.43507600  | H | -5.24886500 | 1.59323000  | 0.95810800  |
| C      | 1.10758900  | 1.37030400  | 3.03982600  | H | -4.85375900 | 3.06387800  | 0.06700200  |
| C      | 1.35314300  | 0.18258200  | 2.36047300  | C | -5.11633300 | -1.27856800 | 1.45187500  |
| N      | 1.67309300  | -0.73817300 | 3.34411800  | H | -4.47559500 | -1.39713500 | 2.32927800  |
| H      | 1.82388600  | -0.74998000 | 5.47032800  | H | -5.90619400 | -2.03654600 | 1.51746900  |
| H      | 1.13696500  | 1.87671300  | 5.23011200  | H | -5.59291200 | -0.29882800 | 1.51053300  |
| H      | 0.88498400  | 2.31857500  | 2.56785700  | C | -3.68221600 | -2.88787200 | 0.21101800  |
| C      | 2.09981700  | -2.11135600 | 3.15981500  | H | -3.10759800 | -3.09235600 | -0.69869700 |
| H      | 1.85718000  | -2.46047300 | 2.15808500  | H | -4.46819800 | -3.64733700 | 0.29901300  |
| H      | 3.18219400  | -2.20511100 | 3.30187100  | H | -3.01707500 | -2.98609900 | 1.07530800  |
| H      | 1.59152900  | -2.75642800 | 3.88127200  | C | 2.35732300  | -0.78088900 | -0.05879400 |
|        |             |             |             | C | 2.93690300  | -1.47802300 | -1.11218200 |
| P19_TS |             |             |             | F | 2.18849200  | -1.99330000 | -2.10462500 |
| B      | 0.76503000  | -0.37474200 | 0.12251300  | C | 4.30565100  | -1.70700900 | -1.22548100 |
| C      | 0.12655800  | -1.06357700 | 1.49161000  | F | 4.79387500  | -2.38850600 | -2.26342500 |
| C      | 0.90757800  | -2.00931200 | 2.17704600  | C | 5.16380100  | -1.22236000 | -0.25306600 |
| H      | 1.91796300  | -2.20110900 | 1.82988500  | F | 6.47524700  | -1.43319700 | -0.34422200 |
| C      | 0.45989200  | -2.75572500 | 3.26239000  | C | 4.63832600  | -0.51859800 | 0.82254800  |
| H      | 1.12262000  | -3.47477700 | 3.73427700  | F | 5.45096200  | -0.05218900 | 1.77111600  |
| C      | -0.83027300 | -2.56613000 | 3.73515700  | C | 3.26850100  | -0.31350500 | 0.89101600  |
| H      | -1.20629200 | -3.12668200 | 4.58513700  | F | 2.81861700  | 0.36434400  | 1.95766300  |

|       |             |             |             |   |             |             |             |
|-------|-------------|-------------|-------------|---|-------------|-------------|-------------|
| C     | 0.80965600  | 1.28503900  | 0.12291300  | H | -6.13687000 | -2.31456000 | -0.54281000 |
| C     | 0.53814100  | 2.11026000  | 1.21598300  | C | -6.12688700 | -0.25113800 | -1.21239000 |
| F     | 0.17860700  | 1.59923400  | 2.40128800  | H | -6.69149000 | 0.15344400  | -0.36427500 |
| C     | 0.61549500  | 3.49975100  | 1.18092700  | H | -6.86808100 | -0.49024800 | -1.98072200 |
| F     | 0.30579800  | 4.22133900  | 2.25869900  | C | -5.17049600 | 0.80537000  | -1.77189900 |
| C     | 1.04856600  | 4.13497600  | 0.02838300  | H | -5.73617500 | 1.66883400  | -2.14370700 |
| F     | 1.13759700  | 5.46138900  | -0.02200400 | H | -4.64078600 | 0.38258400  | -2.63688400 |
| C     | 1.41510200  | 3.36183000  | -1.06236400 | C | -4.12269900 | 1.34721900  | -0.77617600 |
| F     | 1.88600600  | 3.94623500  | -2.16460700 | C | -3.12894300 | 2.24099900  | -1.53363300 |
| C     | 1.31823000  | 1.97856000  | -0.97841100 | H | -2.64552500 | 1.70116400  | -2.34978800 |
| F     | 1.78468400  | 1.30901300  | -2.04764500 | H | -2.34882400 | 2.64127300  | -0.87811500 |
| C     | -0.11951000 | -0.89602000 | -1.19563400 | H | -3.68019800 | 3.09044500  | -1.95155600 |
| C     | -0.36827400 | -0.28779300 | -2.46389100 | C | -4.77477000 | 2.17300600  | 0.34069100  |
| C     | -0.89221700 | -1.21914900 | -3.34754100 | H | -4.02541100 | 2.59525000  | 1.01562200  |
| C     | -0.88755300 | -2.43624300 | -2.66571800 | H | -5.49504100 | 1.61172100  | 0.93781900  |
| N     | -0.40998100 | -2.26368000 | -1.42941600 | H | -5.30803100 | 3.01134100  | -0.11977700 |
| H     | -0.27267300 | 0.77176200  | -2.64494600 | C | -5.17442500 | -1.14144800 | 1.68196000  |
| H     | -1.23382000 | -1.05749400 | -4.35850700 | H | -4.48866500 | -1.01653800 | 2.52109600  |
| H     | -1.19245000 | -3.41791900 | -3.00532500 | H | -5.81405900 | -2.00200200 | 1.90513400  |
| C     | -0.16454500 | -3.36501200 | -0.51287700 | H | -5.81673200 | -0.26161300 | 1.62572200  |
| H     | -0.42023800 | -4.29398300 | -1.02470200 | C | -3.65198100 | -2.75185700 | 0.50461300  |
| H     | 0.89208400  | -3.38062300 | -0.23778900 | H | -3.08452200 | -2.96688700 | -0.40716800 |
| H     | -0.76159600 | -3.26412300 | 0.39413800  | H | -4.37543800 | -3.56086000 | 0.65456600  |
| H     | -1.35269400 | -0.53841100 | -0.89820600 | H | -2.96247900 | -2.74340300 | 1.35297000  |
| P     | -2.95650700 | -0.24560700 | -0.11741800 | C | 2.37317700  | -0.93386400 | -0.07106200 |
|       |             |             |             | C | 2.89604700  | -1.64729900 | -1.14451100 |
| P19_P |             |             |             | F | 2.11540700  | -2.04795700 | -2.16109000 |
| B     | 0.82924000  | -0.35089800 | 0.07377700  | C | 4.23572500  | -2.01144100 | -1.24786600 |
| C     | 0.10134200  | -0.96619300 | 1.42517600  | F | 4.67144300  | -2.70261800 | -2.30341300 |
| C     | 0.74463300  | -1.94782700 | 2.19721900  | C | 5.12382800  | -1.64997800 | -0.24881100 |
| H     | 1.73115700  | -2.28413800 | 1.89350900  | F | 6.40991900  | -1.98744500 | -0.33357400 |
| C     | 0.18343600  | -2.52824600 | 3.32976100  | C | 4.65576800  | -0.93609800 | 0.84544200  |
| H     | 0.73410800  | -3.28625700 | 3.87851200  | F | 5.49846800  | -0.58211900 | 1.81770500  |
| C     | -1.06544100 | -2.10946300 | 3.77279800  | C | 3.31208400  | -0.59554600 | 0.90448200  |
| H     | -1.50364000 | -2.51440000 | 4.67920000  | F | 2.92210800  | 0.09732600  | 1.98706600  |
| C     | -1.73502300 | -1.13859200 | 3.03984300  | C | 1.06733900  | 1.29717900  | 0.11204400  |
| H     | -2.68689400 | -0.76145900 | 3.40664800  | C | 0.79587500  | 2.16868800  | 1.16505100  |
| C     | -1.19103900 | -0.60623700 | 1.86575900  | F | 0.21084900  | 1.73612900  | 2.29546600  |
| C     | -2.01784000 | 0.44918500  | 1.15593100  | C | 1.07232500  | 3.53309900  | 1.13905900  |
| H     | -1.38353000 | 1.14345800  | 0.59710300  | F | 0.75154500  | 4.30851600  | 2.17802500  |
| H     | -2.59601900 | 1.03203500  | 1.88219500  | C | 1.68983500  | 4.08614100  | 0.03058200  |
| C     | -4.42434000 | -1.42832100 | 0.37746900  | F | 1.95969700  | 5.38979600  | -0.01603700 |
| C     | -5.40630400 | -1.54202300 | -0.81396900 | C | 2.01924600  | 3.26003500  | -1.03416100 |
| H     | -4.85665300 | -1.92480400 | -1.68558800 | F | 2.62649500  | 3.77155200  | -2.10610300 |

|        |             |             |             |   |             |             |             |
|--------|-------------|-------------|-------------|---|-------------|-------------|-------------|
| C      | 1.71901500  | 1.90613900  | -0.96505200 | C | 0.73797800  | -0.52867300 | -2.35167600 |
| F      | 2.10244500  | 1.17528200  | -2.02210100 | F | 0.98633800  | 0.66033100  | -2.92580500 |
| C      | -0.09305500 | -0.71017800 | -1.22109500 | F | -0.31718800 | -1.02074900 | -4.40959100 |
| C      | -0.54850700 | 0.07934100  | -2.26924900 | C | 3.44017000  | -0.49758800 | 0.34852000  |
| C      | -1.32678000 | -0.71546000 | -3.15197900 | C | 4.01534000  | -1.62804200 | -0.23055100 |
| C      | -1.33468900 | -1.98883800 | -2.62445800 | F | 3.41438400  | -2.29603500 | -1.22666400 |
| N      | -0.60336000 | -1.97476300 | -1.46238900 | C | 5.24470300  | -2.15857500 | 0.15686300  |
| H      | -0.31246000 | 1.12627600  | -2.39839400 | F | 5.72231800  | -3.25503100 | -0.43408600 |
| H      | -1.79988000 | -0.40770800 | -4.07455100 | C | 5.97946000  | -1.53920600 | 1.15226900  |
| H      | -1.76100900 | -2.91044000 | -2.99615700 | F | 7.15785900  | -2.02992900 | 1.53079800  |
| C      | -0.27171700 | -3.18181400 | -0.72369400 | C | 5.47391100  | -0.38772700 | 1.73842600  |
| H      | -0.58593800 | -4.04448900 | -1.31435600 | C | 4.24393100  | 0.10258700  | 1.32426900  |
| H      | 0.80742100  | -3.23763200 | -0.57135900 | F | 3.84698900  | 1.23583100  | 1.92068800  |
| H      | -0.76213500 | -3.20793000 | 0.25187700  | F | 6.17818600  | 0.24036700  | 2.68211400  |
| H      | -2.58183500 | -0.68333900 | -1.21813000 | C | -3.29200300 | -0.11228300 | 1.88455300  |
| P      | -3.21405800 | -0.11831400 | -0.10610400 | C | -2.94321100 | -0.30156200 | 3.23738100  |
| P21_TS |             |             |             | C | -1.52471500 | -0.16169400 | 3.71106100  |
| P      | -1.95369300 | 0.23215600  | 0.65984300  | C | -3.92935700 | -0.63617500 | 4.16076200  |
| C      | -2.18435500 | 1.99784700  | 0.26801900  | C | -5.26398500 | -0.78252100 | 3.78915100  |
| C      | -3.25411100 | 2.77361800  | 0.72388600  | C | -6.31139400 | -1.13933100 | 4.81005200  |
| C      | -3.29837300 | 4.13220000  | 0.43182200  | C | -5.59430400 | -0.56815900 | 2.45599800  |
| C      | -2.29206500 | 4.72380400  | -0.33109100 | C | -4.64156300 | -0.23567700 | 1.48851900  |
| C      | -1.20945500 | 3.98249900  | -0.80073800 | C | -5.14896800 | -0.03275900 | 0.07922600  |
| C      | -1.16794200 | 2.63107900  | -0.45304700 | C | -2.39311300 | -0.92197400 | -0.70655500 |
| O      | -0.13208100 | 1.84560000  | -0.83685000 | C | -2.73414800 | -0.56630200 | -2.02974700 |
| C      | 1.11595900  | 2.45670000  | -0.98675100 | C | -2.52912600 | 0.80317000  | -2.62549700 |
| C      | 2.20679600  | 1.64714600  | -0.66862500 | C | -3.26874300 | -1.54810400 | -2.86487100 |
| C      | 3.45028600  | 2.24905000  | -0.86675700 | C | -3.46699400 | -2.86323800 | -2.45116000 |
| C      | 3.57509300  | 3.57206900  | -1.29349800 | C | -4.02135900 | -3.89706200 | -3.39270700 |
| C      | 2.44743700  | 4.34251600  | -1.54017100 | C | -3.05518600 | -3.20735800 | -1.16796700 |
| C      | 1.17468000  | 3.78238800  | -1.39829600 | C | -2.50460700 | -2.26853700 | -0.29579100 |
| C      | -0.12792300 | 4.49803700  | -1.74519800 | C | -2.01828000 | -2.77467400 | 1.04375100  |
| C      | 0.00714200  | 6.01922700  | -1.67304800 | H | -4.04103900 | 2.31774900  | 1.31593700  |
| C      | -0.52078200 | 4.09190600  | -3.18363100 | H | -4.12606100 | 4.73326200  | 0.79188300  |
| B      | 1.96406700  | 0.16418800  | -0.00688400 | H | -2.35973900 | 5.78129100  | -0.56405200 |
| C      | 1.11001700  | -0.82596000 | -1.03822700 | H | 4.35427500  | 1.68061700  | -0.67120900 |
| C      | 0.78149900  | -2.12987100 | -0.67533400 | H | 4.56138100  | 4.00646400  | -1.42249600 |
| F      | 1.11651400  | -2.58113500 | 0.54947800  | H | 2.55788600  | 5.37477900  | -1.85435200 |
| C      | 0.16453900  | -3.06477700 | -1.48856900 | H | 0.77119700  | 6.36715200  | -2.37155300 |
| F      | -0.12902200 | -4.28656300 | -1.02914700 | H | 0.27697300  | 6.35162800  | -0.66645200 |
| C      | -0.20366000 | -2.70116200 | -2.77203400 | H | -0.92796000 | 6.50361800  | -1.96715700 |
| F      | -0.84189100 | -3.56006200 | -3.56734300 | H | 0.22805100  | 4.46558700  | -3.88854900 |
| C      | 0.08028900  | -1.41806300 | -3.19733600 | H | -0.55916100 | 3.00347000  | -3.28265600 |
|        |             |             |             | H | -1.49888100 | 4.50787300  | -3.44766400 |

|       |             |             |             |   |             |             |             |
|-------|-------------|-------------|-------------|---|-------------|-------------|-------------|
| H     | -1.47029600 | -0.21950600 | 4.80031700  | O | -0.15742600 | 1.84925500  | -0.60781600 |
| H     | -0.88901600 | -0.95525700 | 3.30310200  | C | 0.99912400  | 2.62617600  | -0.36017600 |
| H     | -1.08738100 | 0.79156900  | 3.40497900  | C | 2.04410200  | 2.02012200  | 0.33060900  |
| H     | -3.64473100 | -0.78498300 | 5.19993600  | C | 3.08748300  | 2.88836300  | 0.68950000  |
| H     | -6.42717300 | -0.33691100 | 5.54507100  | C | 3.11629600  | 4.22784100  | 0.33448500  |
| H     | -7.28213900 | -1.31041800 | 4.34057400  | C | 2.09317300  | 4.75453700  | -0.44873200 |
| H     | -6.03156500 | -2.04407000 | 5.35702900  | C | 1.02217500  | 3.94830800  | -0.82121900 |
| H     | -6.63299400 | -0.65895200 | 2.14680800  | C | -0.07206800 | 4.38869800  | -1.78227200 |
| H     | -6.20602600 | 0.24112600  | 0.11033200  | C | -0.13611700 | 5.90380400  | -1.96261400 |
| H     | -5.05308900 | -0.94988300 | -0.51136200 | C | 0.20975500  | 3.73718500  | -3.15629900 |
| H     | -4.61483800 | 0.75725500  | -0.45282200 | B | 2.11639600  | 0.48095500  | 0.87760200  |
| H     | -2.81696700 | 0.79181000  | -3.67821300 | C | 1.23344400  | -0.64694000 | 0.02154600  |
| H     | -1.47491600 | 1.08838700  | -2.57167400 | C | 0.73732100  | -1.83415200 | 0.56333000  |
| H     | -3.11610500 | 1.57801300  | -2.12306600 | F | 0.54372300  | -1.97979300 | 1.88522700  |
| H     | -3.52982200 | -1.27202300 | -3.88348600 | C | 0.43109800  | -2.95838100 | -0.19831400 |
| H     | -4.58149300 | -4.66509200 | -2.85430800 | F | -0.02235400 | -4.07593400 | 0.38407900  |
| H     | -3.20109200 | -4.38907200 | -3.92385800 | C | 0.55070800  | -2.91482800 | -1.57542600 |
| H     | -4.67995000 | -3.44363200 | -4.13697500 | F | 0.25717400  | -3.98718600 | -2.31587300 |
| H     | -3.13292600 | -4.24081800 | -0.83785300 | C | 0.93955600  | -1.72778800 | -2.17357800 |
| H     | -1.62452500 | -3.78560700 | 0.91975200  | C | 1.27965300  | -0.64586800 | -1.37460800 |
| H     | -1.20154400 | -2.16605900 | 1.44450100  | F | 1.73376900  | 0.43392200  | -2.03641400 |
| H     | -2.82146300 | -2.79734800 | 1.78751400  | F | 0.97791800  | -1.63680300 | -3.50781800 |
| C     | 1.54523900  | 0.61732900  | 3.76547800  | C | 3.62327100  | -0.18340900 | 0.60727200  |
| C     | 1.18812700  | 1.88988300  | 3.35298400  | C | 4.53535400  | 0.21676600  | -0.36993100 |
| C     | 0.98444700  | 1.79650000  | 1.97913400  | F | 4.31588600  | 1.28424100  | -1.14945400 |
| C     | 1.19209800  | 0.46537100  | 1.51526800  | C | 5.72826800  | -0.45219500 | -0.63463800 |
| N     | 1.54403300  | -0.22068100 | 2.71082700  | F | 6.56136000  | 0.00186600  | -1.57632500 |
| H     | 1.77447800  | 0.24703400  | 4.75620100  | C | 6.04557100  | -1.60372100 | 0.06197700  |
| H     | 1.10551700  | 2.76654400  | 3.97763100  | F | 7.18279600  | -2.25638200 | -0.18391500 |
| H     | 0.74425000  | 2.63551600  | 1.34393200  | C | 5.15359200  | -2.07383500 | 1.01362200  |
| C     | 1.85686500  | -1.62956800 | 2.90117300  | C | 3.97765600  | -1.37619100 | 1.24003300  |
| H     | 2.27938600  | -1.74546700 | 3.90006000  | F | 3.14252700  | -1.92520700 | 2.14043500  |
| H     | 0.95911500  | -2.24702900 | 2.81826900  | F | 5.42358600  | -3.19892200 | 1.68327800  |
| H     | 2.58096400  | -1.96830000 | 2.16367400  | C | -4.10374300 | -0.10182900 | 1.06268500  |
| H     | -0.33519000 | 0.21330200  | 1.18592600  | C | -4.12797700 | 0.07315700  | 2.46140900  |
|       |             |             |             | C | -2.92240800 | 0.52112000  | 3.24551300  |
| P21-P |             |             |             | C | -5.31916000 | -0.17472900 | 3.14126800  |
| P     | -2.53316700 | 0.13676800  | 0.18205000  | C | -6.47748900 | -0.57462000 | 2.47856600  |
| C     | -2.51984500 | 1.84220900  | -0.40368100 | C | -7.74088500 | -0.87164300 | 3.23844500  |
| C     | -3.74478600 | 2.51798100  | -0.50422900 | C | -6.43440400 | -0.69927400 | 1.09066400  |
| C     | -3.78654500 | 3.82506300  | -0.95892300 | C | -5.27079200 | -0.47029500 | 0.35757500  |
| C     | -2.60586800 | 4.45814000  | -1.34014400 | C | -5.35020600 | -0.62227400 | -1.14474900 |
| C     | -1.37554200 | 3.81444200  | -1.25725400 | C | -2.36772700 | -1.20650700 | -1.02344400 |
| C     | -1.33289800 | 2.51039500  | -0.74455200 | C | -2.17861200 | -1.01105600 | -2.40684400 |

|   |             |             |             |        |             |             |             |
|---|-------------|-------------|-------------|--------|-------------|-------------|-------------|
| C | -1.83449600 | 0.31446100  | -3.03794200 | C      | 1.64499300  | 0.63856400  | 2.43048400  |
| C | -2.26524800 | -2.12406800 | -3.24321300 | N      | 2.35663000  | 0.58600600  | 3.61219600  |
| C | -2.51830400 | -3.40555400 | -2.75837800 | H      | 1.94913900  | 0.93057300  | 5.67868000  |
| C | -2.56354100 | -4.58651300 | -3.68589000 | H      | -0.54787000 | 1.54220600  | 4.78416000  |
| C | -2.63410300 | -3.57735300 | -1.38027500 | H      | -0.39627700 | 1.30922600  | 2.06629700  |
| C | -2.55404500 | -2.50622400 | -0.49360800 | C      | 3.77034900  | 0.31613400  | 3.80430700  |
| C | -2.64026300 | -2.81080100 | 0.98444900  | H      | 4.34485400  | 0.69110700  | 2.95712500  |
| H | -4.66233000 | 2.02229700  | -0.20799500 | H      | 4.10424500  | 0.84505400  | 4.69913200  |
| H | -4.73447400 | 4.34710300  | -1.02370300 | H      | 3.97020900  | -0.75077800 | 3.92905400  |
| H | -2.64943600 | 5.47382800  | -1.71784800 | H      | -1.49354300 | -0.00274400 | 1.11152800  |
| H | 3.91445100  | 2.48185700  | 1.26961000  |        |             |             |             |
| H | 3.94536900  | 4.85821600  | 0.64104100  | P22-TS |             |             |             |
| H | 2.13461400  | 5.78957900  | -0.76894500 | P      | 2.34804800  | 0.78462100  | 1.60023500  |
| H | 0.81497100  | 6.27696700  | -2.34908500 | C      | 3.37575200  | -0.47191700 | 0.78441600  |
| H | -0.35617500 | 6.41972400  | -1.02295000 | C      | 4.64682300  | -0.88637700 | 1.19125400  |
| H | -0.89901800 | 6.17194900  | -2.69902000 | C      | 5.31685300  | -1.87222800 | 0.47362300  |
| H | 1.13530400  | 4.14497700  | -3.57425000 | C      | 4.73725800  | -2.43329300 | -0.66513800 |
| H | 0.33869500  | 2.65462600  | -3.06254100 | C      | 3.48315900  | -2.02177600 | -1.11458300 |
| H | -0.61190200 | 3.93745800  | -3.85259400 | C      | 2.82350400  | -1.04982800 | -0.36169200 |
| H | -3.19807100 | 0.70491300  | 4.28549500  | O      | 1.57929100  | -0.61741500 | -0.71851300 |
| H | -2.12044800 | -0.22595700 | 3.24691400  | C      | 0.73029800  | -1.55753500 | -1.30039300 |
| H | -2.50245900 | 1.45049900  | 2.84544000  | C      | -0.62403400 | -1.43669600 | -0.98524800 |
| H | -5.33994500 | -0.04280900 | 4.21988600  | C      | -1.44266100 | -2.40519600 | -1.58124300 |
| H | -8.62612600 | -0.61318600 | 2.65232300  | C      | -0.93119600 | -3.43009100 | -2.37292400 |
| H | -7.80167000 | -1.93928100 | 3.47522300  | C      | 0.43430400  | -3.51138400 | -2.62820800 |
| H | -7.77537400 | -0.32101500 | 4.18121600  | C      | 1.29648400  | -2.54990500 | -2.10313300 |
| H | -7.33912800 | -0.97635900 | 0.55492700  | C      | 2.79484800  | -2.47678000 | -2.39620500 |
| H | -6.38801200 | -0.50883100 | -1.46557200 | C      | 3.02019300  | -1.38303000 | -3.46496800 |
| H | -5.00439900 | -1.60921300 | -1.46869500 | C      | 3.35591500  | -3.80051300 | -2.91184600 |
| H | -4.75860700 | 0.12384200  | -1.68361300 | B      | -1.17117800 | -0.23648600 | -0.00186500 |
| H | -1.65620400 | 0.17577200  | -4.10577100 | C      | -0.74499200 | 1.22376500  | -0.67727100 |
| H | -0.91795200 | 0.72320400  | -2.60087700 | C      | -0.84424800 | 1.38052800  | -2.06478100 |
| H | -2.62815000 | 1.05957100  | -2.92451000 | F      | -1.33685000 | 0.39176000  | -2.82420900 |
| H | -2.11225900 | -1.98185900 | -4.30987400 | C      | -0.52071200 | 2.54014800  | -2.75431900 |
| H | -3.22502400 | -5.36754100 | -3.30368800 | F      | -0.64318400 | 2.59862300  | -4.08209700 |
| H | -1.56057800 | -5.01472600 | -3.78292500 | C      | -0.08913000 | 3.65683000  | -2.05485200 |
| H | -2.90234900 | -4.29811500 | -4.68361000 | F      | 0.24102200  | 4.77846100  | -2.69476100 |
| H | -2.76318900 | -4.57800000 | -0.97532400 | C      | -0.01334400 | 3.57751000  | -0.67878600 |
| H | -2.37680500 | -3.85553300 | 1.15298200  | C      | -0.33767300 | 2.38754500  | -0.03483800 |
| H | -1.93936000 | -2.21269100 | 1.57775000  | F      | -0.20225100 | 2.45446900  | 1.31002400  |
| H | -3.64768300 | -2.64695200 | 1.37774000  | F      | 0.43149200  | 4.62255100  | 0.03066900  |
| C | 1.55117900  | 0.92332900  | 4.67378800  | C      | -2.82597300 | -0.32878000 | 0.11897600  |
| C | 0.30094000  | 1.22308100  | 4.19383300  | C      | -3.75219400 | 0.62986400  | -0.28169100 |
| C | 0.37101400  | 1.05690700  | 2.78662000  | F      | -3.37700000 | 1.77400700  | -0.88019300 |

|   |             |             |             |       |             |             |             |
|---|-------------|-------------|-------------|-------|-------------|-------------|-------------|
| C | -5.12703100 | 0.50855300  | -0.09182200 | C     | -0.59585500 | -1.61519600 | 3.49862400  |
| F | -5.95115900 | 1.47894100  | -0.49690200 | N     | -0.26688800 | -1.61899700 | 2.19833900  |
| C | -5.64194100 | -0.61929700 | 0.51886400  | H     | -1.66992000 | 1.31426000  | 2.52526800  |
| F | -6.95509700 | -0.75262800 | 0.70710200  | H     | -1.58383400 | -0.12330400 | 4.79477600  |
| C | -4.76638500 | -1.61239000 | 0.93269300  | H     | -0.35448700 | -2.46227100 | 4.12772500  |
| C | -3.40628500 | -1.44328700 | 0.72895200  | C     | 0.38929100  | -2.76236300 | 1.58573600  |
| F | -2.62700200 | -2.45525000 | 1.15490800  | H     | 0.56771200  | -3.50652500 | 2.36323000  |
| F | -5.24017400 | -2.71441400 | 1.52146300  | H     | -0.24095000 | -3.19475500 | 0.80810500  |
| C | 2.91880700  | 0.89346600  | 3.35181100  | H     | 1.35130500  | -2.47330200 | 1.15730000  |
| C | 2.72501200  | -0.43912200 | 4.07613200  |       |             |             |             |
| C | 2.13297700  | 2.01024000  | 4.04819000  | P22-P |             |             |             |
| C | 2.85510400  | 2.38066500  | 0.77142200  | P     | -2.95605400 | -1.18496700 | -1.31600800 |
| C | 4.20757900  | 2.88362900  | 1.28244400  | C     | -3.55600200 | -0.83997900 | 0.33936900  |
| C | 2.91155000  | 2.21714400  | -0.75358000 | C     | -4.86307400 | -1.19643400 | 0.69515700  |
| H | 5.10323700  | -0.45528000 | 2.07789300  | C     | -5.37798400 | -0.81230200 | 1.92336600  |
| H | 6.29679900  | -2.20502500 | 0.79858400  | C     | -4.60850000 | -0.01936900 | 2.77266700  |
| H | 5.28002100  | -3.19800400 | -1.21120200 | C     | -3.32128100 | 0.38619400  | 2.42974400  |
| H | -2.51602800 | -2.36368600 | -1.42421400 | C     | -2.78082100 | -0.07070300 | 1.22061700  |
| H | -1.60332400 | -4.16831900 | -2.79954500 | O     | -1.51013000 | 0.24576900  | 0.84650500  |
| H | 0.82004300  | -4.31476600 | -3.24685800 | C     | -0.57495000 | 0.51167100  | 1.86755500  |
| H | 2.50814800  | -1.65704700 | -4.39240200 | C     | 0.77217000  | 0.25943300  | 1.57822900  |
| H | 4.08904900  | -1.26555000 | -3.67205400 | C     | 1.65542000  | 0.52103800  | 2.63538300  |
| H | 2.62414800  | -0.41931300 | -3.12972200 | C     | 1.23193600  | 0.96002300  | 3.88446900  |
| H | 2.86791800  | -4.08043700 | -3.84871700 | C     | -0.11557400 | 1.20496900  | 4.11162100  |
| H | 4.42371900  | -3.70725100 | -3.12858800 | C     | -1.04252500 | 1.00481800  | 3.08940300  |
| H | 3.21512900  | -4.61138400 | -2.19061100 | C     | -2.50688600 | 1.40365400  | 3.20877500  |
| H | 3.98600300  | 1.14561200  | 3.33961900  | C     | -2.68840200 | 2.76902600  | 2.50615100  |
| H | 3.12552400  | -0.36379700 | 5.09200100  | C     | -2.97239100 | 1.53308000  | 4.65836300  |
| H | 3.23054700  | -1.26864000 | 3.57335100  | B     | 1.31919600  | -0.15941500 | 0.08315700  |
| H | 1.66004500  | -0.67911200 | 4.15393700  | C     | 1.08058200  | 1.23983100  | -0.78068900 |
| H | 2.46658400  | 2.10487600  | 5.08609000  | C     | 1.77734500  | 2.39194700  | -0.40213900 |
| H | 1.06346600  | 1.77405200  | 4.05788100  | F     | 2.72262900  | 2.31354400  | 0.54685300  |
| H | 2.26092800  | 2.98306200  | 3.56424800  | C     | 1.58658700  | 3.64717900  | -0.95599400 |
| H | 2.07274900  | 3.10131000  | 1.03217900  | F     | 2.29722400  | 4.69732600  | -0.53573200 |
| H | 4.49609000  | 3.77158200  | 0.71092600  | C     | 0.64050900  | 3.81445000  | -1.95873600 |
| H | 4.18888000  | 3.16353000  | 2.33847900  | F     | 0.42684500  | 5.01437900  | -2.50069800 |
| H | 4.98770300  | 2.12828500  | 1.13302600  | C     | -0.07299100 | 2.71053700  | -2.38108000 |
| H | 3.01388000  | 3.20700100  | -1.21056800 | C     | 0.16097500  | 1.47007200  | -1.79230100 |
| H | 3.78836700  | 1.62602600  | -1.03917800 | F     | -0.61215300 | 0.47925200  | -2.28777600 |
| H | 2.02454200  | 1.73498400  | -1.16988800 | F     | -1.00316500 | 2.83334500  | -3.33864900 |
| H | 0.72233600  | 0.26350700  | 1.56114100  | C     | 2.93945000  | -0.55282400 | 0.12860600  |
| C | -0.61823600 | -0.39023200 | 1.58595900  | C     | 3.93553100  | -0.05758600 | -0.70899200 |
| C | -1.23805400 | 0.33092000  | 2.64386000  | F     | 3.67658900  | 0.90118800  | -1.61659900 |
| C | -1.21167700 | -0.40752600 | 3.82111700  | C     | 5.25225400  | -0.50634200 | -0.70554600 |

|   |             |             |             |        |             |             |             |
|---|-------------|-------------|-------------|--------|-------------|-------------|-------------|
| F | 6.15131700  | 0.02671300  | -1.53924100 | N      | 0.14406000  | -2.59799900 | 0.02273800  |
| C | 5.63369500  | -1.51371700 | 0.16224800  | H      | 1.31495100  | -1.24076800 | -2.69153300 |
| F | 6.89155200  | -1.95945900 | 0.18024200  | H      | 0.50920800  | -3.82208700 | -2.99344300 |
| C | 4.68148400  | -2.05653600 | 1.00987400  | H      | -0.35369900 | -4.59834900 | -0.52602800 |
| C | 3.38038100  | -1.57818700 | 0.96490500  | C      | -0.33700200 | -2.70501700 | 1.39000100  |
| F | 2.51807600  | -2.18013400 | 1.80620000  | H      | 0.27580100  | -2.10835900 | 2.05927600  |
| F | 5.02197700  | -3.03610100 | 1.85398100  | H      | -1.38073700 | -2.37708100 | 1.47138800  |
| C | -3.71556800 | -2.71718100 | -1.96889500 | H      | -0.27659200 | -3.75071400 | 1.69937000  |
| C | -3.55290900 | -3.89349400 | -1.00578600 |        |             |             |             |
| C | -3.09714600 | -3.01727800 | -3.33930600 | P23_TS |             |             |             |
| C | -3.43366600 | 0.24871100  | -2.37874900 | C      | 1.44286100  | -2.19281000 | 2.03961300  |
| C | -4.87123100 | 0.09797000  | -2.88158100 | H      | 2.31329000  | -1.83328600 | 2.59883600  |
| C | -3.27359400 | 1.56122300  | -1.60238500 | H      | 1.65114700  | -3.22076400 | 1.72524000  |
| H | -5.47080100 | -1.78600900 | 0.01477600  | H      | 0.59547400  | -2.20955400 | 2.72580500  |
| H | -6.38086500 | -1.10675400 | 2.21132100  | C      | 1.18356500  | -1.28847900 | 0.85804800  |
| H | -5.03506800 | 0.30686500  | 3.71494500  | C      | 0.00319200  | -0.72455200 | 0.50862300  |
| H | 2.71867600  | 0.38100200  | 2.46942100  | P      | 2.64788000  | -0.86310000 | -0.11855000 |
| H | 1.95598800  | 1.12815000  | 4.67558900  | C      | 3.88914500  | -0.10502700 | 0.97231300  |
| H | -0.44337400 | 1.56836400  | 5.07907900  | C      | 4.75164800  | -0.87515600 | 1.76252400  |
| H | -2.09121800 | 3.53187200  | 3.01491700  | H      | 4.73716500  | -1.95901700 | 1.68680800  |
| H | -3.74085700 | 3.07182200  | 2.52630500  | C      | 5.62882500  | -0.24868300 | 2.64197800  |
| H | -2.36012000 | 2.72126100  | 1.46293400  | H      | 6.29611800  | -0.84806500 | 3.25255900  |
| H | -2.39795000 | 2.30587000  | 5.17368800  | C      | 5.64223100  | 1.14065000  | 2.74759400  |
| H | -4.01849800 | 1.84748000  | 4.69968200  | H      | 6.32106700  | 1.62298900  | 3.44334500  |
| H | -2.86504300 | 0.59264500  | 5.20728000  | C      | 4.78702400  | 1.91007100  | 1.96320500  |
| H | -4.78086500 | -2.48678100 | -2.09037500 | H      | 4.78592300  | 2.99147000  | 2.04756800  |
| H | -4.02418600 | -4.77730300 | -1.44561900 | C      | 3.92111600  | 1.28864400  | 1.07054600  |
| H | -4.01512000 | -3.70914000 | -0.03334300 | H      | 3.26310000  | 1.88976400  | 0.44958600  |
| H | -2.49450800 | -4.11455100 | -0.85072500 | C      | 3.31355800  | -2.43653500 | -0.72968400 |
| H | -3.58167300 | -3.89994200 | -3.76580300 | C      | 4.65627400  | -2.55183600 | -1.10747900 |
| H | -2.02864400 | -3.22777100 | -3.23396500 | H      | 5.33938100  | -1.72122000 | -0.95092600 |
| H | -3.21880400 | -2.19270700 | -4.04832700 | C      | 5.11940600  | -3.73271500 | -1.67618800 |
| H | -2.73051700 | 0.23431000  | -3.21682100 | H      | 6.16287600  | -3.82005100 | -1.96073600 |
| H | -5.14530400 | 1.00454900  | -3.42839100 | C      | 4.24608500  | -4.79919100 | -1.88238100 |
| H | -5.00077600 | -0.74943000 | -3.55936200 | H      | 4.61063400  | -5.71992600 | -2.32616600 |
| H | -5.57521100 | -0.00462200 | -2.04757600 | C      | 2.90791100  | -4.68432900 | -1.51782200 |
| H | -3.36483300 | 2.39632600  | -2.30081500 | H      | 2.22564100  | -5.51300800 | -1.67585800 |
| H | -4.06269500 | 1.65708400  | -0.84975800 | C      | 2.43736400  | -3.50731300 | -0.94246400 |
| H | -2.30831500 | 1.64190900  | -1.09884700 | H      | 1.39431700  | -3.42147000 | -0.64690600 |
| H | -1.55533200 | -1.32721100 | -1.27992000 | B      | -0.32493400 | 0.42394200  | -0.67862000 |
| C | 0.67875700  | -1.48762300 | -0.61187500 | C      | -1.17583300 | -1.16515300 | 1.31576200  |
| C | 0.87413100  | -1.87586500 | -1.93337000 | F      | -0.81316800 | -3.43540400 | 0.74769400  |
| C | 0.45789400  | -3.21897200 | -2.09695300 | C      | -1.55615400 | -2.50603500 | 1.35933700  |
| C | 0.01112800  | -3.63792300 | -0.86269300 | F      | -3.02697000 | -4.22578700 | 2.03081400  |

|       |             |             |             |   |             |             |             |
|-------|-------------|-------------|-------------|---|-------------|-------------|-------------|
| C     | -2.70344800 | -2.93518200 | 2.01049900  | C | 1.55653900  | -1.97834700 | 2.02261700  |
| F     | -4.61236900 | -2.40334600 | 3.28102100  | H | 0.66138700  | -2.22006000 | 2.59400500  |
| C     | -3.51444900 | -2.00655700 | 2.64797800  | H | 2.21695300  | -1.40807800 | 2.68570600  |
| F     | -3.94489700 | 0.23232800  | 3.23103200  | H | 2.06464200  | -2.91654200 | 1.77486200  |
| C     | -3.17092500 | -0.66141100 | 2.62221400  | C | 1.22236300  | -1.15599900 | 0.79451900  |
| F     | -1.74082600 | 1.04250000  | 1.93386000  | C | 0.00769400  | -0.67435800 | 0.45235400  |
| C     | -2.01640000 | -0.26279400 | 1.96345400  | P | 2.73954700  | -0.73785200 | -0.09605100 |
| C     | 0.10067300  | 1.92975100  | -0.16349600 | C | 3.91679500  | 0.06406100  | 1.01959600  |
| F     | 1.03779600  | 1.35647800  | 1.96078100  | C | 4.75071900  | -0.67171600 | 1.86832400  |
| C     | 0.74991800  | 2.26891500  | 1.02044900  | H | 4.74858700  | -1.75795400 | 1.83252400  |
| F     | 1.84902000  | 3.79777900  | 2.45333300  | C | 5.59220400  | -0.00472200 | 2.75239400  |
| C     | 1.17792600  | 3.56157300  | 1.32288300  | H | 6.24193800  | -0.57410200 | 3.40868600  |
| F     | 1.33190200  | 5.83395700  | 0.71213000  | C | 5.59827100  | 1.38811500  | 2.79626000  |
| C     | 0.91958300  | 4.59822300  | 0.44347400  | H | 6.25255200  | 1.90343300  | 3.49214800  |
| F     | -0.00823700 | 5.29397100  | -1.61276300 | C | 4.77146500  | 2.12201300  | 1.94909900  |
| C     | 0.22922000  | 4.32256400  | -0.72972500 | H | 4.77226000  | 3.20619400  | 1.98376500  |
| F     | -0.78802900 | 2.81949400  | -2.16129800 | C | 3.93494600  | 1.46176900  | 1.05639700  |
| C     | -0.16134100 | 3.02157500  | -0.98984600 | H | 3.29894200  | 2.03742400  | 0.38760900  |
| C     | -1.96410100 | 0.33331500  | -0.99252400 | C | 3.49872600  | -2.25395000 | -0.72094200 |
| F     | -2.59103500 | 2.56112000  | -0.35505300 | C | 4.83352800  | -2.23170900 | -1.13465700 |
| C     | -2.91311900 | 1.34582300  | -0.81774800 | H | 5.42452100  | -1.32481100 | -1.03851700 |
| F     | -5.10652300 | 2.21744100  | -0.87558500 | C | 5.40229400  | -3.38056200 | -1.67434800 |
| C     | -4.27770800 | 1.18878700  | -1.05033400 | H | 6.43671300  | -3.36692000 | -2.00097100 |
| F     | -6.08268400 | -0.20381200 | -1.65806300 | C | 4.64447700  | -4.54344900 | -1.79306600 |
| C     | -4.78107000 | -0.03861000 | -1.44143800 | H | 5.09136000  | -5.43851500 | -2.21386200 |
| F     | -4.35062300 | -2.31170100 | -1.89415500 | C | 3.31588300  | -4.56411600 | -1.37366900 |
| C     | -3.89920600 | -1.09871000 | -1.57287200 | H | 2.72804100  | -5.47120400 | -1.46610600 |
| F     | -1.80213100 | -2.01248900 | -1.38508400 | C | 2.73579800  | -3.41882400 | -0.83879600 |
| C     | -2.54780100 | -0.88834300 | -1.34052200 | H | 1.69538000  | -3.42437300 | -0.52415600 |
| H     | 1.75860900  | -0.18740800 | -1.29763200 | B | -0.40684600 | 0.42162500  | -0.75901100 |
| C     | 0.58872200  | 0.03988000  | -2.06131600 | C | -1.12874800 | -1.19192000 | 1.27255800  |
| C     | 0.47491500  | -1.20000200 | -2.74146800 | F | -0.65622000 | -3.42675300 | 0.64912100  |
| C     | 1.05024200  | -1.11770700 | -4.00677500 | C | -1.44645700 | -2.54908600 | 1.27828700  |
| C     | 1.53514200  | 0.17350000  | -4.12285800 | F | -2.83576400 | -4.35148300 | 1.90680100  |
| N     | 1.25351000  | 0.87515800  | -3.00563000 | C | -2.57000800 | -3.04648200 | 1.92144000  |
| H     | 0.02304600  | -2.07866000 | -2.31315000 | F | -4.49674200 | -2.63794900 | 3.21046800  |
| H     | 1.13201000  | -1.89763500 | -4.74867200 | C | -3.41920600 | -2.17372500 | 2.58593600  |
| H     | 2.10441000  | 0.63067000  | -4.92105100 | F | -3.94691400 | 0.02670700  | 3.23503400  |
| C     | 1.91752100  | 2.15569200  | -2.78031000 | C | -3.13515600 | -0.81522000 | 2.59972500  |
| H     | 2.80382300  | 2.19770900  | -3.41459600 | F | -1.78182100 | 0.96969000  | 1.95238100  |
| H     | 1.26252200  | 2.99260500  | -3.02115800 | C | -2.00464200 | -0.34650900 | 1.94721000  |
| H     | 2.23525700  | 2.23179200  | -1.73957000 | C | -0.08221500 | 1.96551600  | -0.25544200 |
|       |             |             |             | F | 1.05662900  | 1.46911100  | 1.79373600  |
| P23-P |             |             |             | C | 0.62892400  | 2.35530700  | 0.87571100  |



|        |             |             |             |   |             |             |             |
|--------|-------------|-------------|-------------|---|-------------|-------------|-------------|
| F      | 1.71369100  | 3.95734500  | 2.23852400  | H | -4.13612600 | 3.43790300  | 3.64166000  |
| C      | 0.97817600  | 3.67525200  | 1.15808100  | C | -3.20092900 | 2.09709600  | 2.25742500  |
| F      | 0.88703100  | 5.95902800  | 0.57250900  | C | -4.01384600 | 1.88157500  | -1.50346200 |
| C      | 0.56126500  | 4.69263700  | 0.32016200  | H | -4.45572400 | 2.68322100  | -2.09919200 |
| F      | -0.60830600 | 5.32763000  | -1.62701000 | H | -4.62690700 | 0.98226100  | -1.62350800 |
| C      | -0.20101200 | 4.36752500  | -0.79379700 | H | -3.02828100 | 1.67221700  | -1.91753800 |
| F      | -1.20396600 | 2.79996400  | -2.16087700 | C | -5.80081300 | 4.89424100  | 2.03991800  |
| C      | -0.49919700 | 3.03967400  | -1.04135100 | H | -5.54577200 | 5.80862400  | 1.49600500  |
| C      | -2.05582300 | 0.23022000  | -1.01650600 | H | -5.74859600 | 5.10884400  | 3.10910000  |
| F      | -2.82665900 | 2.35981800  | -0.21716400 | H | -6.83684300 | 4.64594800  | 1.79138600  |
| C      | -3.07194700 | 1.15393500  | -0.75318400 | C | -2.44904000 | 1.47683500  | 3.41141400  |
| F      | -5.32478800 | 1.86501500  | -0.69556500 | H | -1.62675800 | 2.12105500  | 3.73330000  |
| C      | -4.42753800 | 0.91273300  | -0.96112000 | H | -2.02360300 | 0.49871000  | 3.19187900  |
| F      | -6.14493300 | -0.57195800 | -1.61061400 | H | -3.12756900 | 1.36301100  | 4.26144200  |
| C      | -4.85115300 | -0.32113400 | -1.41826100 | C | -2.95695900 | -0.84291600 | -0.47646800 |
| F      | -4.27234400 | -2.52421500 | -2.02093800 | C | -2.83627500 | -1.20099100 | -1.83557600 |
| C      | -3.89840200 | -1.30138200 | -1.63543300 | C | -3.69932300 | -2.16858800 | -2.35740000 |
| F      | -1.73701400 | -2.06541900 | -1.55298500 | H | -3.58548500 | -2.44652100 | -3.40328800 |
| C      | -2.55909300 | -1.00730200 | -1.42429300 | C | -4.66242400 | -2.80975200 | -1.58819500 |
| H      | 2.58933900  | 0.18932700  | -1.12907900 | C | -4.76345800 | -2.44616100 | -0.24879900 |
| C      | 0.50271300  | 0.03275100  | -2.08636100 | H | -5.49629100 | -2.94185800 | 0.38312700  |
| C      | 0.76891100  | -1.27413900 | -2.49234500 | C | -3.93460000 | -1.48413500 | 0.32506500  |
| C      | 1.77931500  | -1.28438300 | -3.48053500 | C | -1.83870600 | -0.61494800 | -2.80308700 |
| C      | 2.13347500  | 0.02441600  | -3.67484400 | H | -1.62017700 | -1.34412100 | -3.58764500 |
| N      | 1.37109300  | 0.81943100  | -2.85077700 | H | -0.89536100 | -0.35499100 | -2.33003900 |
| H      | 0.29903300  | -2.14943900 | -2.07588100 | H | -2.23658700 | 0.28479000  | -3.28566500 |
| H      | 2.20385000  | -2.14545900 | -3.97774900 | C | -5.51702400 | -3.90373800 | -2.16832600 |
| H      | 2.84420100  | 0.47226200  | -4.35461800 | H | -4.98469600 | -4.85839800 | -2.11217200 |
| C      | 1.60424200  | 2.25699300  | -2.86639300 | H | -5.74688300 | -3.71210700 | -3.21914400 |
| H      | 2.39886200  | 2.45432200  | -3.58669300 | H | -6.45646300 | -4.00858500 | -1.62103100 |
| H      | 0.71621300  | 2.80167000  | -3.18229700 | C | -4.12400100 | -1.20420400 | 1.79770900  |
| H      | 1.93291600  | 2.62438600  | -1.89085300 | H | -4.62589600 | -0.24614000 | 1.96495800  |
|        |             |             |             | H | -3.17219700 | -1.18416800 | 2.33284600  |
| P24_TS |             |             |             | H | -4.73385100 | -1.99133000 | 2.24487200  |
| P      | -1.90514400 | 0.37746900  | 0.43314800  | C | -0.73654500 | 2.38738200  | -1.33526100 |
| B      | 1.00238500  | -0.73433300 | 0.62426900  | C | -1.24764000 | 3.57102100  | -0.78818100 |
| C      | -0.51315100 | 1.16198500  | -0.50781500 | H | -1.46412200 | 3.62441900  | 0.27350700  |
| C      | 0.71896700  | 0.61883400  | -0.30803600 | C | -1.46539700 | 4.68640400  | -1.59022300 |
| C      | -3.10216100 | 1.69625200  | 0.90974100  | H | -1.86599500 | 5.59251000  | -1.14701600 |
| C      | -3.95260100 | 2.29790500  | -0.05558900 | C | -1.16377400 | 4.64646800  | -2.94849100 |
| C      | -4.80527500 | 3.32257200  | 0.34017600  | H | -1.33837200 | 5.51721500  | -3.57237000 |
| H      | -5.44064900 | 3.78766800  | -0.41040000 | C | -0.61783200 | 3.48932200  | -3.49736900 |
| C      | -4.87372800 | 3.77082100  | 1.65952500  | H | -0.35600500 | 3.45409900  | -4.55001700 |
| C      | -4.07745300 | 3.13384800  | 2.59877200  | C | -0.40254400 | 2.37284800  | -2.69675600 |

|   |             |             |             |       |             |             |             |
|---|-------------|-------------|-------------|-------|-------------|-------------|-------------|
| H | 0.03501500  | 1.47598600  | -3.12571500 | H     | 2.18362300  | -2.62196300 | 3.72500000  |
| C | 1.88488700  | 1.43067500  | -0.79476300 | H     | 0.44550300  | -3.02760200 | 3.83611500  |
| C | 2.09296900  | 2.73414600  | -0.32952700 | H     | 1.22801000  | -2.84015800 | 2.25571200  |
| F | 1.23748600  | 3.30318700  | 0.52718200  |       |             |             |             |
| C | 3.19410600  | 3.49779000  | -0.68145900 | P24_P |             |             |             |
| F | 3.33900900  | 4.72914100  | -0.19697100 | P     | -2.05299600 | 0.37144100  | 0.29303100  |
| C | 4.15543900  | 2.96880300  | -1.52982900 | B     | 1.10480100  | -0.71991600 | 0.78179500  |
| F | 5.21565900  | 3.68949300  | -1.87682800 | C     | -0.53516900 | 1.15560100  | -0.37661600 |
| C | 3.99350100  | 1.67964000  | -2.00906000 | C     | 0.69939700  | 0.64674400  | -0.11002900 |
| F | 4.90281700  | 1.15351100  | -2.82633200 | C     | -3.29542600 | 1.62043000  | 0.77111000  |
| C | 2.87929800  | 0.93544300  | -1.63835700 | C     | -4.10028200 | 2.22800200  | -0.21645800 |
| F | 2.79821100  | -0.29301600 | -2.14254300 | C     | -5.01917100 | 3.20008800  | 0.17520900  |
| C | 0.03579600  | -2.00241900 | 0.12884900  | H     | -5.62423600 | 3.67949400  | -0.59012900 |
| C | 0.10622200  | -2.45450700 | -1.18955800 | C     | -5.17899100 | 3.57577100  | 1.50486900  |
| F | 0.95957100  | -1.86990500 | -2.03633900 | C     | -4.39246200 | 2.94206700  | 2.46387400  |
| C | -0.67295800 | -3.46623800 | -1.72460200 | H     | -4.50921900 | 3.21477500  | 3.50971600  |
| F | -0.58523800 | -3.77662800 | -3.01956400 | C     | -3.45310200 | 1.96593500  | 2.13436600  |
| C | -1.60585900 | -4.10860900 | -0.92427300 | C     | -4.02799800 | 1.88813600  | -1.68312400 |
| F | -2.40898100 | -5.03968900 | -1.43456100 | H     | -4.50871700 | 2.67451400  | -2.26806800 |
| C | -1.72252400 | -3.71711300 | 0.39485700  | H     | -4.53573600 | 0.94183800  | -1.89492800 |
| F | -2.65250700 | -4.26321200 | 1.18077300  | H     | -2.99772000 | 1.81053800  | -2.03707300 |
| C | -0.91731000 | -2.69051800 | 0.87813300  | C     | -6.19019800 | 4.61608100  | 1.90501800  |
| F | -1.20142800 | -2.33918600 | 2.15196800  | H     | -7.08400100 | 4.14206300  | 2.32302500  |
| C | 2.60184200  | -1.14955000 | 0.67601900  | H     | -6.50038800 | 5.21768800  | 1.04827200  |
| C | 3.14290000  | -2.38173500 | 0.30480900  | H     | -5.78573500 | 5.28462800  | 2.66892900  |
| F | 2.36461200  | -3.38920200 | -0.12306200 | C     | -2.68023100 | 1.32763200  | 3.26048600  |
| C | 4.49470300  | -2.69960800 | 0.38624300  | H     | -1.59895400 | 1.40041300  | 3.13490500  |
| F | 4.92514100  | -3.90667000 | 0.01938300  | H     | -2.91304000 | 0.26178300  | 3.36094300  |
| C | 5.39494400  | -1.76226300 | 0.86392800  | H     | -2.93810300 | 1.80682400  | 4.20617800  |
| F | 6.69040400  | -2.04916000 | 0.95360700  | C     | -2.94870900 | -0.91393100 | -0.65787700 |
| C | 4.91580800  | -0.52558200 | 1.26492300  | C     | -2.74052300 | -1.19414000 | -2.02207800 |
| F | 5.75528900  | 0.39364700  | 1.74218200  | C     | -3.52036700 | -2.18119400 | -2.62967100 |
| C | 3.55608100  | -0.25674600 | 1.17499800  | H     | -3.34108300 | -2.40213400 | -3.67875300 |
| F | 3.19502300  | 0.96006600  | 1.61397600  | C     | -4.47418000 | -2.91275100 | -1.93352100 |
| H | -0.77082800 | -0.10753500 | 1.67448200  | C     | -4.65004300 | -2.63240600 | -0.57973100 |
| C | 0.59319000  | -0.23172000 | 2.16717200  | H     | -5.37018700 | -3.21022100 | -0.00620500 |
| C | 0.65688700  | 1.08573100  | 2.68017100  | C     | -3.91016500 | -1.65375400 | 0.07737300  |
| C | 0.92999900  | 1.05490900  | 4.04762900  | C     | -1.70863300 | -0.52278600 | -2.88914600 |
| C | 1.08576200  | -0.28350300 | 4.37483200  | H     | -1.42867400 | -1.19345400 | -3.70458700 |
| N | 0.88884600  | -1.04407800 | 3.28116400  | H     | -0.79952400 | -0.28449500 | -2.34196200 |
| H | 0.48626600  | 1.96951700  | 2.08154200  | H     | -2.09806100 | 0.40028700  | -3.33192500 |
| H | 1.01062400  | 1.89087400  | 4.72618600  | C     | -5.23756100 | -4.02559600 | -2.59604200 |
| H | 1.33693900  | -0.74356000 | 5.32205000  | H     | -6.24060700 | -4.12569000 | -2.17517600 |
| C | 1.19881000  | -2.46917800 | 3.27766200  | H     | -4.71166000 | -4.97232200 | -2.43812300 |

|   |             |             |             |        |             |             |             |
|---|-------------|-------------|-------------|--------|-------------|-------------|-------------|
| H | -5.32416600 | -3.86414000 | -3.67250100 | F      | 6.79741700  | -2.02061500 | 0.21073000  |
| C | -4.13808900 | -1.48422100 | 1.55947500  | C      | 5.07923200  | -0.54290100 | 0.87284500  |
| H | -4.48633400 | -0.47761900 | 1.80744000  | F      | 5.97716300  | 0.35209100  | 1.28711400  |
| H | -3.22601800 | -1.68764500 | 2.13097600  | C      | 3.71956100  | -0.28130700 | 0.98973100  |
| H | -4.89170200 | -2.19461700 | 1.90117000  | F      | 3.42703200  | 0.89452900  | 1.56423100  |
| C | -0.74801600 | 2.41845200  | -1.15794900 | H      | -1.65338700 | -0.21806100 | 1.49585400  |
| C | -1.27974900 | 3.56578000  | -0.55911000 | C      | 0.97849300  | -0.29814200 | 2.33881200  |
| H | -1.52238300 | 3.55789200  | 0.49840300  | C      | 0.66378700  | 0.91754900  | 2.92361400  |
| C | -1.47918900 | 4.72504800  | -1.30274900 | C      | 0.83226500  | 0.80954700  | 4.33086900  |
| H | -1.89562100 | 5.60381900  | -0.82126000 | C      | 1.25772200  | -0.47219600 | 4.57293900  |
| C | -1.13400700 | 4.76258700  | -2.65018100 | N      | 1.35515800  | -1.12887700 | 3.37495100  |
| H | -1.29095200 | 5.66764600  | -3.22807700 | H      | 0.40179600  | 1.81336100  | 2.37915800  |
| C | -0.56284600 | 3.64090000  | -3.24704000 | H      | 0.67006300  | 1.57763500  | 5.07350600  |
| H | -0.26286800 | 3.66905300  | -4.28955900 | H      | 1.50063500  | -0.97859000 | 5.49652200  |
| C | -0.36889800 | 2.48067400  | -2.50653400 | C      | 1.82656800  | -2.49483000 | 3.26246200  |
| H | 0.09652200  | 1.61503900  | -2.96859700 | H      | 2.91773900  | -2.54248400 | 3.34417800  |
| C | 1.82030100  | 1.53203400  | -0.57433100 | H      | 1.38047900  | -3.10271000 | 4.05346400  |
| C | 2.03503300  | 2.79405800  | -0.01817500 | H      | 1.53992100  | -2.91547500 | 2.29878000  |
| F | 1.20644200  | 3.28177800  | 0.90832100  |        |             |             |             |
| C | 3.10572300  | 3.59596300  | -0.38081000 | P25_TS |             |             |             |
| F | 3.27581100  | 4.78680400  | 0.18817100  | B      | -1.56465600 | -0.26161200 | 0.05672800  |
| C | 4.00098800  | 3.15401200  | -1.34433300 | C      | -0.13356800 | -1.48702400 | 2.17548200  |
| F | 5.02429300  | 3.91872500  | -1.70843300 | C      | -1.26538400 | -0.76461900 | 1.62560900  |
| C | 3.80542300  | 1.91658400  | -1.93764000 | C      | 1.17525100  | -1.66235600 | 1.56876800  |
| F | 4.63807700  | 1.49181600  | -2.88515200 | C      | -0.27359200 | -2.09352800 | 3.47388900  |
| C | 2.72824800  | 1.13028700  | -1.55009200 | C      | 2.08978600  | -2.55145700 | 2.10084900  |
| F | 2.56406800  | -0.03033000 | -2.18388200 | H      | 3.03514500  | -2.71502200 | 1.59911500  |
| C | 0.08588800  | -1.96114600 | 0.34514400  | C      | -2.31662800 | -0.53843000 | 2.50258500  |
| C | 0.06292100  | -2.41620900 | -0.97301800 | H      | -3.16318300 | 0.03840700  | 2.15019900  |
| F | 0.87229400  | -1.84657100 | -1.87454300 | C      | -1.40794500 | -1.84296900 | 4.28146900  |
| C | -0.75505300 | -3.42936700 | -1.44468300 | H      | -1.46144500 | -2.30525700 | 5.26301500  |
| F | -0.76884000 | -3.75104100 | -2.74000400 | C      | 0.71544900  | -2.96665300 | 3.99844500  |
| C | -1.62667500 | -4.05847300 | -0.56891400 | H      | 0.52942500  | -3.42107700 | 4.96796000  |
| F | -2.46638100 | -4.99632600 | -1.00560000 | C      | 1.85669400  | -3.24264100 | 3.30521700  |
| C | -1.65406200 | -3.65227800 | 0.75292500  | H      | 2.59797100  | -3.93666400 | 3.68567600  |
| F | -2.55029100 | -4.18155700 | 1.59072400  | C      | -2.39702800 | -1.02693100 | 3.81882500  |
| C | -0.81376700 | -2.62664800 | 1.17607800  | H      | -3.26384000 | -0.79209800 | 4.42811000  |
| F | -0.98751800 | -2.25673400 | 2.46208300  | C      | -3.20753600 | -0.23203300 | -0.21381900 |
| C | 2.70382300  | -1.14302400 | 0.55673300  | C      | -3.98446600 | -1.36527800 | 0.05681100  |
| C | 3.19353900  | -2.35051900 | 0.05531100  | C      | -3.92957800 | 0.81267300  | -0.78733600 |
| F | 2.37213300  | -3.35375600 | -0.30169900 | C      | -5.34307000 | -1.46197400 | -0.20921100 |
| C | 4.54366000  | -2.66063900 | -0.07095100 | C      | -5.29150900 | 0.75960000  | -1.07435400 |
| F | 4.91798500  | -3.84184900 | -0.56526900 | C      | -6.00812600 | -0.38653700 | -0.78014500 |
| C | 5.50092000  | -1.74520300 | 0.32910600  | C      | -0.91316800 | 1.24523800  | -0.20379000 |

|   |             |             |             |       |             |             |             |
|---|-------------|-------------|-------------|-------|-------------|-------------|-------------|
| C | -0.10361200 | 1.64896300  | -1.25859200 | H     | 1.41147900  | -1.56151200 | -2.71867700 |
| C | -1.18146800 | 2.27989500  | 0.69794000  | H     | 2.09519500  | -3.04347300 | -3.40186600 |
| C | -0.64718200 | 3.55628000  | 0.61483200  | F     | -3.32914900 | 1.96102400  | -1.15554500 |
| C | 0.42850300  | 2.92409400  | -1.41124500 | F     | -5.90438700 | 1.80503800  | -1.63263500 |
| C | 0.17857500  | 3.88357100  | -0.45077100 | F     | -7.31080300 | -0.46135100 | -1.04478700 |
| P | 1.73185400  | -0.72701300 | 0.08958300  | F     | -6.01519600 | -2.57689100 | 0.08192300  |
| C | 2.33786900  | 0.99176900  | 0.43335800  | F     | -3.43647200 | -2.44638100 | 0.62736000  |
| C | 2.12792600  | 1.69751400  | 1.64061700  | F     | -2.01762300 | 2.07860900  | 1.72656400  |
| C | 3.04472600  | 1.61928900  | -0.62348600 | F     | -0.91641400 | 4.46965500  | 1.54747800  |
| C | 2.62861500  | 2.99631300  | 1.75546400  | F     | 0.73467100  | 5.09165800  | -0.53422300 |
| C | 3.52948400  | 2.91554900  | -0.44117800 | F     | 1.24240700  | 3.19617000  | -2.43521600 |
| C | 3.32737100  | 3.62959800  | 0.73325400  | F     | 0.30110100  | 0.77076800  | -2.20765500 |
| H | 2.45414800  | 3.53290700  | 2.68508600  | C     | -1.60790100 | -2.73634000 | -2.78376900 |
| H | 4.05666100  | 3.38868000  | -1.26633700 | C     | -1.32069600 | -3.61559200 | -1.74961900 |
| C | 3.25543900  | -1.56703200 | -0.50958100 | C     | -0.99854100 | -2.82104500 | -0.64926000 |
| C | 4.49818600  | -1.38832400 | 0.13729800  | C     | -1.05364100 | -1.44853800 | -1.00307300 |
| C | 3.19054200  | -2.30461400 | -1.71112500 | N     | -1.45987600 | -1.46764600 | -2.35663200 |
| C | 5.63748300  | -1.96686100 | -0.42835200 | H     | -1.91634800 | -2.93782900 | -3.80164800 |
| C | 4.35814500  | -2.85378000 | -2.23558100 | H     | -1.34873300 | -4.69354700 | -1.80346500 |
| C | 5.59335600  | -2.69842300 | -1.60996000 | H     | -0.74745200 | -3.17752900 | 0.33947900  |
| H | 6.59206000  | -1.83068000 | 0.07509000  | C     | -1.88851200 | -0.34192600 | -3.17921200 |
| H | 4.30006400  | -3.41508100 | -3.16526800 | H     | -2.06890600 | 0.53174000  | -2.55765800 |
| C | 1.40815300  | 1.15224700  | 2.84955900  | H     | -1.13364700 | -0.09375800 | -3.92767800 |
| H | 0.34711400  | 0.97820300  | 2.65140900  | H     | -2.82417700 | -0.60931300 | -3.67503300 |
| H | 1.83404600  | 0.20757300  | 3.19934100  | H     | 0.33282300  | -1.04086200 | -0.78657500 |
| H | 1.47719900  | 1.87243200  | 3.66670200  |       |             |             |             |
| C | 3.78758100  | 5.05540800  | 0.87093000  | P25-P |             |             |             |
| H | 2.99953200  | 5.73154100  | 0.52482300  | C     | -2.94375200 | -2.03755900 | 3.53202000  |
| H | 4.00950100  | 5.30302100  | 1.91154700  | C     | -1.75285000 | -2.32906000 | 4.12863600  |
| H | 4.68010100  | 5.24601500  | 0.27030900  | C     | -0.51372600 | -2.07130600 | 3.48814900  |
| C | 3.31876600  | 1.00673100  | -1.98143400 | C     | -0.41828100 | -1.47285200 | 2.17284200  |
| H | 2.51655100  | 0.35346200  | -2.32315300 | C     | -1.71914100 | -1.12113800 | 1.61876900  |
| H | 3.41665600  | 1.80776200  | -2.71611600 | C     | -2.90447900 | -1.42649800 | 2.27227800  |
| H | 4.24643700  | 0.42559100  | -1.97641100 | H     | 0.50304100  | -2.89187500 | 5.20682400  |
| C | 4.70605300  | -0.58537000 | 1.40201800  | H     | -3.89311800 | -2.25125100 | 4.01001400  |
| H | 4.92212100  | 0.46162100  | 1.16401100  | H     | -1.72398600 | -2.78384400 | 5.11508200  |
| H | 3.84019100  | -0.59419100 | 2.06539600  | C     | 0.63677300  | -2.45230700 | 4.22277300  |
| H | 5.55827700  | -0.98924900 | 1.95406500  | C     | 0.90974900  | -1.31360600 | 1.58186800  |
| C | 6.83398500  | -3.32461300 | -2.18937300 | H     | -3.85354800 | -1.16921100 | 1.81222200  |
| H | 6.86271700  | -4.39697400 | -1.97084000 | C     | 1.96470400  | -1.72157600 | 2.38579000  |
| H | 6.86101700  | -3.21106000 | -3.27613500 | C     | 1.86860200  | -2.26704700 | 3.67920500  |
| H | 7.73783900  | -2.87459200 | -1.77345700 | H     | 2.96814200  | -1.66426400 | 1.98778000  |
| C | 1.90450700  | -2.50856300 | -2.46953800 | H     | 2.77064400  | -2.54684100 | 4.21445400  |
| H | 1.18907900  | -3.09478100 | -1.88783000 | P     | -2.11005000 | -0.20701900 | 0.09885800  |

|   |             |             |             |   |             |             |             |
|---|-------------|-------------|-------------|---|-------------|-------------|-------------|
| B | 1.37548100  | -0.83998000 | 0.03503100  | C | -2.00958700 | 2.27464800  | -1.03618700 |
| C | 3.05845400  | -0.84917300 | -0.12106100 | C | -1.95249800 | 1.55585400  | -2.36089600 |
| C | 3.83392800  | 0.04395600  | 0.62806300  | H | -6.14118500 | 1.54345900  | -0.09851100 |
| F | 3.25920800  | 0.77978100  | 1.59730200  | H | -4.68710100 | 1.42356200  | 0.89121000  |
| C | 5.19900400  | 0.22819500  | 0.47929000  | H | -4.58805500 | 2.07937400  | -0.74030800 |
| F | 5.86087800  | 1.10049700  | 1.24531100  | H | -6.89620300 | -0.07459500 | -1.37716200 |
| C | 5.88121700  | -0.50969400 | -0.47611500 | H | -6.93954500 | -3.38933500 | -3.07754600 |
| F | 7.19556300  | -0.35658800 | -0.63982900 | H | -7.88910200 | -2.94635900 | -1.65577100 |
| C | 5.17376500  | -1.41504500 | -1.24333900 | H | -7.74381900 | -1.81043400 | -2.99782800 |
| C | 3.80015200  | -1.56682400 | -1.05847600 | H | -4.79864200 | -3.75472400 | -1.93373700 |
| F | 3.24264000  | -2.48757300 | -1.85828400 | H | -2.54692300 | -3.94647900 | -1.46762100 |
| F | 5.81324700  | -2.14699500 | -2.16046100 | H | -2.62627100 | -3.57955200 | 0.26299100  |
| C | 1.12283500  | 0.78591000  | -0.26603400 | H | -1.55455700 | -2.66300200 | -0.79656100 |
| C | 1.49000300  | 1.37076500  | -1.48037700 | H | -2.46132600 | 2.49636500  | 3.52474100  |
| F | 1.93158700  | 0.61410400  | -2.49798600 | H | -1.57000900 | 1.05347500  | 3.03177500  |
| C | 1.48730300  | 2.73868300  | -1.72768300 | H | -3.32443700 | 1.11880100  | 2.83563600  |
| F | 1.79530700  | 3.21324400  | -2.93894300 | H | -2.26137100 | 4.28754000  | 2.26259600  |
| C | 1.19701500  | 3.61367200  | -0.69532200 | H | -1.95390600 | 6.31335400  | -0.88010700 |
| F | 1.15508100  | 4.93051800  | -0.90718300 | H | -0.91473500 | 6.16948500  | 0.54537100  |
| C | 0.91935300  | 3.09874400  | 0.55791800  | H | -2.65556800 | 6.38509900  | 0.74921500  |
| C | 0.86687800  | 1.72319500  | 0.73624300  | H | -1.87088800 | 4.18450500  | -1.99405300 |
| F | 0.55058300  | 1.33205300  | 1.98142500  | H | -1.93982400 | 2.27816000  | -3.17881000 |
| F | 0.67634500  | 3.93325200  | 1.57472300  | H | -1.04881600 | 0.94679700  | -2.44841200 |
| C | -3.69655800 | -0.84944800 | -0.55597800 | H | -2.81230300 | 0.89319600  | -2.51282100 |
| C | -4.88055300 | -0.08102000 | -0.66632000 | C | 0.36111800  | -3.82187900 | -2.12801900 |
| C | -5.07356200 | 1.31678800  | -0.12498300 | C | -0.01018000 | -2.84389200 | -3.01664400 |
| C | -5.98753100 | -0.66461900 | -1.28413900 | C | 0.23652800  | -1.60758600 | -2.37001300 |
| C | -5.97807100 | -1.96947100 | -1.77169400 | C | 0.74994800  | -1.84008300 | -1.09585500 |
| C | -7.20194300 | -2.56041400 | -2.41631800 | N | 0.79076900  | -3.22140800 | -0.97508300 |
| C | -4.82266200 | -2.72197500 | -1.59478100 | H | 0.34097600  | -4.89985800 | -2.20718600 |
| C | -3.68427900 | -2.19718400 | -0.98439000 | H | -0.40197400 | -2.99753900 | -4.01215900 |
| C | -2.53420600 | -3.13725100 | -0.73614700 | H | 0.12123300  | -0.63672600 | -2.82720700 |
| C | -2.11509600 | 1.60493900  | 0.20253700  | C | 1.35072200  | -3.98568000 | 0.12296800  |
| C | -2.22944400 | 2.33082100  | 1.40901900  | H | 2.34786600  | -3.61837500 | 0.37845900  |
| C | -2.40390900 | 1.70809100  | 2.77190000  | H | 0.72055800  | -3.93684500 | 1.01496200  |
| C | -2.19845100 | 3.72076700  | 1.33683900  | H | 1.43673000  | -5.02640300 | -0.19448500 |
| C | -2.04684000 | 4.40975500  | 0.13357900  | H | -1.15404100 | -0.52927100 | -0.86866200 |
| C | -1.89278000 | 5.90434400  | 0.13043100  |   |             |             |             |
| C | -1.97832300 | 3.66973000  | -1.04226500 |   |             |             |             |

## 6. Coordinates of intermediates and transition states involved in Figure 4.

IM1

|   |            |             |             |
|---|------------|-------------|-------------|
| P | 3.12339900 | -0.42689600 | 0.43326100  |
| C | 2.91340400 | -1.49395400 | -1.04527900 |

|   |             |             |             |   |             |             |             |
|---|-------------|-------------|-------------|---|-------------|-------------|-------------|
| C | 3.93586700  | -2.15676000 | -1.73117300 | C | 4.95834300  | -0.46649500 | 0.67959700  |
| C | 3.66127300  | -3.17928800 | -2.65221000 | C | 5.41724600  | -1.33528300 | 1.69665800  |
| C | 2.36224700  | -3.60741400 | -2.90115900 | C | 4.47931600  | -2.21951300 | 2.48446500  |
| C | 1.31622100  | -2.97198500 | -2.22575000 | C | 6.77949400  | -1.39815400 | 1.98713000  |
| C | 1.62571400  | -1.92639900 | -1.35151200 | C | 7.71360900  | -0.62373600 | 1.30195800  |
| O | 0.50218600  | -1.39847400 | -0.78194900 | C | 9.17591100  | -0.68153900 | 1.65597200  |
| C | -0.56545100 | -2.14554100 | -1.24026000 | C | 7.25132600  | 0.20888100  | 0.28705400  |
| C | -0.12876200 | -3.13021300 | -2.13443000 | C | 5.89608100  | 0.30055300  | -0.04239700 |
| C | -1.07517100 | -3.99257300 | -2.69336500 | C | 5.50992000  | 1.20348200  | -1.18493600 |
| C | -2.40138700 | -3.81895000 | -2.32227700 | H | 4.96851900  | -1.88617900 | -1.52921000 |
| C | -2.78493000 | -2.80311300 | -1.43191800 | H | 4.48912700  | -3.65991100 | -3.16332200 |
| C | -1.88321300 | -1.90377300 | -0.85146000 | H | 2.16785400  | -4.42048900 | -3.59331600 |
| B | -2.26038800 | -0.69341400 | 0.18301800  | H | -0.78228000 | -4.77222500 | -3.38941600 |
| C | -3.88305900 | -0.61237800 | 0.43871700  | H | -3.16208800 | -4.47506000 | -2.73346200 |
| C | -4.69383800 | -0.35083000 | -0.66937800 | H | -3.84027300 | -2.72112600 | -1.18396500 |
| F | -4.14445600 | -0.23903700 | -1.88882900 | H | 3.15481200  | 2.43468700  | 3.32237800  |
| C | -6.06964400 | -0.18559300 | -0.60660800 | H | 2.71083600  | 0.77406400  | 2.89225000  |
| F | -6.78055800 | 0.05080500  | -1.71033400 | H | 4.32191500  | 1.38150100  | 2.51497500  |
| C | -6.70737000 | -0.25898800 | 0.62286700  | H | 2.41816100  | 4.11280100  | 2.04283400  |
| F | -8.02655000 | -0.09938900 | 0.70947100  | H | 1.34571800  | 5.85788300  | -1.08610600 |
| C | -5.95101200 | -0.49884400 | 1.75625800  | H | 0.34840000  | 5.53796100  | 0.33412900  |
| C | -4.57487800 | -0.66300900 | 1.64135600  | H | 2.00166200  | 6.12007600  | 0.54083000  |
| F | -3.92740200 | -0.86783200 | 2.80253300  | H | 1.41732800  | 3.63301800  | -2.08300600 |
| F | -6.54185500 | -0.56092800 | 2.95220200  | H | 1.88431600  | 1.81329300  | -3.24337000 |
| C | -1.85700100 | 0.80139600  | -0.38813100 | H | 1.19256000  | 0.43434600  | -2.39733500 |
| C | -2.14427000 | 1.93267000  | 0.37765200  | H | 2.92725000  | 0.51396700  | -2.65783900 |
| F | -2.71412200 | 1.79564900  | 1.59113600  | H | 5.04710600  | -2.85946800 | 3.16416600  |
| C | -1.89562800 | 3.23882300  | -0.02146900 | H | 3.88452400  | -2.86481300 | 1.83099000  |
| F | -2.15695400 | 4.26731000  | 0.79059000  | H | 3.77410000  | -1.62944400 | 3.07850400  |
| C | -1.37302500 | 3.46711400  | -1.28232500 | H | 7.12046900  | -2.07384200 | 2.76864500  |
| F | -1.09757000 | 4.70418600  | -1.69435800 | H | 9.40531400  | 0.00747100  | 2.47617200  |
| C | -1.11392500 | 2.38676700  | -2.10548800 | H | 9.80190900  | -0.40121200 | 0.80515900  |
| C | -1.36448200 | 1.09578900  | -1.65942900 | H | 9.46663800  | -1.68426700 | 1.98034500  |
| F | -1.10476400 | 0.13648600  | -2.55818800 | H | 7.96626000  | 0.80204300  | -0.27928800 |
| F | -0.59159500 | 2.59794600  | -3.31714800 | H | 6.39085100  | 1.45638200  | -1.77982900 |
| C | 2.68312600  | 1.33340400  | 0.07935300  | H | 4.78394900  | 0.72127800  | -1.84402000 |
| C | 2.75402100  | 2.16175300  | 1.22912600  | H | 5.06011200  | 2.13712300  | -0.83361800 |
| C | 3.26375300  | 1.66007000  | 2.55986900  | H | -0.31947200 | -1.18093700 | 1.07707500  |
| C | 2.35151800  | 3.49316700  | 1.15089900  | C | -1.53253200 | -1.83244300 | 3.66806400  |
| C | 1.85650600  | 4.04544000  | -0.02802400 | C | -1.12855500 | -0.48054900 | 3.84601900  |
| C | 1.36621300  | 5.46867900  | -0.06575500 | C | -0.97277100 | 0.03648000  | 2.59721100  |
| C | 1.79686700  | 3.22323600  | -1.14854800 | C | -1.27596500 | -0.97549600 | 1.58276200  |
| C | 2.19135600  | 1.87985100  | -1.12583300 | N | -1.59838900 | -2.13429000 | 2.39730100  |
| C | 2.04867100  | 1.11544200  | -2.41981200 | H | -1.77605400 | -2.56902500 | 4.42560300  |

|            |             |             |             |   |             |             |             |
|------------|-------------|-------------|-------------|---|-------------|-------------|-------------|
| H          | -0.96937000 | 0.00182100  | 4.79887200  | F | -1.08541500 | 2.53671300  | -3.71542200 |
| H          | -0.59828500 | 1.02066300  | 2.34878500  | C | 2.50497800  | 1.22422200  | 0.18993500  |
| C          | -2.04988300 | -3.41336300 | 1.87402700  | C | 2.52930400  | 2.02333300  | 1.36597300  |
| H          | -3.01885400 | -3.28501800 | 1.38552800  | C | 3.26554300  | 1.59444300  | 2.61212400  |
| H          | -1.33328200 | -3.79216300 | 1.14428600  | C | 1.88534600  | 3.25766400  | 1.38461500  |
| H          | -2.14261500 | -4.11458600 | 2.70385900  | C | 1.22422400  | 3.76008300  | 0.26355900  |
| <b>TS1</b> |             |             |             | C | 0.51725700  | 5.08890400  | 0.30985300  |
| P          | 3.16517300  | -0.48314200 | 0.46638100  | C | 1.25707700  | 2.99353100  | -0.89501500 |
| C          | 2.96358300  | -1.52138800 | -1.02681800 | C | 1.87088200  | 1.73558400  | -0.96395600 |
| C          | 3.98888100  | -2.15633800 | -1.73332100 | C | 1.80164900  | 1.04602300  | -2.30598000 |
| C          | 3.71594000  | -3.15761800 | -2.67851200 | C | 5.00006200  | -0.32814200 | 0.63091600  |
| C          | 2.41815800  | -3.58297600 | -2.93904200 | C | 5.59373900  | -1.10461200 | 1.65430400  |
| C          | 1.36923600  | -2.96964300 | -2.24672100 | C | 4.79905600  | -2.08152400 | 2.48915800  |
| C          | 1.67907000  | -1.95706000 | -1.33673700 | C | 6.96026200  | -0.98784400 | 1.89901600  |
| O          | 0.55607900  | -1.44262500 | -0.75362400 | C | 7.76946300  | -0.12466300 | 1.15982900  |
| C          | -0.51809600 | -2.14640000 | -1.26579400 | C | 9.24106300  | -0.01251500 | 1.45806300  |
| C          | -0.07908500 | -3.11001200 | -2.18151700 | C | 7.17810700  | 0.60998900  | 0.13784800  |
| C          | -1.02867700 | -3.93694700 | -2.78655900 | C | 5.81182300  | 0.52128400  | -0.14725500 |
| C          | -2.35776100 | -3.75351800 | -2.43297600 | C | 5.27743900  | 1.32720800  | -1.30175100 |
| C          | -2.74403600 | -2.75389000 | -1.52484800 | H | 5.01946900  | -1.87637200 | -1.53294800 |
| C          | -1.83973500 | -1.88106300 | -0.91094400 | H | 4.54446300  | -3.61951400 | -3.20558000 |
| B          | -2.21670000 | -0.64271600 | 0.08930500  | H | 2.22676800  | -4.37215800 | -3.65898900 |
| C          | -3.77494900 | -0.73125700 | 0.61052200  | H | -0.73519600 | -4.69812900 | -3.50251800 |
| C          | -4.80082100 | -0.55429200 | -0.31764500 | H | -3.12104300 | -4.38634600 | -2.87476500 |
| F          | -4.50226700 | -0.37480400 | -1.61482700 | H | -3.80206400 | -2.65968900 | -1.30104500 |
| C          | -6.14996900 | -0.54923600 | 0.00675900  | H | 3.01356200  | 2.24884400  | 3.45038500  |
| F          | -7.07985200 | -0.38264900 | -0.93544500 | H | 3.02488800  | 0.56349000  | 2.89366200  |
| C          | -6.52862200 | -0.71214800 | 1.33068400  | H | 4.35019700  | 1.64030300  | 2.46592100  |
| F          | -7.81646800 | -0.71157500 | 1.66921800  | H | 1.90751000  | 3.84785900  | 2.29882200  |
| C          | -5.54973600 | -0.87660600 | 2.29619700  | H | 0.01692800  | 5.30770600  | -0.63644800 |
| C          | -4.21076500 | -0.87497300 | 1.92305900  | H | -0.23920200 | 5.10445400  | 1.10059500  |
| F          | -3.33141700 | -1.01840400 | 2.93292800  | H | 1.22014400  | 5.90233700  | 0.51718200  |
| F          | -5.89761500 | -1.02849200 | 3.57598000  | H | 0.80092000  | 3.38983600  | -1.79959700 |
| C          | -2.06298700 | 0.83836200  | -0.62691500 | H | 1.60381100  | 1.78638900  | -3.08542100 |
| C          | -2.41428400 | 1.98519300  | 0.08665400  | H | 0.98889700  | 0.31601000  | -2.34520600 |
| F          | -2.84036600 | 1.87883200  | 1.35969000  | H | 2.72102000  | 0.52113900  | -2.56466800 |
| C          | -2.34158100 | 3.27579600  | -0.41864700 | H | 5.45467600  | -2.59415200 | 3.19685200  |
| F          | -2.66017500 | 4.32842800  | 0.33863400  | H | 4.31483500  | -2.84068000 | 1.86650800  |
| C          | -1.91148000 | 3.46243900  | -1.72163800 | H | 4.00618400  | -1.58261400 | 3.05509000  |
| F          | -1.76920600 | 4.69166700  | -2.21985700 | H | 7.40788700  | -1.58920800 | 2.68779200  |
| C          | -1.56348000 | 2.35955200  | -2.48115300 | H | 9.72969200  | 0.69806300  | 0.78770300  |
| C          | -1.65459000 | 1.08463400  | -1.93556100 | H | 9.73934400  | -0.98087900 | 1.34782400  |
| F          | -1.30152800 | 0.08997100  | -2.76151900 | H | 9.40814900  | 0.32220200  | 2.48671000  |
|            |             |             |             | H | 7.79517700  | 1.26951600  | -0.46821100 |

|     |             |             |             |   |             |             |             |
|-----|-------------|-------------|-------------|---|-------------|-------------|-------------|
| H   | 6.10052800  | 1.69996900  | -1.91581600 | C | -1.96641100 | 0.85101400  | -0.41290700 |
| H   | 4.63229000  | 0.71652300  | -1.93823900 | C | -2.15058300 | 1.94647400  | 0.42737200  |
| H   | 4.68894500  | 2.18591000  | -0.96563800 | F | -2.60656500 | 1.75186500  | 1.68311400  |
| H   | -0.04101100 | -0.29700000 | 0.90485100  | C | -1.89761600 | 3.26278900  | 0.06914900  |
| C   | -0.10583200 | -1.42321800 | 3.20342300  | F | -2.06373000 | 4.26098400  | 0.94145900  |
| C   | 0.19883500  | -0.08309000 | 3.15525600  | C | -1.46020900 | 3.53181800  | -1.21655400 |
| C   | -0.45362700 | 0.42160800  | 2.00947800  | F | -1.17509400 | 4.77839500  | -1.59226900 |
| C   | -1.16091600 | -0.65644100 | 1.36179500  | C | -1.28072600 | 2.48395000  | -2.10186600 |
| N   | -0.87826800 | -1.76462000 | 2.14759600  | C | -1.54131200 | 1.18097200  | -1.69753400 |
| H   | 0.21488000  | -2.17810100 | 3.90954600  | F | -1.34494200 | 0.24421400  | -2.63518900 |
| H   | 0.82321500  | 0.46870000  | 3.84011600  | F | -0.81291500 | 2.73650100  | -3.32784100 |
| H   | -0.44698200 | 1.44063300  | 1.64352400  | C | 2.60679300  | 1.28365200  | 0.11487400  |
| C   | -1.39177400 | -3.10825800 | 1.91409700  | C | 2.74656500  | 2.12853900  | 1.24669300  |
| H   | -1.36486300 | -3.65333800 | 2.85796700  | C | 3.32668700  | 1.64649700  | 2.55549000  |
| H   | -2.42187200 | -3.05137500 | 1.56223500  | C | 2.35492300  | 3.46356800  | 1.17170300  |
| H   | -0.78726600 | -3.62856900 | 1.16810000  | C | 1.81362100  | 4.00870700  | 0.01094100  |
|     |             |             |             | C | 1.34553500  | 5.43913400  | -0.02542600 |
|     |             |             |             | C | 1.68352600  | 3.17090600  | -1.09218600 |
| IM2 |             |             |             | C | 2.05458500  | 1.82107900  | -1.07047300 |
| P   | 3.07649900  | -0.47212200 | 0.47088800  | C | 1.82969600  | 1.04525500  | -2.34587400 |
| C   | 2.82114900  | -1.54401200 | -0.99349900 | C | 4.91873300  | -0.46662700 | 0.64701100  |
| C   | 3.83604300  | -2.18765300 | -1.70885700 | C | 5.43451100  | -1.28057600 | 1.68030000  |
| C   | 3.55503700  | -3.17183600 | -2.66742300 | C | 4.54815800  | -2.15157300 | 2.53982000  |
| C   | 2.25114900  | -3.56555600 | -2.94148700 | C | 6.80796100  | -1.29507100 | 1.92650900  |
| C   | 1.21331600  | -2.94700000 | -2.23975000 | C | 7.69554600  | -0.52429600 | 1.18002900  |
| C   | 1.52685600  | -1.96271300 | -1.29635600 | C | 9.17003900  | -0.51772000 | 1.48271900  |
| O   | 0.40094200  | -1.44984600 | -0.71025000 | C | 7.17667700  | 0.25363700  | 0.14773800  |
| C   | -0.67075800 | -2.11493700 | -1.27540400 | C | 5.81033000  | 0.29564100  | -0.13820900 |
| C   | -0.23638700 | -3.05761200 | -2.21259600 | C | 5.35936900  | 1.14637000  | -1.29733500 |
| C   | -1.19026300 | -3.83395900 | -2.87604200 | H | 4.87018800  | -1.92313300 | -1.50790500 |
| C   | -2.52518000 | -3.62026600 | -2.56376600 | H | 4.37887500  | -3.63850900 | -3.19754900 |
| C   | -2.91058100 | -2.64291900 | -1.63103900 | H | 2.04490600  | -4.33382600 | -3.67986800 |
| C   | -1.99614500 | -1.83225000 | -0.95336800 | H | -0.89537700 | -4.57810800 | -3.60925500 |
| B   | -2.34274500 | -0.65833900 | 0.12968700  | H | -3.29202600 | -4.20925300 | -3.05706000 |
| C   | -3.93741400 | -0.60904800 | 0.51095700  | H | -3.97223900 | -2.51817200 | -1.43494100 |
| C   | -4.85548900 | -0.27678800 | -0.48431900 | H | 3.19440400  | 2.40542400  | 3.32982900  |
| F   | -4.42942800 | -0.06766600 | -1.73941000 | H | 2.84314000  | 0.72332100  | 2.89451900  |
| C   | -6.21816300 | -0.13925800 | -0.26158200 | H | 4.39795900  | 1.43329300  | 2.47342800  |
| F   | -7.04689100 | 0.17549200  | -1.25799100 | H | 2.47444400  | 4.09312300  | 2.05107300  |
| C   | -6.71839100 | -0.32161300 | 1.01980700  | H | 1.30134400  | 5.81980400  | -1.04823100 |
| F   | -8.02219000 | -0.19323500 | 1.25810900  | H | 0.34062400  | 5.52665600  | 0.40205000  |
| C   | -5.84594100 | -0.63729600 | 2.04785800  | H | 2.00771600  | 6.08538100  | 0.55745900  |
| C   | -4.48872400 | -0.76349100 | 1.77685000  | H | 1.27159400  | 3.57606400  | -2.01494900 |
| F   | -3.70690800 | -1.04830300 | 2.83609500  | H | 1.58996700  | 1.73411900  | -3.15893800 |
| F   | -6.30913000 | -0.80697000 | 3.28793800  |   |             |             |             |



|            |             |             |             |   |             |             |             |
|------------|-------------|-------------|-------------|---|-------------|-------------|-------------|
| H          | 0.98955900  | 0.35150100  | -2.25529700 | C | 4.67274500  | -0.24360800 | 0.35455400  |
| H          | 2.69968000  | 0.45737000  | -2.64487800 | F | 4.33004500  | 0.00532800  | 1.62943500  |
| H          | 5.15644000  | -2.76763600 | 3.20628700  | C | 6.01356800  | -0.07754200 | 0.03771700  |
| H          | 3.92333700  | -2.81803000 | 1.93811300  | F | 6.89867600  | 0.28930400  | 0.96785400  |
| H          | 3.87204000  | -1.54864200 | 3.15545300  | C | 6.43056300  | -0.28757000 | -1.26776500 |
| H          | 7.19322000  | -1.92919900 | 2.72188000  | F | 7.71251600  | -0.13414100 | -1.60001000 |
| H          | 9.43462400  | 0.34751200  | 2.10024500  | C | 5.49865800  | -0.65962300 | -2.22143500 |
| H          | 9.76203300  | -0.45688200 | 0.56562400  | C | 4.16538100  | -0.81502600 | -1.85806500 |
| H          | 9.46945300  | -1.41671100 | 2.02682200  | F | 3.33537500  | -1.16425100 | -2.85514700 |
| H          | 7.85582100  | 0.84386000  | -0.46420100 | F | 5.88629800  | -0.85808100 | -3.48445600 |
| H          | 6.21031600  | 1.39255500  | -1.93706700 | C | 1.75621100  | 0.83217600  | 0.39820200  |
| H          | 4.61608700  | 0.62730400  | -1.90760200 | C | 1.82568800  | 1.84331700  | -0.56023300 |
| H          | 4.90661800  | 2.08452100  | -0.96150600 | F | 2.16966900  | 1.54359500  | -1.82617500 |
| H          | 0.33105500  | 0.27407000  | 1.27958100  | C | 1.54461500  | 3.18011700  | -0.31124000 |
| C          | -0.27410700 | -2.20423500 | 2.99619400  | F | 1.58133200  | 4.08873000  | -1.29117000 |
| C          | 0.33106500  | -1.01800600 | 3.04077600  | C | 1.21201200  | 3.56797300  | 0.97513100  |
| C          | -0.34162800 | -0.12884000 | 2.04863600  | F | 0.90341500  | 4.83859900  | 1.24382700  |
| C          | -1.38738400 | -0.99491800 | 1.42097800  | C | 1.14670100  | 2.61101500  | 1.97055700  |
| N          | -1.30736300 | -2.15955500 | 2.01355100  | C | 1.42410400  | 1.28239400  | 1.67331300  |
| H          | -0.11341100 | -3.12250000 | 3.54376200  | F | 1.32122500  | 0.44132200  | 2.71570800  |
| H          | 1.14830600  | -0.73591900 | 3.68851700  | F | 0.76331000  | 2.96832800  | 3.20185200  |
| H          | -0.82590900 | 0.73559000  | 2.52099100  | C | -2.41755500 | 1.47389400  | 0.02037000  |
| C          | -2.14942900 | -3.32639200 | 1.78006900  | C | -2.45512400 | 2.18632400  | -1.20232400 |
| H          | -2.49489900 | -3.69979800 | 2.74560300  | C | -2.82430800 | 1.55103900  | -2.52303600 |
| H          | -3.00274100 | -3.05142000 | 1.16575800  | C | -2.19240700 | 3.55429900  | -1.19626200 |
| H          | -1.56695600 | -4.09731700 | 1.26978500  | C | -1.89643000 | 4.24336000  | -0.02182300 |
| <b>TS2</b> |             |             |             | C | -1.59093700 | 5.71599200  | -0.06323800 |
|            |             |             |             | C | -1.85423700 | 3.51864000  | 1.16622700  |
| P          | -2.71478500 | -0.32202000 | -0.15948400 | C | -2.09594100 | 2.14307600  | 1.21796800  |
| C          | -2.70705600 | -1.30437400 | 1.36992500  | C | -1.97838300 | 1.46534900  | 2.56045200  |
| C          | -3.78718700 | -1.87787300 | 2.04639700  | C | -4.41887700 | -0.58306700 | -0.78150700 |
| C          | -3.55735800 | -2.80985300 | 3.06894000  | C | -4.63341700 | -1.67678500 | -1.64233900 |
| C          | -2.27296100 | -3.23506200 | 3.41775400  | C | -3.52533400 | -2.62989500 | -2.00645700 |
| C          | -1.17573900 | -2.69174800 | 2.74443500  | C | -5.91394600 | -1.90144200 | -2.14711400 |
| C          | -1.45344600 | -1.72375800 | 1.77261700  | C | -6.98946700 | -1.08586700 | -1.80659800 |
| O          | -0.34535200 | -1.26427200 | 1.16322000  | C | -8.36838700 | -1.34019400 | -2.35308200 |
| C          | 0.70444300  | -1.98338400 | 1.67802100  | C | -6.76519700 | -0.04219100 | -0.90955300 |
| C          | 0.27572500  | -2.86748400 | 2.67262300  | C | -5.50422200 | 0.22508700  | -0.37582100 |
| C          | 1.25525800  | -3.66212200 | 3.28010700  | C | -5.38913900 | 1.34098600  | 0.63458100  |
| C          | 2.56658800  | -3.51497100 | 2.84175300  | H | -4.80472700 | -1.62188800 | 1.76494900  |
| C          | 2.92136800  | -2.60586700 | 1.82546800  | H | -4.41103600 | -3.23811500 | 3.58348900  |
| C          | 1.98578900  | -1.78423000 | 1.19395800  | H | -2.14032800 | -3.99065100 | 4.18540300  |
| B          | 2.13242100  | -0.71608900 | -0.04119300 | H | 1.00433300  | -4.37175800 | 4.06196900  |
| C          | 3.69544500  | -0.63356400 | -0.56115100 | H | 3.34438700  | -4.12146400 | 3.29554800  |

|   |             |             |             |   |             |             |             |
|---|-------------|-------------|-------------|---|-------------|-------------|-------------|
| H | 3.96550700  | -2.55679200 | 1.52360200  | C | -1.50674000 | -1.76295600 | 1.66759400  |
| H | -2.45617100 | 2.16539000  | -3.34736500 | O | -0.42844800 | -1.30828300 | 1.00725300  |
| H | -2.40646200 | 0.54811700  | -2.65254300 | C | 0.65619400  | -2.01561200 | 1.50076300  |
| H | -3.91095200 | 1.46092100  | -2.62828800 | C | 0.25251100  | -2.90809900 | 2.50004500  |
| H | -2.21998700 | 4.09651800  | -2.13915900 | C | 1.22901000  | -3.70131600 | 3.11218000  |
| H | -1.50379000 | 6.13521900  | 0.94090700  | C | 2.53915300  | -3.53972000 | 2.68553800  |
| H | -0.64496600 | 5.89190000  | -0.58449500 | C | 2.88243800  | -2.60749900 | 1.68839600  |
| H | -2.37229900 | 6.26176400  | -0.60031200 | C | 1.94968800  | -1.78654500 | 1.04945600  |
| H | -1.59645100 | 4.03216700  | 2.08995800  | B | 2.19938600  | -0.68741000 | -0.14388200 |
| H | -1.85020900 | 2.21548200  | 3.34278800  | C | 3.79992800  | -0.66292400 | -0.55831300 |
| H | -1.10895300 | 0.80026500  | 2.60258700  | C | 4.73872700  | -0.25951500 | 0.39037200  |
| H | -2.86006600 | 0.86823900  | 2.80668000  | F | 4.33910600  | 0.04111700  | 1.63920500  |
| H | -3.90718600 | -3.44304100 | -2.62705300 | C | 6.09862600  | -0.13999400 | 0.14196700  |
| H | -3.07103200 | -3.07577300 | -1.11397000 | F | 6.94276400  | 0.24791200  | 1.10324400  |
| H | -2.72352200 | -2.13293800 | -2.55771800 | C | 6.58050400  | -0.42327200 | -1.12670000 |
| H | -6.07331000 | -2.74247600 | -2.81752600 | F | 7.88305300  | -0.31289900 | -1.39509200 |
| H | -9.04613100 | -1.67165600 | -1.55971400 | C | 5.69203200  | -0.82488200 | -2.10938100 |
| H | -8.35322300 | -2.11076300 | -3.12699900 | C | 4.33669600  | -0.93280500 | -1.81319900 |
| H | -8.79389900 | -0.42947700 | -2.78436300 | F | 3.55979200  | -1.33040200 | -2.83284700 |
| H | -7.60269600 | 0.58028100  | -0.60187100 | F | 6.14373000  | -1.10159000 | -3.33680200 |
| H | -6.38097200 | 1.59192500  | 1.01724700  | C | 1.86580500  | 0.85747300  | 0.35913800  |
| H | -4.76525700 | 1.05775400  | 1.48814400  | C | 2.06850000  | 1.91532500  | -0.52801800 |
| H | -4.95736800 | 2.24841400  | 0.20154200  | F | 2.52350500  | 1.67529500  | -1.76825400 |
| H | -1.29227500 | -0.67780700 | -1.06543800 | C | 1.83002200  | 3.24969600  | -0.22255400 |
| C | 0.26195100  | -2.48765600 | -2.88355300 | F | 2.00791700  | 4.21163300  | -1.13645100 |
| C | -0.40450600 | -1.30928300 | -2.98973000 | C | 1.39201700  | 3.58424900  | 1.04702900  |
| C | 0.01286100  | -0.48789500 | -1.87123600 | F | 1.12124700  | 4.85343600  | 1.36756200  |
| C | 1.08001200  | -1.18059700 | -1.22166800 | C | 1.19106200  | 2.57779800  | 1.97261400  |
| N | 1.14042900  | -2.39407200 | -1.81436500 | C | 1.43534300  | 1.25613600  | 1.62192200  |
| H | 0.20701800  | -3.39656500 | -3.46539900 | F | 1.20652800  | 0.37011700  | 2.60868700  |
| H | -1.14090500 | -1.05965600 | -3.74183300 | F | 0.71511100  | 2.88584100  | 3.18696600  |
| H | -0.06242700 | 0.59519300  | -1.85049800 | C | -2.52347800 | 1.43462600  | 0.00449200  |
| C | 2.03317100  | -3.48410500 | -1.45527300 | C | -2.55451200 | 2.10410600  | -1.24216900 |
| H | 2.95508600  | -3.08799300 | -1.03271900 | C | -3.01084800 | 1.45239100  | -2.52475700 |
| H | 1.56417800  | -4.14222300 | -0.71838300 | C | -2.16493600 | 3.43881800  | -1.28640600 |
| H | 2.27105100  | -4.05409200 | -2.35501300 | C | -1.75606400 | 4.12693400  | -0.14474100 |
|   |             |             |             | C | -1.29243900 | 5.55362200  | -0.24721100 |
| P |             |             |             | C | -1.74501700 | 3.44351400  | 1.06866900  |
| P | -3.00385700 | -0.31015900 | -0.06586600 | C | -2.11269400 | 2.10016800  | 1.17619700  |
| C | -2.79709400 | -1.34013700 | 1.38743600  | C | -2.00892200 | 1.45044700  | 2.53320600  |
| C | -3.83193400 | -1.89892900 | 2.14475500  | C | -4.68597600 | -0.54211900 | -0.67996100 |
| C | -3.53892100 | -2.83448000 | 3.14089900  | C | -4.91389700 | -1.53354900 | -1.65900000 |
| C | -2.23241100 | -3.26706900 | 3.38243900  | C | -3.82410300 | -2.44551700 | -2.16338000 |
| C | -1.18874200 | -2.73653300 | 2.62514800  | C | -6.20623700 | -1.67704600 | -2.15585400 |

|   |             |             |             |   |             |             |             |
|---|-------------|-------------|-------------|---|-------------|-------------|-------------|
| C | -7.26371200 | -0.88288100 | -1.70875200 | H | -3.32373500 | -2.97255200 | -1.34363500 |
| C | -8.63921400 | -1.04236900 | -2.29629600 | H | -3.04875900 | -1.90328200 | -2.71667600 |
| C | -7.01391900 | 0.05779400  | -0.71157600 | H | -6.39338900 | -2.43667500 | -2.91068900 |
| C | -5.73832100 | 0.24622100  | -0.17887000 | H | -8.71370500 | -0.50303400 | -3.24660500 |
| C | -5.54679700 | 1.27194100  | 0.91108600  | H | -9.40615800 | -0.64592100 | -1.62751800 |
| H | -4.86251700 | -1.62069200 | 1.94365900  | H | -8.86373100 | -2.09268600 | -2.49822100 |
| H | -4.35282700 | -3.25253400 | 3.72302800  | H | -7.83418100 | 0.66055200  | -0.32953600 |
| H | -2.04089800 | -4.01727000 | 4.14308000  | H | -6.50198500 | 1.48117700  | 1.39704500  |
| H | 0.97203600  | -4.41240100 | 3.89075300  | H | -4.85306600 | 0.92800500  | 1.68545000  |
| H | 3.32313500  | -4.14048600 | 3.13630600  | H | -5.15703700 | 2.21473100  | 0.51414400  |
| H | 3.92876400  | -2.53414400 | 1.40135300  | H | -2.11597300 | -0.87166200 | -0.99969200 |
| H | -2.66761000 | 2.03729400  | -3.38021800 | C | 0.12345100  | -2.32974500 | -2.89755800 |
| H | -2.61123300 | 0.44140200  | -2.64860800 | C | -0.40182000 | -1.06277700 | -3.01730700 |
| H | -4.10332900 | 1.38973400  | -2.57443200 | C | 0.26448700  | -0.25438900 | -2.05225100 |
| H | -2.17609700 | 3.95427600  | -2.24368000 | C | 1.18930100  | -1.03643100 | -1.37387400 |
| H | -1.24481000 | 6.03145500  | 0.73288900  | N | 1.07010700  | -2.30392600 | -1.91070900 |
| H | -0.29035400 | 5.59078600  | -0.68681000 | H | -0.07349100 | -3.23844800 | -3.44942400 |
| H | -1.95734200 | 6.13627000  | -0.89064200 | H | -1.12314900 | -0.74803700 | -3.76073200 |
| H | -1.40915300 | 3.96068500  | 1.96458400  | H | 0.09608300  | 0.80170200  | -1.87989900 |
| H | -1.85081000 | 2.21518500  | 3.29499700  | C | 1.84991300  | -3.46800800 | -1.53747400 |
| H | -1.15656700 | 0.76376600  | 2.57940700  | H | 2.86390600  | -3.17045800 | -1.26755400 |
| H | -2.90505900 | 0.88709600  | 2.80505200  | H | 1.40635200  | -3.99639200 | -0.68745200 |
| H | -4.24390800 | -3.19780500 | -2.83329500 | H | 1.90361400  | -4.14543000 | -2.39247700 |

## 7. Coordinates of intermediates and transition states involved in Figure 5

|       |             |             |             |   |             |             |             |
|-------|-------------|-------------|-------------|---|-------------|-------------|-------------|
| CH4   |             |             |             | C | -2.05253300 | -0.84483300 | -1.00023800 |
| N1_TS |             |             |             | C | -2.26813200 | -3.00978700 | 0.71217100  |
| C     | -0.93139800 | 2.53104300  | -0.02723600 | C | -3.14634200 | -1.71627800 | -1.06209500 |
| C     | -0.02408800 | 1.55535600  | -0.45292700 | C | -3.29849300 | -2.78820700 | -0.19234700 |
| C     | 0.74295100  | 1.89280800  | -1.58009600 | C | 1.69750400  | -0.37113000 | 0.13713400  |
| C     | 0.56687200  | 3.09353700  | -2.25905400 | C | 2.08490800  | -1.41671500 | -0.73954100 |
| C     | -0.37247000 | 4.02419000  | -1.81593000 | C | 2.74613600  | 0.31490700  | 0.79933600  |
| C     | -1.11845300 | 3.74857300  | -0.67668300 | C | 3.42449900  | -1.80031400 | -0.84655500 |
| H     | 1.48696000  | 1.18368100  | -1.93544700 | C | 4.07411000  | -0.09936300 | 0.67109600  |
| H     | 1.16753500  | 3.31119800  | -3.13688100 | C | 4.43747300  | -1.17567500 | -0.12815100 |
| H     | -0.51246300 | 4.96147400  | -2.34441900 | C | 1.11453900  | -2.16435000 | -1.63058200 |
| H     | -1.84129400 | 4.46952600  | -0.30333300 | H | 0.52873200  | -2.90513600 | -1.07777700 |
| H     | -0.89206600 | 1.16890200  | 1.53404400  | H | 0.39743200  | -1.49621000 | -2.11234000 |
| B     | 0.13761600  | 0.10730900  | 0.28146800  | H | 1.66529800  | -2.68997600 | -2.41489300 |
| N     | -1.66459700 | 2.20513200  | 1.18376900  | C | 5.86724300  | -1.64124900 | -0.22127400 |
| C     | -1.05980700 | -0.99010200 | 0.00838300  | H | 6.08452400  | -2.05921200 | -1.20778600 |
| C     | -1.16347400 | -2.16064600 | 0.80887600  | H | 6.56504900  | -0.82070800 | -0.03517300 |
|       |             |             |             | H | 6.07323000  | -2.42254300 | 0.51838800  |

|      |             |             |             |   |             |             |             |
|------|-------------|-------------|-------------|---|-------------|-------------|-------------|
| C    | -1.99195300 | 0.17059600  | -2.12907000 | H | -1.85715100 | 0.66791600  | 1.13645700  |
| H    | -2.22472200 | 1.19555200  | -1.82513700 | B | 0.32627900  | 0.12908200  | 0.63584100  |
| H    | -1.00255200 | 0.20464700  | -2.59018400 | N | -2.29773100 | 1.55346600  | 0.83874700  |
| H    | -2.70738100 | -0.11215300 | -2.90515300 | C | -0.87086500 | -0.94992400 | 0.15354300  |
| C    | -4.47921900 | -3.71979000 | -0.28334400 | C | -1.52414400 | -1.83208200 | 1.05206500  |
| H    | -5.31908300 | -3.24464100 | -0.79624800 | C | -1.35256700 | -0.98180700 | -1.18638000 |
| H    | -4.22208100 | -4.62751800 | -0.83940600 | C | -2.68531000 | -2.52589100 | 0.68149400  |
| H    | -4.81624200 | -4.03010000 | 0.70948200  | C | -2.48687500 | -1.71737400 | -1.53785200 |
| C    | -0.08224200 | -2.64416300 | 1.76003900  | C | -3.20994100 | -2.45677300 | -0.60270800 |
| H    | 0.90707400  | -2.27057200 | 1.49369200  | C | 1.89229500  | -0.32935900 | 0.33495300  |
| H    | -0.28546700 | -2.36506200 | 2.79869500  | C | 2.29072300  | -1.55545900 | -0.26357100 |
| H    | -0.04095100 | -3.73647600 | 1.72412800  | C | 2.95862600  | 0.54372900  | 0.69953100  |
| H    | 3.68232200  | -2.61248500 | -1.52419400 | C | 3.63908500  | -1.82604400 | -0.53399900 |
| H    | -2.30892400 | -3.88672900 | 1.35722500  | C | 4.28997800  | 0.24326600  | 0.40257600  |
| H    | -3.89487300 | -1.56011100 | -1.83706500 | C | 4.65861400  | -0.93634800 | -0.23180800 |
| C    | -1.54781400 | 3.22737500  | 2.23182700  | C | 1.34813200  | -2.69021700 | -0.62121000 |
| H    | -1.92488800 | 2.81351200  | 3.17074000  | H | 0.70561300  | -2.97380700 | 0.21394500  |
| H    | -0.49647100 | 3.49637500  | 2.35070500  | H | 0.68954400  | -2.45263600 | -1.45982200 |
| H    | -2.12378200 | 4.12521700  | 1.98235100  | H | 1.93101900  | -3.57063200 | -0.90368000 |
| C    | -3.06456100 | 1.80538900  | 0.97122900  | C | 6.09587800  | -1.22961500 | -0.57609300 |
| H    | -3.47749900 | 1.45985800  | 1.92266200  | H | 6.26422300  | -2.30368700 | -0.68883400 |
| H    | -3.65580600 | 2.65441300  | 0.60693500  | H | 6.38242200  | -0.75014200 | -1.51851000 |
| H    | -3.10370400 | 0.98653800  | 0.25423900  | H | 6.77304300  | -0.85749800 | 0.19780000  |
| H    | 4.84892800  | 0.45016700  | 1.20379900  | C | -0.61747900 | -0.31054800 | -2.33020600 |
| C    | 2.52904900  | 1.54191100  | 1.66213400  | H | -0.98681000 | 0.70027800  | -2.53651400 |
| H    | 3.40774200  | 2.18996600  | 1.60706500  | H | 0.45233800  | -0.23270400 | -2.12375300 |
| H    | 1.66433800  | 2.12636300  | 1.34252700  | H | -0.74720900 | -0.90268100 | -3.24111300 |
| H    | 2.38777800  | 1.27788300  | 2.71551500  | C | -4.47134800 | -3.18692100 | -0.98548700 |
| C    | -0.15667200 | 0.33221700  | 2.27378000  | H | -5.33869100 | -2.51721500 | -0.97269200 |
| H    | -1.02952900 | -0.17307900 | 2.70171500  | H | -4.39711400 | -3.60128500 | -1.99448000 |
| H    | 0.13999700  | 1.16111200  | 2.92783400  | H | -4.67934200 | -4.00734700 | -0.29432900 |
| H    | 0.67113100  | -0.36794100 | 2.32468300  | C | -0.93146600 | -2.21352100 | 2.39683900  |
|      |             |             |             | H | 0.14337100  | -2.03042500 | 2.41902200  |
| N1_P |             |             |             | H | -1.37882400 | -1.68298600 | 3.24335000  |
| C    | -1.28936900 | 2.17998800  | -0.06478600 | H | -1.09486700 | -3.28210600 | 2.56435800  |
| C    | -0.04621900 | 1.55162200  | -0.18442000 | H | 3.89624600  | -2.77705800 | -0.99699400 |
| C    | 0.82864600  | 2.21883900  | -1.06405900 | H | -3.15802500 | -3.18167500 | 1.41200100  |
| C    | 0.48924900  | 3.38254000  | -1.74236200 | H | -2.80747300 | -1.72321400 | -2.57930300 |
| C    | -0.77228700 | 3.95517000  | -1.58008900 | C | -2.56508300 | 2.37811400  | 2.04900200  |
| C    | -1.67795100 | 3.34318600  | -0.72633500 | H | -3.21314200 | 1.81451600  | 2.72226400  |
| H    | 1.81301500  | 1.78495100  | -1.22212000 | H | -1.61545400 | 2.59834100  | 2.53123000  |
| H    | 1.20950100  | 3.84594100  | -2.40968100 | H | -3.05580100 | 3.30032300  | 1.73708100  |
| H    | -1.04680200 | 4.86168200  | -2.10834500 | C | -3.56408500 | 1.17064700  | 0.15039800  |
| H    | -2.66773300 | 3.76984300  | -0.58382500 | H | -4.15159300 | 0.55573100  | 0.83412900  |

|       |             |             |             |      |             |             |             |
|-------|-------------|-------------|-------------|------|-------------|-------------|-------------|
| H     | -4.11173300 | 2.07467000  | -0.11478200 | H    | 4.95415200  | -3.67856200 | 0.61889200  |
| H     | -3.30585700 | 0.59224100  | -0.73496000 | H    | 5.75121300  | -2.12109400 | 0.80521600  |
| H     | 5.06483600  | 0.95216900  | 0.69114500  | C    | 1.42448800  | 3.16223600  | -2.30173200 |
| C     | 2.76725400  | 1.83120000  | 1.48040800  | H    | 1.96246200  | 2.72749700  | -3.14900600 |
| H     | 3.64173800  | 2.47597700  | 1.35754700  | H    | 0.37844700  | 3.31200700  | -2.57547800 |
| H     | 1.88959600  | 2.40056100  | 1.17739300  | H    | 1.87591000  | 4.13048000  | -2.05912200 |
| H     | 2.66548000  | 1.62097100  | 2.55010000  | C    | 2.89211400  | 1.98619200  | -0.76462600 |
| C     | 0.16191200  | 0.51917700  | 2.26291600  | H    | 3.41707200  | 1.47449400  | -1.57588200 |
| H     | -0.82157600 | 0.30904500  | 2.71137300  | H    | 3.39146800  | 2.93852800  | -0.54532900 |
| H     | 0.35960500  | 1.57990500  | 2.45315100  | H    | 2.90326900  | 1.34957100  | 0.11932700  |
| H     | 0.87390300  | -0.03121900 | 2.88678900  | C    | 0.73132100  | -3.01857100 | -0.09372800 |
| N2_TS |             |             |             | H    | 0.00084500  | -2.87481700 | -0.89379700 |
| C     | 0.65504800  | 2.61550300  | -0.04478400 | H    | 0.17131700  | -2.96810800 | 0.84475500  |
| C     | -0.21734400 | 1.61797100  | 0.39983200  | H    | 1.14391500  | -4.02662300 | -0.18583600 |
| C     | -1.03059100 | 1.97017000  | 1.48843300  | C    | 0.50686000  | -0.69692700 | 2.53727300  |
| C     | -0.96522900 | 3.22645800  | 2.08348900  | H    | 0.56866400  | 0.34978900  | 2.85144100  |
| C     | -0.08096700 | 4.19072300  | 1.60228800  | H    | 0.53041600  | -0.88555000 | 2.24078700  |
| C     | 0.73683400  | 3.88449900  | 0.52170600  | H    | 0.73280900  | -1.32161700 | 3.40567400  |
| H     | -1.73528100 | 1.23772100  | 1.87245100  | C    | 4.25931700  | -2.07797700 | -1.70231100 |
| H     | -1.60872000 | 3.45786900  | 2.92684600  | H    | 5.24073500  | -1.61243700 | -1.55526400 |
| H     | -0.02769900 | 5.17072200  | 2.06531300  | H    | 4.42682400  | -3.16008500 | -1.74187800 |
| H     | 1.43559100  | 4.62085400  | 0.13309400  | H    | 3.87945700  | -1.76319400 | -2.67733700 |
| H     | 0.74855100  | 1.12554600  | -1.54624900 | C    | 5.27244700  | 0.63099500  | -0.45808800 |
| B     | -0.19776500 | 0.14623900  | -0.31457900 | H    | 5.88253600  | 0.39244600  | -1.33668400 |
| N     | 1.49518700  | 2.23150800  | -1.16794500 | H    | 5.93265900  | 0.55979400  | 0.41385600  |
| C     | 1.15610600  | -0.66909400 | 0.06717600  | H    | 4.94461400  | 1.66915700  | -0.54694600 |
| C     | 2.09976400  | -1.05554500 | -0.89537800 | H    | -3.30085700 | -3.56957500 | -0.04478300 |
| C     | 1.46111000  | -0.99592800 | 1.40578000  | H    | -2.66573600 | 1.27005700  | -0.44615100 |
| C     | 3.29835300  | -1.70591300 | -0.60271200 | H    | 2.87279000  | -1.89303700 | 2.74595000  |
| C     | 2.66035900  | -1.64634300 | 1.70655300  | H    | 1.90587700  | -0.84101700 | -1.94505100 |
| C     | 3.59216500  | -2.00291000 | 0.73453700  | C    | -0.16465200 | 0.40269200  | -2.24887200 |
| C     | 1.63675900  | -0.60455600 | -0.24143100 | H    | 0.53053100  | 0.66424200  | -3.06496900 |
| C     | 1.84670100  | -1.99824900 | -0.14990700 | H    | -1.09258700 | 0.94690800  | -2.42880800 |
| C     | 2.79045100  | 0.19241200  | -0.34675700 | H    | -0.33699500 | -0.66491700 | -2.38087800 |
| C     | 3.15590600  | -2.49339300 | -0.12516600 | N2_P |             |             |             |
| C     | 4.09294800  | -0.29850800 | -0.33648700 | C    | 1.00125900  | 2.41225900  | -0.03990600 |
| C     | 4.28164900  | -1.68151500 | -0.20974700 | C    | -0.14404600 | 1.62851600  | 0.12914100  |
| C     | 5.66656200  | -2.27219200 | -0.17913300 | C    | -1.07215600 | 2.20114700  | 1.02187100  |
| H     | 6.22615800  | -2.02796900 | -1.08906600 | C    | -0.87373000 | 3.42549900  | 1.65045100  |
| H     | 5.62796300  | -3.35987000 | -0.08783700 | C    | 0.28855200  | 4.16042600  | 1.42396600  |
| H     | 6.24823400  | -1.88240200 | 0.66390900  | C    | 1.24724700  | 3.64111100  | 0.56669800  |
| C     | 4.87285000  | -2.70182500 | 1.10875000  | H    | -1.97822300 | 1.64543900  | 1.24117900  |
| H     | 4.93217700  | -2.86097700 | 2.18761200  | H    | -1.62803900 | 3.80770900  | 2.33166500  |

|   |             |             |             |       |             |             |             |
|---|-------------|-------------|-------------|-------|-------------|-------------|-------------|
| H | 0.45022700  | 5.11629400  | 1.91030800  | H     | 3.58940800  | -2.35720600 | -2.71135900 |
| H | 2.16853500  | 4.18800500  | 0.38080500  | C     | -5.34388500 | 0.88323300  | -0.81441800 |
| H | 1.70556900  | 0.96416600  | -1.23913000 | H     | -5.98171100 | 0.48860000  | -1.61376200 |
| B | -0.31276700 | 0.12235100  | -0.59813000 | H     | -5.99698900 | 1.07205400  | 0.04558900  |
| N | 2.06560500  | 1.88236600  | -0.93668000 | H     | -4.94233100 | 1.84279600  | -1.14869100 |
| C | 1.00088500  | -0.74533800 | -0.07985800 | H     | -3.66883000 | -3.23806800 | 0.56419800  |
| C | 1.90150100  | -1.30800200 | -1.00136900 | H     | -2.70270400 | 1.31496200  | -0.94437300 |
| C | 1.35198200  | -0.88221700 | 1.28428200  | H     | 2.78058700  | -1.63052000 | 2.69827300  |
| C | 3.09527500  | -1.94913700 | -0.65319000 | H     | 1.65642200  | -1.26070300 | -2.06276100 |
| C | 2.53881600  | -1.52776300 | 1.64066400  | C     | -0.29277400 | 0.29994200  | -2.25133900 |
| C | 3.42847500  | -2.05398400 | 0.70250400  | H     | 0.63144400  | 0.64223400  | -2.74998900 |
| C | -1.79573800 | -0.51925400 | -0.28863800 | H     | -1.07779800 | 0.99490700  | -2.57008000 |
| C | -2.10991900 | -1.83411000 | 0.11725000  | H     | -0.52555000 | -0.66363900 | -2.72090700 |
| C | -2.89878600 | 0.30263200  | -0.58870900 |       |             |             |             |
| C | -3.45120000 | -2.21919700 | 0.24590800  | N3_TS |             |             |             |
| C | -4.23304400 | -0.07471800 | -0.46898800 | C     | -0.35534600 | 2.91545700  | 0.28702900  |
| C | -4.51962000 | -1.37309200 | -0.02613300 | C     | -0.18782600 | 1.59466500  | 0.69130100  |
| C | -5.94257200 | -1.84295300 | 0.12856000  | C     | -0.25177900 | 1.33397100  | 2.06701200  |
| H | -6.48913800 | -1.78795900 | -0.81996200 | C     | -0.46473500 | 2.35593300  | 2.98386200  |
| H | -5.97801300 | -2.87763900 | 0.47723300  | C     | -0.63192200 | 3.67047300  | 2.54650800  |
| H | -6.49454600 | -1.22599000 | 0.84696900  | C     | -0.57615600 | 3.95544400  | 1.18800900  |
| C | 4.69769600  | -2.73917100 | 1.13770000  | H     | -0.13156200 | 0.31149100  | 2.41962700  |
| H | 4.80156100  | -2.72030100 | 2.22477400  | H     | -0.50574100 | 2.13071000  | 4.04483000  |
| H | 4.71557000  | -3.78650300 | 0.81620000  | H     | -0.80310900 | 4.46725200  | 3.26275400  |
| H | 5.58446700  | -2.26172300 | 0.70526000  | H     | -0.69957800 | 4.97437600  | 0.83026200  |
| C | 2.25835300  | 2.72076300  | -2.14925900 | H     | -0.14193400 | 1.68767200  | -1.49609000 |
| H | 2.93444200  | 2.20279000  | -2.83184100 | B     | 0.01103600  | 0.36095900  | -0.32779200 |
| H | 1.28560900  | 2.86937200  | -2.61575200 | N     | -0.25176900 | 3.13201800  | -1.13906600 |
| H | 2.68457700  | 3.67906900  | -1.85155800 | C     | 1.46348400  | -0.34055700 | -0.22659900 |
| C | 3.34690300  | 1.60200000  | -0.22834500 | C     | 1.69107400  | -1.64890000 | -0.65300300 |
| H | 4.03169600  | 1.12266200  | -0.92979300 | C     | 2.59874100  | 0.33013800  | 0.22337600  |
| H | 3.76315500  | 2.54220500  | 0.13318300  | C     | 2.92649500  | -2.27517500 | -0.59832800 |
| H | 3.12989400  | 0.92558600  | 0.59952300  | C     | 3.85736600  | -0.25725400 | 0.29450700  |
| C | -1.07049900 | -2.89857200 | 0.39537700  | C     | 4.02074300  | -1.57164800 | -0.11278800 |
| H | -0.34047700 | -2.97389500 | -0.41385600 | C     | -1.30333800 | -0.57692900 | -0.17302400 |
| H | -0.50394500 | -2.70018700 | 1.31044900  | C     | -1.35787700 | -1.70404300 | 0.64023700  |
| H | -1.55348500 | -3.87289500 | 0.51033100  | C     | -2.51950600 | -0.19855600 | -0.73052200 |
| C | 0.46285800  | -0.36446900 | 2.39113900  | C     | -2.51772100 | -2.43999700 | 0.84721500  |
| H | 0.65490600  | 0.69383300  | 2.60237500  | C     | -3.70187000 | -0.90297600 | -0.55780000 |
| H | -0.59369600 | -0.45041900 | 2.12134700  | C     | -3.69791700 | -2.04000600 | 0.23762600  |
| H | 0.63380100  | -0.92561000 | 3.31451200  | C     | -1.41555200 | 3.78724000  | -1.74034900 |
| C | 3.99925900  | -2.52547300 | -1.71279200 | H     | -1.32964200 | 3.73040300  | -2.82963200 |
| H | 5.00190000  | -2.08270100 | -1.67616600 | H     | -2.31869500 | 3.26519500  | -1.42486700 |
| H | 4.12973700  | -3.60550200 | -1.58219700 | H     | -1.48257300 | 4.84413400  | -1.45131900 |

|      |             |             |             |       |             |             |             |
|------|-------------|-------------|-------------|-------|-------------|-------------|-------------|
| C    | 1.01235200  | 3.77482300  | -1.51661500 | C     | -3.02732200 | -2.46694100 | 0.46225100  |
| H    | 1.11089000  | 3.76022300  | -2.60615600 | C     | -3.57951000 | 1.70817300  | -0.30896500 |
| H    | 1.05206000  | 4.81503400  | -1.16839900 | H     | -4.11273400 | 1.30336800  | -1.17088100 |
| H    | 1.83638500  | 3.21865700  | -1.06499900 | H     | -3.39678200 | 0.92415100  | 0.42500200  |
| F    | -4.83190800 | -0.49399100 | -1.13270400 | H     | -4.13948400 | 2.52658300  | 0.14329000  |
| F    | -4.81832500 | -2.73064600 | 0.42478700  | C     | -2.39919000 | 3.37255800  | -1.70868200 |
| F    | -2.50900300 | -3.51631900 | 1.63113000  | H     | -2.99684900 | 3.05328800  | -2.56409200 |
| F    | -0.26253000 | -2.11987100 | 1.29354000  | H     | -2.88908400 | 4.19553200  | -1.18919600 |
| F    | -2.59192800 | 0.92288400  | -1.47695800 | H     | -1.40123800 | 3.66998500  | -2.02820700 |
| F    | 0.68182900  | -2.36388500 | -1.17301000 | F     | -4.14079800 | -2.02656200 | -1.57129700 |
| F    | 3.07553800  | -3.53143400 | -1.01284000 | F     | -3.97733800 | -3.32039800 | 0.83525200  |
| F    | 5.21661700  | -2.14782700 | -0.05890800 | F     | -1.88614500 | -2.79100600 | 2.49378400  |
| F    | 4.90376000  | 0.43767100  | 0.73743900  | F     | 0.00838400  | -1.05639300 | 1.76976700  |
| F    | 2.53919000  | 1.62026300  | 0.58854700  | F     | -2.30396900 | -0.27264600 | -2.28687100 |
| C    | 0.09189300  | 0.69265200  | -2.26659600 | F     | 1.15489100  | -2.37468400 | -0.32437900 |
| H    | 1.09258000  | 0.95019300  | -2.61989700 | F     | 3.67503800  | -3.11374600 | -0.09422600 |
| H    | -0.01587100 | -0.38984500 | -2.30856500 | F     | 5.68221500  | -1.27185300 | -0.09943200 |
| H    | -0.66878200 | 1.08544700  | -2.95069300 | F     | 5.06894800  | 1.37503700  | -0.34772400 |
| N3_P |             |             |             | F     | 2.53934500  | 2.15681200  | -0.57138800 |
| C    | -1.32526600 | 2.50694500  | 0.35521100  | C     | 0.19617900  | 1.02683200  | -2.22607200 |
| C    | -0.17272500 | 1.72478700  | 0.43935400  | H     | 1.00581400  | 1.75429100  | -2.34060800 |
| C    | 0.61125900  | 1.99701300  | 1.57403300  | H     | 0.43449000  | 0.17242500  | -2.86855500 |
| C    | 0.28212200  | 2.97897500  | 2.50027900  | H     | -0.68742500 | 1.48341700  | -2.69337000 |
| C    | -0.87035200 | 3.74699500  | 2.34202900  | N4_TS |             |             |             |
| C    | -1.69505100 | 3.50308100  | 1.25366700  | C     | -2.50881400 | -0.11222600 | -0.36872600 |
| H    | 1.50603000  | 1.40450600  | 1.73696700  | C     | -1.87770000 | 0.74958000  | 0.52978300  |
| H    | 0.92806200  | 3.14753000  | 3.35618500  | C     | -2.30808700 | 2.08099300  | 0.53720400  |
| H    | -1.12893200 | 4.51738700  | 3.06016800  | C     | -3.32113600 | 2.51541000  | -0.31320000 |
| H    | -2.60957900 | 4.07513800  | 1.11892600  | C     | -3.93565100 | 1.62379600  | -1.19153300 |
| H    | -1.80815200 | 1.47276100  | -1.30907900 | C     | -3.53034500 | 0.29326000  | -1.22218500 |
| B    | 0.16750100  | 0.52043500  | -0.65167100 | H     | -1.84083800 | 2.78099300  | 1.22369600  |
| N    | -2.25801500 | 2.22460300  | -0.76962600 | H     | -3.64002100 | 3.55290900  | -0.28965200 |
| C    | 1.69069700  | -0.05466400 | -0.41663900 | H     | -4.72708800 | 1.96408200  | -1.85145900 |
| C    | 2.06822100  | -1.39078400 | -0.31230900 | H     | -3.99807400 | -0.41021100 | -1.90626700 |
| C    | 2.76501500  | 0.83607500  | -0.43885900 | H     | -1.32559100 | -1.33906200 | 0.96894300  |
| C    | 3.38849800  | -1.81539000 | -0.20082100 | B     | -0.72093700 | 0.18451500  | 1.49240200  |
| C    | 4.09689200  | 0.46121300  | -0.32896300 | N     | -2.00322300 | -1.47400900 | -0.33997500 |
| C    | 4.41299800  | -0.88348600 | -0.20736900 | C     | 0.73410100  | 0.09606100  | 0.78093900  |
| C    | -0.99491500 | -0.62173800 | -0.32404800 | C     | 1.38444700  | 1.29447200  | 0.49434800  |
| C    | -0.98771900 | -1.28461100 | 0.90552900  | C     | 1.43021300  | -1.04724100 | 0.41083100  |
| C    | -2.09011100 | -0.93339800 | -1.11658300 | C     | 2.63337300  | 1.36684200  | -0.10659300 |
| C    | -1.95744800 | -2.19006200 | 1.30759000  | C     | 2.68002500  | -1.02675600 | -0.19733200 |
| C    | -3.09904800 | -1.82421100 | -0.76099700 | C     | 3.28798900  | 0.19216800  | -0.45464800 |

|      |             |             |             |       |             |             |             |
|------|-------------|-------------|-------------|-------|-------------|-------------|-------------|
| C    | -3.04612500 | -2.49325100 | -0.18630300 | H     | 0.20949000  | -2.61785000 | 1.45572000  |
| H    | -2.57088400 | -3.46446300 | -0.02139800 | H     | 1.46518700  | -1.84636500 | 2.48546400  |
| H    | -3.66696800 | -2.24290400 | 0.67620200  | H     | 0.19122800  | -0.84867600 | 1.72249700  |
| H    | -3.68264000 | -2.56380500 | -1.07658900 | F     | -0.74795200 | 2.57596300  | -0.65976800 |
| C    | -1.13389700 | -1.76746200 | -1.48991000 | F     | -3.11804600 | 2.54006100  | 0.56605300  |
| H    | -0.63329600 | -2.72495400 | -1.33107400 | F     | -4.36349900 | 0.18128400  | 1.09408000  |
| H    | -1.72076100 | -1.80752200 | -2.41655400 | F     | -3.16119400 | -2.16646400 | 0.37341600  |
| H    | -0.38551200 | -0.97917400 | -1.57858400 | F     | -0.79778600 | -2.15773800 | -0.83984800 |
| F    | 0.79162100  | 2.45425000  | 0.80777400  | H     | 0.67347300  | 1.32167300  | -2.39488100 |
| F    | 3.20820500  | 2.54248800  | -0.35588200 | C     | 1.13304200  | -0.93838500 | -2.63709600 |
| F    | 4.48367300  | 0.23627300  | -1.03668000 | H     | 0.33115300  | -1.08809500 | -3.36813400 |
| F    | 3.29122400  | -2.16300300 | -0.53487800 | H     | 2.04144600  | -0.71150500 | -3.20609700 |
| F    | 0.89007100  | -2.26968600 | 0.60611200  | H     | 1.29702300  | -1.93521800 | -2.19638600 |
| H    | -0.66175500 | 0.79808700  | 2.52217200  |       |             |             |             |
| C    | -1.15274800 | -1.46566700 | 2.26482500  | N5_TS |             |             |             |
| H    | -0.25829200 | -1.42413200 | 2.88278700  | B     | 0.22682300  | -0.10710400 | -0.05774700 |
| H    | -2.04170500 | -1.22539600 | 2.84620500  | C     | -0.75152500 | -0.24821400 | 1.22780200  |
| H    | -1.21633000 | -2.52173700 | 1.96635700  | C     | -0.14876900 | -0.29418800 | 2.49598600  |
|      |             |             |             | H     | 0.93242200  | -0.27807100 | 2.57136000  |
| N4_P |             |             |             | C     | -0.88641900 | -0.31253300 | 3.67088500  |
| C    | 2.36087700  | -0.20508400 | 0.40569500  | H     | -0.37714500 | -0.33870400 | 4.62897500  |
| C    | 1.93689000  | 0.69340900  | -0.57159100 | C     | -2.27610600 | -0.28525600 | 3.61409400  |
| C    | 2.58219800  | 1.93999700  | -0.52081800 | H     | -2.86872100 | -0.28662400 | 4.52309900  |
| C    | 3.56261700  | 2.23684200  | 0.42012900  | C     | -2.90570000 | -0.26511500 | 2.37775200  |
| C    | 3.94438900  | 1.28980000  | 1.37059500  | H     | -3.98646600 | -0.26012100 | 2.33215200  |
| C    | 3.33258300  | 0.04291000  | 1.36928500  | C     | -2.15473700 | -0.25949100 | 1.19575500  |
| H    | 2.28817400  | 2.69021000  | -1.24899300 | N     | -2.78907700 | -0.31919800 | -0.11406400 |
| H    | 4.03345400  | 3.21525500  | 0.41979600  | C     | -3.45119000 | -1.66621800 | -0.39539100 |
| H    | 4.70693400  | 1.51893200  | 2.10714000  | C     | -3.87275400 | -1.69851900 | -1.87499800 |
| H    | 3.60906800  | -0.70697500 | 2.10675600  | H     | -2.98006000 | -1.72688200 | -2.50973800 |
| H    | 1.05982400  | -1.49957900 | -0.41140700 | H     | -4.40652600 | -2.63847000 | -2.04980900 |
| B    | 0.77308300  | 0.35004300  | -1.68072000 | C     | -4.72526400 | -0.50194400 | -2.27904100 |
| N    | 1.68088300  | -1.52720900 | 0.41110800  | H     | -5.67481100 | -0.50206200 | -1.73093200 |
| C    | -0.67290500 | 0.22145300  | -0.87940100 | H     | -4.98032000 | -0.56509900 | -3.34121300 |
| C    | -1.31900500 | 1.38400200  | -0.45463900 | C     | -3.94738700 | 0.77878600  | -2.00354700 |
| C    | -1.36059500 | -0.94425200 | -0.56998800 | H     | -4.52925300 | 1.66169700  | -2.28839700 |
| C    | -2.54728700 | 1.39402400  | 0.19407300  | H     | -3.04364000 | 0.78294100  | -2.62442600 |
| C    | -2.58355200 | -0.99585700 | 0.08892200  | C     | -3.54326700 | 0.93516800  | -0.52833700 |
| C    | -3.18970900 | 0.19181400  | 0.46445100  | C     | -4.78862800 | 1.27953100  | 0.31012400  |
| C    | 2.61046200  | -2.66705500 | 0.18499500  | H     | -5.56840000 | 0.52079400  | 0.28925000  |
| H    | 2.02171300  | -3.57851600 | 0.06857200  | H     | -5.21968000 | 2.19714600  | -0.10162500 |
| H    | 3.17891500  | -2.46109200 | -0.72106700 | H     | -4.52525100 | 1.48976900  | 1.34767700  |
| H    | 3.28076700  | -2.75465900 | 1.03995000  | C     | -2.60708800 | 2.13929800  | -0.39229100 |
| C    | 0.82280200  | -1.72949400 | 1.61230900  | H     | -1.67867800 | 2.01434200  | -0.95123600 |



|      |             |             |             |   |             |             |             |
|------|-------------|-------------|-------------|---|-------------|-------------|-------------|
| H    | -2.35431000 | 2.32898600  | 0.65154700  | H | -0.14373700 | -1.02337700 | 4.34761700  |
| H    | -3.11699700 | 3.02276200  | -0.78722500 | C | -2.09507100 | -0.87239500 | 3.44841800  |
| C    | -4.67098800 | -2.02755200 | 0.47375400  | H | -2.64217900 | -1.02159900 | 4.37302900  |
| H    | -4.40415300 | -2.11625600 | 1.52697000  | C | -2.78192300 | -0.68194900 | 2.26077800  |
| H    | -5.01719000 | -3.01358700 | 0.14932500  | H | -3.86320900 | -0.68781300 | 2.26803300  |
| H    | -5.51348700 | -1.34542900 | 0.37617200  | C | -2.07398700 | -0.48928600 | 1.06933900  |
| C    | -2.41510900 | -2.76612600 | -0.14311400 | N | -2.86650200 | -0.33251000 | -0.18713800 |
| H    | -1.49113000 | -2.59911800 | -0.69265500 | C | -3.67792000 | -1.59411400 | -0.62016100 |
| H    | -2.83272200 | -3.72223200 | -0.47181400 | C | -4.12833900 | -1.33501500 | -2.06471400 |
| H    | -2.17337600 | -2.84817100 | 0.91950100  | H | -3.23496200 | -1.29081500 | -2.70349500 |
| C    | 0.87803300  | 1.38287100  | -0.23575900 | H | -4.70227400 | -2.20806800 | -2.39013500 |
| C    | 0.59122900  | 2.48966300  | 0.56517700  | C | -4.92376500 | -0.04801600 | -2.23453100 |
| F    | -0.30009200 | 2.42595400  | 1.56231100  | H | -5.84593100 | -0.08016000 | -1.64298500 |
| C    | 1.19608700  | 3.73285500  | 0.40518800  | H | -5.22809600 | 0.06639100  | -3.27856300 |
| F    | 0.86362100  | 4.74815900  | 1.20081300  | C | -4.05159400 | 1.13143200  | -1.82195900 |
| C    | 2.15410900  | 3.91283300  | -0.57844800 | H | -4.58787800 | 2.07948200  | -1.93155900 |
| F    | 2.74179800  | 5.09305600  | -0.74220500 | H | -3.18218600 | 1.18441500  | -2.49126800 |
| C    | 2.49340100  | 2.84087000  | -1.39046100 | C | -3.55354500 | 1.06129400  | -0.37111900 |
| F    | 3.42087500  | 2.98732600  | -2.33470600 | C | -4.69217700 | 1.34575900  | 0.60870900  |
| C    | 1.86588200  | 1.61936000  | -1.19626600 | H | -5.60356700 | 0.78250100  | 0.41396400  |
| F    | 2.27775100  | 0.62488300  | -2.00410200 | H | -4.94135700 | 2.40365200  | 0.48849300  |
| C    | 1.41983700  | -1.23892500 | -0.02988100 | H | -4.38506600 | 1.20812900  | 1.64530800  |
| C    | 2.57068800  | -1.00650800 | 0.72725900  | C | -2.47777400 | 2.12206200  | -0.15311100 |
| F    | 2.72038900  | 0.14378200  | 1.40825300  | H | -1.58713900 | 1.93751700  | -0.75752200 |
| C    | 3.62258400  | -1.90413400 | 0.84742600  | H | -2.17589300 | 2.18131200  | 0.89258700  |
| F    | 4.68204800  | -1.60828900 | 1.59715500  | H | -2.89333900 | 3.08793600  | -0.45327600 |
| C    | 3.56916600  | -3.11233000 | 0.17007200  | C | -4.86717900 | -1.92604200 | 0.28589200  |
| F    | 4.56429800  | -3.98744700 | 0.26884000  | H | -4.53289800 | -2.35279600 | 1.23178400  |
| C    | 2.46144800  | -3.38931900 | -0.61296600 | H | -5.44660900 | -2.69762800 | -0.22876100 |
| F    | 2.38931500  | -4.53740800 | -1.28417100 | H | -5.53905200 | -1.09592700 | 0.48891000  |
| C    | 1.43149400  | -2.45971100 | -0.69976000 | C | -2.74051600 | -2.79937600 | -0.60174000 |
| F    | 0.42236100  | -2.81440100 | -1.51817500 | H | -1.94067400 | -2.71296200 | -1.33463300 |
| H    | -1.45649200 | -0.30453900 | -0.86034500 | H | -3.33511800 | -3.68146500 | -0.85531100 |
| C    | -0.58854500 | -0.26432000 | -1.81332300 | H | -2.29190500 | -2.95585200 | 0.38065600  |
| H    | -0.88858000 | 0.67232300  | -2.28394500 | C | 0.92840500  | 1.42422900  | -0.16344000 |
| H    | 0.45812700  | -0.41006900 | -2.06832800 | C | 0.61669100  | 2.37723600  | 0.80273600  |
| H    | -1.07790600 | -1.11095900 | -2.29944000 | F | -0.20711800 | 2.09979700  | 1.83417900  |
| N5_P |             |             |             | C | 1.09629900  | 3.68524000  | 0.79743500  |
| B    | 0.35086000  | -0.13091100 | -0.28285700 | F | 0.72584200  | 4.54201100  | 1.75258000  |
| C    | -0.67306800 | -0.45481000 | 0.99668900  | C | 1.96268100  | 4.09445300  | -0.19955800 |
| C    | -0.03229100 | -0.66991000 | 2.23489700  | F | 2.43780200  | 5.33866200  | -0.22058300 |
| H    | 1.05401900  | -0.64863400 | 2.24931500  | C | 2.33600200  | 3.17984700  | -1.17411800 |
| C    | -0.70254400 | -0.87303900 | 3.42943900  | F | 3.19085400  | 3.54212000  | -2.13192400 |
|      |             |             |             | C | 1.82484000  | 1.89227600  | -1.12876100 |

|       |             |             |             |      |             |             |             |
|-------|-------------|-------------|-------------|------|-------------|-------------|-------------|
| F     | 2.29498900  | 1.05566100  | -2.06982500 | H    | 1.57508400  | -1.88703700 | 2.64128600  |
| C     | 1.60841700  | -1.21222200 | -0.15316100 | C    | 0.29095600  | 0.40653900  | 2.44421600  |
| C     | 2.93670000  | -0.92773000 | 0.16111600  | H    | 0.86983000  | 0.30059200  | 3.36647500  |
| F     | 3.33447400  | 0.31601100  | 0.47218000  | H    | 0.14064200  | 1.47024100  | 2.25352400  |
| C     | 3.94509800  | -1.88633100 | 0.21513500  | H    | -0.69079800 | -0.04579400 | 2.60294400  |
| F     | 5.19452300  | -1.53286400 | 0.51985100  | C    | 1.07866600  | -1.79331400 | -1.67011000 |
| C     | 3.64783800  | -3.21571000 | -0.03264200 | H    | 0.07323500  | -2.19927500 | -1.78447900 |
| F     | 4.59864300  | -4.14645400 | 0.02289200  | H    | 1.57513200  | -1.88743700 | -2.64097900 |
| C     | 2.33737900  | -3.56185600 | -0.32458600 | H    | 1.63264700  | -2.41044100 | -0.96334200 |
| F     | 2.01403800  | -4.83873800 | -0.54274100 | C    | 0.29075800  | 0.40588800  | -2.44429700 |
| C     | 1.37120100  | -2.56761500 | -0.37027800 | H    | 0.14020700  | 1.46959500  | -2.25385000 |
| F     | 0.11807600  | -2.99515400 | -0.62637000 | H    | 0.86963000  | 0.29984800  | -3.36654600 |
| H     | -2.12482400 | -0.29903000 | -0.90048200 | H    | -0.69090200 | -0.04669900 | -2.60288600 |
| C     | -0.25836100 | -0.29931000 | -1.81518000 | B    | -1.36962300 | 2.41175000  | -0.00002500 |
| H     | -0.92777500 | 0.51088400  | -2.14461400 | H    | 0.18534300  | 1.49805600  | -0.00012700 |
| H     | 0.56813500  | -0.27344300 | -2.52686300 | H    | -1.70102900 | 2.98178200  | 1.01061200  |
| H     | -0.76336100 | -1.25459000 | -1.99727000 | H    | -1.70123500 | 2.98196400  | -1.01048200 |
| N6_TS |             |             |             | C    | 0.46307000  | 2.82516600  | -0.00041800 |
| C     | -1.89521900 | 0.89478900  | -0.00002800 | H    | 1.09367800  | 2.77974200  | 0.89009200  |
| C     | -1.08087200 | -0.23925700 | 0.00004700  | H    | 1.09252000  | 2.78038200  | -0.89176800 |
| C     | -1.61840300 | -1.53199600 | 0.00011400  | H    | 0.04090500  | 3.82837900  | 0.00030300  |
| C     | -2.99692700 | -1.70489300 | 0.00009800  | N6_P |             |             |             |
| C     | -3.83300300 | -0.58881600 | 0.00002000  | C    | -1.89770100 | 0.84965700  | -0.04067400 |
| C     | -3.28272100 | 0.68531700  | -0.00003900 | C    | -1.08139700 | -0.28332100 | 0.02458700  |
| H     | -0.97306600 | -2.40130700 | 0.00017900  | C    | -1.54919800 | -1.59986900 | 0.09525400  |
| H     | -3.41419100 | -2.70673400 | 0.00014700  | C    | -2.91722200 | -1.82475200 | 0.09265200  |
| H     | -4.91113500 | -0.71836200 | 0.00000600  | C    | -3.78457800 | -0.73259800 | 0.01690400  |
| H     | -3.93857800 | 1.55250600  | -0.00009500 | C    | -3.27833200 | 0.55564600  | -0.04817200 |
| C     | 1.04684300  | -0.29790400 | 1.30744100  | H    | -0.86902700 | -2.44029000 | 0.15587200  |
| C     | 1.04681900  | -0.29814000 | -1.30737900 | H    | -3.29998200 | -2.83834300 | 0.14733600  |
| C     | 2.48951300  | 0.23285600  | 1.24343000  | H    | -4.85827800 | -0.89603200 | 0.00899000  |
| C     | 2.48939300  | 0.23285700  | -1.24347100 | H    | -3.96208300 | 1.39835200  | -0.10371600 |
| C     | 3.24058200  | -0.22907000 | -0.00005500 | C    | 1.10354500  | -0.18221400 | 1.35904900  |
| H     | 3.00513300  | -0.08879900 | 2.15453400  | C    | 1.10364700  | -0.42867700 | -1.29987800 |
| H     | 2.47652800  | 1.32792900  | 1.25975200  | C    | 2.49812000  | 0.44781400  | 1.21546200  |
| H     | 3.00501100  | -0.08864000 | -2.15463200 | C    | 2.46619700  | 0.27763000  | -1.27677600 |
| H     | 2.47620200  | 1.32793200  | -1.25967500 | C    | 3.27084300  | -0.01967700 | -0.01442600 |
| H     | 4.25312000  | 0.18604000  | -0.00009400 | H    | 3.05150700  | 0.22621600  | 2.13388300  |
| H     | 3.35287500  | -1.31946000 | -0.00005800 | H    | 2.38682800  | 1.53820500  | 1.17201000  |
| N     | 0.35125200  | 0.04617600  | 0.00000700  | H    | 3.01467600  | -0.02593700 | -2.17427800 |
| C     | 1.07845100  | -1.79300100 | 1.67049400  | H    | 2.29976800  | 1.36078000  | -1.35430400 |
| H     | 0.07295200  | -2.19872300 | 1.78512500  | H    | 4.23183100  | 0.50063700  | -0.05935400 |
| H     | 1.63215800  | -2.41037900 | 0.96372800  | H    | 3.50197400  | -1.08903000 | 0.05411400  |

|       |             |             |             |   |             |             |             |
|-------|-------------|-------------|-------------|---|-------------|-------------|-------------|
| N     | 0.37916900  | -0.00312600 | 0.00090900  | C | 1.80711400  | -0.92724400 | 0.32984000  |
| C     | 1.19640700  | -1.63476700 | 1.82161500  | C | 2.28846000  | -2.99567900 | -0.96949500 |
| H     | 0.20934400  | -2.08911500 | 1.90900800  | C | 2.69988100  | -1.83102800 | -0.28702500 |
| H     | 1.83224600  | -2.26255900 | 1.19857800  | C | 1.99104900  | 0.64192000  | 3.29647500  |
| H     | 1.63581400  | -1.61939000 | 2.82309900  | H | 1.83471900  | -0.42774900 | 3.44438800  |
| C     | 0.29032400  | 0.60308700  | 2.39274100  | H | 1.33075000  | 1.20294600  | 3.96196500  |
| H     | 0.87347700  | 0.64960600  | 3.31690900  | H | 3.03311500  | 0.88809300  | 3.52503400  |
| H     | 0.07285000  | 1.62196000  | 2.06064200  | C | 1.82964200  | 2.44078300  | 1.69004800  |
| H     | -0.66129600 | 0.11094000  | 2.60430400  | H | 2.79088900  | 2.78824100  | 2.08681700  |
| C     | 1.27140700  | -1.93776200 | -1.47115800 | H | 1.02155200  | 2.95253000  | 2.22043000  |
| H     | 0.30991900  | -2.45004300 | -1.49188000 | H | 1.75504000  | 2.67021500  | 0.62850000  |
| H     | 1.73875800  | -2.09186900 | -2.44819200 | C | -0.47719500 | 1.45840700  | -0.27888600 |
| H     | 1.91497800  | -2.40525500 | -0.72817500 | C | -1.15403300 | 2.61898800  | 0.18976200  |
| C     | 0.25948800  | 0.08854600  | -2.46821100 | C | -0.77437100 | 3.89762500  | -0.22176300 |
| H     | -0.01810100 | 1.13638000  | -2.34007900 | H | -1.31544600 | 4.75636600  | 0.17428500  |
| H     | 0.85076000  | -0.00738100 | -3.38317200 | C | 0.24219500  | 4.10721400  | -1.14884000 |
| H     | -0.65773400 | -0.49294200 | -2.58066600 | C | 0.80264000  | 2.97434500  | -1.72332000 |
| B     | -1.49749000 | 2.45132300  | -0.00232300 | H | 1.53064700  | 3.09398800  | -2.52457800 |
| H     | 0.35741200  | 1.02775200  | -0.09248700 | C | 0.45260700  | 1.67542200  | -1.32994900 |
| H     | -1.75447900 | 2.78877900  | 1.14711900  | C | -2.39376400 | 2.57544600  | 1.06648100  |
| H     | -2.28831000 | 2.99830600  | -0.74866100 | H | -2.17780500 | 2.76479000  | 2.12245200  |
| C     | 0.01213800  | 3.03914800  | -0.37298200 | H | -2.92016800 | 1.62380900  | 0.98988100  |
| H     | 0.86178100  | 2.79176600  | 0.28831500  | H | -3.08309100 | 3.35880500  | 0.73866100  |
| H     | 0.36706300  | 2.89320600  | -1.40358500 | C | 0.67481200  | 5.49549700  | -1.54231600 |
| H     | -0.09056800 | 4.12323200  | -0.26231300 | H | 1.15178000  | 5.49820800  | -2.52560300 |
|       |             |             |             | H | 1.39573700  | 5.90171200  | -0.82447200 |
| N8_TS |             |             |             | H | -0.17616000 | 6.18137400  | -1.57240400 |
| C     | 3.50325800  | -3.72941200 | -1.49616900 | C | 1.07678400  | 0.59088800  | -2.19186600 |
| H     | 3.43275700  | -3.90139300 | -2.57408100 | H | 1.08946400  | 0.93807500  | -3.22949800 |
| H     | 3.59897900  | -4.71258500 | -1.02467600 | H | 0.53336500  | -0.35162900 | -2.16262000 |
| C     | 4.70841300  | -2.80985900 | -1.13418900 | H | 2.11400900  | 0.38553100  | -1.90587500 |
| H     | 5.46511500  | -3.34017400 | -0.54844700 | C | -2.28965500 | -0.64984900 | 0.14199400  |
| H     | 5.20878500  | -2.43664800 | -2.03324400 | C | -3.09879000 | -0.27193400 | -0.96432000 |
| C     | 4.66971500  | -0.56104900 | 0.23096800  | C | -4.39103700 | -0.78338500 | -1.11516000 |
| H     | 5.73840200  | -0.37483800 | 0.19121700  | H | -4.98179600 | -0.46062600 | -1.97063600 |
| C     | 3.82315700  | 0.33167700  | 0.93084200  | C | -4.94322900 | -1.69941500 | -0.22785300 |
| H     | 4.26988900  | 1.17299900  | 1.45439600  | C | -4.12691200 | -2.14295200 | 0.80274100  |
| C     | 2.45799300  | 0.15131500  | 0.99982100  | H | -4.49866200 | -2.90760300 | 1.48351700  |
| C     | 0.38999500  | -1.13614300 | 0.15670000  | C | -2.83099600 | -1.65358200 | 0.98871800  |
| C     | 0.03841100  | -2.31269900 | -0.49641500 | C | -2.64635400 | 0.65536000  | -2.07474500 |
| H     | -1.01802400 | -2.50880400 | -0.65163800 | H | -1.64122100 | 0.41595000  | -2.42624600 |
| C     | 0.94794900  | -3.25510200 | -1.04482000 | H | -2.63497400 | 1.70502400  | -1.76883600 |
| H     | 0.56366900  | -4.13821600 | -1.54781700 | H | -3.32736900 | 0.56256000  | -2.92460100 |
| C     | 4.10102300  | -1.66541600 | -0.34874800 | C | -6.35569300 | -2.19666300 | -0.39121400 |

|      |             |             |             |   |             |             |             |
|------|-------------|-------------|-------------|---|-------------|-------------|-------------|
| H    | -6.63191700 | -2.26423100 | -1.44695600 | C | -0.95452400 | 1.42892200  | -0.13529300 |
| H    | -7.06818000 | -1.51809600 | 0.09027000  | C | -1.76598500 | 2.33166200  | 0.60580200  |
| H    | -6.48423600 | -3.18366100 | 0.06044000  | C | -1.90069100 | 3.67468700  | 0.23249700  |
| C    | -2.06617200 | -2.31346700 | 2.12220200  | H | -2.53382300 | 4.32429000  | 0.83606300  |
| H    | -0.98685100 | -2.24842500 | 1.99324400  | C | -1.31059600 | 4.18498100  | -0.91834200 |
| H    | -2.33298100 | -3.37315400 | 2.16796800  | C | -0.60927000 | 3.28496300  | -1.71533900 |
| H    | -2.32087400 | -1.87448500 | 3.09306200  | H | -0.19580800 | 3.63285000  | -2.66115400 |
| B    | -0.78484100 | -0.01713900 | 0.39765200  | C | -0.42274100 | 1.94773300  | -1.34987800 |
| N    | 1.67280200  | 0.98813500  | 1.89471500  | C | -2.66283600 | 1.88005400  | 1.74517100  |
| H    | 0.34104200  | 0.64479000  | 1.78434900  | H | -2.24677800 | 2.09839300  | 2.73417000  |
| C    | -0.83380600 | 0.39148000  | 2.37558200  | H | -2.86555900 | 0.80981300  | 1.69382100  |
| H    | -0.72499100 | 1.36813300  | 2.86697200  | H | -3.61780000 | 2.40903400  | 1.67469200  |
| H    | -1.90496800 | 0.27200900  | 2.25791100  | C | -1.45081900 | 5.63472500  | -1.30580700 |
| H    | -0.49394600 | -0.38402800 | 3.06471800  | H | -0.58375300 | 6.22066000  | -0.98073100 |
| N_P8 |             |             |             | H | -2.33785500 | 6.08164300  | -0.85022300 |
| C    | 4.17503400  | -3.17825100 | -1.45224900 | H | -1.53065800 | 5.74714800  | -2.39023700 |
| H    | 4.6403600   | -3.18391100 | -2.53014500 | C | 0.31522500  | 1.09830100  | -2.36716200 |
| H    | 4.17382100  | -4.22210300 | -1.12562200 | H | 0.35279100  | 1.62212800  | -3.32604100 |
| C    | 5.24497700  | -2.33969100 | -0.69476500 | H | -0.17580200 | 0.13589500  | -2.52080200 |
| H    | 5.74708000  | -2.93156200 | 0.07679200  | H | 1.34523800  | 0.86691500  | -2.07299100 |
| H    | 6.02508100  | -1.96629000 | -1.36449300 | C | -2.00740600 | -1.15045900 | 0.21194900  |
| C    | 4.90523000  | -0.12502000 | 0.66113300  | C | -3.12303700 | -0.89384300 | 0.63009700  |
| H    | 5.95312300  | 0.03731300  | 0.89001000  | C | -4.21866900 | -1.76582900 | -0.6703470  |
| C    | 3.93526100  | 0.80864300  | 1.08771100  | H | -5.05557500 | -1.5206600  | -1.32230400 |
| H    | 4.26911500  | 1.69753900  | 1.61543300  | C | -4.27270700 | -293600900  | 0.07324900  |
| C    | 2.59427200  | 0.63519200  | 0.83049200  | C | -3.15771100 | 3.23639500  | 0.84417100  |
| C    | 0.68381300  | -0.83213200 | -0.18487200 | H | -3.13772500 | 4.17029900  | 1.40540100  |
| C    | 0.53435500  | -1.94842900 | -1.00259000 | C | -2.05311800 | 2.38489900  | 0.92113300  |
| H    | -0.48034600 | -2.23154500 | -1.26746300 | C | -3.23487200 | 0.29238600  | -1.56921300 |
| C    | 1.57341000  | -2.77482100 | -1.49482200 | H | -2.33725700 | 0.42361700  | 2.17499400  |
| H    | 1.32892500  | -3.62580000 | -2.12479500 | H | -3.40519700 | 1.23721700  | -1.04562500 |
| C    | 4.47111200  | -1.20033700 | -0.06704400 | H | -4.07374800 | 0.13771500  | -2.25291000 |
| C    | 2.05833400  | -0.49373300 | 0.12317200  | C | -5.47793300 | -3.8398210  | 0.04158900  |
| C    | 2.86225800  | -2.49517400 | -1.13541000 | H | -6.16803600 | -3.60723300 | 0.86003500  |
| C    | 3.09136000  | -1.35760900 | -0.33313200 | H | -1.8946100  | -4.88940700 | 0.14681400  |
| C    | 1.78627000  | 2.11830000  | 2.66801400  | H | -6.03110200 | -3.73020000 | -0.89497100 |
| H    | 1.67652100  | 1.21505000  | 3.26198400  | C | -0.92562700 | -2.91613400 | 1.79172100  |
| H    | 0.97357400  | 2.81467300  | 2.88088400  | H | -0.85738300 | -400173800  | 1.67247300  |
| H    | 2.74630100  | 2.59525500  | 2.86178800  | H | -1.11296000 | -2.72021900 | 2.85321900  |
| C    | 1.94446000  | 2.97331900  | 0.38166000  | H | 0.04594600  | -2.49505900 | 1.54414300  |
| H    | 2.89419900  | 3.41805200  | 0.68027300  | B | -0.70330200 | -0.12988300 | 0.44861600  |
| H    | 1.11030300  | 3.66042900  | 0.53994700  | N | 1.71092800  | 1.75782900  | 1.22185600  |
| H    | 1.97557600  | 2.67052500  | -0.66154900 | H | 0.73739800  | 1.45849300  | 1.02314200  |
|      |             |             |             | C | -0.45898500 | -0.02930100 | 2.11969600  |

|        |             |             |             |       |             |             |             |
|--------|-------------|-------------|-------------|-------|-------------|-------------|-------------|
| H      | -0.44663700 | 0.98894300  | 2.52534400  | H     | 0.96541700  | 1.64650800  | -3.42548700 |
| H      | -1.26981300 | -0.51867700 | 2.66480600  | H     | -0.15955100 | 0.44693700  | -2.77854400 |
| H      | 0.46700700  | -0.51995300 | 2.4529380   | H     | 1.53643300  | 0.34706700  | -2.37068900 |
| N10_TS |             |             |             | C     | -1.99758900 | -0.50275300 | 0.17407700  |
| C      | 4.46859600  | -2.67261000 | 0.38755900  | C     | -3.02535800 | 0.26972400  | -0.43385800 |
| H      | 5.44146400  | -3.06815200 | 0.65869000  | C     | -4.36270200 | -0.14202300 | -0.37470400 |
| C      | 4.00427700  | -1.48120000 | 0.98160100  | H     | -5.11981300 | 0.48501100  | -0.84161800 |
| H      | 4.64611000  | -0.95600200 | 1.68023900  | C     | -4.76024400 | -1.32024400 | 0.24021300  |
| C      | 2.77205400  | -0.96593400 | 0.66372700  | C     | -3.75508600 | -2.11967200 | 0.76658600  |
| C      | 0.52993000  | -1.17852300 | -0.55965400 | H     | -4.01903000 | -3.07752500 | 1.21328000  |
| C      | -0.12556400 | -1.88864500 | -1.55411900 | C     | -2.41069500 | -1.74420500 | 0.73890500  |
| H      | -1.14512700 | -1.60537200 | -1.79939300 | C     | -2.80496400 | 1.54867100  | -1.22045200 |
| C      | 0.42550000  | -2.98725900 | -2.24229000 | H     | -2.00945600 | 1.44794700  | -1.96020300 |
| H      | -0.15573500 | -3.48491800 | -3.01250100 | H     | -2.54195600 | 2.40024700  | -0.58826200 |
| C      | 3.69200100  | -3.28960300 | -0.55082900 | H     | -3.72235000 | 1.80363100  | -1.75667400 |
| C      | 1.88034400  | -1.60884100 | -0.26209800 | C     | -6.21075000 | -1.71659600 | 0.32768700  |
| C      | 1.66554800  | -3.44761900 | -1.89929900 | H     | -6.79406300 | -1.26537600 | -0.47902900 |
| C      | 2.41385700  | -2.77881000 | -0.90110200 | H     | -6.64999000 | -1.38752300 | 1.27566900  |
| C      | 2.83272300  | 0.57509400  | 2.58906500  | H     | -6.32941500 | -2.80201400 | 0.27111500  |
| H      | 2.56806600  | -0.27200800 | 3.22196200  | C     | -1.47786600 | -2.77594000 | 1.35315800  |
| H      | 2.32730000  | 1.47561800  | 2.94831400  | H     | -1.84220800 | -3.77782500 | 1.10960500  |
| H      | 3.91245500  | 0.74655100  | 2.63772400  | H     | -1.46369300 | -2.69691800 | 2.44611800  |
| C      | 2.91590100  | 1.41253200  | 0.34631300  | H     | -0.45231700 | -2.70623500 | 0.99813600  |
| H      | 4.00418900  | 1.46780300  | 0.47667200  | B     | -0.40012300 | -0.04458200 | 0.21058800  |
| H      | 2.44741700  | 2.36052000  | 0.62206800  | N     | 2.38536500  | 0.32942400  | 1.20597300  |
| H      | 2.69101700  | 1.19084800  | -0.69291100 | H     | 1.01088300  | 0.18573600  | 1.34186300  |
| C      | -0.09942100 | 1.53887400  | -0.13382800 | H     | 2.09787000  | -4.32241600 | -2.37658000 |
| C      | -0.41817900 | 2.55931000  | 0.79353200  | H     | 4.03709200  | -4.19018300 | -1.05119000 |
| C      | -0.03459600 | 3.88804100  | 0.57136700  | C     | 0.03320000  | -0.30930200 | 2.11970800  |
| H      | -0.28304600 | 4.63630800  | 1.32321500  | H     | 0.52211100  | -1.25719200 | 2.36113500  |
| C      | 0.60317400  | 4.28761400  | -0.59453300 | H     | 0.31935300  | 0.43521600  | 2.86863900  |
| C      | 0.80390800  | 3.31109100  | -1.56719300 | H     | -1.03167600 | -0.43709800 | 2.27327300  |
| H      | 1.24196400  | 3.60248200  | -2.52055500 | N10_P |             |             |             |
| C      | 0.46669900  | 1.97284500  | -1.36335600 | C     | 4.28222600  | -2.96217400 | 0.39625200  |
| C      | -1.29783500 | 2.34294600  | 2.01163100  | H     | 5.24106800  | -3.40067300 | 0.64763300  |
| H      | -0.72977000 | 2.24222600  | 2.94196300  | C     | 3.94843900  | -1.67889000 | 0.86946100  |
| H      | -1.93945200 | 1.46728600  | 1.90328600  | H     | 4.67834100  | -1.12114900 | 1.44779500  |
| H      | -1.95003200 | 3.21250200  | 2.13437700  | C     | 2.72898700  | -1.12498900 | 0.57285300  |
| C      | 0.98982300  | 5.72347500  | -0.83784200 | C     | 0.36991100  | -1.28354900 | -0.45154500 |
| H      | 1.99650600  | 5.79749900  | -1.25906700 | C     | -0.36003100 | -2.02450800 | -1.36905800 |
| H      | 0.96377200  | 6.30300400  | 0.08796300  | H     | -1.36531500 | -1.68728000 | -1.60297800 |
| H      | 0.30499600  | 6.19812400  | -1.54821700 | C     | 0.07816100  | -3.21934000 | -1.97494500 |
| C      | 0.71786600  | 1.05366500  | -2.54149500 | H     | -0.57317700 | -3.73496100 | -2.67414900 |

|   |             |             |             |        |             |             |             |
|---|-------------|-------------|-------------|--------|-------------|-------------|-------------|
| C | 3.39454000  | -3.60854300 | -0.41707400 | C      | -6.43813400 | -1.05035700 | 0.15494900  |
| C | 1.71035500  | -1.77938200 | -0.19869900 | H      | -6.89620000 | -0.61645300 | 1.05054400  |
| C | 1.29134800  | -3.74802800 | -1.63617200 | H      | -6.67379300 | -2.11814900 | 0.15262100  |
| C | 2.13452500  | -3.04296100 | -0.74470500 | H      | -6.91902300 | -0.59266900 | -0.71364000 |
| C | 2.87196000  | 0.58421200  | 2.40125700  | C      | -1.90770700 | -2.57053100 | 1.49495000  |
| H | 2.40399300  | -0.17057400 | 3.02712400  | H      | -2.36372500 | -3.54017600 | 1.27338700  |
| H | 2.46769300  | 1.57239000  | 2.62757200  | H      | -1.93311900 | -2.44380800 | 2.58288200  |
| H | 3.95306100  | 0.58638700  | 2.53627600  | H      | -0.86415900 | -2.62115000 | 1.19361000  |
| C | 3.36554300  | 1.19769100  | 0.09169600  | B      | -0.46280900 | -0.06965400 | 0.37555900  |
| H | 4.42086000  | 1.02653100  | 0.30592100  | N      | 2.56146700  | 0.29228200  | 0.97017700  |
| H | 3.07128200  | 2.22712900  | 0.30428300  | H      | 1.56673700  | 0.54728400  | 0.80932100  |
| H | 3.14530900  | 0.95906900  | -0.94581700 | H      | 1.63346400  | -4.69691000 | -2.03864400 |
| C | 0.03655500  | 1.47711300  | -0.06581900 | H      | 3.64119600  | -4.57858000 | -0.83937000 |
| C | -0.18502200 | 2.56565200  | 0.82278900  | C      | -0.11786600 | -0.28881400 | 2.01423800  |
| C | 0.33628300  | 3.83919800  | 0.56650900  | H      | 0.48174700  | -1.18681100 | 2.22118300  |
| H | 0.13874700  | 4.63836500  | 1.28022300  | H      | 0.39293700  | 0.55412000  | 2.49008200  |
| C | 1.03541000  | 4.13183000  | -0.59944000 | H      | -1.03723300 | -0.40459400 | 2.59349000  |
| C | 1.15486200  | 3.10692300  | -1.53343500 |        |             |             |             |
| H | 1.62941800  | 3.32065000  | -2.49014100 | N11_TS |             |             |             |
| C | 0.67910600  | 1.81399000  | -1.29069300 | B      | 0.20083100  | -0.25431200 | -0.07694100 |
| C | -1.12553300 | 2.47393900  | 2.01181900  | N      | -1.94399600 | -2.26088800 | 0.04569000  |
| H | -0.60361000 | 2.35888200  | 2.96737600  | C      | -0.85071000 | -2.42997400 | 1.01921300  |
| H | -1.82302800 | 1.64225800  | 1.90653500  | H      | -0.11010000 | -3.06367000 | 0.51221900  |
| H | -1.70766500 | 3.39815200  | 2.07313600  | C      | -0.19095600 | -1.07802600 | 1.28475000  |
| C | 1.60503200  | 5.50299800  | -0.85792400 | H      | -0.94331100 | -0.47519000 | 1.81514700  |
| H | 2.64645100  | 5.57202400  | -0.52412500 | C      | 0.83095000  | -1.45885900 | 2.36473600  |
| H | 1.03988700  | 6.27231000  | -0.32592400 | H      | 1.71222400  | -1.92731400 | 1.92131000  |
| H | 1.58795300  | 5.74268400  | -1.92419600 | H      | 1.16790700  | -0.58876800 | 2.93152300  |
| C | 0.83166200  | 0.84028300  | -2.44336100 | C      | 0.08159900  | -2.49438500 | 3.25120200  |
| H | 1.10795500  | 1.38290500  | -3.35129100 | H      | 0.74119900  | -3.31579000 | 3.54063400  |
| H | -0.09809300 | 0.30129100  | -2.63681700 | H      | -0.27250300 | -2.03338000 | 4.17651800  |
| H | 1.58978200  | 0.06914500  | -2.26962900 | C      | -1.12410500 | -3.00633800 | 2.41315100  |
| C | -2.10601700 | -0.32093800 | 0.19451100  | H      | -2.05882900 | -2.59819000 | 2.81056300  |
| C | -3.01066200 | 0.53354800  | -0.49172200 | H      | -1.21255600 | -4.09608700 | 2.41724600  |
| C | -4.38860900 | 0.28055800  | -0.49311100 | C      | -2.31831200 | -3.52792800 | -0.60866900 |
| H | -5.04406300 | 0.96921100  | -1.02366600 | H      | -2.74775700 | -4.20937100 | 0.14350800  |
| C | -4.94924700 | -0.81930700 | 0.14003000  | H      | -1.39855900 | -3.98796900 | -0.98478400 |
| C | -4.06965300 | -1.69881500 | 0.75715000  | C      | -3.31620900 | -3.31334800 | -1.74261100 |
| H | -4.46414900 | -2.59929200 | 1.22720800  | H      | -3.58924100 | -4.28773500 | -2.15927300 |
| C | -2.69177000 | -1.47350700 | 0.79255500  | H      | -2.83484700 | -2.74557500 | -2.54787000 |
| C | -2.60102400 | 1.75417700  | -1.29453800 | C      | -4.54973800 | -2.55749300 | -1.25369300 |
| H | -1.78838800 | 1.53883200  | -1.98959700 | H      | -5.22881200 | -2.35188100 | -2.08591400 |
| H | -2.26859200 | 2.58555400  | -0.66685300 | H      | -5.09858100 | -3.18168200 | -0.53571200 |
| H | -3.45255000 | 2.10546800  | -1.88306300 | C      | -4.11935400 | -1.26060900 | -0.57195200 |

|       |             |             |             |   |             |             |             |
|-------|-------------|-------------|-------------|---|-------------|-------------|-------------|
| H     | -3.64836800 | -0.59083600 | -1.29971600 | H | 0.25448400  | -4.01717700 | 3.04725100  |
| H     | -4.98252600 | -0.73309400 | -0.15486300 | H | -0.42550100 | -2.44726000 | 3.47107100  |
| C     | -3.13222500 | -1.54875400 | 0.55438400  | C | -1.38750200 | -3.34472700 | 1.73598500  |
| H     | -2.80216200 | -0.61671800 | 1.01985400  | H | -2.31238000 | -3.09885200 | 2.26588100  |
| H     | -3.62559300 | -2.15930300 | 1.32666700  | H | -1.46474300 | -4.39349900 | 1.43627600  |
| C     | -0.63983800 | 1.13952800  | -0.10445900 | C | -3.23223200 | -2.81896000 | -0.78445600 |
| F     | 0.56568800  | 1.69592600  | 1.83988200  | H | -3.59587100 | -3.49636900 | -0.00438400 |
| C     | -0.39413600 | 2.01263900  | 0.95645600  | H | -2.57288200 | -3.37734900 | -1.45314500 |
| F     | -0.77095900 | 3.99574500  | 2.18843700  | C | -4.37828800 | -2.15798500 | -1.53582700 |
| C     | -1.06588800 | 3.20505100  | 1.15841600  | H | -4.96446800 | -2.93988600 | -2.02633400 |
| F     | -2.73227700 | 4.71185300  | 0.43750300  | H | -3.96440100 | -1.51778500 | -2.32528200 |
| C     | -2.06481300 | 3.57476100  | 0.26469900  | C | -5.23513200 | -1.32196600 | -0.58737200 |
| F     | -3.31556600 | 3.07575700  | -1.66642400 | H | -6.04118600 | -0.82777800 | -1.13487600 |
| C     | -2.35666100 | 2.74340100  | -0.80228200 | H | -5.70237800 | -1.97664300 | 0.15980500  |
| F     | -2.00263900 | 0.82037500  | -2.03837100 | C | -4.35166400 | -0.28476100 | 0.10278900  |
| C     | -1.64125300 | 1.55898800  | -0.96923400 | H | -3.97962700 | 0.42422400  | -0.64326300 |
| C     | 1.80358800  | -0.12496500 | -0.32402800 | H | -4.91759000 | 0.29645900  | 0.83635300  |
| F     | 1.87769300  | 2.25062200  | -0.50370000 | C | -3.18542600 | -0.94163300 | 0.83568900  |
| C     | 2.50475500  | 1.06823500  | -0.48897900 | H | -2.50482400 | -0.20311100 | 1.26219900  |
| F     | 4.49337600  | 2.30582500  | -0.80475200 | H | -3.55385100 | -1.59493300 | 1.63047900  |
| C     | 3.88521200  | 1.13045100  | -0.65726900 | C | -0.45295500 | 0.87093800  | -0.26193300 |
| F     | 5.94758000  | 0.00536500  | -0.84805900 | F | 0.71235100  | 1.35828000  | 1.73440500  |
| C     | 4.62958400  | -0.03726200 | -0.68262300 | C | -0.26244800 | 1.67209700  | 0.86912100  |
| F     | 4.67441000  | -2.39082500 | -0.56883200 | F | -0.77533800 | 3.50349900  | 2.27887000  |
| C     | 3.97936300  | -1.25450400 | -0.53872100 | C | -1.02405100 | 2.78540400  | 1.18456600  |
| F     | 2.04090700  | -2.48720600 | -0.24664900 | F | -2.84372200 | 4.19580600  | 0.64487400  |
| C     | 2.60381000  | -1.26653500 | -0.36746800 | C | -2.07915500 | 3.14607700  | 0.35193300  |
| H     | -1.07247700 | -1.42837700 | -0.81095600 | F | -3.39244100 | 2.64083000  | -1.54264500 |
| C     | -0.21797800 | -1.18219900 | -1.75926900 | C | -2.33336400 | 2.37788100  | -0.76843600 |
| H     | -1.09360300 | -1.38809000 | -2.38795600 | F | -1.95205000 | 0.51644300  | -2.08872200 |
| H     | 0.20932800  | -0.30072600 | -2.23236600 | C | -1.52901400 | 1.27198900  | -1.03833600 |
| H     | 0.46896600  | -2.02465900 | -1.82672300 | C | 2.08744200  | -0.18324500 | -0.38315200 |
| N11_P |             |             |             | F | 1.97113900  | 2.20477600  | -0.39662000 |
| B     | 0.46264100  | -0.51279800 | -0.43708300 | C | 2.69516400  | 1.07266200  | -0.37058500 |
| N     | -2.37632800 | -1.80000600 | -0.09412500 | F | 4.56755700  | 2.51734200  | -0.32561800 |
| C     | -1.13637300 | -2.44240100 | 0.50857400  | C | 4.07129300  | 1.27886300  | -0.35249200 |
| H     | -0.75169600 | -3.04998600 | -0.31816900 | F | 6.25182900  | 0.37128700  | -0.36049200 |
| C     | -0.05314900 | -1.43206900 | 0.87667800  | C | 4.93136800  | 0.19464000  | -0.37774200 |
| H     | -0.48712400 | -0.75137100 | 1.62583500  | F | 5.19142200  | -2.14420400 | -0.49222900 |
| C     | 0.84920000  | -2.34995500 | 1.72008000  | C | 4.38872800  | -1.07862800 | -0.43607300 |
| H     | 1.38067800  | -3.06736300 | 1.09208200  | F | 2.58981800  | -2.50876100 | -0.57175200 |
| H     | 1.59585000  | -1.77953900 | 2.27842800  | C | 3.00879800  | -1.23061200 | -0.45251800 |
| C     | -0.14606900 | -3.09031600 | 2.63067500  | H | -2.00642300 | -1.17249900 | -0.82529900 |
|       |             |             |             | C | 0.22954000  | -1.24043200 | -1.89906200 |

|        |             |             |             |       |             |             |             |
|--------|-------------|-------------|-------------|-------|-------------|-------------|-------------|
| H      | -0.77625800 | -1.61092300 | -2.15147700 | C     | 0.74351100  | 4.00091200  | 0.33346600  |
| H      | 0.48260800  | -0.54664000 | -2.70793000 | F     | 0.99137100  | 5.29700800  | 0.49552500  |
| H      | 0.89533100  | -2.10252500 | -2.00047300 | C     | 1.52261200  | 3.23803300  | -0.52099300 |
|        |             |             |             | F     | 2.52933700  | 3.79891200  | -1.19060900 |
| N12_TS |             |             |             | C     | 1.24465600  | 1.88443900  | -0.67152600 |
| N      | 2.60190100  | -1.41477500 | -0.25568000 | F     | 2.04778000  | 1.22679600  | -1.53558100 |
| H      | 1.37398000  | -0.97187000 | -0.99620800 | C     | -1.70926700 | -0.65906500 | -0.32018600 |
| B      | -0.11531500 | -0.37569500 | -0.10686700 | C     | -2.48383000 | 0.19222000  | -1.11371400 |
| C      | 2.09680700  | -1.10025400 | 1.10878500  | F     | -1.90833900 | 1.23250800  | -1.74157000 |
| H      | 2.34501300  | -0.04001200 | 1.26807100  | C     | -3.84346400 | 0.03735000  | -1.33642100 |
| C      | 0.56943100  | -1.22395600 | 1.10097200  | F     | -4.50885900 | 0.89484600  | -2.10777800 |
| H      | 0.32770300  | -2.28754700 | 0.97804600  | C     | -4.50847700 | -1.02922200 | -0.74860000 |
| C      | 3.88748200  | -0.74922100 | -0.54124900 | F     | -5.81129500 | -1.20153900 | -0.94485700 |
| H      | 4.66370100  | -1.16033700 | 0.12483700  | C     | -3.79157600 | -1.91405400 | 0.03828300  |
| H      | 3.77506800  | 0.31220600  | -0.31501000 | F     | -4.40700800 | -2.95310700 | 0.60116000  |
| C      | 4.30807100  | -0.94590900 | -1.99259300 | C     | -2.42692800 | -1.71940800 | 0.23174400  |
| H      | 3.57423000  | -0.45853800 | -2.64536600 | F     | -1.83773800 | -2.64500200 | 1.00641900  |
| H      | 5.26500700  | -0.44105400 | -2.15593600 | C     | 0.43140000  | -0.93389200 | -1.89058000 |
| C      | 4.41396300  | -2.43346900 | -2.32656300 | H     | 1.30568900  | -0.86994400 | -2.55012800 |
| H      | 5.23222200  | -2.87554900 | -1.74239400 | H     | -0.21313200 | -0.14311600 | -2.26941600 |
| H      | 4.65975600  | -2.57926600 | -3.38234300 | H     | -0.03242400 | -1.91198700 | -2.02311900 |
| C      | 3.10684700  | -3.14358000 | -1.97547200 |       |             |             |             |
| H      | 2.31112400  | -2.81598300 | -2.65286500 | N12_P |             |             |             |
| H      | 3.20608800  | -4.22594200 | -2.10367700 | N     | 2.75233900  | -1.42253600 | -0.21075500 |
| C      | 2.70909900  | -2.86481400 | -0.52692400 | H     | 2.20621300  | -0.89742500 | -0.90663800 |
| H      | 1.74746300  | -3.33057100 | -0.29108600 | B     | -0.16812700 | -0.37757700 | -0.33785100 |
| H      | 3.46642300  | -3.30616800 | 0.13771500  | C     | 2.04063200  | -1.10647900 | 1.09925600  |
| C      | 2.74650700  | -1.90743700 | 2.23726000  | H     | 2.30113900  | -0.05391600 | 1.28171700  |
| H      | 2.51598200  | -2.97238800 | 2.10761000  | C     | 0.52042800  | -1.21361600 | 0.93425800  |
| H      | 3.83832000  | -1.80417600 | 2.21077100  | H     | 0.28638600  | -2.28109400 | 0.82470800  |
| C      | 2.19450800  | -1.45848400 | 3.59168200  | C     | 4.15239400  | -0.89697100 | -0.27733100 |
| H      | 2.65365100  | -2.04351400 | 4.39480100  | H     | 4.75190400  | -1.47807700 | 0.42927600  |
| H      | 2.46670100  | -0.40886400 | 3.76721100  | H     | 4.11570400  | 0.14301800  | 0.04910100  |
| C      | 0.67201800  | -1.59536200 | 3.61899900  | C     | 4.69215500  | -1.02326700 | -1.69540200 |
| H      | 0.27853300  | -1.25703000 | 4.58316200  | H     | 4.09371800  | -0.38511000 | -2.35700600 |
| H      | 0.39974000  | -2.65464400 | 3.51678100  | H     | 5.71341100  | -0.63322400 | -1.71314300 |
| C      | 0.03284900  | -0.79849400 | 2.48110500  | C     | 4.64650700  | -2.47530700 | -2.17076700 |
| H      | 0.24989000  | 0.26716200  | 2.63811100  | H     | 5.33014300  | -3.07995100 | -1.56088000 |
| H      | -1.05511200 | -0.90037200 | 2.51270500  | H     | 4.98994500  | -2.54803200 | -3.20573200 |
| C      | 0.22334200  | 1.21828300  | -0.00371000 | C     | 3.22700700  | -3.02741200 | -2.04301300 |
| C      | -0.53518300 | 2.03609000  | 0.83450200  | H     | 2.55427900  | -2.51208200 | -2.73847000 |
| F      | -1.56990500 | 1.52199300  | 1.51620200  | H     | 3.19393100  | -4.09064300 | -2.29648900 |
| C      | -0.29901700 | 3.39161100  | 1.01764500  | C     | 2.69525700  | -2.86198100 | -0.62412400 |
| F      | -1.06140200 | 4.10842000  | 1.84068300  | H     | 1.65533500  | -3.17969800 | -0.53781200 |



|        |             |             |             |   |             |             |             |
|--------|-------------|-------------|-------------|---|-------------|-------------|-------------|
| H      | 3.30320800  | -3.42322600 | 0.09121800  | C | 1.97691600  | -0.56721000 | 0.40193000  |
| C      | 2.58640200  | -1.96432200 | 2.24131700  | H | 1.88530200  | 0.45389000  | 0.79048500  |
| H      | 2.33131800  | -3.01580300 | 2.05793700  | C | 0.59737800  | -1.21418500 | 0.47240400  |
| H      | 3.67876400  | -1.89358100 | 2.31367700  | H | 0.28503700  | -1.27990600 | 1.52036000  |
| C      | 1.94484100  | -1.53644200 | 3.56463700  | H | 0.62879800  | -2.24425400 | 0.10443800  |
| H      | 2.31915200  | -2.17190700 | 4.37303800  | C | 2.82449700  | -1.60947800 | -1.68571600 |
| H      | 2.25264100  | -0.50846400 | 3.79781900  | H | 2.13089700  | -2.43163200 | -1.48237700 |
| C      | 0.42161600  | -1.59883200 | 3.46777000  | H | 3.78544900  | -1.86540500 | -1.21611400 |
| H      | -0.02686600 | -1.24670100 | 4.40246800  | C | 3.02735100  | -1.43736100 | -3.18942600 |
| H      | 0.10357900  | -2.64138200 | 3.33283600  | H | 2.06044100  | -1.30948500 | -3.68833100 |
| C      | -0.07609400 | -0.76671500 | 2.28695100  | H | 3.46586000  | -2.35919600 | -3.58375500 |
| H      | 0.18883700  | 0.28682200  | 2.46033500  | C | 3.92602100  | -0.23751400 | -3.48381100 |
| H      | -1.16565800 | -0.79885800 | 2.23406200  | H | 4.93416600  | -0.43802000 | -3.09759400 |
| C      | 0.21013900  | 1.22846900  | -0.10942500 | H | 4.02004700  | -0.08038000 | -4.56213800 |
| C      | -0.58091400 | 2.10985000  | 0.63086500  | C | 3.36610400  | 1.00811600  | -2.79946100 |
| F      | -1.71515100 | 1.68452600  | 1.20526900  | H | 4.03535600  | 1.86322200  | -2.93444900 |
| C      | -0.27720300 | 3.44890500  | 0.84183600  | H | 2.40115300  | 1.28460300  | -3.23985700 |
| F      | -1.09354200 | 4.22695400  | 1.55165600  | C | 3.18134100  | 0.76123200  | -1.30625400 |
| C      | 0.89106100  | 3.98096500  | 0.31472100  | H | 4.16108300  | 0.56349400  | -0.84166000 |
| F      | 1.20602500  | 5.25959800  | 0.51045000  | H | 2.74663400  | 1.63949300  | -0.82023100 |
| C      | 1.73357900  | 3.15022300  | -0.40331200 | C | 3.08675800  | -1.23942800 | 1.19085700  |
| F      | 2.88054100  | 3.61966400  | -0.90193700 | C | 4.11319700  | -0.45844600 | 1.73031100  |
| C      | 1.37259800  | 1.82122500  | -0.58679100 | H | 4.07974400  | 0.62158400  | 1.60652800  |
| F      | 2.29776800  | 1.08617400  | -1.27465400 | C | 5.16119200  | -1.03861300 | 2.43920700  |
| C      | -1.81353200 | -0.61093900 | -0.34512400 | H | 5.94486600  | -0.41285400 | 2.85414500  |
| C      | -2.62959400 | 0.25116700  | -1.08064700 | C | 5.19352800  | -2.41740700 | 2.62500700  |
| F      | -2.08986100 | 1.32254900  | -1.68934800 | H | 6.00544500  | -2.87504800 | 3.18093200  |
| C      | -3.99614100 | 0.09259400  | -1.25163100 | C | 4.17080500  | -3.20605000 | 2.10477400  |
| F      | -4.70295300 | 0.97194200  | -1.96434200 | H | 4.18228000  | -4.28057900 | 2.25724900  |
| C      | -4.62917100 | -1.00299600 | -0.68180800 | C | 3.12572800  | -2.62136800 | 1.39538700  |
| F      | -5.94044200 | -1.18343600 | -0.83434100 | H | 2.32782800  | -3.24782200 | 1.00804200  |
| C      | -3.87142300 | -1.90545900 | 0.04216800  | C | -2.01140900 | -0.92747300 | -0.31579100 |
| F      | -4.45237000 | -2.97544700 | 0.59150600  | C | -3.07987900 | -0.16795100 | -0.79676400 |
| C      | -2.50170300 | -1.69819900 | 0.18496300  | F | -2.84792900 | 1.02865500  | -1.36500200 |
| F      | -1.87008500 | -2.65427400 | 0.90098200  | C | -4.40582600 | -0.57244400 | -0.75198900 |
| C      | 0.22543000  | -0.88474300 | -1.87019300 | F | -5.37494100 | 0.20390300  | -1.23337200 |
| H      | 1.21627100  | -0.66205000 | -2.29002500 | C | -4.71743500 | -1.80265600 | -0.19081200 |
| H      | -0.45940000 | -0.39963300 | -2.57352200 | F | -5.98013500 | -2.21216500 | -0.12914100 |
| H      | 0.05532200  | -1.96588800 | -1.97615300 | C | -3.69647900 | -2.59989400 | 0.29957300  |
|        |             |             |             | F | -3.98110500 | -3.78380900 | 0.83962900  |
| N13_TS |             |             |             | C | -2.37992000 | -2.15546400 | 0.22915800  |
| N      | 2.28684500  | -0.38420100 | -1.05352100 | F | -1.46614600 | -2.99866400 | 0.73068700  |
| H      | 0.85879600  | -0.26911200 | -1.53257200 | C | -0.46166700 | 1.21559400  | 0.12315300  |
| B      | -0.49445300 | -0.34270200 | -0.34826700 | C | 0.04304500  | 2.30653800  | -0.57270900 |

|       |             |             |             |        |             |             |             |
|-------|-------------|-------------|-------------|--------|-------------|-------------|-------------|
| F     | 0.56143700  | 2.15570200  | -1.80974500 | H      | -5.18113200 | -4.63744000 | -2.32166100 |
| C     | 0.07293800  | 3.59935300  | -0.06202900 | C      | -3.66599000 | -4.24882700 | -0.84272800 |
| F     | 0.57861700  | 4.60071900  | -0.78115400 | H      | -3.73041700 | -5.23812600 | -0.40152100 |
| C     | -0.42761300 | 3.84082200  | 1.20780200  | C      | -2.75847700 | -3.32484300 | -0.33416600 |
| F     | -0.40751500 | 5.06871100  | 1.71733200  | H      | -2.11327800 | -3.60681400 | 0.49193900  |
| C     | -0.94180800 | 2.78434900  | 1.94709300  | C      | 2.25918600  | -0.65756600 | 0.47585800  |
| F     | -1.41887900 | 3.00156600  | 3.17046500  | C      | 3.23914300  | 0.33214100  | 0.45558000  |
| C     | -0.94429200 | 1.51011200  | 1.39724200  | F      | 2.90190100  | 1.62475900  | 0.61627400  |
| F     | -1.43764700 | 0.52442100  | 2.16211400  | C      | 4.59545000  | 0.08118400  | 0.28956100  |
| C     | -0.21166000 | -0.41431400 | -2.24981800 | F      | 5.47726400  | 1.08295500  | 0.27165800  |
| H     | -1.09476700 | 0.20672600  | -2.38008900 | C      | 5.03325800  | -1.22726200 | 0.15162300  |
| H     | -0.41660300 | -1.45787000 | -2.49085800 | F      | 6.32965000  | -1.49459000 | -0.00500800 |
| H     | 0.47184900  | -0.01303800 | -3.00840800 | C      | 4.10375600  | -2.25444600 | 0.19135200  |
| N13_P |             |             |             | F      | 4.50798200  | -3.52179800 | 0.07531200  |
| N     | -2.33999500 | -0.18829100 | 0.76901000  | C      | 2.75794400  | -1.95140800 | 0.35943600  |
| H     | -1.55996300 | 0.34706000  | 1.17457700  | F      | 1.92926100  | -3.01214100 | 0.42391800  |
| B     | 0.67334300  | -0.32378100 | 0.75698800  | C      | 0.31101100  | 1.13045900  | 0.02241500  |
| C     | -1.68643300 | -1.01189300 | -0.36028600 | C      | -0.28268400 | 2.23107400  | 0.62674600  |
| H     | -1.54248200 | -0.26052700 | -1.14311400 | F      | -0.68746400 | 2.16376100  | 1.92213600  |
| C     | -0.31102000 | -1.49308800 | 0.08281800  | C      | -0.59817100 | 3.41937400  | -0.02418200 |
| H     | 0.14069700  | -1.91105800 | -0.82301500 | F      | -1.20971300 | 4.40993400  | 0.63010300  |
| H     | -0.40289000 | -2.33758000 | 0.77644300  | C      | -0.29105600 | 3.55186700  | -1.36851400 |
| C     | -2.89695700 | -1.00358100 | 1.89477000  | F      | -0.57952900 | 4.67546200  | -2.02126700 |
| H     | -2.10585500 | -1.68789300 | 2.20950500  | C      | 0.29907300  | 2.48262600  | -2.03282800 |
| H     | -3.73060400 | -1.58143600 | 1.48684300  | F      | 0.57443000  | 2.58814300  | -3.33201200 |
| C     | -3.34998800 | -0.08875400 | 3.02679100  | C      | 0.57590200  | 1.31436100  | -1.33511000 |
| H     | -2.48230100 | 0.44661500  | 3.43160000  | F      | 1.10130400  | 0.30642600  | -2.04776400 |
| H     | -3.74735900 | -0.71313800 | 3.83168300  | C      | 0.52563600  | -0.29236600 | 2.39114100  |
| C     | -4.39363000 | 0.91477200  | 2.53671800  | H      | 1.14552000  | 0.49035600  | 2.84149600  |
| H     | -5.29696200 | 0.37819200  | 2.21889400  | H      | 0.88362000  | -1.25264200 | 2.78350200  |
| H     | -4.68566200 | 1.58546100  | 3.34850400  | H      | -0.48068700 | -0.15300200 | 2.81016700  |
| C     | -3.83430600 | 1.71815900  | 1.36178800  | N15_TS |             |             |             |
| H     | -4.59451800 | 2.38090300  | 0.93895400  | N      | 2.28071000  | -0.21996200 | -1.29707600 |
| H     | -3.00377000 | 2.35131500  | 1.69332000  | B      | -0.44059200 | -0.35013300 | -0.42067100 |
| C     | -3.34522000 | 0.79448800  | 0.25378000  | C      | 2.08284500  | -0.49352200 | 0.16310600  |
| H     | -4.16156700 | 0.20344300  | -0.17374900 | H      | 1.98162200  | 0.50055800  | 0.61407900  |
| H     | -2.85125900 | 1.35213200  | -0.54701600 | C      | 0.73526300  | -1.20015100 | 0.29726700  |
| C     | -2.66006700 | -2.04508900 | -0.88938400 | H      | 0.50209000  | -1.32385200 | 1.35985500  |
| C     | -3.47225600 | -1.72542800 | -1.98144200 | H      | 0.78025900  | -2.21274900 | -0.11778800 |
| H     | -3.37863300 | -0.74633200 | -2.44594300 | C      | 2.76205300  | -1.38212000 | -2.08123800 |
| C     | -4.37772100 | -2.64922700 | -2.49620700 | C      | 4.27498500  | -1.58346400 | -2.18005100 |
| H     | -4.99271600 | -2.38509900 | -3.35013400 | H      | 4.76563300  | -0.75351500 | -2.69442700 |
| C     | -4.47976800 | -3.91233500 | -1.92210300 | H      | 4.46489300  | -2.48755200 | -2.76476200 |

|   |             |             |             |       |             |             |             |
|---|-------------|-------------|-------------|-------|-------------|-------------|-------------|
| C | 2.98050300  | 1.43022100  | -3.04270700 | C     | -0.26267300 | -0.40804500 | -2.34384000 |
| H | 3.50409600  | 2.38132000  | -3.16481900 | H     | -1.15104000 | 0.20674300  | -2.46271900 |
| H | 1.95062800  | 1.57500300  | -3.37342700 | H     | 0.39416200  | -0.06207700 | -3.15530900 |
| C | 3.02961200  | 1.01768200  | -1.57659300 | H     | -0.47117500 | -1.46227100 | -2.52525400 |
| C | 3.26696900  | -1.16552500 | 0.83137400  |       |             |             |             |
| C | 4.34471900  | -0.38333200 | 1.25906700  | N15_P |             |             |             |
| H | 4.28466300  | 0.69898200  | 1.17013200  | N     | -2.36255000 | 0.08536100  | 1.01778900  |
| C | 5.48509800  | -0.96925500 | 1.79927800  | B     | 0.59867600  | -0.36478300 | 0.79093800  |
| H | 6.31274700  | -0.34603700 | 2.12259600  | C     | -1.88804900 | -0.78147500 | -0.17609300 |
| C | 5.55803300  | -2.35365200 | 1.93272800  | H     | -1.73061900 | -0.03731800 | -0.96247300 |
| H | 6.44506600  | -2.81467800 | 2.35480700  | C     | -0.53903300 | -1.40464100 | 0.15538500  |
| C | 4.47855800  | -3.14081300 | 1.54086000  | H     | -0.19875400 | -1.83458800 | -0.79083000 |
| H | 4.52018400  | -4.21864300 | 1.66171900  | H     | -0.65886500 | -2.25623400 | 0.83689300  |
| C | 3.33990500  | -2.55015900 | 0.99908400  | C     | -2.95645500 | -0.69957100 | 2.16205000  |
| H | 2.50146100  | -3.17532800 | 0.70812300  | C     | -4.46105700 | -0.92054600 | 2.09563300  |
| C | -1.93171700 | -0.98448500 | -0.31991700 | H     | -5.01659500 | 0.01416800  | 2.19863100  |
| C | -3.04381700 | -0.26501100 | -0.76134400 | H     | -4.73554200 | -1.55648300 | 2.94059500  |
| F | -2.87792400 | 0.94028400  | -1.33403900 | C     | -3.33599600 | 2.28771600  | 1.71833200  |
| C | -4.35068800 | -0.72098100 | -0.67181400 | H     | -3.88295600 | 3.14984800  | 1.33072900  |
| F | -5.36417400 | 0.01691700  | -1.12075600 | H     | -2.36204600 | 2.63813300  | 2.06757200  |
| C | -4.59473800 | -1.96239700 | -0.10144400 | C     | -3.17935600 | 1.26854200  | 0.60138200  |
| F | -5.83757100 | -2.42207700 | 0.00024300  | C     | -2.99754500 | -1.70448100 | -0.63314300 |
| C | -3.52777600 | -2.71876600 | 0.35568000  | C     | -3.96387500 | -1.22499600 | -1.52314000 |
| F | -3.74882300 | -3.91188100 | 0.90529300  | H     | -3.86668400 | -0.21984800 | -1.92697800 |
| C | -2.23255200 | -2.22446500 | 0.23880300  | C     | -5.03817600 | -2.02063900 | -1.90975700 |
| F | -1.26723900 | -3.02920600 | 0.70515700  | H     | -5.77834100 | -1.63169400 | -2.60129200 |
| C | -0.44329800 | 1.19613400  | 0.08770300  | C     | -5.15180100 | -3.31817200 | -1.41772200 |
| C | -0.10767700 | 2.33651700  | -0.62996700 | H     | -5.98793000 | -3.94227600 | -1.71544800 |
| F | 0.26327200  | 2.24814200  | -1.92284600 | C     | -4.17457200 | -3.81971300 | -0.56141200 |
| C | -0.11197600 | 3.61713700  | -0.08892000 | H     | -4.24422200 | -4.83870300 | -0.19496900 |
| F | 0.23350200  | 4.66796800  | -0.83210700 | C     | -3.10131500 | -3.02112300 | -0.17684200 |
| C | -0.47727400 | 3.79424800  | 1.23653700  | H     | -2.33951800 | -3.42960100 | 0.47886000  |
| F | -0.48652300 | 5.00960300  | 1.77528000  | C     | 2.12916800  | -0.84846700 | 0.43564200  |
| C | -0.82573900 | 2.68706200  | 1.99822000  | C     | 3.19543700  | 0.03466100  | 0.60119600  |
| F | -1.17598100 | 2.84203900  | 3.27298700  | F     | 2.96834700  | 1.29160100  | 1.02377800  |
| C | -0.80035600 | 1.42785300  | 1.41524700  | C     | 4.52453200  | -0.29592400 | 0.37390600  |
| F | -1.14344700 | 0.39454700  | 2.19951900  | F     | 5.49426200  | 0.60480700  | 0.54693200  |
| H | 4.74423100  | -1.70820900 | -1.20331600 | C     | 4.84276400  | -1.58447300 | -0.02870600 |
| H | 3.46246500  | 0.70106200  | -3.69854900 | F     | 6.11054600  | -1.93111800 | -0.24786400 |
| H | 2.34910200  | -1.28185400 | -3.09258900 | C     | 3.82481000  | -2.51132000 | -0.18413800 |
| H | 2.29975300  | -2.27427000 | -1.64867100 | F     | 4.11593900  | -3.76077600 | -0.55391500 |
| H | 2.57726100  | 1.80645300  | -0.96740700 | C     | 2.50861600  | -2.13195600 | 0.05632800  |
| H | 4.07311700  | 0.90996500  | -1.24830500 | F     | 159451300   | -3.11130000 | -0.08612400 |
| H | 0.82136600  | -0.17993700 | -1.67239600 | C     | 0.37452500  | 1.12765900  | 0.08077000  |

|        |             |             |             |   |             |             |             |
|--------|-------------|-------------|-------------|---|-------------|-------------|-------------|
| C      | 0.04794300  | 2.31093500  | 0.73192700  | C | -3.27464800 | -1.33406900 | -0.81473400 |
| F      | -0.15271100 | 2.32358700  | 2.07014000  | C | -3.86266900 | -0.76473100 | -1.94971000 |
| C      | -0.17868700 | 3.52524300  | 0.09190500  | H | -3.43051800 | 0.14102900  | -2.36888000 |
| F      | -0.53631300 | 4.60462700  | 0.79123500  | C | -4.97760700 | -1.33539400 | -2.55758500 |
| C      | -0.04743300 | 3.59842600  | -1.28602800 | H | -5.40830200 | -0.87119200 | -3.43892400 |
| F      | -0.26034600 | 4.74588800  | -1.92621100 | C | -5.53350100 | -2.49809100 | -2.03560100 |
| C      | 0.28683400  | 2.44953900  | -1.99312300 | H | -6.40188600 | -2.94915100 | -2.50451400 |
| F      | 0.39862200  | 2.50097500  | -3.31981300 | C | -4.96460800 | -3.08027300 | -0.90646000 |
| C      | 0.48528700  | 1.26017200  | -1.30316100 | H | -5.38879600 | -3.98861800 | -0.49059500 |
| F      | 0.75548600  | 0.17774700  | -2.05016700 | C | -3.84847200 | -2.50757800 | -0.30452100 |
| H      | -4.77752800 | -1.42235500 | 1.18093700  | H | -3.43042200 | -2.98441100 | 0.57442400  |
| H      | -3.89558000 | 1.89338800  | 2.56970400  | C | 2.04678100  | -0.95368000 | 0.42115700  |
| H      | -2.69474600 | -0.15427400 | 3.07204400  | C | 2.99689500  | -0.05840200 | 0.93660300  |
| H      | -2.41165400 | -1.64558700 | 2.18481000  | F | 2.61957600  | 1.14107900  | 1.41691500  |
| H      | -2.64285400 | 1.71579900  | -0.24047500 | C | 4.35999900  | -0.30099300 | 1.01558600  |
| H      | -4.13751300 | 0.88984000  | 0.23951700  | F | 5.17866900  | 0.61129400  | 1.53589400  |
| H      | -1.47645300 | 0.45763900  | 1.38657700  | C | 4.86623000  | -1.50083600 | 0.54111300  |
| C      | 0.52456000  | -0.33229100 | 2.43323400  | F | 6.16735300  | -1.76115500 | 0.60467300  |
| H      | 1.29540200  | 0.32173500  | 2.85252600  | C | 3.98480800  | -2.42038100 | 0.00285600  |
| H      | -0.41459100 | -0.01215500 | 2.91054000  | F | 4.44071700  | -3.57908600 | -0.46965000 |
| H      | 0.72019500  | -1.34602700 | 2.80484700  | C | 2.62246900  | -2.13456600 | -0.05075200 |
| N16_TS |             |             |             | F | 1.89514100  | -3.11176500 | -0.61450600 |
| N      | -2.28665700 | 0.05087400  | 1.08497900  | C | 0.49101100  | 1.02905100  | -0.30959300 |
| H      | -0.86151900 | -0.02163700 | 1.54818600  | C | 0.12512700  | 2.22412100  | 0.30051700  |
| B      | 0.46795700  | -0.46808200 | 0.35998500  | F | -0.31339700 | 2.23537000  | 1.57359100  |
| C      | -2.04621500 | -0.65191200 | -0.22553800 | C | 0.18606700  | 3.46708100  | -0.31612000 |
| H      | -1.83844300 | 0.18325200  | -0.90224000 | F | -0.21389500 | 4.56197000  | 0.33021500  |
| C      | -0.70616400 | -1.46072800 | -0.24873800 | C | 0.67854300  | 3.56228300  | -1.60857800 |
| C      | -3.06505500 | -0.71625100 | 2.08851800  | F | 0.74589300  | 4.74088300  | -2.21956100 |
| H      | -2.53773700 | -1.64645900 | 2.30542200  | C | 1.10944600  | 2.41006200  | -2.24860100 |
| H      | -4.04238900 | -0.97896800 | 1.66269600  | F | 1.61802300  | 2.48213800  | -3.47688100 |
| C      | -3.30602400 | 0.06343100  | 3.38018800  | C | 1.02121800  | 1.18905900  | -1.59073900 |
| H      | -2.35841800 | 0.30051700  | 3.87811400  | F | 1.51673200  | 0.13291100  | -2.25179900 |
| H      | -3.86801600 | -0.58340100 | 4.06119500  | C | -0.49987200 | -1.78991700 | -1.74353800 |
| C      | -4.06184900 | 1.35558500  | 3.09307800  | H | -1.26304600 | -2.50283100 | -2.07498700 |
| H      | -5.05392200 | 1.11461700  | 2.68894300  | H | -0.59647600 | -0.89718700 | -2.36885900 |
| H      | -4.21529900 | 1.93139800  | 4.01013500  | H | 0.47672900  | -2.22698200 | -1.93844300 |
| C      | -3.26808600 | 2.16116000  | 2.07081200  | C | -0.78199100 | -2.79375200 | 0.52352800  |
| H      | -3.81319000 | 3.06017300  | 1.76659400  | H | 0.20083000  | -3.25451900 | 0.60383000  |
| H      | -2.32311300 | 2.48940700  | 2.51113600  | H | -1.15901200 | -2.68379300 | 1.54270800  |
| C      | -2.98594800 | 1.33673500  | 0.81945100  | H | -1.42299900 | -3.51128900 | 0.00292800  |
| H      | -3.93739900 | 1.10359600  | 0.31408000  | C | 0.18377300  | -0.34674300 | 2.26419200  |
| H      | -2.37527600 | 1.91100700  | 0.11834300  | H | 0.43213400  | -1.38649200 | 2.46972900  |
|        |             |             |             | H | -0.55951200 | -0.07071200 | 3.02537700  |

|       |             |             |             |        |             |             |             |
|-------|-------------|-------------|-------------|--------|-------------|-------------|-------------|
| H     | 1.01155100  | 0.32255200  | 2.46807200  | C      | 2.87984500  | -2.01279700 | 0.20323900  |
|       |             |             |             | F      | 2.18798500  | -3.15694900 | 0.02092600  |
| N16_P |             |             |             | C      | 0.40283200  | 1.02995700  | -0.13938100 |
| N     | -2.39321400 | 0.06740500  | 0.89467200  | C      | -0.13639200 | 2.17436300  | 0.43924200  |
| H     | -1.54297200 | 0.50201100  | 1.27399800  | F      | -0.58104100 | 2.14723500  | 1.72648300  |
| B     | 0.62161000  | -0.44100400 | 0.64670400  | C      | -0.31938100 | 3.39237600  | -0.20268400 |
| C     | -1.88956400 | -0.87823300 | -0.21628800 | F      | -0.89198500 | 4.41710700  | 0.43558800  |
| H     | -1.67993900 | -0.15413400 | -1.00752800 | C      | 0.09155600  | 3.52627300  | -1.51875400 |
| C     | -0.50323200 | -1.55941300 | 0.03535900  | F      | -0.07312400 | 4.67613000  | -2.16784500 |
| C     | -3.09494000 | -0.53829000 | 2.07299400  | C      | 0.67408100  | 2.43453700  | -2.14705900 |
| H     | -2.45695900 | -1.33106400 | 2.46101400  | F      | 1.08911100  | 2.54735400  | -3.40767400 |
| H     | -4.02547000 | -0.97317700 | 1.70076900  | C      | 0.82455200  | 1.23723500  | -1.45521300 |
| C     | -3.37419100 | 0.53296800  | 3.12146500  | F      | 1.43545200  | 0.25715300  | -2.13669500 |
| H     | -2.42521800 | 0.96422300  | 3.46449200  | C      | -0.16287800 | -2.07213700 | -1.38481600 |
| H     | -3.83883700 | 0.04889000  | 3.98490000  | H      | -0.84707300 | -2.87502600 | -1.68667400 |
| C     | -4.27462600 | 1.62715900  | 2.54969400  | H      | -0.23701000 | -1.27696800 | -2.13210700 |
| H     | -5.25109300 | 1.19598500  | 2.29346400  | H      | 0.84816200  | -2.46640000 | -1.43141100 |
| H     | -4.45153000 | 2.40585200  | 3.29569300  | C      | -0.59282700 | -2.78336700 | 0.96524600  |
| C     | -3.62991300 | 2.22841400  | 1.30215000  | H      | 0.40578800  | -3.17746300 | 1.14893700  |
| H     | -4.31470100 | 2.91849100  | 0.80048700  | H      | -1.01726400 | -2.55380800 | 1.94749700  |
| H     | -2.74091200 | 2.80361300  | 1.57518200  | H      | -1.17657400 | -3.59419800 | 0.51619000  |
| C     | -3.24864800 | 1.15157200  | 0.29395700  | C      | 0.49597300  | -0.31381300 | 2.28923800  |
| H     | -4.13072500 | 0.64263800  | -0.10829000 | H      | 0.87965800  | -1.23882700 | 2.73414400  |
| H     | -2.68056400 | 1.57504800  | -0.53766800 | H      | -0.50019000 | -0.17267100 | 2.73551900  |
| C     | -3.03183500 | -1.73767300 | -0.73005900 | H      | 1.11427900  | 0.50330000  | 2.67236600  |
| C     | -3.52098500 | -1.47316100 | -2.01418800 |        |             |             |             |
| H     | -3.07995100 | -0.66412300 | -2.59161900 | N17_TS |             |             |             |
| C     | -4.54298700 | -2.23473100 | -2.57217600 | B      | 0.01043700  | -0.35717900 | -0.21479600 |
| H     | -4.89681000 | -2.01118200 | -3.57327500 | N      | -2.62797300 | -1.46734900 | -0.76300800 |
| C     | -5.10348500 | -3.28069000 | -1.84672200 | H      | -1.35729700 | -0.93626000 | -1.31043800 |
| H     | -5.90028000 | -3.87914500 | -2.27606500 | C      | -2.35848200 | -1.08825700 | 0.64232200  |
| C     | -4.62999100 | -3.55920000 | -0.56776900 | H      | -2.62493100 | -0.02180200 | 0.70856400  |
| H     | -5.05557100 | -4.37810700 | 0.00319200  | C      | -0.84757300 | -1.22273300 | 0.86204700  |
| C     | -3.60202600 | -2.80038600 | -0.01575800 | H      | -0.60611100 | -2.28738000 | 0.74701600  |
| H     | -3.23978300 | -3.05066300 | 0.97459600  | C      | -3.90494400 | -0.93903200 | -1.31364200 |
| C     | 2.24562600  | -0.79576100 | 0.44668500  | H      | -4.57811700 | -0.68704600 | -0.48519700 |
| C     | 3.16010900  | 0.24107000  | 0.68151200  | H      | -3.71825800 | -0.02790800 | -1.88331200 |
| F     | 2.73032500  | 1.47403200  | 1.01367900  | C      | -4.49546800 | -2.07303200 | -2.15356400 |
| C     | 4.54095900  | 0.11761100  | 0.62034200  | H      | -4.07997400 | -2.05199400 | -3.16702600 |
| F     | 5.32714000  | 1.17159500  | 0.84606000  | H      | -5.58209200 | -2.00467700 | -2.23281300 |
| C     | 5.10445100  | -1.11514400 | 0.33364200  | C      | -4.00561200 | -3.31990300 | -1.41689400 |
| F     | 6.42641400  | -1.26194500 | 0.26676900  | H      | -4.05752700 | -4.23275700 | -2.01375900 |
| C     | 4.25938600  | -2.18966000 | 0.12985800  | H      | -4.58611000 | -3.47136800 | -0.49964900 |
| F     | 4.76718800  | -3.39664200 | -0.12802200 | C      | -2.57435100 | -2.92340600 | -1.06842100 |

|       |             |             |             |   |             |             |             |
|-------|-------------|-------------|-------------|---|-------------|-------------|-------------|
| H     | -1.91984200 | -3.06989800 | -1.93738800 | H | -2.15469500 | -0.8714700  | -1.26353800 |
| H     | -2.14512900 | -3.48397200 | -0.23713900 | C | -2.12718400 | -2.28485000 | 0.70009100  |
| C     | -3.19132900 | -1.85149000 | 1.67705700  | H | -2.40307000 | -0.26322400 | 1.00069700  |
| H     | -3.00926900 | -2.92948400 | 1.57521400  | C | -0.59973500 | -1.8225000  | 0.61423600  |
| H     | -4.26203300 | -1.68835800 | 1.50233600  | H | -0.36239100 | -2.4272200  | 0.36568600  |
| C     | -2.80877500 | -1.42890000 | 3.09737500  | C | -4.16761400 | -0.9383400  | -0.78757100 |
| H     | -3.05960900 | -0.36926500 | 3.24158600  | H | -4.59335300 | -0.95235500 | 0.21666700  |
| H     | -3.39655700 | -1.99561000 | 3.82635600  | H | 4.15087600  | 0.08703800  | -1.15494500 |
| C     | -1.31078700 | -1.62611900 | 3.33133800  | C | -4.86182400 | -0.94643800 | -1.69888000 |
| H     | -1.06587200 | -2.69344600 | 3.24308700  | H | -4.70884500 | -1.68154700 | -2.74969900 |
| H     | -1.04220900 | -1.32086200 | 4.34791700  | H | -5.93558600 | -1.98753300 | -1.51036200 |
| C     | -0.49494600 | -0.83371400 | 2.30917700  | C | -4.13288300 | -3.25212100 | -1.37052800 |
| H     | 0.57570800  | -0.97236900 | 2.48337800  | H | -4.27706700 | -4.03071700 | -2.12099300 |
| H     | -0.69936800 | 0.23611200  | 2.45489900  | H | -4.46262000 | -3.64151900 | -0.40155900 |
| C     | -0.26231700 | 1.24229300  | -0.05790900 | C | -2.67872800 | -2.80421500 | -1.29504600 |
| C     | 0.48239800  | 1.99166300  | 0.85279900  | H | -2.24033000 | -2.69274500 | -2.28880100 |
| F     | 1.43628100  | 1.40041500  | 1.58778800  | H | -2.02270900 | -3.43572700 | -0.69874600 |
| C     | 0.30244100  | 3.35158800  | 1.06392500  | C | -2.75090500 | -2.28263600 | 1.67736800  |
| F     | 1.04923500  | 4.00680000  | 1.95031000  | H | -2.50815300 | -3.30583000 | 1.36227400  |
| C     | -0.66585300 | 4.03236400  | 0.33906700  | H | -3.84451000 | -2.20062200 | 1.70415300  |
| F     | -0.85318000 | 5.33562700  | 0.52369500  | C | -2.18053100 | -2.05926100 | 3.08155600  |
| C     | -1.43765100 | 3.33448300  | -0.57546700 | H | -2.49649900 | -1.07156700 | 3.44246800  |
| F     | -2.37550100 | 3.96658100  | -1.28050200 | H | -2.60352900 | -2.79860800 | 3.76835900  |
| C     | -1.22174100 | 1.97239700  | -0.74713100 | C | -0.65452800 | -2.12539200 | 3.06222900  |
| F     | -2.01729100 | 1.36527800  | -1.65068100 | H | -0.33360700 | -3.14082100 | 2.79337000  |
| C     | 1.59833000  | -0.70953100 | -0.29676700 | H | -0.25998800 | -1.92085500 | 4.06278300  |
| C     | 2.21552300  | -1.81226500 | 0.29327500  | C | -0.08549200 | -1.13498300 | 2.04700800  |
| F     | 1.52116400  | -2.71228500 | 1.00870900  | H | 1.00499000  | -1.16778900 | 2.05710300  |
| C     | 3.57947200  | -2.07451100 | 0.20230900  | H | -0.36211100 | -0.11628700 | 2.35474100  |
| F     | 4.09792400  | -3.15032100 | 0.79312700  | C | -0.35668400 | 1.15819700  | -0.18591800 |
| C     | 4.39986900  | -1.21567300 | -0.50875500 | C | 0.25932400  | 1.95533200  | 0.78215600  |
| F     | 5.70287300  | -1.45536200 | -0.61044500 | F | 1.32632600  | 1.49996900  | 1.45551200  |
| C     | 3.83955100  | -0.10396600 | -1.12122600 | C | -0.15332000 | 3.23685200  | 1.12201900  |
| F     | 4.60825300  | 0.73389200  | -1.81405400 | F | 0.49507400  | 3.93722600  | 2.05185400  |
| C     | 2.47647200  | 0.11882200  | -1.00173100 | C | -1.25642000 | 3.79425800  | 0.49050400  |
| F     | 2.00926200  | 1.20645800  | -1.63860100 | F | -1.67696800 | 5.01612400  | 0.81059700  |
| C     | -0.36541400 | -0.79038600 | -2.12057800 | C | -1.91924300 | 3.04925600  | -0.46892900 |
| H     | 0.27151800  | 0.05642300  | -2.36573500 | F | -2.99834400 | 3.54371100  | -1.08168500 |
| H     | 0.16415000  | -1.72833600 | -2.28274100 | C | -1.45175300 | 1.77678700  | -0.77572900 |
| H     | -1.18150800 | 0.72030800  | -2.85588400 | F | -2.19170600 | 1.12659500  | -1.72208800 |
|       |             |             |             | C | 1.79059900  | -0.52271300 | -0.40478600 |
| N17_P |             |             |             | C | 2.48671700  | -1.65611300 | 0.00445500  |
| B     | 0.14132900  | -0.39575100 | -0.51859200 | F | 1.83780200  | -2.74567200 | 0.46880300  |
| N     | -2.73962300 | -1.4075700  | -0.68513500 | C | 3.87303500  | -1.77685800 | -0.01949900 |

|        |             |             |             |       |             |             |             |
|--------|-------------|-------------|-------------|-------|-------------|-------------|-------------|
| F      | 4.46277300  | -2.89727600 | 0.40514800  | C     | -3.02971300 | -2.01540100 | -3.0659200  |
| C      | 4.64117800  | -0.73063900 | -0.49883200 | H     | -3.26658500 | -3.04972100 | -3.3263300  |
| F      | 5.96967000  | -0.82526800 | -0.53837900 | H     | -2.07562800 | -1.77188300 | -3.4664800  |
| C      | 4.00242400  | 0.41630500  | -0.94700700 | C     | -4.11083600 | -1.05945600 | -3.56181700 |
| F      | 4.72308000  | 1.43095700  | -1.42792600 | H     | -5.08637800 | -1.37634100 | -3.16932500 |
| C      | 2.61773200  | 0.48600300  | -0.90103500 | H     | -4.17860100 | -1.08863600 | -4.65301700 |
| F      | 2.07823700  | 1.61738900  | -1.38839900 | C     | -3.80754400 | 0.35294100  | -3.0686900  |
| C      | -0.09046900 | -0.82147000 | -2.10704300 | H     | -2.88778600 | 0.73058400  | -3.5319940  |
| H      | 0.56784300  | -0.20316600 | -2.72716000 | H     | -4.60929900 | 1.04593900  | -3.34110200 |
| H      | 0.23285800  | -1.86085300 | -2.25482700 | C     | -3.64977900 | 0.35903800  | -1.55308100 |
| H      | -1.07072200 | -0.71889100 | -2.59460700 | H     | -3.40027600 | 1.35814300  | -1.1920500  |
| N18_TS |             |             |             | H     | -4.59997300 | 0.05419700  | -1.0028900  |
|        |             |             |             | B     | 0.34908200  | -0.14672400 | -0.32224100 |
| C      | -2.99396300 | -0.66800500 | 1.61816300  | C     | 1.78940400  | -0.90569400 | -0.40423500 |
| C      | -2.17922000 | -0.31806400 | 0.30526300  | F     | 1.13051200  | -2.89315400 | 0.75732400  |
| H      | -2.09213000 | 0.77432100  | 0.30422700  | C     | 2.06801000  | -2.16434600 | 0.12716900  |
| C      | -0.78104500 | -0.90442000 | 0.54028200  | F     | 3.50767600  | -3.97764100 | 0.59667100  |
| H      | -0.78009600 | -1.93029000 | 0.16410600  | C     | 3.31796300  | -2.77278900 | 0.05997000  |
| C      | -0.79426600 | -1.03680600 | 2.07948300  | F     | 5.56649700  | -2.69103300 | -0.63946800 |
| H      | 0.08578800  | -1.54153600 | 2.48495800  | C     | 4.36729100  | -2.12326300 | -0.56708700 |
| C      | -1.09237000 | 0.33652100  | 2.73806700  | F     | 5.14064200  | -0.22888400 | -1.73340700 |
| H      | -0.51929100 | 1.14070000  | 2.27668800  | C     | 4.14676000  | -0.87050500 | -1.12181500 |
| H      | -0.83018000 | 0.33236000  | 3.79853500  | F     | 2.75002900  | 0.90790500  | -1.59798900 |
| C      | -2.62371200 | 0.52833500  | 2.52573600  | C     | 2.88568900  | -0.30287600 | -1.02779400 |
| H      | -2.87162000 | 1.48579100  | 2.05574100  | C     | 0.49255700  | 1.45133000  | -0.04973200 |
| H      | -3.17846300 | 0.48002400  | 3.46722700  | F     | 2.17261000  | 1.06271200  | 1.57044500  |
| C      | -2.14184400 | -1.78924400 | 2.30474800  | C     | 1.41549600  | 1.92821100  | 0.88111500  |
| C      | -4.48681100 | -0.90879600 | 1.49478800  | F     | 2.48425700  | 3.66241900  | 2.08069000  |
| H      | -4.72121800 | -1.75469400 | 0.84041100  | C     | 1.58656600  | 3.27214100  | 1.17849500  |
| H      | -5.00363200 | -0.02410900 | 1.10886700  | F     | 0.94704200  | 5.51108100  | 0.80619700  |
| H      | -4.91411900 | -1.12583900 | 2.47975600  | C     | 0.80242800  | 4.21829200  | 0.53152400  |
| C      | -2.25692400 | -3.17508500 | 1.65924800  | F     | -0.91481700 | 4.68794600  | -1.01193500 |
| H      | -2.37025800 | -3.15779000 | 0.57845300  | C     | -0.14187500 | 3.79743900  | -0.39063500 |
| H      | -3.13166200 | -3.69831200 | 2.06014100  | F     | -1.23169900 | 2.11131500  | -1.55108600 |
| H      | -1.37287700 | -3.77735300 | 1.89507400  | C     | -0.27446800 | 2.43894200  | -0.65454900 |
| C      | -2.45128600 | -2.00661700 | 3.79463200  | C     | -0.09577000 | -0.30095300 | -2.25114400 |
| H      | -3.50683800 | -2.26138100 | 3.94151100  | H     | -0.76492600 | 0.12634400  | -3.01176000 |
| H      | -2.22006700 | -1.15248500 | 4.43071300  | H     | 0.78891500  | 0.32346900  | -2.37140200 |
| H      | -1.86225800 | -2.85400000 | 4.16029400  | H     | 0.13959100  | -1.32799800 | -2.53706000 |
| N      | -2.58137900 | -0.56109300 | -1.10329600 | N18_P |             |             |             |
| H      | -1.24208100 | -0.29069600 | -1.57958000 | C     | -2.52429000 | 1.22664700  | -1.76963300 |
| C      | -2.85967800 | -1.94197200 | -1.54725000 | C     | -2.00032500 | 0.61811800  | -0.41587800 |
| H      | -3.76486300 | -2.32096200 | -1.05146400 | H     | -2.02679700 | -0.46869700 | -0.53182800 |
| H      | -2.02004500 | -2.57396800 | -1.25448300 |       |             |             |             |

|   |             |             |             |        |             |             |             |
|---|-------------|-------------|-------------|--------|-------------|-------------|-------------|
| C | -0.53808700 | 1.07459600  | -0.27623200 | F      | 4.04937500  | 3.63904300  | 0.12791800  |
| H | -0.53206400 | 2.02346700  | 0.26872000  | C      | 3.75277500  | 2.35826900  | 0.36564400  |
| C | -0.26774100 | 1.46823400  | -1.75112600 | F      | 6.02640600  | 1.86869700  | 0.76991100  |
| H | 0.70049800  | 1.95145000  | -1.88914400 | C      | 4.75771500  | 1.46746500  | 0.69744100  |
| C | -0.49449400 | 0.25385900  | -2.68440000 | F      | 5.36561400  | -0.72109300 | 1.31741300  |
| H | -0.03428000 | -0.64806100 | -2.28458500 | C      | 4.41690200  | 0.15088200  | 0.97078300  |
| H | -0.05365000 | 0.42145400  | -3.66967700 | F      | 2.84453200  | -1.51568400 | 1.23390700  |
| C | -2.04537200 | 0.14214600  | -2.76908800 | C      | 3.08703800  | -0.23599900 | 0.90128900  |
| H | -2.41996400 | -0.85098100 | -2.49878500 | C      | 0.27263000  | -1.49966300 | 0.15095500  |
| H | -2.42196200 | 0.36229300  | -3.77195900 | F      | 2.13009500  | -1.50827000 | -1.32473600 |
| C | -1.49502900 | 2.36164900  | -2.09092500 | C      | 1.11859500  | -2.16499200 | -0.73933600 |
| C | -3.99506000 | 1.57759400  | -1.90568700 | F      | 1.83322900  | -4.05399100 | -1.97126500 |
| H | -4.32419200 | 2.31223000  | -1.16123300 | C      | 0.97700000  | -3.49288600 | -1.11811800 |
| H | -4.63620700 | 0.69321500  | -1.82975900 | F      | -0.23737300 | -5.51487900 | -0.97286500 |
| H | -4.17444800 | 2.01655200  | -2.89213600 | C      | -0.07686900 | -4.24275300 | -0.61507400 |
| C | -1.64612200 | 3.63782400  | -1.25683900 | F      | -2.02002000 | -4.31137800 | 0.72215800  |
| H | -1.89141000 | 3.46677700  | -0.21210100 | C      | -0.97206100 | -3.63331600 | 0.24573900  |
| H | -2.43812200 | 4.26911700  | -1.67465200 | F      | -1.74739500 | -1.79777900 | 1.41094400  |
| H | -0.71379000 | 4.21124600  | -1.28202600 | C      | -0.77107600 | -2.30312500 | 0.59551200  |
| C | -1.50995000 | 2.83130100  | -3.55429600 | C      | 0.14905600  | 0.25256800  | 2.24199700  |
| H | -2.48635400 | 3.24908700  | -3.82456300 | H      | -0.79855200 | -0.12833800 | 2.65113600  |
| H | -1.26459400 | 2.05491500  | -4.27823100 | H      | 0.91549400  | -0.28498000 | 2.81210300  |
| H | -0.77437300 | 3.63277100  | -3.67556100 | H      | 0.23160300  | 1.30907200  | 2.53560800  |
| N | -2.76561300 | 0.73089500  | 0.90618300  |        |             |             |             |
| H | -2.12554100 | 0.20455900  | 1.51839700  | N19_TS |             |             |             |
| C | -2.93275300 | 2.06200600  | 1.56969800  | B      | 0.53224500  | -0.16183900 | 0.17664100  |
| H | -3.64747800 | 2.63843200  | 0.97506700  | C      | -0.05112400 | -1.00998800 | 1.43475500  |
| H | -1.96279300 | 2.55727000  | 1.55167100  | C      | 0.87575400  | -1.66713500 | 2.25791500  |
| C | -3.40587200 | 1.86701300  | 3.00724800  | H      | 1.92838700  | -1.64260100 | 1.99932100  |
| H | -3.53915100 | 2.85446900  | 3.45740400  | C      | 0.52088000  | -2.33890900 | 3.42655800  |
| H | -2.60685100 | 1.36671000  | 3.56958200  | H      | 1.28803800  | -2.82463200 | 4.02123400  |
| C | -4.69241600 | 1.04602600  | 3.08277500  | C      | -0.80591400 | -2.37247000 | 3.82496500  |
| H | -5.51421000 | 1.60782100  | 2.62053800  | H      | -1.10325200 | -2.88134300 | 4.73626500  |
| H | -4.96852800 | 0.87132600  | 4.12568500  | C      | -1.75556000 | -1.73963600 | 3.02922800  |
| C | -4.50942800 | -0.28061700 | 2.34686000  | H      | -2.80222700 | -1.76210900 | 3.32538400  |
| H | -3.76345800 | -0.90414800 | 2.85603700  | C      | -1.39941000 | -1.08323700 | 1.85229500  |
| H | -5.44076000 | -0.85283400 | 2.32309000  | C      | -2.51785300 | -0.41818100 | 1.09231700  |
| C | -4.05396100 | -0.03885700 | 0.91499700  | H      | -2.34825000 | 0.65823200  | 1.11437800  |
| H | -3.86797600 | -0.97382800 | 0.38419800  | H      | -3.46037600 | -0.59420700 | 1.61901700  |
| H | -4.78627900 | 0.55227700  | 0.36152600  | N      | -2.63812600 | -0.80538400 | -0.33566500 |
| B | 0.45830100  | 0.08975800  | 0.61828400  | C      | -3.01206400 | -2.27733100 | -0.54003300 |
| C | 2.03269400  | 0.60236600  | 0.53310000  | C      | -3.20878400 | -2.54011100 | -2.04410300 |
| F | 1.53664500  | 2.89109000  | 0.03285900  | H      | -2.23733100 | -2.44767100 | -2.54639600 |
| C | 2.43383600  | 1.91673100  | 0.30835800  | H      | -3.51800500 | -3.58484500 | -2.15149300 |



|   |             |             |             |       |             |             |             |
|---|-------------|-------------|-------------|-------|-------------|-------------|-------------|
| C | -4.20353800 | -1.60935200 | -2.71417700 | F     | 1.43987700  | 1.74976200  | -1.86443200 |
| H | -5.20492000 | -1.73935200 | -2.28810100 | H     | -1.25078800 | -0.64358400 | -0.78966200 |
| H | -4.28650800 | -1.84761400 | -3.77881300 | C     | -0.24089200 | -0.64070700 | -1.63458700 |
| C | -3.71854200 | -0.18182700 | -2.53578100 | H     | -0.18708300 | -1.69129000 | -1.91686800 |
| H | -4.42509500 | 0.53268200  | -2.97148400 | H     | 0.71264700  | -0.19481900 | -1.89686200 |
| H | -2.77611200 | -0.05670000 | -3.08151900 | H     | -0.91573500 | -0.11216300 | -2.31717200 |
| C | -3.51797300 | 0.22076600  | -1.06447300 |       |             |             |             |
| C | -2.83049500 | 1.59934800  | -1.06942700 | N19_P |             |             |             |
| H | -1.78510000 | 1.54910500  | -1.37302000 | B     | -0.57351600 | -0.50205800 | 0.36924100  |
| H | -2.88515000 | 2.10880500  | -0.10431000 | C     | 0.03491800  | -1.50711400 | -0.80853000 |
| H | -3.35709400 | 2.23084000  | -1.79041500 | C     | -0.73947900 | -2.62166200 | -1.17806900 |
| C | -4.90073000 | 0.43056800  | -0.41686600 | H     | -1.68288900 | -2.78810000 | -0.66752300 |
| H | -4.83399000 | 0.63398200  | 0.65358700  | C     | -0.38477800 | -3.51732400 | -2.18324800 |
| H | -5.58759800 | -0.40060400 | -0.57115200 | H     | -1.03884900 | -4.35253400 | -2.41557700 |
| H | -5.35379900 | 1.31166900  | -0.88065900 | C     | 0.77860100  | -3.31390900 | -2.91477000 |
| C | -4.26794300 | -2.70708500 | 0.23602900  | H     | 1.04632100  | -3.96465200 | -3.74060400 |
| H | -4.15104200 | -2.54416800 | 1.31021600  | C     | 1.59902600  | -2.25448200 | -2.55420200 |
| H | -4.39465800 | -3.78432200 | 0.09295800  | H     | 2.52024900  | -2.08413600 | -3.10832100 |
| H | -5.18705700 | -2.22420700 | -0.09237400 | C     | 1.27196300  | -1.40428300 | -1.49154200 |
| C | -1.88076000 | -3.22334300 | -0.08422200 | C     | 2.32158500  | -0.37742900 | -1.15296600 |
| H | -0.88958300 | -2.88547000 | -0.38102100 | H     | 1.90054600  | 0.62360400  | -1.13433300 |
| H | -2.06193100 | -4.19465000 | -0.55522900 | H     | 3.12404600  | -0.39627600 | -1.88981900 |
| H | -1.87073100 | -3.37735700 | 0.99401100  | N     | 2.98524600  | -0.55504900 | 0.21141400  |
| C | 2.08092000  | -0.59134800 | -0.13354400 | C     | 3.72732100  | -1.91751700 | 0.40872700  |
| C | 2.38748100  | -1.89282100 | -0.53316900 | C     | 4.47510200  | -1.89106600 | 1.75196500  |
| F | 1.40541500  | -2.80151800 | -0.66538400 | H     | 3.73465400  | -1.93325000 | 2.56265400  |
| C | 3.67147600  | -2.34464100 | -0.79489800 | H     | 5.04603700  | -2.82299100 | 1.80414800  |
| F | 3.88867800  | -3.60270500 | -1.17565100 | C     | 5.36510800  | -0.68154200 | 1.96378100  |
| C | 4.73933900  | -1.47035100 | -0.64368000 | H     | 6.14399100  | -0.61775300 | 1.19547300  |
| F | 5.98100900  | -1.87856600 | -0.88512500 | H     | 5.87836700  | -0.75862000 | 2.92606100  |
| C | 4.49460600  | -0.17182300 | -0.23010400 | C     | 4.47330000  | 0.54475600  | 1.94520200  |
| F | 5.50967300  | 0.67485100  | -0.06775200 | H     | 5.03935000  | 1.46111000  | 2.13822700  |
| C | 3.18790400  | 0.23892100  | 0.01976600  | H     | 3.73272700  | 0.45793700  | 2.75180100  |
| F | 3.05692800  | 1.50415800  | 0.43956600  | C     | 3.73177800  | 0.75635700  | 0.61836400  |
| C | 0.31427800  | 1.45448800  | 0.21284400  | C     | 2.69704500  | 1.85927700  | 0.86958600  |
| C | -0.26752600 | 2.16072900  | 1.26519400  | H     | 1.94725500  | 1.54843300  | 1.60184200  |
| F | -0.68204000 | 1.54874000  | 2.38265500  | H     | 2.18424400  | 2.20561000  | -0.02917500 |
| C | -0.48495200 | 3.53689900  | 1.24984500  | H     | 3.23301400  | 2.71511200  | 1.28936100  |
| F | -1.06964300 | 4.13474700  | 2.28717600  | C     | 4.69486100  | 1.20760000  | -0.48091200 |
| C | -0.08153400 | 4.28486200  | 0.15839500  | H     | 4.17462100  | 1.45579600  | -1.40739200 |
| F | -0.27924700 | 5.59809100  | 0.12566200  | H     | 5.47746500  | 0.48135300  | -0.69959200 |
| C | 0.55367600  | 3.64270700  | -0.89617200 | H     | 5.18208100  | 2.12151900  | -0.13156300 |
| F | 0.98909700  | 4.34853700  | -1.93778200 | C     | 4.68914000  | -2.20598900 | -0.74143600 |
| C | 0.75132700  | 2.27274300  | -0.83549600 | H     | 4.17253900  | -2.26480400 | -1.69966000 |

|        |             |             |             |   |             |             |             |
|--------|-------------|-------------|-------------|---|-------------|-------------|-------------|
| H      | 5.12512400  | -3.19125100 | -0.55499600 | H | 3.08258300  | -0.25159900 | 2.96661000  |
| H      | 5.51209900  | -1.49484500 | -0.81887800 | C | 1.35814700  | -0.16088600 | 1.69871000  |
| C      | 2.70349300  | -3.06035900 | 0.51797600  | C | 1.97013800  | 0.95874500  | 0.89916500  |
| H      | 1.87418400  | -2.79449300 | 1.17755200  | H | 2.87613800  | 1.31814200  | 1.39918800  |
| H      | 3.22679100  | -3.90967100 | 0.96744200  | H | 1.27875000  | 1.79588700  | 0.82806800  |
| H      | 2.29658000  | -3.37776600 | -0.43939800 | N | 2.30308300  | 0.52127400  | -0.48934700 |
| C      | -2.22373100 | -0.72188100 | 0.44225100  | C | 2.56892000  | 1.69802800  | -1.42493800 |
| C      | -2.94430400 | -1.29447200 | 1.48884000  | C | 3.61297800  | 2.61742100  | -0.78125500 |
| F      | -2.33530500 | -1.80866200 | 2.57159500  | H | 3.90941100  | 3.36042000  | -1.52816400 |
| C      | -4.33272100 | -1.40862800 | 1.50720100  | H | 3.13651000  | 3.17646600  | 0.02988300  |
| F      | -4.95010500 | -1.96149700 | 2.55417000  | C | 4.84545400  | 1.85860500  | -0.26058200 |
| C      | -5.07482900 | -0.95686400 | 0.43080900  | C | 4.74045500  | 0.34674000  | -0.29558100 |
| F      | -6.40288500 | -1.06109800 | 0.43020600  | C | 5.92168500  | -0.38607500 | -0.22635600 |
| C      | -4.41019400 | -0.40605900 | -0.65488700 | C | 5.89623300  | -1.77331300 | -0.25448200 |
| F      | -5.10431000 | 0.01741400  | -1.71303300 | H | 6.81941400  | -2.34133800 | -0.20342300 |
| C      | -3.02616300 | -0.31195100 | -0.62625800 | C | 4.67765800  | -2.42456700 | -0.35089000 |
| F      | -2.45946400 | 0.19827300  | -1.73070600 | H | 4.65401800  | -3.50946100 | -0.37040900 |
| C      | -0.41475800 | 1.12551600  | 0.01585500  | C | 3.46454500  | -1.72914200 | -0.42413400 |
| C      | -0.22230800 | 1.67677500  | -1.25316900 | C | 3.51033700  | -0.32615000 | -0.41280100 |
| F      | -0.04787200 | 0.89788300  | -2.33194900 | C | 2.19144400  | -2.54429300 | -0.53332800 |
| C      | -0.12718300 | 3.04119200  | -1.51357200 | H | 1.34966800  | -1.89176300 | -0.32864100 |
| F      | 0.08556400  | 3.48047000  | -2.75576700 | C | 2.11857100  | -3.65510100 | 0.51953500  |
| C      | -0.26587400 | 3.94867800  | -0.47546100 | H | 1.12152800  | -4.10207700 | 0.50615100  |
| F      | -0.17953200 | 5.25798100  | -0.70158900 | H | 2.29707000  | -3.25166900 | 1.51961200  |
| C      | -0.49350200 | 3.46443900  | 0.80312700  | H | 2.84492600  | -4.45167400 | 0.32815700  |
| F      | -0.63008400 | 4.31616000  | 1.82142600  | C | 2.03567800  | -3.11569200 | -1.94676300 |
| C      | -0.57612200 | 2.09210700  | 1.01064200  | H | 1.08226800  | -3.64579600 | -2.03495500 |
| F      | -0.78233400 | 1.73312300  | 2.28866200  | H | 2.84303200  | -3.82165800 | -2.16954300 |
| H      | 2.18850900  | -0.61352600 | 0.86222700  | H | 2.06408700  | -2.32625100 | -2.70535100 |
| C      | 0.08467300  | -0.86998500 | 1.84290400  | C | 1.29900000  | 2.51859100  | -1.68080700 |
| H      | 0.12258500  | -1.95488800 | 1.99127400  | H | 0.84676900  | 2.90153800  | -0.76339000 |
| H      | -0.50304200 | -0.47002600 | 2.66703900  | H | 0.54053000  | 1.96361000  | -2.23603400 |
| H      | 1.09738500  | -0.48077300 | 2.04924000  | H | 1.58141800  | 3.38471300  | -2.28608500 |
| N20_TS |             |             |             | C | 3.08727400  | 1.16923500  | -2.77102000 |
| B      | -0.85467300 | -0.12659800 | 0.16942100  | H | 2.45595800  | 0.36857400  | -3.16609900 |
| C      | 0.07052300  | -0.66033200 | 1.39337700  | H | 4.10572500  | 0.78415300  | -2.70576300 |
| C      | -0.42635400 | -1.64250500 | 2.26046700  | H | 3.07763200  | 1.98914500  | -3.49409000 |
| H      | -1.42102700 | -2.04414000 | 2.09616900  | C | -2.16566600 | -1.08482100 | -0.07048100 |
| C      | 0.28864300  | -2.11247900 | 3.36210300  | C | -3.49309500 | -0.66022400 | 0.01286200  |
| H      | -0.15340100 | -2.86364900 | 4.00930700  | F | -3.81474800 | 0.60274300  | 0.32103100  |
| C      | 1.55953500  | -1.62322600 | 3.62276500  | C | -4.58801700 | -1.49614800 | -0.19018600 |
| H      | 2.13360800  | -1.98496200 | 4.46982400  | F | -5.82573100 | -1.01337700 | -0.09953300 |
| C      | 2.08853700  | -0.65034800 | 2.77817500  | C | -4.39148900 | -2.83535100 | -0.47624100 |
|        |             |             |             | F | -5.42618600 | -3.64624500 | -0.66831400 |

|       |             |             |             |   |             |             |             |
|-------|-------------|-------------|-------------|---|-------------|-------------|-------------|
| C     | -3.09371100 | -3.32057300 | -0.54577200 | C | 5.02420200  | 1.94401100  | 0.10063600  |
| F     | -2.87633700 | -4.61069100 | -0.79788200 | C | 4.89256400  | 0.47428500  | 0.42978600  |
| C     | -2.03409500 | -2.45204400 | -0.33432200 | C | 5.89702300  | -0.16970800 | 1.14863700  |
| F     | -0.81375300 | -3.02031100 | -0.38224200 | C | 5.78132800  | -1.51758400 | 1.46028000  |
| C     | -1.24681100 | 1.46581600  | 0.21408100  | H | 6.56716800  | -2.01508600 | 2.01889400  |
| C     | -1.92307400 | 2.10275000  | -0.83195500 | C | 4.66082300  | -2.23243000 | 1.05656200  |
| F     | -2.35850900 | 1.39782700  | -1.89085800 | H | 4.57834000  | -3.28082200 | 1.31824700  |
| C     | -2.22728100 | 3.45364100  | -0.86946700 | C | 3.62476700  | -1.63300000 | 0.33431700  |
| F     | -2.85648700 | 3.97987300  | -1.91870200 | C | 3.78432800  | -0.27520800 | 0.03335600  |
| C     | -1.89170500 | 4.25640900  | 0.21216500  | C | 2.40220400  | -2.43865600 | -0.07850600 |
| F     | -2.17345500 | 5.55452000  | 0.20255600  | H | 1.53049600  | -1.77892800 | -0.06438900 |
| C     | -1.27867700 | 3.67385200  | 1.30725900  | C | 2.08072200  | -3.55935200 | 0.91401600  |
| F     | -0.97311300 | 4.41466300  | 2.37158400  | H | 1.10070900  | -3.97563800 | 0.67791000  |
| C     | -0.99442300 | 2.30929700  | 1.29712200  | H | 2.05015800  | -3.17371500 | 1.93664600  |
| F     | -0.41352500 | 1.85962400  | 2.41700500  | H | 2.81265300  | -4.37212100 | 0.85876800  |
| H     | 6.86667200  | 0.14607900  | -0.15307100 | C | 2.55006600  | -3.00481200 | -1.49678900 |
| H     | 5.73366900  | 2.13982100  | -0.83408400 | H | 1.64452800  | -3.55602100 | -1.76418400 |
| H     | 5.05349700  | 2.16703100  | 0.77113400  | H | 3.40758200  | -3.68277500 | -1.55705100 |
| H     | 1.01756600  | -0.00644200 | -0.90117600 | H | 2.69409500  | -2.22054300 | -2.24906200 |
| C     | -0.04360500 | -0.44570200 | -1.62070000 | C | 2.42246700  | 1.91256100  | -2.79951300 |
| H     | -0.89707200 | 0.05858900  | -2.06184100 | H | 1.66363800  | 2.51580900  | -2.30100700 |
| H     | 0.74526300  | -0.20554200 | -2.34934700 | H | 1.92398000  | 1.14788700  | -3.40001100 |
| H     | -0.15434500 | -1.52065100 | -1.70047400 | H | 2.97065900  | 2.56754100  | -3.48258300 |
| N20_P |             |             |             | C | 4.36864000  | 0.37868100  | -2.65104600 |
| B     | -1.04404500 | 0.00214300  | -0.34165900 | H | 3.82339500  | -0.49460100 | -3.02177700 |
| C     | -0.09319700 | -0.24269300 | 0.99556800  | H | 5.23306600  | 0.03426400  | -2.08290300 |
| C     | -0.55987500 | -1.04047200 | 2.05540600  | H | 4.72625100  | 0.93598000  | -3.52032200 |
| H     | -1.52906800 | -1.51840400 | 1.95480100  | C | -2.23945200 | -1.14180600 | -0.41514500 |
| C     | 0.14463000  | -1.22882800 | 3.23844500  | C | -3.60721900 | -0.92617800 | -0.56268700 |
| H     | -0.27284500 | -1.85791300 | 4.01938300  | F | -4.12052000 | 0.31264500  | -0.58955300 |
| C     | 1.37267600  | -0.60101000 | 3.42904200  | C | -4.54356500 | -1.94682800 | -0.70827200 |
| H     | 1.92836400  | -0.72666900 | 4.35252700  | F | -5.83978900 | -1.65997500 | -0.84116500 |
| C     | 1.86618200  | 0.20470800  | 2.41397700  | C | -4.12760100 | -3.26741400 | -0.72725200 |
| H     | 2.82284100  | 0.70808900  | 2.54643800  | F | -5.00888300 | -4.25703200 | -0.86968000 |
| C     | 1.15782300  | 0.37828200  | 1.21686100  | C | -2.77408400 | -3.54258100 | -0.60227100 |
| C     | 1.81438600  | 1.25253400  | 0.17894300  | F | -2.34095500 | -4.80629100 | -0.62897300 |
| H     | 2.44880300  | 2.00126200  | 0.65572300  | C | -1.88356100 | -2.48893700 | -0.46116200 |
| H     | 1.09378200  | 1.74340200  | -0.47205000 | F | -0.58107200 | -2.84464500 | -0.36249800 |
| N     | 2.75910200  | 0.45372800  | -0.74610100 | C | -1.65021600 | 1.52605600  | -0.09874600 |
| C     | 3.44707000  | 1.30180900  | -1.84755600 | C | -1.33363600 | 2.66982600  | -0.81788500 |
| C     | 4.23222300  | 2.41035500  | -1.14075300 | F | -0.49879600 | 2.61618500  | -1.88674700 |
| H     | 4.91139200  | 2.83041600  | -1.88801200 | C | -1.79264200 | 3.94808400  | -0.51135900 |
| H     | 3.54405000  | 3.21648700  | -0.87097800 | F | -1.42342500 | 4.99767600  | -1.25260400 |
|       |             |             |             | C | -2.63326400 | 4.12348800  | 0.57231100  |

|        |             |             |             |       |             |             |             |
|--------|-------------|-------------|-------------|-------|-------------|-------------|-------------|
| F      | -3.09083000 | 5.33437300  | 0.88849100  | C     | 3.12770900  | -0.73268900 | -0.37094800 |
| C      | -2.98909700 | 3.01552800  | 1.33194000  | C     | 6.47428600  | 0.89481700  | -0.52717400 |
| F      | -3.80135300 | 3.16772100  | 2.37864000  | H     | 6.88010000  | 1.87617700  | -0.79072300 |
| C      | -2.49306400 | 1.76829500  | 0.98854300  | H     | 7.19848000  | 0.14091400  | -0.84180700 |
| F      | -2.88731800 | 0.74538200  | 1.76074700  | H     | 6.38270800  | 0.84225600  | 0.56216500  |
| H      | 6.77235000  | 0.39521000  | 1.45588700  | C     | 2.73349400  | -4.48010700 | 0.20357800  |
| H      | 6.08674400  | 2.16981600  | -0.02046300 | H     | 1.64299200  | -4.44327100 | 0.14605700  |
| H      | 4.69821600  | 2.52218100  | 0.97369100  | H     | 3.00221300  | -4.75981500 | 1.22739100  |
| H      | 2.15152100  | -0.22889100 | -1.21999300 | H     | 3.08981400  | -5.27205400 | -0.46000900 |
| C      | -0.27288200 | -0.18580700 | -1.78232600 | C     | -0.89749100 | 1.52047000  | -0.07213800 |
| H      | -0.98611500 | -0.09667300 | -2.60970200 | C     | -1.52858000 | 2.11899500  | 1.02199100  |
| H      | 0.49778700  | 0.54980500  | -2.00602700 | F     | -2.05224400 | 1.35051200  | 1.98250000  |
| H      | 0.16385200  | -1.19171000 | -1.86145400 | C     | -1.68874600 | 3.48776000  | 1.16906100  |
| N21_TS |             |             |             | F     | -2.29724500 | 3.99312500  | 2.23963200  |
| B      | -0.71972000 | -0.10106700 | -0.04396400 | C     | -1.21392600 | 4.33987000  | 0.17930800  |
| C      | -0.05201800 | -0.56869700 | 1.37722600  | F     | -1.34853700 | 5.65627700  | 0.30450500  |
| C      | -0.76372200 | -1.43098300 | 2.22391400  | C     | -0.60738300 | 3.79723000  | -0.93984200 |
| H      | -1.73631500 | -1.79612700 | 1.91494100  | F     | -0.14467100 | 4.59223100  | -1.90551200 |
| C      | -0.29746200 | -1.82485300 | 3.47491000  | C     | -0.48260800 | 2.41471100  | -1.05079200 |
| H      | -0.89640300 | -2.49357800 | 4.08508300  | F     | 0.10641700  | 1.98866600  | -2.18637800 |
| C      | 0.92729500  | -1.36190200 | 3.93463100  | C     | -2.09150100 | -0.93053900 | -0.36868000 |
| H      | 1.31114800  | -1.66843700 | 4.90226500  | C     | -3.33691900 | -0.35609400 | -0.61301000 |
| C      | 1.65546500  | -0.49187100 | 3.13194500  | F     | -3.51298700 | 0.97102700  | -0.59174700 |
| H      | 2.61754200  | -0.11881200 | 3.47378500  | C     | -4.48185600 | -1.09570300 | -0.90109200 |
| C      | 1.17445100  | -0.08629300 | 1.88773200  | F     | -5.63992300 | -0.47902900 | -1.12830600 |
| C      | 2.01650500  | 0.88744200  | 1.10835400  | C     | -4.41327000 | -2.47678800 | -0.95700000 |
| H      | 2.97284900  | 1.05131100  | 1.61871200  | F     | -5.49569500 | -3.19688100 | -1.23268400 |
| H      | 1.50254800  | 1.85281900  | 1.03063700  | C     | -3.19626000 | -3.10171100 | -0.72055300 |
| N      | 2.25414700  | 0.43223800  | -0.28395400 | F     | -3.11002100 | -4.43002000 | -0.76855800 |
| C      | 2.73939600  | 1.53650000  | -1.14097100 | C     | -2.08291500 | -2.32711200 | -0.43563800 |
| C      | 4.19040300  | 1.87869200  | -0.84888600 | F     | -0.94258300 | -3.00839200 | -0.20833800 |
| H      | 4.29920800  | 2.14614800  | 0.20980700  | H     | 0.95659100  | -0.03209600 | -0.81115800 |
| H      | 4.48750900  | 2.76053700  | -1.42460000 | H     | 2.08756600  | 2.39669900  | -0.97999200 |
| C      | 5.10381500  | 0.70083400  | -1.18327200 | H     | 2.62168200  | 1.22321400  | -2.18537400 |
| H      | 5.24573800  | 0.68699200  | -2.27373900 | C     | 0.17498100  | -0.65102800 | -1.67198800 |
| C      | 4.45685700  | -0.62254100 | -0.80341400 | H     | -0.64029500 | -0.25414000 | -2.26969000 |
| C      | 5.19427600  | -1.80647400 | -0.92383400 | H     | 1.06600900  | -0.42992000 | -2.27991400 |
| H      | 6.21687200  | -1.75172100 | -1.28560800 | H     | 0.13042200  | -1.73166100 | -1.58524500 |
| C      | 4.65732000  | -3.04430800 | -0.60865100 | N21_P |             |             |             |
| H      | 5.26231300  | -3.94028700 | -0.71934900 | B     | -0.88131100 | -0.43072600 | -0.21411200 |
| C      | 3.33860700  | -3.14981800 | -0.16114800 | C     | -0.19890100 | -1.26596500 | 1.05995200  |
| C      | 2.58671200  | -1.98514500 | -0.05792600 | C     | -0.85960200 | -2.44609600 | 1.44599300  |
| H      | 1.55419300  | -2.05910700 | 0.26368100  | H     | -1.81090600 | -2.68267800 | 0.98223900  |

|   |             |             |             |       |             |             |             |
|---|-------------|-------------|-------------|-------|-------------|-------------|-------------|
| C | -0.36809300 | -3.33922500 | 2.39335000  | F     | -0.75051200 | 1.45640000  | -2.54827000 |
| H | -0.94059500 | -4.22832700 | 2.64026600  | C     | -2.52516500 | -0.69245700 | -0.23821500 |
| C | 0.84658000  | -3.09164200 | 3.01914700  | C     | -3.44950300 | 0.09623500  | 0.44898900  |
| H | 1.24648800  | -3.77433700 | 3.76146100  | F     | -3.05043500 | 1.10145300  | 1.24466600  |
| C | 1.54643400  | -1.94790300 | 2.66217700  | C     | -4.82807500 | -0.07877800 | 0.39251800  |
| H | 2.50912400  | -1.74341500 | 3.12543200  | F     | -5.64172400 | 0.73656400  | 1.06578300  |
| C | 1.04380600  | -1.05266500 | 1.71113400  | C     | -5.35760200 | -1.11171100 | -0.36211700 |
| C | 1.93471300  | 0.12624600  | 1.41609100  | F     | -6.67410300 | -1.30034500 | -0.42793700 |
| H | 2.88099900  | 0.04492000  | 1.95344800  | C     | -4.48919500 | -1.95590300 | -1.03380700 |
| H | 1.46978600  | 1.07951700  | 1.66274700  | F     | -4.97072000 | -2.97910700 | -1.74257000 |
| N | 2.29292300  | 0.19677000  | -0.06246100 | C     | -3.11935000 | -1.73639200 | -0.95184600 |
| C | 2.65088400  | 1.58220900  | -0.51057000 | F     | -2.36844200 | -2.65259100 | -1.58858600 |
| C | 4.01008100  | 1.96079200  | 0.03922600  | H     | 1.42668000  | -0.06490900 | -0.56100700 |
| H | 3.99164600  | 1.91091600  | 1.13499600  | H     | 1.85564400  | 2.24238500  | -0.16222700 |
| H | 4.21831800  | 3.00286100  | -0.21839500 | H     | 2.64645100  | 1.56718200  | -1.60521900 |
| C | 5.11214600  | 1.05463300  | -0.51339800 | C     | -0.23064400 | -1.03824100 | -1.62387900 |
| H | 5.32292400  | 1.37980300  | -1.54225600 | H     | -0.91602100 | -0.89929300 | -2.46175800 |
| C | 4.65419800  | -0.39377600 | -0.60010900 | H     | 0.70471300  | -0.57664600 | -1.98732700 |
| C | 5.56419300  | -1.40532100 | -0.92121200 | H     | -0.04017700 | -2.11223700 | -1.54535400 |
| H | 6.60405400  | -1.14356400 | -1.08900000 |       |             |             |             |
| C | 5.17618900  | -2.73317200 | -1.03744700 | P1_TS |             |             |             |
| H | 5.91846000  | -3.48796500 | -1.28121600 | P     | -1.12312300 | 0.03715700  | -0.33618200 |
| C | 3.84684000  | -3.11384600 | -0.84800600 | C     | -0.72385200 | -1.26102900 | 0.85179500  |
| C | 2.92080700  | -2.11962500 | -0.54158900 | C     | 0.58321100  | -1.75422500 | 0.69695900  |
| H | 1.87766700  | -2.37782900 | -0.38862000 | B     | 1.60015400  | -1.12658300 | -0.37906500 |
| C | 3.32742300  | -0.79466700 | -0.42419800 | C     | -1.61058000 | -1.77555700 | 1.80269900  |
| C | 6.38969500  | 1.22243400  | 0.31334300  | C     | -1.18680300 | -2.80362300 | 2.63485700  |
| H | 6.64963600  | 2.28224500  | 0.38763800  | C     | 0.10881600  | -3.30832900 | 2.50481900  |
| H | 7.24188600  | 0.70427200  | -0.12965700 | C     | 0.97909100  | -2.79034400 | 1.55100700  |
| H | 6.24275900  | 0.83253500  | 1.32514400  | O     | 2.89809800  | -1.78068000 | -0.42867600 |
| C | 3.39943800  | -4.54473900 | -0.98363300 | O     | 1.86274800  | 0.30908700  | -0.17568000 |
| H | 2.69498500  | -4.80737100 | -0.19033500 | C     | 3.19681900  | 0.46686100  | -0.37639500 |
| H | 4.24769400  | -5.23046300 | -0.93615000 | C     | 3.92352200  | 1.63964100  | -0.41965700 |
| H | 2.89198100  | -4.70135300 | -1.94046300 | C     | 5.30744100  | 1.53633800  | -0.63048000 |
| C | -0.66312200 | 1.22359400  | -0.17415200 | C     | 5.91877900  | 0.29830900  | -0.78791900 |
| C | -0.57647900 | 1.97236400  | 1.00134200  | C     | 5.17421500  | -0.89069900 | -0.74001600 |
| F | -0.63512400 | 1.36608700  | 2.19611900  | C     | 3.81429400  | -0.78330000 | -0.53080200 |
| C | -0.39071800 | 3.34847200  | 1.04896800  | H     | 3.43467800  | 2.59892200  | -0.28576800 |
| F | -0.28587500 | 3.98429200  | 2.21664000  | H     | 5.90665500  | 2.44018800  | -0.66914400 |
| C | -0.32401600 | 4.06782500  | -0.13711300 | H     | 6.99027800  | 0.24611600  | -0.95068200 |
| F | -0.15295900 | 5.38709900  | -0.11867400 | H     | 5.63879800  | -1.86310200 | -0.85871300 |
| C | -0.44895500 | 3.38812400  | -1.33736700 | C     | -1.01809000 | 1.68496100  | 0.41838400  |
| F | -0.40309900 | 4.06052100  | -2.48837600 | C     | -2.85647900 | -0.19086900 | -0.83906500 |
| C | -0.62420000 | 2.00530200  | -1.33119500 | C     | -3.67896900 | 0.90532000  | -1.11847900 |

|      |             |             |             |       |             |             |             |
|------|-------------|-------------|-------------|-------|-------------|-------------|-------------|
| C    | -4.97763100 | 0.70365000  | -1.57601600 | C     | 5.32301300  | -1.07954600 | -0.78529600 |
| C    | -5.46187100 | -0.58823200 | -1.76199000 | C     | 4.01117000  | -0.64812100 | -0.74419200 |
| C    | -4.64378100 | -1.68293200 | -1.49289900 | H     | 4.27907400  | 2.04757300  | 1.33150200  |
| C    | -3.34478300 | -1.48873000 | -1.03561100 | H     | 6.66669500  | 1.28763000  | 1.27074800  |
| H    | -3.30634700 | 1.91463300  | -0.97114800 | H     | 7.31509400  | -0.68149000 | -0.06393400 |
| H    | -5.61172600 | 1.55865800  | -1.78670100 | H     | 5.59421600  | -1.94675600 | -1.37777800 |
| H    | -6.47546800 | -0.74239000 | -2.11760900 | C     | -1.38166300 | 1.68146700  | -0.01781400 |
| H    | -5.01790800 | -2.69127300 | -1.63664400 | C     | -3.35015000 | -0.44941600 | -0.39269400 |
| H    | -2.71245000 | -2.34496700 | -0.81736700 | C     | -4.12336000 | 0.04585200  | 0.66162300  |
| C    | -0.12581600 | 2.62310800  | -0.10417900 | C     | -5.44633700 | -0.36318600 | 0.79509500  |
| C    | -0.05343200 | 3.89479800  | 0.45771800  | C     | -5.99605500 | -1.25968600 | -0.11908300 |
| C    | -0.86500900 | 4.22793900  | 1.53798600  | C     | -5.22666600 | -1.75166800 | -1.17034200 |
| C    | -1.75465000 | 3.29135800  | 2.06297800  | C     | -3.90296700 | -1.34903700 | -1.30918100 |
| C    | -1.83286200 | 2.02083700  | 1.50486200  | H     | -3.69424500 | 0.74911800  | 1.36990400  |
| H    | 0.52431900  | 2.34345500  | -0.92637200 | H     | -6.04829200 | 0.01882200  | 1.61264000  |
| H    | 0.64264500  | 4.62265700  | 0.05393500  | H     | -7.02877600 | -1.57495400 | -0.01206500 |
| H    | -0.80218600 | 5.21860300  | 1.97691600  | H     | -5.65578800 | -2.44782100 | -1.88278100 |
| H    | -2.38252500 | 3.55036300  | 2.90907200  | H     | -3.30128100 | -1.73690400 | -2.12706800 |
| H    | -2.52739600 | 1.28995600  | 1.91112000  | C     | -2.32924900 | 2.64866300  | -0.37983900 |
| H    | -2.62379700 | -1.38766100 | 1.87824000  | C     | -2.13758700 | 3.96842200  | 0.00497300  |
| H    | -1.86152500 | -3.21318200 | 3.37976900  | C     | -1.00446700 | 4.32096700  | 0.73987600  |
| H    | 0.43696800  | -4.11428900 | 3.15465500  | C     | -0.06481600 | 3.35812600  | 1.08979000  |
| H    | 1.98646300  | -3.18442700 | 1.45358100  | C     | -0.24664200 | 2.02818000  | 0.71752300  |
| H    | 0.04847600  | -0.49286000 | -1.35442400 | H     | -3.21100100 | 2.37147700  | -0.95143800 |
| C    | 1.01452200  | -1.36698200 | -2.12026800 | H     | -2.86705100 | 4.72254900  | -0.27078400 |
| H    | 1.87744900  | -0.91915400 | -2.62163300 | H     | -0.85476600 | 5.35508900  | 1.03347400  |
| H    | 0.15808400  | -1.17650700 | -2.78353300 | H     | 0.82351900  | 3.63420500  | 1.64710000  |
| H    | 1.11920500  | -2.45504500 | -2.10637700 | H     | 0.51245000  | 1.29033800  | 0.96025100  |
| P1_P |             |             |             | H     | -2.29775500 | -1.90098700 | 1.44171000  |
| P    | -1.60336300 | -0.02213100 | -0.55703100 | H     | -1.00476600 | -3.57049600 | 2.71323700  |
| C    | -0.57593600 | -1.21449900 | 0.30237800  | H     | 1.42642700  | -3.84424100 | 2.25146700  |
| C    | 0.79910300  | -1.32300900 | 0.01207700  | H     | 2.53301500  | -2.45222700 | 0.55151800  |
| B    | 1.74642600  | -0.37388200 | -0.97983400 | H     | -1.37572700 | -0.10075700 | -1.93282200 |
| C    | -1.23272500 | -2.00956800 | 1.26043900  | C     | 1.08151400  | 0.28162900  | -2.30976200 |
| C    | -0.51064500 | -2.95207100 | 1.97142600  | H     | 0.55368200  | -0.43836400 | -2.94972600 |
| C    | 0.85115700  | -3.10065000 | 1.70738000  | H     | 1.91586900  | 0.67263100  | -2.90173200 |
| C    | 1.47586500  | -2.31063400 | 0.75194100  | H     | 0.42273700  | 1.14049100  | -2.12671200 |
| O    | 2.94250400  | -1.19020600 | -1.36158500 | P2_TS |             |             |             |
| O    | 2.31752200  | 0.71656800  | -0.09166300 | C     | -1.35470700 | -1.69685000 | 1.94466200  |
| C    | 3.64149400  | 0.47601400  | 0.01866800  | C     | -0.57654900 | -1.20619300 | 0.89383300  |
| C    | 4.57700400  | 1.18218700  | 0.74855300  | C     | 0.73239300  | -1.65694500 | 0.64710200  |
| C    | 5.91333400  | 0.74658000  | 0.70682500  | C     | 1.24679000  | -2.62041900 | 1.52242200  |
| C    | 6.27807200  | -0.36107000 | -0.04471400 | C     | 0.48806900  | -3.11117200 | 2.58084500  |

|   |             |             |             |       |             |             |             |
|---|-------------|-------------|-------------|-------|-------------|-------------|-------------|
| C | -0.81310200 | -2.65238300 | 2.79569100  | H     | 4.93872900  | -0.76539500 | -2.22369000 |
| H | -2.37171600 | -1.34165900 | 2.09162300  | C     | 4.12262300  | -0.40117000 | 1.11629000  |
| H | 2.25916400  | -2.97837400 | 1.35406200  | H     | 3.19679000  | -0.23589600 | 1.67672000  |
| H | 0.90709700  | -3.86017900 | 3.24686100  | H     | 4.52679200  | -1.37580400 | 1.40390000  |
| H | -1.40112500 | -3.04169600 | 3.62078500  | H     | 4.84822000  | 0.37056500  | 1.39183400  |
| B | 1.61372300  | -1.02843200 | -0.55572800 | H     | -0.09061200 | -0.57506100 | -1.41445800 |
| P | -1.15702700 | -0.01194000 | -0.33428100 | C     | 0.74331400  | -1.55801100 | -2.15523000 |
| C | -2.91166800 | -0.35144600 | -0.66657800 | H     | 1.66958000  | -2.10196200 | -2.36629500 |
| C | -3.93507500 | 0.11388000  | 0.16771800  | H     | 0.58836400  | -0.90441000 | -3.02416300 |
| C | -3.22953700 | -1.14745100 | -1.77146600 | H     | -0.05168300 | -2.31324200 | -2.12207800 |
| C | -5.25773000 | -0.22478900 | -0.09795900 |       |             |             |             |
| H | -3.69454500 | 0.74829700  | 1.01677800  | P3_TS |             |             |             |
| C | -4.55441300 | -1.48474700 | -2.03305400 | C     | -1.38995100 | 0.70567000  | 0.24610600  |
| H | -2.43824800 | -1.50111200 | -2.42742100 | C     | -0.12493900 | 0.26761700  | 0.10901200  |
| C | -5.56715900 | -1.02474500 | -1.19658500 | C     | -1.90934800 | 1.49406600  | 1.39252200  |
| H | -6.04783400 | 0.13671600  | 0.55213600  | C     | -2.00091400 | 0.86738900  | 2.64114000  |
| H | -4.79539000 | -2.10129800 | -2.89265600 | C     | -2.36361800 | 2.80847100  | 1.24805100  |
| H | -6.60044400 | -1.28510300 | -1.40253400 | C     | -2.54068400 | 1.54535200  | 3.72852600  |
| C | -1.06703400 | 1.66873100  | 0.34525100  | H     | -1.65138600 | -0.15767700 | 2.73764000  |
| C | -1.87988500 | 2.68196100  | -0.17269900 | C     | -2.90200600 | 3.48373300  | 2.34051600  |
| C | -0.13408600 | 1.96500800  | 1.34345400  | H     | -2.28567600 | 3.30188700  | 0.28438200  |
| C | -1.76744300 | 3.98074800  | 0.31357700  | C     | -2.99529700 | 2.85394900  | 3.57902400  |
| H | -2.60444700 | 2.45763400  | -0.95092200 | H     | -2.60959100 | 1.05109900  | 4.69231500  |
| C | -0.02569300 | 3.26650500  | 1.82175600  | H     | -3.24618900 | 4.50633000  | 2.22344200  |
| H | 0.51356300  | 1.17992000  | 1.72021600  | H     | -3.41807700 | 3.38288000  | 4.42718500  |
| C | -0.84110500 | 4.27377300  | 1.31102800  | C     | 0.86931600  | 0.76477400  | 1.11306100  |
| H | -2.40309200 | 4.76265200  | -0.08902800 | C     | 1.33351700  | 2.07590200  | 1.03909200  |
| H | 0.70049300  | 3.49315800  | 2.59588100  | C     | 1.44675900  | -0.05896600 | 2.07012500  |
| H | -0.75383800 | 5.28707300  | 1.68985600  | C     | 2.35145000  | 2.54463500  | 1.85496400  |
| O | 2.96723100  | -1.50549500 | -0.67019400 | C     | 2.45780900  | 0.38829600  | 2.91160700  |
| O | 1.67975400  | 0.41705700  | -0.45739000 | C     | 2.91538500  | 1.69319800  | 2.79799000  |
| C | 2.99297300  | 0.81886800  | -0.83282900 | F     | 1.02783800  | -1.31889400 | 2.20960600  |
| C | 3.32088700  | 2.12015800  | -0.11434500 | F     | 2.98214700  | -0.42194800 | 3.82592800  |
| H | 4.35829500  | 2.41963200  | -0.29806400 | F     | 3.88339000  | 2.13246600  | 3.59407100  |
| H | 2.66156400  | 2.91388500  | -0.47816500 | F     | 2.78772000  | 3.79632500  | 1.74461300  |
| H | 3.16686900  | 2.02054100  | 0.96218000  | F     | 0.82034700  | 2.90837700  | 0.12706500  |
| C | 3.03534300  | 1.03168500  | -2.34821800 | B     | 0.55631500  | -0.66527900 | -1.06811000 |
| H | 2.87941200  | 0.08753300  | -2.87736100 | P     | -2.51587200 | 0.02531300  | -0.99148700 |
| H | 2.23333400  | 1.72138200  | -2.62585900 | C     | -3.26716000 | 1.44258100  | -1.85065700 |
| H | 3.99046900  | 1.45792500  | -2.67053700 | C     | -2.41372100 | 2.46561500  | -2.28640400 |
| C | 3.84017300  | -0.41524200 | -0.38848600 | C     | -4.62731600 | 1.49155300  | -2.16386100 |
| C | 5.13714800  | -0.60698800 | -1.16218200 | C     | -2.92721500 | 3.53337700  | -3.01403000 |
| H | 5.79397000  | 0.26236600  | -1.04926100 | H     | -1.35290800 | 2.43114600  | -2.04443600 |
| H | 5.66401400  | -1.48592300 | -0.78081300 | C     | -5.13332900 | 2.56442400  | -2.89306500 |

|   |             |             |             |      |             |             |             |
|---|-------------|-------------|-------------|------|-------------|-------------|-------------|
| H | -5.29103200 | 0.69803100  | -1.83362100 | P3_P |             |             |             |
| C | -4.28699100 | 3.58484900  | -3.31644200 | C    | -1.43649200 | -0.24511000 | 0.10837000  |
| H | -2.26403200 | 4.32599100  | -3.34456000 | C    | -0.08416800 | -0.18147000 | 0.04470800  |
| H | -6.19194400 | 2.60169000  | -3.12872100 | C    | -2.23260800 | -0.54842900 | 1.34303900  |
| H | -4.68526500 | 4.42005500  | -3.88344700 | C    | -2.93193800 | -1.74963900 | 1.49259900  |
| C | -3.83620400 | -0.85061200 | -0.10434600 | C    | -2.32167100 | 0.42437300  | 2.34483500  |
| C | -4.70449100 | -0.16474900 | 0.75492300  | C    | -3.70696300 | -1.97360900 | 2.62775900  |
| C | -3.94288100 | -2.23680700 | -0.24258300 | H    | -2.84781400 | -2.51801000 | 0.73020200  |
| C | -5.67091900 | -0.86883600 | 1.46466400  | C    | -3.09515400 | 0.19769700  | 3.47750300  |
| H | -4.61880100 | 0.91283400  | 0.87088500  | H    | -1.76922500 | 1.35316600  | 2.22590000  |
| C | -4.91117900 | -2.93592200 | 0.47170400  | C    | -3.79363800 | -1.00022200 | 3.61849000  |
| H | -3.26124800 | -2.76885300 | -0.90073700 | H    | -4.23467700 | -2.91521900 | 2.74093100  |
| C | -5.77321700 | -2.25170000 | 1.32366300  | H    | -3.15475200 | 0.95690300  | 4.25059800  |
| H | -6.34023400 | -0.33735900 | 2.13309000  | H    | -4.39666600 | -1.17736300 | 4.50320000  |
| H | -4.98783700 | -4.01279100 | 0.36561100  | C    | 0.55463900  | -0.65399000 | 1.32743800  |
| H | -6.52718700 | -2.79732600 | 1.88194700  | C    | 1.20325900  | 0.18724700  | 2.22870700  |
| C | 0.64037600  | -2.24356400 | -0.69270400 | C    | 0.45326700  | -1.99395000 | 1.71579800  |
| C | -0.22765300 | -2.89238200 | 0.18148700  | C    | 1.82755900  | -0.28168900 | 3.37716500  |
| C | 1.53547500  | -3.08774800 | -1.34957200 | C    | 1.07567300  | -2.49093500 | 2.85123400  |
| C | -0.20898400 | -4.26450100 | 0.40643300  | C    | 1.78090200  | -1.63296000 | 3.68198700  |
| C | 1.59682500  | -4.45856300 | -1.15186800 | F    | -0.30531900 | -2.85575100 | 1.03167100  |
| C | 0.71299800  | -5.05363300 | -0.26186700 | F    | 0.96457200  | -3.77904600 | 3.16643800  |
| C | 1.97302400  | 0.09901700  | -1.35663000 | F    | 2.36884200  | -2.09612100 | 4.77909600  |
| C | 2.00895600  | 1.31223200  | -2.03509200 | F    | 2.43203700  | 0.56666600  | 4.20376000  |
| C | 3.16899200  | -0.26094200 | -0.74013800 | F    | 1.15682400  | 1.51200600  | 2.07220500  |
| C | 3.14197900  | 2.10993300  | -2.13239600 | B    | 0.91592800  | 0.37688500  | -1.18687100 |
| C | 4.32534200  | 0.50422200  | -0.80711900 | P    | -2.53944700 | 0.04173800  | -1.27898200 |
| C | 4.31316700  | 1.69844200  | -1.51529300 | C    | -4.00707700 | 0.94439100  | -0.74730200 |
| F | -1.07488800 | -4.82289400 | 1.25216200  | C    | -3.99963800 | 2.33810300  | -0.86794100 |
| F | -1.16233900 | -2.21095000 | 0.86688500  | C    | -5.09544500 | 0.28824500  | -0.16197400 |
| F | 2.39500900  | -2.57710700 | -2.24585900 | C    | -5.08762300 | 3.07092900  | -0.40354900 |
| F | 2.47935500  | -5.20617000 | -1.81124100 | H    | -3.14593800 | 2.84891000  | -1.30303300 |
| F | 0.74539300  | -6.36734100 | -0.06253900 | C    | -6.17581400 | 1.03081800  | 0.29834100  |
| F | 3.23306200  | -1.36309500 | 0.02159000  | H    | -5.09370600 | -0.79288500 | -0.05970000 |
| F | 5.43821900  | 0.11198100  | -0.19092600 | C    | -6.17205000 | 2.41925500  | 0.17624000  |
| F | 5.41091800  | 2.44344800  | -1.59198900 | H    | -5.08427800 | 4.15152200  | -0.49611700 |
| F | 3.10657600  | 3.26472600  | -2.79424400 | H    | -7.01954600 | 0.52553600  | 0.75572400  |
| F | 0.88933800  | 1.80597000  | -2.59930000 | H    | -7.01858500 | 2.99496100  | 0.53631600  |
| H | -1.12765800 | -0.62808800 | -1.79911300 | C    | -3.00536700 | -1.53794200 | -2.02169200 |
| C | -0.19085100 | -0.81470500 | -2.77524800 | C    | -2.11727600 | -2.61502300 | -1.92439200 |
| H | 0.80629400  | -1.11858000 | -3.10442300 | C    | -4.20195100 | -1.66013000 | -2.73511700 |
| H | -0.46596300 | 0.08141100  | -3.33469900 | C    | -2.43845500 | -3.81814300 | -2.54582300 |
| H | -0.83853000 | -1.65402800 | -3.05405700 | H    | -1.18995800 | -2.51572000 | -1.36440200 |
|   |             |             |             | C    | -4.51177900 | -2.86861400 | -3.34912100 |



|       |             |             |             |   |             |             |             |
|-------|-------------|-------------|-------------|---|-------------|-------------|-------------|
| H     | -4.88877100 | -0.82141700 | -2.80528900 | C | -1.93847500 | 2.68458800  | -0.64702500 |
| C     | -3.63144600 | -3.94441600 | -3.25351500 | C | -3.33099500 | 2.95094800  | 1.75870700  |
| H     | -1.75332000 | -4.65576000 | -2.47336100 | C | -2.57209500 | 3.87977700  | -0.30049100 |
| H     | -5.44045700 | -2.96980200 | -3.90045900 | C | -3.27804100 | 4.03564900  | 0.88783700  |
| H     | -3.87718900 | -4.88619500 | -3.73342000 | H | -3.86342700 | 3.05006600  | 2.70173900  |
| C     | 2.30996600  | -0.50520700 | -1.27514600 | H | -2.50862200 | 4.71775200  | -0.99085600 |
| C     | 2.30801600  | -1.88860100 | -1.15718300 | C | -2.52747300 | -1.31865900 | -0.25526500 |
| C     | 3.51944300  | 0.00358300  | -1.75209400 | C | -3.52113300 | -1.18811600 | -1.24687400 |
| C     | 3.41328300  | -2.70711700 | -1.35560400 | C | -2.51009800 | -2.46008800 | 0.57786700  |
| C     | 4.65607200  | -0.76468900 | -1.96474600 | C | -4.48448200 | -2.18892300 | -1.37520300 |
| C     | 4.60924200  | -2.13527100 | -1.75383100 | C | -3.49339600 | -3.43390500 | 0.40657000  |
| C     | 1.17272300  | 1.96659700  | -0.77748900 | C | -4.48879900 | -3.31781500 | -0.56121600 |
| C     | 0.24464100  | 2.95781100  | -1.07332500 | H | -5.25115000 | -2.08100600 | -2.13875800 |
| C     | 2.28163200  | 2.45110400  | -0.08242900 | H | -3.47911300 | -4.31028700 | 1.05029800  |
| C     | 0.39518000  | 4.30800900  | -0.78483300 | C | -3.58071900 | -0.01715800 | -2.19422000 |
| C     | 2.49252300  | 3.78830300  | 0.22130200  | H | -3.68563800 | 0.93353700  | -1.66484200 |
| C     | 1.54308700  | 4.73342600  | -0.14002900 | H | -2.67428500 | 0.03942600  | -2.80464900 |
| F     | 3.31958800  | -4.02928400 | -1.19587900 | H | -4.42713000 | -0.12213900 | -2.87537900 |
| F     | 1.15736900  | -2.53422100 | -0.86917600 | C | -5.52025100 | -4.40102300 | -0.73582400 |
| F     | 3.63317000  | 1.29911000  | -2.08232600 | H | -6.38791400 | -4.03801100 | -1.29074700 |
| F     | 5.78407100  | -0.20117900 | -2.39910300 | H | -5.09961200 | -5.24742700 | -1.28840500 |
| F     | 5.68744300  | -2.88937200 | -1.95888600 | H | -5.86282600 | -4.77884700 | 0.23081700  |
| F     | 3.19867100  | 1.60406100  | 0.40545800  | C | -1.47412800 | -2.67072800 | 1.65733600  |
| F     | 3.58371900  | 4.16993800  | 0.88434800  | H | -0.45402400 | -2.67866500 | 1.26117200  |
| F     | 1.71717700  | 6.01958700  | 0.15503900  | H | -1.52359700 | -1.88237200 | 2.41522700  |
| F     | -0.56143300 | 5.18140300  | -1.11439000 | H | -1.64450900 | -3.62491000 | 2.15945200  |
| F     | -0.94094300 | 2.64717900  | -1.66391600 | C | -1.19294000 | 2.66202100  | -1.95953000 |
| H     | -1.97439100 | 0.83959200  | -2.26367900 | H | -0.11183300 | 2.73480300  | -1.80732900 |
| C     | 0.35016400  | 0.24531600  | -2.73192000 | H | -1.38389900 | 1.75454900  | -2.53274100 |
| H     | 1.21304800  | 0.29104000  | -3.40405500 | H | -1.49376400 | 3.51465200  | -2.57124200 |
| H     | -0.32336100 | 1.02818000  | -3.08426700 | C | -3.98098000 | 5.32682100  | 1.21274300  |
| H     | -0.11874300 | -0.73101100 | -2.92382000 | H | -5.02786500 | 5.28710300  | 0.89417900  |
|       |             |             |             | H | -3.97127300 | 5.52193400  | 2.28774500  |
| P4_TS |             |             |             | H | -3.51144000 | 6.17216100  | 0.70488500  |
| C     | -0.04656500 | -0.19512800 | -1.40558400 | C | -2.79519100 | 0.63021600  | 2.48279200  |
| H     | -0.52328200 | -0.31702100 | -2.38173100 | H | -3.30767200 | -0.25277800 | 2.08699500  |
| H     | 0.56759300  | 0.70643500  | -1.42692400 | H | -1.79386300 | 0.31985700  | 2.80103600  |
| C     | 0.80219700  | -1.41140800 | -0.98572700 | H | -3.33773900 | 0.96669300  | 3.36796200  |
| H     | 0.13361500  | -2.27999800 | -0.91445200 | H | 0.11267300  | -0.42175500 | 0.97499300  |
| H     | 1.48547500  | -1.64483600 | -1.80986800 | H | 1.82238100  | -2.36737200 | 0.89587000  |
| P     | -1.22685000 | -0.04656300 | -0.01513800 | C | 4.24682200  | -0.95507700 | 0.98936500  |
| B     | 1.71861300  | -1.28768600 | 0.36964000  | C | 3.20738700  | -0.66691600 | 0.10263900  |
| C     | -2.01718800 | 1.58951600  | 0.23960700  | C | 3.59629000  | 0.10835400  | -0.98546100 |
| C     | -2.71183000 | 1.73931300  | 1.46328700  | C | 4.89396500  | 0.56356400  | -1.19463300 |

|      |             |             |             |       |             |             |             |
|------|-------------|-------------|-------------|-------|-------------|-------------|-------------|
| C    | 5.88391400  | 0.24457500  | -0.28062000 | H     | -5.07318900 | -5.47416600 | -0.14149200 |
| C    | 5.55523800  | -0.52160200 | 0.82910300  | C     | -1.51433600 | -2.62957200 | 1.79692600  |
| F    | 4.00148200  | -1.68316800 | 2.09162400  | H     | -0.46391000 | -2.51177400 | 1.50947500  |
| F    | 6.49602600  | -0.83505400 | 1.72073800  | H     | -1.72869400 | -1.88791400 | 2.57488700  |
| F    | 7.13314600  | 0.66885000  | -0.46071100 | H     | -1.62395400 | -3.61431900 | 2.25332300  |
| F    | 5.19053800  | 1.30146800  | -2.26662800 | C     | -1.31732100 | 2.62773000  | -1.91312400 |
| F    | 2.70884000  | 0.47052800  | -1.93238200 | H     | -0.25050200 | 2.67730700  | -1.67932500 |
| C    | 1.18977300  | -0.26079200 | 1.85222500  | H     | -1.48280400 | 1.73007400  | -2.51064900 |
| H    | 2.10912000  | -0.60604300 | 2.32708800  | H     | -1.55741200 | 3.48884500  | -2.53855800 |
| H    | 0.41996300  | -0.50887700 | 2.59523400  | C     | -4.38201100 | 5.26834200  | 1.01336100  |
| H    | 1.24820400  | 0.82861700  | 1.75389700  | H     | -3.69222600 | 6.01862600  | 1.41255700  |
| P4_P |             |             |             | H     | -4.81256500 | 5.67337100  | 0.09439000  |
| C    | 0.07166800  | -0.06563700 | -1.02164100 | H     | -5.18409800 | 5.13092100  | 1.74108600  |
| H    | -0.26563300 | -0.06265600 | -2.06343200 | C     | -3.14833600 | 0.63499700  | 2.46833300  |
| H    | 0.64758700  | 0.84773500  | -0.84742300 | H     | -3.48432700 | -0.31545200 | 2.04190600  |
| C    | 0.87588200  | -1.32137500 | -0.62212600 | H     | -2.18473400 | 0.46479700  | 2.96317200  |
| H    | 0.17464200  | -2.15897800 | -0.49889000 | H     | -3.86387500 | 0.92544400  | 3.23867100  |
| H    | 1.46426900  | -1.59473500 | -1.50340100 | H     | -0.88257500 | -0.25072700 | 1.32595700  |
| P    | -1.38432400 | 0.00179300  | 0.05653500  | H     | 2.08020300  | -2.29356500 | 1.11182900  |
| B    | 1.88947000  | -1.16753800 | 0.68334600  | C     | 4.46701300  | -0.80326100 | 1.04359500  |
| C    | -2.25789300 | 1.58632500  | 0.25567100  | C     | 3.36493100  | -0.58798300 | 0.21466300  |
| C    | -3.03899500 | 1.72099700  | 1.42553100  | C     | 3.66666600  | 0.13620800  | -0.93178700 |
| C    | -2.16060000 | 2.65584600  | -0.66093300 | C     | 4.93724600  | 0.59721900  | -1.26191300 |
| C    | -3.72456500 | 2.91420800  | 1.64365400  | C     | 5.99431300  | 0.34300200  | -0.40494200 |
| C    | -2.87115400 | 3.82454400  | -0.39237000 | C     | 5.75400800  | -0.36341300 | 0.76538300  |
| C    | -3.65554100 | 3.97723700  | 0.74856600  | F     | 4.31350100  | -1.46460200 | 2.20169600  |
| H    | -4.32795900 | 3.01207600  | 2.54239200  | F     | 6.76281700  | -0.60772800 | 1.60807300  |
| H    | -2.80308000 | 4.64633800  | -1.10099500 | F     | 7.22324600  | 0.77706900  | -0.69593300 |
| C    | -2.51069200 | -1.39167300 | -0.24178600 | F     | 5.14498000  | 1.28387900  | -2.39190600 |
| C    | -3.40646200 | -1.36642800 | -1.33144100 | F     | 2.69895200  | 0.45671100  | -1.82694100 |
| C    | -2.46435100 | -2.50512000 | 0.62676500  | C     | 1.39006100  | -0.20364800 | 1.92848000  |
| C    | -4.26389600 | -2.44451100 | -1.51936900 | H     | 2.22033600  | -0.07999200 | 2.63174300  |
| C    | -3.34886100 | -3.55946900 | 0.38789100  | H     | 0.56908900  | -0.62087500 | 2.53355700  |
| C    | -4.25493900 | -3.54874100 | -0.66727000 | H     | 1.09452900  | 0.81919300  | 1.63449000  |
| H    | -4.95392200 | -2.42549200 | -2.35951700 | P5_TS |             |             |             |
| H    | -3.31926500 | -4.42006700 | 1.05070300  | P     | -1.49079600 | -0.94219600 | -0.15117500 |
| C    | -3.44588300 | -0.22873800 | -2.31954800 | B     | 1.59699100  | -0.70119000 | 0.05508800  |
| H    | -3.65375000 | 0.73061400  | -1.83699100 | C     | -0.43570000 | -1.74249000 | -1.42764400 |
| H    | -2.49331500 | -0.14367000 | -2.85322900 | C     | 0.99478900  | -1.17939700 | -1.40447100 |
| H    | -4.21998000 | -0.40138600 | -3.06882900 | C     | -3.00854900 | -1.98489700 | -0.09111900 |
| C    | -5.19679400 | -4.69943700 | -0.90028800 | C     | -5.12982000 | -2.70288900 | -1.00138800 |
| H    | -6.23678700 | -4.36110700 | -0.87798800 | C     | -5.31886800 | -3.60095500 | 0.04553400  |
| H    | -5.02099300 | -5.15151900 | -1.88076600 | C     | -4.33022200 | -3.68245900 | 1.02104300  |

|   |             |             |             |      |             |             |             |
|---|-------------|-------------|-------------|------|-------------|-------------|-------------|
| C | -3.18025800 | -2.89420800 | 0.97122300  | H    | -1.91945100 | -2.10034500 | 2.54391200  |
| C | -2.08099100 | 0.78344000  | -0.42956100 | H    | -1.22203700 | -3.47675200 | 1.67593600  |
| C | -1.86087600 | 1.58280700  | -1.56777400 | H    | -2.52393200 | -3.73733000 | 2.83619700  |
| C | -2.36553400 | 2.88749900  | -1.58999700 | H    | -1.56723000 | 1.56467100  | -3.68973400 |
| C | -3.06944600 | 3.43725000  | -0.52707100 | H    | -0.07061200 | 1.59743300  | -2.75919600 |
| C | -3.27338100 | 2.63636400  | 0.59472900  | H    | -0.97972200 | 0.09810100  | -2.91148100 |
| C | -2.79185500 | 1.33238800  | 0.66996200  | H    | -2.78417300 | 5.51831200  | -0.12533400 |
| C | 3.22374200  | -0.90671100 | 0.04160600  | H    | -4.46512000 | 4.98951100  | 0.01646100  |
| C | 3.77846400  | -2.15083000 | -0.26587200 | H    | -3.72979700 | 5.19769600  | -1.58404100 |
| C | 5.14019800  | -2.40186800 | -0.35073800 | H    | -3.48360200 | 1.23363600  | 2.69655200  |
| C | 6.03529500  | -1.36803000 | -0.11824500 | H    | -3.65943200 | -0.29439900 | 1.82182500  |
| C | 5.54309700  | -0.11345700 | 0.19926600  | H    | -2.06478300 | 0.23856800  | 2.38444400  |
| C | 4.16859500  | 0.09080500  | 0.27945900  | C    | -3.99767400 | -1.89413300 | -1.09539100 |
| C | 1.13802400  | 0.83109800  | 0.41940100  | C    | -3.91119400 | -0.95541200 | -2.27380300 |
| C | 1.33362200  | 1.84259000  | -0.52115100 | H    | -4.18101200 | 0.06645900  | -1.99026700 |
| C | 0.80264800  | 3.11725700  | -0.41857700 | H    | -2.90645000 | -0.91617900 | -2.69944500 |
| C | 0.05195800  | 3.45223200  | 0.69961000  | H    | -4.59428800 | -1.28255400 | -3.06017200 |
| C | -0.11024700 | 2.51376100  | 1.70209200  | H    | -2.18063700 | 3.49329800  | -2.47495200 |
| C | 0.44719500  | 1.24883300  | 1.55129700  | H    | -0.06718300 | -1.23714700 | 0.86942500  |
| C | -6.54439500 | -4.47450000 | 0.09933300  | C    | 1.10003000  | -1.82596800 | 1.40573900  |
| C | -2.15522500 | -3.05740300 | 2.06611900  | H    | 0.26574400  | -1.97526800 | 2.10501800  |
| C | -1.07989800 | 1.17249300  | -2.79330500 | H    | 1.35859200  | -2.81022000 | 1.01574900  |
| C | -3.54575300 | 4.86398600  | -0.56031500 | H    | 1.86541100  | -1.45307600 | 2.08841000  |
| C | -3.01436600 | 0.57922800  | 1.96021300  |      |             |             |             |
| F | 2.98078500  | -3.21135500 | -0.50078300 | P5_P |             |             |             |
| F | 5.59141200  | -3.61991100 | -0.65053200 | P    | -1.72590500 | -0.85703900 | -0.13810300 |
| F | 7.34602800  | -1.58091800 | -0.19807400 | B    | 1.68268100  | -0.97330000 | 0.34365700  |
| F | 6.38815000  | 0.89067200  | 0.43076400  | C    | -0.49185200 | -1.88875700 | -1.01304800 |
| F | 3.80292900  | 1.33708300  | 0.60944800  | C    | 0.97384900  | -1.44448200 | -1.08371700 |
| F | 2.05615500  | 1.59478000  | -1.62832200 | C    | -3.26721800 | -1.82268700 | -0.10835500 |
| F | 0.95254800  | 3.99850100  | -1.40797900 | C    | -5.33690000 | -2.51658500 | -1.12715700 |
| F | -0.52084900 | 4.65094000  | 0.79405400  | C    | -5.63252800 | -3.33152300 | -0.03869000 |
| F | -0.86442400 | 2.79607100  | 2.76634700  | C    | -4.71741200 | -3.38780100 | 1.01199400  |
| F | 0.18998900  | 0.39358200  | 2.56608300  | C    | -3.53347200 | -2.65504200 | 1.00223300  |
| H | -0.87768200 | -1.81330500 | -2.42466400 | C    | -2.08418400 | 0.88322000  | -0.51735300 |
| H | -0.42432300 | -2.76883700 | -1.03140400 | C    | -1.69582800 | 1.54577100  | -1.69256100 |
| H | 1.05868300  | -0.33160200 | -2.08910600 | C    | -2.03908200 | 2.89233200  | -1.84303400 |
| H | 1.63938700  | -1.95095000 | -1.83295300 | C    | -2.73604500 | 3.59463100  | -0.86862000 |
| H | -5.88890100 | -2.62663100 | -1.77694900 | C    | -3.11733200 | 2.91230400  | 0.28835900  |
| H | -4.45312900 | -4.37894800 | 1.84694400  | C    | -2.80619000 | 1.57332800  | 0.49179000  |
| H | -3.80634100 | 3.04472300  | 1.44997100  | C    | 3.32476100  | -1.00406800 | 0.11815100  |
| H | -6.68218700 | -4.90431800 | 1.09366600  | C    | 3.94635400  | -2.18904800 | -0.28150700 |
| H | -7.44300100 | -3.90850400 | -0.15892000 | C    | 5.31278400  | -2.33654300 | -0.48008800 |
| H | -6.46075500 | -5.30069500 | -0.61395800 | C    | 6.15138400  | -1.25451500 | -0.26508100 |

|   |             |             |             |       |             |             |             |
|---|-------------|-------------|-------------|-------|-------------|-------------|-------------|
| C | 5.59631700  | -0.05552000 | 0.14823500  | H     | -2.32767800 | 0.67053700  | 2.39966800  |
| C | 4.22109800  | 0.04090200  | 0.33592800  | C     | -4.16781000 | -1.75810200 | -1.18805700 |
| C | 1.14908400  | 0.57749800  | 0.62896000  | C     | -3.93399000 | -0.90090500 | -2.40792900 |
| C | 1.36684500  | 1.57076400  | -0.32933200 | H     | -4.12193200 | 0.15590800  | -2.19613100 |
| C | 0.86066900  | 2.85782100  | -0.26366400 | H     | -2.90958700 | -0.98184100 | -2.78407400 |
| C | 0.10496400  | 3.23245800  | 0.83765800  | H     | -4.60074000 | -1.21074900 | -3.21444900 |
| C | -0.11529900 | 2.30766500  | 1.84085500  | H     | -1.72168000 | 3.40668300  | -2.74715400 |
| C | 0.39751100  | 1.01867900  | 1.71307100  | H     | -1.30118000 | -0.82845500 | 1.18718400  |
| C | -6.88954800 | -4.15896700 | -0.00228200 | C     | 1.34654800  | -2.01104800 | 1.56043100  |
| C | -2.59149000 | -2.79139700 | 2.17508000  | H     | 0.28189900  | -2.09817500 | 1.81257400  |
| C | -0.88763500 | 0.93136800  | -2.80674000 | H     | 1.69604800  | -3.01566700 | 1.29777500  |
| C | -3.01606400 | 5.06380200  | -1.01929700 | H     | 1.84614200  | -1.72674600 | 2.49251900  |
| C | -3.20648600 | 0.93999700  | 1.80362700  |       |             |             |             |
| F | 3.22118100  | -3.30624700 | -0.49993500 | P6_TS |             |             |             |
| F | 5.82349000  | -3.50880700 | -0.86664600 | P     | 1.77723200  | -0.66937500 | 0.39595200  |
| F | 7.46728200  | -1.36828500 | -0.44742300 | C     | 1.29961000  | -0.94476600 | 2.16663000  |
| F | 6.38621200  | 0.99770800  | 0.37150700  | H     | 2.19397800  | -1.08551100 | 2.77690700  |
| F | 3.80164800  | 1.24569700  | 0.76365500  | H     | 0.77031000  | -0.06554700 | 2.53092900  |
| F | 2.10585000  | 1.29923600  | -1.42118600 | C     | 0.35962000  | -2.15694300 | 2.27514500  |
| F | 1.03974600  | 3.71940600  | -1.26854100 | H     | 0.74823600  | -2.98415500 | 1.66569300  |
| F | -0.43973800 | 4.44946000  | 0.90403800  | H     | 0.41555000  | -2.51778400 | 3.30842000  |
| F | -0.90116200 | 2.63100000  | 2.87505900  | C     | -1.11172000 | -1.84535300 | 1.93964300  |
| F | 0.02587000  | 0.17115800  | 2.70255500  | H     | -1.50628200 | -1.20642100 | 2.73247400  |
| H | -0.93687600 | -2.14111900 | -1.98391700 | H     | -1.66424500 | -2.79149200 | 2.02823700  |
| H | -0.57240600 | -2.80018100 | -0.40149000 | B     | -1.49582400 | -1.21435900 | 0.48271700  |
| H | 1.08776100  | -0.67516800 | -1.85112400 | C     | 2.10274300  | 1.10626100  | -0.01166000 |
| H | 1.49624800  | -2.32744200 | -1.46364800 | C     | 2.18563100  | 2.18320600  | 0.90321700  |
| H | -6.03389100 | -2.46777400 | -1.96000200 | C     | 2.03958600  | 2.08323000  | 2.40536500  |
| H | -4.92913000 | -4.02613300 | 1.86636800  | H     | 2.47738200  | 2.96967800  | 2.86876400  |
| H | -3.65107200 | 3.44701100  | 1.06963500  | H     | 2.53139300  | 1.21183300  | 2.83044800  |
| H | -7.35013400 | -4.12943900 | 0.98837500  | H     | 0.98713200  | 2.05570800  | 2.70293800  |
| H | -7.61956500 | -3.80504700 | -0.73274900 | C     | 2.37458700  | 3.47621800  | 0.40643700  |
| H | -6.66614700 | -5.20605700 | -0.22972300 | H     | 2.42742800  | 4.29677200  | 1.11818500  |
| H | -2.44895900 | -1.84325600 | 2.70598800  | C     | 2.47255200  | 3.75682400  | -0.95175000 |
| H | -1.60139000 | -3.14488400 | 1.86963000  | C     | 2.60392000  | 5.17107900  | -1.44688100 |
| H | -2.98869200 | -3.51158100 | 2.89159100  | H     | 3.15082800  | 5.21257400  | -2.39154200 |
| H | -1.31704900 | 1.20668400  | -3.77384300 | H     | 3.11946000  | 5.80104300  | -0.71837000 |
| H | 0.13659600  | 1.31832800  | -2.77295900 | H     | 1.60952900  | 5.59639100  | -1.61382500 |
| H | -0.82635800 | -0.15366800 | -2.76113500 | C     | 2.39315400  | 2.68765500  | -1.83745500 |
| H | -3.96160900 | 5.33935300  | -0.54670900 | H     | 2.45800400  | 2.87399000  | -2.90648300 |
| H | -3.04957500 | 5.35898600  | -2.07000200 | C     | 2.20738700  | 1.37857100  | -1.39708200 |
| H | -2.21805800 | 5.63261000  | -0.53228500 | C     | 2.08188200  | 0.30150500  | -2.44624100 |
| H | -3.78599000 | 1.64987500  | 2.39480600  | H     | 1.10471600  | -0.19176000 | -2.39026600 |
| H | -3.81803500 | 0.04326000  | 1.66162900  | H     | 2.85782900  | -0.46309200 | -2.33884000 |

|   |             |             |             |      |             |             |             |
|---|-------------|-------------|-------------|------|-------------|-------------|-------------|
| H | 2.17314300  | 0.73473000  | -3.44359000 | C    | -0.66263200 | -2.36886700 | -0.65786800 |
| C | 3.38154200  | -1.58212600 | 0.15950900  | H    | -1.57789300 | -2.94846300 | -0.51182700 |
| C | 4.54550800  | -1.23232100 | 0.89720800  | H    | 0.09191600  | -3.09320100 | -0.34463300 |
| C | 4.62069300  | -0.07423700 | 1.86031300  | H    | -0.59845100 | -2.19042600 | -1.72995600 |
| H | 5.65379700  | 0.07463100  | 2.17917400  |      |             |             |             |
| H | 4.03106200  | -0.25083600 | 2.76392900  | P6_P |             |             |             |
| H | 4.27553600  | 0.85521400  | 1.40434700  | P    | -1.98111800 | -0.65551500 | -0.34321900 |
| C | 5.71346800  | -1.96913300 | 0.72887900  | C    | -1.11627700 | -1.38516600 | -1.76973800 |
| H | 6.59268700  | -1.68571300 | 1.30300200  | H    | -1.88629700 | -1.62611700 | -2.50875100 |
| C | 5.80070600  | -3.04424900 | -0.15358300 | H    | -0.44992900 | -0.63723300 | -2.20082900 |
| C | 7.08228300  | -3.81979100 | -0.29825000 | C    | -0.28681000 | -2.62838500 | -1.36497100 |
| H | 7.91337800  | -3.15670200 | -0.55497800 | H    | -0.66060600 | -3.06781400 | -0.42995700 |
| H | 6.99971500  | -4.58142300 | -1.07611700 | H    | -0.46590000 | -3.38665700 | -2.13481300 |
| H | 7.34106000  | -4.31930800 | 0.64026400  | C    | 1.20914700  | -2.30007800 | -1.26567900 |
| C | 4.67200700  | -3.35265400 | -0.89493800 | H    | 1.50260400  | -1.84120700 | -2.21517100 |
| H | 4.71400500  | -4.16942800 | -1.61192400 | H    | 1.74058600  | -3.25957400 | -1.23434500 |
| C | 3.47045200  | -2.64696600 | -0.76286800 | B    | 1.72122900  | -1.46080900 | 0.05447500  |
| C | 2.34918400  | -3.11967500 | -1.65647500 | C    | -2.23201600 | 1.14277300  | -0.33892900 |
| H | 1.62929600  | -2.34140700 | -1.89606500 | C    | -2.08764900 | 1.96565500  | -1.47849300 |
| H | 1.80788600  | -3.95200500 | -1.19506400 | C    | -1.70064300 | 1.48816400  | -2.85816300 |
| H | 2.76347000  | -3.49096300 | -2.59678600 | H    | -1.97793900 | 2.24556500  | -3.59330900 |
| C | -1.16881600 | 0.37065100  | 0.18297600  | H    | -2.18941100 | 0.55748300  | -3.14615600 |
| C | -1.10774900 | 0.84036300  | -1.12932100 | H    | -0.61712900 | 1.34768700  | -2.93455200 |
| F | -1.24311200 | -0.01970100 | -2.15646200 | C    | -2.26934900 | 3.33972000  | -1.32629200 |
| C | -0.87770500 | 2.16217500  | -1.47653300 | H    | -2.14635200 | 3.97523700  | -2.19954700 |
| F | -0.73750100 | 2.51970300  | -2.75256300 | C    | -2.57338100 | 3.92523900  | -0.10040500 |
| C | -0.75743500 | 3.11193900  | -0.47349300 | C    | -2.68969000 | 5.41770800  | 0.03124200  |
| F | -0.50204200 | 4.38379700  | -0.77523800 | H    | -3.31549600 | 5.69557900  | 0.88169900  |
| C | -0.87688700 | 2.71352300  | 0.84635800  | H    | -3.10793000 | 5.86507900  | -0.87322100 |
| F | -0.71223700 | 3.60768500  | 1.82385300  | H    | -1.69506900 | 5.84563300  | 0.18918700  |
| C | -1.07925400 | 1.37059700  | 1.14678300  | C    | -2.71301600 | 3.09331700  | 1.00633800  |
| F | -1.13011100 | 1.08155200  | 2.46127000  | H    | -2.93556800 | 3.52789300  | 1.97705900  |
| C | -3.12116600 | -1.29519400 | 0.18835900  | C    | -2.54896800 | 1.71364400  | 0.91629000  |
| C | -3.98826300 | -0.75511400 | 1.14030600  | C    | -2.65527500 | 0.90529700  | 2.18578200  |
| F | -3.49406900 | -0.20590400 | 2.26207800  | H    | -1.67558900 | 0.51723800  | 2.48751800  |
| C | -5.36814400 | -0.70813900 | 1.00330000  | H    | -3.35141800 | 0.06693100  | 2.08704300  |
| F | -6.13151800 | -0.18718800 | 1.96384400  | H    | -3.01213200 | 1.53756900  | 2.99959700  |
| C | -5.95235000 | -1.19930700 | -0.15513900 | C    | -3.52502300 | -1.56680700 | -0.02909400 |
| F | -7.27341000 | -1.16436000 | -0.31191800 | C    | -4.63827300 | -1.36806300 | -0.87517500 |
| C | -5.13846400 | -1.71431800 | -1.14975300 | C    | -4.61469500 | -0.43836900 | -2.06315200 |
| F | -5.67932900 | -2.17620200 | -2.27759000 | H    | -5.59402900 | -0.41754200 | -2.54350200 |
| C | -3.75855700 | -1.73851000 | -0.96936700 | H    | -3.89528200 | -0.77106200 | -2.81832800 |
| F | -3.06151300 | -2.23027100 | -2.00858200 | H    | -4.35706300 | 0.58596800  | -1.78108100 |
| H | 0.28812500  | -1.44331100 | -0.23516600 | C    | -5.81393700 | -2.06618000 | -0.61334700 |

|       |             |             |             |   |             |             |             |
|-------|-------------|-------------|-------------|---|-------------|-------------|-------------|
| H     | -6.67046800 | -1.90793600 | -1.26387200 | C | -0.95064700 | 0.08851300  | 2.73872300  |
| C     | -5.92302100 | -2.95496200 | 0.45353100  | H | -1.71014900 | 0.72810800  | 3.19489800  |
| C     | -7.19682600 | -3.71874100 | 0.69519100  | C | -0.79408600 | 0.25081800  | 1.21275600  |
| H     | -7.21021700 | -4.63553800 | 0.09706900  | H | -0.58426400 | 1.30638200  | 1.03052600  |
| H     | -8.07157800 | -3.12803500 | 0.41428700  | C | 0.48588300  | -0.58899700 | 0.90531800  |
| H     | -7.29381300 | -4.00557600 | 1.74433800  | H | 0.15168700  | -1.59153900 | 0.61497900  |
| C     | -4.81319700 | -3.13458000 | 1.27340300  | C | 1.12289300  | -0.73582900 | 2.32265500  |
| H     | -4.88145800 | -3.82196200 | 2.11245400  | H | 2.21395400  | -0.79208000 | 2.32278600  |
| C     | -3.60838600 | -2.46407900 | 1.06016700  | C | 0.41534800  | -1.92272000 | 2.99977900  |
| C     | -2.47068800 | -2.75850500 | 2.00953100  | H | 0.86520700  | -2.13805100 | 3.97436300  |
| H     | -2.05572000 | -1.85890300 | 2.47429100  | H | 0.47025300  | -2.83128300 | 2.39606000  |
| H     | -1.64679100 | -3.27471600 | 1.50935100  | C | -1.04313100 | -1.39493700 | 3.16481700  |
| H     | -2.82059300 | -3.40744600 | 2.81343500  | H | -1.75842000 | -1.96030500 | 2.56374300  |
| C     | 1.16424900  | 0.12828000  | 0.12560800  | H | -1.37190400 | -1.46004000 | 4.20584000  |
| C     | 0.75109900  | 0.76782800  | 1.29494000  | C | 0.50775800  | 0.43004300  | 3.12125100  |
| F     | 0.53118300  | 0.06644400  | 2.42487600  | H | 0.69522100  | 0.34409100  | 4.19638100  |
| C     | 0.47418300  | 2.12558800  | 1.40008000  | H | 0.81578600  | 1.42420700  | 2.78187100  |
| F     | 0.01351500  | 2.63956300  | 2.54539600  | C | -2.74178700 | -1.77483600 | 0.13965700  |
| C     | 0.60097800  | 2.93640600  | 0.28511200  | C | -3.86031100 | -1.79715100 | 1.00334300  |
| F     | 0.30652900  | 4.23697500  | 0.35024200  | C | -4.49409100 | -3.01015700 | 1.26003200  |
| C     | 0.97650700  | 2.35821200  | -0.91608200 | H | -5.35181300 | -3.02150700 | 1.92877500  |
| F     | 1.00676700  | 3.10200000  | -2.02767700 | C | -4.05669200 | -4.20675000 | 0.69383500  |
| C     | 1.24442100  | 0.99549700  | -0.96424700 | C | -2.95992900 | -4.16427700 | -0.15992700 |
| F     | 1.57555900  | 0.52431000  | -2.18615400 | H | -2.60952700 | -5.08573700 | -0.61822200 |
| C     | 3.36962800  | -1.24956400 | 0.03240300  | C | -2.29161800 | -2.97312300 | -0.45423200 |
| C     | 4.25421000  | -1.64861700 | -0.96632000 | C | -4.38364200 | -0.55847400 | 1.68454400  |
| F     | 3.82460400  | -2.27107900 | -2.07793300 | H | -5.10860900 | -0.82759100 | 2.45491300  |
| C     | 5.63156400  | -1.45088200 | -0.90920300 | H | -4.86977300 | 0.11848400  | 0.97597000  |
| F     | 6.41887700  | -1.86861700 | -1.90483300 | H | -3.57380600 | -0.00295500 | 2.16637200  |
| C     | 6.19049200  | -0.81653400 | 0.18685300  | C | -4.74325000 | -5.50681600 | 1.01891600  |
| F     | 7.50755000  | -0.61886400 | 0.25995000  | H | -4.43091600 | -5.87128300 | 2.00276500  |
| C     | 5.35725500  | -0.38835400 | 1.20955700  | H | -4.50046400 | -6.27813300 | 0.28517400  |
| F     | 5.87546900  | 0.22947700  | 2.27477500  | H | -5.82891300 | -5.38377800 | 1.04413800  |
| C     | 3.99144300  | -0.61086300 | 1.10787000  | C | -1.12632500 | -3.04265600 | -1.41395100 |
| F     | 3.25484700  | -0.15197000 | 2.13820200  | H | -1.09769900 | -4.02310800 | -1.89330200 |
| H     | -1.17346000 | -0.93032100 | 0.76183600  | H | -0.16581600 | -2.89688900 | -0.90964600 |
| C     | 1.33887700  | -2.33867100 | 1.38379900  | H | -1.20593900 | -2.28665600 | -2.19854500 |
| H     | 1.82796200  | -2.00291200 | 2.30022300  | C | -3.10436100 | 1.02239200  | -0.78605300 |
| H     | 1.63703000  | -3.38182900 | 1.21376600  | C | -3.72628400 | 0.70671200  | -2.01815900 |
| H     | 0.26399600  | -2.35842700 | 1.60815600  | C | -4.68007600 | 1.57344200  | -2.54879200 |
|       |             |             |             | H | -5.15365000 | 1.31348000  | -3.49249000 |
| P7_TS |             |             |             | C | -5.02949400 | 2.76202600  | -1.91600800 |
| P     | -1.86088500 | -0.20357800 | -0.21455000 | C | -4.37569200 | 3.07913900  | -0.72968500 |
| B     | 1.41610700  | 0.00070600  | -0.29129800 | H | -4.61256300 | 4.01570700  | -0.23030000 |

|      |             |             |             |   |             |             |             |
|------|-------------|-------------|-------------|---|-------------|-------------|-------------|
| C    | -3.41812000 | 2.24380500  | -0.15231100 | C | -0.66150000 | 1.63858700  | 2.64881500  |
| C    | -3.37979800 | -0.52846300 | -2.81491700 | H | -1.40856800 | 2.40315700  | 2.87893300  |
| H    | -3.65812700 | -1.45058700 | -2.29586000 | C | -0.50513400 | 1.30158100  | 1.14882900  |
| H    | -2.30364900 | -0.57441300 | -3.01685700 | H | -0.26284500 | 2.21401100  | 0.59848800  |
| H    | -3.89612700 | -0.51333700 | -3.77622600 | C | 0.74829400  | 0.36381200  | 1.11169700  |
| C    | -6.08612600 | 3.66923700  | -2.48818700 | H | 0.37446800  | -0.66231500 | 1.22999300  |
| H    | -6.14765500 | 3.56883900  | -3.57416200 | C | 1.38867000  | 0.69373700  | 2.50016700  |
| H    | -5.88021200 | 4.71530300  | -2.25008000 | H | 2.47719900  | 0.61675400  | 2.50884400  |
| H    | -7.07072400 | 3.42398500  | -2.07666600 | C | 0.68158100  | -0.20476500 | 3.52951900  |
| C    | -2.75756100 | 2.73720800  | 1.10992100  | H | 1.13068800  | -0.09598100 | 4.52210600  |
| H    | -3.34206800 | 3.54965000  | 1.54547500  | H | 0.73051400  | -1.26148700 | 3.25221600  |
| H    | -1.75946400 | 3.13065400  | 0.89029400  | C | -0.77384000 | 0.36005700  | 3.51575900  |
| H    | -2.65702900 | 1.95492700  | 1.86170800  | H | -1.49700300 | -0.35962200 | 3.12511000  |
| C    | 1.79763200  | 1.54911300  | 0.05726400  | H | -1.10643900 | 0.62928000  | 4.52219600  |
| F    | 3.79764100  | 0.92986800  | 1.17237000  | C | 0.79753100  | 2.05660900  | 2.90776000  |
| C    | 2.92154400  | 1.87972300  | 0.81184400  | H | 0.97827300  | 2.28920100  | 3.96225900  |
| F    | 4.29643200  | 3.41682100  | 1.96963200  | H | 1.11783000  | 2.89687800  | 2.29424300  |
| C    | 3.20241800  | 3.16669300  | 1.25297500  | C | -3.03608400 | -0.48475500 | 1.09470800  |
| F    | 2.57054200  | 5.43679100  | 1.37635700  | C | -4.07875500 | 0.11824300  | 1.82950300  |
| C    | 2.32660200  | 4.20057700  | 0.95064900  | C | -4.94941800 | -0.69532500 | 2.54916800  |
| F    | 0.31137200  | 4.89095600  | -0.06429100 | H | -5.74916100 | -0.22787800 | 3.11820300  |
| C    | 1.18913600  | 3.92409700  | 0.20847900  | C | -4.81945100 | -2.08206700 | 2.56767900  |
| F    | -0.18851700 | 2.43118800  | -0.90958900 | C | -3.78363100 | -2.65393000 | 1.83450500  |
| C    | 0.96213500  | 2.62386600  | -0.22382300 | H | -3.66372800 | -3.73408800 | 1.84084400  |
| C    | 2.70637200  | -0.93606400 | -0.64599100 | C | -2.88365000 | -1.89034600 | 1.09137400  |
| F    | 1.90180500  | -2.92460300 | 0.40637200  | C | -4.27871500 | 1.61034100  | 1.89102400  |
| C    | 2.85317200  | -2.27418200 | -0.29011800 | H | -5.14908200 | 1.85052600  | 2.50351200  |
| F    | 4.02692000  | -4.32621700 | -0.24358300 | H | -4.43261400 | 2.04448200  | 0.89953800  |
| C    | 3.96080900  | -3.04953500 | -0.62085900 | H | -3.41525900 | 2.10253800  | 2.34808300  |
| F    | 6.06113600  | -3.21407000 | -1.67761800 | C | -5.78704100 | -2.93839600 | 3.33896200  |
| C    | 4.99588000  | -2.48930700 | -1.34946700 | H | -5.32191100 | -3.87448000 | 3.65503500  |
| F    | 5.88205900  | -0.60512200 | -2.44987300 | H | -6.65340700 | -3.19052900 | 2.71888700  |
| C    | 4.90080300  | -1.16115600 | -1.74135800 | H | -6.15497900 | -2.41768200 | 4.22581600  |
| F    | 3.75072300  | 0.84384700  | -1.81421500 | C | -1.81002300 | -2.62177200 | 0.32341500  |
| C    | 3.77714200  | -0.43072900 | -1.38730900 | H | -1.84536400 | -3.68728900 | 0.55544100  |
| H    | -0.35377100 | -0.13872200 | -1.14434000 | H | -0.80313400 | -2.26812600 | 0.56102400  |
| C    | 0.66986300  | 0.03725100  | -2.05020000 | H | -1.94666900 | -2.51988900 | -0.75882400 |
| H    | 0.71298600  | -0.94667800 | -2.52042700 | C | -2.71339900 | 1.61196900  | -1.04117000 |
| H    | 1.57765500  | 0.58381400  | -2.31879100 | C | -3.30494000 | 0.94217800  | -2.14148400 |
| H    | -0.11219800 | 0.64106700  | -2.52889700 | C | -3.95561500 | 1.69712200  | -3.11137100 |
| P7_P |             |             |             | H | -4.41104000 | 1.18161000  | -3.95331600 |
| P    | -1.85608700 | 0.54584300  | 0.16493700  | C | -4.03646600 | 3.08674200  | -3.03901000 |
| B    | 1.59360700  | 0.37012300  | -0.35978500 | C | -3.44264900 | 3.71958000  | -1.95381800 |
|      |             |             |             | H | -3.49220900 | 4.80294400  | -1.87912400 |

|       |             |             |             |   |             |             |             |
|-------|-------------|-------------|-------------|---|-------------|-------------|-------------|
| C     | -2.77301000 | 3.01611500  | -0.95021600 | H | -0.16360600 | -2.11413600 | 0.93801500  |
| C     | -3.24413800 | -0.55458700 | -2.33228000 | P | 1.98016600  | -1.58569500 | -0.06631800 |
| H     | -3.59631100 | -1.09924100 | -1.45098100 | B | -0.39317500 | -0.24853900 | -0.38481800 |
| H     | -2.22348900 | -0.88065000 | -2.56465600 | C | 3.44064200  | -0.80884800 | 0.84700800  |
| H     | -3.87565700 | -0.84677000 | -3.17235300 | C | 3.06377800  | 0.60232900  | 1.31806600  |
| C     | -4.74665900 | 3.86741600  | -4.11177900 | H | 2.23524100  | 0.59724800  | 2.03160900  |
| H     | -4.26164400 | 3.71974500  | -5.08100300 | H | 3.93468100  | 1.03413700  | 1.82389300  |
| H     | -4.74825500 | 4.93638200  | -3.89135000 | H | 2.80471100  | 1.25937800  | 0.48587200  |
| H     | -5.78423700 | 3.53588900  | -4.21150000 | C | 4.60483000  | -0.67940100 | -0.14746300 |
| C     | -2.13889000 | 3.83833400  | 0.14539400  | H | 5.44855800  | -0.18841700 | 0.35035300  |
| H     | -2.65324300 | 4.79745200  | 0.23138900  | H | 4.95372000  | -1.64622900 | -0.51633500 |
| H     | -1.08978400 | 4.04817700  | -0.09014400 | H | 4.31552900  | -0.06866500 | -1.00801000 |
| H     | -2.17106300 | 3.35611600  | 1.12187400  | C | 3.87006400  | -1.61552300 | 2.07729200  |
| C     | 3.20990800  | 0.65886300  | -0.14249800 | H | 4.27483500  | -2.59522300 | 1.81597800  |
| F     | 4.08239900  | -1.33146900 | -1.13668700 | H | 4.66036900  | -1.06503400 | 2.60071500  |
| C     | 4.27867000  | -0.14586700 | -0.53534000 | H | 3.04000300  | -1.75476400 | 2.77695800  |
| F     | 6.58422500  | -0.63224100 | -0.76420700 | C | 2.11490400  | -3.46721600 | -0.11285800 |
| C     | 5.61690600  | 0.19673900  | -0.36484400 | C | 1.02813700  | -3.93445300 | -1.09678300 |
| F     | 7.22679300  | 1.75387700  | 0.38384000  | H | 0.02385200  | -3.66119400 | -0.76259800 |
| C     | 5.95041500  | 1.40922900  | 0.21402200  | H | 1.18642900  | -3.52077200 | -2.09769200 |
| F     | 5.22230200  | 3.44363900  | 1.15768000  | H | 1.06787000  | -5.02670300 | -1.17377500 |
| C     | 4.93091600  | 2.26223600  | 0.60636000  | C | 3.47546800  | -3.89799600 | -0.67465900 |
| F     | 2.68619400  | 2.77290500  | 0.80145800  | H | 3.69112700  | -3.40678900 | -1.62935800 |
| C     | 3.61353900  | 1.87228800  | 0.41191400  | H | 4.29827100  | -3.69287600 | 0.01425700  |
| C     | 1.34111700  | -1.16783300 | -0.93814000 | H | 3.45946100  | -4.97922700 | -0.85227200 |
| F     | 2.47314900  | -2.01718500 | 0.94982100  | C | 1.85767800  | -4.14435400 | 1.23953600  |
| C     | 1.78070700  | -2.25407000 | -0.17704000 | H | 1.81870200  | -5.22940500 | 1.08776900  |
| F     | 2.00139900  | -4.56943700 | 0.28390300  | H | 2.64082800  | -3.94188500 | 1.97050900  |
| C     | 1.54224300  | -3.58279200 | -0.48787800 | H | 0.89948800  | -3.83869300 | 1.66869400  |
| F     | 0.52779500  | -5.15629300 | -1.93274200 | C | -2.01687000 | -0.29346200 | -0.21222800 |
| C     | 0.79351400  | -3.88779700 | -1.62078800 | C | -2.68060400 | -1.51709700 | -0.11991100 |
| F     | -0.45897500 | -3.11443900 | -3.46316700 | C | -2.86056800 | 0.81465800  | -0.13108100 |
| C     | 0.31497400  | -2.85322500 | -2.40387300 | C | -4.04788800 | -1.65768600 | 0.06647300  |
| F     | 0.03938800  | -0.60758400 | -2.86194300 | C | -4.23513700 | 0.72367400  | 0.06286500  |
| C     | 0.60356800  | -1.53437700 | -2.05478300 | C | -4.83561100 | -0.52060000 | 0.16420200  |
| H     | -1.19196200 | -0.35974000 | -0.66169600 | F | -1.99439700 | -2.67420900 | -0.23109600 |
| C     | 1.07020200  | 1.51536500  | -1.41059600 | F | -4.60474700 | -2.86591100 | 0.14122900  |
| H     | -0.00136500 | 1.49213100  | -1.65447000 | F | -4.97977900 | 1.82493600  | 0.13982900  |
| H     | 1.58528300  | 1.42250700  | -2.37246300 | F | -2.38673900 | 2.06250600  | -0.24605300 |
| H     | 1.28893500  | 2.52029800  | -1.03087400 | F | -6.14851000 | -0.62357400 | 0.34306200  |
|       |             |             |             | C | 0.25710500  | 1.24626800  | -0.36699400 |
| P8_TS |             |             |             | C | 1.04216400  | 1.84793300  | -1.34411400 |
| C     | 0.37876600  | -1.18908800 | 0.73211800  | C | 0.10275800  | 2.00330100  | 0.79352500  |
| H     | 0.49375200  | -0.66082500 | 1.68155300  | C | 1.62626300  | 3.10490100  | -1.19515300 |



|      |             |             |             |       |             |             |             |
|------|-------------|-------------|-------------|-------|-------------|-------------|-------------|
| C    | 0.66238700  | 3.25421100  | 0.99029700  | H     | 2.47485600  | -2.58213500 | 2.12776700  |
| C    | 1.43770600  | 3.81183600  | -0.01972900 | C     | -1.50448300 | -1.06701100 | -0.31835800 |
| F    | -0.62815600 | 1.50587500  | 1.80365400  | C     | -1.62142600 | -2.34018400 | 0.23017700  |
| F    | 0.47089600  | 3.92192600  | 2.12657500  | C     | -2.72217500 | -0.54985200 | -0.77091600 |
| F    | 1.99021900  | 5.01012900  | 0.14126300  | C     | -2.82052700 | -3.03099500 | 0.37279700  |
| F    | 2.36751900  | 3.62375700  | -2.17339500 | C     | -3.94483700 | -1.19697800 | -0.65346100 |
| F    | 1.31423800  | 1.22949300  | -2.50789400 | C     | -3.99825500 | -2.45275100 | -0.06715400 |
| H    | 1.01049100  | -1.00868700 | -1.41081700 | F     | -0.53737800 | -3.03306500 | 0.66431900  |
| C    | -0.19631800 | -0.94130500 | -2.08579200 | F     | -2.83832600 | -4.24809100 | 0.92093100  |
| H    | 0.57858000  | -1.04611500 | -2.86030000 | F     | -5.06251200 | -0.62974600 | -1.10762100 |
| H    | -0.75410300 | -1.87641900 | -2.06071500 | F     | -2.76023800 | 0.64123100  | -1.39030100 |
| H    | -0.79820700 | -0.12743000 | -2.49770500 | F     | -5.15763000 | -3.09635400 | 0.05525800  |
| P8_P |             |             |             | C     | -0.44071400 | 1.37756700  | -0.16318000 |
| C    | 1.13262900  | -0.68100700 | 0.43710200  | C     | -0.33894200 | 2.50119100  | -0.97538800 |
| H    | 1.26888600  | 0.01820300  | 1.26907100  | C     | -0.82788100 | 1.65184500  | 1.14643300  |
| H    | 0.89819800  | -1.64308400 | 0.88825100  | C     | -0.58666900 | 3.79671300  | -0.53407400 |
| P    | 2.74386800  | -0.88219400 | -0.31590300 | C     | -1.09055100 | 2.92482500  | 1.63558500  |
| B    | -0.12985000 | -0.18125800 | -0.59741700 | C     | -0.97326800 | 4.01089700  | 0.78024700  |
| C    | 3.79644700  | 0.63660500  | -0.14836800 | F     | -0.93655300 | 0.63946800  | 2.02826200  |
| C    | 2.86698900  | 1.84631500  | -0.34589500 | F     | -1.44984200 | 3.11353200  | 2.90649400  |
| H    | 2.14628400  | 1.94785700  | 0.46892200  | F     | -1.21307300 | 5.24522500  | 1.22011000  |
| H    | 3.48446200  | 2.75041500  | -0.36696600 | F     | -0.45256100 | 4.83532900  | -1.36116700 |
| H    | 2.30737500  | 1.79800700  | -1.28602900 | F     | 0.06334600  | 2.39454900  | -2.25429000 |
| C    | 4.87170200  | 0.65617100  | -1.24405300 | H     | 2.62577900  | -1.04382700 | -1.70315200 |
| H    | 5.43950600  | 1.58785500  | -1.15516700 | C     | 0.20950800  | -0.38410400 | -2.17817300 |
| H    | 5.57853500  | -0.17122100 | -1.16153600 | H     | 1.05915700  | 0.19821900  | -2.55675200 |
| H    | 4.42291000  | 0.63608000  | -2.24180400 | H     | 0.41044800  | -1.44341100 | -2.39859500 |
| C    | 4.43422100  | 0.70141200  | 1.24444200  | H     | -0.64822300 | -0.09168100 | -2.79109300 |
| H    | 5.19052000  | -0.07533900 | 1.38807100  | P9_TS |             |             |             |
| H    | 4.92799800  | 1.67173500  | 1.35836400  | C     | 0.13640900  | -0.54202400 | -0.79802400 |
| H    | 3.68673400  | 0.61573100  | 2.03987900  | H     | 0.13689800  | 0.14431900  | -1.65006000 |
| C    | 3.51464300  | -2.49026700 | 0.20177000  | H     | 0.03726400  | -1.55184500 | -1.20410900 |
| C    | 2.62953900  | -3.57525800 | -0.44115500 | B     | -1.08092800 | -0.11562300 | 0.25591100  |
| H    | 1.57969000  | -3.49157800 | -0.14699400 | C     | -1.21673000 | 1.49242500  | 0.29704600  |
| H    | 2.68686900  | -3.54169400 | -1.53360500 | C     | -0.92187700 | 2.30131200  | 1.40041900  |
| H    | 2.99174700  | -4.55585700 | -0.11593700 | C     | -1.59779100 | 2.15822000  | -0.88275100 |
| C    | 4.94589800  | -2.63034900 | -0.32710800 | C     | -0.97021800 | 3.69498100  | 1.33166400  |
| H    | 5.00111700  | -2.46783200 | -1.40838300 | C     | -1.65669600 | 3.54477900  | -0.96562700 |
| H    | 5.63853500  | -1.94462600 | 0.16812200  | C     | -1.33048600 | 4.32325100  | 0.14570900  |
| H    | 5.29253100  | -3.64966800 | -0.12792300 | C     | -2.45609000 | -0.91216400 | -0.04208800 |
| C    | 3.49036800  | -2.64179100 | 1.72837500  | C     | -3.70912000 | -0.28471500 | -0.05000700 |
| H    | 3.89056600  | -3.62791300 | 1.98510400  | C     | -2.44669500 | -2.29690700 | -0.27028200 |
| H    | 4.10633500  | -1.89169700 | 2.23019300  | C     | -4.88610400 | -0.99411700 | -0.28617000 |

|   |             |             |             |      |             |             |             |
|---|-------------|-------------|-------------|------|-------------|-------------|-------------|
| C | -3.61249000 | -3.01981200 | -0.50159500 |      |             |             |             |
| C | -4.84232100 | -2.36574800 | -0.51474100 | P9_P |             |             |             |
| P | 1.67159400  | -0.37009100 | 0.17401700  | C    | 0.02795600  | -0.75709600 | -0.53382600 |
| C | 2.75019800  | 0.99825000  | -0.54667500 | H    | -0.13613800 | -0.22843700 | -1.47914400 |
| C | 4.12617500  | 1.00779300  | 0.12971500  | H    | -0.00229400 | -1.82976500 | -0.74641000 |
| H | 4.73234600  | 0.14194100  | -0.14873100 | B    | -1.18033700 | -0.26041500 | 0.58241600  |
| H | 4.66837200  | 1.90436900  | -0.19102800 | C    | -1.09543900 | 1.37139000  | 0.58443800  |
| H | 4.04191800  | 1.04189400  | 1.22073900  | C    | -0.53155000 | 2.10520300  | 1.63912300  |
| C | 2.91895300  | 0.87737000  | -2.06705700 | C    | -1.51830700 | 2.12287900  | -0.52799100 |
| H | 3.43693500  | -0.03533800 | -2.36687000 | C    | -0.36814400 | 3.49199200  | 1.58491500  |
| H | 1.95622100  | 0.91377300  | -2.58272100 | C    | -1.37058800 | 3.50459600  | -0.59800600 |
| H | 3.51338600  | 1.72882700  | -2.41961700 | C    | -0.78151800 | 4.19797700  | 0.45999900  |
| C | 2.04997700  | 2.33085000  | -0.23921600 | C    | -2.60176000 | -0.82099800 | 0.00723900  |
| H | 1.06519000  | 2.40281800  | -0.70948100 | C    | -3.78269500 | -0.06475300 | 0.07369500  |
| H | 1.91790200  | 2.48201800  | 0.83554100  | C    | -2.73974200 | -2.12824100 | -0.48503000 |
| H | 2.67253600  | 3.14542400  | -0.62754600 | C    | -5.01440300 | -0.56756000 | -0.34134600 |
| C | 2.57172500  | -2.02501900 | 0.23414700  | C    | -3.96129500 | -2.64696200 | -0.90703600 |
| C | 3.51898600  | -2.03327100 | 1.44491600  | C    | -5.10958800 | -1.86234900 | -0.84235300 |
| H | 3.97446300  | -3.02591200 | 1.53700300  | P    | 1.67641300  | -0.36561200 | 0.03369200  |
| H | 4.32729700  | -1.30620300 | 1.35585800  | C    | 2.59880300  | 0.74159400  | -1.14650600 |
| H | 2.97284600  | -1.82618200 | 2.37058800  | C    | 4.00930700  | 1.05129000  | -0.63177500 |
| C | 3.33814300  | -2.35190000 | -1.05058700 | H    | 4.66238300  | 0.17524700  | -0.64389700 |
| H | 4.19222100  | -1.68679000 | -1.20075300 | H    | 4.45886400  | 1.80539800  | -1.28620000 |
| H | 3.72498400  | -3.37611400 | -0.98950500 | H    | 3.99008400  | 1.46373400  | 0.38238600  |
| H | 2.68899900  | -2.29002400 | -1.93009600 | C    | 2.66103400  | 0.13048400  | -2.55280100 |
| C | 1.52020100  | -3.12201100 | 0.46653600  | H    | 3.31104800  | -0.74462600 | -2.60561500 |
| H | 0.89574200  | -2.91406300 | 1.33989000  | H    | 1.66850100  | -0.15135900 | -2.91532100 |
| H | 0.87050500  | -3.26285600 | -0.40019600 | H    | 3.06187800  | 0.88466200  | -3.23801300 |
| H | 2.04117900  | -4.06900400 | 0.64642100  | C    | 1.79461000  | 2.05204100  | -1.21096600 |
| H | -3.76521400 | 0.78616700  | 0.13015100  | H    | 0.80861200  | 1.90625400  | -1.65533300 |
| H | -5.83964600 | -0.47357000 | -0.28938500 | H    | 1.64432500  | 2.50832200  | -0.22674700 |
| H | -5.75692800 | -2.92108300 | -0.69963500 | H    | 2.34842100  | 2.75860800  | -1.83862100 |
| H | -3.56424500 | -4.09156500 | -0.67269800 | C    | 2.63885500  | -1.86482000 | 0.59410300  |
| H | -1.49751500 | -2.83180400 | -0.25579300 | C    | 3.66126000  | -1.44917900 | 1.66248400  |
| H | -0.62743500 | 1.84193000  | 2.34138000  | H    | 4.19935400  | -2.34224000 | 1.99766700  |
| H | -0.72175800 | 4.28821200  | 2.20724000  | H    | 4.40076600  | -0.73617300 | 1.29365000  |
| H | -1.36704700 | 5.40668000  | 0.08628300  | H    | 3.16391300  | -1.01407300 | 2.53467300  |
| H | -1.95524600 | 4.02226200  | -1.89468300 | C    | 3.33775300  | -2.53407800 | -0.59655600 |
| H | -1.85771400 | 1.56608400  | -1.75949000 | H    | 4.15090600  | -1.92492100 | -0.99855700 |
| H | 0.52074600  | -0.26314600 | 1.39995100  | H    | 3.77061900  | -3.48118800 | -0.25820600 |
| C | -0.71201500 | -0.67346300 | 2.00897300  | H    | 2.63506300  | -2.76015300 | -1.40538100 |
| H | -0.79255300 | -1.76197200 | 2.00769000  | C    | 1.67225100  | -2.87752300 | 1.22928400  |
| H | -0.06628900 | -0.39969500 | 2.85952200  | H    | 1.14185900  | -2.45969400 | 2.08589100  |
| H | -1.67843700 | -0.24855900 | 2.29849700  | H    | 0.93067000  | -3.25165000 | 0.51945700  |

|        |             |             |             |   |             |             |             |
|--------|-------------|-------------|-------------|---|-------------|-------------|-------------|
| H      | 2.26478600  | -3.73144100 | 1.57480300  | C | -5.82643700 | 4.64471500  | 0.63996600  |
| H      | -3.73544500 | 0.94972700  | 0.46282800  | H | -5.27112200 | 5.52711600  | 0.96365000  |
| H      | -5.90295600 | 0.05470200  | -0.27485700 | H | -6.41417900 | 4.91782800  | -0.24162700 |
| H      | -6.06557200 | -2.25719700 | -1.17336000 | H | -6.53157600 | 4.37474900  | 1.43138600  |
| H      | -4.01900200 | -3.66454400 | -1.28454900 | C | -1.17581800 | 2.90247000  | 0.18932100  |
| H      | -1.86693200 | -2.77972700 | -0.52908400 | H | -0.96998200 | 3.86206400  | -0.29356200 |
| H      | -0.21987300 | 1.58008500  | 2.54045500  | H | -0.86781700 | 2.99532200  | 1.23703200  |
| H      | 0.07472600  | 4.02006800  | 2.42543200  | H | -0.53174200 | 2.16474500  | -0.28319500 |
| H      | -0.66160200 | 5.27623800  | 0.41165800  | C | -2.67939500 | -1.57186700 | 0.18309000  |
| H      | -1.71386800 | 4.04573500  | -1.47592200 | C | -2.58516200 | -2.84577900 | -0.41389800 |
| H      | -1.98529600 | 1.59952700  | -1.36238200 | C | -3.07664900 | -3.95717200 | 0.27287400  |
| H      | 1.59725600  | 0.43337500  | 1.18819400  | H | -2.99927400 | -4.93303400 | -0.20161800 |
| C      | -0.94217400 | -0.89163200 | 2.07090500  | C | -3.62354000 | -3.86240500 | 1.54643500  |
| H      | -1.05789400 | -1.98260400 | 2.07601200  | C | -3.61432100 | -2.61200700 | 2.15883500  |
| H      | 0.03138200  | -0.66406200 | 2.53709900  | H | -3.97286700 | -2.52091400 | 3.18179600  |
| H      | -1.70080100 | -0.49708700 | 2.75801000  | C | -3.14155900 | -1.46784500 | 1.51804500  |
|        |             |             |             | C | -1.92333100 | -3.12006900 | -1.74610300 |
| P10_TS |             |             |             | H | -1.40416100 | -4.07943000 | -1.69195600 |
| P      | -2.06551000 | -0.07060600 | -0.69120700 | H | -2.65043800 | -3.18270800 | -2.56280800 |
| B      | 1.44429800  | 0.11321700  | -0.39987500 | H | -1.17209600 | -2.37312700 | -2.00285900 |
| C      | -2.41378700 | -0.16455700 | -2.52705200 | C | -4.18095000 | -5.06914000 | 2.25280800  |
| H      | -3.07657900 | 0.68924500  | -2.69239300 | H | -3.75539900 | -5.99278300 | 1.85460700  |
| H      | -2.98819900 | -1.06218200 | -2.75871900 | H | -3.97476000 | -5.02939000 | 3.32516000  |
| C      | -1.17939900 | -0.01719900 | -3.43315100 | H | -5.26749100 | -5.12233800 | 2.12794300  |
| H      | -1.52398600 | 0.44201200  | -4.36568100 | C | -3.14524300 | -0.18903000 | 2.32815600  |
| H      | -0.78347800 | -1.00142700 | -3.70628800 | H | -3.14626600 | -0.43919500 | 3.39109700  |
| C      | -0.06285800 | 0.82414200  | -2.79879700 | H | -2.26728300 | 0.43197400  | 2.13598700  |
| H      | 0.49851400  | 1.32617500  | -3.59055500 | H | -4.02698300 | 0.42691400  | 2.12556500  |
| H      | -0.52299300 | 1.63985200  | -2.23125100 | C | 2.23086700  | 1.49293300  | 0.01059500  |
| C      | 0.91730900  | -0.03884600 | -1.95738800 | C | 2.13884900  | 2.70388700  | -0.66824000 |
| H      | 0.56647400  | -1.07790300 | -2.02748600 | F | 1.39319400  | 2.82014800  | -1.77921400 |
| H      | 1.87008600  | -0.06356400 | -2.50451600 | C | 2.77010600  | 3.87771500  | -0.26681500 |
| C      | -3.18509800 | 1.33016700  | -0.25245800 | F | 2.61139700  | 5.00199100  | -0.96721900 |
| C      | -4.59222600 | 1.17177500  | -0.34125700 | C | 3.56497500  | 3.87431200  | 0.86571100  |
| C      | -5.41303500 | 2.25389900  | -0.04262100 | F | 4.17721600  | 4.98493500  | 1.26749100  |
| H      | -6.49138100 | 2.12361500  | -0.10734400 | C | 3.71003800  | 2.69186600  | 1.57717300  |
| C      | -4.90089400 | 3.49808600  | 0.33113800  | F | 4.47873600  | 2.66151800  | 2.66567200  |
| C      | -3.52328400 | 3.63988900  | 0.38251400  | C | 3.05522900  | 1.55164500  | 1.13896600  |
| H      | -3.09586000 | 4.60415300  | 0.64913400  | C | 2.35664500  | -1.24701200 | -0.23931800 |
| C      | -2.65031500 | 2.58341800  | 0.09397600  | C | 3.74515200  | -1.29685400 | -0.31656100 |
| C      | -5.27369300 | -0.12686400 | -0.70882100 | F | 4.46377500  | -0.17413500 | -0.45817600 |
| H      | -4.76419100 | -0.66519500 | -1.50959000 | C | 4.47511900  | -2.47984800 | -0.26895300 |
| H      | -5.32353700 | -0.80614600 | 0.14844500  | F | 5.80586100  | -2.45929300 | -0.34232400 |
| H      | -6.29500100 | 0.07469300  | -1.03831000 | C | 3.81206700  | -3.69242800 | -0.15938400 |

|       |             |             |             |   |             |             |             |
|-------|-------------|-------------|-------------|---|-------------|-------------|-------------|
| F     | 4.49537800  | -4.83453400 | -0.12192300 | H | 2.83637100  | 2.26600400  | -1.07542000 |
| C     | 2.42623800  | -3.70073400 | -0.10342500 | H | 2.66629200  | 2.56430300  | 0.64629200  |
| F     | 1.76436300  | -4.85712000 | -0.02245600 | H | 3.72561700  | 3.58138100  | -0.32017200 |
| C     | 1.74430100  | -2.49356700 | -0.14794100 | C | 2.51228000  | -1.95787600 | -0.32425500 |
| F     | 0.39504000  | -2.57902100 | -0.12446500 | C | 2.37135100  | -3.21935300 | 0.27990600  |
| F     | 3.26800300  | 0.44834700  | 1.87790000  | C | 2.03581800  | -4.30807900 | -0.52715400 |
| H     | -0.41507900 | 0.03612300  | -0.09812100 | H | 1.91924400  | -5.28205600 | -0.05734300 |
| C     | 0.34917500  | -0.03570300 | 1.10482500  | C | 1.83680000  | -4.18532800 | -1.89636900 |
| H     | 1.25710400  | -0.18517700 | 1.69093900  | C | 2.00562900  | -2.92684000 | -2.47567300 |
| H     | -0.11159700 | 0.87269500  | 1.49901200  | H | 1.86119500  | -2.81135000 | -3.54671200 |
| H     | -0.26682200 | -0.90926600 | 1.34256500  | C | 2.33161900  | -1.80650100 | -1.72277000 |
|       |             |             |             | C | 2.55700300  | -3.51351800 | 1.74851100  |
| P10_P |             |             |             | H | 3.32575500  | -4.28170600 | 1.87723100  |
| P     | 2.79099300  | -0.40929300 | 0.57217600  | H | 2.85176600  | -2.65150000 | 2.34043200  |
| B     | -1.96864200 | 0.01404400  | 0.44258800  | H | 1.62607300  | -3.90225600 | 2.17059300  |
| C     | 2.13387500  | -0.28330600 | 2.27058600  | C | 1.42125500  | -5.36348100 | -2.73377800 |
| H     | 2.12809700  | 0.79993000  | 2.44534000  | H | 0.33872900  | -5.34474400 | -2.89438100 |
| H     | 2.85562800  | -0.70721400 | 2.97319700  | H | 1.90117900  | -5.33920700 | -3.71501900 |
| C     | 0.70642900  | -0.87359300 | 2.37435300  | H | 1.67141600  | -6.30771000 | -2.24621500 |
| H     | 0.72792400  | -1.70094900 | 3.09009800  | C | 2.43911100  | -0.47696300 | -2.43063200 |
| H     | 0.41773400  | -1.32003100 | 1.41909400  | H | 2.47469700  | -0.63278700 | -3.50949400 |
| C     | -0.38699500 | 0.13449100  | 2.77782400  | H | 1.55816100  | 0.14313300  | -2.21942000 |
| H     | -0.50875600 | 0.09216000  | 3.86803600  | H | 3.33763200  | 0.08229300  | -2.14892400 |
| H     | -0.06240300 | 1.15301400  | 2.55505800  | C | -1.84799200 | 1.60679700  | -0.07145400 |
| C     | -1.72262400 | -0.16728000 | 2.08301400  | C | -0.64088200 | 2.29437200  | 0.01185000  |
| H     | -1.96829200 | -1.21855200 | 2.30777100  | F | 0.46237200  | 1.70039400  | 0.55992700  |
| H     | -2.49286900 | 0.41603300  | 2.60044300  | C | -0.39893100 | 3.58112600  | -0.44523400 |
| C     | 4.45614300  | 0.28561900  | 0.42875700  | F | 0.81770300  | 4.13594700  | -0.31174900 |
| C     | 5.59887900  | -0.49803400 | 0.67712700  | C | -1.42312500 | 4.28147900  | -1.05809600 |
| C     | 6.85337000  | 0.09506600  | 0.55149800  | F | -1.22994800 | 5.52163900  | -1.50890300 |
| H     | 7.73771100  | -0.50736300 | 0.74211900  | C | -2.64894400 | 3.65220600  | -1.20123500 |
| C     | 7.00214500  | 1.43368700  | 0.19861900  | F | -3.64705800 | 4.29417700  | -1.81114900 |
| C     | 5.85327500  | 2.19141400  | -0.02684000 | C | -2.82922000 | 2.35354500  | -0.73065000 |
| H     | 5.95453700  | 3.24076700  | -0.29259400 | C | -3.52384100 | -0.55047600 | 0.29165000  |
| C     | 4.57361300  | 1.65277100  | 0.08097200  | C | -4.57705600 | 0.09931200  | 0.93823600  |
| C     | 5.51708800  | -1.94537100 | 1.09105600  | F | -4.35663100 | 1.28030300  | 1.54623300  |
| H     | 4.95100900  | -2.06284900 | 2.02095300  | C | -5.88044700 | -0.36755900 | 0.99104700  |
| H     | 5.03602500  | -2.56240600 | 0.32672300  | F | -6.83455400 | 0.32057600  | 1.62601900  |
| H     | 6.51645100  | -2.34514800 | 1.26941300  | C | -6.19299200 | -1.57128200 | 0.37420200  |
| C     | 8.36403900  | 2.06254200  | 0.07754100  | F | -7.43824700 | -2.05110600 | 0.41426300  |
| H     | 8.49013100  | 2.53077900  | -0.90246800 | C | -5.19155800 | -2.26387000 | -0.28093300 |
| H     | 8.49616400  | 2.84327600  | 0.83238200  | F | -5.47050100 | -3.42757300 | -0.88030000 |
| H     | 9.15671600  | 1.32409800  | 0.20974900  | C | -3.89646300 | -1.74940700 | -0.30578400 |
| C     | 3.38860500  | 2.55453900  | -0.17370700 | F | -3.00714400 | -2.51866900 | -0.96348200 |

|        |             |             |             |   |             |             |             |
|--------|-------------|-------------|-------------|---|-------------|-------------|-------------|
| F      | -4.04048800 | 1.84558200  | -0.99284400 | H | 5.59775800  | -0.64197700 | 1.65934900  |
| H      | 1.98877300  | 0.48027900  | -0.12698500 | H | 4.75805000  | 0.45297000  | 0.55138800  |
| C      | -0.93494100 | -0.81192600 | -0.53627000 | C | 2.27584800  | 1.05003000  | -0.10493500 |
| H      | -1.26528700 | -0.79209000 | -1.58176400 | C | 2.64325900  | 1.52976000  | -1.38728900 |
| H      | 0.06288500  | -0.35390000 | -0.52047000 | C | 2.99397400  | 2.86589100  | -1.54470100 |
| H      | -0.81144100 | -1.86945200 | -0.27074800 | H | 3.25014000  | 3.22748500  | -2.53769500 |
| P11_TS |             |             |             | C | 2.98206800  | 3.76029800  | -0.47483600 |
| P      | 1.59992900  | -0.65818300 | -0.11550900 | C | 2.68711500  | 3.25651300  | 0.78534800  |
| B      | -1.46094200 | -0.51315300 | -0.22796000 | H | 2.70133900  | 3.93020600  | 1.64024500  |
| C      | 0.60103800  | -1.08848400 | 1.39716600  | C | 2.33774700  | 1.91855200  | 1.00307300  |
| H      | 0.44102000  | -0.16825000 | 1.96227400  | C | 2.64125100  | 0.64106400  | -2.61005100 |
| C      | 1.27629400  | -2.12278000 | 2.30351200  | H | 3.06908200  | 1.17304600  | -3.46177100 |
| H      | 2.25469600  | -1.76233400 | 2.64697800  | H | 3.22170000  | -0.27423300 | -2.45652400 |
| H      | 1.47478700  | -3.03462700 | 1.72360000  | H | 1.61872100  | 0.35601000  | -2.87756000 |
| C      | 0.37678200  | -2.45987000 | 3.49238600  | C | 3.21778200  | 5.22933900  | -0.69435100 |
| H      | 0.24575000  | -1.56067900 | 4.11053800  | H | 2.28665700  | 5.69862400  | -1.02881600 |
| H      | 0.85816000  | -3.21437900 | 4.12355500  | H | 3.53159900  | 5.72647000  | 0.22614000  |
| C      | -0.98854500 | -2.94567400 | 3.00959600  | H | 3.97603500  | 5.40306300  | -1.46178400 |
| H      | -0.85619500 | -3.88081800 | 2.44770200  | C | 2.07125400  | 1.54303200  | 2.44609500  |
| H      | -1.63246500 | -3.17879000 | 3.86431400  | H | 1.04625300  | 1.78804100  | 2.74824600  |
| C      | -1.66396100 | -1.90874000 | 2.10891100  | H | 2.23587900  | 0.48831900  | 2.66122100  |
| H      | -2.62236000 | -2.30723400 | 1.76750300  | H | 2.73890100  | 2.11872400  | 3.09217600  |
| H      | -1.88876400 | -1.01405600 | 2.69657800  | C | -3.08262800 | -0.72165100 | -0.34414900 |
| C      | -0.79074600 | -1.54143900 | 0.89142600  | C | -4.03248900 | 0.29850300  | -0.33423800 |
| H      | -0.64551600 | -2.49477600 | 0.35835100  | F | -3.68188300 | 1.58576100  | -0.20223300 |
| C      | 3.01160300  | -1.84434800 | -0.28564800 | C | -5.40194900 | 0.07750900  | -0.45948500 |
| C      | 2.79755700  | -3.00286200 | -1.06807600 | F | -6.25217400 | 1.10321700  | -0.43888600 |
| C      | 3.82609300  | -3.92709200 | -1.23539000 | C | -5.88106500 | -1.21209600 | -0.61334800 |
| H      | 3.63705600  | -4.81612100 | -1.83262100 | F | -7.18531800 | -1.43934600 | -0.73978800 |
| C      | 5.08241200  | -3.74277800 | -0.66555000 | C | -4.97861200 | -2.26621200 | -0.63284800 |
| C      | 5.28256900  | -2.59827200 | 0.09589200  | F | -5.41591300 | -3.51684200 | -0.77809300 |
| H      | 6.25346000  | -2.43542500 | 0.55778900  | C | -3.62479600 | -1.99915100 | -0.49975900 |
| C      | 4.28098300  | -1.64550400 | 0.30285200  | F | -2.81576200 | -3.07671000 | -0.51718600 |
| C      | 1.49190300  | -3.28526200 | -1.76774000 | C | -1.04201600 | 1.07760100  | -0.10035400 |
| H      | 1.50912200  | -4.27999100 | -2.21672000 | C | -1.11829300 | 1.74055200  | 1.12263700  |
| H      | 0.63593200  | -3.24144200 | -1.08995300 | F | -1.50868400 | 1.07617800  | 2.22530600  |
| H      | 1.31748100  | -2.56144100 | -2.56993100 | C | -0.78200000 | 3.07002900  | 1.32766600  |
| C      | 6.18709000  | -4.74141400 | -0.88683200 | F | -0.80282500 | 3.59075800  | 2.55686700  |
| H      | 6.97235200  | -4.63669600 | -0.13520800 | C | -0.33698000 | 3.82953700  | 0.25939000  |
| H      | 5.80636000  | -5.76511200 | -0.84748800 | F | 0.07273100  | 5.08362200  | 0.43748800  |
| H      | 6.64503800  | -4.59894500 | -1.87100800 | C | -0.26409100 | 3.23958100  | -0.98877800 |
| C      | 4.64954000  | -0.45445600 | 1.15193100  | F | 0.19284200  | 3.94394700  | -2.02534800 |
| H      | 3.89939000  | -0.24866400 | 1.91614500  | C | -0.61571700 | 1.90422500  | -1.14141000 |
|        |             |             |             | F | -0.45178300 | 1.43650800  | -2.39432900 |

|       |             |             |             |   |             |             |             |
|-------|-------------|-------------|-------------|---|-------------|-------------|-------------|
| H     | 0.13364200  | -0.79764500 | -1.15239300 | H | 4.80415300  | 0.25813800  | 0.90624300  |
| C     | -0.99833600 | -1.09742700 | -1.93783100 | C | 2.35664600  | 1.02909000  | 0.15535100  |
| H     | -1.29534900 | -2.14472100 | -1.91099700 | C | 2.86407200  | 1.62741300  | -1.02214800 |
| H     | -0.15196600 | -1.02375800 | -2.63470300 | C | 3.35537400  | 2.92921900  | -0.95731700 |
| H     | -1.75065100 | -0.48518600 | -2.43236700 | H | 3.72703300  | 3.39087100  | -1.86830200 |
| P11_P |             |             |             | C | 3.36219900  | 3.65603700  | 0.23024000  |
| P     | 1.69337200  | -0.65193400 | -0.05567800 | C | 2.88133400  | 3.03571600  | 1.37982900  |
| B     | -1.65643700 | -0.61416500 | -0.57955400 | H | 2.88280900  | 3.58580800  | 2.31756500  |
| C     | 0.43210800  | -1.22006800 | 1.17070600  | C | 2.37315700  | 1.73660600  | 1.37595400  |
| H     | 0.23336600  | -0.33349300 | 1.77470700  | C | 2.85437100  | 0.94196900  | -2.36830900 |
| C     | 1.07068800  | -2.29873100 | 2.06777400  | H | 3.46784100  | 1.50461500  | -3.07324500 |
| H     | 2.06115400  | -1.99115800 | 2.42993500  | H | 3.25170000  | -0.07719700 | -2.32341600 |
| H     | 1.23379500  | -3.20530500 | 1.46965800  | H | 1.83887500  | 0.90213800  | -2.77892400 |
| C     | 0.15164800  | -2.61344600 | 3.24433200  | C | 3.82767000  | 5.08501400  | 0.25965100  |
| H     | 0.05195100  | -1.71534100 | 3.87037100  | H | 4.23227600  | 5.35279900  | 1.23814900  |
| H     | 0.60184200  | -3.39211200 | 3.86887600  | H | 4.59173700  | 5.27066300  | -0.49832600 |
| C     | -1.22063600 | -3.03525400 | 2.73285000  | H | 2.97920700  | 5.74489000  | 0.05385400  |
| H     | -1.12114200 | -3.98262400 | 2.18539000  | C | 1.85448700  | 1.22237200  | 2.70006600  |
| H     | -1.89713800 | -3.22530800 | 3.57294500  | H | 0.78876400  | 1.45004700  | 2.81496100  |
| C     | -1.82150000 | -1.97918100 | 1.80329800  | H | 1.98697600  | 0.14864200  | 2.84125300  |
| H     | -2.78757100 | -2.34482500 | 1.46001800  | H | 2.38049700  | 1.72651500  | 3.51328900  |
| H     | -2.01758900 | -1.06177300 | 2.37057000  | C | -3.30489400 | -0.56455800 | -0.37218700 |
| C     | -0.94329800 | -1.64457900 | 0.57239900  | C | -4.10711900 | 0.56046800  | -0.19883900 |
| H     | -0.78846600 | -2.60732900 | 0.05788400  | F | -3.58063900 | 1.79404900  | -0.08636800 |
| C     | 3.04349700  | -1.86562900 | -0.27662100 | C | -5.49823500 | 0.52511500  | -0.13400200 |
| C     | 2.82041100  | -2.92530200 | -1.18335300 | F | -6.19531200 | 1.65145400  | 0.03390600  |
| C     | 3.81969000  | -3.88043100 | -1.36385200 | C | -6.16300200 | -0.68283900 | -0.24741200 |
| H     | 3.63895800  | -4.69677000 | -2.05841000 | F | -7.49349000 | -0.73538600 | -0.18337700 |
| C     | 5.02946100  | -3.82101600 | -0.67968300 | C | -5.41761800 | -1.83959500 | -0.42078300 |
| C     | 5.22552800  | -2.76911600 | 0.21150000  | F | -6.03332800 | -3.02054200 | -0.51971300 |
| H     | 6.16063400  | -2.71100200 | 0.76313800  | C | -4.03521500 | -1.74985500 | -0.48345100 |
| C     | 4.26328600  | -1.78453100 | 0.43097500  | F | -3.39028500 | -2.92768900 | -0.62262400 |
| C     | 1.55033800  | -3.06698000 | -1.98341300 | C | -1.02985800 | 0.93279000  | -0.48288400 |
| H     | 1.51724200  | -4.04394200 | -2.46783800 | C | -1.00295000 | 1.64006500  | 0.71930200  |
| H     | 0.64763800  | -2.96962700 | -1.37450400 | F | -1.50758400 | 1.07673100  | 1.83648200  |
| H     | 1.48952800  | -2.30744800 | -2.77141800 | C | -0.48260600 | 2.91260600  | 0.88673100  |
| C     | 6.10420100  | -4.85004900 | -0.90607300 | F | -0.43048400 | 3.47848600  | 2.09727800  |
| H     | 6.83736500  | -4.48404300 | -1.63202100 | C | 0.05842000  | 3.57380300  | -0.20546400 |
| H     | 6.63976200  | -5.07139200 | 0.02005600  | F | 0.61831100  | 4.77622800  | -0.06147400 |
| H     | 5.68634500  | -5.78071800 | -1.29511700 | C | 0.04748600  | 2.93924800  | -1.43238100 |
| C     | 4.60790200  | -0.69111500 | 1.41262400  | F | 0.61921600  | 3.52141000  | -2.49048100 |
| H     | 3.81154300  | -0.51356300 | 2.13832900  | C | -0.49553400 | 1.66118200  | -1.54477900 |
| H     | 5.50255700  | -0.96902000 | 1.97233600  | F | -0.41328900 | 1.14847300  | -2.78914400 |
|       |             |             |             | H | 1.06398800  | -0.60628200 | -1.29872100 |

|        |             |             |             |       |             |             |             |
|--------|-------------|-------------|-------------|-------|-------------|-------------|-------------|
| C      | -1.44998300 | -1.23703500 | -2.08810200 | C     | -0.45488700 | 3.51389900  | -0.19213800 |
| H      | -1.76072100 | -2.28671200 | -2.10461300 | F     | -0.92030300 | 4.75842700  | -0.27311400 |
| H      | -0.42581700 | -1.20501300 | -2.47652100 | C     | -0.73958600 | 2.59510500  | -1.18714800 |
| H      | -2.05668900 | -0.70866300 | -2.83077000 | F     | -1.46564300 | 2.96172000  | -2.24467900 |
| P12_TS |             |             |             | C     | -0.29212400 | 1.28627200  | -1.05519900 |
| P      | -2.10074300 | -1.10718300 | 0.41952700  | F     | -0.68985900 | 0.44315500  | -2.03053900 |
| C      | -1.77058800 | -1.40419400 | 2.19851400  | C     | 2.67553500  | -0.71388300 | -0.04215600 |
| H      | -2.60327900 | -1.03532600 | 2.80753200  | C     | 3.41220600  | -1.86599800 | 0.23769300  |
| H      | -1.74829400 | -2.49557000 | 2.30190100  | F     | 2.79324300  | -2.96515500 | 0.70808900  |
| C      | -0.41137100 | -0.82383100 | 2.60566400  | C     | 4.78073100  | -1.98649800 | 0.04613800  |
| H      | -0.45176800 | 0.26962600  | 2.60583100  | F     | 5.41302300  | -3.12482500 | 0.33382100  |
| H      | -0.23730400 | -1.11497800 | 3.64806300  | C     | 5.49116500  | -0.90699600 | -0.45741200 |
| C      | 0.75352400  | -1.31986300 | 1.73158000  | F     | 6.80457400  | -0.99574600 | -0.64958500 |
| H      | 0.67296700  | -2.41327800 | 1.65232100  | C     | 4.81148100  | 0.25982600  | -0.76344300 |
| H      | 1.66727000  | -1.15144700 | 2.31147200  | F     | 5.47647300  | 1.30383400  | -1.25769400 |
| B      | 1.05097200  | -0.68200800 | 0.23234000  | C     | 3.43573700  | 0.33266500  | -0.56198300 |
| C      | -3.30784600 | -2.37192200 | -0.08976600 | F     | 2.87630500  | 1.49979900  | -0.91647500 |
| C      | -2.80499300 | -3.62512800 | -0.45857600 | H     | -0.56175700 | -1.31969900 | -0.36838100 |
| H      | -1.73094100 | -3.80016700 | -0.46603900 | C     | 0.55273400  | -1.79664900 | -1.14045900 |
| C      | -3.67326000 | -4.65300700 | -0.81198600 | H     | -0.36764000 | -2.11413900 | -1.65231300 |
| H      | -3.27624800 | -5.62138300 | -1.09794100 | H     | 1.05101000  | -2.71359400 | -0.82028000 |
| C      | -5.04816700 | -4.43299800 | -0.80683400 | H     | 1.10974900  | -1.29919900 | -1.93456400 |
| H      | -5.72566500 | -5.23243200 | -1.08865600 | P12_P |             |             |             |
| C      | -5.55430300 | -3.18762300 | -0.44236400 | P     | -2.37152000 | -1.03464900 | 0.26221000  |
| H      | -6.62582500 | -3.01666300 | -0.43558400 | C     | -1.62297600 | -1.75263700 | 1.75045500  |
| C      | -4.68970100 | -2.15865300 | -0.08205700 | H     | -2.45003700 | -1.76193200 | 2.47345300  |
| H      | -5.08626700 | -1.18837200 | 0.20208100  | H     | -1.43328200 | -2.79906500 | 1.47821300  |
| C      | -2.93667400 | 0.49852800  | 0.26725900  | C     | -0.34846200 | -1.11523900 | 2.33655100  |
| C      | -2.87203300 | 1.44384900  | 1.29402100  | H     | -0.45213900 | -0.02734700 | 2.37307800  |
| H      | -2.39816900 | 1.19930100  | 2.23903500  | H     | -0.32862200 | -1.44735700 | 3.38211100  |
| C      | -3.39547800 | 2.72017000  | 1.10099400  | C     | 0.96101700  | -1.50881700 | 1.64480900  |
| H      | -3.32527700 | 3.45476100  | 1.89679900  | H     | 1.02048400  | -2.60563500 | 1.65411900  |
| C      | -3.98592300 | 3.05803300  | -0.11267000 | H     | 1.75744300  | -1.17274800 | 2.31805700  |
| H      | -4.37871900 | 4.05765500  | -0.26561600 | B     | 1.28494200  | -0.97745900 | 0.09878100  |
| C      | -4.06228500 | 2.11414600  | -1.13541900 | C     | -3.75904200 | -2.08294000 | -0.21654000 |
| H      | -4.51216100 | 2.37738100  | -2.08679700 | C     | -3.51128700 | -3.17587100 | -1.05313800 |
| C      | -3.53431400 | 0.84185800  | -0.95246200 | H     | -2.51296600 | -3.35112300 | -1.44778000 |
| H      | -3.57317400 | 0.11792600  | -1.76205200 | C     | -4.55343300 | -4.03509800 | -1.38464700 |
| C      | 0.44933700  | 0.82446600  | 0.02607100  | H     | -4.36666500 | -4.88112500 | -2.03708400 |
| C      | 0.73548600  | 1.80012600  | 0.97905400  | C     | -5.83254000 | -3.80232100 | -0.88468100 |
| F      | 1.49146600  | 1.47885900  | 2.04235500  | H     | -6.64453400 | -4.47232300 | -1.14741700 |
| C      | 0.29238600  | 3.11228700  | 0.90703100  | C     | -6.07787700 | -2.71087300 | -0.05411400 |
| F      | 0.57817100  | 3.98809400  | 1.87080800  | H     | -7.07692700 | -2.53088900 | 0.32805400  |

|        |             |             |             |   |             |             |             |
|--------|-------------|-------------|-------------|---|-------------|-------------|-------------|
| C      | -5.04243000 | -1.84568300 | 0.28249600  | C | -2.70687200 | -1.37476200 | -1.71308200 |
| H      | -5.23277900 | -0.98430700 | 0.91739500  | H | -2.35041000 | -2.36290500 | -1.40240000 |
| C      | -2.95878300 | 0.64846800  | 0.48692700  | H | -3.76515900 | -1.46821100 | -1.97931400 |
| C      | -2.83429000 | 1.31387200  | 1.70773500  | C | -1.86505000 | -0.86207800 | -2.88488900 |
| H      | -2.41000100 | 0.81344000  | 2.57180600  | H | -2.05547400 | -1.52554900 | -3.73572900 |
| C      | -3.24546800 | 2.64149000  | 1.80934300  | H | -2.21520800 | 0.13461400  | -3.18314900 |
| H      | -3.13322400 | 3.16586000  | 2.75186000  | C | -0.35966700 | -0.82570600 | -2.59534900 |
| C      | -3.77589500 | 3.29422600  | 0.70157400  | H | 0.14953800  | -0.76324300 | -3.56241700 |
| H      | -4.07279600 | 4.33469800  | 0.77888500  | H | -0.07073400 | -1.79821000 | -2.18271300 |
| C      | -3.91046100 | 2.62470000  | -0.51487200 | C | 0.12702000  | 0.35118700  | -1.70770500 |
| H      | -4.30486800 | 3.13990300  | -1.38358900 | H | -0.65863600 | 1.11420800  | -1.67258200 |
| C      | -3.50510500 | 1.30188500  | -0.62553600 | H | 0.93250300  | 0.85147600  | -2.26100300 |
| H      | -3.57539100 | 0.79312600  | -1.58420600 | C | -3.57111800 | -1.09264000 | 1.04923000  |
| C      | 0.56765400  | 0.50686800  | -0.14293300 | C | -4.60696300 | -0.42925800 | 1.71408500  |
| C      | 0.71926900  | 1.51566400  | 0.81142400  | H | -4.86613400 | 0.58864800  | 1.44027100  |
| F      | 1.42987100  | 1.27687100  | 1.92645400  | C | -5.30933800 | -1.07294100 | 2.72974500  |
| C      | 0.16365800  | 2.78336300  | 0.71341600  | H | -6.11318200 | -0.55168600 | 3.23934300  |
| F      | 0.30137900  | 3.67624200  | 1.69589500  | C | -4.98273500 | -2.37612000 | 3.09202300  |
| C      | -0.56067800 | 3.11980100  | -0.42144200 | H | -5.53130100 | -2.87428300 | 3.88470500  |
| F      | -1.14062000 | 4.31670400  | -0.52702400 | C | -3.94403400 | -3.03786000 | 2.44086700  |
| C      | -0.70709900 | 2.17831600  | -1.42388300 | H | -3.67889400 | -4.05093800 | 2.72483700  |
| F      | -1.46314500 | 2.46028300  | -2.49197400 | C | -3.23629900 | -2.40017500 | 1.42822000  |
| C      | -0.14963100 | 0.91456100  | -1.26216500 | H | -2.41339200 | -2.91762900 | 0.94347500  |
| F      | -0.43749800 | 0.04231500  | -2.25730500 | C | -3.40708800 | 1.25829200  | -0.67758300 |
| C      | 2.92576500  | -0.77198700 | -0.05221100 | C | -4.70448000 | 1.26193200  | -1.20440500 |
| C      | 3.78950600  | -1.77592300 | 0.38764600  | H | -5.24078700 | 0.32571100  | -1.33816400 |
| F      | 3.29275200  | -2.89448000 | 0.95060700  | C | -5.31631300 | 2.46356100  | -1.54151900 |
| C      | 5.17260300  | -1.72767800 | 0.28058600  | H | -6.32212800 | 2.46258500  | -1.94868300 |
| F      | 5.93120300  | -2.73149500 | 0.73004400  | C | -4.63663800 | 3.66766100  | -1.35770200 |
| C      | 5.76918800  | -0.62162200 | -0.30582200 | H | -5.11536700 | 4.60404200  | -1.62571200 |
| F      | 7.09581500  | -0.54721800 | -0.42126800 | C | -3.34747800 | 3.67073300  | -0.83582100 |
| C      | 4.96297400  | 0.40071600  | -0.77546100 | H | -2.81371500 | 4.60520500  | -0.69926000 |
| F      | 5.51774000  | 1.47085200  | -1.35205000 | C | -2.73205300 | 2.46842300  | -0.49485300 |
| C      | 3.58039400  | 0.30360600  | -0.64771300 | H | -1.71550200 | 2.47378100  | -0.11153900 |
| F      | 2.89736500  | 1.34469800  | -1.16076700 | C | 1.65896700  | -1.30919700 | -0.31949200 |
| H      | -1.49949800 | -1.07827700 | -0.82376000 | C | 1.00749100  | -2.52096900 | -0.12673500 |
| C      | 0.88644100  | -2.13559400 | -0.99719100 | F | -0.32813200 | -2.53361800 | 0.12303800  |
| H      | -0.14611100 | -2.51769700 | -0.93130200 | C | 1.61230200  | -3.76552800 | -0.22016200 |
| H      | 1.51743200  | -3.00923800 | -0.79721900 | F | 0.91233100  | -4.88370700 | -0.02072700 |
| H      | 1.05074900  | -1.84541300 | -2.03890600 | C | 2.95934600  | -3.83153400 | -0.54246100 |
| P13_TS |             |             |             | F | 3.57209100  | -5.00883000 | -0.63820500 |
| P      | -2.55905500 | -0.28983200 | -0.23849800 | C | 3.65501300  | -2.65476800 | -0.78018800 |
| B      | 0.84694500  | 0.10598200  | -0.24409100 | F | 4.94496100  | -2.70675200 | -1.10772600 |
|        |             |             |             | C | 2.99768700  | -1.43428800 | -0.67816200 |



|       |             |             |             |        |             |             |             |
|-------|-------------|-------------|-------------|--------|-------------|-------------|-------------|
| F     | 3.72928600  | -0.34582300 | -0.94965700 | C      | 3.25329300  | -2.32267400 | -0.16231200 |
| C     | 1.74887500  | 1.41452800  | 0.18038700  | C      | 4.51007600  | -2.47852000 | -0.75684500 |
| C     | 2.82627800  | 1.31550100  | 1.06334400  | H      | 4.99813600  | -1.63584300 | -1.24085700 |
| F     | 3.15189600  | 0.12345100  | 1.59175500  | C      | 5.14108700  | -3.71487600 | -0.70839200 |
| C     | 3.60239700  | 2.38600000  | 1.48068600  | H      | 6.11607400  | -3.84258200 | -1.16610900 |
| F     | 4.61794900  | 2.20449700  | 2.32373700  | C      | 4.52303100  | -4.78749700 | -0.06536900 |
| C     | 3.30151400  | 3.66106700  | 1.02379900  | H      | 5.02032400  | -5.75122500 | -0.02794200 |
| F     | 4.02581500  | 4.70654400  | 1.41373800  | C      | 3.27650900  | -4.62861800 | 0.53302200  |
| C     | 2.22336800  | 3.82835600  | 0.17239900  | H      | 2.80016700  | -5.46304300 | 1.03581000  |
| F     | 1.89583800  | 5.04790200  | -0.25793900 | C      | 2.63431900  | -3.39461500 | 0.48750800  |
| C     | 1.47603100  | 2.72096300  | -0.21788500 | H      | 1.65908800  | -3.26727300 | 0.95107000  |
| F     | 0.42211100  | 3.00756300  | -1.00804300 | C      | -0.63227800 | 0.82402200  | 0.10218500  |
| H     | -0.91717900 | -0.10712900 | 0.30090400  | C      | 0.35094200  | 1.40305400  | 0.90031000  |
| C     | -0.04101700 | -0.03007400 | 1.40573300  | F      | 0.80688900  | 0.78403600  | 2.01478000  |
| H     | 0.93373300  | -0.18743700 | 1.87243100  | C      | 0.99809100  | 2.60592100  | 0.61948700  |
| H     | -0.65385500 | -0.85528000 | 1.78593900  | F      | 1.96479000  | 3.05980600  | 1.42223800  |
| H     | -0.43983600 | 0.91691500  | 1.78380700  | C      | 0.65514700  | 3.31455200  | -0.51681500 |
| P13_P |             |             |             | F      | 1.27511900  | 4.45521500  | -0.82051900 |
| P     | 2.40995700  | -0.73543400 | -0.23013000 | C      | -0.36046700 | 2.82057000  | -1.32811300 |
| B     | -1.32304900 | -0.67872400 | 0.34897000  | F      | -0.73907200 | 3.51298800  | -2.40310700 |
| C     | 1.90760500  | -0.34510400 | -1.93066000 | C      | -0.97546700 | 1.62142500  | -0.99628700 |
| H     | 1.40667500  | 0.63087300  | -1.89572100 | F      | -1.98181700 | 1.25259500  | -1.80452900 |
| H     | 2.85746200  | -0.22068000 | -2.46592100 | C      | -2.98480600 | -0.56367000 | 0.31589400  |
| C     | 1.03878600  | -1.40416400 | -2.63236100 | C      | -3.73660600 | 0.60779100  | 0.41303000  |
| H     | 1.15403100  | -1.22316800 | -3.70658600 | F      | -3.14674800 | 1.81429500  | 0.50082700  |
| H     | 1.45631900  | -2.40143200 | -2.44042200 | C      | -5.12662900 | 0.65453000  | 0.44599600  |
| C     | -0.44624000 | -1.37325400 | -2.26361000 | F      | -5.76298000 | 1.82665600  | 0.52234800  |
| H     | -0.94143700 | -2.06868000 | -2.95078400 | C      | -5.85453600 | -0.52206400 | 0.41728500  |
| H     | -0.84297300 | -0.38807200 | -2.51788800 | F      | -7.18756800 | -0.50206000 | 0.45535400  |
| C     | -0.76225300 | -1.76416100 | -0.80182800 | C      | -5.16649400 | -1.72269600 | 0.36397400  |
| H     | 0.13045900  | -2.27337300 | -0.39733000 | F      | -5.84045200 | -2.87668500 | 0.36416700  |
| H     | -1.49215100 | -2.57455900 | -0.82839200 | C      | -3.77766700 | -1.71515700 | 0.32971100  |
| C     | 3.48474700  | 0.56328700  | 0.40089000  | F      | -3.21855600 | -2.94305700 | 0.33722900  |
| C     | 3.78642800  | 0.55783600  | 1.76660100  | H      | 1.33252200  | -0.85958400 | 0.64313100  |
| H     | 3.37788600  | -0.21132300 | 2.41629800  | C      | -0.97870000 | -1.31167500 | 1.82529700  |
| C     | 4.59472500  | 1.55632600  | 2.29382300  | H      | -1.29428100 | -0.67050100 | 2.65547500  |
| H     | 4.82488400  | 1.55888400  | 3.35351500  | H      | 0.08401900  | -1.53889000 | 2.00535400  |
| C     | 5.09093200  | 2.56088800  | 1.46607100  | H      | -1.51220900 | -2.26364000 | 1.92724700  |
| H     | 5.71263800  | 3.34583900  | 1.88384200  | S      |             |             |             |
| C     | 4.78092300  | 2.57263400  | 0.10938600  | P14_TS |             |             |             |
| H     | 5.15398800  | 3.36475200  | -0.53041000 | P      | -2.61356400 | -1.06634500 | 0.02237000  |
| C     | 3.97809900  | 1.57284000  | -0.42972900 | B      | 0.65518200  | -0.39683700 | 0.01964200  |
| H     | 3.72219900  | 1.60297500  | -1.48425900 | C      | -2.26562100 | -0.16538300 | 1.58276500  |
|       |             |             |             | H      | -2.11768900 | 0.86818600  | 1.25508200  |

|   |             |             |             |       |             |             |             |
|---|-------------|-------------|-------------|-------|-------------|-------------|-------------|
| H | -3.12702000 | -0.16970700 | 2.26012700  | C     | 2.26898400  | -0.66122200 | -0.16495500 |
| C | -0.98069700 | -0.64722800 | 2.28362700  | C     | 2.78811400  | -1.95110500 | -0.04677300 |
| H | -1.24484800 | -1.43613900 | 2.99981600  | F     | 1.96548000  | -2.99536300 | 0.17341500  |
| H | -0.62001200 | 0.18969400  | 2.89146800  | C     | 4.13357200  | -2.26617000 | -0.16668600 |
| C | 0.17663500  | -1.15511200 | 1.39575000  | F     | 4.55250400  | -3.52593700 | -0.04330800 |
| H | 0.01148200  | -2.20331500 | 1.14776500  | C     | 5.04668000  | -1.25332700 | -0.42159600 |
| H | 1.05514400  | -1.17600400 | 2.05081900  | F     | 6.34266500  | -1.52970600 | -0.54103900 |
| C | -3.17305000 | -2.82587900 | 0.45248600  | C     | 4.58704400  | 0.04549300  | -0.56009100 |
| C | -4.14322600 | -2.86541500 | 1.64040700  | F     | 5.44798700  | 1.02988500  | -0.81703400 |
| H | -4.37234200 | -3.91205200 | 1.87202300  | C     | 3.22619800  | 0.31328800  | -0.43853600 |
| H | -5.08663400 | -2.35534400 | 1.44708700  | F     | 2.88177800  | 1.59749400  | -0.61693400 |
| H | -3.68806600 | -2.42609800 | 2.53370300  | H     | -1.00680900 | -0.98718100 | -0.75539700 |
| C | -3.79017700 | -3.48852600 | -0.78896200 | C     | 0.12134400  | -1.19862300 | -1.57578900 |
| H | -3.09024900 | -3.48084400 | -1.63175800 | H     | 0.50199600  | -2.21629500 | -1.47564500 |
| H | -4.72223400 | -3.02342800 | -1.11137700 | H     | -0.75692500 | -1.24562200 | -2.23274400 |
| H | -4.00998700 | -4.53541200 | -0.55288900 | H     | 0.80660300  | -0.58420200 | -2.16262000 |
| C | -1.94617200 | -3.67095100 | 0.83547900  |       |             |             |             |
| H | -1.51092200 | -3.35350300 | 1.78460200  | P14_P |             |             |             |
| H | -1.16770400 | -3.64929300 | 0.06678000  | P     | -3.28243400 | -0.76893000 | -0.03264400 |
| H | -2.27238600 | -4.71033200 | 0.95406000  | B     | 0.64433200  | -0.25521800 | -0.21062800 |
| C | -4.03450400 | -0.13577600 | -0.82396600 | C     | -2.33111700 | 0.60142500  | 0.69326800  |
| C | -3.83124600 | 1.37889400  | -0.65853900 | H     | -1.86501200 | 1.09186900  | -0.16637500 |
| H | -2.88724100 | 1.71767300  | -1.08126200 | H     | -3.07269300 | 1.29376100  | 1.11273600  |
| H | -3.90323200 | 1.69934700  | 0.38383300  | C     | -1.24208400 | 0.22500000  | 1.70908100  |
| H | -4.62899800 | 1.88648000  | -1.21200000 | H     | -1.70980900 | -0.15393300 | 2.62766700  |
| C | -5.42439400 | -0.45549700 | -0.25845400 | H     | -0.77176800 | 1.17456200  | 1.98949700  |
| H | -6.15622700 | 0.18387000  | -0.76531900 | C     | -0.18153100 | -0.73302100 | 1.15856800  |
| H | -5.48216600 | -0.23348500 | 0.81186900  | H     | -0.63589900 | -1.71591700 | 0.97657400  |
| H | -5.73466000 | -1.48892500 | -0.41616500 | H     | 0.53971300  | -0.89830400 | 1.96885400  |
| C | -3.96820700 | -0.44554300 | -2.32834500 | C     | -4.10883300 | -1.81617600 | 1.26433100  |
| H | -4.08365700 | -1.50767600 | -2.5533430  | C     | -4.72836500 | -0.91381400 | 2.34132200  |
| H | -3.01694500 | -0.10166200 | -2.74571700 | H     | -5.18378900 | -1.55230900 | 3.10500400  |
| H | -4.77300800 | 0.09274000  | -2.84157400 | H     | -5.51035300 | -0.26104300 | 1.94494900  |
| C | 0.27137100  | 1.18142600  | 0.02428800  | H     | -3.97247100 | -0.29668000 | 2.83447300  |
| C | -0.45612200 | 1.87862000  | -0.92653600 | C     | -5.17813700 | -2.72487000 | 0.64172700  |
| F | -0.93868100 | 1.25731700  | -2.02635300 | H     | -4.76274200 | -3.36203800 | -0.14504600 |
| C | -0.79644400 | 3.22310500  | -0.80970300 | H     | -6.02656800 | -2.16977000 | 0.23690400  |
| F | -1.55579400 | 3.80594200  | -1.73956500 | H     | -5.56073100 | -3.38236700 | 1.42880600  |
| C | -0.38092400 | 3.93811900  | 0.29971600  | C     | -3.03577500 | -2.72163200 | 1.89899700  |
| F | -0.70256300 | 5.22136800  | 0.43704300  | H     | -2.24579300 | -2.16221800 | 2.40003900  |
| C | 0.37734800  | 3.29492100  | 1.27146400  | H     | -2.57094800 | -3.38065800 | 1.15960800  |
| F | 0.79997400  | 3.97317200  | 2.33666400  | H     | -3.53201200 | -3.35102300 | 2.64508000  |
| C | 0.68242900  | 1.95299400  | 1.11183500  | C     | -4.40617900 | -0.07161700 | -1.34681000 |
| F | 1.43761400  | 1.38930400  | 2.06730000  | C     | -3.63890200 | 1.02120500  | -2.11598000 |

|        |             |             |             |   |             |             |             |
|--------|-------------|-------------|-------------|---|-------------|-------------|-------------|
| H      | -2.70684100 | 0.65730300  | -2.55466600 | C | 0.47261600  | -1.10024000 | 1.96788700  |
| H      | -3.40582200 | 1.88954800  | -1.49615300 | H | 0.52339300  | -0.05172100 | 2.26566500  |
| H      | -4.28452900 | 1.35944200  | -2.93293900 | H | 1.44550700  | -1.53490700 | 2.21555300  |
| C      | -5.65403600 | 0.56119000  | -0.71520400 | C | -0.62085100 | -1.81605800 | 2.75490800  |
| H      | -6.23514200 | 1.03729000  | -1.51117500 | H | -1.59384200 | -1.33813400 | 2.60885300  |
| H      | -5.39394400 | 1.34023800  | 0.00864800  | H | -0.40595900 | -1.79892600 | 3.82624700  |
| H      | -6.30155800 | -0.16994600 | -0.22665300 | H | -0.69951300 | -2.86420100 | 2.44594000  |
| C      | -4.78736300 | -1.18277300 | -2.33651200 | C | -1.76459700 | 1.06979800  | -0.11324700 |
| H      | -5.38038800 | -1.97754700 | -1.88185600 | C | -1.70316900 | 1.75017800  | 1.10035400  |
| H      | -3.89859400 | -1.62518000 | -2.79657500 | F | -1.37634500 | 1.11644400  | 2.22272900  |
| H      | -5.38786500 | -0.73863200 | -3.13676600 | C | -1.98238300 | 3.10663100  | 1.19167600  |
| C      | 0.87809100  | 1.37743400  | -0.06156200 | F | -1.90124600 | 3.73324700  | 2.35829600  |
| C      | 0.23124200  | 2.36967900  | -0.78644900 | C | -2.36201000 | 3.80721500  | 0.05278700  |
| F      | -0.66238800 | 2.05872900  | -1.75989700 | F | -2.63147300 | 5.09875100  | 0.13345900  |
| C      | 0.38207900  | 3.73604500  | -0.56230700 | C | -2.47692400 | 3.14925300  | -1.16532000 |
| F      | -0.29229900 | 4.62486300  | -1.29955000 | F | -2.84917100 | 3.81560100  | -2.24835500 |
| C      | 1.22864500  | 4.16892500  | 0.44216800  | C | -2.18439600 | 1.79569100  | -1.23098600 |
| F      | 1.38855800  | 5.47062100  | 0.68198000  | F | -2.29205600 | 1.19217100  | -2.41244400 |
| C      | 1.89453800  | 3.22361900  | 1.21248700  | C | -2.60308000 | -1.72187400 | -0.20535200 |
| F      | 2.70163500  | 3.62582300  | 2.19623100  | C | -3.62006100 | -1.52430200 | 0.72650300  |
| C      | 1.70000400  | 1.87604000  | 0.95105200  | F | -3.57786300 | -0.48608800 | 1.56140600  |
| F      | 2.35793400  | 1.02009200  | 1.74915900  | C | -4.68880400 | -2.40207400 | 0.83765000  |
| C      | 2.08404800  | -1.07781700 | -0.25380700 | F | -5.64313800 | -2.19584900 | 1.73590500  |
| C      | 2.10261200  | -2.45977600 | -0.07359100 | C | -4.75236900 | -3.50998600 | 0.00022800  |
| F      | 0.95567600  | -3.13332800 | 0.16782800  | F | -5.76656300 | -4.35380900 | 0.10003000  |
| C      | 3.24256100  | -3.24991600 | -0.14030900 | C | -3.74992700 | -3.74035300 | -0.93405800 |
| F      | 3.17148600  | -4.57145600 | 0.05016500  | F | -3.81272800 | -4.80037400 | -1.72897200 |
| C      | 4.46351500  | -2.65600600 | -0.41691600 | C | -2.69523300 | -2.84456100 | -1.02616400 |
| F      | 5.57418700  | -3.39146800 | -0.48789800 | F | -1.74133300 | -3.08408300 | -1.92736800 |
| C      | 4.50648000  | -1.28748800 | -0.62683800 | C | 1.55145200  | 1.03714700  | -0.33578500 |
| F      | 5.67069100  | -0.69672000 | -0.90861000 | C | 2.11725700  | 1.59005700  | 0.81342700  |
| C      | 3.33451700  | -0.54169900 | -0.55185000 | F | 2.73982900  | 0.79837700  | 1.69847500  |
| F      | 3.48325700  | 0.77010700  | -0.80205200 | C | 2.06814300  | 2.94228400  | 1.12823600  |
| H      | -2.40439900 | -1.62772300 | -0.70459200 | F | 2.61639300  | 3.40105900  | 2.24979000  |
| C      | -0.09739600 | -0.68618500 | -1.61112200 | C | 1.43555400  | 3.82104700  | 0.25881400  |
| H      | -0.20859800 | -1.77949400 | -1.64534500 | F | 1.34814800  | 5.11407000  | 0.54992700  |
| H      | -1.08697700 | -0.24946500 | -1.78165500 | C | 0.88203000  | 3.32713000  | -0.91158300 |
| H      | 0.50007100  | -0.40172900 | -2.48493400 | F | 0.24414800  | 4.14871300  | -1.74871100 |
|        |             |             |             | C | 0.96790100  | 1.96801500  | -1.18699500 |
| P15_TS |             |             |             | F | 0.36381300  | 1.57296900  | -2.32677800 |
| P      | -1.17410200 | -0.62082500 | -0.43031600 | C | 2.96590200  | -1.27650300 | -0.27755500 |
| B      | 1.50877000  | -0.58955600 | -0.51440700 | C | 4.12026500  | -0.65580600 | -0.75577800 |
| C      | 0.31022600  | -1.20974400 | 0.45404800  | F | 4.02426500  | 0.50333100  | -1.42789700 |
| H      | 0.22672900  | -2.27688200 | 0.18660000  | C | 5.39888700  | -1.17435600 | -0.61120800 |

|       |             |             |             |        |             |             |             |
|-------|-------------|-------------|-------------|--------|-------------|-------------|-------------|
| F     | 6.45666100  | -0.52560700 | -1.09272200 | F      | 3.86899900  | -4.88271300 | 1.51421700  |
| C     | 5.56681700  | -2.39130200 | 0.03472000  | C      | 2.71965900  | -2.90592500 | 0.94099900  |
| F     | 6.78043700  | -2.91120300 | 0.18440800  | F      | 1.84579200  | -3.13267700 | 1.92043500  |
| C     | 4.45203400  | -3.06401000 | 0.50807000  | C      | -1.50475300 | 1.11004600  | 0.53306300  |
| F     | 4.59254500  | -4.24201400 | 1.11327500  | C      | -1.94420400 | 1.70302300  | -0.65241600 |
| C     | 3.18944900  | -2.50709700 | 0.33419100  | F      | -2.61177400 | 0.97685700  | -1.56138900 |
| F     | 2.16803100  | -3.25061800 | 0.79819200  | C      | -1.72691400 | 3.03184500  | -0.99449300 |
| H     | -0.03309000 | -0.70931600 | -1.67500500 | F      | -2.15535900 | 3.51786200  | -2.15728000 |
| C     | 1.20504600  | -1.02880700 | -2.24952300 | C      | -1.04758200 | 3.85766200  | -0.10921500 |
| H     | 1.35495400  | -2.10768200 | -2.30627300 | F      | -0.76210200 | 5.11575400  | -0.43545500 |
| H     | 2.08845200  | -0.48356300 | -2.59405500 | C      | -0.60667000 | 3.33094900  | 1.09255600  |
| H     | 0.48122500  | -0.76453300 | -3.04022800 | F      | 0.11401500  | 4.08983400  | 1.92650200  |
| P15_P |             |             |             | C      | -0.83633200 | 1.98978900  | 1.37800100  |
| P     | 1.16556300  | -0.67506800 | 0.48490800  | F      | -0.23674500 | 1.54459500  | 2.50304000  |
| B     | -1.65524400 | -0.51004100 | 0.83563600  | C      | -3.11465600 | -1.10704700 | 0.35453200  |
| C     | -0.43061400 | -1.28526700 | -0.07663600 | C      | -4.28625800 | -0.35229900 | 0.33551200  |
| H     | -0.34583000 | -2.30600500 | 0.33319000  | F      | -4.25625700 | 0.96492100  | 0.59251200  |
| C     | -0.64835200 | -1.38277200 | -1.59337000 | C      | -5.54500300 | -0.87717000 | 0.06826200  |
| H     | -0.84149200 | -0.39190100 | -2.00388300 | F      | -6.61971000 | -0.08848300 | 0.05783700  |
| H     | -1.58163200 | -1.93999700 | -1.70661600 | C      | -5.68468200 | -2.23437100 | -0.17597400 |
| C     | 0.45033000  | -2.07915000 | -2.39201300 | F      | -6.88176400 | -2.75662500 | -0.43258800 |
| H     | 1.35395100  | -1.46561000 | -2.46106300 | C      | -4.55698000 | -3.03966200 | -0.14512900 |
| H     | 0.11640500  | -2.26665100 | -3.41536500 | F      | -4.66490100 | -4.35117500 | -0.36433500 |
| H     | 0.71647100  | -3.04466500 | -1.94704000 | C      | -3.32284400 | -2.46555100 | 0.12852100  |
| C     | 1.72880300  | 1.00781400  | 0.14380000  | F      | -2.28178200 | -3.32801700 | 0.16405200  |
| C     | 1.49839000  | 1.67245900  | -1.05650100 | H      | 1.12724400  | -0.68449900 | 1.87648400  |
| F     | 0.94576300  | 1.03007700  | -2.08032300 | C      | -1.55009300 | -0.92771500 | 2.41097100  |
| C     | 1.83205300  | 3.00778900  | -1.22049000 | H      | -1.73639300 | -2.00392300 | 2.51288400  |
| F     | 1.56468400  | 3.63107700  | -2.35760600 | H      | -2.33247700 | -0.41817100 | 2.98469700  |
| C     | 2.42065600  | 3.69943000  | -0.16698900 | H      | -0.61343800 | -0.71021300 | 2.93384300  |
| F     | 2.73043300  | 4.97353400  | -0.31002800 | P16_TS |             |             |             |
| C     | 2.68749100  | 3.05353900  | 1.03500700  | C      | 0.24515400  | -1.78143400 | 2.73332100  |
| F     | 3.24778100  | 3.71491300  | 2.03428500  | H      | 1.26624600  | -1.49981500 | 2.47824300  |
| C     | 2.33808200  | 1.72025200  | 1.17883100  | H      | 0.20569800  | -2.85718000 | 2.93647200  |
| F     | 2.59442100  | 1.12182100  | 2.33967800  | H      | -0.01457900 | -1.27241800 | 3.66714200  |
| C     | 2.57243600  | -1.77348500 | 0.14339800  | C      | -0.74315600 | -1.40989200 | 1.67504300  |
| C     | 3.49346800  | -1.57659100 | -0.88238300 | H      | -1.79127200 | -1.53612400 | 1.95642300  |
| F     | 3.37901100  | -0.52996700 | -1.69936200 | C      | -0.52277400 | -0.92789400 | 0.44795600  |
| C     | 4.53019300  | -2.47073800 | -1.10491300 | P      | 1.04285200  | -0.69692900 | -0.40695600 |
| F     | 5.39596500  | -2.26874600 | -2.08708200 | C      | 2.31017300  | -1.95908300 | -0.08415700 |
| C     | 4.65625700  | -3.58833800 | -0.28604400 | C      | 3.30096900  | -1.85154800 | 0.88962600  |
| F     | 5.64065600  | -4.44431200 | -0.49247900 | F      | 3.32436800  | -0.80363100 | 1.71442200  |
| C     | 3.74742700  | -3.81500100 | 0.74135000  | C      | 4.26702600  | -2.83181200 | 1.06103500  |

|   |             |             |             |       |             |             |             |
|---|-------------|-------------|-------------|-------|-------------|-------------|-------------|
| F | 5.19645500  | -2.71037000 | 1.99990000  | H     | -1.52970500 | -2.03650700 | -2.26936700 |
| C | 4.25222100  | -3.95333500 | 0.23902300  | H     | -2.10375500 | -0.38593800 | -2.73655100 |
| F | 5.16862900  | -4.89479500 | 0.39432800  |       |             |             |             |
| C | 3.27307900  | -4.09483100 | -0.73715700 | P16_P |             |             |             |
| F | 3.26260500  | -5.16760700 | -1.51690200 | C     | -0.93872900 | -1.96194100 | -2.31715500 |
| C | 2.31990500  | -3.09760300 | -0.88843600 | H     | -1.65014500 | -1.13599300 | -2.38639200 |
| F | 1.39264200  | -3.24699500 | -1.83271400 | H     | -1.48150300 | -2.87280500 | -2.03779100 |
| C | 1.80914800  | 0.91801700  | -0.08229000 | H     | -0.53010100 | -2.12464500 | -3.31580000 |
| C | 2.46264100  | 1.54858900  | -1.14150900 | C     | 0.17805400  | -1.67125000 | -1.35216600 |
| F | 2.66304600  | 0.88625800  | -2.28035800 | H     | 1.16659700  | -2.00414300 | -1.66982400 |
| C | 2.89991900  | 2.86163600  | -1.05751700 | C     | 0.15700800  | -1.04147700 | -0.16729500 |
| F | 3.50812700  | 3.44100600  | -2.08287300 | P     | -1.36313100 | -0.49238800 | 0.55220500  |
| C | 2.67068500  | 3.57666100  | 0.11261400  | C     | -2.92945200 | -1.28440600 | 0.09317600  |
| F | 3.05883500  | 4.83728200  | 0.20350500  | C     | -3.79194500 | -0.81339800 | -0.89329900 |
| C | 2.02840000  | 2.97250000  | 1.18694900  | F     | -3.47756600 | 0.27696100  | -1.58900100 |
| F | 1.78441200  | 3.66864500  | 2.28975900  | C     | -4.97008700 | -1.47435900 | -1.20370600 |
| C | 1.61169700  | 1.65242000  | 1.08367200  | F     | -5.77534200 | -1.01241400 | -2.14858200 |
| F | 0.99237000  | 1.11471200  | 2.13027300  | C     | -5.30104600 | -2.63683300 | -0.51395800 |
| B | -1.62536200 | -0.36836400 | -0.62857100 | F     | -6.42178500 | -3.27237400 | -0.80282000 |
| C | -3.12195200 | -0.92649000 | -0.35207900 | C     | -4.45727700 | -3.13527800 | 0.47165500  |
| C | -4.27328800 | -0.14586600 | -0.27678100 | F     | -4.77469700 | -4.24475600 | 1.12005000  |
| F | -4.21845300 | 1.18031500  | -0.45347100 | C     | -3.28421500 | -2.45415200 | 0.76376700  |
| C | -5.53697700 | -0.66989800 | -0.02877400 | F     | -2.48328300 | -2.94230100 | 1.70633300  |
| F | -6.60006400 | 0.12894100  | 0.03856800  | C     | -1.52286200 | 1.29878600  | 0.47430100  |
| C | -5.69023800 | -2.03713800 | 0.14198100  | C     | -1.66411300 | 2.04923800  | 1.63941800  |
| F | -6.89152000 | -2.55349100 | 0.37933200  | F     | -1.88665200 | 1.44087900  | 2.80117400  |
| C | -4.57755600 | -2.86164200 | 0.05584900  | C     | -1.54868600 | 3.43202700  | 1.62577600  |
| F | -4.71055000 | -4.17881000 | 0.20492000  | F     | -1.67063700 | 4.13087300  | 2.74246100  |
| C | -3.33446000 | -2.29574300 | -0.19156800 | C     | -1.29549900 | 4.07815000  | 0.42252900  |
| F | -2.30273000 | -3.15092300 | -0.29020900 | F     | -1.16433000 | 5.38909600  | 0.39681600  |
| C | -1.43540500 | 1.25606800  | -0.54730300 | C     | -1.15433200 | 3.35187100  | -0.75769100 |
| C | -0.72879500 | 2.05251200  | -1.43761000 | F     | -0.86800200 | 3.98034700  | -1.88859000 |
| F | -0.22198000 | 1.53491200  | -2.57564900 | C     | -1.25522200 | 1.97317100  | -0.71893300 |
| C | -0.38475000 | 3.37619100  | -1.18307400 | F     | -1.06433600 | 1.28517900  | -1.84007900 |
| F | 0.36942200  | 4.05821900  | -2.04895900 | B     | 1.47573700  | -0.58407900 | 0.77897000  |
| C | -0.75500200 | 3.95804900  | 0.01671600  | C     | 2.68774400  | -1.62915800 | 0.42081000  |
| F | -0.36873300 | 5.19699500  | 0.30451800  | C     | 3.98991200  | -1.28312000 | 0.07078200  |
| C | -1.47343000 | 3.20985200  | 0.94276900  | F     | 4.35210500  | 0.00149800  | -0.06084400 |
| F | -1.82082700 | 3.75359300  | 2.10563900  | C     | 4.99952400  | -2.21327800 | -0.15645200 |
| C | -1.78959300 | 1.89350600  | 0.64416500  | F     | 6.22653900  | -1.81294200 | -0.49071700 |
| F | -2.44508900 | 1.20458700  | 1.58591300  | C     | 4.72803100  | -3.56581900 | -0.02788500 |
| H | -0.04731900 | -0.71728900 | -1.70518600 | F     | 5.68193100  | -4.46998100 | -0.24056100 |
| C | -1.29309700 | -0.97314500 | -2.29619800 | C     | 3.44815000  | -3.96582500 | 0.32772500  |
| H | -0.51323200 | -0.84044600 | -3.06703400 | F     | 3.16693800  | -5.26372100 | 0.45877500  |

|        |             |             |             |   |             |             |             |
|--------|-------------|-------------|-------------|---|-------------|-------------|-------------|
| C      | 2.47360700  | -3.00196900 | 0.54720700  | C | -1.41395800 | 3.18675200  | 2.77727400  |
| F      | 1.25835600  | -3.46688900 | 0.89494700  | H | -0.83010400 | 2.38266000  | 3.22009800  |
| C      | 1.76850700  | 0.96997900  | 0.29142900  | C | -1.43592600 | 4.44647300  | 3.36804700  |
| C      | 1.58185100  | 2.11434700  | 1.06168900  | H | -0.85800400 | 4.63147100  | 4.26866100  |
| F      | 1.18289200  | 2.04436600  | 2.34721200  | C | -2.20237000 | 5.46817300  | 2.81110400  |
| C      | 1.71161000  | 3.41048700  | 0.56951400  | H | -2.22265400 | 6.44982000  | 3.27364300  |
| F      | 1.42055800  | 4.45757800  | 1.35129500  | C | -2.94251500 | 5.22142800  | 1.65792500  |
| C      | 2.03522900  | 3.61491800  | -0.76079100 | H | -3.53895100 | 6.01314300  | 1.21462200  |
| F      | 2.11773500  | 4.84701700  | -1.25488600 | C | -2.91941700 | 3.96043100  | 1.06757400  |
| C      | 2.24451800  | 2.50888900  | -1.57435700 | H | -3.48595800 | 3.76270000  | 0.16102800  |
| F      | 2.56205800  | 2.67869000  | -2.85674300 | C | 3.48573400  | 1.76838800  | -1.18426500 |
| C      | 2.10663900  | 1.23700700  | -1.03671900 | C | 4.52652300  | 2.29131500  | -0.38049400 |
| F      | 2.32543400  | 0.21891900  | -1.88258300 | C | 5.51421100  | 3.08395200  | -0.96825800 |
| H      | -1.32434500 | -0.75870800 | 1.91698200  | H | 6.30877200  | 3.47264000  | -0.33604900 |
| C      | 1.18427400  | -0.72179600 | 2.38009200  | C | 5.51935400  | 3.39029300  | -2.32360600 |
| H      | 0.41400500  | -0.06434700 | 2.79743300  | C | 4.48691600  | 2.87819900  | -3.10109700 |
| H      | 0.91970800  | -1.75592900 | 2.63137800  | H | 4.46064700  | 3.10385900  | -4.16443600 |
| H      | 2.09564300  | -0.48028900 | 2.93637500  | C | 3.47644000  | 2.08304100  | -2.56206500 |
| P18_TS |             |             |             | C | 4.64631300  | 2.05909500  | 1.10347100  |
| P      | 2.14813100  | 0.68977700  | -0.46469200 | H | 5.52040900  | 2.58313500  | 1.49347000  |
| Si     | -3.64092300 | 0.61122500  | 1.70563500  | H | 4.75237500  | 0.99967100  | 1.34540700  |
| B      | -1.14298800 | -0.17913800 | -0.73552000 | H | 3.77531700  | 2.44281500  | 1.64058100  |
| C      | 1.17609400  | 1.82063400  | 0.62628600  | C | 6.58270800  | 4.26928400  | -2.92536000 |
| H      | 0.85871600  | 1.29669800  | 1.52688600  | H | 6.84824900  | 3.93483100  | -3.93118200 |
| H      | 1.78723700  | 2.67984500  | 0.91503500  | H | 7.48695800  | 4.27376100  | -2.31309000 |
| C      | -0.08716500 | 2.25512700  | -0.15226500 | H | 6.22808600  | 5.30203500  | -3.00465800 |
| H      | -0.37806200 | 3.24517900  | 0.19961200  | C | 2.40708900  | 1.60599200  | -3.51011900 |
| H      | 0.14792800  | 2.37341900  | -1.21847300 | H | 2.60160100  | 1.97541200  | -4.51842600 |
| C      | -1.20546700 | 1.24203800  | 0.07500800  | H | 1.41827100  | 1.96462900  | -3.21357000 |
| C      | -2.16049100 | 1.56810800  | 0.97565400  | H | 2.37518500  | 0.51327100  | -3.56228100 |
| C      | -3.63382300 | 0.94802300  | 3.56614000  | C | 3.01178800  | -0.68967700 | 0.40427000  |
| H      | -4.47737700 | 0.42397800  | 4.02828200  | C | 3.57081600  | -1.65587300 | -0.46580500 |
| H      | -3.72150800 | 2.01147300  | 3.80063500  | C | 4.24274200  | -2.75777700 | 0.05948200  |
| H      | -2.71555400 | 0.57085100  | 4.02889900  | H | 4.65618600  | -3.49246600 | -0.62676000 |
| C      | -5.22179200 | 1.38469700  | 1.00826500  | C | 4.37523600  | -2.95106300 | 1.43064600  |
| H      | -5.20793200 | 1.47791500  | -0.08139900 | C | 3.81200200  | -1.99923600 | 2.27467100  |
| H      | -5.36256900 | 2.38700000  | 1.42397300  | H | 3.88825000  | -2.13958800 | 3.35035300  |
| H      | -6.09226000 | 0.78178300  | 1.28739000  | C | 3.12795200  | -0.87648500 | 1.80141800  |
| C      | -3.73767600 | -1.27389300 | 1.55052800  | C | 3.43361100  | -1.56732400 | -1.96675000 |
| H      | -4.03109900 | -1.67037500 | 2.52802400  | H | 3.91961700  | -2.42136800 | -2.44121500 |
| H      | -2.81136400 | -1.77059400 | 1.25812200  | H | 3.89231900  | -0.65591700 | -2.36401800 |
| H      | -4.51121900 | -1.56136300 | 0.83283200  | H | 2.37886700  | -1.58329300 | -2.26725500 |
| C      | -2.15311600 | 2.92644000  | 1.61688000  | C | 5.04797400  | -4.17772300 | 1.98267000  |
|        |             |             |             | H | 5.83215400  | -4.53704600 | 1.31241400  |

|       |             |             |             |   |             |             |             |
|-------|-------------|-------------|-------------|---|-------------|-------------|-------------|
| H     | 4.31197000  | -4.97881600 | 2.10090400  | C | -1.22124400 | 1.30404200  | -0.19053900 |
| H     | 5.49017400  | -3.98223200 | 2.96220700  | C | -2.03741900 | 1.88408300  | 0.72110400  |
| C     | 2.53534500  | 0.02637500  | 2.85911500  | C | -3.47209200 | 1.87547400  | 3.39615900  |
| H     | 1.46192000  | -0.14730700 | 2.98102300  | H | -4.37038300 | 1.57294300  | 3.94527500  |
| H     | 2.68222900  | 1.08370600  | 2.64794400  | H | -3.36134700 | 2.95846800  | 3.49318100  |
| H     | 3.00359000  | -0.18672700 | 3.82195800  | H | -2.61266400 | 1.40289700  | 3.88424800  |
| C     | -2.62603000 | -0.62385700 | -1.29162500 | C | -5.11309600 | 2.25421000  | 0.87750100  |
| F     | -3.15845300 | 1.63039900  | -1.86042300 | H | -5.25496100 | 2.07800000  | -0.19125200 |
| C     | -3.49819500 | 0.33168700  | -1.81601500 | H | -4.98756300 | 3.33111900  | 1.02807500  |
| F     | -5.55209200 | 1.01673600  | -2.75610900 | H | -6.02686100 | 1.95076900  | 1.39984400  |
| C     | -4.75440900 | 0.03623900  | -2.33066600 | C | -4.07791000 | -0.52046500 | 1.70560200  |
| F     | -6.37180600 | -1.58690900 | -2.89150600 | H | -4.56228900 | -0.68114600 | 2.67494400  |
| C     | -5.17791200 | -1.28129400 | -2.39200300 | H | -3.21531100 | -1.18680600 | 1.64841700  |
| F     | -4.71270200 | -3.55258200 | -1.98957700 | H | -4.79026700 | -0.80735600 | 0.92901500  |
| C     | -4.33037200 | 2.27719200  | -1.93149200 | C | -1.69503500 | 3.24659400  | 1.25661600  |
| F     | -2.37079500 | -2.96755900 | -0.93999100 | C | -0.83864000 | 3.41741100  | 2.35249600  |
| C     | -3.09266400 | -1.3465000  | -1.40104100 | H | -0.42502600 | 2.53562300  | 2.83872400  |
| C     | -0.34199500 | -1.39162500 | 0.04146900  | C | -0.53725000 | 4.68704100  | 2.83727100  |
| F     | -0.71235000 | -0.56936900 | 2.26211900  | H | 0.12549700  | 4.79641800  | 3.69098500  |
| C     | -0.19335300 | -1.48856000 | 1.42468400  | C | -1.09192700 | 5.81532900  | 2.23698300  |
| F     | 0.65986700  | -2.49064500 | 3.38848400  | H | -0.86113400 | 6.80580800  | 2.61609100  |
| C     | 0.50592700  | -2.50922500 | 2.06289000  | C | -1.95037400 | 5.66130800  | 1.15161100  |
| F     | 1.83486900  | -4.44896000 | 1.91012000  | H | -2.38894800 | 6.53453600  | 0.67798200  |
| C     | 1.11942800  | 3.49656200  | 1.31589800  | C | -2.25034800 | 4.38966100  | 0.66896500  |
| F     | 1.61454900  | -4.37365900 | -0.81324100 | H | -2.91393500 | 4.26397500  | -0.18313100 |
| C     | 1.00025400  | -3.45832700 | -0.06421600 | C | 3.72710200  | 1.51316100  | -1.09303900 |
| F     | 0.18991500  | -2.50585300 | -1.99503800 | C | 4.72705900  | 2.07764800  | -0.27082200 |
| C     | 0.27182500  | -2.43811500 | -0.65244600 | C | 5.73018700  | 2.83992300  | -0.86164400 |
| H     | 0.72162500  | 0.21097500  | -1.48029800 | H | 6.50035400  | 3.27106800  | -0.22691300 |
| C     | -0.37373300 | 0.10421500  | -2.39062500 | C | 5.77383800  | 3.06455700  | -2.23605600 |
| H     | -0.83260400 | 1.04743300  | -2.69356100 | C | 4.77377000  | 2.50443500  | -3.02492600 |
| H     | -0.87953800 | -0.74059000 | -2.85038800 | H | 4.79040800  | 2.67279400  | -4.09842500 |
| H     | 0.58160300  | 0.05141400  | -2.92835600 | C | 3.74165600  | 1.73367400  | -2.48885700 |
| P18_P |             |             |             | C | 4.74977000  | 1.90370500  | 1.22692900  |
| P     | 2.42148700  | 0.49213400  | -0.34386100 | H | 5.60213100  | 2.43294700  | 1.65521400  |
| Si    | -3.63841700 | 1.31415900  | 1.59364500  | H | 4.82545900  | 0.85230900  | 1.51840900  |
| B     | -1.36457800 | -0.11073800 | -1.02243600 | H | 3.84855000  | 2.31876500  | 1.68963700  |
| C     | 1.18093400  | 1.52761300  | 0.49925000  | C | 6.85629000  | 3.91541000  | -2.84295800 |
| H     | 0.70568100  | 0.92039300  | 1.27036400  | H | 7.81077300  | 3.76237300  | -2.33403000 |
| H     | 1.70647400  | 2.35268000  | 0.99000600  | H | 6.60117300  | 4.97640700  | -2.75502200 |
| C     | 0.09176100  | 2.04088700  | -0.48656400 | H | 6.98924500  | 3.69170200  | -3.90329300 |
| H     | 0.00375600  | 3.11847900  | -0.34216600 | C | 2.69757000  | 1.20265700  | -3.44286500 |
| H     | 0.40113200  | 1.89322100  | -1.52457500 | H | 2.97389000  | 1.45132300  | -4.46839300 |
|       |             |             |             | H | 1.71388300  | 1.64253100  | -3.25550300 |

|   |             |             |             |        |             |             |             |
|---|-------------|-------------|-------------|--------|-------------|-------------|-------------|
| H | 2.58475700  | 0.11525700  | -3.39130900 | C      | -0.91258700 | 0.14574000  | -2.59053300 |
| C | 3.08560900  | -0.92788400 | 0.57096000  | H      | -1.34940400 | 1.08731100  | -2.94564000 |
| C | 3.66293600  | -1.94706800 | -0.22422200 | H      | -1.27310700 | -0.64808800 | -3.25026200 |
| C | 4.16335400  | -3.08453900 | 0.40224400  | H      | 0.16798300  | 0.20345100  | -2.76815200 |
| H | 4.59071100  | -3.87221100 | -0.21249200 |        |             |             |             |
| C | 4.10935000  | -3.24890300 | 1.78407700  | P19_TS |             |             |             |
| C | 3.53607600  | -2.23367100 | 2.54393200  | C      | 3.64194800  | -0.37499500 | 1.10662600  |
| H | 3.46999400  | -2.35245700 | 3.62232600  | C      | 4.77246100  | -0.75128000 | 1.84854700  |
| C | 3.01409900  | -1.07247800 | 1.97355800  | C      | 4.64211400  | -1.14511600 | 3.18756200  |
| C | 3.70687300  | -1.89202300 | -1.73201800 | C      | 3.40339400  | -1.22504900 | 3.83294500  |
| H | 4.29781600  | -2.72434400 | -2.11617200 | C      | 2.25614900  | -0.84823900 | 3.13444200  |
| H | 4.15853800  | -0.96632600 | -2.10206300 | C      | 2.45756200  | -0.38405800 | 1.82700500  |
| H | 2.70165300  | -1.98892300 | -2.16096600 | O      | 1.30103700  | -0.03562300 | 1.23996800  |
| C | 4.59992200  | -4.51368800 | 2.43055800  | C      | 0.28209800  | -0.41889800 | 2.07292000  |
| H | 4.94280900  | -4.33244500 | 3.45144600  | C      | 0.79734400  | -0.87507500 | 3.29451300  |
| H | 5.41686100  | -4.96163300 | 1.86086400  | C      | -0.12864700 | -1.31931800 | 4.24164000  |
| H | 3.78132200  | -5.23850800 | 2.47305400  | C      | -1.47213900 | -1.31098200 | 3.87728400  |
| C | 2.35688200  | -0.09674000 | 2.92111300  | C      | -1.90526000 | -0.90879200 | 2.60103100  |
| H | 1.27847900  | -0.28299800 | 2.97804900  | C      | -1.02496600 | -0.44138600 | 1.61601600  |
| H | 2.50974100  | 0.94744900  | 2.65035300  | B      | -1.39549300 | -0.06507100 | 0.05355200  |
| H | 2.76131100  | -0.23870600 | 3.92484200  | C      | -1.93331000 | 1.48415500  | 0.00395600  |
| C | -2.92056600 | -0.63756500 | -1.17287900 | C      | -3.13899100 | 1.79268500  | 0.63523500  |
| F | -3.59555400 | 1.53158300  | -1.88424900 | F      | -3.87518200 | 0.80518200  | 1.16694600  |
| C | -3.89428900 | 0.24121700  | -1.64827700 | C      | -3.66704400 | 3.06933100  | 0.73395900  |
| F | -6.09453900 | 0.80190100  | -2.30801300 | F      | -4.83002400 | 3.28459900  | 1.34736100  |
| C | -5.21239200 | -0.11532000 | -1.90170100 | C      | -2.96852200 | 4.13712200  | 0.18519400  |
| F | -6.86286100 | -1.80453200 | -1.98493600 | F      | -3.45053000 | 5.37447200  | 0.27225800  |
| C | -5.60777900 | -1.43367100 | -1.73306900 | C      | -1.76717400 | 3.89300700  | -0.45568800 |
| F | -5.02691800 | -3.63676700 | -1.14366500 | C      | -1.28524800 | 2.58960900  | -0.53244200 |
| C | -4.66978600 | -2.36058700 | -1.30706700 | F      | -0.10363000 | 2.46692600  | -1.18705900 |
| F | -2.55586100 | -2.92244500 | -0.58171500 | F      | -1.07580500 | 4.90122000  | -0.99018700 |
| C | -3.36932800 | -1.94930300 | -1.03615600 | C      | -2.44119500 | -1.17309900 | -0.53671500 |
| C | -0.43162200 | -1.30225000 | -0.29496000 | C      | -3.62750300 | -0.92009200 | -1.22103400 |
| F | -0.89660700 | -0.60645200 | 1.94718700  | F      | -4.02303000 | 0.33281600  | -1.48394600 |
| C | -0.35596300 | -1.49623700 | 1.08561500  | C      | -4.47406300 | -1.92207500 | -1.68537800 |
| F | 0.34208400  | -2.64318600 | 3.03798100  | F      | -5.60255200 | -1.61271200 | -2.32443900 |
| C | 0.27312800  | -2.57113100 | 1.70462700  | C      | -4.13713800 | -3.25157500 | -1.48969300 |
| F | 1.52620700  | -4.6426600  | 1.50110000  | F      | -4.93173600 | -4.22276800 | -1.93390700 |
| C | 0.89738300  | -3.5409600  | 0.93256800  | C      | -2.95353600 | -3.55959500 | -0.83450500 |
| F | 1.59180200  | -4.23027900 | -1.20470900 | C      | -2.14393800 | -2.52818400 | -0.38180900 |
| C | 0.90632600  | -3.37258300 | -0.44225400 | F      | -0.99684800 | -2.89850400 | 0.21698400  |
| F | 0.35712100  | -2.22749700 | -2.35461800 | F      | -2.60368000 | -4.83423700 | -0.65522400 |
| C | 0.25801100  | -2.28421100 | -1.01128400 | H      | 5.75588100  | -0.75365200 | 1.39001200  |
| H | 1.74594600  | -0.07636900 | -1.42406400 | H      | 5.53542700  | -1.43104500 | 3.73247300  |



|       |             |             |             |   |             |             |             |
|-------|-------------|-------------|-------------|---|-------------|-------------|-------------|
| H     | 3.34498700  | -1.59370900 | 4.85189100  | C | 1.91390000  | -2.21266600 | 0.15794500  |
| H     | 0.18442100  | -1.68465700 | 5.21406300  | O | 0.80361400  | -1.47887500 | 0.29952400  |
| H     | -2.21104600 | -1.66397600 | 4.58957100  | C | -0.27484000 | -2.35382700 | 0.18348300  |
| H     | -2.96183500 | -0.99145700 | 2.36556700  | C | 0.17830900  | -3.66089000 | -0.01427800 |
| C     | 4.18795200  | 1.62837300  | -1.03626300 | C | -0.78155300 | -4.66919200 | -0.16474800 |
| C     | 4.21093400  | -1.30788600 | -1.72232200 | C | -2.11431700 | -4.28738200 | -0.11096300 |
| H     | 1.43664100  | -0.05935900 | -0.99783700 | C | -2.49899800 | -2.94817600 | 0.09464500  |
| C     | 4.24402500  | 1.76257200  | -2.57061000 | C | -1.58593500 | -1.90443500 | 0.25974400  |
| C     | 4.24464400  | -0.72217100 | -3.15071900 | B | -1.88297000 | -0.35974300 | 0.71944700  |
| C     | 4.96592700  | 0.62169400  | -3.29556600 | C | -3.45729900 | 0.05157300  | 0.45538600  |
| H     | 4.72823100  | 2.72060300  | -2.80047300 | C | -4.01681700 | -0.05861400 | -0.81725900 |
| H     | 3.21779800  | 1.83347600  | -2.95749200 | F | -3.26558300 | -0.50383800 | -1.83594000 |
| H     | 4.71432500  | -1.47353500 | -3.79892100 | C | -5.33068000 | 0.26261000  | -1.13023200 |
| H     | 3.21258000  | -0.60587900 | -3.51165800 | F | -5.79274700 | 0.12691400  | -2.37629900 |
| H     | 5.03015100  | 0.86923400  | -4.35966200 | C | -6.16724600 | 0.73273200  | -0.12908600 |
| H     | 6.00025300  | 0.53809900  | -2.94091400 | F | -7.43346800 | 1.05088900  | -0.39957700 |
| P     | 3.36935600  | -0.00984500 | -0.67571500 | C | -5.66659200 | 0.86602000  | 1.15522800  |
| C     | 3.29266100  | -2.53904100 | -1.69999200 | C | -4.34193400 | 0.52818800  | 1.42131500  |
| H     | 3.18610900  | -2.93939100 | -0.68628200 | F | -3.96549700 | 0.69792600  | 2.69726600  |
| H     | 2.29541200  | -2.30471900 | -2.08458300 | F | -6.45936800 | 1.31776700  | 2.13106300  |
| H     | 3.72082100  | -3.32736600 | -2.32933300 | C | -0.92673900 | 0.69326900  | -0.17318800 |
| C     | 5.60812800  | -1.74140500 | -1.26869900 | C | -0.45834000 | 1.90332900  | 0.34106600  |
| H     | 5.56563500  | -2.23035900 | -0.29236700 | F | -0.76968600 | 2.29993600  | 1.58541200  |
| H     | 6.00072900  | -2.47071200 | -1.98705800 | C | 0.38892400  | 2.77656600  | -0.34034400 |
| H     | 6.32284100  | -0.91815500 | -1.21148100 | F | 0.86516900  | 3.88043100  | 0.25475100  |
| C     | 3.26636300  | 2.70780300  | -0.44973800 | C | 0.78067500  | 2.47645200  | -1.63293200 |
| H     | 3.18385200  | 2.60637100  | 0.63787500  | F | 1.62388300  | 3.27847500  | -2.29673400 |
| H     | 3.68469000  | 3.69823900  | -0.66184900 | C | 0.34288500  | 1.29185800  | -2.20256900 |
| H     | 2.25928300  | 2.66703300  | -0.87451100 | C | -0.47554800 | 0.43422500  | -1.47316200 |
| C     | 5.57745600  | 1.78225000  | -0.41025600 | F | -0.75249500 | -0.71487200 | -2.09596500 |
| H     | 6.30193200  | 1.05899500  | -0.78912700 | F | 0.76952700  | 0.96227700  | -3.42762400 |
| H     | 5.95952200  | 2.78416900  | -0.63846300 | H | 5.28992000  | -2.21792500 | 0.12023800  |
| H     | 5.53009200  | 1.6241200   | 0.67764000  | H | 4.85777300  | -4.61605000 | -0.13644700 |
| C     | 0.02911300  | -0.27000800 | -0.98917800 | H | 2.55839900  | -5.51473100 | -0.25779900 |
| H     | 0.48698700  | 0.61858900  | -0.54199600 | H | -0.49661000 | -5.70426100 | -0.32125300 |
| H     | 0.34473500  | -1.26427900 | -0.67809900 | H | -2.88512400 | -5.04226600 | -0.23038400 |
| H     | -0.23405900 | -0.16159100 | -2.03746500 | H | -3.56105600 | -2.71648500 | 0.13457000  |
|       |             |             |             | C | 3.42429700  | 0.77398300  | 1.97277900  |
| P19_P |             |             |             | C | 4.44638400  | 0.93733000  | -0.89037100 |
| C     | 3.19437900  | -1.66671900 | 0.16929700  | H | 1.99383300  | 0.54501900  | -0.16881500 |
| C     | 4.26596600  | -2.57109500 | 0.07510400  | C | 3.55291100  | 2.30818000  | 1.85673500  |
| C     | 4.01630100  | -3.93592500 | -0.06583000 | C | 4.37805800  | 2.44604600  | -0.55091200 |
| C     | 2.71533500  | -4.44869900 | -0.12812300 | C | 4.65160400  | 2.80678200  | 0.91260800  |
| C     | 1.63295700  | -3.58133600 | -0.01421100 | H | 3.72373100  | 2.68719500  | 2.87178700  |

|        |             |             |             |   |             |             |             |
|--------|-------------|-------------|-------------|---|-------------|-------------|-------------|
| H      | 2.59064700  | 2.72492600  | 1.52938100  | C | 4.17825000  | -0.88089100 | -1.51163400 |
| H      | 5.10393000  | 2.94209100  | -1.20687200 | F | 4.39081800  | 0.43005100  | -1.68820200 |
| H      | 3.39311300  | 2.83788200  | -0.83642500 | C | 5.07858500  | -1.72382600 | -2.15557100 |
| H      | 4.70356500  | 3.89620300  | 0.99238900  | F | 6.07867600  | -1.22083400 | -2.87953300 |
| H      | 5.63408000  | 2.43322700  | 1.22578300  | C | 4.92918400  | -3.09725900 | -2.05104500 |
| P      | 3.26134200  | 0.12168300  | 0.25942600  | F | 5.77861000  | -3.91679900 | -2.66610600 |
| C      | 3.96061000  | 0.69284200  | -2.32630600 | C | 3.87751400  | -3.60856100 | -1.30448300 |
| H      | 3.90506600  | -0.37587300 | -2.55557700 | C | 3.00512600  | -2.73111200 | -0.67726100 |
| H      | 2.98491200  | 1.14288200  | -2.52061400 | F | 1.99502300  | -3.29466900 | 0.00946400  |
| H      | 4.67940500  | 1.14840400  | -3.01541700 | F | 3.71219800  | -4.92809500 | -1.20207100 |
| C      | 5.87463600  | 0.39353000  | -0.74775300 | C | 2.35155700  | 1.18832500  | 0.05507300  |
| H      | 5.94741100  | -0.62023200 | -1.14774100 | C | 1.54021900  | 2.23424200  | -0.36666200 |
| H      | 6.53994300  | 1.02828100  | -1.34209800 | F | 0.37049300  | 2.00446400  | -1.00068700 |
| H      | 6.24795600  | 0.39203800  | 0.27841800  | C | 1.84633900  | 3.57910900  | -0.18096700 |
| C      | 2.13020300  | 0.40475600  | 2.71204200  | F | 1.00130300  | 4.52993100  | -0.59634900 |
| H      | 1.99154600  | -0.67944100 | 2.77088100  | C | 3.03325600  | 3.93028500  | 0.43622200  |
| H      | 2.19076900  | 0.79465300  | 3.73335000  | F | 3.34912900  | 5.21092300  | 0.61742300  |
| H      | 1.24279700  | 0.83626100  | 2.23895700  | C | 3.89595100  | 2.92570000  | 0.85736400  |
| C      | 4.62577300  | 0.14025200  | 2.68491300  | C | 3.53768100  | 1.60182700  | 0.66364700  |
| H      | 5.58595200  | 0.44859900  | 2.26527700  | F | 4.41632700  | 0.67816900  | 1.07987900  |
| H      | 4.60798700  | 0.45615700  | 3.73266300  | F | 5.04928900  | 3.24610600  | 1.44336300  |
| H      | 4.56964300  | -0.95251600 | 2.66488500  | C | -2.58013800 | 1.51104500  | -0.46776700 |
| C      | -1.47566100 | -0.36153100 | 2.30659900  | C | -2.48761900 | 1.75094900  | -1.86087900 |
| H      | -1.59466700 | 0.59037700  | 2.82290300  | C | -2.65425300 | 0.66008800  | -2.89347000 |
| H      | -2.09145700 | -1.09588400 | 2.83792000  | C | -2.22570500 | 3.04024600  | -2.31350900 |
| H      | -0.43492000 | -0.68740100 | 2.42830400  | C | -2.01004200 | 4.09939300  | -1.43627000 |
|        |             |             |             | C | -1.64685100 | 5.46500000  | -1.95213300 |
| P20_TS |             |             |             | C | -2.10489900 | 3.84253000  | -0.07361800 |
| P      | -2.69088200 | -0.26393700 | -0.02891500 | C | -2.39134000 | 2.57476600  | 0.43738100  |
| C      | -2.75250800 | -0.61122900 | 1.76497900  | C | -2.45823600 | 2.44199000  | 1.93986800  |
| C      | -3.79065200 | -1.12472400 | 2.54685200  | C | -4.25822600 | -0.95716600 | -0.66044400 |
| C      | -3.51313900 | -1.64614400 | 3.81997700  | C | -4.20220200 | -2.23579200 | -1.25394100 |
| C      | -2.21254500 | -1.75120600 | 4.32208500  | C | -2.91692300 | -3.02607000 | -1.32853000 |
| C      | -1.14977400 | -1.27503500 | 3.54890600  | C | -5.36915200 | -2.78765700 | -1.77393800 |
| C      | -1.49651500 | -0.66329700 | 2.34191000  | C | -6.58891000 | -2.11184700 | -1.71960600 |
| O      | -0.41731400 | -0.26657800 | 1.63863000  | C | -7.82902900 | -2.72968400 | -2.30979400 |
| C      | 0.68185100  | -0.80406900 | 2.27083700  | C | -6.62455400 | -0.86335700 | -1.10642900 |
| C      | 0.31534500  | -1.36287100 | 3.50346300  | C | -5.48119600 | -0.26714500 | -0.56874900 |
| C      | 1.33104300  | -1.96232800 | 4.25179200  | C | -5.61404300 | 1.08543100  | 0.08757200  |
| C      | 2.60596600  | -2.00119800 | 3.69291300  | H | -4.80298400 | -1.15973900 | 2.15356700  |
| C      | 2.87463900  | -1.50956400 | 2.40446200  | H | -4.33545100 | -2.03256000 | 4.41265100  |
| C      | 1.89598000  | -0.89606600 | 1.61307600  | H | -2.03804200 | -2.23701400 | 5.27654200  |
| B      | 2.02339900  | -0.42026700 | 0.04587400  | H | 1.13262900  | -2.41377900 | 5.21826600  |
| C      | 3.11412900  | -1.34098500 | -0.73985600 | H | 3.40997700  | -2.47110200 | 4.25029100  |

|       |             |             |             |   |             |             |             |
|-------|-------------|-------------|-------------|---|-------------|-------------|-------------|
| H     | 3.87161700  | -1.64313300 | 1.99335000  | B | 2.52101100  | -0.67813800 | -0.43647300 |
| H     | -2.38444000 | 1.03691000  | -3.88139100 | C | 4.11843400  | -0.49725000 | -0.81594800 |
| H     | -2.00842200 | -0.20195100 | -2.68451200 | C | 4.79257100  | 0.69326900  | -1.07592500 |
| H     | -3.68281800 | 0.28916400  | -2.93934900 | F | 4.17071200  | 1.88256100  | -0.99326900 |
| H     | -2.16049900 | 3.21473300  | -3.38509300 | C | 6.13075900  | 0.76383300  | -1.45200100 |
| H     | -1.79769000 | 6.23077100  | -1.18838300 | F | 6.70921700  | 1.94529200  | -1.68569000 |
| H     | -0.59179700 | 5.48604900  | -2.24031600 | C | 6.86727500  | -0.40004200 | -1.59291400 |
| H     | -2.24115100 | 5.72862200  | -2.83081900 | F | 8.15070300  | -0.35243300 | -1.95350900 |
| H     | -1.94369900 | 4.65728600  | 0.62820600  | C | 6.24640800  | -1.61690400 | -1.35706100 |
| H     | -2.53314200 | 3.43318400  | 2.39110700  | C | 4.90777800  | -1.63631000 | -0.98775500 |
| H     | -1.55590400 | 1.96671300  | 2.33710800  | F | 4.38325700  | -2.85901200 | -0.78680000 |
| H     | -3.31394400 | 1.85327500  | 2.27555500  | F | 6.93683700  | -2.75291400 | -1.49307500 |
| H     | -3.10043700 | -4.01249200 | -1.75792100 | C | 1.80212100  | 0.78087000  | -0.10493000 |
| H     | -2.47439200 | -3.16773800 | -0.33672300 | C | 0.71498000  | 1.34297800  | -0.76201700 |
| H     | -2.16752400 | -2.52268200 | -1.94913200 | F | 0.06468600  | 0.69771200  | -1.76031700 |
| H     | -5.32653600 | -3.77382500 | -2.23087500 | C | 0.20030700  | 2.60224300  | -0.46710900 |
| H     | -7.74825700 | -2.79413000 | -3.39928400 | F | -0.79680600 | 3.11701200  | -1.19684400 |
| H     | -8.71821300 | -2.14304100 | -2.07106300 | C | 0.70712000  | 3.32150900  | 0.59945900  |
| H     | -7.97722500 | -3.74542700 | -1.93287900 | F | 0.18103400  | 4.50915900  | 0.92412200  |
| H     | -7.57151400 | -0.33319300 | -1.03677800 | C | 1.76337700  | 2.78772200  | 1.32597100  |
| H     | -6.66313600 | 1.29560400  | 0.30491200  | C | 2.28495300  | 1.55733800  | 0.95028200  |
| H     | -5.05652800 | 1.13620800  | 1.02783800  | F | 3.34931500  | 1.13116800  | 1.64359200  |
| H     | -5.23038400 | 1.88303200  | -0.55604300 | F | 2.27201700  | 3.47160800  | 2.35391400  |
| H     | -0.93344900 | -0.68110200 | -0.59701700 | C | -2.86375800 | 1.29717600  | 0.07001300  |
| C     | 0.48531500  | -0.78445300 | -0.78789900 | C | -3.42522500 | 2.05779600  | -0.97945300 |
| H     | 0.05277400  | 0.12764200  | -0.36953700 | C | -3.74935500 | 1.49548900  | -2.34526800 |
| H     | 0.59650900  | -0.76621300 | -1.86867500 | C | -3.62543400 | 3.42178700  | -0.77673000 |
| H     | 0.28515000  | -1.76462000 | -0.35643300 | C | -3.22268200 | 4.05710400  | 0.39264300  |
|       |             |             |             | C | -3.34972400 | 5.54501600  | 0.56309200  |
| P20_P |             |             |             | C | -2.59898800 | 3.29378700  | 1.37813100  |
| P     | -2.76349700 | -0.49153700 | -0.19077800 | C | -2.39848000 | 1.92268600  | 1.24989400  |
| C     | -2.42898200 | -1.53092000 | 1.22844600  | C | -1.60318700 | 1.22854200  | 2.32980700  |
| C     | -3.40950500 | -2.08983300 | 2.06130200  | C | -4.26684600 | -1.15856100 | -0.93865400 |
| C     | -3.03235800 | -2.85720500 | 3.16289000  | C | -4.12317700 | -2.12222200 | -1.95979800 |
| C     | -1.68756000 | -3.09975700 | 3.46154300  | C | -2.77695500 | -2.61170400 | -2.44075100 |
| C     | -0.69896000 | -2.58349300 | 2.62821100  | C | -5.27680700 | -2.64151500 | -2.53960200 |
| C     | -1.10480400 | -1.82031700 | 1.51982100  | C | -6.55140300 | -2.24972800 | -2.12918600 |
| O     | -0.07118400 | -1.36392900 | 0.79837200  | C | -7.77653300 | -2.85195800 | -2.76314000 |
| C     | 1.08647300  | -1.83193400 | 1.42720000  | C | -6.65839300 | -1.31895400 | -1.09917300 |
| C     | 0.75221000  | -2.57717500 | 2.56562600  | C | -5.53776800 | -0.75828600 | -0.48443800 |
| C     | 1.78724500  | -3.09583500 | 3.34776300  | C | -5.76473600 | 0.26670500  | 0.60448100  |
| C     | 3.08458400  | -2.81809200 | 2.94167100  | H | -4.46133500 | -1.93919200 | 1.84121200  |
| C     | 3.35161600  | -2.06575200 | 1.78520300  | H | -3.80336300 | -3.27796300 | 3.79844800  |
| C     | 2.35656100  | -1.54702500 | 0.94846500  | H | -1.42165200 | -3.68995300 | 4.33253900  |

|        |             |             |             |   |             |             |             |
|--------|-------------|-------------|-------------|---|-------------|-------------|-------------|
| H      | 1.58424700  | -3.68116400 | 4.23849000  | C | -2.29933800 | 4.79146400  | -0.15801900 |
| H      | 3.91711300  | -3.18958300 | 3.53064800  | C | -1.10951400 | 4.14493000  | 0.17336200  |
| H      | 4.39033700  | -1.87228400 | 1.53316900  | C | 0.15253000  | 4.82729500  | 0.69310800  |
| H      | -3.75508400 | 2.30859600  | -3.07280400 | C | 0.18766400  | 6.31831200  | 0.36470000  |
| H      | -2.99247000 | 0.77736500  | -2.67899500 | C | 0.19551800  | 4.64236100  | 2.22737000  |
| H      | -4.72407600 | 1.00031900  | -2.38229700 | B | -1.92553600 | 0.38454000  | -0.63138000 |
| H      | -4.05064600 | 4.01143200  | -1.58476100 | C | -1.33762800 | -0.53715600 | 0.58026400  |
| H      | -3.76703700 | 5.79726900  | 1.54128600  | C | -1.11207600 | -1.88828900 | 0.32199100  |
| H      | -2.35660700 | 6.00097300  | 0.49985900  | F | -1.21267200 | -2.34139500 | -0.94452900 |
| H      | -3.98040900 | 5.98680900  | -0.21037400 | C | -0.76882000 | -2.81626400 | 1.29045200  |
| H      | -2.21520300 | 3.79138600  | 2.26466400  | F | -0.52323300 | -4.09066200 | 0.97296100  |
| H      | -1.26283200 | 1.96767400  | 3.05663800  | C | -0.61041800 | -2.39090400 | 2.60106100  |
| H      | -0.71003900 | 0.75386800  | 1.90622200  | F | -0.23003600 | -3.25307900 | 3.54400400  |
| H      | -2.17854800 | 0.46888700  | 2.86541100  | C | -0.81499700 | -1.05748700 | 2.91141500  |
| H      | -2.90803600 | -3.43324500 | -3.14583500 | C | -1.19349300 | -0.16617400 | 1.91239200  |
| H      | -2.15567400 | -2.98165700 | -1.61814000 | F | -1.40606100 | 1.09480800  | 2.31398600  |
| H      | -2.21098400 | -1.82672700 | -2.95489800 | F | -0.61247500 | -0.63063400 | 4.15906700  |
| H      | -5.17724000 | -3.37958700 | -3.33146300 | C | -3.33530700 | -0.36447700 | -1.02733200 |
| H      | -7.65754600 | -2.93441500 | -3.84610400 | C | -4.34515100 | -0.33497400 | -0.06325100 |
| H      | -8.66579500 | -2.25324100 | -2.55752300 | F | -4.13941800 | 0.32412400  | 1.08698100  |
| H      | -7.95233900 | -3.85980200 | -2.37414600 | C | -5.57672000 | -0.95674400 | -0.20800100 |
| H      | -7.64506300 | -1.01499000 | -0.75857600 | F | -6.50124500 | -0.87767600 | 0.74893400  |
| H      | -6.74699100 | 0.11147900  | 1.05510300  | C | -5.83864900 | -1.67503600 | -1.36677100 |
| H      | -5.01947700 | 0.22143400  | 1.40283600  | F | -7.01115900 | -2.28300100 | -1.53234300 |
| H      | -5.73374700 | 1.28435000  | 0.20107500  | C | -4.86321500 | -1.75477500 | -2.34660400 |
| H      | -1.69892800 | -0.72516600 | -1.06955300 | C | -3.64207300 | -1.11419700 | -2.15763600 |
| C      | 1.81542300  | -1.46594800 | -1.68707300 | F | -2.75236500 | -1.27128500 | -3.15292900 |
| H      | 1.87978700  | -0.88788600 | -2.61556800 | F | -5.09637600 | -2.44925200 | -3.46117400 |
| H      | 2.32147900  | -2.42041000 | -1.85908100 | C | 3.34859200  | -0.49930500 | -1.58810300 |
| H      | 0.75483300  | -1.68554900 | -1.51746500 | C | 3.19544500  | -0.80578700 | -2.95382400 |
| P21_TS |             |             |             | C | 1.88251500  | -0.64452800 | -3.67207400 |
| P      | 1.88880400  | 0.08115700  | -0.60344300 | C | 4.28017600  | -1.29905300 | -3.67730800 |
| C      | 2.27621700  | 1.86475400  | -0.41883300 | C | 5.52648200  | -1.49545000 | -3.09089300 |
| C      | 3.47364700  | 2.47407700  | -0.81226400 | C | 6.67711100  | -2.06695800 | -3.87556800 |
| C      | 3.60382100  | 3.85671300  | -0.75174500 | C | 5.67140800  | -1.15354500 | -1.75035700 |
| C      | 2.55117200  | 4.65188200  | -0.29717400 | C | 4.61688400  | -0.65916300 | -0.97981100 |
| C      | 1.34362800  | 4.08274600  | 0.09690700  | C | 4.94271100  | -0.32230000 | 0.45908500  |
| C      | 1.23702300  | 2.69401700  | 0.00396900  | C | 2.07713100  | -0.91711500 | 0.93974500  |
| O      | 0.08008600  | 2.07201100  | 0.35124500  | C | 2.20672200  | -0.40716600 | 2.24868700  |
| C      | -1.09684000 | 2.75689300  | 0.06462900  | C | 2.02318000  | 1.04357500  | 2.61465400  |
| C      | -2.15903000 | 1.96237300  | -0.35119400 | C | 2.48999700  | -1.29402100 | 3.28844200  |
| C      | -3.33058000 | 2.66200900  | -0.66089100 | C | 2.63673300  | -2.66405800 | 3.08774100  |
| C      | -3.40436200 | 4.04991900  | -0.56627900 | C | 2.90120900  | -3.59432000 | 4.24000000  |
|        |             |             |             | C | 2.44865300  | -3.15239100 | 1.79921100  |

|       |             |             |             |   |             |             |             |
|-------|-------------|-------------|-------------|---|-------------|-------------|-------------|
| C     | 2.15691500  | -2.31182200 | 0.72443900  | C | -2.40976900 | 1.88259100  | 0.25443900  |
| C     | 1.91133600  | -2.97440600 | -0.61327000 | C | -3.65293500 | 2.50822800  | 0.41230600  |
| H     | 4.29425300  | 1.87111500  | -1.18559800 | C | -3.75261300 | 3.87998200  | 0.24448500  |
| H     | 4.53331200  | 4.32076400  | -1.06337500 | C | -2.62121600 | 4.62443400  | -0.09766500 |
| H     | 2.68017100  | 5.72839900  | -0.25387200 | C | -1.37361200 | 4.03131700  | -0.26269300 |
| H     | -4.20257400 | 2.11323300  | -1.00589100 | C | -1.27768300 | 2.65028300  | -0.04938000 |
| H     | -4.32840800 | 4.56018600  | -0.81840600 | O | -0.10814900 | 1.99593600  | -0.16594200 |
| H     | -2.36867000 | 5.87262300  | -0.10036100 | C | 1.07992400  | 2.71540800  | 0.09241500  |
| H     | -0.66400900 | 6.82683300  | 0.82265500  | C | 2.16254000  | 1.95778800  | 0.53670400  |
| H     | 0.16064700  | 6.49345700  | -0.71481900 | C | 3.30982800  | 2.70527300  | 0.82500200  |
| H     | 1.08975200  | 6.78054100  | 0.77490700  | C | 3.35940200  | 4.08883600  | 0.67819300  |
| H     | -0.64968900 | 5.16418000  | 2.68599900  | C | 2.25346800  | 4.78288600  | 0.20333700  |
| H     | 0.12276800  | 3.58406500  | 2.49411700  | C | 1.08284900  | 4.09314500  | -0.11433500 |
| H     | 1.12771500  | 5.04669800  | 2.63496100  | C | -0.12899400 | 4.73933700  | -0.77660700 |
| H     | 2.00848800  | -0.81606000 | -4.74253900 | C | -0.19454600 | 6.24841400  | -0.54356200 |
| H     | 1.14497700  | -1.36644000 | -3.30617700 | C | -0.03249500 | 4.46486800  | -2.29560200 |
| H     | 1.46458200  | 0.35693300  | -3.54056300 | B | 2.02277900  | 0.36819200  | 0.88544600  |
| H     | 4.14194900  | -1.53487900 | -4.72971000 | C | 1.38582300  | -0.55389400 | -0.34565000 |
| H     | 7.63265600  | -1.67752600 | -3.51666200 | C | 1.15407100  | -1.91174500 | -0.11613400 |
| H     | 6.70663500  | -3.15694200 | -3.77622400 | F | 1.29222500  | -2.42124700 | 1.12437600  |
| H     | 6.58626200  | -1.83426000 | -4.93891600 | C | 0.80526000  | -2.82742000 | -1.09868700 |
| H     | 6.64467600  | -1.26964500 | -1.27851300 | F | 0.55915200  | -4.10832300 | -0.79267600 |
| H     | 6.01042000  | -0.10717300 | 0.54469500  | C | 0.65433400  | -2.39459900 | -2.40562600 |
| H     | 4.71122000  | -1.15875000 | 1.12637000  | F | 0.28586300  | -3.24943800 | -3.36485500 |
| H     | 4.39704200  | 0.54878100  | 0.82639400  | C | 0.85191600  | -1.05552500 | -2.69267400 |
| H     | 2.11039500  | 1.16320100  | 3.69604700  | C | 1.23004600  | -0.17956200 | -1.67972000 |
| H     | 1.02970900  | 1.39169700  | 2.31946500  | F | 1.44102900  | 1.08351600  | -2.08635200 |
| H     | 2.76512600  | 1.69498600  | 2.14285500  | F | 0.64027300  | -0.60905400 | -3.93592400 |
| H     | 2.58559900  | -0.89452000 | 4.29500300  | C | 3.51174500  | -0.31906200 | 1.07101500  |
| H     | 3.48487700  | -4.46217800 | 3.92416800  | C | 4.44288400  | -0.22719900 | 0.03600300  |
| H     | 1.95214200  | -3.95787000 | 4.64565100  | F | 4.13125200  | 0.45980700  | -1.07628800 |
| H     | 3.43877000  | -3.08771300 | 5.04469700  | C | 5.69828300  | -0.81708900 | 0.06374700  |
| H     | 2.50005400  | -4.22409400 | 1.62049500  | F | 6.54734900  | -0.68447200 | -0.95895900 |
| H     | 1.49972600  | -3.97207500 | -0.44999400 | C | 6.06658300  | -1.56784900 | 1.17199900  |
| H     | 1.18295100  | -2.42993200 | -1.22187500 | F | 7.26559500  | -2.14962800 | 1.22207000  |
| H     | 2.83401200  | -3.06910400 | -1.19421100 | C | 5.17210100  | -1.70981000 | 2.21953400  |
| H     | 0.16502700  | 0.17249900  | -1.21358800 | C | 3.92447000  | -1.09589400 | 2.14807300  |
| C     | -0.86396400 | 0.47283800  | -2.11343800 | F | 3.12033200  | -1.30990300 | 3.20141900  |
| H     | -1.81313400 | 0.79018600  | -2.56194600 | F | 5.51161300  | -2.44061900 | 3.28558900  |
| H     | -0.23746000 | 1.34741100  | -2.34066300 | C | -3.62909800 | -0.43265100 | 1.50455600  |
| H     | -0.59514700 | -0.39207100 | -2.71852600 | C | -3.45751000 | -0.53068700 | 2.90056900  |
|       |             |             |             | C | -2.17760500 | -0.13168400 | 3.59068800  |
| P21_P |             |             |             | C | -4.51554800 | -1.01391400 | 3.66631400  |
| P     | -2.22562300 | 0.11005200  | 0.49055000  | C | -5.73090800 | -1.38600500 | 3.09466400  |

|   |             |             |             |        |             |             |             |
|---|-------------|-------------|-------------|--------|-------------|-------------|-------------|
| C | -6.84211100 | -1.94273900 | 3.94338100  | H      | -1.48716500 | -3.90993900 | 0.62840400  |
| C | -5.88696300 | -1.23344000 | 1.71900800  | H      | -1.25358300 | -2.32175100 | 1.31946500  |
| C | -4.86057400 | -0.76167100 | 0.90088800  | H      | -2.88241500 | -3.02773000 | 1.28301100  |
| C | -5.14654800 | -0.62380600 | -0.57807100 | H      | -1.05127000 | -0.07234900 | 1.22729600  |
| C | -2.15522800 | -0.97547000 | -0.95711500 | C      | 1.12701700  | 0.32958200  | 2.26208100  |
| C | -2.22821700 | -0.52166800 | -2.28986600 | H      | 1.71578700  | 0.70699300  | 3.10426400  |
| C | -2.02905900 | 0.91636600  | -2.69803500 | H      | 0.26698300  | 1.00964200  | 2.18018800  |
| C | -2.43390500 | -1.46790300 | -3.29146400 | H      | 0.77187200  | -0.66620400 | 2.55034500  |
| C | -2.54905900 | -2.83096000 | -3.01948000 |        |             |             |             |
| C | -2.73862600 | -3.82404700 | -4.13209700 | P22_TS |             |             |             |
| C | -2.38653800 | -3.25585500 | -1.70359200 | P      | 2.02420900  | -1.27274700 | -1.40501100 |
| C | -2.17625600 | -2.35650700 | -0.65961100 | C      | 3.22930800  | 0.06782400  | -1.12522700 |
| C | -1.94714300 | -2.92462900 | 0.72337800  | C      | 4.45962900  | 0.24852800  | -1.76755500 |
| H | -4.52516700 | 1.92401500  | 0.68719600  | C      | 5.23519600  | 1.36674400  | -1.48134700 |
| H | -4.70879600 | 4.37351200  | 0.37527200  | C      | 4.80391400  | 2.30927800  | -0.54469400 |
| H | -2.72367800 | 5.69448400  | -0.24461400 | C      | 3.59547300  | 2.15365200  | 0.12863600  |
| H | 4.19026400  | 2.18420000  | 1.19144400  | C      | 2.83325500  | 1.02871000  | -0.19216000 |
| H | 4.26822200  | 4.62917400  | 0.92421600  | O      | 1.63008100  | 0.82750900  | 0.41802400  |
| H | 2.30695100  | 5.85813500  | 0.07366900  | C      | 0.87330600  | 1.96839500  | 0.67044900  |
| H | 0.69895900  | 6.73047600  | -0.94506300 | C      | -0.50220700 | 1.84729100  | 0.47528800  |
| H | -0.27211900 | 6.48854000  | 0.52086000  | C      | -1.24233700 | 2.98528800  | 0.81527700  |
| H | -1.04727900 | 6.68620800  | -1.06985900 | C      | -0.63139000 | 4.15925700  | 1.24773700  |
| H | 0.85056700  | 4.96686900  | -2.70163000 | C      | 0.75393700  | 4.23918900  | 1.35653200  |
| H | 0.07580600  | 3.39369600  | -2.49001100 | C      | 1.53977400  | 3.12268100  | 1.07624800  |
| H | -0.92455800 | 4.83534000  | -2.81219100 | C      | 3.05803400  | 3.05258600  | 1.23862700  |
| H | -2.31026100 | -0.15377700 | 4.67313600  | C      | 3.36620100  | 2.36734300  | 2.58953300  |
| H | -1.34960100 | -0.80569500 | 3.34658200  | C      | 3.70663400  | 4.43550800  | 1.21637400  |
| H | -1.86098800 | 0.87976800  | 3.31546600  | B      | -1.11613100 | 0.48105800  | -0.15058700 |
| H | -4.38556500 | -1.09576400 | 4.74250200  | C      | -0.76113600 | -0.84605600 | 0.73252800  |
| H | -7.81713500 | -1.77734600 | 3.48036900  | C      | -0.62888400 | -0.79433200 | 2.11940200  |
| H | -6.71546400 | -3.02207100 | 4.07643500  | F      | -0.71135900 | 0.36868200  | 2.77473100  |
| H | -6.84731600 | -1.48715200 | 4.93617900  | C      | -0.44224000 | -1.92038700 | 2.91488000  |
| H | -6.84121300 | -1.48429800 | 1.26206500  | F      | -0.32419700 | -1.80522100 | 4.23690400  |
| H | -6.22403900 | -0.53779400 | -0.73286700 | C      | -0.36796600 | -3.17303300 | 2.32521200  |
| H | -4.79010900 | -1.49339100 | -1.14006900 | F      | -0.15658900 | -4.25824900 | 3.06542700  |
| H | -4.67801300 | 0.26114700  | -1.01853900 | C      | -0.50812700 | -3.27706500 | 0.94998500  |
| H | -2.00518200 | 0.98746900  | -3.78641100 | C      | -0.71785400 | -2.12951200 | 0.20103600  |
| H | -1.07072400 | 1.28763500  | -2.32053000 | F      | -0.89872600 | -2.31760400 | -1.12321700 |
| H | -2.82012100 | 1.57783100  | -2.33110500 | F      | -0.40651700 | -4.46857200 | 0.35175100  |
| H | -2.48213400 | -1.12742500 | -4.32244600 | C      | -2.74557200 | 0.55955700  | -0.42088500 |
| H | -3.26885000 | -4.71351600 | -3.78485300 | C      | -3.68916500 | -0.34148400 | 0.08480100  |
| H | -1.76031500 | -4.13928300 | -4.50696800 | F      | -3.34437900 | -1.38110600 | 0.85800100  |
| H | -3.29443600 | -3.38739400 | -4.96473600 | C      | -5.05912500 | -0.25003700 | -0.14818000 |
| H | -2.39115200 | -4.31995200 | -1.48069500 | F      | -5.88661800 | -1.15590300 | 0.37064900  |

|   |             |             |             |       |             |             |             |
|---|-------------|-------------|-------------|-------|-------------|-------------|-------------|
| C | -5.56484500 | 0.78265500  | -0.91679000 | P22_P |             |             |             |
| F | -6.86970900 | 0.88344200  | -1.14779500 | P     | 2.58510400  | 1.21842200  | 1.30993700  |
| C | -4.68196000 | 1.71608000  | -1.43692400 | C     | 3.36824100  | -0.37177300 | 1.08621200  |
| C | -3.32565600 | 1.58755500  | -1.17529300 | C     | 4.62185700  | -0.67692000 | 1.63032200  |
| F | -2.56036300 | 2.56025800  | -1.70956500 | C     | 5.20535400  | -1.90321400 | 1.35457600  |
| F | -5.13749300 | 2.72935500  | -2.17217700 | C     | 4.56521700  | -2.79974500 | 0.49385000  |
| C | 2.34398700  | -1.87389800 | -3.12765700 | C     | 3.33430600  | -2.51186900 | -0.08601600 |
| C | 2.07643900  | -0.77683900 | -4.16209500 | C     | 2.71857800  | -1.30209900 | 0.26153500  |
| C | 1.47483400  | -3.10835800 | -3.39369800 | O     | 1.49917100  | -0.97275000 | -0.21427100 |
| C | 2.58463500  | -2.65761800 | -0.29319400 | C     | 0.60333500  | -2.02741200 | -0.50957700 |
| C | 3.89692200  | -3.29660600 | -0.74993900 | C     | -0.75675400 | -1.76448700 | -0.32624100 |
| C | 2.71029600  | -2.13631000 | 1.14169000  | C     | -1.59526000 | -2.81885100 | -0.71138000 |
| H | 4.80169000  | -0.47252600 | -2.50542400 | C     | -1.11178100 | -4.03973300 | -1.16765600 |
| H | 6.18394200  | 1.50926100  | -1.98727100 | C     | 0.25663200  | -4.25615400 | -1.27773100 |
| H | 5.42814900  | 3.17268100  | -0.33843900 | C     | 1.14615700  | -3.23153000 | -0.96172100 |
| H | -2.32469500 | 2.95930600  | 0.73721300  | C     | 2.65407800  | -3.33239700 | -1.17245800 |
| H | -1.23879100 | 5.02443600  | 1.49301100  | C     | 2.99247400  | -2.66576100 | -2.52661100 |
| H | 1.21560400  | 5.16933600  | 1.67086900  | C     | 3.15085400  | -4.77787100 | -1.19008300 |
| H | 2.96362800  | 2.96923100  | 3.40954200  | B     | -1.29322500 | -0.37162400 | 0.37137100  |
| H | 4.44744400  | 2.26038400  | 2.72357200  | C     | -0.79775000 | 0.91617500  | -0.56302100 |
| H | 2.90710300  | 1.37573800  | 2.63617200  | C     | -0.80748100 | 0.83190900  | -1.95924900 |
| H | 3.32884100  | 5.04565400  | 2.04011500  | F     | -1.22773500 | -0.28372500 | -2.56462100 |
| H | 4.78833100  | 4.35463200  | 1.35443200  | C     | -0.44487500 | 1.86891500  | -2.81125800 |
| H | 3.50860900  | 4.95716900  | 0.27540900  | F     | -0.47798300 | 1.70900200  | -4.13467000 |
| H | 3.40129100  | -2.16115800 | -3.18338100 | C     | -0.04250700 | 3.08627100  | -2.27921600 |
| H | 2.34890400  | -1.13832800 | -5.15821400 | F     | 0.35832800  | 4.07960200  | -3.07297700 |
| H | 2.65299200  | 0.13019700  | -3.95990800 | C     | -0.04189600 | 3.23702100  | -0.90436400 |
| H | 1.01638400  | -0.50894300 | -4.18395900 | C     | -0.43043700 | 2.17288600  | -0.09781200 |
| H | 1.63624300  | -3.46310900 | -4.41587900 | F     | -0.39805600 | 2.44772500  | 1.23218900  |
| H | 0.41335900  | -2.86767600 | -3.27999400 | F     | 0.39274000  | 4.38099900  | -0.35115800 |
| H | 1.70221400  | -3.93319200 | -2.71197800 | C     | -2.95052500 | -0.34298200 | 0.48378000  |
| H | 1.77757100  | -3.39947800 | -0.33951700 | C     | -3.80235200 | 0.63021100  | -0.03923500 |
| H | 4.21271900  | -4.04191100 | -0.01324500 | F     | -3.34006400 | 1.64927400  | -0.78652900 |
| H | 3.81000400  | -3.80162500 | -1.71534300 | C     | -5.18036200 | 0.65279900  | 0.15936400  |
| H | 4.68981000  | -2.54336600 | -0.81931100 | F     | -5.92388600 | 1.62726700  | -0.37011800 |
| H | 2.83707400  | -2.97674000 | 1.83090000  | C     | -5.78352500 | -0.33728000 | 0.91444300  |
| H | 3.58799700  | -1.48715900 | 1.23140200  | F     | -7.10108400 | -0.33226500 | 1.11564400  |
| H | 1.83580800  | -1.55995100 | 1.44967300  | C     | -4.99065400 | -1.33692600 | 1.45544900  |
| H | 0.47799800  | -0.37589800 | -1.26392300 | C     | -3.62021100 | -1.31497000 | 1.23431100  |
| C | -0.39422700 | 0.48796400  | -1.88467400 | F     | -2.94267800 | -2.33567600 | 1.79062800  |
| H | 0.54149100  | 0.97123500  | -2.20278300 | F     | -5.54883800 | -2.30613800 | 2.18471200  |
| H | -0.71607300 | -0.26009100 | -2.61472600 | C     | 2.90248600  | 1.91725400  | 2.96592100  |
| H | -1.06972100 | 1.33468700  | -2.00104800 | C     | 2.33510300  | 0.96589100  | 4.02677500  |
|   |             |             |             | C     | 2.26779500  | 3.31289400  | 3.04309500  |

|        |             |             |             |   |             |             |             |
|--------|-------------|-------------|-------------|---|-------------|-------------|-------------|
| C      | 3.10758200  | 2.36251400  | -0.01945500 | C | -4.47892200 | -1.05061200 | -1.38091000 |
| C      | 4.55520600  | 2.81046400  | 0.20009700  | H | -4.27132000 | -2.09867200 | -1.57942900 |
| C      | 2.92356300  | 1.67395300  | -1.37811500 | C | -5.47143900 | -0.38906800 | -2.09514000 |
| H      | 5.12698700  | 0.03751100  | 2.27517100  | H | -6.02641700 | -0.91764500 | -2.86309400 |
| H      | 6.16571800  | -2.15897800 | 1.78742300  | C | -5.74677700 | 0.95251300  | -1.83180100 |
| H      | 5.05435100  | -3.73928400 | 0.25994600  | H | -6.51340300 | 1.46855100  | -2.40049400 |
| H      | -2.66927100 | -2.67869500 | -0.64861400 | C | -5.04640400 | 1.62964800  | -0.83841800 |
| H      | -1.80507100 | -4.82988000 | -1.43847800 | H | -5.25864600 | 2.67378500  | -0.63006500 |
| H      | 0.62507300  | -5.21476300 | -1.62543400 | C | -4.06288800 | 0.96598200  | -0.10994200 |
| H      | 2.49299900  | -3.20624400 | -3.33557800 | H | -3.51628500 | 1.49077100  | 0.67001700  |
| H      | 4.07331600  | -2.67649300 | -2.70287500 | C | -2.96597200 | -2.76907800 | 1.09609300  |
| H      | 2.64181300  | -1.62947300 | -2.54640800 | C | -4.31390000 | -3.02342000 | 1.36401100  |
| H      | 2.68159300  | -5.32921700 | -2.00722100 | H | -5.06210800 | -2.26155300 | 1.16422300  |
| H      | 4.22911100  | -4.81444600 | -1.36862300 | C | -4.69824200 | -4.25785500 | 1.88017400  |
| H      | 2.92782600  | -5.29113000 | -0.25029300 | H | -5.74645200 | -4.45321900 | 2.08179600  |
| H      | 3.99082300  | 1.99786900  | 3.07967600  | C | -3.74360300 | -5.23842300 | 2.13565400  |
| H      | 2.52727500  | 1.37954000  | 5.02013100  | H | -4.04812900 | -6.20023500 | 2.53523600  |
| H      | 2.79017300  | -0.02638000 | 3.97173300  | C | -2.39796700 | -4.98505300 | 1.87730100  |
| H      | 1.25326500  | 0.85240100  | 3.90552600  | H | -1.65134700 | -5.74768600 | 2.07274300  |
| H      | 2.37923600  | 3.70033600  | 4.05887500  | C | -2.00610300 | -3.75435300 | 1.36216800  |
| H      | 1.20051600  | 3.27024600  | 2.80738100  | H | -0.95589000 | -3.55968800 | 1.15098900  |
| H      | 2.73968500  | 4.02339900  | 2.35892900  | B | 0.23993700  | 0.40673700  | 0.79728600  |
| H      | 2.42566400  | 3.21877300  | 0.05630300  | C | 1.33960000  | -1.10516400 | -1.09813500 |
| H      | 4.86045900  | 3.45472900  | -0.62821800 | F | 1.30180600  | -3.38272000 | -0.45816200 |
| H      | 4.68587200  | 3.37338800  | 1.12864800  | C | 1.91281800  | -2.37541400 | -1.08889000 |
| H      | 5.22953800  | 1.94725300  | 0.21553800  | F | 3.64208000  | -3.87124500 | -1.67923600 |
| H      | 3.05838300  | 2.41249800  | -2.17314700 | C | 3.12557900  | -2.64578500 | -1.70805300 |
| H      | 3.67189100  | 0.88512200  | -1.50861900 | F | 4.96347800  | -1.87057600 | -2.95674100 |
| H      | 1.93185700  | 1.22636400  | -1.48472900 | C | 3.80486500  | -1.62372000 | -2.35711400 |
| H      | 1.21356200  | 1.00883700  | 1.21569500  | F | 3.91852400  | 0.63916100  | -2.99475500 |
| C      | -0.71542900 | -0.35805600 | 1.91808600  | C | 3.26705800  | -0.34342400 | -2.38012400 |
| H      | 0.35726600  | -0.58999900 | 1.97742200  | F | 1.58772800  | 1.14842200  | -1.75688700 |
| H      | -0.90021000 | 0.57677500  | 2.45748200  | C | 2.05300800  | -0.10294700 | -1.75383300 |
| H      | -1.20230300 | -1.15561700 | 2.48302200  | C | -0.60400900 | 1.73422800  | 0.36782300  |
| P23_TS |             |             |             | F | -1.05114500 | 1.07437700  | -1.88645700 |
| C      | -1.20233900 | -2.50410500 | -1.71108300 | C | -1.17792500 | 1.95320400  | -0.88445700 |
| H      | -0.32786500 | -2.55867200 | -2.36077500 | F | -2.53854000 | 3.17981900  | -2.37810400 |
| H      | -2.05235200 | -2.19237300 | -2.32768200 | C | -1.96074500 | 3.06565000  | -1.18351800 |
| H      | -1.41663600 | -3.50739000 | -1.32958300 | F | -2.97020400 | 5.07213100  | -0.47528100 |
| C      | -1.00789700 | -1.51470900 | -0.59463700 | C | -2.19279600 | 4.2470400   | -0.21415600 |
| C      | 0.10813700  | -0.80962300 | -0.31099300 | F | -1.79420000 | 4.80750200  | 1.97297300  |
| P      | -2.38690800 | -1.14317500 | 0.51576100  | C | -1.61088800 | 3.87608200  | 1.03902400  |
| C      | -3.75676600 | -0.36824800 | -0.39352100 | F | -0.25226200 | 2.70370800  | 2.50058100  |
|        |             |             |             | C | -0.82988000 | 2.75864800  | 1.29059500  |



|       |             |             |             |        |             |             |             |
|-------|-------------|-------------|-------------|--------|-------------|-------------|-------------|
| C     | 1.81462900  | 0.66697700  | 1.12995100  | H      | 1.89806900  | -4.36677100 | -3.48879700 |
| F     | 1.87005700  | 2.96107200  | 0.50601300  | C      | 2.24380000  | -2.80236500 | -2.06049800 |
| C     | 2.49639400  | 1.86619600  | 0.94920000  | H      | 1.26637000  | -2.89531800 | -1.59267000 |
| F     | 4.46446000  | 3.17625200  | 0.98493300  | B      | -0.30446900 | 0.46857200  | -0.81127500 |
| C     | 3.86272100  | 2.00482600  | 1.18016200  | C      | -1.15409400 | -1.28812900 | 1.03852600  |
| F     | 5.90581800  | 1.03397200  | 1.83792500  | F      | -0.93422800 | -3.45312700 | 0.11474200  |
| C     | 4.60163000  | 0.91555300  | 1.61233200  | C      | -1.61154100 | -2.59233800 | 0.88250700  |
| F     | 4.66611800  | -1.36389200 | 2.20968500  | F      | -3.18083700 | -4.29942200 | 1.32707600  |
| C     | 3.96709400  | -0.30533500 | 1.80363800  | C      | -2.77381400 | -3.04360700 | 1.49345100  |
| F     | 2.04754400  | -1.61153000 | 1.73316800  | F      | -4.61568800 | -2.59765600 | 2.88763600  |
| C     | 2.60553000  | -0.39702700 | 1.56388800  | C      | -3.50805900 | -2.17501900 | 2.28944200  |
| H     | -1.30039300 | -0.26456200 | 1.53829200  | F      | -3.77830100 | -0.03372400 | 3.23136700  |
| C     | -0.36293500 | -0.11199600 | 2.51292600  | C      | -3.07804700 | -0.86476400 | 2.46573900  |
| H     | 0.34859000  | 0.57038700  | 2.97291300  | F      | -1.53449800 | 0.82693900  | 1.99975400  |
| H     | -1.29467900 | 0.11644800  | 3.04933700  | C      | -1.91531400 | -0.44092800 | 1.84113800  |
| H     | -0.07808800 | -1.14548900 | 2.71452700  | C      | 0.34617000  | 1.92247100  | -0.37875900 |
| P23_P |             |             |             | F      | 1.36088600  | 1.26909300  | 1.68286200  |
| C     | 1.45813200  | -2.51800100 | 1.50866200  | C      | 1.11763500  | 2.20831400  | 0.74025400  |
| H     | 0.62044600  | -2.64265900 | 2.19585200  | F      | 2.54408700  | 3.58034300  | 2.03505200  |
| H     | 2.35500700  | -2.34327700 | 2.11025300  | C      | 1.74807200  | 3.42851400  | 0.96823800  |
| H     | 1.59286400  | -3.46149400 | 0.96717100  | F      | 2.17293000  | 5.63962200  | 0.26717600  |
| C     | 1.19661500  | -1.36927800 | 0.55905300  | C      | 1.57685900  | 4.46589400  | 0.07019600  |
| C     | 0.02212400  | -0.75351600 | 0.29548200  | F      | 0.58044200  | 5.24589900  | -1.91382800 |
| P     | 2.67865900  | -0.76334000 | -0.23859700 | C      | 0.77380400  | 4.25538100  | -1.04376400 |
| C     | 4.08041700  | -0.64221500 | 0.89375700  | F      | -0.58621400 | 2.89626700  | -2.32435900 |
| C     | 4.91311000  | -1.74632900 | 1.11150600  | C      | 0.19144400  | 3.01228700  | -1.24019600 |
| H     | 4.74189800  | -2.67537400 | 0.57432500  | C      | -1.94563200 | 0.56187700  | -0.96099600 |
| C     | 5.96599300  | -1.64760700 | 2.01362300  | F      | -2.25101500 | 2.74149200  | -0.04914100 |
| H     | 6.61096400  | -2.50272700 | 2.18510600  | C      | -2.76090800 | 1.63070800  | -0.60028200 |
| C     | 6.19220600  | -0.45151600 | 2.69202600  | F      | -4.86772700 | 2.68810800  | -0.38527800 |
| H     | 7.01668600  | -0.37643000 | 3.39349200  | C      | -4.14561700 | 1.62763600  | -0.74829000 |
| C     | 5.36596600  | 0.64706000  | 2.47319600  | F      | -6.10318200 | 0.48990900  | -1.41187500 |
| H     | 5.54097200  | 1.57867400  | 3.00012600  | C      | -4.77967000 | 0.51152600  | -1.26835100 |
| C     | 4.30633700  | 0.55783000  | 1.57626400  | F      | -4.60942400 | -1.68531900 | -2.10780800 |
| H     | 3.65652900  | 1.41446600  | 1.43142600  | C      | -4.01643900 | -0.59097900 | -1.62657300 |
| C     | 3.15317300  | -1.84465400 | -1.60323800 | F      | -1.96854900 | -1.66366700 | -1.78488500 |
| C     | 4.40957300  | -1.70700900 | -2.20345700 | C      | -2.63964900 | -0.53482100 | -1.47098600 |
| H     | 5.11668800  | -0.96927000 | -1.83377100 | H      | 2.47285100  | 0.54005400  | -0.69682900 |
| C     | 4.75096400  | -2.52694500 | -3.27157200 | C      | 0.28847200  | 0.07709400  | -2.30249000 |
| H     | 5.72103500  | -2.42034700 | -3.74492100 | H      | -0.21244800 | 0.68840300  | -3.05791900 |
| C     | 3.84603300  | -3.48329700 | -3.73105600 | H      | 1.36085800  | 0.26443600  | -2.44486000 |
| H     | 4.11582600  | -4.12166300 | -4.56599900 | H      | 0.10331500  | -0.96747500 | -2.56550800 |
| C     | 2.59961900  | -3.62307800 | -3.12714300 | P24_TS |             |             |             |

|   |             |             |             |   |             |             |             |
|---|-------------|-------------|-------------|---|-------------|-------------|-------------|
| P | 1.82896900  | 0.55675500  | -0.56049900 | C | 0.37397100  | 2.28257400  | 1.30218600  |
| B | -0.88027000 | -0.89018100 | -0.88618300 | C | 0.70474000  | 3.56692400  | 0.85539900  |
| C | 0.36227600  | 1.09260600  | 0.40080700  | H | 0.94333100  | 3.73330000  | -0.18921800 |
| C | -0.77907200 | 0.43136700  | 0.08196900  | C | 0.70895100  | 4.64034400  | 1.74153200  |
| C | 2.82576200  | 2.07052900  | -0.89912900 | H | 0.96999700  | 5.62945100  | 1.37909000  |
| C | 3.69118400  | 2.64308900  | 0.05719100  | C | 0.37240500  | 4.45284600  | 3.07891700  |
| C | 4.40436100  | 3.79424200  | -0.28241100 | H | 0.38023200  | 5.29276100  | 3.76598400  |
| H | 5.06323200  | 4.23376400  | 0.46272600  | C | 0.00635000  | 3.18561900  | 3.52592300  |
| C | 4.28744900  | 4.40420700  | -1.52699500 | H | -0.28112300 | 3.03210300  | 4.56108100  |
| C | 3.40845500  | 3.84058600  | -2.44919200 | C | 0.00284500  | 2.11143900  | 2.64360100  |
| H | 3.27949200  | 4.31210400  | -3.42056100 | H | -0.30368500 | 1.12512400  | 2.98385800  |
| C | 2.67783600  | 2.69045800  | -2.15936100 | C | -2.05663700 | 1.09322800  | 0.49365500  |
| C | 3.85180600  | 2.11058100  | 1.45642600  | C | -2.40846600 | 2.29459600  | -0.11983500 |
| H | 4.33249400  | 2.86205700  | 2.08609800  | F | -1.59285000 | 2.84505100  | -1.02485000 |
| H | 4.46248100  | 1.20336000  | 1.47732700  | C | -3.60601400 | 2.94160700  | 0.14287200  |
| H | 2.88117300  | 1.87917800  | 1.90336900  | F | -3.90724800 | 4.08399400  | -0.46911000 |
| C | 5.08924300  | 5.63039100  | -1.87354200 | C | -4.49902100 | 2.38221500  | 1.04678200  |
| H | 4.51815300  | 6.30746300  | -2.51340000 | F | -5.64893100 | 2.99157700  | 1.31315600  |
| H | 5.99949200  | 5.35416600  | -2.41566600 | C | -4.18447500 | 1.18329900  | 1.67098700  |
| H | 5.38980000  | 6.17462800  | -0.97562100 | F | -5.03643800 | 0.64234100  | 2.53866600  |
| C | 1.71397300  | 2.17794600  | -3.19860400 | C | -2.97963400 | 0.55464900  | 1.38452700  |
| H | 0.68840200  | 2.18256100  | -2.81718000 | F | -2.72306700 | -0.59970900 | 1.99973800  |
| H | 1.95552500  | 1.15393200  | -3.50061300 | C | 0.10974100  | -2.11121300 | -0.44299200 |
| H | 1.74237600  | 2.80650900  | -4.09029500 | C | 0.24119100  | -2.45737900 | 0.90239200  |
| C | 3.01428300  | -0.65520600 | 0.17035900  | F | -0.50785600 | -1.83946400 | 1.82350800  |
| C | 3.09431900  | -1.06132000 | 1.51510100  | C | 1.13525500  | -3.40614900 | 1.37098100  |
| C | 4.06363300  | -1.99898300 | 1.88444000  | F | 1.26068900  | -3.64287200 | 2.67874600  |
| H | 4.10340700  | -2.31320400 | 2.92557700  | C | 1.97830100  | -4.05117300 | 0.47870200  |
| C | 4.94102400  | -2.56499400 | 0.96789300  | F | 2.89909900  | -4.90383600 | 0.92143100  |
| C | 4.83648600  | -2.16497600 | -0.36366300 | C | 1.86863700  | -3.77114400 | -0.87057900 |
| H | 5.49704000  | -2.60705000 | -1.10556300 | F | 2.68409300  | -4.35775600 | -1.74600100 |
| C | 3.89271400  | -1.23063600 | -0.78155400 | C | 0.92884100  | -2.84099500 | -1.29965500 |
| C | 2.18161700  | -0.57308900 | 2.60967100  | F | 0.90403000  | -2.64198600 | -2.63304200 |
| H | 1.87398300  | -1.41490800 | 3.23525000  | C | -2.44863700 | -1.34058700 | -1.05392100 |
| H | 1.28112300  | -0.10999000 | 2.21834100  | C | -2.99738100 | -2.47282400 | -0.45146500 |
| H | 2.69252300  | 0.15150000  | 3.25244900  | F | -2.24240100 | -3.33372500 | 0.24017200  |
| C | 5.92233800  | -3.62688100 | 1.38359700  | C | -4.35045300 | -2.79706900 | -0.50694600 |
| H | 6.21974500  | -3.50568600 | 2.42764600  | F | -4.80175000 | -3.89966200 | 0.08690700  |
| H | 6.82012700  | -3.60531600 | 0.76157100  | C | -5.23071300 | -1.96943500 | -1.18234600 |
| H | 5.46340800  | -4.61473100 | 1.27839400  | F | -6.52346800 | -2.26733400 | -1.24971500 |
| C | 3.81466000  | -0.91335400 | -2.25681900 | C | -4.74159300 | -0.82280800 | -1.79078600 |
| H | 3.93366400  | 0.15666700  | -2.45635500 | F | -5.57037600 | -0.00400300 | -2.43614400 |
| H | 2.85351300  | -1.23566100 | -2.67487900 | C | -3.38674600 | -0.53888900 | -1.71041400 |
| H | 4.60134200  | -1.44333400 | -2.79652600 | F | -3.01120400 | 0.61477400  | -2.29390200 |

|       |             |             |             |   |             |             |             |
|-------|-------------|-------------|-------------|---|-------------|-------------|-------------|
| H     | 0.64926300  | -0.14426400 | -1.74078200 | H | 6.59715000  | -3.88656000 | 1.31084200  |
| C     | -0.38957900 | -0.33217200 | -2.59804300 | H | 5.14688200  | -4.82916300 | 1.67853600  |
| H     | -0.87417100 | 0.62286500  | -2.77226600 | H | 5.83728700  | -3.76506000 | 2.91023400  |
| H     | 0.49780300  | -0.39889200 | -3.24090700 | C | 4.05798800  | -1.04724300 | -1.97331300 |
| H     | -0.98555100 | -1.15179000 | -3.00251700 | H | 4.16873400  | 0.02431900  | -2.16624600 |
| P24_P |             |             |             | H | 3.17296800  | -1.40655100 | -2.51202300 |
| P     | 1.96105300  | 0.49143200  | -0.39318200 | H | 4.92245000  | -1.55218800 | -2.40602000 |
| B     | -1.06311400 | -0.82518400 | -1.14497800 | C | 0.43219100  | 2.20172700  | 1.24614000  |
| C     | 0.37655100  | 1.03496600  | 0.30534800  | C | 0.83903000  | 3.47658700  | 0.83530300  |
| C     | -0.79036700 | 0.47776200  | -0.12074900 | H | 1.11056500  | 3.65008800  | -0.20014100 |
| C     | 2.98722700  | 1.94228600  | -0.79889400 | C | 0.86391700  | 4.53488900  | 1.73965300  |
| C     | 3.89340800  | 2.48634300  | 0.13331400  | H | 1.18269900  | 5.51626100  | 1.40372100  |
| C     | 4.66890900  | 3.57765700  | -0.25457200 | C | 0.46661100  | 4.34212000  | 3.05907600  |
| H     | 5.36443000  | 4.00178100  | 0.46530600  | H | 0.48621600  | 5.16971400  | 3.76069600  |
| C     | 4.56709900  | 4.14948800  | -1.52031100 | C | 0.01959700  | 3.08771000  | 3.46833400  |
| C     | 3.63106400  | 3.62118700  | -2.40702400 | H | -0.32152600 | 2.93428600  | 4.48697100  |
| H     | 3.50809700  | 4.07649500  | -3.38640300 | C | 0.00109100  | 2.02804200  | 2.56884600  |
| C     | 2.83120700  | 2.52997100  | -2.07348500 | H | -0.37351400 | 1.05572900  | 2.87807600  |
| C     | 4.02020200  | 1.98905900  | 1.54990500  | C | -1.98825000 | 1.28325700  | 0.27651200  |
| H     | 4.58509000  | 2.70808300  | 2.14576700  | C | -2.22130500 | 2.51501700  | -0.33046400 |
| H     | 4.52948700  | 1.02292200  | 1.60592600  | F | -1.34768300 | 2.99458200  | -1.22428800 |
| H     | 3.03341100  | 1.88849900  | 2.01324800  | C | -3.35449400 | 3.26645800  | -0.06555800 |
| C     | 5.44536400  | 5.30431300  | -1.92020500 | F | -3.55387400 | 4.43160900  | -0.67769400 |
| H     | 6.37081800  | 4.93887600  | -2.37720100 | C | -4.28995900 | 2.79218000  | 0.84475400  |
| H     | 5.72135300  | 5.91010700  | -1.05431700 | F | -5.37919900 | 3.50422600  | 1.11300700  |
| H     | 4.94772700  | 5.94715800  | -2.64952400 | C | -4.07674000 | 1.57826600  | 1.48204200  |
| C     | 1.80681600  | 2.05410800  | -3.07235400 | F | -4.95958000 | 1.13075200  | 2.37148100  |
| H     | 0.80617000  | 1.99174500  | -2.63182500 | C | -2.93670200 | 0.84106200  | 1.19034400  |
| H     | 2.05517900  | 1.06480300  | -3.47469900 | F | -2.75280800 | -0.30805700 | 1.84071900  |
| H     | 1.75601200  | 2.74467900  | -3.91537100 | C | 0.00778200  | -2.01607000 | -0.72785400 |
| C     | 3.01710200  | -0.77782000 | 0.37138000  | C | 0.07941900  | -2.45454500 | 0.59483500  |
| C     | 2.92557100  | -1.19148000 | 1.71449600  | F | -0.75356400 | -1.92552500 | 1.50575100  |
| C     | 3.80864900  | -2.17123600 | 2.16793200  | C | 0.96487400  | -3.41097900 | 1.06212300  |
| H     | 3.72487000  | -2.50417200 | 3.19914700  | F | 1.02401700  | -3.72027400 | 2.36020400  |
| C     | 4.75795300  | -2.75994000 | 1.33743300  | C | 1.86345000  | -3.98885200 | 0.17701600  |
| C     | 4.81776600  | -2.34427000 | 0.00937600  | F | 2.76768000  | -4.86810000 | 0.60965400  |
| H     | 5.53483400  | -2.80857200 | -0.66258800 | C | 1.84381000  | -3.59540500 | -1.14852300 |
| C     | 3.96437500  | -1.36738900 | -0.49942700 | F | 2.75790000  | -4.07311600 | -1.99788900 |
| C     | 1.90096800  | -0.66575600 | 2.68413600  | C | 0.92434500  | -2.63852600 | -1.57035500 |
| H     | 1.84297400  | -1.32528400 | 3.55178700  | F | 1.03168700  | -2.29781600 | -2.87068000 |
| H     | 0.90676000  | -0.62485800 | 2.23799600  | C | -2.63758700 | -1.35070000 | -0.99192300 |
| H     | 2.15211900  | 0.33791700  | 3.04099400  | C | -3.06682400 | -2.56866300 | -0.45921800 |
| C     | 5.64225800  | -3.86683100 | 1.84050400  | F | -2.20411700 | -3.49992400 | -0.02170100 |
|       |             |             |             | C | -4.40063900 | -2.94934800 | -0.34269300 |

|        |             |             |             |   |             |             |             |
|--------|-------------|-------------|-------------|---|-------------|-------------|-------------|
| F      | -4.71708100 | -4.13096300 | 0.18917100  | C | 1.15369900  | 1.76749500  | -0.84511800 |
| C      | -5.40265200 | -2.10291300 | -0.78166300 | F | 1.31521000  | 1.51272500  | -2.15759900 |
| F      | -6.68334300 | -2.44678700 | -0.67014500 | C | 0.99649500  | 3.10615300  | -0.51849300 |
| C      | -5.04176800 | -0.89079000 | -1.34588100 | F | 0.94215700  | 4.04140600  | -1.46729100 |
| F      | -5.98287900 | -0.05266100 | -1.78509700 | C | 0.86200100  | 3.46440300  | 0.81188300  |
| C      | -3.69746900 | -0.55907100 | -1.44910800 | F | 0.65304100  | 4.73481600  | 1.15017200  |
| F      | -3.47000600 | 0.63922000  | -2.02126700 | C | 0.89496900  | 2.47708100  | 1.78005900  |
| H      | 1.64186700  | -0.05298400 | -1.63357300 | C | 1.01511200  | 1.14417500  | 1.40652000  |
| C      | -0.86140700 | -0.29048800 | -2.68346800 | F | 0.98437600  | 0.27343700  | 2.42346000  |
| H      | -1.37198900 | 0.66104700  | -2.84823200 | F | 0.72561900  | 2.80640500  | 3.06176400  |
| H      | 0.18109200  | -0.15382800 | -2.97543700 | C | -3.33965000 | -1.17793600 | -0.69798800 |
| H      | -1.27736500 | -1.01217300 | -3.39460100 | C | -4.59373000 | -0.52921800 | -0.78649500 |
|        |             |             |             | C | -4.91595200 | 0.82879400  | -0.20188000 |
| P25_TS |             |             |             | C | -5.65467900 | -1.19716200 | -1.40423900 |
| C      | -2.45334400 | -2.39723700 | 3.36113500  | C | -5.53850600 | -2.48411700 | -1.91709600 |
| C      | -1.32829700 | -3.15963700 | 3.51735900  | C | -6.69079300 | -3.15128600 | -2.61976300 |
| C      | -0.23048600 | -3.04945100 | 2.62838000  | C | -4.32197300 | -3.13580200 | -1.74776300 |
| C      | -0.21304300 | -2.07149900 | 1.57683000  | C | -3.22930500 | -2.52005200 | -1.13944600 |
| C      | -1.42668400 | -1.30378500 | 1.43661200  | C | -2.02002400 | -3.38942500 | -0.88518300 |
| C      | -2.50340300 | -1.50267600 | 2.28066000  | C | -2.01721300 | 1.42700900  | -0.00774300 |
| H      | 0.77723600  | -4.70299800 | 3.58693200  | C | -2.12072700 | 2.20762600  | 1.16063500  |
| H      | -3.30555800 | -2.50671100 | 4.02282300  | C | -2.11404300 | 1.64970900  | 2.56298200  |
| H      | -1.26799200 | -3.90074600 | 4.30998400  | C | -2.23842100 | 3.59502000  | 1.03413600  |
| C      | 0.82849100  | -3.98277600 | 2.77529500  | C | -2.24198500 | 4.23823000  | -0.19828000 |
| C      | 0.96077700  | -1.98942900 | 0.72144600  | C | -2.24851300 | 5.73918000  | -0.29518400 |
| H      | -3.43419400 | -0.97674100 | 2.08353500  | C | -2.16163800 | 3.44829800  | -1.34290600 |
| C      | 1.90466700  | -2.98787200 | 0.88586600  | C | -2.04140700 | 2.06266200  | -1.27311800 |
| C      | 1.85693100  | -3.98605900 | 1.88352200  | C | -1.91834200 | 1.30153400  | -2.57302900 |
| H      | 2.77334800  | -2.99451700 | 0.23566900  | H | -5.99963100 | 0.92899500  | -0.11180500 |
| H      | 2.65569600  | -4.71744400 | 1.95214900  | H | -4.48505000 | 0.96031900  | 0.79313400  |
| P      | -1.76870200 | -0.39534400 | -0.10954700 | H | -4.55262200 | 1.65591000  | -0.81814200 |
| B      | 1.36622900  | -0.83593400 | -0.37842000 | H | -6.61399400 | -0.68879900 | -1.47079000 |
| C      | 2.99266300  | -0.86380100 | -0.73823900 | H | -6.66616400 | -4.23454400 | -2.47961100 |
| C      | 3.84685900  | -0.55351900 | 0.32908800  | H | -7.64897400 | -2.77744000 | -2.25149200 |
| F      | 3.33577000  | -0.35017100 | 1.55048500  | H | -6.65118100 | -2.95635200 | -3.69651100 |
| C      | 5.22569800  | -0.45088600 | 0.23699200  | H | -4.21672400 | -4.16398700 | -2.08660200 |
| F      | 5.95853800  | -0.15266400 | 1.30889100  | H | -2.06369100 | -3.79548300 | 0.13226200  |
| C      | 5.84234100  | -0.66584300 | -0.98692700 | H | -1.06350100 | -2.87380100 | -0.96396500 |
| F      | 7.16316000  | -0.57207100 | -1.10547400 | H | -2.00585300 | -4.22977300 | -1.58235300 |
| C      | 5.05488300  | -0.98504900 | -2.07690900 | H | -2.04703800 | 2.46716700  | 3.28301000  |
| C      | 3.67032100  | -1.07992600 | -1.93892900 | H | -1.27773000 | 0.97348600  | 2.74883000  |
| F      | 3.04283900  | -1.41356300 | -3.08030600 | H | -3.03380000 | 1.09570500  | 2.77495600  |
| F      | 5.62188600  | -1.20894700 | -3.26244700 | H | -2.28931000 | 4.19250800  | 1.94136000  |
| C      | 1.12045300  | 0.72279100  | 0.07910600  | H | -2.81894400 | 6.08103600  | -1.16226100 |

|       |             |             |             |   |             |             |             |
|-------|-------------|-------------|-------------|---|-------------|-------------|-------------|
| H     | -1.22123000 | 6.10208500  | -0.40524800 | F | 0.64998300  | 1.79130100  | -2.34274600 |
| H     | -2.67036300 | 6.19545500  | 0.60293300  | C | 0.89718800  | 3.08946600  | -0.45348900 |
| H     | -2.16001700 | 3.92494300  | -2.32031500 | F | 0.63018700  | 4.17276500  | -1.18987800 |
| H     | -2.08515600 | 1.97461600  | -3.41583500 | C | 1.10818000  | 3.22867000  | 0.90719800  |
| H     | -0.91391500 | 0.88204200  | -2.68560100 | F | 1.01642500  | 4.43002400  | 1.48109100  |
| H     | -2.64228700 | 0.48386900  | -2.64987600 | C | 1.32793800  | 2.09711700  | 1.67634800  |
| H     | -0.31284900 | -0.81163500 | -1.08888500 | C | 1.31753900  | 0.85210900  | 1.06446300  |
| C     | 0.59111700  | -1.27054500 | -2.00389200 | F | 1.53382500  | -0.19953000 | 1.87085100  |
| H     | 1.06912900  | -2.25066600 | -2.03713700 | F | 1.47070300  | 2.21246300  | 3.00080400  |
| H     | 1.06117900  | -0.57635900 | -2.69019500 | C | -3.57567000 | -0.91340900 | -0.54005300 |
| H     | -0.40474300 | -1.46370200 | -2.42988500 | C | -4.76514200 | -0.39558000 | 0.01230700  |
|       |             |             |             | C | -4.83574600 | 0.73773800  | 1.01118800  |
| P25_P |             |             |             | C | -5.97932800 | -0.94964300 | -0.39879200 |
| C     | -1.97447400 | -2.85014200 | 3.01779700  | C | -6.05317300 | -1.98246500 | -1.32686400 |
| C     | -1.03175100 | -3.78265100 | 2.67405600  | C | -7.37559000 | -2.57571400 | -1.73250700 |
| C     | -0.18399300 | -3.60914000 | 1.55353200  | C | -4.86221700 | -2.47395300 | -1.85754400 |
| C     | -0.18487900 | -2.38071300 | 0.80194200  | C | -3.62156400 | -1.96583300 | -1.48392200 |
| C     | -1.26910100 | -1.48569500 | 1.13137100  | C | -2.38740100 | -2.54731900 | -2.13136300 |
| C     | -2.13530000 | -1.73656900 | 2.18124000  | C | -1.98729500 | 1.47818900  | 0.24031200  |
| H     | 0.61381100  | -5.60815700 | 1.73703200  | C | -1.79317800 | 2.08953100  | 1.49292900  |
| H     | -2.63745000 | -3.00053400 | 3.86205600  | C | -1.49147600 | 1.35964800  | 2.78021600  |
| H     | -0.94379100 | -4.70720600 | 3.23873300  | C | -1.88134500 | 3.48206000  | 1.56140100  |
| C     | 0.63118400  | -4.69459700 | 1.15015900  | C | -2.11926800 | 4.27340100  | 0.44383700  |
| C     | 0.79556300  | -2.18720100 | -0.23667400 | C | -2.05404600 | 5.77215700  | 0.53250200  |
| H     | -2.99218700 | -1.08878500 | 2.34418800  | C | -2.32866400 | 3.63816000  | -0.77991700 |
| C     | 1.45713400  | -3.33790800 | -0.63919700 | C | -2.26824700 | 2.25521000  | -0.91222900 |
| C     | 1.38041000  | -4.58350800 | 0.01403700  | C | -2.45596000 | 1.65910100  | -2.28848900 |
| H     | 2.17344300  | -3.24909100 | -1.45311400 | H | -5.82644500 | 0.75689800  | 1.46904000  |
| H     | 1.96997500  | -5.42027300 | -0.34723600 | H | -4.10362300 | 0.64803300  | 1.81646600  |
| P     | -1.91799500 | -0.30739200 | -0.07093200 | H | -4.66360200 | 1.70714500  | 0.53327700  |
| B     | 1.41702500  | -0.83309300 | -0.98214200 | H | -6.89863600 | -0.55489600 | 0.02643600  |
| C     | 3.08210700  | -0.83605500 | -0.77628900 | H | -7.42906700 | -2.71066200 | -2.81585000 |
| C     | 3.80073900  | -1.49808500 | 0.22329300  | H | -7.51211100 | -3.55961200 | -1.27279400 |
| F     | 3.19728800  | -2.27470600 | 1.13615300  | H | -8.20851300 | -1.94159400 | -1.42274300 |
| C     | 5.18196900  | -1.40745300 | 0.37497400  | H | -4.89695900 | -3.28191200 | -2.58443400 |
| F     | 5.80102700  | -2.09267300 | 1.34003800  | H | -2.65037700 | -3.44654700 | -2.69022500 |
| C     | 5.91847800  | -0.58971400 | -0.46486300 | H | -1.60850400 | -2.82129900 | -1.41306800 |
| F     | 7.24006300  | -0.48563800 | -0.32631700 | H | -1.94210100 | -1.84109500 | -2.84114100 |
| C     | 5.25137700  | 0.13718200  | -1.43770700 | H | -1.06921600 | 2.06180800  | 3.50073200  |
| C     | 3.87377400  | 0.01116200  | -1.55715800 | H | -0.77439000 | 0.54775400  | 2.65829800  |
| F     | 3.31104800  | 0.82268600  | -2.47176100 | H | -2.40042100 | 0.93907000  | 3.22607400  |
| F     | 5.93130300  | 0.96615100  | -2.23365400 | H | -1.70081100 | 3.96237300  | 2.51987100  |
| C     | 1.10115900  | 0.64618800  | -0.29846000 | H | -2.70833600 | 6.24707900  | -0.20189600 |
| C     | 0.90167300  | 1.82104600  | -1.02254600 | H | -1.02721100 | 6.09370200  | 0.32903800  |

|             |             |             |             |      |             |             |             |
|-------------|-------------|-------------|-------------|------|-------------|-------------|-------------|
| H           | -2.32587400 | 6.12711000  | 1.52881200  | H    | 6.08541500  | -2.56140900 | -0.03152500 |
| H           | -2.50843200 | 4.23886700  | -1.66762500 | H    | 5.13034200  | -3.95593400 | 0.47658400  |
| H           | -2.68176300 | 2.45035800  | -3.00436000 | C    | -1.75068800 | 1.28242400  | -2.57243600 |
| H           | -1.53997700 | 1.16697200  | -2.63229500 | H    | -1.51084000 | 2.18456500  | -2.00708500 |
| H           | -3.27566600 | 0.93484500  | -2.32056300 | H    | -0.87681500 | 1.06761600  | -3.19293800 |
| H           | -1.13265200 | -0.46000300 | -1.21078600 | H    | -2.57759900 | 1.52452200  | -3.24427900 |
| C           | 1.02400500  | -0.93685400 | -2.57287800 | C    | -5.25520900 | -2.13759200 | -1.73584000 |
| H           | 1.57521400  | -0.25618200 | -3.21869400 | H    | -5.74165900 | -1.55260200 | -2.51992400 |
| H           | -0.03951700 | -0.73543000 | -2.76802700 | H    | -5.20240200 | -3.17763100 | -2.07195300 |
| H           | 1.19966900  | -1.95559800 | -2.93669900 | H    | -5.89912200 | -2.11640000 | -0.85056800 |
| <b>C6H6</b> |             |             |             | C    | -1.00264100 | -2.62632100 | 0.77049500  |
| N1_TS       |             |             |             | H    | 0.06253600  | -2.41141400 | 0.79689800  |
| C           | 0.36399700  | 2.76585100  | -0.24051900 | H    | -1.39579100 | -2.49065400 | 1.78404100  |
| C           | 0.59764200  | 1.52299400  | -0.83251500 | H    | -1.13057700 | -3.68264500 | 0.51265900  |
| C           | 1.37498100  | 1.55448800  | -2.00402300 | H    | 2.95642400  | -3.55434400 | -1.75948400 |
| C           | 1.83210100  | 2.74143500  | -2.56293000 | H    | -3.36105600 | -3.19700300 | -0.09012300 |
| C           | 1.55492800  | 3.96185600  | -1.94682600 | H    | -4.02375000 | 0.07896300  | -2.73191600 |
| C           | 0.82324400  | 3.97227000  | -0.76704100 | C    | 0.19275700  | 3.49872000  | 2.11136300  |
| H           | 1.63264400  | 0.61200500  | -2.48204700 | H    | -0.23535500 | 3.11967100  | 3.04429100  |
| H           | 2.42081600  | 2.71745600  | -3.47471600 | H    | 1.27345700  | 3.35373900  | 2.12423900  |
| H           | 1.91735900  | 4.89157500  | -2.37303300 | H    | -0.02666900 | 4.56943500  | 2.02531300  |
| H           | 0.61207400  | 4.90835900  | -0.25619000 | C    | -1.80761100 | 3.06489900  | 0.80503000  |
| H           | -0.28964500 | 1.39264800  | 1.25889200  | H    | -2.33699900 | 2.92594000  | 1.75120400  |
| B           | 0.14125300  | 0.06670000  | -0.24633600 | H    | -1.91763900 | 4.10366100  | 0.47011200  |
| N           | -0.38667600 | 2.73993000  | 0.99762900  | H    | -2.22837700 | 2.39298900  | 0.05367000  |
| C           | -1.28402000 | -0.55018100 | -0.76942000 | H    | 4.70220900  | -0.80450000 | 0.98830100  |
| C           | -1.77263300 | -1.77012000 | -0.21640900 | C    | 2.79346700  | 0.95550200  | 1.10149200  |
| C           | -2.12914500 | 0.08235600  | -1.71993700 | H    | 3.11608500  | 1.71236100  | 0.37632400  |
| C           | -3.03312100 | -2.26197600 | -0.54337300 | H    | 1.86073200  | 1.30889700  | 1.53658600  |
| C           | -3.40005200 | -0.43961400 | -2.00667300 | H    | 3.54212500  | 0.91389700  | 1.89855900  |
| C           | -3.88379400 | -1.59947600 | -1.42265500 | C    | 0.38896400  | -0.38149500 | 2.73110000  |
| C           | 1.51346800  | -0.82686300 | -0.27566900 | C    | -0.10539800 | -0.94060600 | 3.90925900  |
| C           | 1.67705400  | -1.96006900 | -1.11525800 | C    | -1.46983400 | -0.92969900 | 4.17451200  |
| C           | 2.67522300  | -0.39345100 | 0.41634200  | C    | -2.34173000 | -0.37675000 | 3.23655000  |
| C           | 2.87298000  | -2.68477400 | -1.10979200 | C    | -1.83816400 | 0.15195400  | 2.05564700  |
| C           | 3.84454600  | -1.15714100 | 0.41737800  | C    | -0.45601900 | 0.17992900  | 1.75815900  |
| C           | 3.95832100  | -2.33040900 | -0.31812200 | H    | 1.45803400  | -0.43686900 | 2.56234800  |
| C           | 0.63930900  | -2.43485700 | -2.11346500 | H    | 0.58379100  | -1.38698500 | 4.61963300  |
| H           | -0.14140900 | -3.04652500 | -1.65354700 | H    | -1.85412800 | -1.35728400 | 5.09567100  |
| H           | 0.13395200  | -1.60637200 | -2.61377200 | H    | -3.41222600 | -0.37597100 | 3.41798600  |
| H           | 1.12844400  | -3.04428400 | -2.87806100 | H    | -2.54337800 | 0.52580700  | 1.31821100  |
| C           | 5.21014300  | -3.16739300 | -0.27948600 | N1_P |             |             |             |
| H           | 5.39105300  | -3.65363900 | -1.24171000 | C    | -0.05234500 | 2.55181500  | -1.02016700 |

|   |             |             |             |       |             |             |             |
|---|-------------|-------------|-------------|-------|-------------|-------------|-------------|
| C | 0.32086800  | 1.21001900  | -1.11443700 | H     | 3.29745000  | -3.69029100 | -0.75426200 |
| C | 1.05681300  | 0.93074400  | -2.28833600 | H     | -2.94322800 | -3.58795500 | 1.10364400  |
| C | 1.34606200  | 1.87589900  | -3.26034800 | H     | -3.97372700 | -1.45774500 | -2.43718600 |
| C | 0.92013400  | 3.19692500  | -3.11092200 | C     | -0.18811100 | 4.08169300  | 0.95209300  |
| C | 0.21473800  | 3.53906100  | -1.96987400 | H     | -0.69456000 | 4.14593700  | 1.91722900  |
| H | 1.41777600  | -0.08493700 | -2.42543500 | H     | 0.86514900  | 3.84208700  | 1.09410500  |
| H | 1.91207900  | 1.58690500  | -4.14055900 | H     | -0.28956100 | 5.02112300  | 0.40812500  |
| H | 1.14157700  | 3.94569800  | -3.86369600 | C     | -2.24797300 | 3.24644400  | -0.12453000 |
| H | -0.12066600 | 4.56234900  | -1.81958400 | H     | -2.77477200 | 3.41897000  | 0.81603000  |
| H | -0.80556000 | 2.15035200  | 0.80722400  | H     | -2.31758100 | 4.11962400  | -0.77440800 |
| B | 0.09082800  | -0.06843800 | -0.03747100 | H     | -2.65512700 | 2.36830100  | -0.62740600 |
| N | -0.81649300 | 2.98144400  | 0.17522800  | H     | 4.83400500  | -0.04812400 | 0.82873300  |
| C | -1.23034400 | -1.02664100 | -0.42049800 | C     | 2.73334300  | 1.44421100  | 0.59881400  |
| C | -1.57405100 | -2.05497500 | 0.50712600  | H     | 2.92382900  | 1.97041500  | -0.34476400 |
| C | -2.13556500 | -0.85462600 | -1.49871100 | H     | 1.78981900  | 1.81678600  | 0.99186300  |
| C | -2.73508000 | -2.81143900 | 0.36803000  | H     | 3.52426500  | 1.72266900  | 1.30216600  |
| C | -3.30465800 | -1.62757800 | -1.59523300 | C     | 0.55410100  | 0.51848700  | 2.62604400  |
| C | -3.63404300 | -2.60757500 | -0.67377200 | C     | 0.14092800  | 0.91150900  | 3.89751500  |
| C | 1.59487200  | -0.79802700 | -0.05056300 | C     | -1.18788000 | 1.25164700  | 4.13887200  |
| C | 1.86390300  | -2.11248900 | -0.51574200 | C     | -2.10146100 | 1.15194500  | 3.09448000  |
| C | 2.73834700  | -0.05726600 | 0.36371200  | C     | -1.67346800 | 0.73400700  | 1.83279600  |
| C | 3.14230100  | -2.67262900 | -0.39917900 | C     | -0.32335900 | 0.43902000  | 1.52739500  |
| C | 3.99690600  | -0.65221200 | 0.48085000  | H     | 1.59045200  | 0.22161700  | 2.49516900  |
| C | 4.21904100  | -1.97929400 | 0.13578600  | H     | 0.86291600  | 0.94232300  | 4.70872000  |
| C | 0.85260400  | -2.99043900 | -1.22707200 | H     | -1.50993100 | 1.56000300  | 5.12868700  |
| H | 0.17875000  | -3.50910300 | -0.53973800 | H     | -3.15408500 | 1.36241800  | 3.26521200  |
| H | 0.22129400  | -2.42263500 | -1.91289700 | H     | -2.42272900 | 0.59712600  | 1.05342000  |
| H | 1.38258700  | -3.75253400 | -1.80508600 |       |             |             |             |
| C | 5.56812100  | -2.62627200 | 0.31191500  | N2_TS |             |             |             |
| H | 5.72950900  | -3.41303300 | -0.42976800 | C     | -0.86962400 | 2.51149900  | -0.71137600 |
| H | 6.37486000  | -1.89447500 | 0.21511300  | C     | -0.05570600 | 1.43195500  | -1.08942900 |
| H | 5.65878800  | -3.08554400 | 1.30235500  | C     | 0.60907700  | 1.58596000  | -2.31643100 |
| C | -1.92866900 | 0.08926500  | -2.67120700 | C     | 0.47909300  | 2.73024100  | -3.09826700 |
| H | -1.80761100 | 1.13798000  | -2.39154200 | C     | -0.32132600 | 3.78642800  | -2.67086000 |
| H | -1.03850400 | -0.17657600 | -3.24778200 | C     | -1.00180600 | 3.67564100  | -1.46439800 |
| H | -2.78456600 | 0.02690800  | -3.34815400 | H     | 1.25454500  | 0.78323000  | -2.66155900 |
| C | -4.88563500 | -3.43629100 | -0.80277200 | H     | 1.01038400  | 2.80088900  | -4.04252300 |
| H | -5.46792900 | -3.42346100 | 0.12376700  | H     | -0.42015400 | 4.68428500  | -3.27231800 |
| H | -5.52394100 | -3.06662500 | -1.60928700 | H     | -1.64263600 | 4.48317600  | -1.12030800 |
| H | -4.64587200 | -4.48249200 | -1.01942200 | H     | -0.81206500 | 1.30555300  | 1.06199600  |
| C | -0.72272700 | -2.42495000 | 1.70881100  | B     | 0.04236300  | 0.09497100  | -0.15035100 |
| H | 0.33171500  | -2.18318300 | 1.57737300  | N     | -1.62232100 | 2.34546900  | 0.52754300  |
| H | -1.06864500 | -1.90845900 | 2.61152700  | C     | -1.34755000 | -0.75067900 | -0.27744600 |
| H | -0.80319600 | -3.50026700 | 1.89601900  | C     | -2.31082900 | -0.82215800 | 0.73909400  |

|   |             |             |             |      |             |             |             |
|---|-------------|-------------|-------------|------|-------------|-------------|-------------|
| C | -1.66484200 | -1.43196600 | -1.47409900 | H    | -3.07740100 | -2.67263600 | -2.50113500 |
| C | -3.51084800 | -1.52649000 | 0.64609000  | H    | -2.15097500 | -0.27213900 | 1.66419300  |
| C | -2.86245700 | -2.14551900 | -1.57264200 | C    | 1.01276900  | -0.13041600 | 3.75271600  |
| C | -3.79252000 | -2.21684000 | -0.53876300 | C    | 0.16780700  | -0.17990800 | 2.65033300  |
| C | 1.45197800  | -0.72123900 | -0.27373900 | C    | 0.26830300  | 0.74933000  | 1.59661900  |
| C | 1.62882100  | -2.10381600 | -0.04516400 | C    | 1.24908300  | 1.75407600  | 1.73513100  |
| C | 2.61761500  | 0.00927900  | -0.56248200 | C    | 2.09049900  | 1.82069000  | 2.83764400  |
| C | 2.90883700  | -2.66104300 | -0.15817500 | C    | 1.97577300  | 0.87048800  | 3.85071100  |
| C | 3.89106700  | -0.54004500 | -0.67171100 | H    | 0.92310200  | -0.87722000 | 4.53532800  |
| C | 4.04124500  | -1.91961300 | -0.47369000 | H    | -0.55711800 | -0.98458700 | 2.59426000  |
| C | 5.39330300  | -2.57396700 | -0.57963900 | H    | 1.36858400  | 2.48154300  | 0.93377700  |
| H | 6.10168200  | -2.14880800 | 0.14036400  | H    | 2.84245700  | 2.60080800  | 2.90472700  |
| H | 5.32540600  | -3.64778500 | -0.39159000 | H    | 2.63660900  | 0.90816200  | 4.71137700  |
| H | 5.83059600  | -2.43243600 | -1.57448900 |      |             |             |             |
| C | -5.06623100 | -3.00563100 | -0.69226600 | N2_P |             |             |             |
| H | -5.11930200 | -3.47831000 | -1.67544500 | C    | -1.06941600 | 2.09408400  | -1.16979300 |
| H | -5.14305800 | -3.79362500 | 0.06529000  | C    | 0.04106200  | 1.24000900  | -1.13452700 |
| H | -5.95032600 | -2.36817800 | -0.57683400 | C    | 0.91760800  | 1.42975600  | -2.21935400 |
| C | -1.50903000 | 3.46731500  | 1.47051900  | C    | 0.70810100  | 2.37429700  | -3.21820900 |
| H | -1.96528100 | 3.16832300  | 2.41805700  | C    | -0.41374200 | 3.19871700  | -3.18815000 |
| H | -0.45884900 | 3.70031500  | 1.64366300  | C    | -1.32158200 | 3.05114500  | -2.14922600 |
| H | -2.02361100 | 4.35939300  | 1.09600800  | H    | 1.79404100  | 0.79270700  | -2.28236500 |
| C | -3.04486800 | 2.06854000  | 0.24426800  | H    | 1.42371400  | 2.46519100  | -4.02964800 |
| H | -3.54143100 | 1.73918800  | 1.16104400  | H    | -0.58499700 | 3.93946700  | -3.96159600 |
| H | -3.52900700 | 2.98166300  | -0.12523500 | H    | -2.21234200 | 3.67304000  | -2.11380100 |
| H | -3.12020700 | 1.28290800  | -0.50525400 | H    | -1.70789900 | 1.25309200  | 0.55126300  |
| C | 0.51369400  | -3.05387600 | 0.33043000  | B    | 0.24978600  | 0.07137300  | 0.05004100  |
| H | -0.15547300 | -2.63214200 | 1.08218300  | N    | -2.10566200 | 1.94208300  | -0.10596300 |
| H | -0.11303000 | -3.31211100 | -0.52960300 | C    | -1.10149600 | -0.88498900 | -0.07562800 |
| H | 0.93389800  | -3.98186300 | 0.72724500  | C    | -2.02996000 | -1.02381500 | 0.97112800  |
| C | -0.75004600 | -1.42166900 | -2.67577400 | C    | -1.45348700 | -1.52083300 | -1.29086800 |
| H | -0.82395600 | -0.47145900 | -3.21545500 | C    | -3.23589500 | -1.72553900 | 0.87722200  |
| H | 0.29760900  | -1.55094400 | -2.38879500 | C    | -2.65383900 | -2.23031800 | -1.38925000 |
| H | -1.01847100 | -2.22170800 | -3.37066800 | C    | -3.56016700 | -2.34458800 | -0.33515200 |
| C | -4.48607900 | -1.53598000 | 1.79474800  | C    | 1.70606300  | -0.68972700 | -0.09531900 |
| H | -5.46130500 | -1.13178800 | 1.49922600  | C    | 1.98311300  | -2.07218300 | -0.04238400 |
| H | -4.66486800 | -2.55231500 | 2.16345600  | C    | 2.82944000  | 0.15607300  | -0.16343600 |
| H | -4.11290500 | -0.93897100 | 2.63104500  | C    | 3.31182800  | -2.51342300 | -0.12721400 |
| C | 5.08225200  | 0.32637100  | -0.98921400 | C    | 4.14838900  | -0.27538500 | -0.24686700 |
| H | 5.83954300  | 0.27458900  | -0.19860000 | C    | 4.39803600  | -1.65580300 | -0.24297400 |
| H | 5.57255900  | 0.01170900  | -1.91760300 | C    | 5.80391600  | -2.18906600 | -0.33331600 |
| H | 4.78573600  | 1.37158600  | -1.10378900 | H    | 6.42122000  | -1.83880000 | 0.50191900  |
| H | 3.02438100  | -3.72942000 | 0.01858700  | H    | 5.81050600  | -3.28139700 | -0.32042700 |
| H | 2.53404800  | 1.08625100  | -0.69810900 | H    | 6.30034400  | -1.85952900 | -1.25321400 |



|   |             |             |             |       |             |             |             |
|---|-------------|-------------|-------------|-------|-------------|-------------|-------------|
| C | -4.84119600 | -3.12119700 | -0.49294800 | N3_TS |             |             |             |
| H | -4.93023500 | -3.53229200 | -1.50083300 | C     | 1.15242100  | 2.55562300  | -0.98133700 |
| H | -4.89176400 | -3.95479200 | 0.21637600  | C     | 0.32312600  | 1.45162900  | -1.22438900 |
| H | -5.72031100 | -2.49405000 | -0.30496500 | C     | -0.16431200 | 1.31586800  | -2.53146800 |
| C | -2.37726200 | 3.18723500  | 0.66504200  | C     | 0.13005800  | 2.24112900  | -3.52554600 |
| H | -3.05792500 | 2.94141600  | 1.48141600  | C     | 0.92494800  | 3.34923200  | -3.23865200 |
| H | -1.43703200 | 3.56005500  | 1.06430500  | C     | 1.44233600  | 3.50621000  | -1.95912700 |
| H | -2.83819100 | 3.92051000  | 0.00417500  | H     | -0.79191900 | 0.46189700  | -2.77040000 |
| C | -3.37111600 | 1.35822800  | -0.64664100 | H     | -0.26813400 | 2.10422700  | -4.52586700 |
| H | -4.03404500 | 1.12920600  | 0.18894000  | H     | 1.14847100  | 4.08021200  | -4.00886400 |
| H | -3.82475800 | 2.09473800  | -1.31074800 | H     | 2.08209200  | 4.35362900  | -1.72729500 |
| H | -3.12561300 | 0.44429800  | -1.18750400 | H     | 0.80087900  | 1.71383400  | 1.04069600  |
| C | 0.93002900  | -3.14718800 | 0.12946200  | B     | 0.00504300  | 0.37720500  | -0.05637600 |
| H | 0.20625800  | -2.89881800 | 0.90870000  | N     | 1.75339700  | 2.64662700  | 0.34284600  |
| H | 0.35569700  | -3.31915900 | -0.78666400 | C     | -1.41843200 | -0.40631800 | -0.20360500 |
| H | 1.40755700  | -4.09320400 | 0.39956200  | C     | -1.62149400 | -1.71896800 | 0.22321500  |
| C | -0.57273000 | -1.46458500 | -2.51829000 | C     | -2.57009800 | 0.22314600  | -0.67782500 |
| H | -0.77116900 | -0.56311200 | -3.10929800 | C     | -2.84294900 | -2.37609300 | 0.14880500  |
| H | 0.48720900  | -1.44822400 | -2.25234800 | C     | -3.81071000 | -0.39501900 | -0.76945600 |
| H | -0.75776100 | -2.33061100 | -3.16047800 | C     | -3.94874800 | -1.71088100 | -0.35724200 |
| C | -4.16749800 | -1.81398300 | 2.05893300  | C     | 1.29117700  | -0.62997400 | 0.06263000  |
| H | -5.15890000 | -1.40694000 | 1.82588400  | C     | 1.45097000  | -1.56269100 | -0.96442300 |
| H | -4.32219700 | -2.85319600 | 2.36991500  | C     | 2.31630000  | -0.64388200 | 0.99926800  |
| H | -3.76734800 | -1.26596300 | 2.91524100  | C     | 2.51243600  | -2.44899500 | -1.05484300 |
| C | 5.28380300  | 0.71208100  | -0.32673300 | C     | 3.40670700  | -1.50780000 | 0.94985700  |
| H | 5.98711200  | 0.58530700  | 0.50418200  | C     | 3.50567300  | -2.42213700 | -0.08424000 |
| H | 5.86085900  | 0.58835500  | -1.25065500 | C     | 3.18264700  | 2.28999400  | 0.29756700  |
| H | 4.91087300  | 1.73844000  | -0.29725900 | H     | 3.56235300  | 2.17755900  | 1.31436500  |
| H | 3.50286800  | -3.58523300 | -0.09143700 | H     | 3.30249000  | 1.35096900  | -0.24256400 |
| H | 2.66104900  | 1.23342400  | -0.13572400 | H     | 3.74993000  | 3.07129700  | -0.22444600 |
| H | -2.89321500 | -2.71926000 | -2.33314000 | C     | 1.58261600  | 3.94557000  | 1.00512500  |
| H | -1.81315000 | -0.55664500 | 1.93118300  | H     | 1.92336200  | 3.85417100  | 2.03979100  |
| C | 0.59143200  | 0.62198000  | 3.95489300  | H     | 2.16430600  | 4.73272100  | 0.51073100  |
| C | 0.39850900  | 0.05481100  | 2.70114700  | H     | 0.52966900  | 4.22730600  | 1.00368000  |
| C | 0.36765600  | 0.82076400  | 1.51894000  | F     | 4.35482100  | -1.44760900 | 1.88532600  |
| C | 0.60577700  | 2.19427200  | 1.68080700  | F     | 4.53796500  | -3.25759100 | -0.15286000 |
| C | 0.80905600  | 2.78155100  | 2.93335700  | F     | 2.59160500  | -3.31887300 | -2.05962700 |
| C | 0.78684300  | 1.99810800  | 4.07985500  | F     | 0.52527500  | -1.64233400 | -1.93127700 |
| H | 0.60392000  | -0.00936500 | 4.83889800  | F     | 2.33539100  | 0.23162200  | 2.02881300  |
| H | 0.28588300  | -1.02552000 | 2.62505000  | F     | -0.61998000 | -2.42650800 | 0.76774700  |
| H | 0.67206000  | 2.82745900  | 0.79583400  | F     | -2.96145100 | -3.63509900 | 0.56974600  |
| H | 0.99918500  | 3.84939600  | 3.00686800  | F     | -5.12851600 | -2.32067700 | -0.42991100 |
| H | 0.94155000  | 2.44564900  | 5.05689000  | F     | -4.86616300 | 0.27093700  | -1.23804100 |
|   |             |             |             | F     | -2.53989700 | 1.51128600  | -1.05389500 |

|      |             |             |             |       |             |             |             |
|------|-------------|-------------|-------------|-------|-------------|-------------|-------------|
| C    | -1.36080600 | 0.66715700  | 3.60299700  | H     | 2.85986700  | -4.26871000 | 0.60259000  |
| C    | -0.36809300 | 0.48493700  | 2.65172900  | H     | 1.31842500  | -4.11970600 | -0.30041600 |
| C    | -0.30836400 | 1.28976200  | 1.49431500  | F     | 4.24824200  | 1.58203900  | -1.79638500 |
| C    | -1.27034500 | 2.31584300  | 1.36453300  | F     | 4.05982900  | 3.71801400  | -0.09530500 |
| C    | -2.25775800 | 2.51211000  | 2.31949700  | F     | 1.93712000  | 3.88150700  | 1.60364300  |
| C    | -2.30670900 | 1.67895800  | 3.43625500  | F     | 0.05378900  | 2.00512400  | 1.59624100  |
| H    | -1.40441100 | 0.02121900  | 4.47357000  | F     | 2.41973000  | -0.30568500 | -1.80226000 |
| H    | 0.34675000  | -0.31859200 | 2.78344100  | F     | -1.02967000 | 2.35506400  | -0.96453800 |
| H    | -1.25968500 | 2.93106800  | 0.46864000  | F     | -3.51878700 | 3.24879800  | -0.95301100 |
| H    | -2.99619800 | 3.29634600  | 2.19071700  | F     | -5.55123800 | 1.70816500  | 0.00244500  |
| H    | -3.08597400 | 1.81687800  | 4.17972900  | F     | -5.00602700 | -0.79414700 | 0.94442900  |
|      |             |             |             | F     | -2.51883300 | -1.72602500 | 0.93487500  |
| N3_P |             |             |             | C     | -0.41323600 | -1.65117400 | -3.74703500 |
| C    | 1.35541000  | -2.07251100 | 1.45960000  | C     | -0.16756000 | -0.85682700 | -2.63376700 |
| C    | 0.28807800  | -1.17441000 | 1.36550800  | C     | -0.24289200 | -1.36443800 | -1.32567400 |
| C    | -0.36787200 | -0.93770800 | 2.58600000  | C     | -0.62123200 | -2.70937700 | -1.19574800 |
| C    | -0.00899300 | -1.56574000 | 3.77170900  | C     | -0.86785600 | -3.51968200 | -2.30596400 |
| C    | 1.04404000  | -2.47773600 | 3.79614100  | C     | -0.75553600 | -2.99402000 | -3.58778100 |
| C    | 1.74369900  | -2.72845100 | 2.62492300  | H     | -0.34219300 | -1.22383800 | -4.74286400 |
| H    | -1.18784600 | -0.22653100 | 2.59612800  | H     | 0.07830100  | 0.19384100  | -2.77817200 |
| H    | -0.55435600 | -1.34490400 | 4.68363200  | H     | -0.76088200 | -3.12353800 | -0.19811700 |
| H    | 1.32635400  | -2.97856800 | 4.71562000  | H     | -1.16453400 | -4.55559400 | -2.16553000 |
| H    | 2.58462500  | -3.41657500 | 2.63145200  | H     | -0.94955900 | -3.61684800 | -4.45553600 |
| H    | 1.72713000  | -1.80202200 | -0.52321200 |       |             |             |             |
| B    | -0.11294100 | -0.37473700 | -0.02467000 | N4_TS |             |             |             |
| N    | 2.20442400  | -2.29021200 | 0.25314000  | C     | -2.69919300 | -1.14187600 | -0.10176100 |
| C    | -1.61810500 | 0.28766700  | 0.05691500  | C     | -1.46414300 | -1.18958500 | -0.75110200 |
| C    | -1.96361000 | 1.54015300  | -0.44416900 | C     | -1.07263800 | -2.44140500 | -1.25022300 |
| C    | -2.70515100 | -0.46968200 | 0.49170500  | C     | -1.87211900 | -3.56945900 | -1.11134400 |
| C    | -3.26226900 | 2.03416900  | -0.46557500 | C     | -3.10118100 | -3.48408500 | -0.45713200 |
| C    | -4.01813800 | -0.01698400 | 0.49652000  | C     | -3.51599800 | -2.26115200 | 0.05350400  |
| C    | -4.30042900 | 1.25133800  | 0.01384200  | H     | -0.11529700 | -2.52877500 | -1.75931600 |
| C    | 1.07274700  | 0.78131100  | -0.15257800 | H     | -1.53721500 | -4.52157600 | -1.51132900 |
| C    | 1.05761500  | 1.87290600  | 0.71948700  | H     | -3.72725300 | -4.36347500 | -0.34611000 |
| C    | 2.18946700  | 0.75084300  | -0.97792800 | H     | -4.46754700 | -2.17083100 | 0.57231100  |
| C    | 2.02606000  | 2.86396600  | 0.74916100  | H     | -1.81164800 | 0.89618800  | -0.04313900 |
| C    | 3.19702200  | 1.71150900  | -0.98372900 | B     | -0.49433700 | 0.07193900  | -1.00463400 |
| C    | 3.11066500  | 2.78657400  | -0.11696500 | N     | -3.08584000 | 0.14788300  | 0.42258000  |
| C    | 3.55616400  | -1.67691200 | 0.42839100  | C     | 0.99441100  | -0.19075100 | -0.45776800 |
| H    | 4.06647700  | -1.66684700 | -0.53469900 | C     | 2.12325300  | 0.00924500  | -1.24499600 |
| H    | 3.42237100  | -0.66211700 | 0.79948400  | C     | 1.23721900  | -0.68703400 | 0.81966900  |
| H    | 4.10875600  | -2.27035400 | 1.15671400  | C     | 3.41279300  | -0.26419400 | -0.79922300 |
| C    | 2.31970700  | -3.71755100 | -0.16596300 | C     | 2.50401500  | -0.96290100 | 1.30932200  |
| H    | 2.86664300  | -3.75161100 | -1.10907000 | C     | 3.60224100  | -0.75343000 | 0.48439700  |

|      |             |             |             |       |             |             |             |
|------|-------------|-------------|-------------|-------|-------------|-------------|-------------|
| C    | -4.25395900 | 0.74020500  | -0.22111500 | C     | 2.78563500  | -1.11458600 | 0.95836400  |
| H    | -4.33799300 | 1.78703900  | 0.08730000  | C     | 3.81998700  | -0.35063800 | 0.44420900  |
| H    | -4.12232600 | 0.69765300  | -1.30454600 | C     | -3.92118000 | 0.29203700  | 0.94241700  |
| H    | -5.18270200 | 0.21567500  | 0.04326500  | H     | -3.95303800 | 1.16916100  | 1.59102900  |
| C    | -3.14032700 | 0.20533100  | 1.88131300  | H     | -4.14158500 | 0.58073800  | -0.08411700 |
| H    | -3.19499200 | 1.25324600  | 2.19404800  | H     | -4.62422000 | -0.46687500 | 1.28682600  |
| H    | -4.00952500 | -0.33316000 | 2.28374800  | C     | -2.13039300 | -0.68128500 | 2.34407500  |
| H    | -2.22794100 | -0.24062000 | 2.28240100  | H     | -2.20703800 | 0.18384500  | 3.00533200  |
| F    | 2.00899500  | 0.48074100  | -2.49053000 | H     | -2.79052500 | -1.47991700 | 2.68473600  |
| F    | 4.46565500  | -0.06183400 | -1.59093300 | H     | -1.10344800 | -1.03859800 | 2.29003400  |
| F    | 4.82949900  | -1.01477000 | 0.92728500  | F     | 2.04237000  | 1.65733600  | -1.94550400 |
| F    | 2.68093400  | -1.42112500 | 2.54909800  | F     | 4.53315200  | 1.33024800  | -1.03921600 |
| F    | 0.20446600  | -0.88150600 | 1.66442600  | F     | 5.06378900  | -0.50248700 | 0.89849200  |
| H    | -0.52247100 | 0.42730300  | -2.14747500 | F     | 3.02729200  | -2.00836200 | 1.92158100  |
| C    | -0.88354600 | 4.08295000  | -0.88938600 | F     | 0.54628400  | -1.70305800 | 1.04141200  |
| C    | -1.22765700 | 2.75885200  | -1.13390800 | H     | -0.20581100 | 0.42130000  | -2.34173900 |
| C    | -0.95488000 | 1.75316200  | -0.19204000 | C     | -2.67165600 | 3.37453600  | -0.58600600 |
| C    | -0.36909800 | 2.13067800  | 1.03041800  | C     | -2.04993900 | 2.25591900  | -1.13348600 |
| C    | -0.02253000 | 3.45181400  | 1.27948600  | C     | -0.95255300 | 1.62658400  | -0.51208300 |
| C    | -0.27507800 | 4.42795400  | 0.31573900  | C     | -0.51040500 | 2.20119700  | 0.69356500  |
| H    | -1.08086400 | 4.84456700  | -1.63672100 | C     | -1.13049400 | 3.31866200  | 1.25920700  |
| H    | -1.69174700 | 2.48569600  | -2.07731300 | C     | -2.21780700 | 3.90751300  | 0.62219900  |
| H    | -0.17808000 | 1.37139300  | 1.78349600  | H     | -3.50765800 | 3.83917300  | -1.10167100 |
| H    | 0.44425900  | 3.72469200  | 2.22042500  | H     | -2.41072600 | 1.85137000  | -2.07769700 |
| H    | 0.00045900  | 5.46064300  | 0.50684800  | H     | 0.34602000  | 1.75966000  | 1.20111200  |
| N4_P |             |             |             | H     | -0.75432100 | 3.73455300  | 2.18975800  |
| C    | -2.29768800 | -1.30786300 | -0.05355100 | H     | -2.69959300 | 4.78024800  | 1.05207800  |
| C    | -1.29783400 | -1.06719900 | -0.99595800 | N5_TS |             |             |             |
| C    | -1.11829300 | -2.11959600 | -1.91334400 | B     | -0.37095300 | -0.08206600 | -0.19334500 |
| C    | -1.86239500 | -3.29141400 | -1.88060400 | C     | 0.63672500  | -0.50454700 | -1.40134400 |
| C    | -2.85269400 | -3.46923900 | -0.91383300 | C     | -0.00335900 | -0.84311700 | -2.60743500 |
| C    | -3.07458100 | -2.46225400 | 0.01328300  | H     | -1.08797700 | -0.77446400 | -2.65253900 |
| H    | -0.35838000 | -1.99163500 | -2.67944300 | C     | 0.67945600  | -1.24988700 | -3.74231900 |
| H    | -1.67883400 | -4.07083800 | -2.61370800 | H     | 0.13450500  | -1.49341300 | -4.64867100 |
| H    | -3.44345500 | -4.37823800 | -0.88304700 | C     | 2.06690500  | -1.34604900 | -3.70374500 |
| H    | -3.83731400 | -2.58312200 | 0.77853100  | H     | 2.62663800  | -1.66691500 | -4.57634500 |
| H    | -1.91708000 | 0.51828300  | 0.70236700  | C     | 2.73721200  | -1.02068200 | -2.53426000 |
| B    | -0.32631800 | 0.25495200  | -1.14695100 | H     | 3.81611700  | -1.09167700 | -2.51226800 |
| N    | -2.54241100 | -0.26492900 | 0.97559600  | C     | 2.04148300  | -0.60069600 | -1.39074100 |
| C    | 1.16533300  | -0.02598500 | -0.53321600 | N     | 2.76817100  | -0.24918000 | -0.17232400 |
| C    | 2.24143000  | 0.72699100  | -1.00491200 | C     | 3.61945200  | -1.35186700 | 0.44143400  |
| C    | 1.49785500  | -0.93108300 | 0.46548700  | C     | 4.00983800  | -0.87437000 | 1.85032500  |
| C    | 3.54425500  | 0.58229400  | -0.54676200 | H     | 3.09419300  | -0.75412000 | 2.44571900  |

|   |             |             |             |      |             |             |             |
|---|-------------|-------------|-------------|------|-------------|-------------|-------------|
| H | 4.59895900  | -1.66569900 | 2.32612700  | C    | -1.21963800 | -2.58552200 | -0.11957100 |
| C | 4.76999000  | 0.44393600  | 1.83381100  | F    | 0.07498800  | -2.94825100 | -0.09386400 |
| H | 5.71743300  | 0.33107900  | 1.29261400  | H    | 1.47090000  | -0.15029300 | 0.71132600  |
| H | 5.02954600  | 0.74535800  | 2.85327500  | C    | 0.50135200  | -0.04463000 | 1.52418100  |
| C | 3.89278400  | 1.50911800  | 1.18715800  | C    | 0.21743900  | -1.16407600 | 2.34156400  |
| H | 4.42334100  | 2.46529200  | 1.11445800  | C    | 0.04035000  | -1.06152100 | 3.71444500  |
| H | 3.02233600  | 1.67537000  | 1.82969200  | C    | 0.16734300  | 0.17525600  | 4.34120200  |
| C | 3.41701500  | 1.13373000  | -0.22717900 | C    | 0.45768600  | 1.30694600  | 3.58184700  |
| C | 4.59997000  | 1.30072500  | -1.20403900 | C    | 0.61064500  | 1.19085500  | 2.20950000  |
| H | 5.54337500  | 0.90650900  | -0.82794900 | H    | 0.11506400  | -2.14312900 | 1.89213900  |
| H | 4.74728900  | 2.37497600  | -1.35087200 | H    | -0.19784600 | -1.94626400 | 4.29532400  |
| H | 4.38926300  | 0.87214000  | -2.18453300 | H    | 0.03376600  | 0.25916600  | 5.41548600  |
| C | 2.36343600  | 2.13822300  | -0.69320700 | H    | 0.55130700  | 2.27728700  | 4.05812700  |
| H | 1.42203400  | 2.01819000  | -0.16261700 | H    | 0.80911700  | 2.09873600  | 1.64874800  |
| H | 2.15664300  | 2.03509100  | -1.75973500 |      |             |             |             |
| H | 2.73426900  | 3.15081800  | -0.50828100 | N5_P |             |             |             |
| C | 4.88281100  | -1.77257900 | -0.34339700 | B    | 0.46751600  | -0.06955800 | -0.04492900 |
| H | 4.62224000  | -2.42539400 | -1.17855200 | C    | -0.48921800 | -0.48533600 | 1.27885800  |
| H | 5.51114500  | -2.36037400 | 0.33333500  | C    | 0.24995600  | -0.76397300 | 2.44984300  |
| H | 5.48963500  | -0.95556300 | -0.72313300 | H    | 1.33065400  | -0.66663000 | 2.39841900  |
| C | 2.79280500  | -2.62812400 | 0.58125400  | C    | -0.31240300 | -1.13414500 | 3.65863700  |
| H | 1.96119600  | -2.49915300 | 1.26813200  | H    | 0.32429800  | -1.32828400 | 4.51585600  |
| H | 3.44127400  | -3.41122400 | 0.98539400  | C    | -1.69510600 | -1.25725400 | 3.76674900  |
| H | 2.40706500  | -2.96647300 | -0.38170300 | H    | -2.16147200 | -1.55612600 | 4.69935500  |
| C | -0.99652600 | 1.42611700  | -0.30055900 | C    | -2.47591700 | -0.98538400 | 2.65703200  |
| C | -0.81993100 | 2.31018000  | -1.36236000 | H    | -3.55055100 | -1.07649000 | 2.73147100  |
| F | -0.07676700 | 1.99164700  | -2.43051700 | C    | -1.87667100 | -0.60302300 | 1.45046100  |
| C | -1.37333100 | 3.58929600  | -1.39963300 | N    | -2.78775100 | -0.29827200 | 0.31179400  |
| F | -1.14860900 | 4.38825300  | -2.44292200 | C    | -3.61463900 | -1.49916500 | -0.24290800 |
| C | -2.15818000 | 4.02919300  | -0.34972700 | C    | -4.11901300 | -1.03044100 | -1.61534300 |
| F | -2.69469000 | 5.24530300  | -0.36856400 | H    | -3.25013300 | -0.86435400 | -2.26947200 |
| C | -2.38490500 | 3.17907900  | 0.72611900  | H    | -4.69275000 | -1.85224300 | -2.05555500 |
| F | -3.15716500 | 3.57902000  | 1.73645700  | C    | -4.95310000 | 0.24463800  | -1.54190300 |
| C | -1.82048500 | 1.91639800  | 0.71795000  | H    | -5.85697100 | 0.07680000  | -0.94381800 |
| F | -2.11907300 | 1.12888000  | 1.75992300  | H    | -5.29152000 | 0.52195200  | -2.54420300 |
| C | -1.55865000 | -1.22952300 | -0.10902600 | C    | -4.11354300 | 1.37963200  | -0.96217700 |
| C | -2.93869600 | -1.01615300 | -0.18204300 | H    | -4.70444300 | 2.29692500  | -0.86863400 |
| F | -3.47673700 | 0.20533500  | -0.27868600 | H    | -3.29073200 | 1.59664100  | -1.65254600 |
| C | -3.88395800 | -2.04053400 | -0.19947900 | C    | -3.52705100 | 1.07789000  | 0.42497300  |
| F | -5.18139100 | -1.74685900 | -0.27009200 | C    | -4.62040100 | 1.15077800  | 1.49403500  |
| C | -3.47964300 | -3.36231300 | -0.16849000 | H    | -5.55184500 | 0.66196700  | 1.21329400  |
| F | -4.36995100 | -4.34867500 | -0.18449100 | H    | -4.84746700 | 2.21312500  | 1.61963100  |
| C | -2.12123700 | -3.63747700 | -0.12767500 | H    | -4.28511600 | 0.78418700  | 2.46365500  |
| F | -1.69307100 | -4.89949700 | -0.10913900 | C    | -2.46718800 | 2.11530100  | 0.78648400  |

|   |             |             |             |       |             |             |             |
|---|-------------|-------------|-------------|-------|-------------|-------------|-------------|
| H | -1.58709700 | 2.04077500  | 0.14718100  | H     | -0.74069000 | 1.97284600  | -1.65399600 |
| H | -2.13961100 | 2.01637300  | 1.82190700  |       |             |             |             |
| H | -2.90402800 | 3.10808200  | 0.64729200  | N6_TS |             |             |             |
| C | -4.76550300 | -1.96029200 | 0.65485800  | C     | -1.27161100 | -1.80256900 | -0.17093500 |
| H | -4.39527800 | -2.48218600 | 1.53766500  | C     | -1.66576500 | -0.46804700 | -0.00896200 |
| H | -5.33771200 | -2.68800800 | 0.07210200  | C     | -3.01301300 | -0.11849600 | 0.14768700  |
| H | -5.45518400 | -1.18100900 | 0.96477000  | C     | -3.99337000 | -1.10266000 | 0.15095600  |
| C | -2.67468600 | -2.68682900 | -0.41615300 | C     | -3.62718800 | -2.43858300 | 0.00359500  |
| H | -1.85427600 | -2.46168700 | -1.09428300 | C     | -2.28859200 | -2.77058700 | -0.15076500 |
| H | -3.25674300 | -3.50799300 | -0.84448000 | H     | -3.30819700 | 0.91621500  | 0.26344600  |
| H | -2.25910000 | -3.01630300 | 0.53729300  | H     | -5.03565700 | -0.82493800 | 0.27110500  |
| C | 1.04762600  | 1.47538400  | 0.14968600  | H     | -4.38569900 | -3.21580400 | 0.01182100  |
| C | 0.83681200  | 2.34788500  | 1.21353600  | H     | -2.00728700 | -3.81474900 | -0.26366500 |
| F | 0.11664000  | 1.99475800  | 2.29512900  | C     | -0.49655800 | 1.36479100  | -1.25192300 |
| C | 1.32046100  | 3.65517200  | 1.25787200  | C     | -0.37758600 | 1.21374000  | 1.33225100  |
| F | 1.06051400  | 4.43270600  | 2.31204300  | C     | 0.85571400  | 2.09909300  | -1.22813400 |
| C | 2.06955800  | 4.14594100  | 0.20561800  | C     | 0.99885900  | 1.89792800  | 1.26532000  |
| F | 2.54382200  | 5.38970200  | 0.23081800  | C     | 1.11852800  | 2.84887200  | 0.07575400  |
| C | 2.32213300  | 3.31747900  | -0.88050000 | H     | 0.87805500  | 2.78737000  | -2.08073100 |
| F | 3.05344600  | 3.76813900  | -1.90043700 | H     | 1.66057400  | 1.37500800  | -1.38185800 |
| C | 1.81910900  | 2.02740500  | -0.87951400 | H     | 1.15797800  | 2.43589600  | 2.20662400  |
| F | 2.13104000  | 1.27777400  | -1.94413900 | H     | 1.78045600  | 1.13283700  | 1.19603000  |
| C | 1.71954700  | -1.17632400 | -0.00379900 | H     | 2.12205800  | 3.28488900  | 0.05031100  |
| C | 3.09146500  | -0.91975400 | 0.01070800  | H     | 0.42244700  | 3.68854300  | 0.18496100  |
| F | 3.58868300  | 0.32449100  | 0.00335900  | N     | -0.58515000 | 0.51504000  | 0.00148100  |
| C | 4.06862700  | -1.91249100 | 0.06814400  | C     | -1.62617100 | 2.39139600  | -1.44749800 |
| F | 5.35961500  | -1.58032400 | 0.07864900  | H     | -2.61126200 | 1.93066600  | -1.36629500 |
| C | 3.70353000  | -3.24460100 | 0.13623500  | H     | -1.57119800 | 3.24344700  | -0.77189700 |
| F | 4.62529300  | -4.20275000 | 0.19748700  | H     | -1.53764500 | 2.78308900  | -2.46576300 |
| C | 2.35376400  | -3.56113200 | 0.14787300  | C     | -0.56214000 | 0.42353300  | -2.46276200 |
| F | 1.96554600  | -4.83536400 | 0.23013100  | H     | -0.21578900 | 0.96298000  | -3.34958000 |
| C | 1.42096200  | -2.53758200 | 0.08861000  | H     | 0.04820400  | -0.46958100 | -2.33096400 |
| F | 0.13313100  | -2.94009400 | 0.12275400  | H     | -1.58746600 | 0.08970100  | -2.64281800 |
| H | -2.12633200 | -0.12407000 | -0.46455900 | C     | -1.43518100 | 2.25373400  | 1.74892700  |
| C | -0.23420200 | -0.12582100 | -1.55730100 | H     | -2.43436900 | 1.82066200  | 1.79522000  |
| C | -0.23871200 | -1.28222600 | -2.36141100 | H     | -1.18247900 | 2.57676600  | 2.76425500  |
| C | -0.77303200 | -1.30994700 | -3.64788200 | H     | -1.46306900 | 3.14604600  | 1.12719800  |
| C | -1.32919200 | -0.16185200 | -4.20617100 | C     | -0.39740400 | 0.14342700  | 2.43159500  |
| C | -1.32112500 | 1.01027700  | -3.45859200 | H     | 0.13668900  | -0.75663400 | 2.13752200  |
| C | -0.78032500 | 1.01760400  | -2.17200400 | H     | 0.06700300  | 0.54909900  | 3.33524300  |
| H | 0.19779700  | -2.19992400 | -1.98311200 | H     | -1.42212200 | -0.15138400 | 2.67115000  |
| H | -0.74025100 | -2.23227300 | -4.22059300 | B     | 0.22282300  | -2.32696400 | -0.45191700 |
| H | -1.73718100 | -0.17619400 | -5.21194100 | H     | 0.54032900  | -0.50559500 | -0.09577500 |
| H | -1.71427600 | 1.93158100  | -3.88008500 | H     | 0.38077900  | -2.56454600 | -1.62574500 |

|      |             |             |             |       |             |             |             |
|------|-------------|-------------|-------------|-------|-------------|-------------|-------------|
| H    | 0.50227600  | -3.25843400 | 0.25838700  | C     | -1.05980000 | 2.19877300  | 1.97136300  |
| C    | 3.69861700  | -1.28754900 | 1.22128000  | H     | -2.07052300 | 1.81397500  | 2.10273200  |
| C    | 4.46673400  | -0.93666000 | 0.11276000  | H     | -0.67641200 | 2.43017200  | 2.96955400  |
| C    | 3.85009000  | -0.76326900 | -1.12345100 | H     | -1.09694400 | 3.13395900  | 1.41867800  |
| C    | 2.47312200  | -0.91601200 | -1.23650900 | C     | -0.07354300 | -0.02752100 | 2.36561000  |
| C    | 1.65479400  | -1.23072000 | -0.13313300 | H     | 0.49765900  | -0.86348300 | 1.96446400  |
| C    | 2.32299700  | -1.43084200 | 1.09318400  | H     | 0.41780300  | 0.31436700  | 3.28101600  |
| H    | 4.17456600  | -1.46243200 | 2.18091500  | H     | -1.07838300 | -0.37431600 | 2.61555900  |
| H    | 5.54199200  | -0.81969400 | 0.20851100  | B     | 0.09964400  | -2.36058300 | -0.95297200 |
| H    | 4.44245300  | -0.52097600 | -2.00005100 | H     | 0.28124200  | -0.02772200 | -0.22119200 |
| H    | 2.02040500  | -0.80277600 | -2.21709500 | H     | -0.00441200 | -2.25340300 | -2.16663900 |
| H    | 1.75865700  | -1.74923500 | 1.96333900  | H     | 0.08330900  | -3.53922700 | -0.65744800 |
| N6_P |             |             |             | C     | 3.36766700  | -1.63718700 | 1.16075100  |
| C    | -1.30293400 | -1.73011000 | -0.33309100 | C     | 4.13149300  | -0.83918200 | 0.30741000  |
| C    | -1.63647200 | -0.41286600 | 0.01560500  | C     | 3.63098600  | -0.52888000 | -0.95282400 |
| C    | -2.91944000 | 0.00270000  | 0.38434500  | C     | 2.36856300  | -0.99084200 | -1.33646500 |
| C    | -3.94725800 | -0.92710200 | 0.43224600  | C     | 1.54914600  | -1.76080900 | -0.49202800 |
| C    | -3.67171400 | -2.25607600 | 0.11389500  | C     | 2.11386300  | -2.08696100 | 0.75693800  |
| C    | -2.38758600 | -2.62929900 | -0.25399900 | H     | 3.75921000  | -1.91936100 | 2.13445800  |
| H    | -3.12706500 | 1.03567600  | 0.63219800  | H     | 5.11226100  | -0.48806700 | 0.61368600  |
| H    | -4.94599800 | -0.61603800 | 0.71962500  | H     | 4.22737200  | 0.06016300  | -1.64516600 |
| H    | -4.46271500 | -2.99907500 | 0.15604700  | H     | 2.01761200  | -0.77154300 | -2.34426300 |
| H    | -2.18638100 | -3.66693600 | -0.50336200 | H     | 1.54735400  | -2.73674800 | 1.42271100  |
| C    | -0.52882200 | 1.56060200  | -1.20387900 | N8_TS |             |             |             |
| C    | -0.11557300 | 1.14674000  | 1.38787200  | C     | 4.70857400  | -2.51068100 | -1.83081700 |
| C    | 0.86810200  | 2.20077700  | -1.24900400 | H     | 4.87895100  | -2.52377900 | -2.91209900 |
| C    | 1.29259300  | 1.72239800  | 1.18099600  | H     | 4.86405300  | -3.53281600 | -1.47371200 |
| C    | 1.34399700  | 2.78181100  | 0.08108500  | C     | 5.65466100  | -1.49853700 | -1.12185100 |
| H    | 0.84659800  | 2.97297000  | -2.02557300 | H     | 6.21839100  | -1.98002400 | -0.31638300 |
| H    | 1.58545100  | 1.43895700  | -1.57325600 | H     | 6.38892700  | -1.06938600 | -1.80975000 |
| H    | 1.62566400  | 2.13998100  | 2.13686400  | C     | 5.00679400  | 0.73975300  | 0.08076500  |
| H    | 1.98034700  | 0.89969800  | 0.93645400  | H     | 6.02219900  | 1.06972600  | 0.27680200  |
| H    | 2.37257400  | 3.13610300  | -0.03335800 | C     | 3.91219100  | 1.56117700  | 0.43779300  |
| H    | 0.74688500  | 3.65747200  | 0.36107100  | H     | 4.11762200  | 2.53981200  | 0.86220600  |
| N    | -0.52748600 | 0.58121600  | 0.00055600  | C     | 2.60113400  | 1.19080000  | 0.22455600  |
| C    | -1.62747400 | 2.62148300  | -1.15234200 | C     | 0.93871700  | -0.67314900 | -0.52715300 |
| H    | -2.61218000 | 2.18177300  | -0.99127200 | C     | 0.93854900  | -1.81893300 | -1.32069600 |
| H    | -1.45536500 | 3.41054400  | -0.42243600 | H     | -0.01871500 | -2.27547200 | -1.54676400 |
| H    | -1.64721000 | 3.09511700  | -2.13805800 | C     | 2.07470300  | -2.49215700 | -1.82990200 |
| C    | -0.74977900 | 0.71356500  | -2.45841100 | H     | 1.93995000  | -3.38998400 | -2.42702100 |
| H    | -0.52847500 | 1.33582800  | -3.33017800 | C     | 4.73241300  | -0.43745500 | -0.55965800 |
| H    | -0.10649900 | -0.16860400 | -2.48119300 | C     | 2.25157900  | -0.08145800 | -0.34156300 |
| H    | -1.78469500 | 0.37009100  | -2.52718800 | C     | 3.31512000  | -2.01518000 | -1.51209600 |

|   |             |             |             |      |             |             |             |
|---|-------------|-------------|-------------|------|-------------|-------------|-------------|
| C | 3.38626400  | -0.81282900 | -0.77940500 | H    | -4.04085300 | -5.36993200 | -1.74157400 |
| C | 1.60075500  | 2.86296000  | 1.74151700  | C    | -0.34609900 | -3.13254700 | 1.18396000  |
| H | 1.57088500  | 2.12918200  | 2.54654800  | H    | -0.10929700 | -4.18012500 | 0.97590200  |
| H | 0.72865400  | 3.51714900  | 1.81048800  | H    | -0.63445500 | -3.05782100 | 2.23866800  |
| H | 2.49911600  | 3.48467200  | 1.83641800  | H    | 0.56505100  | -2.55517900 | 1.06104700  |
| C | 1.58739400  | 3.19298200  | -0.63370600 | B    | -0.50994400 | -0.26670800 | 0.21294300  |
| H | 2.48083100  | 3.82206700  | -0.54402000 | N    | 1.55701200  | 2.18014000  | 0.43920200  |
| H | 0.68735200  | 3.81212200  | -0.56206600 | H    | 0.23415900  | 1.57283500  | 0.15911800  |
| H | 1.59903000  | 2.69391600  | -1.60334700 | C    | -0.41966700 | -0.30182000 | 1.84841100  |
| C | -0.93997100 | 1.52436400  | -0.30422900 | C    | 0.76802600  | -0.25172300 | 2.59129800  |
| C | -1.68234900 | 2.44402200  | 0.50629800  | C    | 0.78192700  | -0.32069300 | 3.98573700  |
| C | -2.44348200 | 3.45848100  | -0.07868800 | C    | -0.40750100 | -0.46487300 | 4.69156500  |
| H | -3.00139300 | 4.13307500  | 0.56778800  | C    | -1.60331400 | -0.56206300 | 3.98254600  |
| C | -2.48753000 | 3.65352500  | -1.45433300 | C    | -1.59826100 | -0.48969400 | 2.59375500  |
| C | -1.72690500 | 2.80324600  | -2.25325500 | H    | 1.72327900  | -0.18670600 | 2.07909200  |
| H | -1.73704900 | 2.94795600  | -3.33137400 | H    | 1.72894100  | -0.28026800 | 4.51752900  |
| C | -0.97596000 | 1.76070000  | -1.71964300 | H    | -0.40208800 | -0.52421200 | 5.77574100  |
| C | -1.69620800 | 2.45579800  | 2.01952900  | H    | -2.54108000 | -0.70281600 | 4.51280400  |
| H | -0.81378700 | 2.01604200  | 2.47567900  | H    | -2.54228000 | -0.58529700 | 2.06120100  |
| H | -2.55324100 | 1.88651100  | 2.39216500  |      |             |             |             |
| H | -1.80624700 | 3.48553900  | 2.37265600  | N8_P |             |             |             |
| C | -3.33168400 | 4.73900400  | -2.06354500 | C    | 4.03179200  | -3.38513100 | -1.82971100 |
| H | -2.84660800 | 5.17264400  | -2.94163100 | H    | 4.21839900  | -3.39674300 | -2.90824700 |
| H | -3.53380800 | 5.53700100  | -1.34571500 | H    | 3.95433400  | -4.42833400 | -1.51038200 |
| H | -4.29456700 | 4.33099100  | -2.38842400 | C    | 5.15860700  | -2.62894000 | -1.06956300 |
| C | -0.27711300 | 0.88132400  | -2.72728100 | H    | 5.59281600  | -3.24936300 | -0.27925000 |
| H | -0.44204400 | 1.26690100  | -3.73614100 | H    | 5.98001300  | -2.33685000 | -1.73014900 |
| H | -0.67246300 | -0.13844000 | -2.67464100 | C    | 4.99493500  | -0.36410200 | 0.22905000  |
| H | 0.79801600  | 0.80084500  | -2.55737700 | H    | 6.05248500  | -0.27886300 | 0.45505400  |
| C | -1.72125400 | -1.35666900 | -0.18495400 | C    | 4.10173400  | 0.66097600  | 0.61591000  |
| C | -2.94189000 | -1.16563100 | -0.87904700 | H    | 4.50675600  | 1.54809100  | 1.09327400  |
| C | -3.81333400 | -2.23885300 | -1.13345900 | C    | 2.75290000  | 0.57839700  | 0.36795700  |
| H | -4.73385300 | -2.03684900 | -1.67783900 | C    | 0.70937700  | -0.80218200 | -0.51585500 |
| C | -3.55797600 | -3.53187000 | -0.71918600 | C    | 0.49407400  | -1.90571300 | -1.34329700 |
| C | -2.39166500 | -3.72640700 | 0.01181000  | H    | -0.53273100 | -2.14099100 | -1.59941400 |
| H | -2.16703800 | -4.72251300 | 0.39087200  | C    | 1.46509900  | -2.79473400 | -1.85570700 |
| C | -1.50286800 | -2.69210400 | 0.29787300  | H    | 1.15036900  | -3.62481100 | -2.48223400 |
| C | -3.47534600 | 0.15421300  | -1.40126500 | C    | 4.47602800  | -1.41795700 | -0.47129400 |
| H | -3.02071500 | 0.43295500  | -2.35534600 | C    | 2.11761900  | -0.53507300 | -0.28116900 |
| H | -3.33525400 | 0.98098500  | -0.70692500 | C    | 2.77431100  | -2.60853100 | -1.50908700 |
| H | -4.54924500 | 0.05971200  | -1.58048500 | C    | 3.08493000  | -1.47827800 | -0.72992500 |
| C | -4.49163400 | -4.67272900 | -1.02750600 | C    | 2.11941300  | 2.42183700  | 1.96601400  |
| H | -5.42814700 | -4.31105500 | -1.45921000 | H    | 1.91188200  | 1.67367500  | 2.72978500  |
| H | -4.73128300 | -5.24317400 | -0.12507600 | H    | 1.39975000  | 3.23937900  | 2.02954300  |

|   |             |             |             |        |             |             |             |
|---|-------------|-------------|-------------|--------|-------------|-------------|-------------|
| H | 3.13118300  | 2.81386500  | 2.06055900  | H      | -0.07536200 | -2.59895000 | 0.98329200  |
| C | 2.20765800  | 2.79695400  | -0.45881900 | B      | -0.68749800 | -0.06379100 | 0.17348400  |
| H | 3.23483300  | 3.14862200  | -0.35796700 | N      | 1.95698600  | 1.79424400  | 0.62439300  |
| H | 1.48811300  | 3.60920500  | -0.35011800 | H      | 0.95512900  | 1.53340500  | 0.52539200  |
| H | 2.06484900  | 2.29976800  | -1.41645400 | C      | -0.61303200 | -0.20565300 | 1.82964400  |
| C | -0.77244300 | 1.54552100  | -0.37819400 | C      | 0.53944100  | -0.44174500 | 2.59339400  |
| C | -1.00557200 | 2.71216200  | 0.41288500  | C      | 0.51538000  | -0.57354100 | 3.98632000  |
| C | -1.05247500 | 3.99141300  | -0.16641300 | C      | -0.68754500 | -0.49495300 | 4.67491800  |
| H | -1.25101400 | 4.84681100  | 0.47737600  | C      | -1.86291700 | -0.31261300 | 3.94582200  |
| C | -0.88318800 | 4.20704100  | -1.52711500 | C      | -1.81647800 | -0.18304700 | 2.56379900  |
| C | -0.66564800 | 3.08105200  | -2.31245400 | H      | 1.49842500  | -0.57962400 | 2.10224400  |
| H | -0.55350400 | 3.20350600  | -3.38891800 | H      | 1.44110300  | -0.76301500 | 4.52423300  |
| C | -0.61873700 | 1.79195200  | -1.77642200 | H      | -0.71640400 | -0.60212200 | 5.75499300  |
| C | -1.29639200 | 2.71176900  | 1.90413800  | H      | -2.82043400 | -0.28138700 | 4.45859400  |
| H | -0.59213100 | 2.13542800  | 2.50437500  | H      | -2.75279600 | -0.06453700 | 2.02277700  |
| H | -2.28040000 | 2.28068000  | 2.10712000  |        |             |             |             |
| H | -1.30514300 | 3.74032400  | 2.27654300  | N10_TS |             |             |             |
| C | -0.97371100 | 5.58399300  | -2.13163500 | C      | 5.22239900  | -1.35648700 | -0.27497500 |
| H | -0.21720300 | 5.72808900  | -2.90807500 | H      | 6.25140800  | -1.62592000 | -0.06288600 |
| H | -0.84095500 | 6.36032700  | -1.37407700 | C      | 4.21815300  | -1.59767400 | 0.68458700  |
| H | -1.95196800 | 5.74005700  | -2.59783800 | H      | 4.48288400  | -2.08376800 | 1.61806800  |
| C | -0.49026100 | 0.68524300  | -2.80215000 | C      | 2.91078800  | -1.25471600 | 0.44252800  |
| H | -0.80775100 | 1.05518000  | -3.78090100 | C      | 1.15423300  | -0.12734400 | -1.02669600 |
| H | -1.11437400 | -0.17141600 | -2.54145400 | C      | 0.96057900  | 0.42258200  | -2.28758700 |
| H | 0.53614900  | 0.31949200  | -2.89804900 | H      | -0.02257700 | 0.81225500  | -2.53248200 |
| C | -2.06223300 | -0.95830200 | -0.21691000 | C      | 1.94886100  | 0.52998000  | -3.28191900 |
| C | -3.24600200 | -0.47130600 | -0.84017000 | H      | 1.69570900  | 0.96664300  | -4.24311000 |
| C | -4.30710700 | -1.33093800 | -1.15466300 | C      | 4.86705500  | -0.81115500 | -1.47511800 |
| H | -5.18447200 | -0.91309100 | -1.64617000 | C      | 2.48781900  | -0.61411700 | -0.76731600 |
| C | -4.29266100 | -2.68529900 | -0.85664700 | C      | 3.22453400  | 0.11926400  | -3.01313500 |
| C | -3.18506500 | -3.15489100 | -0.16626600 | C      | 3.52311000  | -0.44236600 | -1.75139100 |
| H | -3.15496700 | -4.20104100 | 0.13566700  | C      | 1.52485300  | -3.04496600 | 1.23938800  |
| C | -2.11102500 | -2.32931700 | 0.17767200  | H      | 1.08888500  | -3.18546000 | 0.24933500  |
| C | -3.53278000 | 0.98349800  | -1.17052800 | H      | 0.79170400  | -3.31588700 | 2.00133500  |
| H | -3.01279400 | 1.33443800  | -2.06562900 | H      | 2.40924200  | -3.68495500 | 1.33965300  |
| H | -3.25857700 | 1.65737300  | -0.35784900 | C      | 2.28742100  | -1.40611700 | 2.82458100  |
| H | -4.60400200 | 1.10345400  | -1.35167800 | H      | 3.01345900  | -2.15036000 | 3.16926800  |
| C | -5.44644000 | -3.58261400 | -1.22363100 | H      | 1.38382100  | -1.48549300 | 3.43608500  |
| H | -6.35311000 | -3.30609200 | -0.67546600 | H      | 2.71219800  | -0.40771200 | 2.93573100  |
| H | -5.22243600 | -4.62727400 | -0.99374800 | C      | -0.35181000 | 1.76115100  | -0.11651200 |
| H | -5.67913000 | -3.51320100 | -2.29077400 | C      | -1.28794100 | 2.53437300  | -0.85647500 |
| C | -1.07284200 | -3.02189900 | 1.04567700  | C      | -1.30011100 | 3.93120400  | -0.75558700 |
| H | -1.01007100 | -4.08070000 | 0.77513100  | H      | -2.04596300 | 4.48170400  | -1.32704400 |
| H | -1.37874200 | -2.96380000 | 2.09725800  | C      | -0.40305700 | 4.63979700  | 0.02996900  |



|   |             |             |             |       |             |             |             |
|---|-------------|-------------|-------------|-------|-------------|-------------|-------------|
| C | 0.58798400  | 3.89952400  | 0.66210400  | C     | -1.14859500 | -1.67571200 | 1.98164500  |
| H | 1.36357300  | 4.41907800  | 1.22302300  | C     | -0.44534600 | -0.47618300 | 1.72561600  |
| C | 0.64597300  | 2.50900700  | 0.56569400  | H     | 0.02428300  | 1.43800400  | 2.61976000  |
| C | -2.31536800 | 1.99205300  | -1.83625500 | H     | -1.15744900 | 1.04212900  | 4.71001400  |
| H | -2.03657700 | 1.04532900  | -2.29522500 | H     | -2.32703000 | -1.11162000 | 5.11494700  |
| H | -2.46043700 | 2.72704300  | -2.63291800 | H     | -2.33017800 | -2.85271300 | 3.33282500  |
| H | -3.28847300 | 1.83296200  | -1.36159800 | H     | -1.20134600 | -2.42831600 | 1.19984000  |
| C | -0.48358400 | 6.13685100  | 0.17258000  |       |             |             |             |
| H | 0.50849600  | 6.57633600  | 0.30683300  | N10_P |             |             |             |
| H | -1.08685000 | 6.41679000  | 1.04300800  | C     | 5.25459700  | -0.75102800 | -0.97687500 |
| H | -0.94412800 | 6.59436200  | -0.70681200 | H     | 6.32493900  | -0.91677100 | -0.93813700 |
| C | 1.90175000  | 1.89252400  | 1.14685000  | C     | 4.42527700  | -1.23555300 | 0.05297300  |
| H | 2.69393800  | 1.87698100  | 0.39009600  | H     | 4.86084200  | -1.80551900 | 0.86795200  |
| H | 1.77143700  | 0.86809000  | 1.48421700  | C     | 3.07453500  | -1.01015500 | 0.01256100  |
| H | 2.26274400  | 2.48185900  | 1.99586800  | C     | 0.98102000  | 0.05110700  | -1.04037800 |
| C | -1.55767900 | -0.76008100 | -0.70128700 | C     | 0.57596200  | 0.67836600  | -2.21456100 |
| C | -2.86695000 | -0.46553700 | -0.20660800 | H     | -0.47072900 | 0.94706100  | -2.30443400 |
| C | -3.98879800 | -1.13459000 | -0.68439300 | C     | 1.40602100  | 1.02312300  | -3.29479400 |
| H | -4.96647100 | -0.86092600 | -0.28961100 | H     | 0.97521200  | 1.51318800  | -4.16234400 |
| C | -3.90545500 | -2.14391900 | -1.64020500 | C     | 4.67019000  | -0.10380500 | -2.02820700 |
| C | -2.63745100 | -2.48647900 | -2.07382800 | C     | 2.39143400  | -0.28414000 | -1.01601900 |
| H | -2.53013000 | -3.29730900 | -2.79221700 | C     | 2.74878900  | 0.77748200  | -3.22466100 |
| C | -1.47666200 | -1.83577700 | -1.62283300 | C     | 3.26957300  | 0.12614500  | -2.08612900 |
| C | -3.16585800 | 0.53846500  | 0.89124900  | C     | 2.15501700  | -3.12772800 | 0.82625300  |
| H | -2.44620900 | 1.34984100  | 0.95970700  | H     | 1.72351700  | -3.28606100 | -0.16139200 |
| H | -3.18908900 | 0.03601800  | 1.86504100  | H     | 1.51000300  | -3.54885200 | 1.59708200  |
| H | -4.15639900 | 0.97489300  | 0.73216000  | H     | 3.15486800  | -3.55970800 | 0.87131600  |
| C | -5.14051800 | -2.82910600 | -2.16268800 | C     | 2.72020600  | -1.39310500 | 2.46438000  |
| H | -4.88468600 | -3.71703900 | -2.74578100 | H     | 3.63418700  | -1.95395700 | 2.65845100  |
| H | -5.71653600 | -2.15885200 | -2.80923000 | H     | 1.92028600  | -1.72014400 | 3.13138800  |
| H | -5.79953100 | -3.13543100 | -1.34475900 | H     | 2.89677400  | -0.32543600 | 2.57977200  |
| C | -0.20479800 | -2.42227600 | -2.21225800 | C     | -0.61091500 | 1.73527900  | 0.11072300  |
| H | -0.38717000 | -3.46416100 | -2.48985300 | C     | -1.68443300 | 2.47024600  | -0.46622900 |
| H | 0.64484400  | -2.39759200 | -1.53416300 | C     | -1.79635300 | 3.85378000  | -0.27531900 |
| H | 0.11418300  | -1.89089100 | -3.11410500 | H     | -2.64521500 | 4.36838800  | -0.72340000 |
| B | -0.26083900 | 0.10074300  | -0.15504000 | C     | -0.87352700 | 4.59599600  | 0.44721900  |
| N | 1.90607100  | -1.63045800 | 1.42021000  | C     | 0.23672200  | 3.90969700  | 0.92025400  |
| H | 0.70034300  | -0.84238300 | 1.24865300  | H     | 1.02687000  | 4.46132600  | 1.42851300  |
| H | 4.02188800  | 0.22520900  | -3.74296300 | C     | 0.38849500  | 2.53463800  | 0.73314500  |
| H | 5.61163900  | -0.64054800 | -2.24762500 | C     | -2.77538300 | 1.89833700  | -1.35656300 |
| C | -0.46535400 | 0.48128700  | 2.75535900  | H     | -2.46632600 | 1.02927800  | -1.93505000 |
| C | -1.14606900 | 0.26424000  | 3.95279600  | H     | -3.10174300 | 2.67377200  | -2.05538600 |
| C | -1.80509000 | -0.93876100 | 4.17872400  | H     | -3.65395400 | 1.58926500  | -0.78205400 |
| C | -1.80364200 | -1.91539400 | 3.18183400  | C     | -1.05674000 | 6.07147600  | 0.68893700  |

|   |             |             |             |        |             |             |             |
|---|-------------|-------------|-------------|--------|-------------|-------------|-------------|
| H | -1.59962000 | 6.25388800  | 1.62279100  | N11_TS |             |             |             |
| H | -1.62867100 | 6.53676000  | -0.11820700 | B      | 0.04477700  | 0.06015000  | 0.41994700  |
| H | -0.09380300 | 6.58391700  | 0.76450900  | N      | -2.24743600 | -2.06080200 | 0.46754100  |
| C | 1.74328700  | 1.99813800  | 1.15186200  | C      | -1.30594000 | -1.95212200 | 1.59910400  |
| H | 2.46924600  | 2.13778500  | 0.34254500  | H      | -0.47452300 | -2.62870200 | 1.36855600  |
| H | 1.72439000  | 0.93732900  | 1.38459000  | C      | -0.79865300 | -0.50249100 | 1.68668100  |
| H | 2.11710300  | 2.53164400  | 2.03211900  | H      | -1.71989700 | 0.09302500  | 1.70549000  |
| C | -1.64685700 | -0.83525000 | -0.57999600 | C      | -0.20839200 | -0.37403500 | 3.11595000  |
| C | -2.92460700 | -0.73033700 | 0.05000300  | H      | 0.87860100  | -0.27261700 | 3.12065800  |
| C | -4.03552500 | -1.41656500 | -0.43383300 | H      | -0.60996100 | 0.51794100  | 3.60477200  |
| H | -4.99356000 | -1.27969000 | 0.06615000  | C      | -0.64551500 | -1.66341300 | 3.86213200  |
| C | -3.96185600 | -2.27640300 | -1.52635000 | H      | 0.18922800  | -2.37057800 | 3.88702800  |
| C | -2.70691100 | -2.47365700 | -2.07613900 | H      | -0.94501000 | -1.47408700 | 4.89553300  |
| H | -2.59588300 | -3.19011100 | -2.88887100 | C      | -1.78613300 | -2.25758100 | 3.02157200  |
| C | -1.56381300 | -1.80013800 | -1.61552900 | H      | -2.72043900 | -1.71954700 | 3.22167100  |
| C | -3.18104900 | 0.08827200  | 1.30183500  | H      | -1.95646200 | -3.32130600 | 3.21347700  |
| H | -2.57289600 | 0.98930500  | 1.36646300  | C      | -2.32951400 | -3.40867000 | -0.12048700 |
| H | -2.97038000 | -0.50977400 | 2.19654400  | H      | -2.83884600 | -4.08436500 | 0.58634000  |
| H | -4.23389000 | 0.38253400  | 1.34603400  | H      | -1.31214600 | -3.78389200 | -0.25880400 |
| C | -5.18625000 | -2.97085500 | -2.06283000 | C      | -3.07073000 | -3.37465800 | -1.45467800 |
| H | -4.91500000 | -3.81286000 | -2.70476200 | H      | -3.12155400 | -4.38975700 | -1.86032000 |
| H | -5.79940900 | -2.28497400 | -2.65708200 | H      | -2.49004600 | -2.76815500 | -2.16183300 |
| H | -5.81569300 | -3.34865900 | -1.25182800 | C      | -4.46780700 | -2.77936200 | -1.28601100 |
| C | -0.28130400 | -2.26671300 | -2.28461000 | H      | -4.96821900 | -2.69302900 | -2.25488200 |
| H | -0.41917000 | -3.28762300 | -2.65226200 | H      | -5.07746800 | -3.45099500 | -0.66672700 |
| H | 0.56900200  | -2.26656800 | -1.60195000 | C      | -4.36819700 | -1.41671600 | -0.60422800 |
| H | 0.01410900  | -1.64481000 | -3.13465700 | H      | -3.84604200 | -0.70841200 | -1.25738400 |
| B | -0.38133800 | 0.06593200  | 0.03938800  | H      | -5.36153500 | -1.00413400 | -0.40321700 |
| N | 2.27435600  | -1.65844200 | 1.06408600  | C      | -3.60174800 | -1.52913100 | 0.70942500  |
| H | 1.31405200  | -1.25728300 | 1.00270100  | H      | -3.52145400 | -0.55286100 | 1.18815100  |
| H | 3.42777200  | 1.07181300  | -4.01923400 | H      | -4.13791600 | -2.20401800 | 1.39627600  |
| H | 5.27456200  | 0.25373100  | -2.85709800 | C      | -0.35640700 | 1.63122600  | 0.24558500  |
| C | -0.22070800 | 0.20352500  | 2.79291700  | F      | 1.75339900  | 2.50178700  | 0.91792700  |
| C | -0.35782300 | -0.34414900 | 4.06844100  | C      | 0.48273900  | 2.70259800  | 0.54711100  |
| C | -0.59212800 | -1.70663400 | 4.23238000  | F      | 0.93533900  | 5.00870900  | 0.79524600  |
| C | -0.70764700 | -2.50546500 | 3.09603800  | C      | 0.07749400  | 4.03265200  | 0.50371300  |
| C | -0.59012200 | -1.93519200 | 1.82864200  | F      | -1.63164800 | 5.61198700  | 0.11727700  |
| C | -0.32201000 | -0.56395200 | 1.61614200  | C      | -1.23035100 | 4.34516600  | 0.16792400  |
| H | -0.08485400 | 1.27754800  | 2.71478600  | F      | -3.38529200 | 3.58684400  | -0.42141100 |
| H | -0.29627800 | 0.30376500  | 4.93814000  | C      | -2.11748900 | 3.31582600  | -0.10977700 |
| H | -0.70728900 | -2.13424300 | 5.22359700  | F      | -2.59109700 | 1.05161600  | -0.29538700 |
| H | -0.92616200 | -3.56586600 | 3.19301800  | C      | -1.66510800 | 2.00686100  | -0.04395600 |
| H | -0.75199400 | -2.57265100 | 0.96005000  | C      | 1.63664800  | -0.24852700 | 0.30189700  |
|   |             |             |             | F      | 1.85717500  | 1.33308500  | -1.44732300 |

|       |             |             |             |   |             |             |             |
|-------|-------------|-------------|-------------|---|-------------|-------------|-------------|
| C     | 2.41546400  | 0.41096700  | -0.65278500 | C | 5.24932700  | -1.22001100 | 0.15506700  |
| F     | 4.44734700  | 0.83572300  | -1.78439500 | H | 6.01162000  | -0.95950400 | 0.89335200  |
| C     | 3.76076800  | 0.15766500  | -0.86573300 | H | 5.77069000  | -1.63245800 | -0.71874900 |
| F     | 5.68598100  | -1.08607300 | -0.30381700 | C | 4.45681500  | 0.02276300  | -0.24686600 |
| C     | 4.39551900  | -0.82449500 | -0.11664600 | H | 4.04318700  | 0.49369900  | 0.64755600  |
| F     | 4.24416600  | -2.50532900 | 1.52659700  | H | 5.10009800  | 0.76447800  | -0.72929000 |
| C     | 3.66300200  | -1.53687000 | 0.81756600  | C | 3.35165200  | -0.33273400 | -1.23591600 |
| F     | 1.66735800  | -2.04582300 | 1.86520200  | H | 2.72092400  | 0.52384400  | -1.48877700 |
| C     | 2.31457600  | -1.24468700 | 0.99490500  | H | 3.79355700  | -0.73330700 | -2.15159100 |
| H     | -1.40049900 | -1.19532100 | -0.42659900 | C | 0.47317700  | 1.03112800  | 0.15005600  |
| C     | 0.74405700  | -2.33338600 | -2.77207800 | F | -0.74037700 | 2.09522100  | -1.57802000 |
| C     | 0.30512900  | -2.01629600 | -1.49874100 | C | 0.25200800  | 2.13862100  | -0.67870600 |
| C     | -0.47809700 | -0.86633800 | -1.22940600 | F | 0.70382100  | 4.31963900  | -1.47359200 |
| C     | -0.81944400 | -0.06916400 | -2.33798400 | C | 0.98977200  | 3.31105600  | -0.65213000 |
| C     | -0.37568300 | -0.37040400 | -3.62271400 | F | 2.78505200  | 4.53813600  | 0.27667900  |
| C     | 0.40742700  | -1.49801300 | -3.84132100 | C | 2.05005700  | 3.42968800  | 0.23994200  |
| H     | 1.35303000  | -3.21588700 | -2.93963900 | F | 3.38779200  | 2.41022400  | 1.89405900  |
| H     | 0.60210700  | -2.65433900 | -0.66795500 | C | 2.33418800  | 2.36382400  | 1.07114600  |
| H     | -1.44072100 | 0.80798500  | -2.19961900 | F | 2.03196100  | 0.18482800  | 1.76056800  |
| H     | -0.64009900 | 0.27658000  | -4.45264400 | C | 1.56134300  | 1.20638000  | 0.99472100  |
| H     | 0.75778100  | -1.73102500 | -4.84222700 | C | -2.07429500 | 0.01951700  | -0.06527000 |
| N11_P |             |             |             | F | -1.89914300 | 2.23939500  | 0.80523900  |
| B     | -0.45512100 | -0.34849700 | -0.09905800 | C | -2.65169300 | 1.20901000  | 0.38009900  |
| N     | 2.44262200  | -1.40578300 | -0.71182600 | F | -4.48723600 | 2.61326000  | 0.87743100  |
| C     | 1.30672300  | -1.77461100 | -1.65124600 | C | -4.02207100 | 1.43581000  | 0.45511800  |
| H     | 0.99198700  | -2.75135100 | -1.28124400 | F | -6.22262900 | 0.62679800  | 0.17409400  |
| C     | 0.09385500  | -0.83596000 | -1.61306500 | C | -4.90682600 | 0.43086300  | 0.10463200  |
| H     | 0.41123600  | 0.08444300  | -2.12910400 | F | -5.21984600 | -1.79138900 | -0.61297900 |
| C     | -0.74793300 | -1.57057000 | -2.67512900 | C | -4.39362500 | -0.79086400 | -0.29973500 |
| H     | -1.16702900 | -2.49237300 | -2.26816400 | F | -2.62201100 | -2.20877300 | -0.69215900 |
| H     | -1.58491100 | -0.96011300 | -3.02200700 | C | -3.01775400 | -0.96698800 | -0.35672000 |
| C     | 0.25703500  | -1.91059100 | -3.80440400 | H | 1.98176500  | -1.05308000 | 0.14196700  |
| H     | 0.03217400  | -2.87178600 | -4.27204400 | C | -0.20715400 | -3.72254800 | 2.01289400  |
| H     | 0.23027000  | -1.15543100 | -4.59350800 | C | -0.27719300 | -2.82907100 | 0.94085000  |
| C     | 1.66127100  | -1.91726400 | -3.13414000 | C | -0.28554100 | -1.43652300 | 1.11977500  |
| H     | 2.23309800  | -1.05427800 | -3.48402600 | C | -0.29749300 | -0.99392700 | 2.45516300  |
| H     | 2.23947400  | -2.81830600 | -3.35976700 | C | -0.23728800 | -1.86739400 | 3.53352800  |
| C     | 3.21033700  | -2.62408300 | -0.28513100 | C | -0.17178900 | -3.24358100 | 3.31620000  |
| H     | 3.62982100  | -3.06118800 | -1.19765400 | H | -0.20677100 | -4.79264400 | 1.82450800  |
| H     | 2.47455300  | -3.31023200 | 0.14144500  | H | -0.39493800 | -3.24359900 | -0.05672600 |
| C     | 4.29371200  | -2.26748900 | 0.72248500  | H | -0.36499600 | 0.07538900  | 2.65090200  |
| H     | 4.82114900  | -3.18639100 | 0.99306500  | H | -0.24651000 | -1.47743300 | 4.54713900  |
| H     | 3.81813000  | -1.88692800 | 1.63482000  | H | -0.12147200 | -3.93123900 | 4.15476500  |

|        |             |             |             |       |             |             |             |
|--------|-------------|-------------|-------------|-------|-------------|-------------|-------------|
| N12_TS |             |             |             | C     | 1.43928300  | 1.76356600  | -0.90426800 |
| N      | 2.60890100  | -1.37364900 | 0.34345900  | F     | 2.19410800  | 0.82008200  | -1.51122400 |
| H      | 1.34827700  | -1.16194800 | -0.51118300 | C     | -1.74838800 | -0.24450100 | 0.25788400  |
| B      | -0.12020700 | -0.11422100 | 0.28900000  | C     | -2.49013300 | 0.36560700  | -0.75495500 |
| C      | 2.16150800  | -0.61466200 | 1.54553600  | F     | -1.87427400 | 1.11866900  | -1.68041100 |
| H      | 2.47620800  | 0.42280600  | 1.35735300  | C     | -3.86387000 | 0.23573700  | -0.90026900 |
| C      | 0.62393100  | -0.61551200 | 1.65191600  | F     | -4.50308100 | 0.84521900  | -1.89837200 |
| H      | 0.31362000  | -1.64083900 | 1.89732200  | C     | -4.57193900 | -0.54585700 | 0.00020400  |
| C      | 3.91428600  | -0.91231900 | -0.16733400 | F     | -5.88920500 | -0.68803000 | -0.11942200 |
| H      | 4.70418900  | -1.18970200 | 0.55103600  | C     | -3.88439800 | -1.18574900 | 1.01912500  |
| H      | 3.89280800  | 0.17468900  | -0.23954000 | F     | -4.54412100 | -1.95416100 | 1.88638300  |
| C      | 4.21533000  | -1.53976800 | -1.52360700 | C     | -2.50698600 | -1.02993600 | 1.12279200  |
| H      | 3.44055200  | -1.22447100 | -2.23279400 | F     | -1.92947200 | -1.72685000 | 2.11957300  |
| H      | 5.17284900  | -1.15926600 | -1.89194500 | C     | 0.14185800  | -0.90462400 | -2.42097300 |
| C      | 4.23520500  | -3.06391700 | -1.41343800 | C     | 0.24069500  | -1.33865200 | -1.08393800 |
| H      | 5.07717200  | -3.36933400 | -0.77757700 | C     | -0.34171200 | -2.59242800 | -0.77372600 |
| H      | 4.38979800  | -3.52350200 | -2.39392800 | C     | -0.99720300 | -3.35344900 | -1.72576100 |
| C      | 2.92541400  | -3.55065700 | -0.79369200 | C     | -1.08839700 | -2.88230200 | -3.03819300 |
| H      | 2.09991700  | -3.35967500 | -1.48820000 | C     | -0.51957000 | -1.66025600 | -3.38320500 |
| H      | 2.95479300  | -4.62960100 | -0.61172500 | H     | 0.57807000  | 0.04264000  | -2.71289200 |
| C      | 2.65564400  | -2.83740100 | 0.53058300  | H     | -0.32848600 | -2.94093700 | 0.25637200  |
| H      | 1.70889400  | -3.16600800 | 0.96714400  | H     | -1.44996200 | -4.30120800 | -1.45347200 |
| H      | 3.45233900  | -3.09214600 | 1.24611500  | H     | -1.60892500 | -3.46906300 | -3.78908500 |
| C      | 2.83090900  | -1.07632600 | 2.84648600  | H     | -0.59588400 | -1.29348100 | -4.40143100 |
| H      | 2.52999800  | -2.10910900 | 3.06445900  |       |             |             |             |
| H      | 3.92245700  | -1.07226800 | 2.73717400  | N12_P |             |             |             |
| C      | 2.40530400  | -0.19281600 | 4.01973600  | N     | 2.75183800  | -1.03448100 | 0.56078200  |
| H      | 2.88287800  | -0.54044000 | 4.94144100  | H     | 2.18996300  | -0.86106600 | -0.28905800 |
| H      | 2.75447800  | 0.83447200  | 3.84831800  | B     | -0.22994300 | -0.18203200 | 0.08990500  |
| C      | 0.88389000  | -0.19183100 | 4.15906600  | C     | 1.98799400  | -0.32669900 | 1.67582200  |
| H      | 0.57763800  | 0.45939500  | 4.98440100  | H     | 2.20285800  | 0.73616100  | 1.49810900  |
| H      | 0.54038900  | -1.20518500 | 4.40797000  | C     | 0.46941000  | -0.53906900 | 1.56403000  |
| C      | 0.22288100  | 0.25985800  | 2.85712200  | H     | 0.27441400  | -1.59106000 | 1.81383000  |
| H      | 0.51974600  | 1.29946700  | 2.65924700  | C     | 4.11609500  | -0.46082600 | 0.31601000  |
| H      | -0.86475200 | 0.26472700  | 2.96618600  | H     | 4.73627500  | -0.73440900 | 1.17439300  |
| C      | 0.36171500  | 1.40101900  | -0.10653300 | H     | 4.01044600  | 0.62269300  | 0.27778300  |
| C      | -0.30932400 | 2.49322200  | 0.45032300  | C     | 4.68808900  | -1.01926600 | -0.98038400 |
| F      | -1.35853700 | 2.29990000  | 1.26233100  | H     | 4.04677800  | -0.69989000 | -1.81173300 |
| C      | 0.04096500  | 3.81829200  | 0.23068700  | H     | 5.67397200  | -0.57522900 | -1.14341800 |
| F      | -0.64991800 | 4.80486900  | 0.79791100  | C     | 4.76447500  | -2.54558000 | -0.93086600 |
| C      | 1.12365900  | 4.11513600  | -0.58479600 | H     | 5.49333700  | -2.85104500 | -0.16859100 |
| F      | 1.47949100  | 5.37737500  | -0.80346400 | H     | 5.11627300  | -2.93859700 | -1.88808500 |
| C      | 1.83159600  | 3.07287500  | -1.15756700 | C     | 3.38819400  | -3.12005500 | -0.59586600 |
| F      | 2.88131400  | 3.32321000  | -1.94055200 | H     | 2.68490800  | -2.90740900 | -1.40988400 |

|   |             |             |             |        |             |             |             |
|---|-------------|-------------|-------------|--------|-------------|-------------|-------------|
| H | 3.42591600  | -4.20737300 | -0.48379400 | H      | 0.77211000  | 0.15817100  | -2.65774900 |
| C | 2.84165300  | -2.52445600 | 0.69528700  | H      | -0.41820600 | -2.91500000 | 0.08687200  |
| H | 1.84046800  | -2.89329200 | 0.91931200  | H      | -0.03038600 | -4.61480500 | -1.64210400 |
| H | 3.50330300  | -2.72969100 | 1.54166100  | H      | 0.78241700  | -3.94295100 | -3.89844300 |
| C | 2.54686400  | -0.72765600 | 3.04251000  | H      | 1.17334100  | -1.53698800 | -4.38090700 |
| H | 2.33697300  | -1.78992100 | 3.21939000  |        |             |             |             |
| H | 3.63467400  | -0.59233300 | 3.08539800  | N13_TS |             |             |             |
| C | 1.87241100  | 0.08729700  | 4.14909200  | N      | 2.33646000  | -0.77581800 | -0.68886700 |
| H | 2.26304000  | -0.22742800 | 5.12163200  | H      | 0.86633600  | -0.76347500 | -1.14933200 |
| H | 2.13380500  | 1.14688400  | 4.02756700  | B      | -0.42921500 | -0.14338400 | 0.14757400  |
| C | 0.35480600  | -0.07076000 | 4.08205800  | C      | 2.12494500  | -0.28608700 | 0.71168600  |
| H | -0.12132800 | 0.54847700  | 4.84919500  | H      | 2.13974500  | 0.80586400  | 0.61801300  |
| H | 0.08349400  | -1.11290100 | 4.29794600  | C      | 0.71729700  | -0.68906400 | 1.16400200  |
| C | -0.15847000 | 0.30576000  | 2.69367900  | H      | 0.54144800  | -0.24792800 | 2.15273400  |
| H | 0.06848000  | 1.36672200  | 2.51205700  | H      | 0.65929400  | -1.76989300 | 1.32119900  |
| H | -1.24539400 | 0.21497100  | 2.65090300  | C      | 2.71760400  | -2.20041900 | -0.77351100 |
| C | 0.10213500  | 1.42143100  | -0.20631900 | H      | 2.01481500  | -2.78490300 | -0.17340800 |
| C | -0.75504700 | 2.45230500  | 0.19252800  | H      | 3.71448800  | -2.33732300 | -0.32854600 |
| F | -1.91385300 | 2.17857400  | 0.80760100  | C      | 2.72625600  | -2.68019300 | -2.22391700 |
| C | -0.48846300 | 3.80484600  | 0.02127200  | H      | 1.71330500  | -2.61650700 | -2.63854500 |
| F | -1.36216100 | 4.72457500  | 0.42737800  | H      | 3.01964000  | -3.73452300 | -2.24192100 |
| C | 0.70457700  | 4.20535500  | -0.56324700 | C      | 3.67896100  | -1.83240100 | -3.06588400 |
| F | 0.98191600  | 5.49673500  | -0.72445300 | H      | 4.70971500  | -1.99118200 | -2.72163100 |
| C | 1.60870200  | 3.23369200  | -0.95271200 | H      | 3.63918300  | -2.13629800 | -4.11594500 |
| F | 2.78218900  | 3.57576500  | -1.49037000 | C      | 3.31981400  | -0.35526700 | -2.91336100 |
| C | 1.28471300  | 1.89625800  | -0.75906400 | H      | 4.03121700  | 0.28074200  | -3.44891000 |
| F | 2.26863600  | 1.03060500  | -1.13926800 | H      | 2.32579800  | -0.16512200 | -3.33531000 |
| C | -1.86672000 | -0.44492800 | 0.10940500  | C      | 3.30911500  | 0.03862500  | -1.44124000 |
| C | -2.65194700 | 0.07566600  | -0.91987800 | H      | 4.31247200  | -0.10724800 | -1.00829800 |
| F | -2.09237800 | 0.87960600  | -1.83992900 | H      | 3.03978200  | 1.08989600  | -1.32250000 |
| C | -4.00503600 | -0.17888800 | -1.07863400 | C      | 3.25977100  | -0.65542400 | 1.65328600  |
| F | -4.69124800 | 0.36422200  | -2.08533200 | C      | 4.35924700  | 0.20133500  | 1.76198600  |
| C | -4.64730200 | -1.02226900 | -0.18251000 | H      | 4.36418600  | 1.13170100  | 1.19866400  |
| F | -5.94642900 | -1.28654400 | -0.31480000 | C      | 5.43407900  | -0.10833900 | 2.59007600  |
| C | -3.91363900 | -1.59002700 | 0.84399400  | H      | 6.27452100  | 0.57445100  | 2.66315300  |
| F | -4.50631900 | -2.41741500 | 1.70828700  | C      | 5.42256900  | -1.28669900 | 3.33008300  |
| C | -2.55695400 | -1.30111300 | 0.95959700  | H      | 6.25614900  | -1.53154900 | 3.98032200  |
| F | -1.92877400 | -1.94218200 | 1.97184000  | C      | 4.32960400  | -2.14472400 | 3.24002700  |
| C | 0.63262500  | -0.88738100 | -2.40118300 | H      | 4.30834800  | -3.05975500 | 3.82337200  |
| C | 0.20706100  | -1.23040000 | -1.10913300 | C      | 3.25702000  | -1.83031300 | 2.41034100  |
| C | -0.02446600 | -2.60352300 | -0.88131000 | H      | 2.40610900  | -2.50336500 | 2.36282800  |
| C | 0.17610000  | -3.57065900 | -1.85994300 | C      | -1.97371700 | -0.47992100 | 0.52821600  |
| C | 0.62695400  | -3.19570500 | -3.12652700 | C      | -3.02454200 | 0.13253300  | -0.15340000 |
| C | 0.85030300  | -1.84945100 | -3.39202300 | F      | -2.76717500 | 1.03027400  | -1.11810600 |

|       |             |             |             |   |             |             |             |
|-------|-------------|-------------|-------------|---|-------------|-------------|-------------|
| C     | -4.36450800 | -0.13883100 | 0.08655900  | H | -2.17820100 | -2.08031800 | 2.76431100  |
| F     | -5.31970500 | 0.48032600  | -0.60693500 | H | -3.29683400 | -3.36496400 | 2.32147600  |
| C     | -4.70483500 | -1.06926800 | 1.05703300  | C | -4.24965700 | -1.44345900 | 2.70995500  |
| F     | -5.98220100 | -1.34833100 | 1.30371500  | H | -5.18051700 | -1.73851900 | 2.20846000  |
| C     | -3.69708800 | -1.71340400 | 1.75858300  | H | -4.39466400 | -1.60489000 | 3.78115700  |
| F     | -4.00838500 | -2.61772100 | 2.68727600  | C | -3.96550600 | 0.03246000  | 2.42984200  |
| C     | -2.36837700 | -1.41224800 | 1.48281300  | H | -4.81077300 | 0.66307400  | 2.71890100  |
| F     | -1.45771100 | -2.10322400 | 2.18955200  | H | -3.09706400 | 0.36585000  | 3.01182100  |
| C     | -0.22740700 | 1.46834300  | -0.05233500 | C | -3.67723800 | 0.26079000  | 0.95212800  |
| C     | 0.41759900  | 2.16067700  | -1.06854500 | H | -4.52484000 | -0.02487900 | 0.32165600  |
| F     | 0.94857300  | 1.50667700  | -2.12689300 | H | -3.41339100 | 1.29964000  | 0.75073200  |
| C     | 0.59269400  | 3.53984500  | -1.08768400 | C | -2.99312900 | -0.60595900 | -1.93663400 |
| F     | 1.22420600  | 4.12536300  | -2.10535200 | C | -3.93443500 | 0.32843400  | -2.37820400 |
| C     | 0.11466800  | 4.30107800  | -0.03451700 | H | -3.92464500 | 1.33339500  | -1.96179500 |
| F     | 0.27322200  | 5.62124900  | -0.02855100 | C | -4.86678200 | -0.00285300 | -3.35730300 |
| C     | -0.51929500 | 3.66231100  | 1.02213700  | H | -5.58382200 | 0.73863100  | -3.69424600 |
| F     | -0.96785100 | 4.37472500  | 2.05296000  | C | -4.86747100 | -1.27951500 | -3.91038300 |
| C     | -0.66710300 | 2.28217900  | 0.99485300  | H | -5.58926700 | -1.54061100 | -4.67748000 |
| F     | -1.25490100 | 1.73070400  | 2.06716800  | C | -3.92764700 | -2.21619600 | -3.48693400 |
| C     | -1.30801600 | -3.28076000 | -2.00943400 | H | -3.91301900 | -3.20868200 | -3.92542800 |
| C     | -0.55072100 | -2.48705600 | -1.16533300 | C | -2.99413700 | -1.88033000 | -2.51196200 |
| C     | -0.31266300 | -1.11676300 | -1.43379300 | H | -2.25109900 | -2.61142100 | -2.20825000 |
| C     | -0.87100400 | -0.59489000 | -2.61861700 | C | 2.08450600  | -0.65184900 | -0.35400100 |
| C     | -1.63901200 | -1.38368300 | -3.46839900 | C | 3.15780500  | -0.10665000 | 0.34978900  |
| C     | -1.85745300 | -2.72447300 | -3.16676600 | F | 2.92830000  | 0.83307200  | 1.28347800  |
| H     | -1.48702200 | -4.32316200 | -1.76748100 | C | 4.48146700  | -0.46694000 | 0.15334200  |
| H     | -0.17787900 | -2.91841500 | -0.24015900 | F | 5.46014400  | 0.10090800  | 0.86035200  |
| H     | -0.71510000 | 0.44468300  | -2.87382900 | C | 4.78640000  | -1.44065100 | -0.78832500 |
| H     | -2.07045300 | -0.95111200 | -4.36496300 | F | 6.05094200  | -1.80893500 | -0.99195300 |
| H     | -2.46090800 | -3.33848100 | -3.82847400 | C | 3.75760500  | -2.02700000 | -1.50489900 |
| N13_P |             |             |             | F | 4.02836000  | -2.97258300 | -2.40801700 |
| N     | -2.51646000 | -0.58095600 | 0.51960200  | C | 2.44426100  | -1.62828900 | -1.27274100 |
| H     | -1.72689200 | -0.36895900 | 1.15218500  | F | 1.51267400  | -2.27877800 | -2.00076700 |
| B     | 0.55336100  | -0.20205800 | 0.05864600  | C | 0.44661300  | 1.45743500  | 0.07114400  |
| C     | -1.98767400 | -0.21037800 | -0.87354300 | C | -0.43539700 | 2.20851800  | 0.83956000  |
| H     | -1.95592400 | 0.88427600  | -0.83504800 | F | -1.30689300 | 1.59543600  | 1.69168500  |
| C     | -0.56409700 | -0.73127100 | -1.05110800 | C | -0.56676600 | 3.59116700  | 0.79736000  |
| H     | -0.25841000 | -0.39977500 | -2.05117700 | F | -1.45816400 | 4.21272900  | 1.57329000  |
| H     | -0.57347600 | -1.82386200 | -1.11196300 | C | 0.21999900  | 4.31365100  | -0.08296600 |
| C     | -2.82665000 | -2.03328600 | 0.71890400  | F | 0.11436200  | 5.63789100  | -0.15887200 |
| H     | -1.96864700 | -2.60229300 | 0.36028900  | C | 1.10007100  | 3.62519200  | -0.90455100 |
| H     | -3.69773500 | -2.25973100 | 0.09757300  | F | 1.84301500  | 4.29786200  | -1.78153800 |
| C     | -3.09152800 | -2.29805000 | 2.19599300  | C | 1.18354800  | 2.24018100  | -0.82329400 |
|       |             |             |             | F | 2.02092500  | 1.67225000  | -1.70093200 |

|        |             |             |             |       |             |             |             |
|--------|-------------|-------------|-------------|-------|-------------|-------------|-------------|
| C      | 0.31547600  | -3.12549800 | 2.66933100  | H     | -4.31066800 | -3.05863500 | -3.82247100 |
| C      | 0.35830500  | -2.36503300 | 1.50583100  | C     | -3.25845400 | -1.82957200 | -2.40977200 |
| C      | 0.37534900  | -0.95508700 | 1.51605400  | H     | -2.40802500 | -2.50322300 | -2.36206000 |
| C      | 0.38582900  | -0.35332300 | 2.78323700  | C     | 1.97334100  | -0.48016500 | -0.52855300 |
| C      | 0.33325400  | -1.10291900 | 3.96179200  | C     | 3.02425700  | 0.13202100  | 0.15315500  |
| C      | 0.29010500  | -2.49187100 | 3.91190800  | F     | 2.76702100  | 1.02965600  | 1.11798700  |
| H      | 0.31544500  | -4.21029900 | 2.61016400  | C     | 4.36417700  | -0.13958000 | -0.08680800 |
| H      | 0.42465700  | -2.88244800 | 0.54790800  | F     | 5.31948400  | 0.47939000  | 0.60669900  |
| H      | 0.46276500  | 0.72652000  | 2.86350300  | C     | 4.70433700  | -1.07011700 | -1.05724000 |
| H      | 0.34761600  | -0.59442600 | 4.92161000  | F     | 5.98165100  | -1.34955500 | -1.30377700 |
| H      | 0.25930600  | -3.07552000 | 4.82674900  | C     | 3.69648000  | -1.71398900 | -1.75888400 |
| N14_TS |             |             |             | F     | 4.00762200  | -2.61840300 | -2.68753200 |
| B      | 0.42888900  | -0.14344900 | -0.14781800 | C     | 2.36782800  | -1.41251000 | -1.48319500 |
| N      | -2.33661500 | -0.77573000 | 0.68887700  | F     | 1.45701200  | -2.10326200 | -2.18997200 |
| H      | -0.86675100 | -0.76360000 | 1.14897600  | C     | 0.22742400  | 1.46832800  | 0.05217300  |
| C      | -2.12528000 | -0.28565700 | -0.71157500 | C     | -0.41679000 | 2.16083500  | 1.06876300  |
| H      | -2.13986900 | 0.80626600  | -0.61754000 | F     | -0.94809200 | 1.50691300  | 2.12702700  |
| C      | -0.71780000 | -0.68871200 | -1.16430400 | C     | -0.59081800 | 3.54013300  | 1.08838900  |
| H      | -0.54213300 | -0.24728900 | -2.15293300 | F     | -1.22143400 | 4.12583500  | 2.10651100  |
| H      | -0.65998000 | -1.76951000 | -1.32183500 | C     | -0.11267600 | 4.30130700  | 0.03523900  |
| C      | -2.71777900 | -2.20034200 | 0.77339800  | F     | -0.27026900 | 5.62159400  | 0.02970500  |
| H      | -2.01518700 | -2.78477100 | 0.17302000  | C     | 0.52035100  | 3.66236700  | -1.02187200 |
| H      | -3.71479400 | -2.33709100 | 0.32868800  | F     | 0.96894200  | 4.37472600  | -2.05270900 |
| C      | -2.72616500 | -2.68027100 | 2.22377000  | C     | 0.66722100  | 2.28213000  | -0.99500300 |
| H      | -3.01922700 | -3.73468800 | 2.24176100  | F     | 1.25432800  | 1.73054700  | -2.06765100 |
| H      | -1.71321200 | -2.61628000 | 2.63834400  | C     | 0.87051400  | -0.59564600 | 2.61844800  |
| C      | -3.67900100 | -1.83263400 | 3.06573700  | C     | 0.31257700  | -1.11707100 | 1.43325200  |
| H      | -4.70962600 | -1.99099700 | 2.72089000  | C     | 0.55065100  | -2.48728300 | 1.16442700  |
| H      | -3.63982300 | -2.13689400 | 4.11571100  | C     | 1.30763200  | -3.28131100 | 2.00850400  |
| C      | -3.31938700 | -0.35556300 | 2.91367800  | C     | 1.85666900  | -2.72547400 | 3.16624300  |
| H      | -4.03030500 | 0.28056800  | 3.44972200  | C     | 1.63816200  | -1.38478400 | 3.46825100  |
| H      | -2.32512000 | -0.16595800 | 3.33528500  | H     | 0.71444000  | 0.44379400  | 2.87407200  |
| C      | -3.30897700 | 0.03872200  | 1.44166000  | H     | 0.17795500  | -2.91836100 | 0.23905500  |
| H      | -3.03942700 | 1.08995300  | 1.32311700  | H     | 1.48663600  | -4.32364500 | 1.76625700  |
| H      | -4.31243300 | -0.10686800 | 1.00887100  | H     | 2.45985400  | -3.33974100 | 3.82795500  |
| C      | -3.26037100 | -0.65447300 | -1.65303900 | H     | 2.06924700  | -0.95254800 | 4.36515100  |
| C      | -4.35923200 | 0.20303700  | -1.76195000 | N14_P |             |             |             |
| H      | -4.36356600 | 1.13348000  | -1.19875000 | B     | 0.55345200  | -0.20204700 | 0.05853600  |
| C      | -5.43425100 | -0.10604400 | -2.59002300 | N     | -2.51626200 | -0.58131500 | 0.51950600  |
| H      | -6.27419400 | 0.57733900  | -2.66329000 | H     | -1.72670900 | -0.36937400 | 1.15212200  |
| C      | -5.42356600 | -1.28458900 | -3.32974100 | C     | -1.98753500 | -0.21037100 | -0.87358400 |
| H      | -6.25728400 | -1.52898000 | -3.97997500 | H     | -1.95582100 | 0.88427800  | -0.83481000 |
| C      | -4.33124800 | -2.14341300 | -3.23940200 | C     | -0.56394000 | -0.73112300 | -1.05138900 |

|   |             |             |             |        |             |             |             |
|---|-------------|-------------|-------------|--------|-------------|-------------|-------------|
| H | -0.25834200 | -0.39930100 | -2.05137300 | C      | 0.21941800  | 4.31363200  | -0.08229500 |
| H | -0.57319900 | -1.82369300 | -1.11257100 | F      | 0.11356200  | 5.63786800  | -0.15798200 |
| C | -2.82631600 | -2.03371100 | 0.71860500  | C      | 1.09951000  | 3.62541100  | -0.90407900 |
| H | -1.96825400 | -2.60261000 | 0.35996600  | F      | 1.84230800  | 4.29828200  | -1.78102500 |
| H | -3.69735500 | -2.26016100 | 0.09721500  | C      | 1.18313800  | 2.24040400  | -0.82304300 |
| C | -3.09118900 | -2.29863500 | 2.19566200  | F      | 2.02048200  | 1.67266300  | -1.70083400 |
| H | -3.29628200 | -3.36559700 | 2.32107700  | C      | 0.38568500  | -0.35400500 | 2.78314200  |
| H | -2.17790600 | -2.08076300 | 2.76401800  | C      | 0.37542100  | -0.95546300 | 1.51579400  |
| C | -4.24949800 | -1.44430700 | 2.70966000  | C      | 0.35872800  | -2.36540600 | 1.50523600  |
| H | -5.18028300 | -1.73949000 | 2.20809800  | C      | 0.31593300  | -3.12615900 | 2.66855000  |
| H | -4.39451800 | -1.60589500 | 3.78083800  | C      | 0.29029100  | -2.49285300 | 3.91126300  |
| C | -3.96557700 | 0.03169200  | 2.42974300  | C      | 0.33314700  | -1.10389200 | 3.96149700  |
| H | -4.81100700 | 0.66212800  | 2.71871800  | H      | 0.46242100  | 0.72582300  | 2.86365600  |
| H | -3.09732200 | 0.36518000  | 3.01193500  | H      | 0.42534800  | -2.88255200 | 0.54718900  |
| C | -3.67715200 | 0.26024700  | 0.95211200  | H      | 0.31619300  | -4.21094400 | 2.60911900  |
| H | -3.41339700 | 1.29915900  | 0.75091000  | H      | 0.25954500  | -3.07671300 | 4.82597300  |
| H | -4.52466300 | -0.02541800 | 0.32151600  | H      | 0.34731500  | -0.59565900 | 4.92145500  |
| C | -2.99306400 | -0.60573200 | -1.93669000 |        |             |             |             |
| C | -3.93468000 | 0.32860800  | -2.37773000 | N15_TS |             |             |             |
| H | -3.92508000 | 1.33339600  | -1.96091100 | N      | -2.37029100 | -0.74533000 | 1.04311700  |
| C | -4.86713500 | -0.00253400 | -3.35676500 | B      | 0.36071900  | -0.15747700 | -0.04332100 |
| H | -5.58444400 | 0.73889300  | -3.69326100 | C      | -2.23996200 | -0.34804300 | -0.39558000 |
| C | -4.86761600 | -1.27898500 | -3.91034800 | H      | -2.24883300 | 0.74820700  | -0.37715300 |
| H | -5.58949500 | -1.53997500 | -4.67740200 | C      | -0.86327900 | -0.79890600 | -0.89570000 |
| C | -3.92745900 | -2.21558600 | -3.48746700 | H      | -0.75794500 | -0.48181800 | -1.94100200 |
| H | -3.91265100 | -3.20788800 | -3.92636700 | H      | -0.80992600 | -1.89074300 | -0.92234700 |
| C | -2.99384200 | -1.87986200 | -2.51253900 | C      | -2.65128000 | -2.18463100 | 1.25991000  |
| H | -2.25055600 | -2.61087700 | -2.20926600 | C      | -4.11930200 | -2.59774400 | 1.36977800  |
| C | 2.08469400  | -0.65158100 | -0.35405100 | H      | -4.59315900 | -2.19470800 | 2.26821800  |
| C | 3.15791900  | -0.10641100 | 0.34986600  | H      | -4.16536800 | -3.68786500 | 1.43758300  |
| F | 2.92831100  | 0.83310100  | 1.28374500  | C      | -2.98377200 | -0.03422000 | 3.33548500  |
| C | 4.48163000  | -0.46651000 | 0.15337400  | H      | -3.59174300 | 0.67836700  | 3.89775100  |
| F | 5.46021600  | 0.10133200  | 0.86050900  | H      | -1.93157100 | 0.15797000  | 3.56073000  |
| C | 4.78668400  | -1.44001600 | -0.78845800 | C      | -3.24464000 | 0.12884100  | 1.84402300  |
| F | 6.05126800  | -1.80810200 | -0.99219400 | C      | -3.42633200 | -0.78871500 | -1.23501600 |
| C | 3.75796200  | -2.02633600 | -1.50516800 | C      | -4.59258000 | -0.01605400 | -1.22352900 |
| F | 4.02886400  | -2.97169500 | -2.40848500 | H      | -4.60144000 | 0.92485900  | -0.67813900 |
| C | 2.44457700  | -1.62782500 | -1.27296200 | C      | -5.73483200 | -0.43206100 | -1.89955700 |
| F | 1.51307100  | -2.27824300 | -2.00114800 | H      | -6.63051300 | 0.18049400  | -1.87738700 |
| C | 0.44641600  | 1.45742900  | 0.07138800  | C      | -5.72357900 | -1.62891600 | -2.61173200 |
| C | -0.43560500 | 2.20828300  | 0.84001000  | H      | -6.61212100 | -1.95712600 | -3.14129800 |
| F | -1.30698100 | 1.59494200  | 1.69209200  | C      | -4.55959300 | -2.39111200 | -2.65731400 |
| C | -0.56716600 | 3.59091500  | 0.79799600  | H      | -4.53726800 | -3.31422700 | -3.22774800 |
| F | -1.45857100 | 4.21224900  | 1.57409500  | C      | -3.41843700 | -1.97146700 | -1.97805300 |



|       |             |             |             |   |             |             |             |
|-------|-------------|-------------|-------------|---|-------------|-------------|-------------|
| H     | -2.51480900 | -2.57100400 | -2.03265000 | B | 0.50861000  | -0.15219300 | 0.13597800  |
| C     | 1.86338600  | -0.62398500 | -0.45919500 | C | -2.14465400 | -0.26494000 | -0.53779300 |
| C     | 2.98239800  | 0.02059700  | 0.06818200  | H | -2.11936300 | 0.82657200  | -0.61110000 |
| F     | 2.82874400  | 1.05737600  | 0.90759500  | C | -0.73725400 | -0.82494400 | -0.73201800 |
| C     | 4.29131600  | -0.34953600 | -0.20808100 | H | -0.51766700 | -0.70997400 | -1.80042600 |
| F     | 5.31572100  | 0.30945400  | 0.33303000  | H | -0.75847600 | -1.90721900 | -0.57189700 |
| C     | 4.52951500  | -1.41868500 | -1.05878200 | C | -2.93044600 | -1.95053500 | 1.23563100  |
| F     | 5.77546400  | -1.79346500 | -1.33749800 | C | -4.40005300 | -2.32082400 | 1.09541600  |
| C     | 3.45247500  | -2.09671900 | -1.60706600 | H | -5.02040900 | -1.84705800 | 1.85978500  |
| F     | 3.66374200  | -3.12924100 | -2.42381700 | H | -4.47781000 | -3.40134900 | 1.23801000  |
| C     | 2.15833700  | -1.69296700 | -1.30085000 | C | -3.56883900 | 0.47631100  | 2.96346500  |
| F     | 1.18044700  | -2.42364000 | -1.86403000 | H | -4.23415100 | 1.26002800  | 3.33066300  |
| C     | 0.23295100  | 1.47372300  | -0.07655400 | H | -2.55464500 | 0.69697200  | 3.31513600  |
| C     | -0.38631500 | 2.31774300  | 0.83517200  | C | -3.60587900 | 0.45196600  | 1.44337200  |
| F     | -0.94172900 | 1.82190100  | 1.96464600  | C | -3.20774200 | -0.78297400 | -1.48532600 |
| C     | -0.50925100 | 3.69296700  | 0.67459700  | C | -4.33593000 | -0.00245000 | -1.75602900 |
| F     | -1.12032600 | 4.43073400  | 1.60176800  | H | -4.40624200 | 0.99979800  | -1.33938100 |
| C     | -0.00409900 | 4.29024400  | -0.46834400 | C | -5.36326200 | -0.48858900 | -2.55907800 |
| F     | -0.11508400 | 5.60267700  | -0.64993800 | H | -6.23202400 | 0.12965200  | -2.76073800 |
| C     | 0.60393600  | 3.49450200  | -1.42879300 | C | -5.26724600 | -1.76264500 | -3.11372400 |
| F     | 1.07839900  | 4.04727900  | -2.54285500 | H | -6.06565400 | -2.14446500 | -3.74154300 |
| C     | 0.69888600  | 2.12511100  | -1.22102900 | C | -4.13118500 | -2.53301200 | -2.88111800 |
| F     | 1.25797800  | 1.41846700  | -2.21380800 | H | -4.03794800 | -3.51534000 | -3.33261700 |
| H     | -4.70126000 | -2.28762900 | 0.49919000  | C | -3.10505000 | -2.04431600 | -2.07770800 |
| H     | -3.23369100 | -1.03804900 | 3.68943200  | H | -2.21375000 | -2.64391800 | -1.92159100 |
| H     | -2.11582400 | -2.48867100 | 2.16817000  | C | 1.94283000  | -0.86841900 | -0.25583700 |
| H     | -2.18958100 | -2.73124800 | 0.43360000  | C | 3.11725500  | -0.33537600 | 0.27740200  |
| H     | -3.03110300 | 1.15779400  | 1.55108300  | F | 3.05829000  | 0.79586100  | 1.00058600  |
| H     | -4.29975000 | -0.06620700 | 1.60989500  | C | 4.37705900  | -0.88349300 | 0.09952000  |
| H     | -0.89435600 | -0.60668700 | 1.41494000  | F | 5.45763400  | -0.31139700 | 0.63386200  |
| C     | 1.82333400  | -0.78548600 | 3.59921400  | C | 4.50926100  | -2.04883100 | -0.64428600 |
| C     | 0.96248200  | -0.15435200 | 2.70912300  | F | 5.70792900  | -2.60139800 | -0.82769400 |
| C     | 0.31061500  | -0.87022700 | 1.68325100  | C | 3.37759600  | -2.62609900 | -1.19194100 |
| C     | 0.53502200  | -2.26789400 | 1.63829700  | F | 3.48140600  | -3.74954100 | -1.90664800 |
| C     | 1.38333600  | -2.90662400 | 2.52657200  | C | 2.13398600  | -2.03204300 | -0.98973400 |
| C     | 2.03796100  | -2.15802000 | 3.50658600  | F | 1.09954700  | -2.68234600 | -1.56508700 |
| H     | 2.33363600  | -0.20708700 | 4.36221600  | C | 0.53928100  | 1.46547800  | -0.22146500 |
| H     | 0.81428600  | 0.91447600  | 2.79673100  | C | -0.32989100 | 2.38037900  | 0.36135900  |
| H     | 0.07063600  | -2.84903000 | 0.84512900  | F | -1.25230100 | 1.95749500  | 1.26981800  |
| H     | 1.55083600  | -3.97607100 | 2.45338600  | C | -0.37713600 | 3.73932900  | 0.08165500  |
| H     | 2.71692300  | -2.64737800 | 4.19852000  | F | -1.25807600 | 4.53221600  | 0.69725500  |
|       |             |             |             | C | 0.49586900  | 4.25788700  | -0.86020100 |
| N15_P |             |             |             | F | 0.47683200  | 5.55449800  | -1.15974800 |
| N     | -2.58525100 | -0.51137200 | 0.92042500  | C | 1.37649500  | 3.39671400  | -1.49701400 |

|        |             |             |             |   |             |             |             |
|--------|-------------|-------------|-------------|---|-------------|-------------|-------------|
| F      | 2.20870600  | 3.87376900  | -2.42161000 | C | 3.44545800  | -0.26439900 | 1.54957300  |
| C      | 1.37669000  | 2.04281000  | -1.17823000 | C | 4.09502200  | 0.92639700  | 1.89307200  |
| F      | 2.24405500  | 1.29854600  | -1.87629200 | H | 3.69615100  | 1.86913300  | 1.52565600  |
| H      | -4.80333900 | -2.08424000 | 0.10899000  | C | 5.23166900  | 0.93173800  | 2.69588900  |
| H      | -3.89091600 | -0.47173700 | 3.40192600  | H | 5.71050600  | 1.87283400  | 2.94691900  |
| H      | -2.57801300 | -2.12686800 | 2.25433200  | C | 5.75006900  | -0.26792200 | 3.17253000  |
| H      | -2.31395200 | -2.56085800 | 0.57526500  | H | 6.63667200  | -0.27209100 | 3.79811600  |
| H      | -3.34448000 | 1.43017800  | 1.04320300  | C | 5.12007200  | -1.46340400 | 2.84040400  |
| H      | -4.57931700 | 0.16104800  | 1.04658000  | H | 5.51364300  | -2.40565300 | 3.20850500  |
| H      | -1.71586400 | -0.31858100 | 1.44802900  | C | 3.98081800  | -1.46316100 | 2.03963500  |
| C      | 0.46435400  | 0.14946200  | 4.12506600  | H | 3.51013300  | -2.41015700 | 1.80486500  |
| C      | 0.56566800  | 0.48625200  | 2.77624200  | C | -1.95113700 | -0.63876400 | 0.57609300  |
| C      | 0.37754500  | -0.45745700 | 1.75295500  | C | -2.94350300 | -0.30774400 | -0.35747500 |
| C      | 0.13621300  | -1.77863000 | 2.17416600  | F | -2.63408500 | 0.37373500  | -1.47239500 |
| C      | 0.03037200  | -2.13236100 | 3.51856100  | C | -4.29130900 | -0.60777600 | -0.22255000 |
| C      | 0.18061700  | -1.16037800 | 4.50442500  | F | -5.15743500 | -0.26766600 | -1.17637200 |
| H      | 0.61692100  | 0.91221400  | 4.88314000  | C | -4.73791000 | -1.24163900 | 0.92546400  |
| H      | 0.81284700  | 1.51095500  | 2.51395900  | F | -6.02492700 | -1.53627400 | 1.08188700  |
| H      | 0.04647700  | -2.56301300 | 1.42178200  | C | -3.81643500 | -1.53972400 | 1.91259600  |
| H      | -0.15476100 | -3.16699700 | 3.79482200  | F | -4.21916500 | -2.11015900 | 3.04776700  |
| H      | 0.10092200  | -1.42420200 | 5.55441900  | C | -2.47329700 | -1.22205500 | 1.73141100  |
| N16_TS |             |             |             | F | -1.71000400 | -1.49144900 | 2.80441900  |
| N      | 2.45496600  | -0.69926000 | -0.73161200 | C | -0.41044700 | 1.39038600  | -0.10806600 |
| H      | 0.95764500  | -0.81054500 | -1.10463300 | C | 0.23134000  | 2.06535800  | -1.13957400 |
| B      | -0.38833700 | -0.22561000 | 0.23470000  | F | 1.00481800  | 1.39768200  | -2.02219900 |
| C      | 2.21616700  | -0.17571500 | 0.65115600  | C | 0.15060800  | 3.43428300  | -1.36866500 |
| H      | 2.08266600  | 0.89642900  | 0.46613600  | F | 0.79867100  | 3.98326800  | -2.39609600 |
| C      | 0.84757200  | -0.59960400 | 1.29203700  | C | -0.60529900 | 4.22145000  | -0.51814300 |
| C      | 2.91945000  | -2.09271000 | -0.89396800 | F | -0.69805400 | 5.53337800  | -0.70868600 |
| H      | 2.24878900  | -2.76267000 | -0.36021300 | C | -1.25763200 | 3.61328500  | 0.54419000  |
| H      | 3.92627000  | -2.20344300 | -0.46482200 | F | -1.97661300 | 4.34911800  | 1.38893800  |
| C      | 2.94258500  | -2.49425600 | -2.37009500 | C | -1.14973600 | 2.24064000  | 0.72449200  |
| H      | 1.92283200  | -2.44757100 | -2.77259600 | F | -1.79992000 | 1.75841700  | 1.79285000  |
| H      | 3.26970900  | -3.53683900 | -2.43687800 | C | 0.70301400  | 0.32887600  | 2.52484600  |
| C      | 3.85745300  | -1.57794800 | -3.17632900 | H | 1.48919600  | 0.10869500  | 3.25460900  |
| H      | 4.89510500  | -1.71077100 | -2.84197200 | H | 0.79790700  | 1.38561900  | 2.25469000  |
| H      | 3.82472800  | -1.83359600 | -4.23947100 | H | -0.25996800 | 0.18896100  | 3.01476300  |
| C      | 3.43352300  | -0.13018500 | -2.94736300 | C | 0.89003000  | -2.04633300 | 1.85248300  |
| H      | 4.11946400  | 0.56640800  | -3.43944000 | H | -0.10238500 | -2.46406400 | 1.99418500  |
| H      | 2.43618700  | 0.03589100  | -3.36973400 | H | 1.44627800  | -2.74749100 | 1.23288300  |
| C      | 3.39863200  | 0.18361600  | -1.45681800 | H | 1.37777400  | -2.05306000 | 2.83282800  |
| H      | 4.40425900  | 0.05283000  | -1.02422700 | C | -1.43070900 | -3.00970600 | -3.21354600 |
| H      | 3.10142700  | 1.21901400  | -1.29010200 | C | -1.24188200 | -1.67125800 | -3.54178700 |
|        |             |             |             | C | -0.61858300 | -0.81642300 | -2.63997200 |

|       |             |             |             |        |             |             |             |
|-------|-------------|-------------|-------------|--------|-------------|-------------|-------------|
| C     | -0.16399400 | -1.26128600 | -1.38022400 | F      | 2.68877100  | 0.21179300  | 1.64055500  |
| C     | -0.35699800 | -2.63552100 | -1.09471400 | C      | 4.39944000  | -0.73081400 | 0.43154700  |
| C     | -0.98683800 | -3.49308700 | -1.98167900 | F      | 5.23249000  | -0.39623800 | 1.41822500  |
| H     | -1.92157000 | -3.67828000 | -3.91444800 | C      | 4.88809000  | -1.35669200 | -0.70404500 |
| H     | -1.58486100 | -1.29092000 | -4.49819400 | F      | 6.18286400  | -1.64532600 | -0.82059900 |
| H     | -0.48145900 | 0.21812700  | -2.92322500 | C      | 3.99924400  | -1.65951300 | -1.71776300 |
| H     | -0.04143900 | -3.03137500 | -0.13735100 | F      | 4.43939100  | -2.23974500 | -2.83637400 |
| H     | -1.13495700 | -4.53547500 | -1.71950900 | C      | 2.64924900  | -1.34404400 | -1.58008200 |
| N16_P |             |             |             | F      | 1.92400700  | -1.64123800 | -2.67899300 |
| N     | -2.58096200 | -0.59318300 | 0.59602500  | C      | 0.54045800  | 1.33513200  | 0.17830600  |
| H     | -1.75734800 | -0.47692100 | 1.20805200  | C      | -0.26829800 | 2.06613100  | 1.04238100  |
| B     | 0.50588600  | -0.33279900 | -0.05942500 | F      | -1.25030800 | 1.45133400  | 1.76219500  |
| C     | -2.08617100 | -0.12128400 | -0.78571800 | C      | -0.21486600 | 3.44000800  | 1.24671600  |
| H     | -1.92925300 | 0.94287800  | -0.58490400 | F      | -1.04630100 | 4.02978000  | 2.10878600  |
| C     | -0.68194800 | -0.63968600 | -1.24514400 | C      | 0.70040500  | 4.19033400  | 0.53144400  |
| C     | -3.02321200 | -2.01651700 | 0.77539500  | F      | 0.78036900  | 5.50772200  | 0.69554300  |
| H     | -2.24315900 | -2.66275200 | 0.38635700  | C      | 1.51369800  | 3.53781600  | -0.38177600 |
| H     | -3.93972100 | -2.13904500 | 0.19315200  | F      | 2.37930700  | 4.24059200  | -1.11000200 |
| C     | -3.24959300 | -2.30534200 | 2.25503300  | C      | 1.41217600  | 2.16130600  | -0.54547100 |
| H     | -2.29402100 | -2.19543900 | 2.78212700  | F      | 2.20752000  | 1.66576500  | -1.50346400 |
| H     | -3.54466000 | -3.35447800 | 2.34989800  | C      | -0.38529900 | 0.25323300  | -2.47739500 |
| C     | -4.29880600 | -1.37426400 | 2.85739800  | H      | -1.07425300 | 0.03391000  | -3.30121200 |
| H     | -5.27747300 | -1.57160000 | 2.40101200  | H      | -0.48424200 | 1.31830200  | -2.24131200 |
| H     | -4.39978800 | -1.55595400 | 3.93046700  | H      | 0.62904300  | 0.08672600  | -2.83601100 |
| C     | -3.89892100 | 0.07663800  | 2.59556500  | C      | -0.75083000 | -2.09265900 | -1.77096600 |
| H     | -4.67046100 | 0.77205400  | 2.93801000  | H      | 0.24444200  | -2.50056700 | -1.92028100 |
| H     | -2.97853300 | 0.31941200  | 3.14095300  | H      | -1.27538500 | -2.78843100 | -1.11668100 |
| C     | -3.66668800 | 0.31400100  | 1.11028100  | H      | -1.25366600 | -2.12561100 | -2.74396100 |
| H     | -4.55956400 | 0.09227500  | 0.51807200  | C      | 0.11373100  | -2.90122900 | 3.63884900  |
| H     | -3.35788900 | 1.33940000  | 0.91112000  | C      | 0.18332200  | -1.51913700 | 3.77493800  |
| C     | -3.22486500 | -0.19253800 | -1.78895200 | C      | 0.27263600  | -0.70158200 | 2.64667800  |
| C     | -3.75151300 | 1.01236300  | -2.26737500 | C      | 0.28322400  | -1.21319900 | 1.33597200  |
| H     | -3.33602700 | 1.95082400  | -1.90789700 | C      | 0.24746600  | -2.61989800 | 1.24447000  |
| C     | -4.78273200 | 1.03166300  | -3.20084400 | C      | 0.15611300  | -3.45058400 | 2.35894700  |
| H     | -5.16730600 | 1.98057600  | -3.56007800 | H      | 0.05401400  | -3.54148800 | 4.51355500  |
| C     | -5.31547600 | -0.16446000 | -3.67102100 | H      | 0.19480000  | -1.06924300 | 4.76364000  |
| H     | -6.12062500 | -0.15620400 | -4.39840900 | H      | 0.39125100  | 0.36379900  | 2.80649100  |
| C     | -4.80398600 | -1.37248100 | -3.20620700 | H      | 0.34764300  | -3.08713400 | 0.26917400  |
| H     | -5.20634700 | -2.31086100 | -3.57387500 | H      | 0.14353700  | -4.52891900 | 2.22747500  |
| C     | -3.76635200 | -1.38864900 | -2.27820500 | N17_TS |             |             |             |
| H     | -3.37183000 | -2.34304300 | -1.95009900 | B      | 0.01774600  | -0.18264200 | 0.16623100  |
| C     | 2.08611500  | -0.75011400 | -0.45246100 | N      | -2.56292900 | -1.66961700 | -0.35048900 |
| C     | 3.04604500  | -0.44329700 | 0.52238300  | H      | -1.27089200 | -1.18188600 | -0.99566600 |

|   |             |             |             |       |             |             |             |
|---|-------------|-------------|-------------|-------|-------------|-------------|-------------|
| C | -2.38505200 | -0.97191700 | 0.95155000  | C     | 4.47960800  | -0.53102900 | 0.37797200  |
| H | -2.72863500 | 0.05736900  | 0.77226900  | F     | 5.80485500  | -0.64654100 | 0.40135600  |
| C | -0.88637300 | -0.91565000 | 1.30676500  | C     | 3.86801100  | 0.38814100  | -0.46076300 |
| H | -0.55081500 | -1.95231100 | 1.45008600  | F     | 4.60947400  | 1.16044800  | -1.25455800 |
| C | -3.83821100 | -1.35692000 | -1.05589800 | C     | 2.48424400  | 0.48797500  | -0.46717200 |
| H | -4.48039400 | -0.77121400 | -0.38947600 | F     | 1.97046700  | 1.39101600  | -1.31767000 |
| H | -3.63625700 | -0.75057800 | -1.93937900 | C     | 1.02365600  | -0.92496000 | -3.59858500 |
| C | -4.48593900 | -2.70254600 | -1.41731900 | C     | 0.13810700  | -0.44255200 | -2.64125800 |
| H | -4.20687800 | -2.99254700 | -2.43503100 | C     | -0.11585700 | -1.15597100 | -1.45418300 |
| H | -5.57583500 | -2.65792400 | -1.37046000 | C     | 0.51545900  | -2.41556600 | -1.30979500 |
| C | -3.87119200 | -3.68091400 | -0.41503000 | C     | 1.39090200  | -2.90872300 | -2.26144700 |
| H | -3.90661100 | -4.72039900 | -0.74838900 | C     | 1.65404800  | -2.15171200 | -3.40569500 |
| H | -4.37555800 | -3.61149200 | 0.55360900  | H     | 1.22973600  | -0.34400500 | -4.49140200 |
| C | -2.44586400 | -3.14656200 | -0.31034300 | H     | -0.34194100 | 0.51553900  | -2.80339400 |
| H | -1.86455400 | -3.46601600 | -1.18572000 | H     | 0.35690400  | -2.97879800 | -0.39188800 |
| H | -1.90495300 | -3.46876700 | 0.58194700  | H     | 1.88068200  | -3.86579100 | -2.11546600 |
| C | -3.24313500 | -1.56095400 | 2.07946400  | H     | 2.35306600  | -2.52303100 | -4.14910900 |
| H | -2.97641200 | -2.61546200 | 2.23055300  |       |             |             |             |
| H | -4.30336100 | -1.53448500 | 1.79711000  | N17_P |             |             |             |
| C | -3.02268600 | -0.81860600 | 3.39814600  | B     | -0.14885800 | -0.19713500 | 0.01310100  |
| H | -3.35775100 | 0.22220500  | 3.29296300  | N     | 2.80382300  | -1.30980400 | 0.04119800  |
| H | -3.63488900 | -1.27028800 | 4.18535900  | H     | 2.15118000  | -1.02108100 | 0.78576700  |
| C | -1.54269000 | -0.83438600 | 3.77561900  | C     | 2.24927800  | -0.64267700 | -1.21847100 |
| H | -1.21769000 | -1.87139600 | 3.93722700  | H     | 2.51318800  | 0.41473400  | -1.08555500 |
| H | -1.38332900 | -0.30035300 | 4.71814900  | C     | 0.72065500  | -0.77688400 | -1.29038300 |
| C | -0.70596800 | -0.20537000 | 2.66304100  | H     | 0.50724600  | -1.84657100 | -1.42515700 |
| H | 0.35325700  | -0.20034400 | 2.93542300  | C     | 4.20179700  | -0.85361400 | 0.40763400  |
| H | -1.00645700 | 0.84685200  | 2.56110700  | H     | 4.61330600  | -0.33733400 | -0.46075600 |
| C | -0.47026300 | 1.36610400  | -0.03790100 | H     | 4.12867200  | -0.14505200 | 1.22975300  |
| C | 0.12256000  | 2.38765500  | 0.70802600  | C     | 4.98137800  | -2.12734700 | 0.73035600  |
| F | 1.11259700  | 2.11163300  | 1.56859800  | H     | 4.87383500  | -2.38030500 | 1.78937300  |
| C | -0.25472400 | 3.72156800  | 0.63573500  | H     | 6.04480400  | -2.01062700 | 0.51558100  |
| F | 0.35980200  | 4.64044200  | 1.37813300  | C     | 4.29537800  | -3.18768600 | -0.13415500 |
| C | -1.28679900 | 4.09705000  | -0.21210000 | H     | 4.49085500  | -4.20763600 | 0.20079100  |
| F | -1.66133400 | 5.36983900  | -0.29959600 | H     | 4.60994400  | -3.10226300 | -1.17844700 |
| C | -1.92543600 | 3.12280700  | -0.96040500 | C     | 2.82636900  | -2.82228500 | 0.02373800  |
| F | -2.92933000 | 3.45188300  | -1.77387700 | H     | 2.43878400  | -3.14982000 | 0.99025200  |
| C | -1.51348400 | 1.80054200  | -0.84428100 | H     | 2.15723500  | -3.18715200 | -0.75419600 |
| F | -2.20615300 | 0.91401000  | -1.59160100 | C     | 2.96560300  | -1.18240700 | -2.45941600 |
| C | 1.63860600  | -0.28674100 | 0.32945600  | H     | 2.75731200  | -2.25483800 | -2.56635300 |
| C | 2.30541100  | -1.19825500 | 1.14425700  | H     | 4.05354800  | -1.06935500 | -2.37425600 |
| F | 1.62826400  | -2.04686500 | 1.94041600  | C     | 2.46611700  | -0.47211300 | -3.71994400 |
| C | 3.68862700  | -1.33135900 | 1.18680400  | H     | 2.73447400  | 0.59131600  | -3.66698500 |
| F | 4.25668500  | -2.22933800 | 1.99256300  | H     | 2.97641900  | -0.88610100 | -4.59502300 |

|        |             |             |             |   |             |             |             |
|--------|-------------|-------------|-------------|---|-------------|-------------|-------------|
| C      | 0.95030600  | -0.60531500 | -3.84226300 | C | -0.99985400 | -0.83345100 | -0.70458100 |
| H      | 0.68228200  | -1.66192200 | -3.97758700 | H | -1.23978300 | -0.20828800 | -1.55710900 |
| H      | 0.59630900  | -0.06998400 | -4.72919800 | C | -0.88610500 | -2.25300900 | -1.31348200 |
| C      | 0.27291600  | -0.06611400 | -2.58490700 | H | -0.07842900 | -2.36888000 | -2.03682300 |
| H      | -0.81320500 | -0.13752600 | -2.67467200 | C | -0.87846200 | -3.31596300 | -0.18359800 |
| H      | 0.50389100  | 1.00550600  | -2.49627700 | H | -0.24673500 | -2.98768900 | 0.64946800  |
| C      | 0.16691200  | 1.43032900  | 0.10294900  | H | -0.47428700 | -4.27298700 | -0.52281300 |
| C      | -0.65166500 | 2.41463900  | -0.45618100 | C | -2.37905700 | -3.43697400 | 0.22433300  |
| F      | -1.77817700 | 2.08330500  | -1.10170700 | H | -2.54075500 | -3.33939800 | 1.30401500  |
| C      | -0.37667300 | 3.77612200  | -0.41474100 | H | -2.81006900 | -4.39637500 | -0.07648900 |
| F      | -1.21192300 | 4.65340100  | -0.96951400 | C | -2.30679900 | -2.43572700 | -1.92993900 |
| C      | 0.78505900  | 4.22799400  | 0.19430200  | C | -4.54403500 | -2.27202500 | -0.56081900 |
| F      | 1.06616500  | 5.52807900  | 0.24055200  | H | -4.94927000 | -1.40156100 | -1.08878900 |
| C      | 1.65460000  | 3.29800600  | 0.73733400  | H | -4.94447400 | -2.26852600 | 0.45823400  |
| F      | 2.79732000  | 3.69101300  | 1.30548900  | H | -4.92706500 | -3.17072400 | -1.05647500 |
| C      | 1.32600500  | 1.95015300  | 0.66498800  | C | -2.73320500 | -1.40073100 | -2.97830000 |
| F      | 2.26906000  | 1.11372400  | 1.18260500  | H | -2.98929800 | -0.42649600 | -2.56276800 |
| C      | -1.77080100 | -0.48782200 | -0.16443200 | H | -3.62113300 | -1.76033800 | -3.50922700 |
| C      | -2.36447200 | -1.45496400 | -0.96690900 | H | -1.94127300 | -1.25102200 | -3.72044100 |
| F      | -1.63507700 | -2.20698500 | -1.82252500 | C | -2.47669100 | -3.80874200 | -2.59696600 |
| C      | -3.72644300 | -1.74554800 | -0.96214300 | H | -3.53623200 | -4.04985000 | -2.73887700 |
| F      | -4.21858500 | -2.68910500 | -1.76918700 | H | -2.01320800 | -4.62969600 | -2.04873300 |
| C      | -4.56806200 | -1.06010500 | -0.10508800 | H | -2.01656800 | -3.78180200 | -3.59020800 |
| F      | -5.87402000 | -1.32320300 | -0.07970000 | N | -2.90464000 | 0.27590400  | 0.43066700  |
| C      | -4.02820100 | -0.09516500 | 0.73495800  | H | -1.46974500 | 0.60784100  | 1.05403200  |
| F      | -4.82133900 | 0.56844600  | 1.57759900  | C | -3.33147500 | 1.20903100  | -0.61719100 |
| C      | -2.66601100 | 0.15349200  | 0.69357700  | H | -4.29685000 | 0.88793800  | -1.04376800 |
| F      | -2.21081800 | 1.08279400  | 1.55080800  | H | -2.59071200 | 1.21500800  | -1.41457200 |
| C      | 0.54369200  | -1.18073200 | 3.82929700  | C | -3.46405100 | 2.61906300  | -0.04334400 |
| C      | 0.39774300  | -0.41969000 | 2.66869600  | H | -3.78961600 | 3.29766300  | -0.83761600 |
| C      | 0.14368700  | -1.00716000 | 1.41944700  | H | -2.47076300 | 2.95483000  | 0.28384000  |
| C      | 0.00085100  | -2.40928400 | 1.41395500  | C | -4.43365600 | 2.64838900  | 1.13632900  |
| C      | 0.13980500  | -3.18098800 | 2.56407200  | H | -5.44262800 | 2.40142600  | 0.77880800  |
| C      | 0.42551900  | -2.56578000 | 3.78197300  | H | -4.48514100 | 3.65048500  | 1.57224000  |
| H      | 0.73622800  | -0.68511300 | 4.77638500  | C | -4.00531700 | 1.62261800  | 2.18431100  |
| H      | 0.46230400  | 0.66204600  | 2.74650300  | H | -3.04436900 | 1.91722200  | 2.62529800  |
| H      | -0.25531600 | -2.90534700 | 0.47693900  | H | -4.73416200 | 1.56501700  | 2.99876000  |
| H      | 0.01093200  | -4.25887600 | 2.51434700  | C | -3.85495200 | 0.24193800  | 1.55083800  |
| H      | 0.53179600  | -3.15796300 | 4.68564600  | H | -3.47841600 | -0.47657000 | 2.28750100  |
|        |             |             |             | H | -4.83554000 | -0.11879200 | 1.20370200  |
| N18_TS |             |             |             | B | 0.19313400  | -0.02589800 | 0.09976300  |
| C      | -3.02775600 | -2.27332100 | -0.55851800 | C | 0.71567200  | 1.38262700  | -0.58685300 |
| C      | -2.30831900 | -1.02304700 | 0.09408100  | F | -0.72467600 | 1.50350800  | -2.51056800 |
| H      | -2.04726000 | -1.38221600 | 1.09052200  | C | 0.29531800  | 1.98516600  | -1.77279700 |

|       |             |             |             |   |             |             |             |
|-------|-------------|-------------|-------------|---|-------------|-------------|-------------|
| F     | 0.40718000  | 3.64137900  | -3.45359900 | H | 2.36083700  | -4.15366900 | 1.31080900  |
| C     | 0.87792000  | 3.12691900  | -2.31800800 | C | 2.17450100  | -1.61437000 | 2.49256800  |
| F     | 2.52151900  | 4.81152200  | -2.19419600 | C | 4.31279000  | -2.35644900 | 1.17280600  |
| C     | 1.95361800  | 3.72275300  | -1.68547400 | H | 4.95362900  | -1.49113600 | 1.37422400  |
| F     | 3.45850000  | 3.72225800  | 0.12599900  | H | 4.65370300  | -2.83500500 | 0.24910800  |
| C     | 2.42502800  | 3.16659000  | -0.50476400 | H | 4.48455800  | -3.07396800 | 1.98145000  |
| F     | 2.31439500  | 1.57186400  | 1.15700800  | C | 2.71217100  | -0.35550800 | 3.18570900  |
| C     | 1.81187600  | 2.03043100  | 0.00134700  | H | 2.44161700  | 0.58169900  | 2.70671100  |
| C     | 1.54067200  | -0.94342500 | 0.28615000  | H | 3.80410400  | -0.39791900 | 3.28732200  |
| F     | 1.59415000  | -0.93547500 | -2.08494400 | H | 2.30230600  | -0.30471000 | 4.19871300  |
| C     | 2.11619200  | -1.35808100 | -0.91837800 | C | 2.26995800  | -2.71354700 | 3.56760700  |
| F     | 3.71070600  | -2.53434800 | -2.20880700 | H | 3.28497600  | -2.76607500 | 3.97783700  |
| C     | 3.23358700  | -2.17349700 | -1.01778900 | H | 1.99582100  | -3.71220700 | 3.23000600  |
| F     | 4.94346000  | -3.37361000 | 0.08145800  | H | 1.60216300  | -2.45575800 | 4.39541500  |
| C     | 3.86850200  | -2.59173500 | 0.14219800  | N | 3.17154600  | 0.11083000  | -0.47335000 |
| F     | 3.99587200  | -2.51833500 | 2.48967600  | H | 2.51909700  | 0.63788400  | -1.07912900 |
| C     | 3.37689400  | -2.16281900 | 1.36325400  | C | 3.73529100  | 1.11402600  | 0.48385000  |
| F     | 1.91843000  | -0.92605500 | 2.64213600  | H | 4.38081600  | 0.57458800  | 1.18097800  |
| C     | 2.25482600  | -1.33998400 | 1.41303200  | H | 2.89648100  | 1.53740900  | 1.03273100  |
| C     | -0.06556100 | 2.18901000  | 3.58037200  | C | 4.49118000  | 2.21379100  | -0.25228600 |
| C     | -0.22198500 | 1.87958500  | 2.23977200  | H | 4.88820300  | 2.90448000  | 0.49684300  |
| C     | -0.49794200 | 0.56498200  | 1.79057900  | H | 3.78037400  | 2.77685800  | -0.87039700 |
| C     | -0.61983000 | -0.42365800 | 2.79937500  | C | 5.59804200  | 1.64329200  | -1.13327200 |
| C     | -0.47671300 | -0.12539600 | 4.14681300  | H | 6.34396800  | 1.13361900  | -0.50912600 |
| C     | -0.19811000 | 1.18179100  | 4.53749000  | H | 6.11555500  | 2.44563700  | -1.66512300 |
| H     | 0.15044500  | 3.20739700  | 3.88536700  | C | 4.98397200  | 0.65515500  | -2.12109700 |
| H     | -0.15667100 | 2.67792700  | 1.50476500  | H | 4.29786400  | 1.17936400  | -2.79506800 |
| H     | -0.78985200 | -1.46024200 | 2.51915200  | H | 5.75028300  | 0.17784400  | -2.73890200 |
| H     | -0.56129800 | -0.9073700  | 4.89030000  | C | 4.22733600  | -0.44399100 | -1.38909600 |
| H     | -0.07926900 | 1.41739000  | 5.59090900  | H | 3.70971400  | -1.10852200 | -2.08458400 |
|       |             |             |             | H | 4.90839400  | -1.03045600 | -0.77431500 |
| N18_P |             |             |             | B | -0.32510300 | 0.08340200  | -0.25616600 |
| C     | 2.82834100  | -2.02601600 | 1.12993600  | C | -1.19282800 | 1.27775600  | 0.50954900  |
| C     | 2.25436200  | -0.99412900 | 0.08922800  | F | -0.27400800 | 1.11923400  | 2.71316900  |
| H     | 2.02953600  | -1.53417500 | -0.83476300 | C | -1.13691200 | 1.68024200  | 1.83929600  |
| C     | 0.94424300  | -0.44425900 | 0.73486700  | F | -1.82047900 | 3.01417900  | 3.67159900  |
| H     | 1.23004000  | 0.49147900  | 1.22109000  | C | -1.94044100 | 2.67808100  | 2.38499700  |
| C     | 0.76083900  | -1.47807100 | 1.87907900  | F | -3.63945000 | 4.28731400  | 2.08807400  |
| H     | -0.00456100 | -1.18683700 | 2.59259600  | C | -2.86566200 | 3.32638900  | 1.58590500  |
| C     | 0.54909000  | -2.87832200 | 1.25464400  | F | -3.85640400 | 357878000   | -0.53541300 |
| H     | -0.15016100 | -2.84936300 | 0.41945100  | C | -2.97237700 | 2.9645100   | 0.25036100  |
| H     | 0.15152000  | -3.58629800 | 1.98616800  | F | -2.30604100 | 1.66137100  | -1.54460300 |
| C     | 1.97442200  | -3.27698500 | 0.78498300  | C | -2.15002100 | 1.6164000   | -0.24602200 |
| H     | 2.02517800  | -3.50959100 | -0.28349300 | C | -1.52873200 | -100470700  | -0.65326700 |

|        |             |             |             |   |             |             |             |
|--------|-------------|-------------|-------------|---|-------------|-------------|-------------|
| F      | -1.96945000 | -1.33176600 | 1.65799800  | H | -5.02871500 | -1.30541300 | -2.89908800 |
| C      | -2.28087200 | -1.5357900  | 0.37419900  | C | -3.92284900 | 0.35031500  | -2.08041400 |
| F      | -4.00403600 | -2.95077100 | 1.24373900  | H | -4.37471200 | 1.12883700  | -2.70548600 |
| C      | -3.36875000 | -4.2449400  | 0.19459000  | H | -3.01828800 | 0.01151500  | -2.59831900 |
| F      | -4.84690900 | -3.50397400 | -1.29771300 | C | -3.50899000 | 1.00763400  | -0.75120900 |
| C      | -3.80603400 | -2.69981800 | -1.09172800 | C | -2.41692900 | 2.02984200  | -1.09969000 |
| F      | -3.56280900 | -2.33054900 | -3.40138700 | H | -1.46587500 | 1.55152200  | -1.31979100 |
| C      | -3.14412500 | -2.11040000 | -2.15314800 | H | -2.25205400 | 2.77077500  | -0.31336200 |
| F      | -1.56051500 | -0.70601800 | -3.02783100 | H | -2.73745100 | 2.57721100  | -1.99064900 |
| C      | -2.05748900 | -1.27013100 | -1.91773900 | C | -4.68739600 | 1.82739400  | -0.18132600 |
| C      | 1.50419700  | 2.69631500  | -2.61593400 | H | -4.53077200 | 2.09995600  | 0.86564300  |
| C      | 0.75878400  | 2.12111500  | -1.58263400 | H | -5.65114100 | 1.32917600  | -0.26915300 |
| C      | 0.42590800  | 0.75453200  | -1.55619600 | H | -4.75721000 | 2.75941900  | -0.74965200 |
| C      | 0.93551900  | -0.01300800 | -2.62461200 | C | -5.21064400 | -0.86610700 | 1.17160800  |
| C      | 1.68106400  | 0.54333700  | -3.66160900 | H | -5.00895400 | -0.24211100 | 2.04696600  |
| C      | 1.96291300  | 1.91053500  | -3.66836800 | H | -5.65592200 | -1.79551400 | 1.53850700  |
| H      | 1.71148000  | 3.76300900  | -2.60218000 | H | -5.96277500 | -0.37066900 | 0.56201800  |
| H      | 0.40791500  | 2.76360800  | -0.77785900 | C | -3.26919200 | -2.35193400 | 1.25040100  |
| H      | 0.71157800  | -1.07652700 | -2.66353500 | H | -2.23097300 | -2.53117100 | 0.99218100  |
| H      | 2.02781200  | -0.08694600 | -4.47628300 | H | -3.83353000 | -3.26912100 | 1.05558100  |
| H      | 2.52671700  | 2.35341700  | -4.48409400 | H | -3.31596700 | -2.15491100 | 2.32028900  |
| N19_TS |             |             |             | C | 2.02106900  | -0.83271000 | 0.15888500  |
| B      | 0.45578800  | -0.32263400 | 0.30062700  | C | 2.62475400  | -1.58195700 | -0.84553800 |
| C      | -0.19870100 | -0.72639800 | 1.74741300  | F | 1.92392000  | -2.07022800 | -1.87958800 |
| C      | 0.51071100  | -1.59846400 | 2.58849200  | C | 3.98821400  | -1.86453800 | -0.88397700 |
| H      | 1.45056100  | -2.01470800 | 2.23825900  | F | 4.49289500  | -2.60030800 | -1.87558600 |
| C      | 0.08452500  | -1.95583300 | 3.86470200  | C | 4.82382700  | -1.36871800 | 0.10076600  |
| H      | 0.68626300  | -2.62942700 | 4.46692800  | F | 6.12867500  | -1.62908200 | 0.07581200  |
| C      | -1.09175900 | -1.41907700 | 4.36693300  | C | 4.28123500  | -0.58457600 | 1.10946800  |
| H      | -1.42819100 | -1.65048300 | 5.37248000  | F | 5.07016500  | -0.08286200 | 2.05953400  |
| C      | -1.84833000 | -0.59415800 | 3.54357000  | C | 2.91889100  | -0.32712200 | 1.10632600  |
| H      | -2.79626000 | -0.20423900 | 3.90970300  | F | 2.46612200  | 0.46634800  | 2.08870600  |
| C      | -1.45220500 | -0.28438600 | 2.24034200  | C | 0.60626300  | 1.28097600  | -0.03216300 |
| C      | -2.42771200 | 0.55792100  | 1.43742900  | C | 0.41822800  | 2.32200900  | 0.87797600  |
| H      | -1.92504800 | 1.47498900  | 1.13921200  | F | 0.00523200  | 2.09083500  | 2.12999100  |
| H      | -3.24829900 | 0.85857300  | 2.10004600  | C | 0.61926800  | 3.66433300  | 0.57006000  |
| N      | -2.96343500 | -0.05899600 | 0.19380600  | F | 0.38632000  | 4.60759900  | 1.48202200  |
| C      | -3.91369500 | -1.22893500 | 0.41862500  | C | 1.07807400  | 4.02130900  | -0.68714400 |
| C      | -4.24546200 | -1.83115900 | -0.95820200 | F | 1.27078900  | 5.29880200  | -1.00044200 |
| H      | -3.31864800 | -2.23640100 | -1.38998000 | C | 1.35269000  | 3.02210100  | -1.60889200 |
| H      | -4.92077100 | -2.67850600 | -0.79708300 | F | 1.83771800  | 3.33846700  | -2.80911300 |
| C      | -4.86160600 | -0.83370000 | -1.92579500 | C | 1.14382900  | 1.69661100  | -1.25473300 |
| H      | -5.84558800 | -0.50736100 | -1.57040400 | F | 1.50022800  | 0.79189900  | -2.18366800 |
|        |             |             |             | H | -1.56242900 | -0.64688600 | -0.39888500 |

|       |             |             |             |   |             |             |             |
|-------|-------------|-------------|-------------|---|-------------|-------------|-------------|
| C     | -0.56926200 | -1.19344900 | -0.92818300 | H | -4.24480500 | 1.90468200  | 1.83926300  |
| C     | -0.51690400 | -2.59067100 | -0.65513600 | H | -5.61964800 | 1.26329000  | 0.92004900  |
| C     | -0.63597500 | -0.84347300 | -2.30316600 | H | -4.94102200 | 2.83326200  | 0.52313600  |
| C     | -0.56987700 | -3.54954700 | -1.65047800 | C | -4.93449100 | -1.32862300 | 1.46049700  |
| H     | -0.39773200 | -2.90898700 | 0.37731700  | H | -4.43026400 | -1.13623100 | 2.40913600  |
| C     | -0.69474900 | -1.79234600 | -3.31195500 | H | -5.36562500 | -2.33098400 | 1.52707900  |
| H     | -0.68336400 | 0.20389900  | -2.58225400 | H | -5.75946100 | -0.62673500 | 1.34662100  |
| C     | -0.67192100 | -3.14712900 | -2.98308200 | C | -3.10052300 | -2.60398500 | 0.33834500  |
| H     | -0.52139800 | -4.60409500 | -1.40081700 | H | -2.25886800 | -2.54680900 | -0.35420700 |
| H     | -0.75966400 | -1.48367000 | -4.34990100 | H | -3.73651100 | -3.43365700 | 0.01499400  |
| H     | -0.72307600 | -3.89364400 | -3.77056800 | H | -2.72462900 | -2.83003900 | 1.33356000  |
| N19_P |             |             |             | C | 2.27349000  | -0.77070200 | -0.03931700 |
| B     | 0.64300800  | -0.48442200 | 0.03078300  | C | 2.99069100  | -1.21520300 | -1.14738900 |
| C     | -0.01688800 | -1.18943600 | 1.38343100  | F | 2.38256300  | -1.52644200 | -2.29917400 |
| C     | 0.69195500  | -2.25999200 | 1.95930200  | C | 4.37656300  | -1.36277200 | -1.15363500 |
| H     | 1.64361300  | -2.54417500 | 1.52038800  | F | 5.00334500  | -1.81263700 | -2.24281400 |
| C     | 0.26419100  | -2.96804000 | 3.07620700  | C | 5.10992300  | -1.03525600 | -0.02624300 |
| H     | 0.87308000  | -3.77839600 | 3.46576600  | F | 6.43514600  | -1.17178400 | -0.01736400 |
| C     | -0.91811600 | -2.60822300 | 3.71092500  | C | 4.44706500  | -0.55360800 | 1.09427300  |
| H     | -1.25049300 | -3.11298700 | 4.61203800  | F | 5.14126400  | -0.21562700 | 2.18314500  |
| C     | -1.66515800 | -1.57764000 | 3.16141300  | C | 3.06739800  | -0.42174500 | 1.05591400  |
| H     | -2.59278500 | -1.28246100 | 3.64824100  | F | 2.48815400  | 0.08422800  | 2.15651000  |
| C     | -1.26409600 | -0.91079000 | 1.99496400  | C | 0.63356100  | 1.17209700  | -0.00303700 |
| C     | -2.21538600 | 0.16832700  | 1.53001200  | C | 0.49646100  | 2.02143500  | 1.09372200  |
| H     | -1.66888100 | 1.07935000  | 1.31947200  | F | 0.20815400  | 1.54053200  | 2.31514700  |
| H     | -2.93178200 | 0.38273600  | 2.32209400  | C | 0.59213700  | 3.40852000  | 1.02019200  |
| N     | -3.04580300 | -0.07688800 | 0.26991100  | F | 0.40170100  | 4.16008100  | 2.10622300  |
| C     | -3.96386900 | -1.33688700 | 0.28030800  | C | 0.88984800  | 4.01169600  | -0.19073000 |
| C     | -4.71046500 | -1.39955500 | -1.06427100 | F | 0.98625000  | 5.33629000  | -0.28150500 |
| H     | -3.98212200 | -1.66969500 | -1.84014700 | C | 1.10342900  | 3.21183400  | -1.30446300 |
| H     | -5.41383600 | -2.23493500 | -0.98666500 | F | 1.43051700  | 3.77156000  | -2.46935400 |
| C     | -5.42497600 | -0.12461500 | -1.47647100 | C | 1.00318500  | 1.83218600  | -1.17929400 |
| H     | -6.24528300 | 0.11290700  | -0.78974200 | F | 1.30586000  | 1.12609300  | -2.27837000 |
| H     | -5.87918300 | -0.26161000 | -2.46180400 | H | -2.35408200 | -0.29360900 | -0.47063300 |
| C     | -4.41221700 | 1.00683900  | -1.52915900 | C | -0.13339500 | -1.19359200 | -1.23374800 |
| H     | -4.88312000 | 1.94867200  | -1.82819300 | C | -0.04119700 | -2.59421800 | -1.36007100 |
| H     | -3.64831500 | 0.77651400  | -2.28468700 | C | -0.94076200 | -0.55256100 | -2.18266800 |
| C     | -3.70841700 | 1.26081000  | -0.19030700 | C | -0.70831700 | -3.30353100 | -2.34940600 |
| C     | -2.61776100 | 2.31784100  | -0.42097300 | H | 0.58223800  | -3.14070300 | -0.65500500 |
| H     | -1.74028200 | 1.91361300  | -0.92840000 | C | -1.63693000 | -1.25391900 | -3.17627400 |
| H     | -2.29122700 | 2.79910400  | 0.50311100  | H | -0.99047700 | 0.53410100  | -2.20158500 |
| H     | -3.04507300 | 3.09613400  | -1.05840600 | C | -1.53103400 | -2.63553800 | -3.25981400 |
| C     | -4.68786000 | 1.81936600  | 0.84547400  | H | -0.59402100 | -4.38188200 | -2.41252300 |
|       |             |             |             | H | -2.23828000 | -0.70869700 | -3.90043600 |



|        |             |             |             |       |             |             |             |
|--------|-------------|-------------|-------------|-------|-------------|-------------|-------------|
| H      | -2.05808000 | -3.18421200 | -4.03407800 | H     | -2.53190900 | 1.97612900  | 3.83038500  |
|        |             |             |             | C     | -3.89963000 | -0.14261400 | 2.67276700  |
| N20_TS |             |             |             | H     | -3.28037400 | -1.04672900 | 2.67248700  |
| B      | 0.81667900  | 0.07296100  | -0.09012100 | H     | -4.84209400 | -0.36650700 | 2.17220500  |
| C      | -0.14525300 | 0.19162200  | -1.39867900 | H     | -4.11559700 | 0.11851600  | 3.71258400  |
| C      | 0.30869500  | -0.28459300 | -2.63871200 | C     | 1.93102500  | -1.13869000 | -0.09851400 |
| H      | 1.22992500  | -0.85659100 | -2.67809400 | C     | 3.15428700  | -1.02906800 | 0.56183000  |
| C      | -0.35795900 | -0.02129400 | -3.83173100 | F     | 3.49489100  | 0.11346000  | 1.17951800  |
| H      | 0.04202100  | -0.40024900 | -4.76739000 | C     | 4.07895600  | -2.06155500 | 0.66062400  |
| C      | -1.53614700 | 0.71666800  | -3.82091300 | F     | 5.23275900  | -1.87782000 | 1.30249700  |
| H      | -2.07267100 | 0.92140500  | -4.74177900 | C     | 3.79147700  | -3.29458500 | 0.09651200  |
| C      | -2.01929400 | 1.19144000  | -2.60651900 | F     | 4.66248600  | -4.29757100 | 0.18185000  |
| H      | -2.94479300 | 1.76312800  | -2.57884900 | C     | 2.57116400  | -3.47222000 | -0.53672400 |
| C      | -1.33058600 | 0.96031800  | -1.41353200 | F     | 2.25435800  | -4.65953800 | -1.05520200 |
| C      | -1.90762200 | 1.56505900  | -0.15184700 | C     | 1.68049800  | -2.40949400 | -0.60805500 |
| H      | -2.63238800 | 2.33985700  | -0.41773000 | F     | 0.48217100  | -2.69640100 | -1.15616900 |
| H      | -1.13333200 | 2.02978100  | 0.45461500  | C     | 1.59916800  | 1.55287000  | -0.11674100 |
| N      | -2.56238500 | 0.50971900  | 0.69078100  | C     | 1.35065000  | 2.75934200  | 0.53011700  |
| C      | -3.11958300 | 1.01243000  | 2.02888700  | F     | 0.39502000  | 2.87988900  | 1.48812800  |
| C      | -4.00164000 | 2.24690300  | 1.79370600  | C     | 2.02144900  | 3.95549600  | 0.28789700  |
| H      | -4.58273400 | 2.40532300  | 2.70776700  | F     | 1.69909200  | 5.05277100  | 0.97435900  |
| H      | -3.35242200 | 3.12288200  | 1.69056300  | C     | 3.01452700  | 4.00271600  | -0.67017700 |
| C      | -4.92853200 | 2.12578600  | 0.57756800  | F     | 3.66631200  | 5.13360600  | -0.92506200 |
| C      | -4.87167200 | 0.77962500  | -0.10533300 | C     | 3.30869900  | 2.83913600  | -1.36493600 |
| C      | -6.02013000 | 0.34132000  | -0.75552600 | F     | 4.25592100  | 2.84776100  | -2.30050300 |
| C      | -6.04558400 | -0.88713100 | -1.39849900 | C     | 2.60882600  | 1.67574700  | -1.08521600 |
| H      | -6.94516400 | -1.23294100 | -1.89703500 | F     | 2.96940100  | 0.61884900  | -1.82982000 |
| C      | -4.90108000 | -1.66328200 | -1.39438500 | H     | -6.90238300 | 0.97553400  | -0.74370300 |
| H      | -4.90889700 | -2.62096500 | -1.90414500 | H     | -5.96584300 | 2.31951500  | 0.86309700  |
| C      | -3.71865200 | -1.25763800 | -0.75998200 | H     | -4.67832300 | 2.90130800  | -0.15690200 |
| C      | -3.71560100 | -0.03010700 | -0.08202800 | H     | -1.22643700 | -0.06522500 | 1.05005000  |
| C      | -2.53259000 | -2.19148300 | -0.86948600 | C     | 0.01716100  | -0.41305400 | 1.46919300  |
| H      | -1.64484300 | -1.63109700 | -0.58085100 | C     | 0.69303500  | 0.19522000  | 2.56412100  |
| C      | -2.30057100 | -2.64473500 | -2.31620200 | C     | -0.26399300 | -1.79775400 | 1.65384100  |
| H      | -1.34394000 | -3.16441600 | -2.39427200 | C     | 1.06694200  | -0.50462200 | 3.70174900  |
| H      | -2.28083900 | -1.78620100 | -2.99089500 | H     | 0.96625900  | 1.23876700  | 2.51373600  |
| H      | -3.08006900 | -3.33588400 | -2.65224300 | C     | 0.03425900  | -2.49395000 | 2.81301400  |
| C      | -2.71246200 | -3.40522200 | 0.04976900  | H     | -0.71514700 | -2.34600900 | 0.83984300  |
| H      | -1.83770400 | -4.06275000 | -0.01015400 | C     | 0.72132100  | -1.84742900 | 3.84002900  |
| H      | -3.58912700 | -3.98568200 | -0.25591800 | H     | 1.62124700  | -0.00125800 | 4.48682200  |
| H      | -2.85765800 | -3.10924100 | 1.09422500  | H     | -0.23166600 | -3.54245700 | 2.90105300  |
| C      | -2.03718900 | 1.41924500  | 3.02856900  | H     | 0.99527700  | -2.39110400 | 4.73943900  |
| H      | -1.27707000 | 2.07111500  | 2.59973200  |       |             |             |             |
| H      | -1.55792200 | 0.55164600  | 3.48137800  | N20_P |             |             |             |

|   |             |             |             |        |             |             |             |
|---|-------------|-------------|-------------|--------|-------------|-------------|-------------|
| B | 1.10387700  | 0.06564300  | 0.07270200  | H      | -5.03603900 | -0.34293100 | 2.03121800  |
| C | 0.07987500  | -0.03050400 | -1.23032900 | H      | -4.72658100 | 0.64664400  | 3.46901400  |
| C | 0.58818200  | -0.59156400 | -2.41859600 | C      | 2.19492900  | -1.18466800 | 0.05506700  |
| H | 1.58011300  | -1.03189800 | -2.39949400 | C      | 3.51152300  | -1.06640000 | 0.49449600  |
| C | -0.10375700 | -0.58592900 | -3.62261900 | F      | 4.00341400  | 0.13058800  | 0.85121700  |
| H | 0.34737300  | -1.03192400 | -4.50421700 | C      | 4.39243900  | -2.13469400 | 0.60774600  |
| C | -1.36349600 | 0.00344200  | -3.70354700 | F      | 5.64612600  | -1.94271700 | 1.02122100  |
| H | -1.91025200 | 0.02980900  | -4.64057100 | C      | 3.95979400  | -3.41462000 | 0.29690100  |
| C | -1.89794800 | 0.57665900  | -2.56074900 | F      | 4.78630900  | -4.45452700 | 0.40369900  |
| H | -2.87341700 | 1.05793700  | -2.60671000 | C      | 2.64997400  | -3.59656400 | -0.11692500 |
| C | -1.19983100 | 0.55675200  | -1.34380500 | F      | 2.20429800  | -4.82271400 | -0.40400400 |
| C | -1.85044100 | 1.25414700  | -0.18222800 | C      | 1.80951900  | -2.49568900 | -0.21490200 |
| H | -2.40604000 | 2.12849100  | -0.52473900 | F      | 0.53789700  | -2.77788300 | -0.58519200 |
| H | -1.11137900 | 1.54705100  | 0.55576000  | C      | 1.82295800  | 1.54262100  | -0.17767700 |
| N | -2.88328800 | 0.40991300  | 0.59140600  | C      | 1.39470400  | 2.75413600  | 0.35537300  |
| C | -3.44018100 | 1.15575000  | 1.82752400  | F      | 0.36940300  | 2.81067000  | 1.24285500  |
| C | -4.28022200 | 2.32686600  | 1.32253600  | C      | 1.94358900  | 3.99436400  | 0.04543300  |
| H | -4.68660600 | 2.83466900  | 2.20259500  | F      | 1.46924000  | 5.10498700  | 0.61672500  |
| H | -3.62456100 | 3.05423300  | 0.83595900  | C      | 2.97849900  | 4.07012500  | -0.86889800 |
| C | -5.41031200 | 1.89973900  | 0.39327100  | F      | 3.52064500  | 5.24424100  | -1.18707000 |
| C | -5.09464500 | 0.69688600  | -0.46865400 | C      | 3.43694700  | 2.89826400  | -1.45395500 |
| C | -6.05270100 | 0.29577500  | -1.40173500 | F      | 4.42660400  | 2.94927300  | -2.34590600 |
| C | -5.89376900 | -0.87613700 | -2.12134300 | C      | 2.85374600  | 1.68804700  | -1.10970300 |
| H | -6.64043400 | -1.17714800 | -2.84883500 | F      | 3.35121000  | 0.61227800  | -1.73905300 |
| C | -4.78395800 | -1.67999200 | -1.89017700 | H      | -6.93593800 | 0.91357800  | -1.53927400 |
| H | -4.67557600 | -2.60781900 | -2.43911100 | H      | -6.29261100 | 1.63388000  | 0.98850800  |
| C | -3.79196700 | -1.32042400 | -0.97819400 | H      | -5.71637600 | 2.73743700  | -0.24056400 |
| C | -3.95955400 | -0.09988600 | -0.29768500 | H      | -2.34422600 | -0.38377600 | 0.97171200  |
| C | -2.63654100 | -2.26978500 | -0.70830000 | C      | 0.50759700  | -0.14335000 | 1.58952100  |
| H | -1.73521800 | -1.67729000 | -0.54452200 | C      | 1.03253900  | 0.53150200  | 2.70432000  |
| C | -2.30251700 | -3.18620300 | -1.88666500 | C      | -0.36935300 | -1.20566500 | 1.87986900  |
| H | -1.35696000 | -3.69267300 | -1.68394700 | C      | 0.67604700  | 0.20034800  | 4.01043000  |
| H | -2.18515100 | -2.60821900 | -2.80716500 | H      | 1.76297100  | 1.32033400  | 2.54886400  |
| H | -3.06865400 | -3.95383900 | -2.03891400 | C      | -0.74189500 | -1.54654500 | 3.18231000  |
| C | -2.93215500 | -3.09860800 | 0.55060700  | H      | -0.69624900 | -1.84860200 | 1.06844400  |
| H | -2.08095900 | -3.74615300 | 0.78341400  | C      | -0.22655300 | -0.83263600 | 4.26059000  |
| H | -3.81458500 | -3.72667200 | 0.39167700  | H      | 1.11433800  | 0.74702600  | 4.84056500  |
| H | -3.12974200 | -2.46977700 | 1.42779200  | H      | -1.40704000 | -2.39099600 | 3.35109800  |
| C | -2.30138700 | 1.68074600  | 2.69714200  | H      | -0.50017600 | -1.0188300  | 5.27850600  |
| H | -1.75348400 | 2.50064800  | 2.23055000  |        |             |             |             |
| H | -1.59842700 | 0.89362400  | 2.97040100  | N21_TS |             |             |             |
| H | -2.74969700 | 2.06274400  | 3.61864300  | B      | -0.73195200 | -0.28195800 | 0.26542300  |
| C | -4.25493000 | 0.13717500  | 2.62496400  | C      | -0.02794700 | 0.76325700  | 1.66283700  |
| H | -3.58957700 | -0.63278800 | 3.03106700  | C      | -0.60572700 | -1.83721100 | 2.35716900  |

|   |             |             |             |       |             |             |             |
|---|-------------|-------------|-------------|-------|-------------|-------------|-------------|
| H | -1.51625200 | -2.28293400 | 1.96747800  | C     | -1.47643400 | 1.81382100  | -1.16754300 |
| C | -0.06697800 | -2.3789700  | 3.52181100  | F     | -1.74270500 | 0.97446900  | -2.18131500 |
| H | -0.56562600 | -3.20901100 | 4.01226800  | C     | -2.23119200 | -0.91655600 | 0.04862100  |
| C | 1.10190600  | -1.84840900 | 4.04783900  | C     | -3.17535700 | -0.57303200 | 1.02160200  |
| H | 1.53693300  | 2.24925200  | 4.95769700  | F     | -2.79733700 | 0.17289700  | 2.07095800  |
| C | 1.71780900  | 0.79688700  | 3.37836800  | C     | -4.50871500 | -0.95033300 | 0.98414300  |
| H | 2.64888800  | -0.38999100 | 3.76495700  | F     | -5.34876600 | -0.59398600 | 1.95528200  |
| C | 1.18282400  | -0.25920100 | 2.20571200  | C     | -4.96756500 | -1.70002500 | -0.09016600 |
| C | 1.97575600  | 0.86309900  | 1.56671100  | F     | -6.24330300 | -2.07150100 | -0.15704800 |
| H | 2.89015700  | 1.03855900  | 2.14645500  | C     | -4.08090900 | -2.04646600 | -1.09448300 |
| H | 1.40045200  | 1.78839400  | 1.58639700  | F     | -4.50830900 | -2.75367200 | -2.14108700 |
| N | 2.33185600  | 0.60296900  | 0.14950600  | C     | -2.74848300 | -1.64699500 | -1.01636400 |
| C | 2.36778500  | 1.81516100  | -0.68320500 | F     | -1.99233300 | -2.00975000 | -2.06054400 |
| C | 3.66814400  | 2.57984600  | -0.49721700 | H     | 1.11504500  | -0.26934800 | -0.39940200 |
| H | 3.81587400  | 2.79826500  | 0.56909100  | H     | 1.48869400  | 2.41642600  | -0.43899300 |
| H | 3.62756300  | 3.54091400  | -1.01929800 | H     | 2.27848900  | 1.49646800  | -1.72997500 |
| C | 4.83159700  | 1.74213600  | -1.02622700 | C     | 0.47017700  | -0.52825700 | -2.38366400 |
| H | 4.77834900  | 1.76469600  | -2.12496400 | C     | 0.64783300  | -1.39955300 | -3.44679000 |
| C | 4.68796400  | 0.29008500  | -0.58975200 | C     | 0.76822000  | -2.76653900 | -3.20177600 |
| C | 5.75348400  | -0.59979200 | -0.75214000 | C     | 0.73429800  | -3.25809300 | -1.89715000 |
| H | 6.67109100  | -0.24329500 | -1.21035400 | C     | 0.56734900  | -2.37948900 | -0.83957600 |
| C | 5.68202800  | -1.92230300 | -0.33600300 | C     | 0.39907500  | -0.98816200 | -1.04715600 |
| H | 6.53460400  | -2.58066700 | -0.47775900 | H     | 0.40914900  | 0.53581900  | -2.58135700 |
| C | 4.52497200  | -2.40847100 | 0.27161000  | H     | 0.69696300  | -1.02114100 | -4.46213600 |
| C | 3.44921800  | -1.53924400 | 0.42419600  | H     | 0.89988500  | -3.45325600 | -4.03280700 |
| H | 2.54077500  | -1.89815600 | 0.89365300  | H     | 0.83858300  | -4.32232600 | -1.71336700 |
| C | 3.50948000  | -0.21286800 | -0.01075700 | H     | 0.53366200  | -2.76593900 | 0.17545600  |
| C | 6.16609300  | 2.36057000  | -0.60167500 |       |             |             |             |
| H | 6.18995600  | 3.41979600  | -0.87476200 | N21_P |             |             |             |
| H | 7.02156800  | 1.87843900  | -1.07853300 | B     | 0.92159800  | -0.26066800 | 0.07366500  |
| H | 6.29323600  | 2.28254500  | 0.48245800  | C     | -0.10656300 | -0.78372700 | -1.11527900 |
| C | 4.40242000  | -3.84185800 | 0.71802300  | C     | 0.19079700  | -1.91696200 | -1.88859300 |
| H | 3.88228300  | -3.90985800 | 1.67735200  | H     | 1.12786400  | -2.43784800 | -1.71805600 |
| H | 5.38262100  | -4.31218400 | 0.82266700  | C     | -0.65867100 | -2.41116900 | -2.87627200 |
| H | 3.82690100  | -4.42418300 | -0.00964500 | H     | -0.36791800 | -3.29059800 | -3.44354300 |
| C | -0.97196600 | 1.32455300  | 0.04187000  | C     | -1.85717100 | -1.76505500 | -3.15693700 |
| C | -0.93892300 | 2.28041200  | 1.05982100  | H     | -2.51195900 | -2.11680500 | -3.94760500 |
| F | -0.61920000 | 1.94920900  | 2.31670500  | C     | -2.20034400 | -0.65326800 | -2.39856900 |
| C | -1.23006700 | 3.62742500  | 0.86647000  | H     | -3.14446000 | -0.14374600 | -2.58469400 |
| F | -1.14257100 | 4.48783700  | 1.87945300  | C     | -1.36568200 | -0.19691400 | -1.37446700 |
| C | -1.63904200 | 4.07039200  | -0.38146300 | C     | -1.88069000 | 0.94704300  | -0.54870700 |
| F | -1.92571600 | 5.35242800  | -0.58183500 | H     | -2.52932600 | 1.59762400  | -1.13697600 |
| C | -1.77462500 | 3.14863100  | -1.40859700 | H     | -1.07997000 | 1.52992200  | -0.09040200 |
| F | -2.22088000 | 3.54031700  | -2.60132300 | N     | -2.73053600 | 0.47108500  | 0.64566300  |

|   |             |             |             |       |             |             |             |
|---|-------------|-------------|-------------|-------|-------------|-------------|-------------|
| C | -3.11541000 | 1.61311000  | 1.53932600  | F     | 2.32587100  | -1.97044000 | 2.21882800  |
| C | -4.12949700 | 2.50280300  | 0.84824000  | H     | -2.09578400 | -0.14041200 | 1.18551700  |
| H | -3.68236600 | 2.95489500  | -0.04336700 | H     | -2.19408500 | 2.13943300  | 1.79210300  |
| H | -4.37142100 | 3.33453500  | 1.51589400  | H     | -3.51831900 | 1.16289000  | 2.45071000  |
| C | -5.41252500 | 1.74842300  | 0.47299500  | C     | -0.11827900 | 0.46951200  | 2.46886500  |
| H | -6.07177400 | 1.75024000  | 1.35177200  | C     | -0.93061700 | 0.22747300  | 3.58174900  |
| C | -5.15379900 | 0.28699100  | 0.14066200  | C     | -1.55377500 | -1.00587900 | 3.74328000  |
| C | -6.21037900 | -0.53946100 | -0.25345500 | C     | -1.32792300 | -2.00555700 | 2.79401800  |
| H | -7.20625800 | -0.11475000 | -0.33786400 | C     | -0.50926300 | -1.75116900 | 1.69716000  |
| C | -6.02238500 | -1.88678500 | -0.53211100 | C     | 0.11291800  | -0.50334800 | 1.48549500  |
| H | -6.86837100 | -2.49071500 | -0.84744300 | H     | 0.33632900  | 1.45179500  | 2.36619300  |
| C | -4.76391300 | -2.47946800 | -0.41038700 | H     | -1.07988200 | 1.01107800  | 4.32018900  |
| C | -3.70511900 | -1.67784200 | 0.00739800  | H     | -2.19130300 | -1.19561000 | 4.60110600  |
| H | -2.70656400 | -2.09649900 | 0.10225400  | H     | -1.79285200 | -2.98059600 | 2.91082600  |
| C | -3.90620400 | -0.32644300 | 0.26312200  | H     | -0.35106100 | -2.53899200 | 0.96170300  |
| C | -6.13078000 | 2.48050400  | -0.66551600 |       |             |             |             |
| H | -6.28984600 | 3.52935400  | -0.39896400 | P1_TS |             |             |             |
| H | -7.10475300 | 2.04072500  | -0.88802700 | P     | -1.30458300 | 0.22853100  | -0.15310900 |
| H | -5.52694700 | 2.44571400  | -1.57785100 | C     | -0.92086400 | -0.06724600 | 1.59118300  |
| C | -4.52428700 | -3.92924100 | -0.73512300 | C     | 0.41175200  | -0.44595400 | 1.83633300  |
| H | -3.75199200 | -4.02106300 | -1.50484900 | B     | 1.49754300  | -0.52851500 | 0.65053700  |
| H | -5.43409500 | -4.41024800 | -1.09911800 | C     | -1.87217400 | 0.01564500  | 2.61189000  |
| H | -4.17745400 | -4.47688900 | 0.14607400  | C     | -1.49377900 | -0.27256200 | 3.91702200  |
| C | 1.41890900  | 1.31761200  | -0.07529400 | C     | -0.17662500 | -0.64700300 | 4.18787300  |
| C | 1.15806700  | 2.19786700  | -1.12228400 | C     | 0.75973000  | -0.73163300 | 3.16200100  |
| F | 0.32223100  | 1.86310500  | -2.12058300 | O     | 2.83296500  | -0.92229300 | 1.09245600  |
| C | 1.69996300  | 3.47683700  | -1.21598900 | O     | 1.66170800  | 0.74994100  | -0.07755900 |
| F | 1.38363200  | 4.27335000  | -2.23960900 | C     | 3.00053000  | 0.89955100  | -0.25027100 |
| C | 2.57388100  | 3.92411600  | -0.23962200 | C     | 3.66282100  | 1.86709900  | -0.97874700 |
| F | 3.10138000  | 5.14497400  | -0.30946000 | C     | 5.06500100  | 1.80734200  | -1.00878700 |
| C | 2.88620800  | 3.08324900  | 0.81944000  | C     | 5.75509800  | 0.80983700  | -0.32989600 |
| F | 3.72771500  | 3.49515100  | 1.76869300  | C     | 5.07505400  | -0.17091700 | 0.40853000  |
| C | 2.31825700  | 1.81791700  | 0.87035100  | C     | 3.69594800  | -0.10689100 | 0.43918200  |
| F | 2.67794000  | 1.05502200  | 1.91519600  | H     | 3.10831000  | 2.63924800  | -1.50097100 |
| C | 2.34077500  | -1.09692800 | 0.00487200  | H     | 5.61559600  | 2.55327600  | -1.57269500 |
| C | 3.11262500  | -1.00316400 | -1.15385000 | H     | 6.83917900  | 0.78471600  | -0.37089600 |
| F | 2.65259400  | -0.29544800 | -2.19863800 | H     | 5.60116300  | -0.95500300 | 0.94134100  |
| C | 4.35056200  | -1.60806100 | -1.31685500 | C     | -1.30411700 | 2.01304800  | -0.47238100 |
| F | 5.03135600  | -1.48652900 | -2.45844000 | C     | -2.98496300 | -0.38931400 | -0.45853400 |
| C | 4.88415500  | -2.34344900 | -0.26755600 | C     | -4.12804300 | 0.39141400  | -0.25502700 |
| F | 6.07103700  | -2.93554900 | -0.39465400 | C     | -5.39007900 | -0.16238400 | -0.44660600 |
| C | 4.16818000  | -2.45329500 | 0.91282600  | C     | -5.51745000 | -1.49280400 | -0.84001500 |
| F | 4.67590000  | -3.14888500 | 1.93263800  | C     | -4.38236700 | -2.27212600 | -1.04646400 |
| C | 2.92855200  | -1.82967900 | 1.03052000  | C     | -3.11739300 | -1.72311100 | -0.86037000 |

|      |             |             |             |   |             |             |             |
|------|-------------|-------------|-------------|---|-------------|-------------|-------------|
| H    | -4.02930700 | 1.43093300  | 0.04586100  | C | 4.36835900  | -1.06249500 | -1.35269900 |
| H    | -6.27503100 | 0.44511200  | -0.28661700 | C | 5.72976700  | -0.71129500 | -1.34853500 |
| H    | -6.50333200 | -1.92163300 | -0.98824300 | C | 6.19861000  | 0.31345900  | -0.53884200 |
| H    | -4.48039300 | -3.30659600 | -1.35864700 | C | 5.32760400  | 1.02996900  | 0.29967400  |
| H    | -2.22945500 | -2.32951700 | -1.02619600 | C | 3.99113900  | 0.68212300  | 0.29258400  |
| C    | -1.97569400 | 2.52646200  | -1.58777500 | H | 3.98890700  | -1.86430200 | -1.97767500 |
| C    | -1.91794800 | 3.88744100  | -1.86701100 | H | 6.41984800  | -1.25322500 | -1.98747400 |
| C    | -1.18199200 | 4.73781800  | -1.04482500 | H | 7.25370900  | 0.56829800  | -0.54944000 |
| C    | -0.50179300 | 4.22539900  | 0.05673500  | H | 5.68087700  | 1.83070500  | 0.94028000  |
| C    | -0.55848200 | 2.86598200  | 0.34675000  | C | -1.13666700 | -1.47253600 | -0.69553700 |
| H    | -2.54936900 | 1.86567500  | -2.23230000 | C | -3.35008600 | 0.32588400  | -0.16404100 |
| H    | -2.44461300 | 4.28289100  | -2.72950500 | C | -3.95203000 | -0.08945300 | -1.35464300 |
| H    | -1.13660400 | 5.79944900  | -1.26549900 | C | -5.30227400 | 0.16859600  | -1.56846700 |
| H    | 0.07863900  | 4.88419100  | 0.6941440   | C | -6.04810200 | 0.83428900  | -0.59827500 |
| H    | -0.01629600 | 2.46082600  | 1.19501800  | C | -5.44927400 | 1.24391900  | 0.59094400  |
| H    | -2.89866500 | 0.29254400  | 2.38448800  | C | -4.09953500 | 0.99048300  | 0.81102000  |
| H    | -2.22118200 | -0.20983600 | 4.72015100  | H | -3.36843300 | -0.61541200 | -2.10520900 |
| H    | 0.11638900  | -0.87624900 | 5.20833200  | H | -5.77278100 | -0.15355600 | -2.49136900 |
| H    | 1.78501800  | -1.02170300 | 3.37366700  | H | -7.10164100 | 1.03095300  | -0.76815800 |
| H    | -0.05888800 | -0.78822600 | -0.61965000 | H | -6.03259900 | 1.75674300  | 1.34811700  |
| C    | 0.52181600  | -2.97636100 | -0.11017400 | H | -3.63003400 | 1.30568200  | 1.73989900  |
| C    | 0.68459100  | -4.12543900 | -0.87129200 | C | -1.75670200 | -2.66143800 | -0.28920100 |
| C    | 1.32670300  | -4.04929100 | -2.10942700 | C | -1.41957700 | -3.85320300 | -0.91226900 |
| C    | 1.80033200  | -2.82602700 | -2.58023600 | C | -0.46799300 | -3.85748700 | -1.93512200 |
| C    | 1.62874900  | -1.67814000 | -1.81481200 | C | 0.14344200  | -2.67550100 | -2.33372700 |
| C    | 0.99090200  | -1.72331700 | -0.55902700 | C | -0.18788300 | -1.47084800 | -1.71511900 |
| H    | 0.02649900  | -3.03575600 | 0.85835900  | H | -2.48330300 | -2.65317400 | 0.51971100  |
| H    | 0.32247000  | -5.08183200 | -0.50624600 | H | -1.88873800 | -4.77970300 | -0.59882100 |
| H    | 1.45697300  | -4.94702800 | -2.70654600 | H | -0.19935200 | -4.79306900 | -2.41518400 |
| H    | 2.29943100  | -2.77181200 | -3.54286900 | H | 0.89397600  | -2.68379400 | -3.11667900 |
| H    | 1.98552500  | -0.71934000 | -2.18464600 | H | 0.32157800  | -0.55392500 | -1.98951100 |
|      |             |             |             | H | -2.43123000 | 2.32695100  | -1.32559300 |
| P1_P |             |             |             | H | -1.27810100 | 4.31434700  | -2.20645400 |
| P    | -1.58669100 | 0.05587900  | 0.13596000  | H | 1.15953200  | 4.60321700  | -1.79474900 |
| C    | -0.63869500 | 1.48671800  | -0.42923300 | H | 2.40724200  | 2.90595200  | -0.50316200 |
| C    | 0.74696600  | 1.60871100  | -0.17937800 | H | -1.53545800 | -0.13966100 | 1.52023100  |
| B    | 1.73514500  | 0.52733200  | 0.60890100  | C | 0.42298500  | 0.69082000  | 2.87645700  |
| C    | -1.36648000 | 2.44687400  | -1.15372400 | C | -0.39278300 | 0.17295500  | 3.87828300  |
| C    | -0.71981500 | 3.56872200  | -1.65031900 | C | -0.68545500 | -1.19409100 | 3.89795300  |
| C    | 0.64397400  | 3.72510600  | -1.41628800 | C | -0.11978200 | -2.03228200 | 2.93949200  |
| C    | 1.34795200  | 2.76642200  | -0.69572100 | C | 0.70470500  | -1.49957400 | 1.94637900  |
| O    | 2.98640700  | 1.23568200  | 1.00482300  | C | 0.96554200  | -0.12678800 | 1.87165800  |
| O    | 2.18328400  | -0.52485200 | -0.36683200 | H | 0.62336500  | 1.76063900  | 2.84809200  |
| C    | 3.51634500  | -0.35718600 | -0.52712400 | H | -0.80925700 | 0.82706900  | 4.63951700  |

|       |             |             |             |      |             |             |             |
|-------|-------------|-------------|-------------|------|-------------|-------------|-------------|
| H     | -1.33556500 | -1.60167300 | 4.66665800  | H    | 2.60476400  | 2.90311100  | -1.58558700 |
| H     | -0.32693600 | -3.09909100 | 2.96209000  | H    | 2.83064900  | 2.88352600  | 0.16846800  |
| H     | 1.12597600  | -2.14668800 | 1.17996700  | C    | 3.35656900  | 0.41008100  | -2.18275500 |
| P2_TS |             |             |             | H    | 3.31902900  | -0.68176000 | -2.20211300 |
| C     | -1.45578000 | 0.23046500  | 2.71948400  | H    | 2.63462200  | 0.80167500  | -2.90601500 |
| C     | -0.66643800 | 0.06213700  | 1.57813100  | H    | 4.35797600  | 0.72937300  | -2.48838700 |
| C     | 0.66366300  | -0.39149100 | 1.63617300  | C    | 3.76381900  | 0.17128600  | 0.33547000  |
| C     | 1.17195600  | -0.67982200 | 2.90994700  | C    | 5.16197800  | -0.29742500 | -0.04676000 |
| C     | 0.40244900  | -0.50965800 | 4.05664900  | H    | 5.79818400  | 0.55032900  | -0.32335600 |
| C     | -0.91211600 | -0.04805000 | 3.96665300  | H    | 5.62043400  | -0.80500800 | 0.80632900  |
| H     | -2.48726400 | 0.56294500  | 2.63070400  | H    | 5.12604700  | -1.00218700 | -0.87873400 |
| H     | 2.19203400  | -1.04784800 | 2.98178100  | C    | 3.83867200  | 0.98754300  | 1.63055100  |
| H     | 0.82326900  | -0.74205000 | 5.03099600  | H    | 2.85297300  | 1.36856300  | 1.91401200  |
| H     | -1.50988800 | 0.08132400  | 4.86344100  | H    | 4.19684100  | 0.33843900  | 2.43459500  |
| B     | 1.58112000  | -0.56932000 | 0.29419600  | H    | 4.52901600  | 1.83144200  | 1.53518800  |
| P     | -1.28900500 | 0.26546300  | -0.10843100 | H    | -0.16246900 | -0.85511400 | -0.64470800 |
| C     | -3.00218900 | -0.33844700 | -0.14462000 | C    | 0.79261400  | -1.87589400 | -0.67299400 |
| C     | -4.10281300 | 0.44987400  | 0.21061600  | C    | 0.99097500  | -2.01268800 | -2.06008100 |
| C     | -3.19476200 | -1.67641900 | -0.50637600 | C    | 0.90526700  | -3.24643800 | -2.69344800 |
| C     | -5.38108200 | -0.09927100 | 0.20600200  | C    | 0.61113100  | -4.38636200 | -1.94550700 |
| H     | -3.95746700 | 1.49271000  | 0.48029100  | C    | 0.39331400  | -4.28379000 | -0.57152000 |
| C     | -4.47513400 | -2.22150000 | -0.50441100 | C    | 0.47326300  | -3.04296000 | 0.05036700  |
| H     | -2.34077800 | -2.28966100 | -0.78661300 | H    | 1.18090400  | -1.11446900 | -2.64252200 |
| C     | -5.56688200 | -1.43355400 | -0.14998300 | H    | 1.05781900  | -3.32496300 | -3.76569200 |
| H     | -6.23300800 | 0.51407900  | 0.48108000  | H    | 0.54399600  | -5.35397800 | -2.43414900 |
| H     | -4.62032900 | -3.25941800 | -0.78534000 | H    | 0.16405800  | -5.17274700 | 0.00845100  |
| H     | -6.56569000 | -1.85826700 | -0.15322400 | H    | 0.30354000  | -2.96741100 | 1.12269400  |
| C     | -1.30721500 | 2.02378300  | -0.55473800 | P2_P |             |             |             |
| C     | -2.18527900 | 2.49925200  | -1.53476200 | C    | -1.17179100 | 0.52116600  | 2.65651500  |
| C     | -0.37094900 | 2.88781000  | 0.02167000  | C    | -0.44630700 | 0.15642800  | 1.51293000  |
| C     | -2.13856600 | 3.83511400  | -1.92011700 | C    | 0.79303200  | -0.49765300 | 1.56055300  |
| H     | -2.90724800 | 1.82836500  | -1.99227100 | C    | 1.28183900  | -0.78265900 | 2.84441000  |
| C     | -0.32579900 | 4.21994600  | -0.37505200 | C    | 0.58437300  | -0.42840000 | 3.99339900  |
| H     | 0.32758800  | 2.50243900  | 0.75744700  | C    | -0.64574800 | 0.23006100  | 3.90565500  |
| C     | -1.20949900 | 4.69598000  | -1.34120700 | H    | -2.13655400 | 1.01758800  | 2.57389900  |
| H     | -2.82592800 | 4.20202800  | -2.67543500 | H    | 2.24200000  | -1.28786100 | 2.91288400  |
| H     | 0.40439800  | 4.88771400  | 0.07110700  | H    | 0.99465500  | -0.66400400 | 4.97140300  |
| H     | -1.17255800 | 5.73728100  | -1.64512300 | H    | -1.18953500 | 0.50466100  | 4.80331800  |
| O     | 2.94006100  | -0.97068100 | 0.54797800  | B    | 1.61034300  | -0.93682100 | 0.19527600  |
| O     | 1.63597100  | 0.64964100  | -0.50130800 | P    | -1.16744700 | 0.52648000  | -0.08870100 |
| C     | 3.00113800  | 0.94236100  | -0.79298500 | C    | -2.86237400 | -0.08373100 | -0.15105000 |
| C     | 3.18416400  | 2.45577900  | -0.77224600 | C    | -3.96028500 | 0.66460500  | 0.28344100  |
| H     | 4.23689600  | 2.72666000  | -0.90810600 | C    | -3.02519400 | -1.40856400 | -0.57455600 |

|   |             |             |             |       |             |             |             |
|---|-------------|-------------|-------------|-------|-------------|-------------|-------------|
| C | -5.22608500 | 0.08754200  | 0.28461500  | C     | -0.47255400 | -4.28197400 | -0.23674800 |
| H | -3.82867500 | 1.69329700  | 0.60880400  | C     | 0.27369700  | -3.23973300 | 0.31115000  |
| C | -4.29547200 | -1.97551800 | -0.56606000 | H     | 0.88638000  | -1.45855300 | -2.48790400 |
| H | -2.16746200 | -1.99509800 | -0.90203700 | H     | -0.42620100 | -3.30234000 | -3.48424100 |
| C | -5.39175800 | -1.22963700 | -0.13965400 | H     | -1.31566800 | -5.11908100 | -2.03799400 |
| H | -6.08223500 | 0.66504400  | 0.61667700  | H     | -0.85899600 | -5.06939900 | 0.40460900  |
| H | -4.42301200 | -3.00170300 | -0.89373000 | H     | 0.44543100  | -3.22395300 | 1.38593000  |
| H | -6.38099400 | -1.67576500 | -0.13665900 |       |             |             |             |
| C | -1.10202900 | 2.29077200  | -0.45365900 | P3_TS |             |             |             |
| C | -2.04386900 | 2.90187300  | -1.28679600 | C     | 1.51058200  | -0.42621100 | -0.22666500 |
| C | -0.02440400 | 3.01929600  | 0.05739400  | C     | 0.15706100  | -0.39497200 | -0.29630500 |
| C | -1.91153700 | 4.25201500  | -1.59455300 | C     | 2.37799900  | -1.04689600 | -1.27442100 |
| H | -2.87286400 | 2.32895000  | -1.69191500 | C     | 3.07911700  | -2.24129800 | -1.07619800 |
| C | 0.10211900  | 4.36691300  | -0.26147000 | C     | 2.54226400  | -0.35667300 | -2.48110400 |
| H | 0.71208000  | 2.51891000  | 0.67953100  | C     | 3.92909400  | -2.72831700 | -2.06593000 |
| C | -0.84138500 | 4.98182300  | -1.08141700 | H     | 2.95337300  | -2.79595800 | -0.15372500 |
| H | -2.64113200 | 4.73218400  | -2.23776800 | C     | 3.39551500  | -0.84325900 | -3.46599900 |
| H | 0.94065700  | 4.93456900  | 0.12762500  | H     | 1.99156100  | 0.56805400  | -2.63489400 |
| H | -0.74070000 | 6.03436600  | -1.32567900 | C     | 4.09569500  | -2.02923000 | -3.25826400 |
| O | 3.01371900  | -1.23995600 | 0.46892000  | H     | 4.46007300  | -3.66083200 | -1.90292500 |
| O | 1.63618500  | 0.26112300  | -0.70807200 | H     | 3.51379200  | -0.29538700 | -4.39533600 |
| C | 2.98931900  | 0.51068500  | -1.06786000 | H     | 4.76251100  | -2.41069400 | -4.02476900 |
| C | 3.18582800  | 2.00944000  | -1.26609100 | C     | -0.39622800 | -1.25885100 | -1.40270000 |
| H | 4.23217800  | 2.24071700  | -1.49325100 | C     | -0.95713600 | -0.76155500 | -2.57582600 |
| H | 2.56878400  | 2.35351400  | -2.10209300 | C     | -0.26339400 | -2.64929000 | -1.33959000 |
| H | 2.89273200  | 2.57053300  | -0.37599900 | C     | -1.45898500 | -1.58296300 | -3.57736700 |
| C | 3.30285800  | -0.22220000 | -2.37585500 | C     | -0.75959800 | -3.49462500 | -2.32026400 |
| H | 3.21302200  | -1.30290100 | -2.23500400 | C     | -1.37343900 | -2.95927800 | -3.44367400 |
| H | 2.58445300  | 0.09277400  | -3.13933200 | F     | 0.39951600  | -3.22845900 | -0.33409600 |
| H | 4.31019800  | 0.00522400  | -2.73850700 | F     | -0.62388800 | -4.81308100 | -2.20189500 |
| C | 3.78313700  | -0.10097200 | 0.13314700  | F     | -1.84331400 | -3.75743200 | -4.39580400 |
| C | 5.19804000  | -0.55338800 | -0.21169400 | F     | -1.98623200 | -1.05098800 | -4.67697100 |
| H | 5.79741400  | 0.27729600  | -0.60086100 | F     | -0.95219500 | 0.55024600  | -2.82717100 |
| H | 5.68685400  | -0.93562800 | 0.68885400  | B     | -0.92177400 | 0.53059400  | 0.56815900  |
| H | 5.17768900  | -1.35609200 | -0.95038600 | P     | 2.35696900  | 0.41109500  | 1.15632500  |
| C | 3.83935400  | 0.86551200  | 1.32408300  | C     | 3.77756400  | 1.35117200  | 0.49625200  |
| H | 2.84786100  | 1.26739400  | 1.55400000  | C     | 3.82080600  | 2.73432200  | 0.69531200  |
| H | 4.19265500  | 0.31761500  | 2.20224600  | C     | 4.83544000  | 0.71563800  | -0.17054700 |
| H | 4.52291200  | 1.70032800  | 1.13780200  | C     | 4.89685600  | 3.47783800  | 0.21688000  |
| H | -0.50390900 | -0.18116700 | -1.08615800 | H     | 3.01126900  | 3.23159800  | 1.21686900  |
| C | 0.79607800  | -2.20094100 | -0.47499700 | C     | 5.90522700  | 1.46404200  | -0.64685200 |
| C | 0.51735700  | -2.25943400 | -1.84993300 | H     | 4.82246300  | -0.36031600 | -0.31700300 |
| C | -0.23096100 | -3.29274600 | -2.41518900 | C     | 5.93580700  | 2.84470800  | -0.45675300 |
| C | -0.73182200 | -4.31122400 | -1.60649600 | H     | 4.91988600  | 4.55119900  | 0.37287100  |

|   |             |             |             |      |             |             |             |
|---|-------------|-------------|-------------|------|-------------|-------------|-------------|
| H | 6.71677900  | 0.96638500  | -1.16755900 | H    | -0.80635300 | -0.95923700 | 5.09228100  |
| H | 6.77365800  | 3.42495200  | -0.83035200 | H    | -0.07280300 | -1.15858600 | 2.74906700  |
| C | 3.09136900  | -0.94838400 | 2.12901800  | H    | -0.90130500 | 3.02395000  | 2.13613800  |
| C | 2.40938700  | -2.16387500 | 2.27090600  |      |             |             |             |
| C | 4.28157900  | -0.74273200 | 2.83472700  | P3_P |             |             |             |
| C | 2.92081600  | -3.15957000 | 3.09786800  | C    | 1.33229300  | -0.34555400 | -0.36697300 |
| H | 1.49763100  | -2.34547800 | 1.70450600  | C    | -0.02197000 | -0.29333200 | -0.30751100 |
| C | 4.78780700  | -1.74219600 | 3.65964800  | C    | 2.09828600  | -0.60236200 | -1.63457100 |
| H | 4.81827700  | 0.19594000  | 2.73000800  | C    | 2.75549800  | -1.80589300 | -1.90717600 |
| C | 4.10925100  | -2.95050100 | 3.79393700  | C    | 2.18910500  | 0.44802300  | -2.55613900 |
| H | 2.39232300  | -4.10282700 | 3.19135500  | C    | 3.49202800  | -1.95122300 | -3.08161500 |
| H | 5.71653800  | -1.57589500 | 4.19584500  | H    | 2.67885000  | -2.63436000 | -1.21227300 |
| H | 4.50714200  | -3.72895500 | 4.43673500  | C    | 2.92586600  | 0.30107900  | -3.72537700 |
| C | -2.34910800 | -0.19704500 | 0.92342000  | H    | 1.66907300  | 1.37851300  | -2.34165700 |
| C | -2.47136900 | -1.55929900 | 1.17396700  | C    | 3.58522100  | -0.89851000 | -3.98727000 |
| C | -3.49902700 | 0.53342300  | 1.22758400  | H    | 3.98943600  | -2.89334700 | -3.28853800 |
| C | -3.64202700 | -2.17935900 | 1.59217600  | H    | 2.98632200  | 1.12278900  | -4.43150700 |
| C | -4.69302900 | -0.03673500 | 1.64648400  | H    | 4.16086000  | -1.01474000 | -4.89992400 |
| C | -4.77132200 | -1.41048400 | 1.82110300  | C    | -0.66011000 | -0.80036600 | -1.57731300 |
| C | -1.11517600 | 1.92065000  | -0.29483400 | C    | -1.30396200 | 0.00059300  | -2.51767600 |
| C | -0.19242700 | 2.95740200  | -0.27468800 | C    | -0.56066800 | -2.15553400 | -1.90639600 |
| C | -2.17488200 | 2.14246200  | -1.17522000 | C    | -1.90226600 | -0.51803800 | -3.65994000 |
| C | -0.29408800 | 4.13247700  | -1.00808800 | C    | -1.15320400 | -2.70116600 | -3.03375100 |
| C | -2.32738200 | 3.29392200  | -1.93298900 | C    | -1.84071300 | -1.87821800 | -3.91417000 |
| C | -1.37974000 | 4.30467300  | -1.84889000 | F    | 0.16177900  | -2.99113200 | -1.15061700 |
| F | -3.67570100 | -3.49618300 | 1.79923400  | F    | -1.04004300 | -4.00217000 | -3.28997400 |
| F | -1.39372700 | -2.36071600 | 1.08441500  | F    | -2.40480900 | -2.38617200 | -5.00399500 |
| F | -3.49261300 | 1.87300000  | 1.15410400  | F    | -2.50190900 | 0.29407000  | -4.52580900 |
| F | -5.75581900 | 0.72567900  | 1.90066100  | F    | -1.29431600 | 1.33093400  | -2.40704500 |
| F | -5.90463100 | -1.97671000 | 2.22622200  | B    | -1.00724200 | 0.35919500  | 0.87995000  |
| F | -3.10054500 | 1.19588200  | -1.37354800 | P    | 2.49975800  | -0.02670700 | 0.98126400  |
| F | -3.36495700 | 3.42896600  | -2.75664700 | C    | 3.88528300  | 1.00718700  | 0.45128900  |
| F | -1.50973100 | 5.41407600  | -2.56959400 | C    | 3.97867800  | 2.30294400  | 0.96930900  |
| F | 0.63781100  | 5.08103500  | -0.90067300 | C    | 4.85892500  | 0.53140900  | -0.43580300 |
| F | 0.89237500  | 2.87537500  | 0.52833600  | C    | 5.03786300  | 3.12291900  | 0.59016000  |
| H | 0.77316500  | 0.98244700  | 1.79171900  | H    | 3.22202900  | 2.67611700  | 1.65214700  |
| C | -1.29826900 | 2.25736500  | 4.08844400  | C    | 5.91052100  | 1.35842000  | -0.80917200 |
| C | -1.28085600 | 1.13987600  | 4.92010300  | H    | 4.79133700  | -0.47476400 | -0.83869500 |
| C | -0.82543700 | -0.09271200 | 4.44006800  | C    | 5.99957000  | 2.65244500  | -0.29814700 |
| C | -0.40890200 | -0.19687400 | 3.12781400  | H    | 5.10705900  | 4.12886300  | 0.98955200  |
| C | -0.43185000 | 0.91188500  | 2.23518000  | H    | 6.66020900  | 0.99141800  | -1.50188300 |
| C | -0.87313100 | 2.14560900  | 2.77197000  | H    | 6.82321200  | 3.29434100  | -0.59349300 |
| H | -1.64930500 | 3.21122500  | 4.46758600  | C    | 3.16829900  | -1.61427300 | 1.54020800  |
| H | -1.61809300 | 1.22710200  | 5.94858800  | C    | 2.42260800  | -2.78525400 | 1.37256100  |



|   |             |             |             |       |             |             |             |
|---|-------------|-------------|-------------|-------|-------------|-------------|-------------|
| C | 4.39628900  | -1.64508100 | 2.20546200  | P4_TS |             |             |             |
| C | 2.91241300  | -3.98609900 | 1.87516000  | C     | -0.42515000 | -0.47085800 | -1.75975700 |
| H | 1.47328100  | -2.75669200 | 0.84321800  | H     | -0.96772600 | -0.72169600 | -2.67643000 |
| C | 4.87495600  | -2.85028400 | 2.70984000  | H     | 0.13206100  | 0.45124500  | -1.93824100 |
| H | 4.97662500  | -0.73473200 | 2.32709700  | C     | 0.53141300  | -1.59754500 | -1.31645600 |
| C | 4.13374800  | -4.01744800 | 2.54549000  | H     | -0.07701300 | -2.50011300 | -1.16760700 |
| H | 2.33827900  | -4.89687700 | 1.74263300  | H     | 1.17792100  | -1.82937100 | -2.17131200 |
| H | 5.82717000  | -2.87677600 | 3.22879000  | P     | -1.53390400 | -0.18491900 | -0.32319500 |
| H | 4.51086800  | -4.95641900 | 2.93759100  | B     | 1.49463100  | -1.37327300 | -0.00450600 |
| C | -2.42749200 | -0.43388500 | 1.12336000  | C     | 1.06248900  | -0.06048600 | 1.20482000  |
| C | -2.61008500 | -1.80075000 | 0.96802900  | C     | 1.21692300  | -0.43965000 | 2.55260300  |
| C | -3.49062600 | 0.20356300  | 1.76576200  | C     | 1.28916300  | 1.29870500  | 0.88356500  |
| C | -3.77227000 | -2.48319700 | 1.31163900  | C     | 1.60446900  | 0.47763700  | 3.52415500  |
| C | -4.67250300 | -0.42635800 | 2.12384500  | C     | 1.67993900  | 2.21595500  | 1.84466000  |
| C | -4.82112700 | -1.78611900 | 1.88539000  | C     | 1.83790200  | 1.80434100  | 3.17058700  |
| C | -1.21103200 | 1.91217400  | 0.33757700  | C     | -2.17817900 | 1.52446600  | -0.18331600 |
| C | -0.16088500 | 2.82310700  | 0.36128900  | C     | -2.59637400 | 1.88869800  | 1.11998100  |
| C | -2.36788300 | 2.42600900  | -0.24972000 | C     | -2.18355300 | 2.49727800  | -1.20494700 |
| C | -0.23552400 | 4.14184900  | -0.06831100 | C     | -3.04159000 | 3.18428800  | 1.36260600  |
| C | -2.50197200 | 3.73574400  | -0.68859600 | C     | -2.63064300 | 3.78727300  | -0.90724400 |
| C | -1.42859900 | 4.60933600  | -0.59182100 | C     | -3.06886300 | 4.15184700  | 0.36060500  |
| F | -3.87074900 | -3.79935500 | 1.11290400  | H     | -3.36413600 | 3.44853600  | 2.36706700  |
| F | -1.60420100 | -2.57355600 | 0.50620600  | H     | -2.63403700 | 4.53013200  | -1.70199500 |
| F | -3.39560900 | 1.50171600  | 2.09046200  | C     | -2.88698200 | -1.41950700 | -0.32627600 |
| F | -5.65734200 | 0.25415900  | 2.71099500  | C     | -3.98274400 | -1.37642200 | -1.21281900 |
| F | -5.94661000 | -2.41195800 | 2.22436800  | C     | -2.79686600 | -2.45871200 | 0.62763200  |
| F | -3.41730900 | 1.63399000  | -0.50026100 | C     | -4.96979800 | -2.35627400 | -1.11941700 |
| F | -3.64258400 | 4.15210900  | -1.23681800 | C     | -3.80782600 | -3.41881700 | 0.67699500  |
| F | -1.53788000 | 5.86687600  | -1.01317500 | C     | -4.90380900 | -3.38269500 | -0.18020800 |
| F | 0.82843000  | 4.94531800  | 0.01562600  | H     | -5.81264500 | -2.31806800 | -1.80590300 |
| F | 1.05969800  | 2.44906800  | 0.82111800  | H     | -3.73285000 | -4.21981800 | 1.40852800  |
| H | 1.98118100  | 0.65385300  | 2.07980000  | C     | -4.11530000 | -0.32434100 | -2.28329200 |
| C | 0.60627600  | 1.28384900  | 4.38786700  | H     | -4.05579600 | 0.68668600  | -1.87176100 |
| C | 1.07613600  | 0.04038800  | 4.80955700  | H     | -3.32249300 | -0.42979400 | -3.03145500 |
| C | 0.78723300  | -1.08903200 | 4.04698200  | H     | -5.07048300 | -0.42603800 | -2.80192100 |
| C | 0.08282300  | -0.95666700 | 2.85268300  | C     | -5.99994600 | -4.41038400 | -0.08030300 |
| C | -0.31853900 | 0.29524400  | 2.35688800  | H     | -6.78518800 | -4.07060300 | 0.60306700  |
| C | -0.08840400 | 1.40214900  | 3.18487200  | H     | -6.46397900 | -4.58940500 | -1.05307700 |
| H | 0.78645700  | 2.16531000  | 4.99671500  | H     | -5.61804000 | -5.36027900 | 0.30042500  |
| H | 1.63394900  | -0.04948800 | 5.73644800  | C     | -1.64359800 | -2.59046600 | 1.59633400  |
| H | 1.11826700  | -2.07040200 | 4.37602600  | H     | -0.69047100 | -2.74137300 | 1.07955700  |
| H | -0.14633000 | -1.84870500 | 2.27243300  | H     | -1.53169700 | -1.69762600 | 2.22009600  |
| H | -0.43774100 | 2.38294000  | 2.87429700  | H     | -1.80602200 | -3.44475100 | 2.25669200  |
|   |             |             |             | C     | -1.70869800 | 2.25194800  | -2.61689000 |

|      |             |             |             |   |             |             |             |
|------|-------------|-------------|-------------|---|-------------|-------------|-------------|
| H    | -0.62165900 | 2.36180800  | -2.69356600 | C | -0.19218700 | 1.64657500  | 3.29396400  |
| H    | -1.96357000 | 1.25716300  | -2.97914500 | C | -1.75778200 | 1.57844300  | -0.39372000 |
| H    | -2.15708600 | 2.98328000  | -3.29269000 | C | -2.68350200 | 2.21584100  | 0.46459200  |
| C    | -3.57572900 | 5.54153300  | 0.64161800  | C | -1.13428200 | 2.30850000  | -1.42848000 |
| H    | -3.29557100 | 5.86732800  | 1.64645500  | C | -2.96492800 | 3.56620100  | 0.26811700  |
| H    | -3.17864300 | 6.26166600  | -0.07710700 | C | -1.45704700 | 3.65739200  | -1.57661300 |
| H    | -4.66832800 | 5.57535000  | 0.57777600  | C | -2.35963500 | 4.30831600  | -0.74102500 |
| C    | -2.54560300 | 0.91828100  | 2.27484800  | H | -3.67842900 | 4.04987600  | 0.93037700  |
| H    | -3.12813500 | 0.01250900  | 2.07563100  | H | -0.97805400 | 4.21724000  | -2.37627400 |
| H    | -1.51060000 | 0.61633900  | 2.47895000  | C | -2.85512600 | -1.22624900 | -0.24899700 |
| H    | -2.94503400 | 1.38220600  | 3.17866100  | C | -3.50948300 | -1.25922600 | -1.49970100 |
| H    | -0.06528000 | -0.39273500 | 0.68335300  | C | -3.30912900 | -2.03105700 | 0.81784600  |
| H    | 1.48321400  | -2.34496000 | 0.70565200  | C | -4.60599200 | -2.10028400 | -1.65903400 |
| C    | 4.08761300  | -1.42790900 | 0.41897600  | C | -4.41475000 | -2.85572700 | 0.60016200  |
| C    | 3.02308400  | -0.94981100 | -0.34062100 | C | -5.07414600 | -2.90770300 | -0.62311800 |
| C    | 3.37736300  | -0.06311300 | -1.35014200 | H | -5.10905800 | -2.12790700 | -2.62283300 |
| C    | 4.68281500  | 0.32131400  | -1.62133400 | H | -4.76577200 | -3.47912000 | 1.41825300  |
| C    | 5.71102700  | -0.19546000 | -0.84571400 | C | -3.07098200 | -0.42010000 | -2.67501900 |
| C    | 5.41162000  | -1.07459400 | 0.18462900  | H | -3.13358900 | 0.65011300  | -2.45792100 |
| F    | 3.86758600  | -2.25994700 | 1.44474200  | H | -2.03981200 | -0.64153400 | -2.96722800 |
| F    | 6.39564500  | -1.56522900 | 0.94049200  | H | -3.70120100 | -0.62719000 | -3.54126700 |
| F    | 6.97363500  | 0.15874900  | -1.08139700 | C | -6.26105500 | -3.80843000 | -0.83657700 |
| F    | 4.95792500  | 1.18101400  | -2.60515400 | H | -7.14285200 | -3.22783800 | -1.12270200 |
| F    | 2.41845200  | 0.50079200  | -2.11538800 | H | -6.06511300 | -4.52311700 | -1.64105600 |
| H    | 1.05497600  | -1.47978500 | 2.82259500  | H | -6.50157600 | -4.37110700 | 0.06711700  |
| H    | 1.73268300  | 0.15865200  | 4.55367400  | C | -2.67955500 | -2.04228300 | 2.19178100  |
| H    | 2.14449500  | 2.52097900  | 3.92649700  | H | -1.61842600 | -2.30359000 | 2.16757100  |
| H    | 1.86377800  | 3.25010600  | 1.57157800  | H | -2.75553500 | -1.06694900 | 2.68456500  |
| H    | 1.16614900  | 1.62503700  | -0.14849400 | H | -3.18756300 | -2.77204500 | 2.82400800  |
|      |             |             |             | C | -0.11379900 | 1.74771400  | -2.39022500 |
| P4_P |             |             |             | H | 0.87373200  | 1.68016500  | -1.92253100 |
| C    | 0.03743000  | -0.95989800 | -0.81923200 | H | -0.37222700 | 0.75620600  | -2.76248300 |
| H    | -0.30581300 | -1.29217600 | -1.80460000 | H | -0.02067600 | 2.41020000  | -3.25231100 |
| H    | 0.79481900  | -0.19100900 | -0.97140700 | C | -2.65180100 | 5.77449600  | -0.91416400 |
| C    | 0.61024900  | -2.10888700 | 0.04423300  | H | -1.85733900 | 6.37815300  | -0.46382700 |
| H    | -0.19122200 | -2.58428800 | 0.62717900  | H | -2.70907900 | 6.04337200  | -1.97175100 |
| H    | 0.95505800  | -2.87983600 | -0.64975300 | H | -3.59318600 | 6.05082400  | -0.43498500 |
| P    | -1.39333900 | -0.16871000 | -0.01418300 | C | -3.36578200 | 1.51489600  | 1.61359500  |
| B    | 1.83487700  | -1.61926200 | 1.03982300  | H | -3.91689300 | 0.62628600  | 1.29210400  |
| C    | 1.26050100  | -0.39116600 | 1.93818600  | H | -2.63099700 | 1.21361800  | 2.36952700  |
| C    | 0.53337700  | -0.65277600 | 3.11246900  | H | -4.07513400 | 2.19072700  | 2.09357300  |
| C    | 1.27498600  | 0.94744600  | 1.50734600  | H | -1.16622500 | -0.17689400 | 1.36191600  |
| C    | -0.18420600 | 0.33759900  | 3.78208100  | H | 2.14873700  | -2.54876600 | 1.75845300  |
| C    | 0.55254400  | 1.95066000  | 2.15561200  | C | 4.25344500  | -0.64085800 | 0.94119300  |

|       |             |             |             |   |             |             |             |
|-------|-------------|-------------|-------------|---|-------------|-------------|-------------|
| C     | 3.17038600  | -1.13257400 | 0.20891500  | C | 7.04683100  | -3.87693000 | 0.33227600  |
| C     | 3.39048000  | -1.16201100 | -1.16343000 | C | 2.45396300  | -3.00389200 | -1.46586800 |
| C     | 4.57042100  | -0.75027800 | -1.77760200 | C | 1.38193600  | 1.94277000  | 2.57772700  |
| C     | 5.61140900  | -0.27495200 | -0.99962900 | C | 2.91301000  | 5.35162900  | -0.72549800 |
| C     | 5.45033000  | -0.22004400 | 0.37861600  | C | 3.29851200  | 0.53244200  | -1.99272600 |
| F     | 4.16876200  | -0.55992400 | 2.27569500  | F | -3.21437800 | -1.50408000 | 2.66731700  |
| F     | 6.44693600  | 0.23761000  | 1.14098100  | F | -5.81950900 | -1.78587500 | 2.43629200  |
| F     | 6.75202800  | 0.12569600  | -1.56422800 | F | -7.09335700 | -1.21190400 | 0.09888600  |
| F     | 4.70371100  | -0.80965500 | -3.10721800 | F | -5.64223100 | -0.32448600 | -2.03428500 |
| F     | 2.43736200  | -1.60571900 | -2.01667100 | F | -3.01366700 | -0.02979100 | -1.84342100 |
| H     | 0.52504900  | -1.67124000 | 3.49728800  | F | -2.23073600 | 1.61918100  | 1.89684000  |
| H     | -0.73651000 | 0.09384100  | 4.68666400  | F | -1.91102700 | 4.20430700  | 1.44322800  |
| H     | -0.75258500 | 2.42313600  | 3.80717000  | F | -0.55296000 | 5.07192800  | -0.76220100 |
| H     | 0.56713600  | 2.96838600  | 1.77304400  | F | 0.45638100  | 3.24224400  | -2.50767600 |
| H     | 1.86450800  | 1.20990400  | 0.62789100  | F | 0.24056000  | 0.66494500  | -2.04324800 |
| P5_TS |             |             |             | H | 1.35312000  | -0.71173100 | 2.87978300  |
| P     | 1.83642700  | -0.58371100 | 0.43221500  | H | 1.15045100  | -2.16867000 | 1.94238700  |
| B     | -1.31354100 | -0.59468800 | 0.42817500  | H | -0.89096000 | -0.06275800 | 2.55218600  |
| C     | 0.92427900  | -1.09387000 | 1.95300400  | H | -1.06039300 | -1.75951400 | 2.35865200  |
| C     | -0.61331400 | -0.88288700 | 1.88700500  | H | 6.39928100  | -1.83648800 | 2.00570000  |
| C     | 3.39018000  | -1.56823800 | 0.44540800  | H | 4.82461300  | -4.16590400 | -1.21362200 |
| C     | 5.59924200  | -2.05420000 | 1.30166300  | H | 3.58655500  | 3.15133900  | -2.18193400 |
| C     | 5.76425000  | -3.08947900 | 0.38403600  | H | 6.89134200  | -4.85917700 | -0.11922200 |
| C     | 4.71934000  | -3.35731300 | -0.49422300 | H | 7.79860100  | -3.35097400 | -0.26533300 |
| C     | 3.53430800  | -2.61943300 | -0.48412400 | H | 7.46371900  | -4.01923900 | 1.33227500  |
| C     | 2.30713500  | 1.18697300  | 0.28612700  | H | 2.07108500  | -2.14520100 | -2.02280000 |
| C     | 1.97861700  | 2.19922800  | 1.21574900  | H | 1.59853100  | -3.46171300 | -0.95940300 |
| C     | 2.22552600  | 3.53008600  | 0.87693800  | H | 2.83889200  | -3.72971200 | -2.18491200 |
| C     | 2.78098400  | 3.90257400  | -0.34376800 | H | 1.17493300  | 2.89272400  | 3.07449700  |
| C     | 3.14438200  | 2.88957700  | -1.22373400 | H | 0.44140000  | 1.39392100  | 2.52278400  |
| C     | 2.91346600  | 1.54421100  | -0.94194600 | H | 2.06938400  | 1.37991300  | 3.21660600  |
| C     | -2.94340100 | -0.78661300 | 0.40601500  | H | 3.70410000  | 5.50012700  | -1.46378900 |
| C     | -3.73984900 | -1.21259200 | 1.46700300  | H | 3.12623300  | 5.97671200  | 0.14500200  |
| C     | -5.12044900 | -1.36387800 | 1.38191000  | H | 1.97203000  | 5.69959400  | -1.16415300 |
| C     | -5.77396800 | -1.06975900 | 0.19688500  | H | 3.63706200  | 1.04267000  | -2.89619300 |
| C     | -5.03255600 | -0.62200700 | -0.88598200 | H | 4.10043600  | -0.12902900 | -1.65228500 |
| C     | -3.65820600 | -0.48589400 | -0.75507700 | H | 2.43999800  | -0.08727400 | -2.26507500 |
| C     | -1.02277900 | 0.96648600  | -0.04368000 | C | 4.43607500  | -1.28765300 | 1.35133600  |
| C     | -1.54954700 | 1.95975200  | 0.78894500  | C | 4.34646000  | -0.19741900 | 2.38952100  |
| C     | -1.40711900 | 3.32442200  | 0.57729800  | H | 4.25157300  | 0.79135700  | 1.93219300  |
| C     | -0.73073600 | 3.76882300  | -0.54775900 | H | 3.48093800  | -0.34477900 | 3.04198500  |
| C     | -0.21047200 | 2.83558100  | -1.42618500 | H | 5.23802600  | -0.19903600 | 3.01915800  |
| C     | -0.36415000 | 1.48118500  | -1.15536000 | H | 1.94633300  | 4.30518500  | 1.58765800  |
|       |             |             |             | H | 0.37735800  | -1.22304000 | -0.44031900 |

|      |             |             |             |   |             |             |             |
|------|-------------|-------------|-------------|---|-------------|-------------|-------------|
| C    | -0.78091800 | -3.15103700 | -0.06175900 | C | -3.37947400 | 0.74947800  | 1.80303700  |
| C    | -0.74581500 | -1.87628200 | -0.68935000 | F | 3.26036900  | -2.51676500 | -1.63547700 |
| C    | -0.96619100 | -1.87316700 | -2.08862600 | F | 5.86132100  | -2.40286700 | -2.05081700 |
| C    | -1.22760100 | -3.04074200 | -2.79547600 | F | 7.36342000  | -0.39366500 | -0.97413800 |
| C    | -1.28145700 | -4.26423400 | -2.13404500 | F | 6.14199300  | 1.51420500  | 0.54300700  |
| C    | -1.05600500 | -4.31710100 | -0.75784900 | F | 3.54726700  | 1.44777100  | 0.97502700  |
| H    | -0.61574300 | -3.22178900 | 1.00845500  | F | 1.92560800  | 1.90472400  | -1.40561300 |
| H    | -0.93429300 | -0.93828200 | -2.62867800 | F | 0.80901700  | 4.22414200  | -0.85617600 |
| H    | -1.39758800 | -2.99408800 | -3.86621700 | F | -0.70409000 | 4.54894500  | 1.39654100  |
| H    | -1.49567600 | -5.17432300 | -2.68607800 | F | -1.14058400 | 2.40463600  | 3.01599400  |
| H    | -1.09547900 | -5.26664800 | -0.23383400 | F | -0.19123800 | 0.04345100  | 2.43335400  |
| P5_P |             |             |             | H | -1.08578000 | -1.36197700 | -2.58189800 |
| P    | -1.83476300 | -0.58054800 | -0.44915800 | H | -0.69424300 | -2.37134900 | -1.21031200 |
| B    | 1.58155800  | -0.64114300 | -0.11257300 | H | 0.91446800  | 0.04347100  | -2.17389400 |
| C    | -0.62737900 | -1.34181100 | -1.58622100 | H | 1.36427400  | -1.63528800 | -2.15030600 |
| C    | 0.83282800  | -0.86895000 | -1.57921800 | H | -6.10837200 | -2.22666900 | -2.31053300 |
| C    | -3.30163400 | -1.64775700 | -0.49970000 | H | -4.63877500 | -4.30415500 | 1.12854900  |
| C    | -5.35883100 | -2.35054200 | -1.53301000 | H | -3.96393800 | 3.31998000  | 1.54982400  |
| C    | -5.51077700 | -3.36759600 | -0.59487800 | H | -7.12262400 | -4.44740600 | 0.34166000  |
| C    | -4.53442200 | -3.51209900 | 0.39107400  | H | -7.45962200 | -3.94073900 | -1.32252600 |
| C    | -3.42254800 | -2.67645400 | 0.46255000  | H | -6.36745700 | -5.29498100 | -1.00771200 |
| C    | -2.30570700 | 1.17498000  | -0.50035300 | H | -2.36767800 | -2.06054400 | 2.25820400  |
| C    | -1.97842900 | 2.06228200  | -1.54020500 | H | -1.39373300 | -3.06425800 | 1.18236200  |
| C    | -2.39220600 | 3.39344900  | -1.43483900 | H | -2.68164900 | -3.79064300 | 2.13862600  |
| C    | -3.09935500 | 3.86951100  | -0.33833500 | H | -1.58907300 | 2.21124700  | -3.63964500 |
| C    | -3.41880400 | 2.96799100  | 0.67790700  | H | -0.13884100 | 2.07494900  | -2.64251600 |
| C    | -3.03888300 | 1.63195000  | 0.62576300  | H | -1.11666800 | 0.64923900  | -2.97450200 |
| C    | 3.21608900  | -0.49976000 | -0.36419500 | H | -4.38816800 | 5.46039700  | 0.33873600  |
| C    | 3.90804200  | -1.46438000 | -1.09809200 | H | -3.56470600 | 5.79192300  | -1.19828600 |
| C    | 5.27859900  | -1.44786000 | -1.32196200 | H | -2.66292900 | 5.84772800  | 0.32259900  |
| C    | 6.04607600  | -0.43253500 | -0.77478300 | H | -3.96218800 | 1.31422100  | 2.53161500  |
| C    | 5.41995700  | 0.53567500  | -0.00811500 | H | -3.96452500 | -0.12702400 | 1.50888800  |
| C    | 4.04433500  | 0.47714200  | 0.18587100  | H | -2.47359100 | 0.40764200  | 2.31436400  |
| C    | 0.97354200  | 0.80493300  | 0.47786600  | C | -4.26801400 | -1.48203700 | -1.50849800 |
| C    | 1.17501000  | 1.95849700  | -0.28915600 | C | -4.18546400 | -0.39709200 | -2.55506500 |
| C    | 0.63802500  | 3.20441100  | -0.01209500 | H | -4.45020900 | 0.57959500  | -2.13832300 |
| C    | -0.13479700 | 3.37350500  | 1.12637300  | H | -3.18335100 | -0.30523700 | -2.98535800 |
| C    | -0.34094600 | 2.28520300  | 1.95077600  | H | -4.87229800 | -0.61460300 | -3.37492600 |
| C    | 0.19835200  | 1.04691200  | 1.60969900  | H | -2.12412600 | 4.07941100  | -2.23510600 |
| C    | -6.68336100 | -4.31012700 | -0.64973900 | H | -1.29704400 | -0.78874900 | 0.81951200  |
| C    | -2.40988300 | -2.90562800 | 1.56147700  | C | 1.16322000  | -3.21262400 | 0.41761300  |
| C    | -1.16624100 | 1.71447500  | -2.76285500 | C | 1.43655600  | -1.92046600 | 0.89273100  |
| C    | -3.45788600 | 5.32440300  | -0.21724500 | C | 1.74949100  | -1.82351300 | 2.25928100  |
|      |             |             |             | C | 1.71893700  | -2.92171900 | 3.11069100  |

|       |             |             |             |   |             |             |             |
|-------|-------------|-------------|-------------|---|-------------|-------------|-------------|
| C     | 1.39262800  | -4.18382800 | 2.61475800  | H | -3.91385200 | 0.60991600  | -2.38609300 |
| C     | 1.13264900  | -4.32865100 | 1.25720800  | H | -4.90627000 | 1.09077000  | -1.01796000 |
| H     | 1.01322800  | -3.37181400 | -0.64797700 | C | -5.74032800 | -1.87418100 | -1.17978200 |
| H     | 2.03298000  | -0.85447700 | 2.66525000  | H | -6.64465700 | -1.50854600 | -1.66058900 |
| H     | 1.96023800  | -2.79762300 | 4.16256800  | C | -5.74569200 | -3.13752300 | -0.60083800 |
| H     | 1.36891000  | -5.04527300 | 3.27524600  | C | -6.96496000 | -4.01943700 | -0.65353200 |
| H     | 0.91763700  | -5.31045900 | 0.84403700  | H | -6.84637600 | -4.79577100 | -1.41618200 |
|       |             |             |             | H | -7.86065800 | -3.44481700 | -0.89838400 |
| P6_TS |             |             |             | H | -7.12857600 | -4.52207200 | 0.30313300  |
| P     | -1.91274700 | -0.44426100 | -0.47731000 | C | -4.57681200 | -3.57032400 | 0.01698100  |
| C     | -1.33380100 | -0.40784500 | -2.23040900 | H | -4.55475500 | -4.55140800 | 0.48606500  |
| H     | -2.19004100 | -0.46564400 | -2.90759800 | C | -3.42416400 | -2.78657500 | 0.05449000  |
| H     | -0.78810000 | 0.51247300  | -2.43019000 | C | -2.21020800 | -3.37225700 | 0.72480800  |
| C     | -0.37794500 | -1.59553500 | -2.41281200 | H | -1.71381700 | -2.67248400 | 1.40311300  |
| H     | -0.76060700 | -2.46233500 | -1.85363300 | H | -1.47117500 | -3.67961700 | -0.01922000 |
| H     | -0.41663200 | -1.89964000 | -3.46495400 | H | -2.48129100 | -4.26112900 | 1.29833300  |
| C     | 1.08443600  | -1.28667000 | -2.04662500 | C | 1.19662000  | 0.95393000  | -0.47424500 |
| H     | 1.46140300  | -0.59315000 | -2.80497100 | C | 0.52569400  | 1.67603400  | 0.50594400  |
| H     | 1.64344400  | -2.20474100 | -2.23540900 | F | -0.08876700 | 1.04828500  | 1.52667100  |
| B     | 1.50784200  | -0.67749000 | -0.57385700 | C | 0.41891000  | 3.06254900  | 0.54615100  |
| C     | -2.52161500 | 1.16212500  | 0.18556400  | F | -0.27491200 | 3.65594500  | 1.51713800  |
| C     | -2.53534200 | 2.40129600  | -0.49269300 | C | 1.03334400  | 3.81950200  | -0.43485500 |
| C     | -1.99005200 | 2.62900800  | -1.88270800 | F | 0.94594600  | 5.14751300  | -0.42598000 |
| H     | -2.15933600 | 3.66590800  | -2.17890000 | C | 1.75267000  | 3.16505800  | -1.42636400 |
| H     | -2.45326300 | 1.99044200  | -2.63808900 | F | 2.38597900  | 3.87401200  | -2.36030100 |
| H     | -0.91070400 | 2.45311000  | -1.91627100 | C | 1.82244300  | 1.77741900  | -1.42208600 |
| C     | -3.04593400 | 3.52004800  | 0.16571900  | F | 2.59673800  | 1.24396800  | -2.37975800 |
| H     | -3.05234200 | 4.47173200  | -0.36094000 | C | 3.13012700  | -0.79284700 | -0.26948100 |
| C     | -3.52046000 | 3.47068900  | 1.47357900  | C | 4.09658500  | -1.38092900 | -1.08454200 |
| C     | -4.01065700 | 4.71619200  | 2.16104400  | F | 3.78707200  | -1.93690900 | -2.26611300 |
| H     | -4.60653400 | 4.47516400  | 3.04393200  | C | 5.44893100  | -1.44343300 | -0.75942900 |
| H     | -4.61906400 | 5.32718300  | 1.48938400  | F | 6.31265700  | -2.03444000 | -1.58653200 |
| H     | -3.16187200 | 5.32744000  | 2.48467100  | C | 5.90254600  | -0.88716300 | 0.42398800  |
| C     | -3.46684400 | 2.25045800  | 2.13583300  | F | 7.19236600  | -0.94262800 | 0.74832200  |
| H     | -3.80433100 | 2.18808400  | 3.16758300  | C | 4.98896400  | -0.27164100 | 1.26574300  |
| C     | -2.96517700 | 1.10235400  | 1.52544800  | F | 5.40045500  | 0.28013600  | 2.40840800  |
| C     | -2.87345400 | -0.15636700 | 2.35414800  | C | 3.65097300  | -0.23529500 | 0.90085500  |
| H     | -1.86218500 | -0.57845800 | 2.30790300  | F | 2.83612000  | 0.39413200  | 1.76788800  |
| H     | -3.57611700 | -0.92588500 | 2.01936600  | H | -0.38003300 | -1.14027600 | 0.24175700  |
| H     | -3.09042000 | 0.06642000  | 3.40034700  | C | 0.79996200  | -1.72647600 | 0.67922900  |
| C     | -3.43051000 | -1.50802800 | -0.54404600 | C | 0.91795000  | -3.09113500 | 0.29713800  |
| C     | -4.61628300 | -1.04539500 | -1.15992200 | C | 1.08880200  | -4.12397500 | 1.20650100  |
| C     | -4.77498200 | 0.31997600  | -1.78326000 | C | 1.11733400  | -3.84750700 | 2.57178200  |
| H     | -5.65252800 | 0.33127300  | -2.43250600 | C | 0.98631900  | -2.53046700 | 3.00342600  |

|      |             |             |             |   |             |             |             |
|------|-------------|-------------|-------------|---|-------------|-------------|-------------|
| C    | 0.84397000  | -1.49983400 | 2.08274500  | H | 4.48839200  | 0.88041500  | 1.96241400  |
| H    | 0.90202500  | -3.34822000 | -0.75614300 | C | 5.75048100  | -2.09935400 | 1.38950700  |
| H    | 1.19457500  | -5.14439900 | 0.85191200  | H | 6.57893000  | -1.94210000 | 2.07568300  |
| H    | 1.24310600  | -4.65033600 | 3.29194000  | C | 5.78994000  | -3.17471300 | 0.50414000  |
| H    | 1.01121900  | -2.30062600 | 4.06386300  | C | 6.94628300  | -4.13777100 | 0.51254800  |
| H    | 0.77066500  | -0.49392500 | 2.46505300  | H | 6.77204300  | -4.93561700 | 1.24167600  |
| P6_P |             |             |             | H | 7.87672900  | -3.63601000 | 0.78756300  |
| P    | 2.17236200  | -0.30429800 | 0.57529800  | H | 7.07966900  | -4.60519700 | -0.46524000 |
| C    | 1.16926600  | -0.69314300 | 2.03986200  | C | 4.72225500  | -3.34766100 | -0.37287600 |
| H    | 1.85723500  | -0.77930300 | 2.88491100  | H | 4.74470200  | -4.17759800 | -1.07427700 |
| H    | 0.48706200  | 0.13356800  | 2.23650100  | C | 3.61916000  | -2.49283200 | -0.39063600 |
| C    | 0.36936100  | -1.99502100 | 1.81084900  | C | 2.52742800  | -2.77231100 | -1.40041500 |
| H    | 0.77675600  | -2.55209400 | 0.95829700  | H | 2.38682400  | -1.94363100 | -2.10128700 |
| H    | 0.54676200  | -2.63619900 | 2.68098400  | H | 1.55117900  | -2.97086300 | -0.94753800 |
| C    | -1.13556600 | -1.74423600 | 1.63997900  | H | 2.78984900  | -3.65243900 | -1.98901300 |
| H    | -1.46483500 | -1.15679700 | 2.50712700  | C | -0.97171900 | 0.37979300  | -0.14381300 |
| H    | -1.61857200 | -2.71705800 | 1.76088200  | C | -0.37012300 | 0.71905300  | -1.35600700 |
| B    | -1.71593500 | -1.08592400 | 0.24433400  | F | -0.01210500 | -0.23433000 | -2.24453100 |
| C    | 2.56064000  | 1.44457800  | 0.28524600  | C | -0.02369000 | 2.01265600  | -1.73011200 |
| C    | 2.36338000  | 2.46146700  | 1.24597600  | F | 0.58243000  | 2.24347400  | -2.90033600 |
| C    | 1.89411600  | 2.25079500  | 2.66671800  | C | -0.23000900 | 3.05931400  | -0.84756300 |
| H    | 2.18702200  | 3.10991500  | 3.27259800  | F | 0.13263600  | 4.30245200  | -1.17047100 |
| H    | 2.31741200  | 1.36145200  | 3.13384300  | C | -0.74375100 | 2.77568500  | 0.40800200  |
| H    | 0.80132500  | 2.18289100  | 2.71492000  | F | -0.83925100 | 3.74657800  | 1.32172400  |
| C    | 2.57602000  | 3.78408200  | 0.85697100  | C | -1.09466000 | 1.46864000  | 0.72011000  |
| H    | 2.41197200  | 4.56908100  | 1.59054500  | F | -1.56128300 | 1.28157100  | 1.97266400  |
| C    | 2.96455000  | 4.13328300  | -0.43250600 | C | -3.33022900 | -0.67476700 | 0.44739600  |
| C    | 3.10235000  | 5.57463800  | -0.83398000 | C | -4.19315500 | -1.34255400 | 1.31835400  |
| H    | 3.86067600  | 5.70202700  | -1.60943400 | F | -3.76632600 | -2.35958000 | 2.08688500  |
| H    | 3.36472100  | 6.20282400  | 0.01980200  | C | -5.54192600 | -1.04140500 | 1.47581000  |
| H    | 2.14761900  | 5.93013600  | -1.23378800 | F | -6.29061300 | -1.72657300 | 2.34393700  |
| C    | 3.17155300  | 3.11078600  | -1.35511900 | C | -6.11272000 | -0.02635700 | 0.72800800  |
| H    | 3.47057700  | 3.35876100  | -2.36999300 | F | -7.40307300 | 0.27876000  | 0.86473500  |
| C    | 2.97857000  | 1.77330600  | -1.02609600 | C | -5.31437300 | 0.66079200  | -0.17056800 |
| C    | 3.16217600  | 0.73973900  | -2.10865100 | F | -5.83795400 | 1.63810200  | -0.91531500 |
| H    | 2.19497300  | 0.33644900  | -2.42933400 | C | -3.97207300 | 0.32279400  | -0.29133700 |
| H    | 3.80094800  | -0.08796600 | -1.78624600 | F | -3.30460300 | 1.04563500  | -1.21794500 |
| H    | 3.62436700  | 1.19598900  | -2.98487100 | H | 1.41298400  | -0.70871600 | -0.52113400 |
| C    | 3.60515400  | -1.41507700 | 0.52638300  | C | -1.66464000 | -2.15468800 | -0.99790100 |
| C    | 4.67642700  | -1.21535700 | 1.42205500  | C | -1.12996000 | -3.44414300 | -0.87438000 |
| C    | 4.70269500  | -0.08729600 | 2.42418900  | C | -1.12834900 | -4.36106500 | -1.92955100 |
| H    | 5.68532800  | -0.02192300 | 2.89397300  | C | -1.68578100 | -4.01494600 | -3.15289400 |
| H    | 3.97439100  | -0.24871700 | 3.22655900  | C | -2.25224700 | -2.74848800 | -3.30248400 |
|      |             |             |             | C | -2.24021300 | -1.84897800 | -2.24480100 |

|       |             |             |             |   |             |             |             |
|-------|-------------|-------------|-------------|---|-------------|-------------|-------------|
| H     | -0.71999900 | -3.77080200 | 0.07862500  | H | -1.54582600 | -3.02276500 | -0.60149600 |
| H     | -0.70261600 | -5.35067800 | -1.78448600 | H | -2.00919500 | -2.00878600 | -1.95625400 |
| H     | -1.69471000 | -4.72272700 | -3.97642300 | C | -2.68523300 | 1.69092200  | -0.32261600 |
| H     | -2.70825900 | -2.46591500 | -4.24734700 | C | -3.06214600 | 1.82605800  | -1.68284100 |
| H     | -2.68565900 | -0.86730700 | -2.39224700 | C | -3.42071000 | 3.07519400  | -2.17962900 |
| P7_TS |             |             |             | H | -3.70835900 | 3.16043400  | -3.22492500 |
| P     | -2.08575300 | 0.00777200  | 0.10938000  | C | -3.39885000 | 4.21776300  | -1.38293800 |
| B     | 1.39377800  | -0.22699200 | 0.08544100  | C | -3.01205200 | 4.07422400  | -0.05554300 |
| C     | -1.29967900 | -0.62141900 | 2.95143700  | H | -2.98733400 | 4.95304100  | 0.58510400  |
| H     | -2.09310100 | -0.10667800 | 3.50053500  | C | -2.65595200 | 2.84012500  | 0.49738000  |
| C     | -0.96402300 | -0.00454700 | 1.57744500  | C | -3.03330500 | 0.66411800  | -2.64704000 |
| H     | -0.68737300 | 1.03552800  | 1.72909900  | H | -3.63344000 | -0.18184400 | -2.29791900 |
| C     | 0.30209500  | -0.81781700 | 1.15396600  | H | -2.00489400 | 0.31132800  | -2.79300800 |
| H     | -0.09534700 | -1.66951900 | 0.57992700  | H | -3.42034800 | 0.97197600  | -3.62007900 |
| C     | 0.76951900  | -1.43130400 | 2.51276100  | C | -3.80634700 | 5.55664700  | -1.93828900 |
| H     | 1.85121800  | -1.55952500 | 2.60179600  | H | -4.89658100 | 5.65648800  | -1.94401100 |
| C     | -0.05420000 | -2.71747300 | 2.70083100  | H | -3.46129300 | 5.67790100  | -2.96812000 |
| H     | 0.24714600  | -3.25106200 | 3.60813900  | H | -3.40073000 | 6.37516200  | -1.33979500 |
| H     | 0.05261600  | -3.40510100 | 1.85583100  | C | -2.24132400 | 2.86419600  | 1.95140200  |
| C     | -1.50461800 | -2.15419100 | 2.84007400  | H | -2.74454400 | 3.68803800  | 2.46240200  |
| H     | -2.14203500 | -2.42691800 | 1.99444200  | H | -1.16219800 | 3.02947800  | 2.05654100  |
| H     | -1.99324800 | -2.53407400 | 3.74123000  | H | -2.48322700 | 1.94379200  | 2.47972800  |
| C     | 0.10411300  | -0.54717700 | 3.58588500  | C | 2.46466900  | 0.96040200  | 0.48482200  |
| H     | 0.13854000  | -1.01131900 | 4.57707500  | F | 3.87241400  | 0.34424100  | -1.32504000 |
| H     | 0.49734600  | 0.46604900  | 3.64947600  | C | 3.60679900  | 1.16255500  | -0.29593400 |
| C     | -3.56316100 | -1.08929100 | 0.25755600  | F | 5.59132600  | 2.30725300  | -0.87947900 |
| C     | -4.69517200 | -0.74017200 | 1.02644400  | C | 4.51865800  | 2.18841900  | -0.09723300 |
| C     | -5.80284300 | -1.58915900 | 1.02510100  | F | 5.16203600  | 4.10349200  | 1.12565300  |
| H     | -6.67099500 | -1.31107300 | 1.61784000  | C | 4.30315200  | 3.10768000  | 0.92012200  |
| C     | -5.83075800 | -2.77476500 | 0.29783500  | F | 2.91608000  | 3.86831400  | 2.66627300  |
| C     | -4.70143100 | -3.11049100 | -0.44316200 | C | 3.16928900  | 2.98025100  | 1.70283200  |
| H     | -4.69512600 | -4.03590500 | -1.01397400 | F | 1.17300400  | 1.94923000  | 2.22571400  |
| C     | -3.56932300 | -2.29766800 | -0.47513300 | C | 2.28967600  | 1.93039400  | 1.46190700  |
| C     | -4.76775900 | 0.49844100  | 1.87945600  | C | 2.17997900  | -1.59930200 | -0.38679000 |
| H     | -5.69676200 | 0.50839000  | 2.45221900  | F | 4.05123900  | -1.22808500 | 1.03645400  |
| H     | -4.72485800 | 1.41230800  | 1.28171100  | C | 3.39401400  | -2.00944300 | 0.16541200  |
| H     | -3.94024700 | 0.52510500  | 2.59241800  | F | 5.16532300  | -3.54715200 | 0.45715700  |
| C     | -7.02949200 | -3.68484000 | 0.33746700  | C | 3.99908500  | -3.23089800 | -0.10500500 |
| H     | -7.93720000 | -3.13426100 | 0.59376400  | F | 3.94153200  | -5.30990300 | -1.22241800 |
| H     | -6.89248400 | -4.46904700 | 1.08906500  | C | 3.37783300  | -4.13445700 | -0.95371100 |
| H     | -7.18377900 | -4.17639100 | -0.62599700 | F | 1.51672700  | -4.65273100 | -2.30707000 |
| C     | -2.37821700 | -2.76999200 | -1.26465200 | C | 2.15294500  | -3.79670300 | -1.50519800 |
| H     | -2.62855000 | -3.66425800 | -1.83838300 | F | 0.37426800  | -2.33337800 | -1.73793600 |
|       |             |             |             | C | 1.59306700  | -2.56347200 | -1.19827100 |

|      |             |             |             |   |             |             |             |
|------|-------------|-------------|-------------|---|-------------|-------------|-------------|
| H    | -0.56793500 | -0.00847200 | -0.92083900 | H | -3.80983400 | -0.61116400 | -2.65245000 |
| C    | 0.94498900  | 1.27373500  | -3.61953300 | C | -6.75866300 | 3.99525900  | -0.89875200 |
| C    | 0.62407600  | 2.59493500  | -3.31598400 | H | -6.39256300 | 5.02235000  | -0.96721100 |
| C    | 0.28062400  | 2.94849900  | -2.00862000 | H | -7.41214900 | 3.93654900  | -0.02251600 |
| C    | 0.26426300  | 1.97545900  | -1.02796700 | H | -7.36439300 | 3.78412700  | -1.78215000 |
| C    | 0.56107000  | 0.60150400  | -1.28395300 | C | -2.26889400 | 2.88537000  | 1.00569200  |
| C    | 0.90737300  | 0.30089000  | -2.62827100 | H | -2.42552900 | 3.90574500  | 1.35788100  |
| H    | 1.22798900  | 1.00261400  | -4.63132400 | H | -1.34175600 | 2.87659700  | 0.42622600  |
| H    | 0.64633800  | 3.35141100  | -4.09460200 | H | -2.10118100 | 2.25760500  | 1.88674800  |
| H    | 0.02723000  | 3.97459600  | -1.76242900 | C | -2.89004400 | -1.60769000 | 0.34987200  |
| H    | 0.02182600  | 2.27082900  | -0.00903200 | C | -3.41319800 | -1.60537900 | 1.66578500  |
| H    | 1.15445200  | -0.71760400 | -2.89877600 | C | -3.96277000 | -2.77796000 | 2.17140300  |
| P7_P |             |             |             | H | -4.35975400 | -2.77407500 | 3.18349300  |
| P    | -2.16994000 | -0.02740400 | -0.19843000 | C | -3.99656000 | -3.95781000 | 1.42923500  |
| B    | 1.56350900  | 0.03910200  | 0.12918500  | C | -3.45349600 | -3.94035400 | 0.14972700  |
| C    | -1.05754700 | 0.44299000  | -2.87023700 | H | -3.45876700 | -4.85354300 | -0.44000600 |
| H    | -1.82581700 | -0.07428900 | -3.45329000 | C | -2.89241200 | -2.79059600 | -0.41408600 |
| C    | -0.83371100 | -0.13019900 | -1.44999500 | C | -3.32118700 | -0.41104600 | 2.58334700  |
| H    | -0.62016800 | -1.19214700 | -1.52711900 | H | -3.72373100 | 0.50170200  | 2.13344600  |
| C    | 0.44095900  | 0.63973600  | -0.95669200 | H | -2.27451000 | -0.23623400 | 2.86763900  |
| H    | 0.05448600  | 1.50811500  | -0.40746000 | H | -3.88047400 | -0.60115100 | 3.50039200  |
| C    | 0.99279900  | 1.20669900  | -2.30554600 | C | -4.60755400 | -5.20734400 | 2.00424000  |
| H    | 2.08088500  | 1.29679700  | -2.32364300 | H | -4.21718200 | -5.40642000 | 3.00573000  |
| C    | 0.22971700  | 2.50890300  | -2.59322700 | H | -4.40159300 | -6.07617800 | 1.37652700  |
| H    | 0.62257300  | 3.01403900  | -3.48143400 | H | -5.69327600 | -5.10118700 | 2.09106600  |
| H    | 0.28544800  | 3.21241100  | -1.75634100 | C | -2.30103500 | -2.94258700 | -1.79704300 |
| C    | -1.21857500 | 1.98454900  | -2.84606600 | H | -2.79457700 | -3.76525800 | -2.31815700 |
| H    | -1.92624900 | 2.32819600  | -2.08816800 | H | -1.23332900 | -3.18448600 | -1.74158600 |
| H    | -1.60299400 | 2.32669400  | -3.81079400 | H | -2.40195000 | -2.05223200 | -2.41704700 |
| C    | 0.38508000  | 0.30063400  | -3.39202900 | C | 2.63115400  | -1.11946100 | -0.39399600 |
| H    | 0.50223300  | 0.72209200  | -4.39556500 | F | 4.23295300  | -0.41842900 | 1.21202400  |
| H    | 0.74905100  | -0.72506700 | -3.38497300 | C | 3.86380000  | -1.27468100 | 0.24811700  |
| C    | -3.50940900 | 1.18305800  | -0.47548800 | F | 5.93523500  | -2.35426400 | 0.61997200  |
| C    | -4.60884200 | 0.86613600  | -1.29824000 | C | 4.76937000  | -2.28909000 | -0.02469800 |
| C    | -5.64118500 | 1.79473900  | -1.42695700 | F | 5.30257200  | -4.24511900 | -1.24035100 |
| H    | -6.48459500 | 1.54954300  | -2.06723600 | C | 4.45052300  | -3.25793800 | -0.96611900 |
| C    | -5.61889200 | 3.02105900  | -0.77067800 | F | 2.86696000  | -4.12459200 | -2.48283100 |
| C    | -4.51003400 | 3.32273300  | 0.01782900  | C | 3.22260400  | -3.18820800 | -1.59803000 |
| H    | -4.46119300 | 4.28708200  | 0.51695800  | F | 1.15002100  | -2.22676600 | -1.90948800 |
| C    | -3.44758000 | 2.43658900  | 0.17908300  | C | 2.35692000  | -2.14502300 | -1.28732300 |
| C    | -4.71560500 | -0.42339100 | -2.07008200 | C | 2.32546400  | 1.47288500  | 0.49795100  |
| H    | -5.54769800 | -0.37249900 | -2.77399500 | F | 4.20225700  | 1.15763600  | -0.93038000 |
| H    | -4.87860500 | -1.28166500 | -1.41224000 | C | 3.51433500  | 1.92740000  | -0.07069300 |
|      |             |             |             | F | 5.20566900  | 3.54390200  | -0.42703000 |



|       |             |             |             |      |             |             |             |
|-------|-------------|-------------|-------------|------|-------------|-------------|-------------|
| C     | 4.05745800  | 3.18793400  | 0.15100800  | C    | 5.24372900  | 1.25777600  | 0.20065000  |
| F     | 3.88972300  | 5.30612000  | 1.18367300  | H    | 5.35093100  | 0.81589200  | 1.19634100  |
| C     | 3.38957600  | 4.09080000  | 0.96356400  | H    | 5.88420500  | 0.71451500  | -0.49886800 |
| F     | 1.49174400  | 4.57520900  | 2.27840200  | H    | 5.61522700  | 2.28788000  | 0.24879700  |
| C     | 2.17908800  | 3.71425800  | 1.52202200  | C    | 3.74144500  | 1.76926100  | -1.72212200 |
| F     | 0.46140900  | 2.19200600  | 1.79527600  | H    | 4.25962900  | 2.73392700  | -1.78756400 |
| C     | 1.68456600  | 2.44107800  | 1.26909500  | H    | 4.24707700  | 1.07693400  | -2.39832000 |
| H     | -1.51399100 | 0.44364000  | 0.93995400  | H    | 2.72348100  | 1.92135500  | -2.07617200 |
| C     | 0.53412100  | -1.04069600 | 3.83536900  | C    | -0.56417000 | 1.34414800  | 0.25506600  |
| C     | -0.22393500 | -2.18589300 | 3.59737700  | C    | -0.26085100 | 2.42329200  | -0.57569300 |
| C     | -0.39702700 | -2.61581000 | 2.28503300  | C    | -1.62155300 | 1.61440700  | 1.13111800  |
| C     | 0.16484600  | -1.88872900 | 1.23767200  | C    | -0.87133100 | 3.67105000  | -0.50196100 |
| C     | 0.89402300  | -0.70264900 | 1.43531400  | C    | -2.25604300 | 2.84332900  | 1.25099200  |
| C     | 1.08050000  | -0.32100400 | 2.77388200  | C    | -1.87749400 | 3.88891300  | 0.42344800  |
| H     | 0.70901100  | -0.70887700 | 4.85497200  | F    | 0.68078200  | 2.32900500  | -1.53058300 |
| H     | -0.65331300 | -2.74555600 | 4.42306800  | F    | -0.49861100 | 4.65150800  | -1.32377000 |
| H     | -0.97061800 | -3.51483500 | 2.07018100  | F    | -3.24024000 | 3.01390600  | 2.13292900  |
| H     | 0.05464600  | -2.27943900 | 0.22614800  | F    | -2.11168900 | 0.64443000  | 1.91580700  |
| H     | 1.68563300  | 0.55160300  | 3.00027200  | F    | -2.47492100 | 5.07291000  | 0.50909300  |
| P8_TS |             |             |             | C    | -1.29023900 | -1.01104600 | -0.53154100 |
| C     | 1.34731500  | -0.40466600 | -0.89853000 | C    | -2.26163900 | -1.72492200 | 0.17162600  |
| H     | 1.27211000  | -1.40394700 | -1.34243500 | C    | -1.55537000 | -0.88867500 | -1.89749600 |
| H     | 1.37118900  | 0.27989400  | -1.74314800 | C    | -3.36706200 | -2.31726000 | -0.43246700 |
| P     | 2.93874700  | -0.37125000 | 0.04198700  | C    | -2.64546400 | -1.45920600 | -2.53944300 |
| B     | 0.01006000  | -0.19413100 | 0.07449900  | C    | -3.56210800 | -2.18827100 | -1.79718900 |
| C     | 4.00223900  | -1.81017500 | -0.58212900 | F    | -0.74034400 | -0.15587100 | -2.67600600 |
| C     | 3.17231300  | -3.09739900 | -0.45114200 | F    | -2.82255400 | -1.30376200 | -3.85152500 |
| H     | 2.28159500  | -3.10120500 | -1.08466900 | F    | -4.61775500 | -2.74616200 | -2.38480800 |
| H     | 3.79453600  | -3.94416100 | -0.76156900 | F    | -4.24690000 | -3.00182400 | 0.29954800  |
| H     | 2.87028900  | -3.27078400 | 0.58655100  | F    | -2.19683100 | -1.89039400 | 1.50051300  |
| C     | 5.22688400  | -1.99615400 | 0.32844700  | H    | 1.62045600  | -0.59859200 | 1.36959500  |
| H     | 5.71736700  | -2.94251600 | 0.07241400  | C    | 0.15715700  | -0.29256900 | 2.89144300  |
| H     | 5.96752400  | -1.20589100 | 0.21441300  | C    | -0.17648700 | -1.02068200 | 4.02347500  |
| H     | 4.93334200  | -2.04461000 | 1.38181200  | C    | -0.19388500 | -2.41263500 | 3.96200200  |
| C     | 4.44057400  | -1.64190100 | -2.03941700 | C    | 0.12498900  | -3.08201200 | 2.77548900  |
| H     | 5.16210600  | -0.82867900 | -2.15267000 | C    | 0.44269900  | -2.34478700 | 1.65373900  |
| H     | 4.92690100  | -2.56249600 | -2.38508900 | C    | 0.46264100  | -0.91983500 | 1.65837100  |
| H     | 3.58751900  | -1.44326800 | -2.69648700 | H    | 0.21591300  | 0.79224400  | 2.94861200  |
| C     | 3.78363000  | 1.29008800  | -0.26642300 | H    | -0.41355000 | -0.51368300 | 4.95249300  |
| C     | 3.02923000  | 2.28272100  | 0.63371600  | H    | -0.45086200 | -2.98534100 | 4.84826700  |
| H     | 1.95720700  | 2.28536600  | 0.43410200  | H    | 0.10525400  | -4.16598200 | 2.73928800  |
| H     | 3.18073600  | 2.04353200  | 1.69103200  | H    | 0.67659100  | -2.85734000 | 0.72312400  |
| H     | 3.40638300  | 3.29592100  | 0.45288700  | P8_P |             |             |             |

|   |             |             |             |       |             |             |             |
|---|-------------|-------------|-------------|-------|-------------|-------------|-------------|
| C | 1.12348200  | -0.42777200 | -0.86966500 | C     | -1.74989800 | -1.30242800 | -1.53296600 |
| H | 1.05626300  | -1.48614700 | -1.13675100 | C     | -3.16750000 | -2.80710500 | 0.25747400  |
| H | 1.01479100  | 0.13425300  | -1.79771200 | C     | -2.78189800 | -2.10512100 | -1.99590700 |
| P | 2.83124100  | -0.22074100 | -0.31573900 | C     | -3.49730100 | -2.87098300 | -1.08649300 |
| B | -0.15516400 | -0.17945100 | 0.24121900  | F     | -1.11992000 | -0.55379800 | -2.46061600 |
| C | 3.93324200  | -1.63473200 | -0.83999300 | F     | -3.09534500 | -2.14387900 | -3.29231700 |
| C | 3.13592300  | -2.94393200 | -0.71169800 | F     | -4.49096400 | -3.65387200 | -1.50229800 |
| H | 2.35375400  | -3.03046300 | -1.46904300 | F     | -3.85652000 | -3.53042400 | 1.14110600  |
| H | 3.83006100  | -3.77786800 | -0.85817400 | F     | -1.89537900 | -1.97905900 | 1.99490900  |
| H | 2.68268000  | -3.04955300 | 0.27844700  | H     | 2.92582700  | -0.27108400 | 1.08329800  |
| C | 5.12720400  | -1.72135200 | 0.12383200  | C     | 0.92053700  | 0.50446300  | 2.56545700  |
| H | 5.73844000  | -2.58537900 | -0.15657300 | C     | 1.76567200  | 0.24081700  | 3.64598700  |
| H | 5.76853800  | -0.83991900 | 0.09282500  | C     | 2.21120500  | -1.05552400 | 3.88571400  |
| H | 4.78788600  | -1.87026700 | 1.15425700  | C     | 1.77418400  | -2.08720700 | 3.05356200  |
| C | 4.40094400  | -1.46827200 | -2.28930600 | C     | 0.92974100  | -1.80612900 | 1.98279100  |
| H | 5.08265600  | -0.62239000 | -2.40867500 | C     | 0.50031800  | -0.50147900 | 1.68839500  |
| H | 4.93851900  | -2.37274600 | -2.59269300 | H     | 0.60206200  | 1.53010800  | 2.38773200  |
| H | 3.55679700  | -1.33779700 | -2.97451900 | H     | 2.07530500  | 1.05096000  | 4.30051400  |
| C | 3.48060600  | 1.47243300  | -0.71930900 | H     | 2.87149300  | -1.26574900 | 4.72129000  |
| C | 2.66174500  | 2.43243100  | 0.16098600  | H     | 2.08558500  | -3.11044300 | 3.24718800  |
| H | 1.58972400  | 2.33599300  | -0.02178900 | H     | 0.59802800  | -2.62492200 | 1.34409100  |
| H | 2.84938800  | 2.25857100  | 1.22476200  |       |             |             |             |
| H | 2.95504100  | 3.45970700  | -0.07980800 | P9_TS |             |             |             |
| C | 4.96222500  | 1.60825400  | -0.34804300 | C     | -0.64201200 | 0.01700700  | -1.15374000 |
| H | 5.15613000  | 1.31566300  | 0.68891700  | H     | -0.64136400 | -0.90676300 | -1.74449800 |
| H | 5.61318100  | 1.02925400  | -1.00832500 | H     | -0.77272500 | 0.82990800  | -1.87562000 |
| H | 5.24295000  | 2.66160500  | -0.45217300 | B     | 0.78561800  | 0.09093800  | -0.29030900 |
| C | 3.27307500  | 1.82605300  | -2.19825300 | C     | 0.49996800  | -0.78882700 | 1.31600000  |
| H | 3.67180900  | 2.83250500  | -2.36447800 | C     | 0.68240100  | -0.16725500 | 2.57231600  |
| H | 3.80179200  | 1.14678600  | -2.87096900 | C     | 0.77364000  | -2.17995600 | 1.26614000  |
| H | 2.21592500  | 1.84409900  | -2.46489100 | C     | 1.16486900  | -0.85435400 | 3.68022300  |
| C | -0.87470500 | 1.29991600  | 0.16769300  | C     | 1.24873500  | -2.88066800 | 2.36211500  |
| C | -0.77545800 | 2.25760000  | -0.83479700 | C     | 1.45564700  | -2.21233400 | 3.57154800  |
| C | -1.83568200 | 1.59792500  | 1.13802600  | C     | 1.97897300  | -0.73115800 | -1.03344800 |
| C | -1.51329000 | 3.43651500  | -0.86737400 | C     | 3.14753400  | -1.11440900 | -0.35334000 |
| C | -2.59671400 | 2.75854600  | 1.15134400  | C     | 1.94787900  | -0.99096400 | -2.40900800 |
| C | -2.43480500 | 3.68948300  | 0.13457600  | C     | 4.20887700  | -1.73773600 | -0.99753300 |
| F | 0.09932700  | 2.11064200  | -1.85524500 | C     | 3.00821700  | -1.61245100 | -3.07172900 |
| F | -1.34085800 | 4.31812400  | -1.85403000 | C     | 4.14282800  | -1.99395200 | -2.36730700 |
| F | -3.48901500 | 2.98133100  | 2.11554000  | P     | -2.07941000 | -0.12503200 | -0.03314900 |
| F | -2.07390200 | 0.72452300  | 2.12392100  | C     | -3.16653500 | -1.50820100 | -0.70263500 |
| F | -3.15245600 | 4.81042800  | 0.12472100  | C     | -4.47711300 | -1.59587500 | 0.08628400  |
| C | -1.35356800 | -1.22242600 | -0.19874100 | H     | -5.13670600 | -0.74874100 | -0.11998100 |
| C | -2.12297400 | -1.98706500 | 0.67704600  | H     | -5.01205600 | -2.50674600 | -0.20621800 |

|   |             |             |             |      |             |             |             |
|---|-------------|-------------|-------------|------|-------------|-------------|-------------|
| H | -4.29737400 | -1.64398500 | 1.16521900  |      |             |             |             |
| C | -3.46418200 | -1.37928200 | -2.20123000 | P9-P |             |             |             |
| H | -4.08947700 | -0.51316700 | -2.42643300 | C    | -0.27019200 | -0.20019800 | -1.02472000 |
| H | -2.54599400 | -1.30166300 | -2.78987300 | H    | -0.25151400 | -1.21626100 | -1.43490700 |
| H | -4.00081700 | -2.27472600 | -2.53795500 | H    | -0.19558000 | 0.48170600  | -1.88158100 |
| C | -2.36906300 | -2.80177200 | -0.46207600 | B    | 1.07349400  | -0.09086100 | 0.05536600  |
| H | -1.42667700 | -2.81229100 | -1.01892100 | C    | 0.47134800  | -0.47661500 | 1.52545300  |
| H | -2.14187500 | -2.94291100 | 0.59954400  | C    | 0.03523400  | 0.47591800  | 2.46193800  |
| H | -2.96219400 | -3.65800400 | -0.80329600 | C    | 0.11922700  | -1.81013300 | 1.80019200  |
| C | -2.99415500 | 1.50797800  | 0.11523700  | C    | -0.73724400 | 0.13455500  | 3.57423900  |
| C | -3.82988100 | 1.48874100  | 1.40455000  | C    | -0.65269000 | -2.16891900 | 2.90491000  |
| H | -4.30282700 | 2.46856600  | 1.53710700  | C    | -1.09739700 | -1.19220100 | 3.79486000  |
| H | -4.62204000 | 0.73768600  | 1.38451400  | C    | 2.16735800  | -1.18566900 | -0.47068400 |
| H | -3.19802900 | 1.29649000  | 2.27686500  | C    | 3.05507800  | -1.80623100 | 0.42192100  |
| C | -3.88167200 | 1.83076900  | -1.09018900 | C    | 2.34751200  | -1.48298300 | -1.82936800 |
| H | -4.73491600 | 1.15119300  | -1.16688900 | C    | 4.04931200  | -2.68078400 | -0.00867000 |
| H | -4.27904200 | 2.84710000  | -0.98153400 | C    | 3.33822600  | -2.35416300 | -2.27758100 |
| H | -3.31819200 | 1.79026900  | -2.02773500 | C    | 4.19392300  | -2.96312200 | -1.36479500 |
| C | -1.92537000 | 2.59954900  | 0.25513500  | P    | -1.92930300 | -0.00562300 | -0.36812000 |
| H | -1.19406800 | 2.37216200  | 1.03838900  | C    | -3.06509800 | -1.31422100 | -1.04546700 |
| H | -1.37016400 | 2.75001700  | -0.67206300 | C    | -4.50212400 | -1.11045600 | -0.55190600 |
| H | -2.41812400 | 3.54378700  | 0.51385400  | H    | -4.96808700 | -0.22008300 | -0.98203400 |
| H | 3.22320500  | -0.92304700 | 0.71646300  | H    | -5.10215400 | -1.97517500 | -0.85457800 |
| H | 5.09255200  | -2.02289000 | -0.43350700 | H    | -4.55024300 | -1.03956300 | 0.53972800  |
| H | 4.96919700  | -2.48119800 | -2.87582800 | C    | -3.01975300 | -1.35045200 | -2.57789800 |
| H | 2.94342100  | -1.79674500 | -4.14054700 | H    | -3.42662000 | -0.44228400 | -3.02844100 |
| H | 1.08117000  | -0.69171100 | -2.99442000 | H    | -2.00093100 | -1.49462300 | -2.94780000 |
| H | 0.41764600  | 0.88330900  | 2.67330800  | H    | -3.62338100 | -2.19538100 | -2.92597000 |
| H | 1.30401400  | -0.34122800 | 4.62642300  | C    | -2.53809900 | -2.64855300 | -0.48535000 |
| H | 1.83159900  | -2.75635500 | 4.43318200  | H    | -1.51578600 | -2.86181000 | -0.81010700 |
| H | 1.46836500  | -3.94048500 | 2.28224900  | H    | -2.55422700 | -2.66324000 | 0.60873300  |
| H | 0.63749800  | -2.70212000 | 0.32154400  | H    | -3.18117900 | -3.45546000 | -0.85243100 |
| H | -0.74455000 | -0.54378700 | 1.04109200  | C    | -2.55596500 | 1.73916700  | -0.48497900 |
| C | 1.36078300  | 1.59526800  | -0.03833000 | C    | -3.57964800 | 1.98044100  | 0.63382700  |
| C | 2.22118900  | 1.95779900  | 1.01052600  | H    | -3.90252700 | 3.02587100  | 0.59167000  |
| C | 1.17894500  | 2.57318200  | -1.03170300 | H    | -4.46943300 | 1.35420600  | 0.54020600  |
| C | 2.80607900  | 3.21917300  | 1.09983800  | H    | -3.13119700 | 1.80616200  | 1.61712300  |
| H | 2.46450900  | 1.23135600  | 1.78050000  | C    | -3.16352800 | 2.03170500  | -1.86089000 |
| C | 1.75699900  | 3.83756000  | -0.96085900 | H    | -4.09579200 | 1.48701400  | -2.03145200 |
| H | 0.58111900  | 2.33863500  | -1.90968000 | H    | -3.38861100 | 3.10168100  | -1.92058800 |
| C | 2.56694200  | 4.17544000  | 0.11900500  | H    | -2.46564100 | 1.79586100  | -2.67095200 |
| H | 3.45775200  | 3.45086700  | 1.93770100  | C    | -1.35147600 | 2.66662900  | -0.26103500 |
| H | 1.57984500  | 4.55738200  | -1.75511400 | H    | -0.80315500 | 2.42657000  | 0.65392000  |
| H | 3.01725400  | 5.16099800  | 0.18619100  | H    | -0.63722900 | 2.62581200  | -1.08528000 |

|        |             |             |             |   |             |             |             |
|--------|-------------|-------------|-------------|---|-------------|-------------|-------------|
| H      | -1.72198500 | 3.69436100  | -0.18097800 | C | 3.90888400  | 3.12624300  | -1.16629700 |
| H      | 2.95901400  | -1.59949000 | 1.48627100  | H | 3.58226800  | 3.89646700  | -1.86157700 |
| H      | 4.71490500  | -3.14260300 | 0.71563700  | C | 2.99881700  | 2.12458100  | -0.81069400 |
| H      | 4.96705300  | -3.64491100 | -1.70622800 | C | 5.28099000  | 0.08413100  | 1.53482000  |
| H      | 3.44454800  | -2.55539200 | -3.34027700 | H | 4.99014300  | 0.27858600  | 2.57219900  |
| H      | 1.70426400  | -1.01024100 | -2.57148200 | H | 4.95995400  | -0.92513900 | 1.27253300  |
| H      | 0.29953100  | 1.52085400  | 2.31580400  | H | 6.37209700  | 0.10430000  | 1.50315700  |
| H      | -1.05630900 | 0.90655600  | 4.26972000  | C | 6.16750800  | 4.25123200  | -1.05417700 |
| H      | -1.69975800 | -1.46456400 | 4.65617500  | H | 7.09228300  | 3.83142400  | -1.46025900 |
| H      | -0.90524200 | -3.21266400 | 3.07471200  | H | 5.73656600  | 4.91865200  | -1.80283300 |
| H      | 0.45328100  | -2.58747000 | 1.11420200  | H | 6.43780400  | 4.85196500  | -0.18048500 |
| H      | -1.96857000 | -0.27124600 | 1.00858600  | C | 1.65826100  | 2.18487600  | -1.50229300 |
| C      | 1.81417500  | 1.36056000  | -0.01849500 | H | 1.77418200  | 1.90307800  | -2.55517800 |
| C      | 2.54483900  | 1.85057200  | 1.07579400  | H | 0.90577300  | 1.53366300  | -1.05855200 |
| C      | 1.90304600  | 2.11749800  | -1.19717700 | H | 1.27374200  | 3.20744500  | -1.48434400 |
| C      | 3.27531100  | 3.03553900  | 1.01755000  | C | 2.86125400  | -1.81251600 | 0.17426700  |
| H      | 2.55147400  | 1.27906500  | 2.00140900  | C | 3.18618200  | -2.88307600 | 1.03361700  |
| C      | 2.62719900  | 3.30473900  | -1.27497800 | C | 3.42683400  | -4.14778900 | 0.48321600  |
| H      | 1.40650000  | 1.76559100  | -2.10163900 | H | 3.66403000  | -4.96514700 | 1.16149100  |
| C      | 3.31184100  | 3.77788900  | -0.15903400 | C | 3.38916900  | -4.39167100 | -0.88141400 |
| H      | 3.82261100  | 3.37613600  | 1.89237200  | C | 3.15222000  | -3.30557400 | -1.72224000 |
| H      | 2.66438000  | 3.85713100  | -2.21014900 | H | 3.15881600  | -3.45558700 | -2.79975900 |
| H      | 3.87717900  | 4.70345800  | -0.21035400 | C | 2.88631100  | -2.03478200 | -1.22867900 |
|        |             |             |             | C | 3.36063500  | -2.79684900 | 2.53377800  |
| P10_TS |             |             |             | H | 4.24366700  | -3.37446500 | 2.81996600  |
| P      | 2.19043500  | -0.15957500 | 0.64992400  | H | 3.50318700  | -1.78289000 | 2.89653200  |
| B      | -1.59991100 | -0.17003300 | 0.74652400  | H | 2.50604400  | -3.22952400 | 3.06209800  |
| C      | 2.00629400  | 0.12245400  | 2.45322600  | C | 3.60027100  | -5.77132800 | -1.44499900 |
| H      | 1.63783600  | 1.15208200  | 2.48939700  | H | 4.00603100  | -6.45209200 | -0.69391500 |
| H      | 2.97618700  | 0.12662700  | 2.95060700  | H | 2.65230400  | -6.18989900 | -1.79955300 |
| C      | 1.00301000  | -0.81758600 | 3.15889300  | H | 4.28548400  | -5.74964600 | -2.29656500 |
| H      | 1.44648300  | -1.07967500 | 4.12577000  | C | 2.67444800  | -0.93085100 | -2.23516200 |
| H      | 0.91685000  | -1.76389000 | 2.61782700  | H | 2.50411900  | -1.35632200 | -3.22650800 |
| C      | -0.39177500 | -0.22941500 | 3.41874600  | H | 1.80573900  | -0.31509400 | -1.99413700 |
| H      | -0.75713200 | -0.70315300 | 4.33849800  | H | 3.54540100  | -0.26874200 | -2.28446600 |
| H      | -0.27630100 | 0.82609500  | 3.67103200  | C | -1.40258100 | 1.37126300  | 0.16545600  |
| C      | -1.52110800 | -0.41813000 | 2.37822500  | C | -0.80676000 | 2.42481900  | 0.85201200  |
| H      | -1.87938200 | -1.45172000 | 2.49860600  | F | -0.21590000 | 2.22287800  | 2.04372300  |
| H      | -2.35048100 | 0.18152000  | 2.77416800  | C | -0.75373500 | 3.73813200  | 0.40011400  |
| C      | 3.39666500  | 1.12374100  | 0.09692900  | F | -0.15251000 | 4.68206900  | 1.12578500  |
| C      | 4.72632900  | 1.12760400  | 0.59326600  | C | -1.31758900 | 4.06014200  | -0.82281300 |
| C      | 5.59318300  | 2.14088100  | 0.19706700  | F | -1.26123900 | 5.30555700  | -1.28935700 |
| H      | 6.61129300  | 2.13445200  | 0.58057400  | C | -1.91816700 | 3.05499100  | -1.56454300 |
| C      | 5.20322800  | 3.16040700  | -0.67171400 | F | -2.46791200 | 3.33975900  | -2.74490200 |

|       |             |             |             |   |             |             |             |
|-------|-------------|-------------|-------------|---|-------------|-------------|-------------|
| C     | -1.95727500 | 1.76147200  | -1.05777000 | H | 6.34480000  | 2.81698400  | 1.34838200  |
| C     | -3.19267600 | -0.54562600 | 0.41813900  | C | 5.06050500  | 3.56985900  | -0.20038200 |
| C     | -4.17062000 | 0.34295300  | 0.87435000  | C | 3.93970200  | 3.28849400  | -0.96846500 |
| F     | -3.81258900 | 1.47068200  | 1.51737800  | H | 3.61659000  | 4.00369800  | -1.72119200 |
| C     | -5.53722700 | 0.16164600  | 0.71797500  | C | 3.20125800  | 2.10950700  | -0.82517800 |
| F     | -6.40268700 | 1.06500700  | 1.18220400  | C | 5.24715300  | 0.51491700  | 2.03585400  |
| C     | -6.00129800 | -0.97338600 | 0.07134000  | H | 4.71158300  | 0.68337000  | 2.97613500  |
| F     | -7.30814400 | -1.17480000 | -0.09107500 | H | 5.15051000  | -0.53959800 | 1.76574700  |
| C     | -5.08003700 | -1.89316600 | -0.39734100 | H | 6.30390600  | 0.70355300  | 2.23331800  |
| F     | -5.50146200 | -2.99674000 | -1.01993100 | C | 5.82090100  | 4.85803100  | -0.36358800 |
| C     | -3.71756800 | -1.66714200 | -0.21810400 | H | 5.55245300  | 5.36333300  | -1.29298100 |
| F     | -2.92947100 | -2.63407400 | -0.71818100 | H | 5.60024800  | 5.53870100  | 0.46461400  |
| F     | -2.59046700 | 0.87095500  | -1.84131200 | H | 6.89940300  | 4.68042800  | -0.36435500 |
| H     | 0.49115900  | -0.52739500 | 0.17483700  | C | 2.06978100  | 1.92771100  | -1.80868700 |
| C     | -0.59032400 | -1.27011300 | -0.15367300 | H | 2.48541700  | 1.73192800  | -2.80361400 |
| C     | -0.38618300 | -2.56858900 | 0.39376300  | H | 1.37506600  | 1.12718000  | -1.57168600 |
| C     | -0.18023400 | -3.68973800 | -0.39207200 | H | 1.49318600  | 2.85320800  | -1.86512300 |
| C     | -0.18287300 | -3.56665200 | -1.78097900 | C | 3.57287100  | -1.82989800 | 0.22742100  |
| C     | -0.37127600 | -2.31799200 | -2.37168400 | C | 3.80310400  | -2.83735900 | 1.18771300  |
| C     | -0.56207700 | -1.20037200 | -1.57309800 | C | 4.47725900  | -3.99318700 | 0.79307500  |
| H     | -0.42041600 | -2.69226300 | 1.47150300  | H | 4.64926200  | -4.76883800 | 1.53468200  |
| H     | -0.02458700 | -4.66003700 | 0.06877900  | C | 4.92502300  | -4.18962200 | -0.50908900 |
| H     | -0.02965200 | -4.44373700 | -2.40377700 | C | 4.70014300  | -3.17485900 | -1.43473400 |
| H     | -0.36752800 | -2.21984300 | -3.45283800 | H | 5.05023700  | -3.29954700 | -2.45635500 |
| H     | -0.68416900 | -0.23327600 | -2.05201700 | C | 4.03646800  | -1.99745300 | -1.09951200 |
|       |             |             |             | C | 3.37032600  | -2.75211100 | 2.62939700  |
| P10_P |             |             |             | H | 3.64931900  | -3.66715600 | 3.15333800  |
| P     | 2.62998900  | -0.29752500 | 0.54777600  | H | 3.85055700  | -1.91979300 | 3.15316600  |
| B     | -2.17848400 | -0.23076200 | 0.42839200  | H | 2.28940700  | -2.63809400 | 2.71931700  |
| C     | 1.91057500  | -0.00174600 | 2.21094900  | C | 5.60713000  | -5.46852100 | -0.91265600 |
| H     | 1.70158200  | 1.07153000  | 2.16286200  | H | 4.88000800  | -6.17139700 | -1.33169600 |
| H     | 2.68959500  | -0.14178000 | 2.95979300  | H | 6.36818700  | -5.28800100 | -1.67513200 |
| C     | 0.61966400  | -0.79447800 | 2.51608500  | H | 6.08163800  | -5.95260000 | -0.05661900 |
| H     | 0.80271100  | -1.41736400 | 3.39646300  | C | 3.86306400  | -0.95971500 | -2.18039300 |
| H     | 0.41660900  | -1.48547100 | 1.69715500  | H | 4.10782700  | -1.39436000 | -3.15136600 |
| C     | -0.64443100 | 0.06046200  | 2.77099500  | H | 2.83196500  | -0.60226700 | -2.23961900 |
| H     | -0.82448000 | 0.07201300  | 3.85278600  | H | 4.51858300  | -0.09862700 | -2.01774900 |
| H     | -0.46126500 | 1.10423600  | 2.50155900  | C | -2.11086300 | 1.39456500  | 0.05492700  |
| C     | -1.90462200 | -0.46059700 | 2.05805900  | C | -0.89747900 | 2.07571900  | 0.12255300  |
| H     | -1.98577000 | -1.53943600 | 2.26724300  | F | 0.24699500  | 1.40421300  | 0.43163700  |
| H     | -2.75295300 | -0.01821000 | 2.58516900  | C | -0.70622900 | 3.42535100  | -0.12974600 |
| C     | 3.60804200  | 1.18703200  | 0.16052700  | F | 0.51611500  | 3.97289500  | -0.04215600 |
| C     | 4.75361900  | 1.44677800  | 0.95244500  | C | -1.79169000 | 4.19720700  | -0.50935400 |
| C     | 5.46009100  | 2.62484200  | 0.74573600  | F | -1.64716200 | 5.49676300  | -0.76688100 |

|        |             |             |             |   |             |             |             |
|--------|-------------|-------------|-------------|---|-------------|-------------|-------------|
| C      | -3.02607300 | 3.58099900  | -0.62713200 | H | -1.26233200 | 0.18572100  | 3.07657400  |
| F      | -4.08010500 | 4.29734300  | -1.01865300 | C | -0.66790900 | -1.03161600 | 1.38578200  |
| C      | -3.15866800 | 2.21831400  | -0.36468100 | H | -0.66153900 | -2.11473500 | 1.19481800  |
| C      | -3.70615900 | -0.84555800 | 0.18802800  | C | 3.18827100  | -1.79402300 | 0.16119200  |
| C      | -4.78214800 | -0.39196700 | 0.95697900  | C | 3.04156700  | -3.02366700 | -0.51510700 |
| F      | -4.62769800 | 0.66159500  | 1.78097800  | C | 4.08827500  | -3.94325400 | -0.52430100 |
| C      | -6.06247500 | -0.91971100 | 0.91383400  | H | 3.95086100  | -4.88700200 | -1.04663500 |
| F      | -7.03576600 | -0.42434100 | 1.68366100  | C | 5.29623100  | -3.68624900 | 0.11577000  |
| C      | -6.33539800 | -1.96953600 | 0.04849500  | C | 5.42764300  | -2.47354600 | 0.78331700  |
| F      | -7.55774400 | -2.50012300 | -0.00854600 | H | 6.35855000  | -2.25440800 | 1.30158100  |
| C      | -5.31896300 | -2.44665500 | -0.75741900 | C | 4.40914500  | -1.51887200 | 0.81891100  |
| F      | -5.56147300 | -3.44527900 | -1.61257000 | C | 1.76893700  | -3.38768800 | -1.22876300 |
| C      | -4.04678600 | -1.88107700 | -0.67969000 | H | 1.86273400  | -4.35637000 | -1.72386900 |
| F      | -3.15609200 | -2.41680500 | -1.53051700 | H | 0.93845200  | -3.45528100 | -0.52164100 |
| F      | -4.39020200 | 1.74245900  | -0.57999200 | H | 1.49284600  | -2.64318800 | -1.98260800 |
| H      | 1.53310300  | -0.36582500 | -0.31953200 | C | 6.43058800  | -4.67502400 | 0.06746400  |
| C      | -1.10264000 | -1.02867200 | -0.52497700 | H | 7.10076400  | -4.45172500 | -0.76914300 |
| C      | -0.63509200 | -2.30989700 | -0.17895300 | H | 7.02473200  | -4.64142500 | 0.98368200  |
| C      | 0.29447500  | -3.00882500 | -0.94406300 | H | 6.06136500  | -5.69420400 | -0.06709700 |
| C      | 0.77530100  | -2.45720200 | -2.13132300 | C | 4.71373600  | -0.24336300 | 1.56459400  |
| C      | 0.29489900  | -1.21396900 | -2.53504100 | H | 3.84964100  | 0.13612500  | 2.10941500  |
| C      | -0.61917300 | -0.51873700 | -1.73846700 | H | 5.51363800  | -0.42067400 | 2.28666000  |
| H      | -1.02211100 | -2.78202200 | 0.72221900  | H | 5.03817600  | 0.54823100  | 0.88203200  |
| H      | 0.63919300  | -3.98816500 | -0.62230000 | C | 2.64811800  | 1.02941500  | -0.25966500 |
| H      | 1.49989700  | -2.99583300 | -2.73631300 | C | 3.20652300  | 1.09730400  | -1.55816300 |
| H      | 0.63291200  | -0.77977800 | -3.47410400 | C | 3.89019600  | 2.24410300  | -1.95590500 |
| H      | -0.97317800 | 0.45157400  | -2.08269300 | H | 4.31479600  | 2.27899800  | -2.95644800 |
|        |             |             |             | C | 4.01335500  | 3.35151500  | -1.12472300 |
| P11_TS |             |             |             | C | 3.43417200  | 3.27945800  | 0.13715700  |
| P      | 1.79527500  | -0.57090300 | 0.07818300  | H | 3.50587400  | 4.14116800  | 0.79682300  |
| B      | -1.42224700 | -0.28560800 | 0.11409600  | C | 2.74944300  | 2.15123400  | 0.59389500  |
| C      | 0.81228300  | -0.63319700 | 1.66165300  | C | 3.03774500  | -0.00846700 | -2.57380200 |
| H      | 0.78112200  | 0.38413900  | 2.04830100  | H | 3.44185800  | 0.30455300  | -3.53824600 |
| C      | 1.44493400  | -1.55343800 | 2.71888800  | H | 3.54747000  | -0.93114400 | -2.27939400 |
| H      | 2.49088600  | -1.28553400 | 2.90230300  | H | 1.97516100  | -0.24115700 | -2.71501600 |
| H      | 1.45789900  | -2.58095400 | 2.32906900  | C | 4.69301700  | 4.61015500  | -1.59183100 |
| C      | 0.66122300  | -1.50751000 | 4.03204100  | H | 5.21015200  | 5.11112600  | -0.76990500 |
| H      | 0.77375800  | -0.50751800 | 4.47413800  | H | 5.41848300  | 4.40234200  | -2.38155100 |
| H      | 1.09245200  | -2.21835100 | 4.74496900  | H | 3.95368000  | 5.31134500  | -1.99264300 |
| C      | -0.82357600 | -1.78500900 | 3.80948800  | C | 2.15738100  | 2.26403800  | 1.98138800  |
| H      | -0.96337900 | -2.82534700 | 3.48542900  | H | 1.06457000  | 2.33933000  | 1.94628200  |
| H      | -1.37173300 | -1.66882500 | 4.75064900  | H | 2.41165200  | 1.42383700  | 2.63255000  |
| C      | -1.38980400 | -0.85192300 | 2.74073700  | H | 2.52761100  | 3.17132200  | 2.46224300  |
| H      | -2.46538600 | -1.00469700 | 2.63914600  | C | -3.04205300 | -0.57113800 | 0.04214900  |

|       |             |             |             |   |             |             |             |
|-------|-------------|-------------|-------------|---|-------------|-------------|-------------|
| C     | -3.91312600 | 0.28661900  | -0.62823500 | H | -0.82295400 | -2.53326800 | -4.60082300 |
| F     | -3.45129000 | 1.40555300  | -1.21157600 | C | 1.04446200  | -2.30413900 | -3.50602800 |
| C     | -5.27513700 | 0.05612300  | -0.77356000 | H | 1.01062000  | -3.34004500 | -3.14131300 |
| F     | -6.04578800 | 0.92917800  | -1.42311700 | H | 1.68512000  | -2.30308000 | -4.39421500 |
| C     | -5.83110700 | -1.10015400 | -0.24907400 | C | 1.65332800  | -1.41237400 | -2.42316400 |
| F     | -7.13351800 | -1.34456900 | -0.37774800 | H | 2.65302900  | -1.78429900 | -2.21632000 |
| C     | -5.00594700 | -2.00680800 | 0.39729400  | H | 1.77158400  | -0.39221400 | -2.80962000 |
| F     | -5.51654700 | -3.13623500 | 0.89068500  | C | 0.84096500  | -1.35872700 | -1.10179300 |
| C     | -3.64932900 | -1.73297600 | 0.51525000  | H | 0.73149100  | -2.40548900 | -0.78257000 |
| F     | -2.92064300 | -2.69810800 | 1.11234500  | C | -3.17136800 | -1.82077000 | -0.20499700 |
| C     | -1.12392100 | 1.34068700  | 0.15739600  | C | -2.93913000 | -2.97203300 | 0.57752400  |
| C     | -1.79320200 | 2.10662600  | 1.12097400  | C | -3.94775100 | -3.92685500 | 0.69341600  |
| F     | -2.72224300 | 1.54140500  | 1.90719000  | H | -3.75831100 | -4.81316300 | 1.29341000  |
| C     | -1.60483800 | 3.46768900  | 1.31496600  | C | -5.17532700 | -3.77930800 | 0.05589700  |
| F     | -2.29018400 | 4.12133600  | 2.25184700  | C | -5.37584700 | -2.64287900 | -0.72446400 |
| C     | -0.70967000 | 4.15811500  | 0.50838200  | H | -6.32348300 | -2.51974600 | -1.24346400 |
| F     | -0.51309900 | 5.46314500  | 0.67825900  | C | -4.40567800 | -1.65223600 | -0.87071100 |
| C     | -0.04352500 | 3.46425600  | -0.48523500 | C | -1.62950200 | -3.21333000 | 1.27958700  |
| F     | 0.81361700  | 4.09703300  | -1.28596600 | H | -1.57727600 | -4.23466100 | 1.66044000  |
| C     | -0.27131500 | 2.09885100  | -0.63867800 | H | -0.78175600 | -3.07148100 | 0.60658600  |
| F     | 0.40874100  | 1.54129000  | -1.66110800 | H | -1.47278800 | -2.53874800 | 2.12998800  |
| H     | 0.28723200  | -0.82336400 | -0.91857700 | C | -6.26392300 | -4.80752800 | 0.20850200  |
| C     | -1.59768700 | -1.12642300 | -3.79123800 | H | -7.02220500 | -4.46002000 | 0.91740100  |
| C     | -1.80149500 | -2.50288600 | -3.73069900 | H | -6.76559800 | -4.99334000 | -0.74438000 |
| C     | -1.60988200 | -3.17461400 | -2.52430300 | H | -5.86676500 | -5.75386100 | 0.58048800  |
| C     | -1.19968400 | -2.47037800 | -1.40413000 | C | -4.76073100 | -0.46313100 | -1.73212000 |
| C     | -0.95603200 | -1.07070500 | -1.41780700 | H | -3.95043000 | -0.16934200 | -2.40254000 |
| C     | -1.18944300 | -0.42857400 | -2.66228200 | H | -5.62508700 | -0.70792200 | -2.35208800 |
| H     | -1.77271600 | -0.59197100 | -4.71934200 | H | -5.01433000 | 0.41181300  | -1.12621900 |
| H     | -2.12388600 | -3.04690700 | -4.61341400 | C | -2.58387000 | 1.09783400  | -0.20488900 |
| H     | -1.79526700 | -4.24183400 | -2.45654400 | C | -3.18331300 | 1.45967200  | 1.02588300  |
| H     | -1.11865900 | -3.01129300 | -0.46767100 | C | -3.71642800 | 2.73909300  | 1.16387200  |
| H     | -1.07542500 | 0.64288200  | -2.74458300 | H | -4.15519800 | 3.01882200  | 2.11792700  |
|       |             |             |             | C | -3.68264600 | 3.66851700  | 0.12831900  |
| P11_P |             |             |             | C | -3.12603600 | 3.27418600  | -1.08434500 |
| P     | -1.84384700 | -0.56579700 | -0.24513800 | H | -3.10355300 | 3.98093200  | -1.91019800 |
| B     | 1.60912400  | -0.50410100 | 0.15351600  | C | -2.57390800 | 2.00816200  | -1.28378800 |
| C     | -0.57587200 | -0.87855800 | -1.55614300 | C | -3.23889500 | 0.54224500  | 2.22466800  |
| H     | -0.41673400 | 0.10446300  | -2.00177200 | H | -3.88028400 | 0.97840000  | 2.99160100  |
| C     | -1.22451900 | -1.80019400 | -2.61110200 | H | -3.64162900 | -0.44450700 | 1.97684300  |
| H     | -2.24119700 | -1.47200100 | -2.86358300 | H | -2.24681300 | 0.41016000  | 2.66684100  |
| H     | -1.32984200 | -2.80626000 | -2.18267700 | C | -4.18979800 | 5.06973400  | 0.32492200  |
| C     | -0.36563500 | -1.85941900 | -3.86894400 | H | -4.58800700 | 5.48326500  | -0.60423400 |
| H     | -0.33051600 | -0.86054800 | -4.32685000 | H | -4.96941500 | 5.10948500  | 1.08859900  |

|        |             |             |             |   |             |             |             |
|--------|-------------|-------------|-------------|---|-------------|-------------|-------------|
| H      | -3.36411300 | 5.70969200  | 0.65099500  | H | -1.63759000 | -1.92247500 | 2.73827900  |
| C      | -2.00371700 | 1.75244800  | -2.66160500 | C | -0.57874100 | -0.03371900 | 2.84370000  |
| H      | -0.93605400 | 1.99656500  | -2.69980900 | H | -0.75384100 | 1.02102900  | 2.60764300  |
| H      | -2.13004000 | 0.72539300  | -3.00790000 | H | -0.46656400 | -0.08086700 | 3.93341100  |
| H      | -2.50652500 | 2.40160700  | -3.38110400 | C | 0.72287700  | -0.51116200 | 2.18118400  |
| C      | 3.21586800  | -0.21319700 | -0.20980500 | H | 0.85044800  | -1.57098800 | 2.42135300  |
| C      | 3.90960600  | 0.99452400  | -0.19981700 | H | 1.53979800  | -0.01839900 | 2.71956000  |
| F      | 3.29368400  | 2.16839700  | 0.03626200  | B | 1.03125500  | -0.21980400 | 0.58364000  |
| C      | 5.28340400  | 1.11047000  | -0.40230300 | C | -3.20611900 | -2.27238100 | 0.28898700  |
| F      | 5.86577400  | 2.31190400  | -0.38574700 | C | -2.82679200 | -3.07887500 | -0.78876600 |
| C      | 6.04834200  | -0.02238400 | -0.60833400 | H | -1.93086500 | -2.83804200 | -1.35729400 |
| F      | 7.36319800  | 0.06805000  | -0.80580600 | C | -3.59524500 | -4.18983000 | -1.13082100 |
| C      | 5.41858100  | -1.25831000 | -0.60513000 | H | -3.30021700 | -4.81241400 | -1.96891900 |
| F      | 6.13262500  | -2.36948200 | -0.79721000 | C | -4.73529500 | -4.49900500 | -0.39586800 |
| C      | 4.05019400  | -1.32023100 | -0.39574600 | H | -5.33162900 | -5.36610700 | -0.66109600 |
| F      | 3.52354700  | -2.55974000 | -0.40483000 | C | -5.11666600 | -3.69769400 | 0.68050300  |
| C      | 0.82201500  | 0.95189000  | 0.41724400  | H | -6.00822700 | -3.94003100 | 1.24953100  |
| C      | 0.78425300  | 1.91952500  | -0.58609900 | C | -4.35633400 | -2.58545700 | 1.02178800  |
| F      | 1.34063000  | 1.65009000  | -1.78385200 | H | -4.65836700 | -1.95368500 | 1.85309600  |
| C      | 0.20900700  | 3.17359800  | -0.46527600 | C | -3.17522000 | 0.63402100  | 0.36056400  |
| F      | 0.16467500  | 4.00965100  | -1.50668600 | C | -3.20828900 | 1.71104900  | 1.25146500  |
| C      | -0.39237500 | 3.53191800  | 0.73195700  | H | -2.72669600 | 1.64107500  | 2.22118400  |
| F      | -0.98887800 | 4.71750000  | 0.86182000  | C | -3.84867600 | 2.89406400  | 0.89144100  |
| C      | -0.42261000 | 2.60769400  | 1.75920100  | H | -3.85704200 | 3.73178700  | 1.58130800  |
| F      | -1.09241800 | 2.88080100  | 2.88288500  | C | -4.46624700 | 3.00569800  | -0.35075700 |
| C      | 0.15768800  | 1.35498600  | 1.57625200  | H | -4.95128500 | 3.93364800  | -0.63490800 |
| F      | -0.06044700 | 0.49846900  | 2.59609700  | C | -4.45816200 | 1.92484600  | -1.23016300 |
| H      | -1.21923900 | -0.70881200 | 0.99631700  | H | -4.93637900 | 2.00967300  | -2.20031400 |
| C      | 2.57541800  | -1.34266000 | 3.88022700  | C | -3.81098700 | 0.74599500  | -0.88191700 |
| C      | 2.30561400  | -2.70554400 | 4.00873900  | H | -3.78264200 | -0.08537500 | -1.58139800 |
| C      | 1.80980800  | -3.39592200 | 2.91173500  | C | 0.30231700  | 1.17624700  | 0.08108200  |
| C      | 1.56424400  | -2.72370100 | 1.71160100  | C | 0.56165600  | 2.32329300  | 0.83544200  |
| C      | 1.76831400  | -1.34830800 | 1.56163200  | F | 1.37440000  | 2.24426400  | 1.90169000  |
| C      | 2.31901300  | -0.69465700 | 2.68017400  | C | 0.02655800  | 3.57690100  | 0.57699600  |
| H      | 2.99466400  | -0.78973300 | 4.71606400  | F | 0.30732900  | 4.61348400  | 1.36703300  |
| H      | 2.50293100  | -3.22096600 | 4.94377400  | C | -0.80663700 | 3.74746900  | -0.51926000 |
| H      | 1.63129500  | -4.46613300 | 2.97519800  | F | -1.34925000 | 4.93325500  | -0.78336500 |
| H      | 1.24510700  | -3.32120600 | 0.86259500  | C | -1.07607200 | 2.65617800  | -1.32460600 |
| H      | 2.55740200  | 0.36636400  | 2.60121400  | F | -1.87510000 | 2.78953100  | -2.38435200 |
|        |             |             |             | C | -0.53331000 | 1.41588500  | -1.00693000 |
| P12_TS |             |             |             | F | -0.93128100 | 0.41546000  | -1.82250500 |
| P      | -2.15792400 | -0.83961700 | 0.68297000  | C | 2.64911100  | -0.16970200 | 0.31150300  |
| C      | -1.81994400 | -0.87025500 | 2.48858700  | C | 3.49984200  | -1.09978500 | 0.90948900  |
| H      | -2.70843500 | -0.55171300 | 3.04621600  | F | 3.00107100  | -2.05628400 | 1.71049700  |



|       |             |             |             |   |             |             |             |
|-------|-------------|-------------|-------------|---|-------------|-------------|-------------|
| C     | 4.87372100  | -1.13359100 | 0.71526200  | C | 3.02937400  | 0.99999100  | -0.46087300 |
| F     | 5.62731700  | -2.04864200 | 1.32640000  | C | 2.81561000  | 2.00344000  | -1.40979200 |
| C     | 5.46349100  | -0.20509100 | -0.12927500 | H | 2.30796800  | 1.78700600  | -2.34344800 |
| F     | 6.77934600  | -0.21701400 | -0.32984600 | C | 3.24332400  | 3.30069000  | -1.14215400 |
| C     | 4.66230300  | 0.72460100  | -0.77178000 | H | 3.06273300  | 4.08543700  | -1.86894000 |
| F     | 5.21152900  | 1.61064200  | -1.60353000 | C | 3.87333400  | 3.59341700  | 0.06378100  |
| C     | 3.28938900  | 0.71882000  | -0.55053700 | H | 4.18018900  | 4.61144100  | 0.27885500  |
| F     | 2.59299600  | 1.62467500  | -1.25811300 | C | 4.10471200  | 2.58626600  | 0.99956400  |
| H     | -0.54925500 | -1.10057800 | -0.05654200 | H | 4.59012400  | 2.81678500  | 1.94128500  |
| C     | 0.91901800  | -4.06701100 | -0.59431000 | C | 3.68711400  | 1.28725200  | 0.74085500  |
| C     | 0.59395100  | -2.93073600 | 0.13626100  | H | 3.84703900  | 0.50612200  | 1.47941300  |
| C     | 0.60450400  | -1.64208600 | -0.43614200 | C | -0.49408300 | 0.90806500  | 0.02016500  |
| C     | 0.96250500  | -1.55708400 | -1.80178300 | C | -0.79523000 | 2.04707400  | -0.73456800 |
| C     | 1.29376300  | -2.68437900 | -2.53750700 | F | -1.58297700 | 1.93788800  | -1.81664700 |
| C     | 1.26981500  | -3.94432500 | -1.93598200 | C | -0.32374900 | 3.32410500  | -0.46939700 |
| H     | 0.89715900  | -5.04309200 | -0.12085300 | F | -0.62190000 | 4.34706900  | -1.27302400 |
| H     | 0.29668100  | -3.04571900 | 1.17542600  | C | 0.47606500  | 3.53524800  | 0.64506600  |
| H     | 1.01723800  | -0.58333700 | -2.27744500 | F | 0.97952700  | 4.74218800  | 0.90352400  |
| H     | 1.58067400  | -2.58625500 | -3.57955000 | C | 0.78055000  | 2.45825700  | 1.45454900  |
| H     | 1.52789000  | -4.82660800 | -2.51371700 | F | 1.57371800  | 2.62459600  | 2.51755200  |
| P12_P |             |             |             | C | 0.30952000  | 1.19073800  | 1.12169600  |
| P     | 2.38778000  | -0.66739300 | -0.68962300 | F | 0.77056600  | 0.21120400  | 1.93288500  |
| C     | 1.74206500  | -0.91885100 | -2.36732600 | C | -2.81263700 | -0.43202700 | -0.27214500 |
| H     | 2.56052800  | -0.61687300 | -3.03388200 | C | -3.65220700 | -1.34058300 | -0.91622200 |
| H     | 1.63562300  | -2.00518700 | -2.46733200 | F | -3.13295900 | -2.30278700 | -1.69847600 |
| C     | 0.41787000  | -0.21807000 | -2.72815800 | C | -5.03534900 | -1.34412700 | -0.79927800 |
| H     | 0.49097700  | 0.85454600  | -2.52845600 | F | -5.77609500 | -2.23974000 | -1.45675800 |
| H     | 0.34220600  | -0.31262400 | -3.81840200 | C | -5.65121900 | -0.40796100 | 0.01757800  |
| C     | -0.84519400 | -0.79368000 | -2.07665000 | F | -6.97807900 | -0.39125300 | 0.14605500  |
| H     | -0.88856300 | -1.86218800 | -2.31615800 | C | -4.86521400 | 0.49974200  | 0.70692900  |
| H     | -1.67656300 | -0.35818100 | -2.64018700 | F | -5.43853100 | 1.39526900  | 1.51495400  |
| B     | -1.16770100 | -0.55010000 | -0.45883600 | C | -3.48244100 | 0.46329200  | 0.55713700  |
| C     | 3.70992400  | -1.84115400 | -0.35750600 | F | -2.80703000 | 1.35571300  | 1.30821500  |
| C     | 3.48907800  | -2.86780400 | 0.56512300  | H | 1.40871000  | -0.96084700 | 0.26072400  |
| H     | 2.53490700  | -2.95050700 | 1.08078200  | C | 0.13200600  | -4.08435800 | 0.85455300  |
| C     | 4.50132500  | -3.79294600 | 0.80817500  | C | -0.14765600 | -2.99280800 | 0.02528600  |
| H     | 4.33677800  | -4.59058400 | 1.52448300  | C | -0.75090100 | -1.81982200 | 0.49944200  |
| C     | 5.71638100  | -3.69153700 | 0.13758100  | C | -1.08183500 | -1.81184100 | 1.86749500  |
| H     | 6.50146200  | -4.41550400 | 0.33006800  | C | -0.80072400 | -2.87945000 | 2.70954100  |
| C     | 5.93516200  | -2.66188000 | -0.77794000 | C | -0.18507200 | -4.02735800 | 2.20568100  |
| H     | 6.88693100  | -2.58264100 | -1.29215200 | H | 0.59027000  | -4.97743700 | 0.43698600  |
| C     | 4.93401000  | -1.73199300 | -1.02659300 | H | 0.09725800  | -3.08063300 | -1.03171700 |
| H     | 5.10739600  | -0.91800100 | -1.72632200 | H | -1.57043100 | -0.93046200 | 2.28016800  |
|       |             |             |             | H | -1.06852600 | -2.82578100 | 3.76082300  |

|        |             |             |             |       |             |             |             |
|--------|-------------|-------------|-------------|-------|-------------|-------------|-------------|
| H      | 0.02514800  | -4.86979100 | 2.85785200  | C     | -2.34356200 | 4.29666300  | -0.36601700 |
|        |             |             |             | F     | -2.75645700 | 5.56168700  | -0.34652600 |
| P13_TS |             |             |             | C     | -3.20087900 | 3.28044200  | -0.76137500 |
| P      | 2.66853400  | 0.14252300  | -0.67532000 | F     | -4.44633200 | 3.57525600  | -1.13158400 |
| B      | -0.95161600 | 0.02331100  | -0.51780000 | C     | -2.75119100 | 1.96576500  | -0.77590200 |
| C      | 2.93041600  | 0.91096800  | -2.33321000 | F     | -3.64119100 | 1.05657700  | -1.19535300 |
| H      | 3.05800900  | 1.97531800  | -2.10486900 | C     | -2.15018000 | -1.05874400 | -0.20890400 |
| H      | 3.88193600  | 0.54892700  | -2.73962400 | C     | -3.09700200 | -0.84327500 | 0.79189600  |
| C      | 1.76444800  | 0.75609600  | -3.32465900 | F     | -3.09881600 | 0.31265700  | 1.47569400  |
| H      | 1.95158300  | 1.46074200  | -4.14214200 | C     | -4.06588700 | -1.76572800 | 1.15835500  |
| H      | 1.75580000  | -0.24234500 | -3.77521200 | F     | -4.94959700 | -1.48535800 | 2.11735900  |
| C      | 0.41008100  | 1.04110400  | -2.66480300 | C     | -4.10430100 | -2.99909200 | 0.52422700  |
| H      | -0.28162100 | 1.43298400  | -3.41699400 | F     | -5.02242200 | -3.90287100 | 0.86151400  |
| H      | 0.56533800  | 1.86616500  | -1.96231800 | C     | -3.16651100 | -3.28020600 | -0.45562600 |
| C      | -0.23786100 | -0.18905000 | -1.98082500 | F     | -3.16995200 | -4.47176400 | -1.05719300 |
| H      | 0.49176100  | -1.01466300 | -1.93277300 | C     | -2.21777000 | -2.32095100 | -0.79114200 |
| H      | -0.99999500 | -0.57637400 | -2.66468300 | F     | -1.30540100 | -2.71125300 | -1.70263700 |
| C      | 3.89541000  | 0.93113900  | 0.41532800  | H     | 1.07582100  | 0.07942500  | 0.08541200  |
| C      | 3.45472800  | 1.75463800  | 1.45439100  | C     | 0.40920900  | -1.72217900 | 3.36458400  |
| H      | 2.39165100  | 1.90465700  | 1.61330500  | C     | 0.09419300  | -0.36626400 | 3.32136400  |
| C      | 4.38271300  | 2.38410000  | 2.28209500  | C     | -0.05725500 | 0.27396200  | 2.09691900  |
| H      | 4.03819400  | 3.02351600  | 3.08799300  | C     | 0.09027200  | -0.41497600 | 0.87266400  |
| C      | 5.74457000  | 2.19154700  | 2.07653900  | C     | 0.41557800  | -1.79466100 | 0.96220000  |
| H      | 6.46508400  | 2.68266000  | 2.72277900  | C     | 0.57442100  | -2.43931100 | 2.17703400  |
| C      | 6.18813400  | 1.36327600  | 1.04569600  | H     | 0.52309800  | -2.22226500 | 4.32163900  |
| H      | 7.25083400  | 1.20865600  | 0.88973700  | H     | -0.04289300 | 0.18791700  | 4.24440900  |
| C      | 5.26779600  | 0.73127600  | 0.21898700  | H     | -0.31871500 | 1.32718100  | 2.08923600  |
| H      | 5.61092100  | 0.06982200  | -0.57266100 | H     | 0.52521200  | -2.36357800 | 0.03916100  |
| C      | 3.23384200  | -1.58177500 | -0.79156800 | H     | 0.81890300  | -3.49664400 | 2.20497600  |
| C      | 3.58905800  | -2.25872000 | 0.38273600  |       |             |             |             |
| H      | 3.60244200  | -1.72765300 | 1.33109200  | P13_P |             |             |             |
| C      | 3.92284400  | -3.60778400 | 0.33821500  | P     | 2.78294700  | -0.23179200 | -0.47820700 |
| H      | 4.19808800  | -4.12416800 | 1.25215200  | B     | -1.13386400 | -0.17942300 | -0.32256500 |
| C      | 3.90216900  | -4.29433800 | -0.87397400 | C     | 2.59099700  | 0.87375600  | -1.90243800 |
| H      | 4.15973300  | -5.34798000 | -0.90561000 | H     | 2.19095200  | 1.81718000  | -1.51735200 |
| C      | 3.55145200  | -3.62773400 | -2.04427800 | H     | 3.60675600  | 1.05704600  | -2.27330200 |
| H      | 3.53593600  | -4.15808700 | -2.99062500 | C     | 1.70404400  | 0.28352900  | -3.01373100 |
| C      | 3.21665000  | -2.27707100 | -2.00460600 | H     | 1.94243400  | 0.85075500  | -3.91970200 |
| H      | 2.94104900  | -1.76845600 | -2.92293400 | H     | 2.00589000  | -0.75273100 | -3.21738000 |
| C      | -1.46739300 | 1.57681800  | -0.39245200 | C     | 0.19078200  | 0.36171700  | -2.76956800 |
| C      | -0.65065300 | 2.64332400  | -0.03796300 | H     | -0.26755200 | 0.22035000  | -3.75407400 |
| F      | 0.65273700  | 2.42506400  | 0.27866600  | H     | -0.04821400 | 1.39557000  | -2.49437000 |
| C      | -1.04674600 | 3.97346800  | -0.00253000 | C     | -0.44516400 | -0.66066300 | -1.78472400 |
| F      | -0.19066400 | 4.93150400  | 0.35861300  | H     | 0.26788700  | -1.48872300 | -1.63408900 |

|   |             |             |             |        |             |             |             |
|---|-------------|-------------|-------------|--------|-------------|-------------|-------------|
| H | -1.24996600 | -1.13759700 | -2.34702000 | F      | -1.99284600 | -2.90875000 | -1.18601700 |
| C | 3.64225400  | 0.56528300  | 0.87844000  | H      | 1.54228100  | -0.64448700 | 0.02065200  |
| C | 3.23187900  | 0.22867100  | 2.17105900  | C      | 0.54565300  | -1.87400500 | 3.48033000  |
| H | 2.41195700  | -0.46880500 | 2.32702200  | C      | 0.03656600  | -0.57603100 | 3.45198100  |
| C | 3.87095200  | 0.81197200  | 3.25915600  | C      | -0.42506200 | -0.02737700 | 2.25740500  |
| H | 3.54875700  | 0.56077900  | 4.26413300  | C      | -0.41499200 | -0.74527300 | 1.04928300  |
| C | 4.90568200  | 1.72189100  | 3.05592300  | C      | 0.06936000  | -2.06439900 | 1.12070300  |
| H | 5.39779200  | 2.17981100  | 3.90773900  | C      | 0.55886200  | -2.62017000 | 2.30319900  |
| C | 5.30552900  | 2.06050500  | 1.76456500  | H      | 0.90977400  | -2.30364000 | 4.40870300  |
| H | 6.10131900  | 2.78129900  | 1.61158300  | H      | -0.00083200 | 0.01166200  | 4.36529800  |
| C | 4.67152900  | 1.48615000  | 0.66795900  | H      | -0.83067400 | 0.98169300  | 2.26454200  |
| H | 4.96882200  | 1.76939800  | -0.33840000 | H      | 0.01768000  | -2.68847700 | 0.22891300  |
| C | 3.66718000  | -1.71348300 | -0.99985800 | H      | 0.92537200  | -3.64309100 | 2.31099000  |
| C | 5.04974600  | -1.66435600 | -1.20566000 |        |             |             |             |
| H | 5.60331900  | -0.75115500 | -1.00133700 | P14_TS |             |             |             |
| C | 5.71892500  | -2.79756900 | -1.65047700 | P      | 2.83409100  | -0.76295700 | -0.30114300 |
| H | 6.79135900  | -2.76446500 | -1.80929400 | B      | -0.58575600 | -0.20885700 | -0.41671200 |
| C | 5.01223500  | -3.97676700 | -1.88289300 | C      | 2.47138200  | 0.41291800  | -1.67554400 |
| H | 5.53846800  | -4.86099900 | -2.22747700 | H      | 2.32316100  | 1.36613300  | -1.16037400 |
| C | 3.63826400  | -4.02880900 | -1.66730000 | H      | 3.34849900  | 0.54478000  | -2.32071400 |
| H | 3.09213700  | -4.94949500 | -1.84129300 | C      | 1.21059200  | 0.10605500  | -2.51777300 |
| C | 2.95934400  | -2.89744700 | -1.22338900 | H      | 1.51944500  | -0.44535300 | -3.41401400 |
| H | 1.88885400  | -2.93577700 | -1.04483100 | H      | 0.84892400  | 1.07208000  | -2.88878400 |
| C | -1.20563500 | 1.46728900  | -0.35964000 | C      | 0.02394900  | -0.64877000 | -1.87610000 |
| C | -0.12725100 | 2.26887100  | -0.00812700 | H      | 0.25320300  | -1.71689400 | -1.88507500 |
| F | 1.00241700  | 1.71732500  | 0.51471100  | H      | -0.79161300 | -0.55442500 | -2.59951400 |
| C | -0.05370500 | 3.64245600  | -0.20267900 | C      | 3.54370900  | -2.35276400 | -1.04911500 |
| F | 1.05051100  | 4.31800100  | 0.13455300  | C      | 4.72964100  | -2.13053100 | -1.99846000 |
| C | -1.12784100 | 4.29833700  | -0.77956200 | H      | 4.95902400  | -3.08114200 | -2.49365200 |
| F | -1.09116600 | 5.61495000  | -0.98052000 | H      | 5.63558400  | -1.79848300 | -1.49721800 |
| C | -2.23511100 | 3.55361700  | -1.16139600 | H      | 4.48045900  | -1.40903100 | -2.78312200 |
| F | -3.27144800 | 4.16435300  | -1.73593400 | C      | 3.90797000  | -3.30665500 | 0.09881500  |
| C | -2.24477800 | 2.17841500  | -0.96038100 | H      | 3.03967400  | -3.49216400 | 0.74113600  |
| F | -3.32910700 | 1.53843000  | -1.41660300 | H      | 4.72337500  | -2.93987400 | 0.72468700  |
| C | -2.63066000 | -0.86929500 | -0.12636500 | H      | 4.22384400  | -4.26750600 | -0.32316300 |
| C | -3.64336300 | -0.28549500 | 0.63232600  | C      | 2.44811100  | -3.04430100 | -1.87498500 |
| F | -3.47184000 | 0.93826300  | 1.16331900  | H      | 2.12526800  | -2.43984300 | -2.72564900 |
| C | -4.86208500 | -0.89078600 | 0.90623900  | H      | 1.57942600  | -3.29591200 | -1.26687700 |
| F | -5.79111600 | -0.25924600 | 1.62808800  | H      | 2.85856900  | -3.98093500 | -2.26850700 |
| C | -5.10608200 | -2.17400200 | 0.44047700  | C      | 4.15328000  | 0.06924200  | 0.79908300  |
| F | -6.26655000 | -2.77898600 | 0.69703600  | C      | 4.04877600  | 1.60091000  | 0.71263100  |
| C | -4.11824900 | -2.82157900 | -0.28238300 | H      | 3.06767700  | 1.98514200  | 0.97879400  |
| F | -4.31805200 | -4.07011000 | -0.71486200 | H      | 4.32182500  | 1.96698100  | -0.28111600 |
| C | -2.91591600 | -2.16998500 | -0.53141700 | H      | 4.76355800  | 2.02504600  | 1.42654100  |

|       |             |             |             |   |             |             |             |
|-------|-------------|-------------|-------------|---|-------------|-------------|-------------|
| C     | 5.61213900  | -0.26403300 | 0.45708700  | P | 3.08401000  | -0.63742900 | -0.45329400 |
| H     | 6.25151100  | 0.27305300  | 1.16710000  | B | -0.79536600 | -0.19072600 | -0.25720900 |
| H     | 5.88256000  | 0.07618200  | -0.54626900 | C | 2.36156000  | 0.53143900  | -1.65152100 |
| H     | 5.85157100  | -1.32382900 | 0.54824200  | H | 2.23398400  | 1.43128800  | -1.04685500 |
| C     | 3.85367300  | -0.38492300 | 2.23779000  | H | 3.14572000  | 0.76463800  | -2.38273100 |
| H     | 3.93923500  | -1.47043400 | 2.34834500  | C | 1.02964800  | 0.20653300  | -2.38102100 |
| H     | 2.84813900  | -0.09018400 | 2.54583700  | H | 1.28768600  | -0.27767500 | -3.33050600 |
| H     | 4.57295600  | 0.07848100  | 2.92274600  | H | 0.63917500  | 1.19379000  | -2.65653800 |
| C     | -0.27399000 | 1.38386400  | -0.18319600 | C | -0.10611300 | -0.60216500 | -1.71669400 |
| C     | 0.52236200  | 2.01107700  | 0.75989900  | H | 0.17420800  | -1.65858400 | -1.71201700 |
| F     | 1.20144400  | 1.28442300  | 1.67901200  | H | -0.90999200 | -0.55392800 | -2.46226600 |
| C     | 0.73641600  | 3.38256400  | 0.82854400  | C | 3.66295700  | -2.23754300 | -1.20536900 |
| F     | 1.54983100  | 3.88945300  | 1.75814600  | C | 4.79805400  | -2.03027700 | -2.21672200 |
| C     | 0.12175300  | 4.21336500  | -0.09244100 | H | 4.98120800  | -2.98396300 | -2.72178300 |
| F     | 0.31256900  | 5.52923400  | -0.05217500 | H | 5.73372100  | -1.71612000 | -1.75656500 |
| C     | -0.68901500 | 3.64492500  | -1.06543400 | H | 4.52146200  | -1.30269600 | -2.98717100 |
| F     | -1.28379000 | 4.42275200  | -1.96796300 | C | 4.06105600  | -3.19369200 | -0.06848100 |
| C     | -0.86239600 | 2.26782000  | -1.09087200 | H | 3.23179300  | -3.33088200 | 0.63478200  |
| F     | -1.63759000 | 1.79062100  | -2.07683700 | H | 4.94002100  | -2.86752800 | 0.49010300  |
| C     | -2.20666700 | -0.45258500 | -0.29271200 | H | 4.29381400  | -4.16984000 | -0.50687600 |
| C     | -2.89735600 | -1.42902400 | -1.00580100 | C | 2.47158800  | -2.87100200 | -1.94211900 |
| F     | -2.24673400 | -2.24402500 | -1.85614400 | H | 2.11620200  | -2.25529400 | -2.77144100 |
| C     | -4.26063900 | -1.66369300 | -0.87656500 | H | 1.64056200  | -3.06917300 | -1.26318200 |
| F     | -4.85887500 | -2.61121900 | -1.60058100 | H | 2.80804100  | -3.82840900 | -2.35369300 |
| C     | -5.00048000 | -0.91013000 | 0.02173800  | C | 4.37005000  | 0.23332800  | 0.61641500  |
| F     | -6.30786100 | -1.11933100 | 0.16248700  | C | 4.29465200  | 1.76187500  | 0.45344800  |
| C     | -4.35624500 | 0.05194900  | 0.78401300  | H | 3.34116900  | 2.18528500  | 0.76125100  |
| F     | -5.04689100 | 0.76806100  | 1.67237900  | H | 4.51252900  | 2.07112100  | -0.57341200 |
| C     | -2.99167700 | 0.25079900  | 0.61927000  | H | 5.06966200  | 2.19363400  | 1.09494700  |
| F     | -2.43390400 | 1.16511100  | 1.43243600  | C | 5.81325000  | -0.16826600 | 0.27646300  |
| H     | 1.15245900  | -0.98998200 | 0.43329300  | H | 6.47125600  | 0.35511000  | 0.97731800  |
| C     | -0.64793700 | -3.64185800 | 1.50408700  | H | 6.09725500  | 0.14564400  | -0.73183300 |
| C     | -0.82889200 | -3.26178200 | 2.83463900  | H | 6.00967200  | -1.23477700 | 0.38541300  |
| C     | -0.65325900 | -1.93014300 | 3.19854500  | C | 4.03640600  | -0.16311200 | 2.06531800  |
| C     | -0.27587900 | -0.98840200 | 2.24890100  | H | 4.10205800  | -1.24571900 | 2.21781500  |
| C     | -0.06508800 | -1.32918300 | 0.89047300  | H | 3.02903300  | 0.15688500  | 2.34615000  |
| C     | -0.28336200 | -2.69365500 | 0.56347100  | H | 4.75548800  | 0.31757500  | 2.73667600  |
| H     | -0.81365400 | -4.67135100 | 1.20298200  | C | -0.67046800 | 1.45267800  | -0.14417100 |
| H     | -1.12122100 | -3.99770100 | 3.57769500  | C | 0.39743000  | 2.11242300  | 0.44536600  |
| H     | -0.81658700 | -1.62193700 | 4.22629600  | F | 1.39544300  | 1.40593800  | 1.04704600  |
| H     | -0.16786100 | 0.03848300  | 2.56834700  | C | 0.59520300  | 3.48805200  | 0.43984900  |
| H     | -0.22062100 | -3.00480300 | -0.47407000 | F | 1.68079400  | 4.01878800  | 1.01831500  |
|       |             |             |             | C | -0.32595700 | 4.29758400  | -0.20041300 |
| P14_P |             |             |             | F | -0.16343200 | 5.61886800  | -0.23532300 |

|        |             |             |             |   |             |             |             |
|--------|-------------|-------------|-------------|---|-------------|-------------|-------------|
| C      | -1.41524200 | 3.69998100  | -0.82140100 | F | 2.71286600  | 3.79527800  | -2.04210700 |
| F      | -2.30510900 | 4.46057000  | -1.45794800 | C | 3.15977300  | 3.51084800  | 0.25041600  |
| C      | -1.55671800 | 2.31819400  | -0.78929400 | F | 3.67680200  | 4.72604500  | 0.31596700  |
| F      | -2.61776800 | 1.83047400  | -1.44419200 | C | 3.13135800  | 2.70598000  | 1.38216000  |
| C      | -2.37975800 | -0.67211000 | -0.21564700 | F | 3.61226100  | 3.15810400  | 2.53211600  |
| C      | -2.85974300 | -1.80967800 | -0.85521200 | C | 2.58500300  | 1.43529500  | 1.29414200  |
| F      | -2.04997200 | -2.55749000 | -1.63582400 | F | 2.56253400  | 0.68966400  | 2.39591400  |
| C      | -4.16246900 | -2.28084000 | -0.73329400 | C | 2.46971000  | -1.90849200 | -0.09751700 |
| F      | -4.55251400 | -3.38108500 | -1.38301900 | C | 3.52756000  | -1.73242600 | -0.98927300 |
| C      | -5.05683700 | -1.60656100 | 0.08085200  | F | 3.63324300  | -0.61324900 | -1.70538500 |
| F      | -6.31146800 | -2.03806000 | 0.21516500  | C | 4.49305900  | -2.70922600 | -1.18574700 |
| C      | -4.62474100 | -0.47917600 | 0.76431400  | F | 5.48451100  | -2.51479900 | -2.04574000 |
| F      | -5.46980500 | 0.17327100  | 1.56571200  | C | 4.41244700  | -3.90227800 | -0.47764600 |
| C      | -3.31304600 | -0.05354900 | 0.61340000  | F | 5.32693000  | -4.84137600 | -0.65956400 |
| F      | -2.96059900 | 1.02693600  | 1.33431800  | C | 3.36988400  | -4.11312600 | 0.41542000  |
| H      | 2.05136200  | -1.01966100 | 0.41694700  | F | 3.29271700  | -5.25241700 | 1.09110500  |
| C      | 0.60886400  | -3.15172800 | 1.94822200  | C | 2.42144000  | -3.11637700 | 0.59590400  |
| C      | 0.84005200  | -2.56222200 | 3.18975200  | F | 1.43506700  | -3.34323800 | 1.46516600  |
| C      | 0.48915900  | -1.22696700 | 3.37497500  | C | -1.25662900 | 1.36336800  | 0.14925500  |
| C      | -0.02732600 | -0.48045000 | 2.31689000  | C | -1.69321700 | 2.11163800  | -0.94771800 |
| C      | -0.18877500 | -1.01634800 | 1.02924200  | F | -2.41831600 | 1.52776300  | -1.91199000 |
| C      | 0.09066600  | -2.38972500 | 0.90138000  | C | -1.41696400 | 3.45864100  | -1.13982400 |
| H      | 0.81230500  | -4.20953800 | 1.79955500  | F | -1.86221200 | 4.09477200  | -2.21965700 |
| H      | 1.24808900  | -3.14442300 | 4.01037300  | C | -0.66823800 | 4.14354000  | -0.19262100 |
| H      | 0.61266300  | -0.76509700 | 4.35079300  | F | -0.37441500 | 5.42815000  | -0.35874400 |
| H      | -0.31047500 | 0.55367300  | 2.49697300  | C | -0.22168100 | 3.45902500  | 0.92456600  |
| H      | -0.13353500 | -2.88422000 | -0.04215300 | F | 0.52480400  | 4.08728200  | 1.83745400  |
| P15_TS |             |             |             | C | -0.52375200 | 2.10922600  | 1.06860500  |
| P      | 1.17736600  | -0.65888300 | 0.21635700  | F | 0.02859400  | 1.52609800  | 2.15656900  |
| B      | -1.50399500 | -0.27029400 | 0.14317100  | C | -3.01873100 | -0.67382000 | -0.31282200 |
| C      | -0.31036900 | -0.93649300 | -0.81426200 | C | -4.11641800 | 0.10535000  | 0.04939300  |
| H      | -0.36180300 | -2.02975800 | -0.69443900 | F | -3.93472300 | 1.24612000  | 0.73432100  |
| C      | -0.37672900 | -0.65863000 | -2.31629700 | C | -5.43209300 | -0.22716100 | -0.24096000 |
| H      | -0.31776700 | 0.41251100  | -2.51481400 | F | -6.43358900 | 0.56851400  | 0.13193200  |
| H      | -1.37723400 | -0.97023300 | -2.63503500 | C | -5.70212000 | -1.40917900 | -0.91516700 |
| C      | 0.66769600  | -1.40762400 | -3.13810400 | F | -6.95522800 | -1.75351100 | -1.19765400 |
| H      | 1.67743400  | -1.04508600 | -2.92913800 | C | -4.64923100 | -2.23439900 | -1.27774300 |
| H      | 0.48853500  | -1.27562400 | -4.20815100 | F | -4.89061200 | -3.38354900 | -1.90875700 |
| H      | 0.63376000  | -2.48184800 | -2.92431400 | C | -3.34873600 | -1.85827100 | -0.96418100 |
| C      | 2.04928000  | 0.93647000  | 0.10498200  | F | -2.39011700 | -2.73828500 | -1.32049700 |
| C      | 2.12853200  | 1.75464500  | -1.01830000 | H | -0.00767900 | -0.77851100 | 1.47469300  |
| F      | 1.69614700  | 1.32948000  | -2.20123100 | C | -1.92746500 | -0.28390100 | 2.81456600  |
| C      | 2.66408300  | 3.03285400  | -0.95674100 | C | -2.44839600 | -0.94074000 | 3.91950100  |
|        |             |             |             | C | -2.42820300 | -2.33305200 | 3.97627900  |

|       |             |             |             |        |             |             |             |
|-------|-------------|-------------|-------------|--------|-------------|-------------|-------------|
| C     | -1.90284000 | -3.06767000 | 2.91343400  | C      | -1.67000900 | 1.98819400  | -0.95242300 |
| C     | -1.40070000 | -2.40410000 | 1.80666600  | F      | -2.31840800 | 1.38742800  | -1.96044600 |
| C     | -1.37488200 | -0.98648300 | 1.71456200  | C      | -1.37786500 | 3.33274100  | -1.14738100 |
| H     | -1.98239700 | 0.79757200  | 2.78246000  | F      | -1.72433200 | 3.94990000  | -2.27436900 |
| H     | -2.87654100 | -0.37002000 | 4.73693200  | C      | -0.71178100 | 4.03357300  | -0.15163500 |
| H     | -2.82886500 | -2.84641000 | 4.84517400  | F      | -0.36939400 | 5.30652000  | -0.32825600 |
| H     | -1.89562600 | -4.15187000 | 2.94878700  | C      | -0.34926300 | 3.36907800  | 1.00835800  |
| H     | -1.01228400 | -2.99820300 | 0.98411000  | F      | 0.36516600  | 4.00888200  | 1.94147400  |
| P15_P |             |             |             | C      | -0.64388500 | 2.01769900  | 1.14382100  |
| P     | 1.24812500  | -0.66651800 | 0.22878200  | F      | -0.10182000 | 1.42749900  | 2.23022100  |
| B     | -1.57715400 | -0.36621300 | 0.32717700  | C      | -3.02382700 | -0.84038500 | -0.30586600 |
| C     | -0.32080800 | -1.12651000 | -0.53286800 | C      | -4.15497300 | -0.02576400 | -0.30644900 |
| H     | -0.31388500 | -2.18957600 | -0.24419100 | F      | -4.07628800 | 1.25419500  | 0.09615500  |
| C     | -0.42643000 | -1.06366100 | -2.06379500 | C      | -5.41812900 | -0.45208800 | -0.69536000 |
| H     | -0.55549000 | -0.03189600 | -2.38985400 | F      | -6.45236400 | 0.38857600  | -0.68087900 |
| H     | -1.36636900 | -1.57048700 | -2.29512600 | C      | -5.60568000 | -1.76793600 | -1.09010800 |
| C     | 0.70159900  | -1.72955900 | -2.84744400 | F      | -6.80932300 | -2.19646200 | -1.46337600 |
| H     | 1.62853900  | -1.15053900 | -2.80093700 | C      | -4.52154500 | -2.63085000 | -1.08274500 |
| H     | 0.43257500  | -1.81008100 | -3.90340000 | F      | -4.67805900 | -3.90506300 | -1.44434100 |
| H     | 0.90085100  | -2.74224300 | -2.47868300 | C      | -3.27958200 | -2.15568800 | -0.68270000 |
| C     | 1.93399000  | 0.99903000  | 0.06996400  | F      | -2.28482200 | -3.07019700 | -0.67950600 |
| C     | 1.81574100  | 1.77891600  | -1.07623400 | H      | 1.05339100  | -0.80005900 | 1.60597300  |
| F     | 1.27974600  | 1.26932200  | -2.18034100 | C      | -2.43534800 | -0.09992300 | 2.78913900  |
| C     | 2.24365600  | 3.09673600  | -1.10314100 | C      | -2.64749300 | -0.51404900 | 4.09709100  |
| F     | 2.08423200  | 3.83261900  | -2.19228400 | C      | -2.10469700 | -1.71764600 | 4.54795600  |
| C     | 2.81335700  | 3.65289100  | 0.03733300  | C      | -1.36957800 | -2.49963900 | 3.66711000  |
| F     | 3.21452300  | 4.90957900  | 0.02307600  | C      | -1.17108800 | -2.07370500 | 2.35198400  |
| C     | 2.96846100  | 2.88961600  | 1.18849400  | C      | -1.67678800 | -0.85659000 | 1.87940800  |
| F     | 3.51381200  | 3.42243300  | 2.26986500  | H      | -2.87773600 | 0.83672600  | 2.45335900  |
| C     | 2.52744400  | 1.57541700  | 1.19393400  | H      | -3.23928500 | 0.10045900  | 4.76913000  |
| F     | 2.67618200  | 0.86180700  | 2.30620400  | H      | -2.26491200 | -2.04384800 | 5.57076300  |
| C     | 2.62447400  | -1.80572100 | -0.10990800 | H      | -0.95579700 | -3.44895300 | 3.99505200  |
| C     | 3.62169600  | -1.55785800 | -1.05167400 | H      | -0.62487100 | -2.73866800 | 1.68635800  |
| F     | 3.60973600  | -0.43535400 | -1.76995600 | P16_TS |             |             |             |
| C     | 4.63628900  | -2.47180000 | -1.29356800 | C      | -0.58050200 | -1.29887700 | -3.15576900 |
| F     | 5.57094400  | -2.21619400 | -2.19668100 | H      | -1.58737200 | -1.15675700 | -2.76800200 |
| C     | 4.66513700  | -3.66560500 | -0.58030500 | H      | -0.48396500 | -2.31341500 | -3.55683200 |
| F     | 5.62653500  | -4.54205400 | -0.80677000 | H      | -0.45001800 | -0.61096200 | -3.99767500 |
| C     | 3.68267800  | -3.94369600 | 0.36267900  | C      | 0.48031400  | -1.03754500 | -2.13698600 |
| F     | 3.71072000  | -5.08300100 | 1.03638900  | H      | 1.49987300  | -1.06627000 | -2.52585000 |
| C     | 2.67957200  | -3.01209800 | 0.58533700  | C      | 0.36303900  | -0.75281600 | -0.83500200 |
| F     | 1.74405800  | -3.29239000 | 1.49031900  | P      | -1.14991400 | -0.65740700 | 0.15434100  |
| C     | -1.31877700 | 1.26281000  | 0.18690800  | C      | -2.44841800 | -1.88749600 | -0.20845800 |

|   |             |             |             |       |             |             |             |
|---|-------------|-------------|-------------|-------|-------------|-------------|-------------|
| C | -3.48711900 | -1.68675000 | -1.11898600 | H     | -0.01646200 | -0.85626600 | 1.44365500  |
| F | -3.53814100 | -0.57578900 | -1.85552900 | C     | 2.29382400  | -1.41197800 | 3.91039300  |
| C | -4.48450400 | -2.62987100 | -1.31760300 | C     | 1.87582700  | -0.59873900 | 2.86870900  |
| F | -5.45179000 | -2.41408800 | -2.19971700 | C     | 1.33751800  | -1.13742000 | 1.67316000  |
| C | -4.46287700 | -3.81127500 | -0.58532100 | C     | 1.26045600  | -2.55255800 | 1.59695300  |
| F | -5.40849800 | -4.71825400 | -0.76814700 | C     | 1.66128200  | -3.37187200 | 2.63947200  |
| C | -3.44777000 | -4.04211500 | 0.33351500  | C     | 2.18024000  | -2.79841600 | 3.79996500  |
| F | -3.43085200 | -5.16694200 | 1.03682300  | H     | 2.71076900  | -0.97239300 | 4.81038900  |
| C | -2.46539300 | -3.07875100 | 0.51553600  | H     | 1.98920000  | 0.47586600  | 2.96295900  |
| F | -1.52178300 | -3.31922300 | 1.42426900  | H     | 0.86200700  | -2.99885500 | 0.68934100  |
| C | -1.98531000 | 0.95233400  | 0.01889900  | H     | 1.57627400  | -4.44994900 | 2.55236200  |
| C | -2.64241300 | 1.42673500  | 1.15410900  | H     | 2.49846900  | -3.43335400 | 4.62136800  |
| F | -2.77890000 | 0.63236000  | 2.21450300  |       |             |             |             |
| C | -3.14763000 | 2.71520500  | 1.22730400  | P16-P |             |             |             |
| F | -3.75659900 | 3.14532200  | 2.32351200  | C     | -0.51892100 | -1.46171100 | -3.00760800 |
| C | -2.99028300 | 3.56525600  | 0.13908600  | H     | -1.52635400 | -1.16341600 | -2.72297300 |
| F | -3.45177300 | 4.80344700  | 0.19707300  | H     | -0.51837700 | -2.52210100 | -3.28253100 |
| C | -2.35314300 | 3.11676000  | -1.01136500 | H     | -0.25955000 | -0.89999600 | -3.91017300 |
| F | -2.18748500 | 3.93968100  | -2.03918400 | C     | 0.51276700  | -1.19781600 | -1.95839400 |
| C | -1.86476000 | 1.81844000  | -1.06564200 | H     | 1.54101200  | -1.27924500 | -2.31283100 |
| F | -1.26173600 | 1.43450600  | -2.18682500 | C     | 0.39419700  | -0.85319100 | -0.66728300 |
| B | 1.54866500  | -0.27933100 | 0.20451600  | P     | -1.20193900 | -0.65337800 | 0.11334800  |
| C | 3.07111200  | -0.63201500 | -0.26325900 | C     | -2.53630400 | -1.83439000 | -0.24316100 |
| C | 4.15346800  | 0.21476500  | -0.02797000 | C     | -3.52372200 | -1.60120300 | -1.20079500 |
| F | 3.97305400  | 1.40445400  | 0.56600900  | F     | -3.49216800 | -0.49295300 | -1.94226100 |
| C | 5.46580400  | -0.09428800 | -0.36166300 | C     | -4.54520700 | -2.50861100 | -1.43324200 |
| F | 6.45015000  | 0.76845100  | -0.11234700 | F     | -5.46538600 | -2.26613300 | -2.35481300 |
| C | 5.75105000  | -1.31630200 | -0.95112300 | C     | -4.59908900 | -3.67981500 | -0.68420800 |
| F | 7.00051800  | -1.63448100 | -1.27697300 | F     | -5.56805500 | -4.55080600 | -0.89763000 |
| C | 4.71586700  | -2.20722400 | -1.18642400 | C     | -3.63583500 | -3.93786600 | 0.28311900  |
| F | 4.97127300  | -3.39350500 | -1.73888600 | F     | -3.69425200 | -5.05068300 | 0.99771000  |
| C | 3.41895300  | -1.85557900 | -0.83292700 | C     | -2.62247400 | -3.01376600 | 0.49618100  |
| F | 2.48396200  | -2.79624200 | -1.06239300 | F     | -1.72457900 | -3.27447700 | 1.43890800  |
| C | 1.26007500  | 1.34549300  | 0.33129100  | C     | -1.93241900 | 0.99609700  | 0.00386600  |
| C | 0.53150200  | 2.02759500  | 1.29950900  | C     | -2.56911000 | 1.51905100  | 1.12936100  |
| F | 0.01725700  | 1.38622500  | 2.37186500  | F     | -2.76128500 | 0.74672700  | 2.19569600  |
| C | 0.16806300  | 3.36766500  | 1.20286200  | C     | -3.00222700 | 2.83460500  | 1.17098800  |
| F | -0.58830500 | 3.93236300  | 2.14891000  | F     | -3.59233300 | 3.31970700  | 2.25128700  |
| C | 0.51663100  | 4.09192300  | 0.07712800  | C     | -2.78789200 | 3.65277600  | 0.06669400  |
| F | 0.12012200  | 5.35307600  | -0.06103700 | F     | -3.17120000 | 4.91476500  | 0.10178000  |
| C | 1.23827100  | 3.46281200  | -0.92993500 | C     | -2.16944200 | 3.15071500  | -1.07312500 |
| F | 1.56821400  | 4.13619200  | -2.02906400 | F     | -1.94303800 | 3.94416100  | -2.10888100 |
| C | 1.58397700  | 2.12842600  | -0.78172400 | C     | -1.75121000 | 1.82865900  | -1.09756500 |
| F | 2.24727900  | 1.57700100  | -1.80573100 | F     | -1.15382100 | 1.37619300  | -2.19476400 |

|        |             |             |             |   |             |             |             |
|--------|-------------|-------------|-------------|---|-------------|-------------|-------------|
| B      | 1.61974500  | -0.33148000 | 0.34443000  | H | -1.11634800 | -2.92410600 | 4.88965000  |
| C      | 3.08539300  | -0.74948400 | -0.26565600 | C | -1.58770400 | -1.43979000 | 3.40422100  |
| C      | 4.20011700  | 0.08594800  | -0.25943000 | H | -2.53168800 | -1.17684200 | 3.87639000  |
| F      | 4.09785500  | 1.36244000  | 0.14483900  | C | -1.20866700 | -0.76481400 | 2.23726000  |
| C      | 5.47190700  | -0.31992900 | -0.64446300 | C | -2.21798600 | 0.24770000  | 1.72306500  |
| F      | 6.49376600  | 0.53600600  | -0.62084000 | H | -1.78326600 | 1.24509200  | 1.63839100  |
| C      | 5.68009600  | -1.62995200 | -1.04732200 | H | -3.06179700 | 0.33061900  | 2.41527700  |
| F      | 6.89166300  | -2.03754600 | -1.41921400 | C | -4.04498900 | -1.57615400 | 0.20261100  |
| C      | 4.60963700  | -2.51045400 | -1.05150300 | C | -4.89034500 | -1.57985400 | -1.08696900 |
| F      | 4.78972700  | -3.77883500 | -1.42383500 | H | -4.23825100 | -1.84041500 | -1.93300600 |
| C      | 3.35771900  | -2.06048200 | -0.65264800 | H | -5.62002700 | -2.39555900 | -0.99650700 |
| F      | 2.37790100  | -2.98340600 | -0.65540300 | C | -5.60762500 | -0.26872100 | -1.41286600 |
| C      | 1.34332800  | 1.30230100  | 0.33676600  | H | -6.26150900 | 0.02584600  | -0.58326600 |
| C      | 0.63167200  | 2.00618300  | 1.30304100  | H | -6.26575900 | -0.43288100 | -2.27212400 |
| F      | 0.10560300  | 1.37875700  | 2.37491000  | C | -4.63143300 | 0.85948400  | -1.75251700 |
| C      | 0.28021200  | 3.34731300  | 1.18366800  | H | -5.18223600 | 1.74065600  | -2.10754500 |
| F      | -0.46920100 | 3.94079800  | 2.12022100  | H | -3.99633500 | 0.53244700  | -2.58836300 |
| C      | 0.60874200  | 4.04075500  | 0.03207200  | C | -3.72677500 | 1.31831400  | -0.59269600 |
| F      | 0.19332100  | 5.29435800  | -0.13367700 | C | -2.68364100 | 2.30779800  | -1.13165600 |
| C      | 1.29431900  | 3.38228500  | -0.98117700 | H | -2.09095300 | 1.86659600  | -1.93876800 |
| F      | 1.58481000  | 4.02426200  | -2.11077900 | H | -1.99411800 | 2.63952700  | -0.34780900 |
| C      | 1.63470200  | 2.04821800  | -0.80817600 | H | -3.19319700 | 3.19378900  | -1.52786400 |
| F      | 2.24582100  | 1.46031400  | -1.84435000 | C | -4.54712400 | 2.02610800  | 0.49396800  |
| H      | -0.98603200 | -0.82171300 | 1.48301100  | H | -3.90833300 | 2.38856600  | 1.30440000  |
| C      | 2.27124200  | -1.03211900 | 4.15537600  | H | -5.32053100 | 1.39179700  | 0.93089100  |
| C      | 2.20133400  | -0.40755500 | 2.91592300  | H | -5.04405000 | 2.89807900  | 0.05216600  |
| C      | 1.58803800  | -1.02083100 | 1.81332900  | C | -4.93122400 | -1.47931800 | 1.44866500  |
| C      | 1.07974300  | -2.31084300 | 2.00963600  | H | -4.33203300 | -1.57528600 | 2.35880400  |
| C      | 1.13079700  | -2.94526500 | 3.25071300  | H | -5.65024400 | -2.30709000 | 1.43994100  |
| C      | 1.72509500  | -2.30367900 | 4.33128500  | H | -5.49784200 | -0.54770100 | 1.50960500  |
| H      | 2.75089100  | -0.52829000 | 4.98931100  | C | -3.25580800 | -2.89386300 | 0.26962300  |
| H      | 2.63582700  | 0.58363700  | 2.79607400  | H | -2.65398900 | -3.04457500 | -0.63178800 |
| H      | 0.65503000  | -2.84644900 | 1.16257400  | H | -3.96059900 | -3.73004200 | 0.35210200  |
| H      | 0.71542600  | -3.94237400 | 3.36701700  | H | -2.58911300 | -2.92453300 | 1.13774800  |
| H      | 1.77289700  | -2.79048800 | 5.30043900  | C | 2.27700300  | -0.67723400 | 0.07732100  |
|        |             |             |             | C | 2.99642800  | -1.21242800 | -0.98797000 |
| P19_TS |             |             |             | F | 2.39438200  | -1.68205900 | -2.08918400 |
| B      | 0.65031400  | -0.41872800 | 0.21393100  | C | 4.38719700  | -1.29849500 | -1.00914200 |
| C      | 0.03498500  | -1.05262100 | 1.60921000  | F | 5.00940400  | -1.83328100 | -2.06114900 |
| C      | 0.80280500  | -2.05206700 | 2.23202200  | C | 5.12664300  | -0.81905100 | 0.05677200  |
| H      | 1.75723400  | -2.32198900 | 1.78878900  | F | 6.45524400  | -0.89628100 | 0.04848500  |
| C      | 0.41545700  | -2.73427300 | 3.38123300  | C | 4.46133700  | -0.25063800 | 1.13417900  |
| H      | 1.06428700  | -3.49603300 | 3.80209500  | F | 5.15501700  | 0.22870100  | 2.16662400  |
| C      | -0.79348200 | -2.42115700 | 3.98369300  | C | 3.07699600  | -0.18138600 | 1.11238300  |



|       |             |             |             |   |             |             |             |
|-------|-------------|-------------|-------------|---|-------------|-------------|-------------|
| F     | 2.49895000  | 0.40798600  | 2.16938500  | H | -6.06825000 | -2.38317700 | -0.32865900 |
| C     | 0.55838400  | 1.21295200  | 0.01655300  | C | -6.12934100 | -0.34067800 | -1.05370000 |
| C     | 0.38062900  | 2.12714000  | 1.05951000  | H | -6.71207700 | 0.05775900  | -0.21508100 |
| F     | 0.16975400  | 1.72107800  | 2.31801100  | H | -6.85863200 | -0.62623400 | -1.81752500 |
| C     | 0.41896400  | 3.50927000  | 0.89718200  | C | -5.21797000 | 0.74574100  | -1.63431800 |
| F     | 0.21331300  | 4.31614500  | 1.93741300  | H | -5.82037600 | 1.57932900  | -2.01644900 |
| C     | 0.70555700  | 4.04808500  | -0.34686500 | H | -4.67171500 | 0.33267100  | -2.49422300 |
| F     | 0.75517800  | 5.36526800  | -0.51933200 | C | -4.19336700 | 1.34021100  | -0.64545900 |
| C     | 0.98581800  | 3.18827900  | -1.39805500 | C | -3.22830000 | 2.26657100  | -1.40231200 |
| F     | 1.33513400  | 3.68036500  | -2.58617100 | H | -2.69616400 | 1.73635700  | -2.19464700 |
| C     | 0.94985300  | 1.81680100  | -1.18301300 | H | -2.49068100 | 2.72513500  | -0.73618400 |
| F     | 1.38107700  | 1.06768200  | -2.21084200 | H | -3.81099600 | 3.07446600  | -1.85763900 |
| H     | -1.18785300 | -0.83713000 | -0.61462000 | C | -4.87879100 | 2.15115300  | 0.46201700  |
| P     | -2.80220700 | -0.18531000 | 0.03932000  | H | -4.15491700 | 2.56016800  | 1.17201200  |
| C     | -0.33103700 | -0.92998500 | -2.46106800 | H | -5.62548500 | 1.58595000  | 1.02034900  |
| C     | -0.15033300 | -1.35301500 | -1.12091300 | H | -5.39012200 | 2.99935700  | -0.00526100 |
| C     | 0.00892300  | -2.74797700 | -0.92144100 | C | -5.11756900 | -1.12328600 | 1.86242600  |
| C     | 0.05653000  | -3.64000200 | -1.98125000 | H | -4.42314200 | -0.96519400 | 2.68909800  |
| C     | -0.08748000 | -3.17120500 | -3.28673500 | H | -5.73489100 | -1.99220900 | 2.11324500  |
| C     | -0.29931800 | -1.81324800 | -3.52621600 | H | -5.77955200 | -0.25928900 | 1.79344500  |
| H     | -0.57050900 | 0.11208100  | -2.65119800 | C | -3.57533700 | -2.73435900 | 0.71371900  |
| H     | 0.11290200  | -3.12430600 | 0.09195800  | H | -3.01122100 | -2.96864700 | -0.19257300 |
| H     | 0.20212000  | -4.69928500 | -1.79637000 | H | -4.28955400 | -3.54585900 | 0.89284800  |
| H     | -0.05561800 | -3.86824400 | -4.11893800 | H | -2.87789600 | -2.69536000 | 1.55329300  |
| H     | -0.44711900 | -1.45402600 | -4.53921200 | C | 2.37654900  | -0.98962600 | -0.07441600 |
|       |             |             |             | C | 2.91789800  | -1.66150700 | -1.16563100 |
| P19_P |             |             |             | F | 2.18403400  | -1.93273400 | -2.25275800 |
| B     | 0.84864900  | -0.37263400 | 0.04949800  | C | 4.24295200  | -2.08596400 | -1.22383300 |
| C     | 0.10055700  | -0.98575800 | 1.39331700  | F | 4.70164700  | -2.72955900 | -2.29983000 |
| C     | 0.67500700  | -2.05348600 | 2.10246200  | C | 5.09544500  | -1.82849900 | -0.16351900 |
| H     | 1.61093300  | -2.47150300 | 1.74510100  | F | 6.36672600  | -2.22597700 | -0.20650800 |
| C     | 0.11510200  | -2.60436800 | 3.25162100  | C | 4.61012800  | -1.14733300 | 0.94393400  |
| H     | 0.61343900  | -3.42838400 | 3.75311400  | F | 5.42154700  | -0.88411800 | 1.97085600  |
| C     | -1.05194200 | -2.06525200 | 3.77935900  | C | 3.28377100  | -0.74100200 | 0.95708000  |
| H     | -1.47162000 | -2.43754700 | 4.70829100  | F | 2.87763900  | -0.07256400 | 2.04932100  |
| C     | -1.66968900 | -1.02835400 | 3.09147800  | C | 1.13592000  | 1.26644600  | 0.09089900  |
| H     | -2.56728800 | -0.57359100 | 3.50543800  | C | 0.91820100  | 2.14859900  | 1.14720200  |
| C     | -1.14265200 | -0.53975600 | 1.89220800  | F | 0.32365200  | 1.74439100  | 2.28277900  |
| C     | -1.95099100 | 0.52529200  | 1.17991900  | C | 1.26299100  | 3.49762600  | 1.11952800  |
| H     | -1.32048400 | 1.16046300  | 0.54916400  | F | 0.99290500  | 4.28641500  | 2.16254700  |
| H     | -2.46962200 | 1.17181900  | 1.89664100  | C | 1.89532900  | 4.02157900  | 0.00531400  |
| C     | -4.37539400 | -1.42945800 | 0.55729500  | F | 2.22668500  | 5.31066600  | -0.04334900 |
| C     | -5.36314500 | -1.59688300 | -0.62557900 | C | 2.17211800  | 3.18257900  | -1.06465600 |
| H     | -4.80725700 | -1.98751000 | -1.48996300 | F | 2.79011800  | 3.66556700  | -2.14342500 |

|        |             |             |             |   |             |             |             |
|--------|-------------|-------------|-------------|---|-------------|-------------|-------------|
| C      | 1.80676500  | 1.84563900  | -0.99092200 | C | 0.67881900  | 1.97941900  | -0.53620700 |
| F      | 2.13760200  | 1.09413200  | -2.05344400 | F | -0.00860200 | 1.26719600  | -1.45581700 |
| H      | -2.61625600 | -0.64502300 | -1.10748700 | C | 0.36874000  | 3.33370600  | -0.48931900 |
| P      | -3.22587400 | -0.08776500 | 0.01824500  | F | -0.54208700 | 3.85383000  | -1.31474800 |
| C      | -0.53062000 | 0.07574500  | -2.24247500 | C | 1.03381600  | 4.15198200  | 0.40749700  |
| C      | -0.09001100 | -0.79095100 | -1.23287100 | F | 0.74632900  | 5.45133500  | 0.48012400  |
| C      | -0.54714300 | -2.11949300 | -1.32105100 | C | 2.02178900  | 3.60293000  | 1.21174000  |
| C      | -1.38892500 | -2.55715300 | -2.33971300 | C | 2.31193000  | 2.24968900  | 1.10699900  |
| C      | -1.82584100 | -1.66305800 | -3.32019900 | F | 3.32436700  | 1.80791400  | 1.86597000  |
| C      | -1.38083100 | -0.34482100 | -3.27019600 | F | 2.69247700  | 4.38152400  | 2.06170500  |
| H      | -0.21624600 | 1.11608200  | -2.23407600 | C | -2.62479900 | 1.29027800  | -0.30816900 |
| H      | -0.22895900 | -2.83058600 | -0.56013700 | C | -2.86343800 | 1.56750500  | -1.67154600 |
| H      | -1.70421100 | -3.59708700 | -2.37420600 | C | -2.64963900 | 0.55043600  | -2.76981400 |
| H      | -2.47980800 | -1.99627600 | -4.12045100 | C | -3.29758000 | 2.83978400  | -2.03661000 |
| H      | -1.69034900 | 0.36077600  | -4.03788500 | C | -3.45778000 | 3.85782100  | -1.10202900 |
| P20_TS |             |             |             | C | -3.86211500 | 5.24364900  | -1.52533200 |
| P      | -2.29623800 | -0.48059200 | 0.05893300  | C | -3.13241500 | 3.58351500  | 0.22340800  |
| C      | -2.43024800 | -0.91767900 | 1.83342500  | C | -2.70178200 | 2.32556700  | 0.64443700  |
| C      | -3.43693200 | -1.57275800 | 2.55117500  | C | -2.33145900 | 2.16389700  | 2.09769900  |
| C      | -3.15784100 | -2.08845700 | 3.82566300  | C | -3.78981500 | -1.33391000 | -0.61098300 |
| C      | -1.87912500 | -2.05263600 | 4.39391000  | C | -3.60620200 | -2.54426600 | -1.30424300 |
| C      | -0.84231000 | -1.44187700 | 3.68413600  | C | -2.23988000 | -3.15293700 | -1.44423600 |
| C      | -1.20797200 | -0.85153500 | 2.46965400  | C | -4.70832000 | -3.19956400 | -1.84750300 |
| O      | -0.16544000 | -0.31698600 | 1.81592400  | C | -5.99840100 | -2.69253600 | -1.71148300 |
| C      | 0.95586700  | -0.72244000 | 2.48962300  | C | -7.17612400 | -3.39302000 | -2.33586600 |
| C      | 0.62458200  | -1.34316400 | 3.70111000  | C | -6.16517600 | -1.51696000 | -0.98524400 |
| C      | 1.69764100  | -1.82199300 | 4.45862300  | C | -5.09144700 | -0.81951100 | -0.42572600 |
| C      | 2.97757000  | -1.68721100 | 3.92094600  | C | -5.41534800 | 0.43219700  | 0.35817200  |
| C      | 3.20729100  | -1.16323000 | 2.63586400  | H | -4.41932400 | -1.71743300 | 2.11127800  |
| C      | 2.16790600  | -0.68053900 | 1.83454100  | H | -3.95596600 | -2.58293300 | 4.36904600  |
| B      | 2.07641400  | -0.21215300 | 0.26348500  | H | -1.69912400 | -2.53284300 | 5.35025500  |
| C      | 3.50802100  | -0.45451800 | -0.50916100 | H | 1.54626700  | -2.30885900 | 5.41630700  |
| C      | 4.15046800  | 0.48145200  | -1.31851800 | H | 3.82550900  | -2.04779300 | 4.49458500  |
| F      | 3.62237100  | 1.69617100  | -1.53577700 | H | 4.22347400  | -1.16582200 | 2.25015700  |
| C      | 5.35116100  | 0.23807600  | -1.97849200 | H | -2.44183500 | 1.06776400  | -3.70882600 |
| F      | 5.91030700  | 1.18181200  | -2.73715600 | H | -1.79033100 | -0.09733400 | -2.56078900 |
| C      | 5.96334200  | -0.99825300 | -1.85639600 | H | -3.52635600 | -0.08758400 | -2.91942300 |
| F      | 7.11086300  | -1.25025700 | -2.48310000 | H | -3.48655600 | 3.04581100  | -3.08789300 |
| C      | 5.35806500  | -1.97399200 | -1.07931000 | H | -4.40954400 | 5.75902000  | -0.73273100 |
| C      | 4.16018200  | -1.68726700 | -0.43897600 | H | -2.96963100 | 5.83634600  | -1.75260400 |
| F      | 3.62931900  | -2.69676400 | 0.27212900  | H | -4.48577200 | 5.22212600  | -2.42195700 |
| F      | 5.92492500  | -3.17625100 | -0.96137400 | H | -3.19983100 | 4.38089500  | 0.95992400  |
| C      | 1.64206700  | 1.37009000  | 0.25459200  | H | -2.36566900 | 3.13510000  | 2.59492100  |
|        |             |             |             | H | -1.31640800 | 1.76999900  | 2.20201800  |

|       |             |             |             |   |             |             |             |
|-------|-------------|-------------|-------------|---|-------------|-------------|-------------|
| H     | -3.00986900 | 1.49053400  | 2.63026500  | F | 4.27535500  | 1.46189100  | -1.52539400 |
| H     | -2.27576800 | -4.08681400 | -2.01013900 | C | 6.01540800  | -0.05256200 | -1.64528300 |
| H     | -1.80851000 | -3.37593400 | -0.46307200 | F | 6.70637500  | 0.83662000  | -2.36362400 |
| H     | -1.54514200 | -2.47864800 | -1.95550300 | C | 6.56777800  | -1.29395000 | -1.37297300 |
| H     | -4.55358600 | -4.13362400 | -2.38250600 | F | 7.78764000  | -1.60381300 | -1.81412200 |
| H     | -8.09929000 | -3.17752900 | -1.79318400 | C | 5.82932700  | -2.21284200 | -0.64342600 |
| H     | -7.02944000 | -4.47554800 | -2.35170100 | C | 4.55893600  | -1.86654400 | -0.20133500 |
| H     | -7.31570200 | -3.06363200 | -3.37071800 | F | 3.88934900  | -2.82408000 | 0.46264500  |
| H     | -7.16892800 | -1.12422300 | -0.83884800 | F | 6.33820200  | -3.42095600 | -0.38663500 |
| H     | -6.45767800 | 0.39798800  | 0.68305900  | C | 1.99959600  | 1.23551700  | 0.09162700  |
| H     | -4.78855600 | 0.54034000  | 1.24702800  | C | 0.79362600  | 1.78014100  | -0.33015400 |
| H     | -5.27687600 | 1.33347300  | -0.24765100 | F | -0.17555800 | 1.01646500  | -0.88601000 |
| H     | -0.47885000 | -0.92346000 | -0.36166800 | C | 0.47478200  | 3.13110900  | -0.22303500 |
| C     | 0.95944400  | -3.61416100 | -2.25589800 | F | -0.69287600 | 3.59389000  | -0.69007300 |
| C     | 0.85652500  | -3.74513700 | -0.87527000 | C | 1.36808200  | 4.00282300  | 0.37240900  |
| C     | 0.86705200  | -2.60796800 | -0.07459100 | F | 1.07265800  | 5.29904900  | 0.49003600  |
| C     | 0.98209400  | -1.28822900 | -0.59840600 | C | 2.57421300  | 3.50620900  | 0.84819500  |
| C     | 1.04497100  | -1.21960500 | -2.02754200 | C | 2.85147400  | 2.15566100  | 0.70553500  |
| C     | 1.02875800  | -2.34238200 | -2.83620400 | F | 4.02866700  | 1.74037500  | 1.19363000  |
| H     | 0.98017000  | -4.49909700 | -2.88542200 | F | 3.44237300  | 4.33061400  | 1.43726400  |
| H     | 0.79224300  | -4.72934700 | -0.42222100 | C | -3.03843500 | 1.36922700  | -0.32928500 |
| H     | 0.82894000  | -2.73508600 | 1.00594200  | C | -3.02315100 | 1.65344900  | -1.71318400 |
| H     | 1.15544100  | -0.24418800 | -2.49098500 | C | -2.68781100 | 0.61370700  | -2.75607500 |
| H     | 1.10338800  | -2.24027700 | -3.91422200 | C | -3.28802000 | 2.95772600  | -2.12038300 |
|       |             |             |             | C | -3.54095000 | 3.97647500  | -1.20507200 |
|       |             |             |             | C | -3.76371500 | 5.38980100  | -1.66735400 |
| P20_P |             |             |             | C | -3.50096500 | 3.67198600  | 0.15396500  |
| P     | -2.90769300 | -0.38477900 | 0.06928700  | C | -3.23611000 | 2.38816200  | 0.62392900  |
| C     | -2.59669000 | -0.84855400 | 1.76792400  | C | -3.14931000 | 2.18615800  | 2.11765000  |
| C     | -3.58776700 | -1.20582800 | 2.69222400  | C | -4.36230400 | -1.30571700 | -0.50052600 |
| C     | -3.23312000 | -1.56677900 | 3.99122400  | C | -4.14539500 | -2.59457600 | -1.03530100 |
| C     | -1.89513000 | -1.61193300 | 4.39766200  | C | -2.76933100 | -3.19329900 | -1.16523000 |
| C     | -0.89169500 | -1.30054200 | 3.48429700  | C | -5.24740900 | -3.32611000 | -1.47018900 |
| C     | -1.27461500 | -0.91932500 | 2.18483600  | C | -6.54530000 | -2.82591700 | -1.38479000 |
| O     | -0.22395200 | -0.66022100 | 1.39153500  | C | -7.71313100 | -3.62898500 | -1.89095900 |
| C     | 0.91450600  | -0.90944800 | 2.15388300  | C | -6.73069200 | -1.56156500 | -0.83072700 |
| C     | 0.56120500  | -1.27488800 | 3.45951000  | C | -5.66544500 | -0.78061800 | -0.38275900 |
| C     | 1.58326000  | -1.52623600 | 4.37878700  | C | -5.97984500 | 0.57411600  | 0.20668300  |
| C     | 2.88916000  | -1.39441100 | 3.92785100  | H | -4.63133500 | -1.21013300 | 2.38944200  |
| C     | 3.17869000  | -1.05085000 | 2.59632800  | H | -4.01282600 | -1.83331800 | 4.69579900  |
| C     | 2.19565000  | -0.81079600 | 1.63016500  | H | -1.64481900 | -1.90611800 | 5.41182900  |
| B     | 2.41455200  | -0.36393200 | 0.07068200  | H | 1.36431400  | -1.80963200 | 5.40299400  |
| C     | 3.96807500  | -0.62194700 | -0.41690600 | H | 3.70980900  | -1.57129200 | 4.61556500  |
| C     | 4.74186000  | 0.24995900  | -1.17710300 | H | 4.22106700  | -0.97061100 | 2.29983000  |

|        |             |             |             |   |             |             |             |
|--------|-------------|-------------|-------------|---|-------------|-------------|-------------|
| H      | -2.77377500 | 1.04532800  | -3.75405000 | C | 1.11901100  | 2.18427900  | -1.44718800 |
| H      | -1.65471900 | 0.26458200  | -2.63399800 | C | 2.20729700  | 1.46732200  | -0.95166500 |
| H      | -3.35374900 | -0.25528200 | -2.71833100 | C | 3.45201500  | 2.04478100  | -1.21312800 |
| H      | -3.27722400 | 3.18576600  | -3.18300000 | C | 3.57527400  | 3.26148600  | -1.88450100 |
| H      | -4.41567800 | 5.93589200  | -0.98211600 | C | 2.44738600  | 3.94691200  | -2.31790700 |
| H      | -2.80507900 | 5.91742600  | -1.70697400 | C | 1.17661800  | 3.40512700  | -2.10920800 |
| H      | -4.20282300 | 5.41901000  | -2.66675600 | C | -0.12486300 | 4.01487100  | -2.62109800 |
| H      | -3.65557000 | 4.46791300  | 0.87776500  | C | -0.00570300 | 5.51865800  | -2.86750900 |
| H      | -3.28762700 | 3.14304200  | 2.62285300  | C | -0.48529500 | 3.31010100  | -3.94867200 |
| H      | -2.17149300 | 1.79204600  | 2.40799400  | B | 1.96320500  | 0.14307200  | -0.03276100 |
| H      | -3.90225300 | 1.49363700  | 2.50425400  | C | 1.12856000  | -1.05882700 | -0.80381700 |
| H      | -2.83644100 | -4.23678000 | -1.47748700 | C | 0.86097500  | -2.27127300 | -0.16825700 |
| H      | -2.20574500 | -3.16704000 | -0.22616000 | F | 1.23662800  | -2.45989300 | 1.11474400  |
| H      | -2.16489900 | -2.66881800 | -1.91376700 | C | 0.26792200  | -3.37194600 | -0.76230400 |
| H      | -5.08420300 | -4.31869800 | -1.88200200 | F | 0.01627500  | -4.47995300 | -0.05780700 |
| H      | -7.82676500 | -3.49656000 | -2.97163900 | C | -0.11791300 | -3.29742700 | -2.08985100 |
| H      | -8.64571400 | -3.31618600 | -1.41718400 | F | -0.72676700 | -4.32721900 | -2.67757300 |
| H      | -7.56919600 | -4.69539800 | -1.70340700 | C | 0.11645100  | -2.12432800 | -2.77989900 |
| H      | -7.73903600 | -1.16646600 | -0.73782000 | C | 0.74268300  | -1.05513700 | -2.14560900 |
| H      | -7.04658400 | 0.64018900  | 0.42721100  | F | 0.95307800  | -0.00296600 | -2.95463200 |
| H      | -5.43925100 | 0.75647900  | 1.13991900  | F | -0.29810600 | -2.00466100 | -4.04379100 |
| H      | -5.72178500 | 1.38489400  | -0.48117900 | C | 3.43176900  | -0.42814100 | 0.47819900  |
| H      | -1.79162000 | -0.86487000 | -0.62998100 | C | 4.04887100  | -1.59718400 | 0.03441400  |
| C      | 0.29959100  | -2.85705900 | -2.97421800 | F | 3.48126500  | -2.39146600 | -0.88652300 |
| C      | 0.46279300  | -3.33383600 | -1.67621500 | C | 5.29254800  | -2.03838800 | 0.48085400  |
| C      | 1.06440100  | -2.53452300 | -0.70290400 | F | 5.80917200  | -3.17691200 | 0.01615700  |
| C      | 1.54238400  | -1.24944000 | -0.99158600 | C | 6.00108100  | -1.28594200 | 1.39988000  |
| C      | 1.38209800  | -0.80351100 | -2.31401100 | F | 7.19336600  | -1.68923800 | 1.83487700  |
| C      | 0.76066700  | -1.57797600 | -3.28914900 | C | 5.45384200  | -0.09317400 | 1.84920500  |
| H      | -0.16383000 | -3.47855100 | -3.73557400 | C | 4.21221700  | 0.30675800  | 1.37657100  |
| H      | 0.12591700  | -4.33593700 | -1.42006200 | F | 3.78498100  | 1.49763900  | 1.82451400  |
| H      | 1.19573500  | -2.93431200 | 0.30053600  | F | 6.12928400  | 0.66415500  | 2.71606700  |
| H      | 1.76695800  | 0.17939300  | -2.58450100 | C | -3.31704900 | 0.22411300  | 1.81004600  |
| H      | 0.65746700  | -1.19694400 | -4.30179500 | C | -3.01121400 | 0.34821600  | 3.17911800  |
|        |             |             |             | C | -1.59596800 | 0.51214700  | 3.65305400  |
| P21_TS |             |             |             | C | -4.03227900 | 0.28245100  | 4.12381200  |
| P      | -1.93739100 | 0.29621600  | 0.57571900  | C | -5.36183700 | 0.09785500  | 3.75376100  |
| C      | -2.19155300 | 1.94546100  | -0.17508200 | C | -6.44699200 | 0.00460700  | 4.79339900  |
| C      | -3.27245600 | 2.78833800  | 0.10354700  | C | -5.64927700 | -0.00826000 | 2.39743700  |
| C      | -3.32406000 | 4.06000000  | -0.45617100 | C | -4.66064500 | 0.04645000  | 1.41080100  |
| C      | -2.31349200 | 4.50013500  | -1.31031000 | C | -5.12618300 | -0.08707400 | -0.02091600 |
| C      | -1.21842600 | 3.69118900  | -1.60756400 | C | -2.35678000 | -1.12341600 | -0.52400400 |
| C      | -1.17347400 | 2.43788200  | -0.99522800 | C | -2.68406800 | -1.05897500 | -1.89583100 |
| O      | -0.12278000 | 1.60389700  | -1.19599900 | C | -2.48631200 | 0.16257000  | -2.75588600 |

|   |             |             |             |       |             |             |             |
|---|-------------|-------------|-------------|-------|-------------|-------------|-------------|
| C | -3.19135200 | -2.20113600 | -2.51472300 | C     | 1.00238800  | 2.12968300  | 1.64803700  |
| C | -3.37557100 | -3.40469400 | -1.83675700 | C     | 1.15634800  | 2.74630000  | 2.88076900  |
| C | -3.90307500 | -4.61961500 | -2.54985800 | C     | 1.50041300  | 1.98635400  | 3.99807300  |
| C | -2.97438200 | -3.46635600 | -0.50675700 | H     | 1.88754600  | 0.00296200  | 4.74170300  |
| C | -2.45094100 | -2.35624500 | 0.15745900  | H     | 1.56331800  | -1.07665600 | 2.57637000  |
| C | -1.97323700 | -2.55873200 | 1.57774900  | H     | 0.78743900  | 2.76758700  | 0.79718800  |
| H | -4.06321800 | 2.45632000  | 0.76760900  | H     | 1.04401000  | 3.82242200  | 2.96525500  |
| H | -4.16188900 | 4.71091200  | -0.23140800 | H     | 1.66404100  | 2.46814900  | 4.95755600  |
| H | -2.38672000 | 5.48863200  | -1.75152700 |       |             |             |             |
| H | 4.35352600  | 1.54059800  | -0.87871400 | P21_P |             |             |             |
| H | 4.55988800  | 3.68282300  | -2.06063100 | P     | -2.53963400 | -0.02213700 | 0.17250800  |
| H | 2.55833000  | 4.90048000  | -2.82293100 | C     | -2.71395400 | 1.60252600  | -0.57064500 |
| H | 0.76252300  | 5.72085100  | -3.61725100 | C     | -3.98719300 | 2.11921800  | -0.83376600 |
| H | 0.25054600  | 6.05746000  | -1.95066500 | C     | -4.11422700 | 3.41666400  | -1.30157500 |
| H | -0.94266000 | 5.91982500  | -3.26312100 | C     | -2.97167600 | 4.19054600  | -1.50085900 |
| H | 0.27751100  | 3.53023800  | -4.70170000 | C     | -1.69166500 | 3.70287500  | -1.25169200 |
| H | -0.52010200 | 2.22511200  | -3.81528700 | C     | -1.57298600 | 2.39112700  | -0.77375700 |
| H | -1.45813100 | 3.65425800  | -4.31498400 | O     | -0.38174400 | 1.81337800  | -0.51383500 |
| H | -1.56016100 | 0.71610400  | 4.72544200  | C     | 0.73659100  | 2.63604500  | -0.27136000 |
| H | -1.02061400 | -0.40100600 | 3.47291900  | C     | 1.84322100  | 2.00806200  | 0.30596400  |
| H | -1.08123000 | 1.33026300  | 3.14194800  | C     | 2.89299500  | 2.87596700  | 0.63239000  |
| H | -3.77826500 | 0.37868100  | 5.17694600  | C     | 2.85355200  | 4.24215500  | 0.37286600  |
| H | -6.42507900 | -0.97207500 | 5.28746600  | C     | 1.76692000  | 4.78658700  | -0.29498500 |
| H | -6.31701100 | 0.76565200  | 5.56715300  | C     | 0.68812000  | 3.97732400  | -0.65459300 |
| H | -7.43580300 | 0.13178700  | 4.34789800  | C     | -0.41867100 | 4.45933900  | -1.58585500 |
| H | -6.68298400 | -0.13673300 | 2.08462300  | C     | -0.62422000 | 5.97456900  | -1.51867600 |
| H | -6.18166200 | 0.18646200  | -0.08717300 | C     | -0.01539900 | 4.06922000  | -3.02721900 |
| H | -5.01912800 | -1.11750000 | -0.37516300 | B     | 1.90414000  | 0.40567200  | 0.67482900  |
| H | -4.57007000 | 0.55410700  | -0.70796500 | C     | 1.58385200  | -0.59812100 | -0.61907100 |
| H | -2.73864700 | -0.07153300 | -3.79165100 | C     | 1.67995200  | -1.98517100 | -0.46879300 |
| H | -1.44050000 | 0.48004000  | -2.73051800 | F     | 1.97543300  | -2.52225600 | 0.72748500  |
| H | -3.10359700 | 1.00920900  | -2.43912000 | C     | 1.51961100  | -2.90561100 | -1.49706900 |
| H | -3.43984700 | -2.14753700 | -3.57190100 | F     | 1.52711600  | -4.22238200 | -1.25435500 |
| H | -4.36469800 | -5.32109800 | -1.85143800 | C     | 1.33755800  | -2.45110200 | -2.79028900 |
| H | -3.08177100 | -5.13728700 | -3.05414000 | F     | 1.12491400  | -3.31171600 | -3.79125300 |
| H | -4.64183000 | -4.34506400 | -3.30668700 | C     | 1.29603000  | -1.08904000 | -3.01618800 |
| H | -3.04109700 | -4.40985100 | 0.03017700  | C     | 1.43069500  | -0.20664200 | -1.95038500 |
| H | -1.63939000 | -3.59109900 | 1.70169100  | F     | 1.40314500  | 1.08652800  | -2.31611100 |
| H | -1.11514900 | -1.92123200 | 1.81704000  | F     | 1.06053600  | -0.63261700 | -4.25296100 |
| H | -2.76243700 | -2.35597100 | 2.30901600  | C     | 3.47588200  | -0.00250500 | 1.02405800  |
| H | -0.20227200 | 0.38741500  | 1.06645400  | C     | 4.45215200  | 0.20264900  | 0.04664400  |
| C | 1.62786100  | 0.60487100  | 3.87632900  | F     | 4.11350700  | 0.77136000  | -1.12323500 |
| C | 1.43527700  | -0.00336200 | 2.64308500  | C     | 5.78875700  | -0.13708300 | 0.19410800  |
| C | 1.14788200  | 0.72424400  | 1.45263700  | F     | 6.67177100  | 0.09807300  | -0.78023700 |

|   |             |             |             |        |             |             |             |
|---|-------------|-------------|-------------|--------|-------------|-------------|-------------|
| C | 6.20654600  | -0.73534500 | 1.37451300  | H      | -6.18716600 | -1.70636900 | -1.28909100 |
| F | 7.48512300  | -1.07519100 | 1.54170200  | H      | -4.60983200 | -2.47240300 | -1.05837600 |
| C | 5.27792200  | -0.97537700 | 2.37250800  | H      | -4.70740700 | -0.82066900 | -1.66149300 |
| C | 3.94531900  | -0.61547900 | 2.18256700  | H      | -1.55708000 | -0.24065100 | -4.05503500 |
| F | 3.12949300  | -0.91141900 | 3.20266900  | H      | -1.04441500 | 0.61589800  | -2.60768600 |
| F | 5.66557800  | -1.55871400 | 3.50988600  | H      | -2.76847700 | 0.50092700  | -2.99661500 |
| C | -4.09966900 | -0.31066600 | 1.04877100  | H      | -1.45198200 | -2.45191600 | -4.03046000 |
| C | -4.21699400 | 0.23979800  | 2.34337900  | H      | -1.90074700 | -5.84503000 | -2.85002500 |
| C | -3.13901700 | 1.09859600  | 2.95546700  | H      | -0.21765400 | -5.29837000 | -2.88520300 |
| C | -5.38632700 | -0.00241200 | 3.05931300  | H      | -1.31210700 | -4.84531200 | -4.19672200 |
| C | -6.43620300 | -0.74969800 | 2.52753300  | H      | -1.75881700 | -4.79631100 | -0.46991500 |
| C | -7.67093300 | -1.02469300 | 3.34312100  | H      | -1.82681200 | -3.75928500 | 1.62735300  |
| C | -6.31494000 | -1.22506200 | 1.22395700  | H      | -2.14024300 | -2.04872200 | 1.88172600  |
| C | -5.16675700 | -1.01604700 | 0.45927500  | H      | -3.45814200 | -3.11151900 | 1.39223400  |
| C | -5.16017000 | -1.53106200 | -0.96268900 | H      | -1.52188900 | 0.10135000  | 1.13380100  |
| C | -2.11146600 | -1.44383900 | -0.86628600 | C      | -0.33077900 | -1.19338900 | 3.58339800  |
| C | -1.87842100 | -1.34384300 | -2.25329100 | C      | 0.24604500  | -0.98971200 | 2.32704000  |
| C | -1.81862400 | -0.04164200 | -3.01492800 | C      | 0.96037400  | 0.17659800  | 2.00677700  |
| C | -1.65507100 | -2.52272900 | -2.96463200 | C      | 0.96860500  | 1.17109300  | 3.00222500  |
| C | -1.60174200 | -3.77091800 | -2.34907100 | C      | 0.38995000  | 0.98807900  | 4.25532600  |
| C | -1.24695600 | -5.01178900 | -3.12020900 | C      | -0.24423000 | -0.21211400 | 4.56621000  |
| C | -1.81176400 | -3.83369600 | -0.97328000 | H      | -0.83099100 | -2.13478000 | 3.79982100  |
| C | -2.08171900 | -2.69827000 | -0.21388300 | H      | 0.17489800  | -1.79290400 | 1.60015100  |
| C | -2.39153200 | -2.90270500 | 1.25133300  | H      | 1.48335400  | 2.10764400  | 2.80428400  |
| H | -4.86812600 | 1.51367900  | -0.64465600 | H      | 0.45422900  | 1.77815500  | 4.99844900  |
| H | -5.09550100 | 3.83012400  | -1.50445500 | H      | -0.67333600 | -0.37483100 | 5.55045200  |
| H | -3.08648800 | 5.20316700  | -1.87147400 |        |             |             |             |
| H | 3.77448600  | 2.46599000  | 1.11588100  | P22_TS |             |             |             |
| H | 3.68780300  | 4.87485700  | 0.65866000  | P      | 2.18300400  | 0.83226300  | 1.56183300  |
| H | 1.76735000  | 5.84009800  | -0.55032900 | C      | 3.29142800  | -0.43786800 | 0.87015900  |
| H | 0.29188900  | 6.49403500  | -1.80475700 | C      | 4.50943600  | -0.87633400 | 1.39905300  |
| H | -0.91165900 | 6.29822300  | -0.51431100 | C      | 5.22343300  | -1.88451200 | 0.75906700  |
| H | -1.39055000 | 6.29675100  | -2.22813500 | C      | 4.74318100  | -2.45096000 | -0.42343900 |
| H | 0.91363400  | 4.57899500  | -3.29902600 | C      | 3.54433000  | -2.02610100 | -0.99100300 |
| H | 0.15752200  | 2.99219400  | -3.10358600 | C      | 2.83848300  | -1.03143500 | -0.31160900 |
| H | -0.80123500 | 4.35579700  | -3.73473300 | O      | 1.64112600  | -0.59020900 | -0.79441200 |
| H | -3.48543900 | 1.51885000  | 3.90106300  | C      | 0.83461600  | -1.54015600 | -1.41868100 |
| H | -2.22601800 | 0.53188900  | 3.16716900  | C      | -0.53549500 | -1.42366400 | -1.18268100 |
| H | -2.87031600 | 1.93480600  | 2.30050500  | C      | -1.32128900 | -2.38775600 | -1.82214000 |
| H | -5.48247400 | 0.41595700  | 4.05814500  | C      | -0.76167900 | -3.40397800 | -2.59295800 |
| H | -8.51079200 | -1.31587600 | 2.70925800  | C      | 0.61706600  | -3.49256900 | -2.75616500 |
| H | -7.48743900 | -1.83920200 | 4.05108600  | C      | 1.44967700  | -2.54097900 | -2.16839800 |
| H | -7.96309600 | -0.14609600 | 3.92338400  | C      | 2.96794200  | -2.48527000 | -2.32652300 |
| H | -7.14477200 | -1.76712000 | 0.77708600  | C      | 3.30243600  | -1.40448900 | -3.37987700 |

|   |             |             |             |       |             |             |             |
|---|-------------|-------------|-------------|-------|-------------|-------------|-------------|
| C | 3.55503500  | -3.82229500 | -2.77432600 | H     | 2.74403800  | -1.25713900 | 3.59812100  |
| B | -1.10949600 | -0.26853200 | -0.18662600 | H     | 1.15228100  | -0.60252900 | 4.01435100  |
| C | -0.64609600 | 1.23075200  | -0.68276300 | H     | 1.95273100  | 2.13337300  | 5.05495400  |
| C | -0.55114800 | 1.51622600  | -2.04855200 | H     | 0.67327100  | 1.87012800  | 3.85831400  |
| F | -0.81825200 | 0.57633000  | -2.96195700 | H     | 1.96677700  | 3.03063500  | 3.52930700  |
| C | -0.24084500 | 2.76857700  | -2.56328300 | H     | 2.04923100  | 3.17846800  | 1.09404300  |
| F | -0.16886200 | 2.96169500  | -3.87987800 | H     | 4.51420800  | 3.76402500  | 0.93887600  |
| C | -0.01010000 | 3.82944700  | -1.69960200 | H     | 4.08770800  | 3.09500000  | 2.51653100  |
| F | 0.31453700  | 5.03144900  | -2.16945500 | H     | 4.91220500  | 2.08236100  | 1.31098800  |
| C | -0.11678600 | 3.60874200  | -0.33847700 | H     | 3.11410600  | 3.31508400  | -1.10370400 |
| C | -0.43497700 | 2.33886400  | 0.12742000  | H     | 3.78535700  | 1.68334200  | -0.94376600 |
| F | -0.51937600 | 2.24484900  | 1.47503900  | H     | 2.04017300  | 1.90223200  | -1.13801300 |
| F | 0.13638500  | 4.59735300  | 0.52673000  | H     | 0.52388100  | 0.09903400  | 1.33152500  |
| C | -2.75246700 | -0.34451900 | -0.06504900 | C     | -0.18738400 | -2.75383000 | 2.79408400  |
| C | -3.64634500 | 0.64593200  | -0.47144600 | C     | -1.01995700 | -2.26083600 | 3.79638400  |
| F | -3.23109800 | 1.79603700  | -1.02407000 | C     | -1.59552800 | -0.99402400 | 3.66697500  |
| C | -5.02998700 | 0.54153000  | -0.34016100 | C     | -1.34099700 | -0.23656600 | 2.53586800  |
| F | -5.81983700 | 1.53572500  | -0.74695700 | C     | -0.53173700 | -0.70848300 | 1.46553500  |
| C | -5.58603700 | -0.59678300 | 0.21471500  | C     | 0.03707900  | -1.99758200 | 1.65325400  |
| F | -6.90459500 | -0.71315700 | 0.34938800  | H     | 0.26457000  | -3.73515600 | 2.89472000  |
| C | -4.74416900 | -1.61963500 | 0.62833400  | H     | -1.22238100 | -2.85962700 | 4.67959400  |
| C | -3.37370200 | -1.47429200 | 0.47782800  | H     | -2.24589000 | -0.60967600 | 4.44621000  |
| F | -2.63350000 | -2.51144900 | 0.89651800  | H     | -1.80167100 | 0.74167100  | 2.44543200  |
| F | -5.25867800 | -2.72809400 | 1.16315700  | H     | 0.66584400  | -2.41689900 | 0.87239300  |
| C | 2.56139100  | 0.91756300  | 3.36959900  |       |             |             |             |
| C | 2.22814700  | -0.40903200 | 4.05673500  | P22_P |             |             |             |
| C | 1.74426800  | 2.06070100  | 3.98337500  | P     | 3.01135300  | -0.86331300 | -1.37530100 |
| C | 2.81841600  | 2.43628000  | 0.84643100  | C     | 3.63392000  | 0.57454800  | -0.51264200 |
| C | 4.15743200  | 2.86457600  | 1.45054700  | C     | 4.98409200  | 0.91288000  | -0.63825400 |
| C | 2.93666500  | 2.32259500  | -0.67752200 | C     | 5.51806200  | 1.92923900  | 0.13841900  |
| H | 4.88971800  | -0.44406800 | 2.32090700  | C     | 4.69532800  | 2.58372600  | 1.04864000  |
| H | 6.16220200  | -2.23115000 | 1.17748700  | C     | 3.34458600  | 2.27157100  | 1.20484000  |
| H | 5.32088600  | -3.23115600 | -0.90835000 | C     | 2.80911000  | 1.25440500  | 0.40585900  |
| H | -2.40102100 | -2.34916900 | -1.71713900 | O     | 1.52521900  | 0.84434900  | 0.48768000  |
| H | -1.40612900 | -4.13862500 | -3.06509700 | C     | 0.58651900  | 1.61161500  | 1.20510700  |
| H | 1.03951300  | -4.30009900 | -3.34475800 | C     | -0.76556300 | 1.30672000  | 0.97928600  |
| H | 2.87085500  | -1.68252000 | -4.34597100 | C     | -1.67043200 | 2.02493100  | 1.77159900  |
| H | 4.38693800  | -1.30321600 | -3.48993700 | C     | -1.27370200 | 2.97722600  | 2.70105000  |
| H | 2.88842000  | -0.43546500 | -3.08644600 | C     | 0.07201500  | 3.26888100  | 2.84662400  |
| H | 3.14549200  | -4.11087500 | -3.74524900 | C     | 1.03303600  | 2.59947100  | 2.08733700  |
| H | 4.63849700  | -3.74341200 | -2.89921300 | C     | 2.50515200  | 2.95150900  | 2.27365900  |
| H | 3.33950400  | -4.61746300 | -2.05445000 | C     | 2.97935000  | 2.45297100  | 3.65414000  |
| H | 3.63102000  | 1.12961300  | 3.48739700  | C     | 2.69333500  | 4.47819500  | 2.18345500  |
| H | 2.51810800  | -0.35997200 | 5.11100300  | B     | -1.33235100 | 0.14979700  | -0.05028300 |

|   |             |             |             |        |             |             |             |
|---|-------------|-------------|-------------|--------|-------------|-------------|-------------|
| C | -1.18988400 | -1.25869400 | 0.81408100  | H      | 3.75813000  | -2.46868100 | -4.63326900 |
| C | -1.96710800 | -1.45495400 | 1.95950700  | H      | 2.18348300  | -2.03878800 | -3.94058900 |
| F | -2.92358500 | -0.57192700 | 2.27453500  | H      | 3.24042800  | -3.19665200 | -3.10673300 |
| C | -1.83977300 | -2.53446900 | 2.81951500  | H      | 2.62977100  | -3.10573100 | -0.64032000 |
| F | -2.62112000 | -2.64992500 | 3.89344800  | H      | 4.94985900  | -3.61582300 | 0.27308500  |
| C | -0.87917800 | -3.50661700 | 2.56488800  | H      | 4.99100400  | -3.21941900 | -1.44642000 |
| F | -0.72462200 | -4.54150400 | 3.38950800  | H      | 5.48574200  | -2.01393600 | -0.23246500 |
| C | -0.09107600 | -3.37242000 | 1.43844000  | H      | 3.02201500  | -2.91948100 | 1.74042800  |
| C | -0.27387400 | -2.27470700 | 0.60304400  | H      | 3.79928600  | -1.33223900 | 1.56447900  |
| F | 0.55821600  | -2.25488900 | -0.46783000 | H      | 2.05733600  | -1.50584500 | 1.29080800  |
| F | 0.86832500  | -4.27002500 | 1.16307300  | H      | 1.64192400  | -0.69459400 | -1.62527400 |
| C | -2.91273100 | 0.44438900  | -0.45113100 | C      | 0.48352200  | 1.30482100  | -3.36611000 |
| C | -3.92259100 | -0.51079000 | -0.51833900 | C      | 0.28082700  | 0.21603800  | -4.21280600 |
| F | -3.69238100 | -1.78886100 | -0.16696300 | C      | -0.39370900 | -0.90553000 | -3.72841400 |
| C | -5.21376900 | -0.24511300 | -0.96134700 | C      | -0.85125200 | -0.92730200 | -2.41369700 |
| F | -6.13406000 | -1.21208000 | -0.99199600 | C      | -0.63788500 | 0.14206700  | -1.52742700 |
| C | -5.54165000 | 1.03179900  | -1.38551900 | C      | 0.02850000  | 1.26186100  | -2.04796500 |
| F | -6.77232700 | 1.30756900  | -1.81745200 | H      | 0.98373000  | 2.19619300  | -3.73678200 |
| C | -4.56666800 | 2.01768000  | -1.36456900 | H      | 0.62065900  | 0.24913900  | -5.24478400 |
| C | -3.29036200 | 1.70377500  | -0.91789300 | H      | -0.58413700 | -1.75095900 | -4.38465300 |
| F | -2.39400200 | 2.70288800  | -0.96095300 | H      | -1.40196200 | -1.79744500 | -2.05929300 |
| F | -4.86009500 | 3.24991000  | -1.78740800 | H      | 0.17706300  | 2.12955800  | -1.40956300 |
| C | 3.88193300  | -1.09668400 | -2.97112500 |        |             |             |             |
| C | 3.89146900  | 0.16726400  | -3.83460500 | P23_TS |             |             |             |
| C | 3.22414700  | -2.27690700 | -3.69895700 | C      | -1.46446200 | -2.08766500 | -2.16293800 |
| C | 3.32863900  | -2.33514700 | -0.30365100 | H      | -0.55727000 | -2.42631100 | -2.66331600 |
| C | 4.77430600  | -2.81789900 | -0.45315600 | H      | -2.03103800 | -1.47379400 | -2.87355800 |
| C | 3.02553100  | -1.99326000 | 1.16114400  | H      | -2.07516600 | -2.96384300 | -1.92382500 |
| H | 5.61507400  | 0.38031300  | -1.34477600 | C      | -1.17287500 | -1.25944900 | -0.93771800 |
| H | 6.56292100  | 2.20190600  | 0.04655400  | C      | 0.01990500  | -0.72306800 | -0.59714600 |
| H | 5.12521700  | 3.35822000  | 1.67600500  | P      | -2.59336300 | -0.80092800 | 0.10856000  |
| H | -2.72946800 | 1.82100800  | 1.65599000  | C      | -3.84982700 | 0.04539100  | -0.90656900 |
| H | -2.01328700 | 3.49856500  | 3.30003000  | C      | -4.56312700 | -0.62291700 | -1.90935500 |
| H | 0.38519200  | 4.02042900  | 3.56481200  | H      | -4.40097600 | -1.68434200 | -2.07603300 |
| H | 2.39086700  | 2.92281400  | 4.44717900  | C      | -5.48755100 | 0.07114900  | -2.68186800 |
| H | 4.03492800  | 2.69659700  | 3.81505800  | H      | -6.03604300 | -0.44775500 | -3.46118700 |
| H | 2.85612600  | 1.36927900  | 3.73444700  | C      | -5.70563500 | 1.43027000  | -2.45974900 |
| H | 2.12097300  | 4.98552100  | 2.96184900  | H      | -6.42137200 | 1.97022500  | -3.07112700 |
| H | 3.74027900  | 4.75996800  | 2.32359000  | C      | -5.01384100 | 2.09410900  | -1.45154900 |
| H | 2.35747300  | 4.85092300  | 1.21271900  | H      | -5.18436700 | 3.15046300  | -1.27263700 |
| H | 4.91193800  | -1.36284300 | -2.70501500 | C      | -4.09744900 | 1.39916900  | -0.66745800 |
| H | 4.45985300  | -0.03542700 | -4.74669000 | H      | -3.56565800 | 1.90923300  | 0.13051500  |
| H | 4.35089000  | 1.01636300  | -3.32414600 | C      | -3.35067200 | -2.39047300 | 0.58131200  |
| H | 2.87424700  | 0.44406800  | -4.11657200 | C      | -4.69398800 | -2.43398800 | 0.97386200  |



|   |             |             |             |       |             |             |             |
|---|-------------|-------------|-------------|-------|-------------|-------------|-------------|
| H | -5.30489000 | -1.53712200 | 0.91447900  | C     | -0.42029400 | -0.28542300 | 2.10669500  |
| C | -5.25187500 | -3.62289500 | 1.42968800  | C     | -0.21859500 | -1.66970300 | 2.36426100  |
| H | -6.29518100 | -3.64813300 | 1.72722800  | C     | -0.23922300 | -2.19362600 | 3.64569000  |
| C | -4.47501400 | -4.77754500 | 1.50380200  | C     | -0.49202200 | -1.35391800 | 4.72960000  |
| H | -4.91225100 | -5.70470000 | 1.85986100  | C     | -0.75525700 | -0.00034900 | 4.52059500  |
| C | -3.13901100 | -4.74096200 | 1.11624500  | C     | -0.72846100 | 0.51812900  | 3.23564200  |
| H | -2.53260100 | -5.63967200 | 1.16234700  | H     | -0.04244200 | -2.33156400 | 1.52406200  |
| C | -2.57493900 | -3.55343300 | 0.65806900  | H     | -0.06810500 | -3.25327900 | 3.80297100  |
| H | -1.53615000 | -3.53660300 | 0.33739800  | H     | -0.51073700 | -1.75961300 | 5.73672200  |
| B | 0.33066900  | 0.36892700  | 0.61337800  | H     | -0.99376300 | 0.64374000  | 5.36033100  |
| C | 1.20210100  | -1.12042100 | -1.41395200 | H     | -0.99508600 | 1.55729300  | 3.09397400  |
| F | 0.97415400  | -3.38843400 | -0.79305500 |       |             |             |             |
| C | 1.66147100  | -2.43391800 | -1.43373600 | P23_P |             |             |             |
| F | 3.24550400  | -4.06280200 | -2.07973900 | C     | -1.44261600 | -1.97194100 | -2.18066100 |
| C | 2.83242600  | -2.79799400 | -2.08271500 | H     | -0.52421500 | -2.34092200 | -2.63444500 |
| F | 4.69750400  | -2.16133600 | -3.36978400 | H     | -1.96624200 | -1.36461800 | -2.92786500 |
| C | 3.57656700  | -1.82704900 | -2.74039900 | H     | -2.07690700 | -2.83637800 | -1.95323400 |
| F | 3.86642200  | 0.42417000  | -3.36101900 | C     | -1.14529700 | -1.14010900 | -0.95103000 |
| C | 3.14880500  | -0.50504000 | -2.73684600 | C     | 0.05320800  | -0.66668900 | -0.54745600 |
| F | 1.60587100  | 1.11085700  | -2.04709600 | P     | -2.65747100 | -0.63602200 | -0.11961300 |
| C | 1.97397200  | -0.17215000 | -2.07828500 | C     | -3.88548200 | 0.02741600  | -1.26853600 |
| C | -0.33138900 | 1.84334800  | 0.30197400  | C     | -4.68099000 | -0.83619000 | -2.02971700 |
| F | -1.21517000 | 1.35733100  | -1.87395000 | H     | -4.59736600 | -1.91248300 | -1.90331200 |
| C | -1.02594300 | 2.20649900  | -0.85322000 | C     | -5.58948800 | -0.31005200 | -2.94099400 |
| F | -2.29036200 | 3.71509000  | -2.16223600 | H     | -6.20684800 | -0.97681600 | -3.53330000 |
| C | -1.59257100 | 3.46475200  | -1.05356300 | C     | -5.70667800 | 1.07081200  | -3.09088400 |
| F | -2.00286200 | 5.64642200  | -0.26228100 | H     | -6.41521900 | 1.47726200  | -3.80511300 |
| C | -1.45518600 | 4.44692200  | -0.09003600 | C     | -4.92407300 | 1.93058300  | -2.32512500 |
| F | -0.53170200 | 5.10508200  | 1.97601600  | H     | -5.01103600 | 3.00563900  | -2.43876500 |
| C | -0.72251900 | 4.16184100  | 1.05423600  | C     | -4.01428300 | 1.41149500  | -1.41041100 |
| F | 0.60769000  | 2.74001600  | 2.28773900  | H     | -3.41415200 | 2.08427600  | -0.80597000 |
| C | -0.17408100 | 2.89915500  | 1.20696200  | C     | -3.42427300 | -2.05891500 | 0.68784400  |
| C | 1.96230800  | 0.47040700  | 0.87169500  | C     | -4.68337900 | -1.90848500 | 1.27535900  |
| F | 2.22567900  | 2.76518900  | 0.23180700  | H     | -5.19885700 | -0.95262400 | 1.23254100  |
| C | 2.74647400  | 1.61016500  | 0.66284600  | C     | -5.27446300 | -2.99074400 | 1.91666600  |
| F | 4.79554600  | 2.78151000  | 0.62308600  | H     | -6.24635100 | -2.87560600 | 2.38416700  |
| C | 4.12745900  | 1.64862100  | 0.83409500  | C     | -4.61919300 | -4.21981500 | 1.95289700  |
| F | 6.13307500  | 0.52621700  | 1.36473100  | H     | -5.08525600 | -5.06428200 | 2.45011600  |
| C | 4.81414300  | 0.50503100  | 1.20311400  | C     | -3.37115500 | -4.37138600 | 1.35333100  |
| F | 4.73052100  | -1.79989800 | 1.68732000  | H     | -2.86286300 | -5.32916300 | 1.38404600  |
| C | 4.09855100  | -0.66802000 | 1.37620000  | C     | -2.76376900 | -3.28920800 | 0.72470300  |
| F | 2.13985100  | -1.86509600 | 1.30346100  | H     | -1.77412700 | -3.39164100 | 0.28688900  |
| C | 2.72222300  | -0.65625200 | 1.19922700  | B     | 0.40022700  | 0.38712300  | 0.71763000  |
| H | -1.46885600 | -0.21599500 | 1.35927000  | C     | 1.22653700  | -1.16678600 | -1.31844600 |

|   |             |             |             |            |             |             |             |
|---|-------------|-------------|-------------|------------|-------------|-------------|-------------|
| F | 0.82541200  | -3.39987100 | -0.65584100 |            |             |             |             |
| C | 1.59911800  | -2.50678200 | -1.28692300 | P24_TS     |             |             |             |
| F | 3.09419700  | -4.24931500 | -1.83603500 | P          | -1.88612300 | 0.40011300  | 0.43301100  |
| C | 2.76548300  | -2.96139700 | -1.88510800 | B          | 0.97535100  | -0.75481400 | 0.60112300  |
| F | 4.70109500  | -2.48248400 | -3.13328600 | C          | -0.51256200 | 1.12495300  | -0.56871600 |
| C | 3.58811300  | -2.05872700 | -2.54616800 | C          | 0.71676900  | 0.57717500  | -0.35453800 |
| F | 4.02973200  | 0.14895600  | -3.23327400 | C          | -3.07636800 | 1.74310900  | 0.85947500  |
| C | 3.24242800  | -0.71331500 | -2.59837600 | C          | -3.97909000 | 2.26194600  | -0.10506300 |
| F | 1.77182900  | 1.01160100  | -2.01768800 | C          | -4.85520400 | 3.27660300  | 0.26740500  |
| C | 2.07237200  | -0.28740400 | -1.98709000 | H          | -5.53326500 | 3.67764500  | -0.48273100 |
| C | -0.11761700 | 1.92329400  | 0.35477900  | C          | -4.89532400 | 3.79260800  | 1.56222400  |
| F | -1.14129300 | 1.49955000  | -1.77202900 | C          | -4.03230300 | 3.24728700  | 2.50171100  |
| C | -0.82619700 | 2.34338900  | -0.76628600 | H          | -4.05807000 | 3.61421500  | 3.52520300  |
| F | -2.05081500 | 3.92655500  | -2.02786000 | C          | -3.12692200 | 2.23041800  | 2.18107100  |
| C | -1.30615400 | 3.63921700  | -0.95294700 | C          | -4.06507800 | 1.77616200  | -1.52964700 |
| F | -1.48082000 | 5.85857000  | -0.17409900 | H          | -4.53594200 | 2.54043900  | -2.15174200 |
| C | -1.03204900 | 4.61607600  | -0.01527900 | H          | -4.66148800 | 0.86044400  | -1.59626200 |
| F | 0.02285800  | 5.19945600  | 2.00670200  | H          | -3.08311400 | 1.56812400  | -1.95336200 |
| C | -0.27685100 | 4.27213800  | 1.09871100  | C          | -5.85343300 | 4.89799400  | 1.91758500  |
| F | 0.91346200  | 2.72441900  | 2.32714300  | H          | -5.62047700 | 5.80792500  | 1.35623100  |
| C | 0.15759400  | 2.96506200  | 1.24703100  | H          | -5.80936600 | 5.13602100  | 2.98217800  |
| C | 2.05488000  | 0.37872000  | 0.93347800  | H          | -6.88173100 | 4.61793800  | 1.67160100  |
| F | 2.51095700  | 2.62023500  | 0.21563200  | C          | -2.25803900 | 1.73772800  | 3.31225700  |
| C | 2.93399600  | 1.43540100  | 0.67963700  | H          | -1.36926900 | 2.36635200  | 3.41733900  |
| F | 5.07907500  | 2.42098800  | 0.58531000  | H          | -1.91510800 |             | 0.71003700  |
| C | 4.31516200  | 1.35829400  | 0.83847700  | 3.18913500 |             |             |             |
| F | 6.22111500  | 0.08091900  | 1.39173500  | H          | -2.80946000 | 1.79721600  | 4.25375200  |
| C | 4.90222800  | 0.17225400  | 1.24304500  | C          | -2.95681300 | -0.86025800 | -0.39125800 |
| F | 4.62025800  | -2.09642100 | 1.81641400  | C          | -2.85373400 | -1.30085100 | -1.72807000 |
| C | 4.08668100  | -0.92467600 | 1.46758800  | C          | -3.71351100 | -2.30871200 | -2.17148100 |
| F | 2.02317500  | -1.93711100 | 1.47023600  | H          | -3.61261200 | -2.65487300 | -3.19831600 |
| C | 2.71429900  | -0.79339100 | 1.30854500  | C          | -4.65652600 | -2.91017500 | -1.34590400 |
| H | -2.41844300 | 0.38555800  | 0.80244500  | C          | -4.74910300 | -2.45412700 | -0.03510400 |
| C | -0.39825500 | -0.15941900 | 2.07285100  | H          | -5.47128000 | -2.91067800 | 0.63734300  |
| C | -0.54741300 | -1.53664400 | 2.31811900  | C          | -3.92182300 | -1.44865300 | 0.46303500  |
| C | -1.25478600 | -2.03904100 | 3.40957000  | C          | -1.88467100 | -0.75693800 | 2.74852200  |
| C | -1.87316700 | -1.17445200 | 4.30343800  | H          | -1.70539000 | -1.50954100 | -3.52089700 |
| C | -1.76296300 | 0.19559200  | 4.08604400  | H          | -0.91981300 | -0.49732900 | -2.31972400 |
| C | -1.03951300 | 0.68374300  | 3.00034700  | H          | -2.28720600 | 0.13537500  | -3.24098300 |
| H | -0.10935100 | -2.24755900 | 1.62658200  | C          | -5.49763200 | -4.05653500 | -1.83800600 |
| H | -1.33658700 | -3.11439800 | 3.54392100  | H          | -6.41938800 | -4.15232200 | -1.26000100 |
| H | -2.43343200 | -1.55841600 | 5.15036000  | H          | -4.93810200 | -4.99227100 | -1.74158900 |
| H | -2.23849100 | 0.89540300  | 4.76738400  | H          | -5.75925100 | -3.93289900 | -2.89171600 |
| H | -0.99744800 | 1.75954600  | 2.88592400  | C          | -4.11608300 | -1.05678800 | 1.90969100  |

|   |             |             |             |       |             |             |             |
|---|-------------|-------------|-------------|-------|-------------|-------------|-------------|
| H | -4.68364300 | -0.12494400 | 1.99787200  | F     | 5.73725400  | 0.35914200  | 1.70883300  |
| H | -3.16640500 | -0.92411800 | 2.43153100  | C     | 3.53504100  | -0.28311900 | 1.14993800  |
| H | -4.66558800 | -1.84308600 | 2.43051400  | F     | 3.19787600  | 0.96939100  | 1.50349500  |
| C | -0.74166200 | 2.30744800  | -1.45386800 | H     | -0.63779600 | -0.14659500 | 1.63322300  |
| C | -1.26298400 | 3.51549100  | -0.97340100 | C     | 0.80033100  | 1.10004300  | 2.64435400  |
| H | -1.47691200 | 3.62800100  | 0.08383600  | C     | 0.58209200  | -0.23666800 | 2.24469000  |
| C | -1.49212100 | 4.58129500  | -1.83729100 | C     | 0.81148300  | -1.22718000 | 3.23764600  |
| H | -1.89827800 | 5.50808100  | -1.44486900 | C     | 1.21623600  | -0.90087500 | 4.51933600  |
| C | -1.19382100 | 4.46643100  | -3.19208300 | C     | 1.40573400  | 0.43817300  | 4.87336300  |
| H | -1.37681600 | 5.29849200  | -3.86436500 | C     | 1.19770200  | 1.43923800  | 3.93227100  |
| C | -0.64069100 | 3.28410800  | -3.67606500 | H     | 0.64164400  | 1.89339300  | 1.92034500  |
| H | -0.38337400 | 3.19019400  | -4.72618100 | H     | 0.71845900  | -2.27553200 | 2.97692200  |
| C | -0.41308900 | 2.21702200  | -2.81374600 | H     | 1.39808000  | -1.68557700 | 5.24626400  |
| H | 0.02782400  | 1.29929000  | -3.19246800 | H     | 1.72448100  | 0.69345900  | 5.87949000  |
| C | 1.88497600  | 1.36679500  | -0.87417200 | H     | 1.35423500  | 2.48085600  | 4.19390600  |
| C | 2.07815300  | 2.69412100  | -0.47112600 |       |             |             |             |
| F | 1.21595400  | 3.29232900  | 0.36020900  | P24_P |             |             |             |
| C | 3.17055400  | 3.45399400  | -0.85481800 | P     | -2.03384500 | 0.39792600  | 0.26144700  |
| F | 3.29928200  | 4.70851100  | -0.42876100 | B     | 1.11316800  | -0.77623400 | 0.82314800  |
| C | 4.14122300  | 2.89744600  | -1.67453100 | C     | -0.48582900 | 1.10639900  | -0.41207500 |
| F | 5.19220100  | 3.61470000  | -2.05385500 | C     | 0.73247000  | 0.58598000  | -0.09385500 |
| C | 3.99728000  | 1.58455000  | -2.08946400 | C     | -3.23218200 | 1.70995400  | 0.67487900  |
| F | 4.91538000  | 1.03044400  | -2.87727000 | C     | -4.04726700 | 2.27073600  | -0.33072600 |
| C | 2.89125600  | 0.84388600  | -1.68684700 | C     | -4.95554400 | 3.26615300  | 0.02642300  |
| F | 2.83379600  | -0.40821900 | -2.13106800 | H     | -5.57124000 | 3.70944200  | -0.75215500 |
| C | 0.01002700  | -2.03419200 | 0.15578300  | C     | -5.09188500 | 3.71106600  | 1.33757900  |
| C | 0.12124200  | -2.52200000 | -1.14847900 | C     | -4.28021500 | 3.13635500  | 2.31331800  |
| F | 0.97718500  | -1.93559700 | -1.99214900 | H     | -4.36656100 | 3.47459600  | 3.34281200  |
| C | -0.61467200 | -3.56791600 | -1.67676200 | C     | -3.34917500 | 2.14339600  | 2.01530900  |
| F | -0.48468200 | -3.90809100 | -2.96068100 | C     | -3.98318300 | 1.86754400  | -1.78171800 |
| C | -1.54789700 | -4.21522500 | -0.88137600 | H     | -4.45712800 | 2.63386300  | -2.39801400 |
| F | -2.31871000 | -5.17671800 | -1.38476600 | H     | -4.49953700 | 0.91827600  | -1.95560500 |
| C | -1.71075000 | -3.78661600 | 0.42017900  | H     | -2.95265200 | 1.76654700  | -2.13198900 |
| F | -2.64668400 | -4.33483400 | 1.19666100  | C     | -6.09920200 | 4.76875600  | 1.69985700  |
| C | -0.95108600 | -2.72135800 | 0.89632300  | H     | -7.00303900 | 4.31102400  | 2.11457600  |
| F | -1.31703600 | -2.32799300 | 2.13398300  | H     | -6.39266500 | 5.35311000  | 0.82541500  |
| C | 2.56463100  | -1.18452500 | 0.69850800  | H     | -5.70055700 | 5.45105700  | 2.45440000  |
| C | 3.08497200  | -2.44811500 | 0.40646200  | C     | -2.50997400 | 1.59608300  | 3.14112700  |
| F | 2.30764500  | -3.46081200 | -0.00278900 | H     | -1.44208800 | 1.71248700  | 2.95101100  |
| C | 4.43038500  | -2.78379600 | 0.52597100  | H     | -2.68711300 | 0.52865100  | 3.31547200  |
| F | 4.84119400  | -4.01573400 | 0.22777400  | H     | -2.73911500 | 2.12074700  | 4.06987300  |
| C | 5.34423200  | -1.84096000 | 0.96239700  | C     | -2.97247500 | -0.89868900 | -0.62446100 |
| F | 6.63203200  | -2.14754600 | 1.08451100  | C     | -2.77759500 | -1.24558200 | -1.97444700 |
| C | 4.88622100  | -0.57246000 | 1.27876000  | C     | -3.58942700 | -2.23441600 | -2.53475100 |

|   |             |             |             |        |             |             |             |
|---|-------------|-------------|-------------|--------|-------------|-------------|-------------|
| H | -3.42065600 | -2.50886900 | -3.57299600 | C      | -1.70529900 | -4.06437300 | -0.46583300 |
| C | -4.56209600 | -2.90327100 | -1.80224900 | F      | -2.56222800 | -4.99310600 | -0.88881000 |
| C | -4.72614200 | -2.55411300 | -0.46287000 | C      | -1.74679900 | -3.61222300 | 0.83992000  |
| H | -5.46307700 | -3.08147700 | 0.13712700  | F      | -2.67989400 | -4.07918400 | 1.67470300  |
| C | -3.9556900  | -1.56893800 | 0.14754700  | C      | -0.88867500 | -2.59414700 | 1.24610200  |
| C | -1.72856900 | -0.64098700 | -2.86864100 | F      | -1.11219000 | -2.15501900 | 2.50169300  |
| H | -1.44929100 | -1.36178600 | -3.64024000 | C      | 2.69211900  | -1.24482900 | 0.55843500  |
| H | -0.82255300 | -0.38445200 | -2.32497700 | C      | 3.15469700  | -2.46216800 | 0.05621000  |
| H | -2.09955100 | 0.26036000  | -3.36844100 | F      | 2.32029400  | -3.45284900 | -0.30023300 |
| C | -5.36089200 | -4.02197500 | -2.41080100 | C      | 4.50049000  | -2.78474100 | -0.09632000 |
| H | -6.35755900 | -4.08655600 | -1.96849900 | F      | 4.85208000  | -3.97043200 | -0.59654400 |
| H | -4.85078600 | -4.97325400 | -2.22996900 | C      | 5.47620900  | -1.88029900 | 0.28086900  |
| H | -5.46468300 | -3.89605600 | -3.49058500 | F      | 6.76686800  | -2.17168700 | 0.13773300  |
| C | -4.17715800 | -1.32054300 | 1.62038100  | C      | 5.08050100  | -0.66877700 | 0.82479100  |
| H | -4.47334600 | -0.28756500 | 1.82481800  | F      | 5.99663900  | 0.21867900  | 1.21544000  |
| H | -3.27891600 | -1.54853800 | 2.20338700  | C      | 3.72754300  | -0.39538000 | 0.96779800  |
| H | -4.96852400 | -1.97466500 | 1.98828200  | F      | 3.45194200  | 0.78809100  | 1.54081400  |
| C | -0.65576200 | 2.32898500  | -1.26638900 | H      | -1.67633400 | -0.15829800 | 1.49170500  |
| C | -1.16578600 | 3.52351800  | -0.74580800 | C      | 0.81900000  | 0.81526100  | 2.97600600  |
| H | -1.42530500 | 3.58520700  | 0.30589800  | C      | 1.07147600  | -0.44173600 | 2.42473400  |
| C | -1.32396400 | 4.64036300  | -1.56161300 | C      | 1.41658800  | -1.46356800 | 3.32584300  |
| H | -1.72306000 | 5.55751900  | -1.14090300 | C      | 1.46022100  | -1.25626100 | 4.69730500  |
| C | -0.95900200 | 4.58677300  | -2.90302100 | C      | 1.17536600  | 0.00530200  | 5.22233600  |
| H | -1.08259200 | 5.45857300  | -3.53741200 | C      | 0.86373000  | 1.04268400  | 4.35467400  |
| C | -0.40933400 | 3.41670400  | -3.42237300 | H      | 0.61296400  | 1.65605400  | 2.31895800  |
| H | -0.09398600 | 3.37420200  | -4.45981100 | H      | 1.65300900  | -2.45231100 | 2.93373900  |
| C | -0.25624800 | 2.29914600  | -2.61039800 | H      | 1.72232100  | -2.07505700 | 5.36099200  |
| H | 0.19450300  | 1.39584200  | -3.01133700 | H      | 1.21399500  | 0.17588400  | 6.29379200  |
| C | 1.86639000  | 1.44758400  | -0.57380100 | H      | 0.66654600  | 2.03858000  | 4.74342400  |
| C | 2.08833900  | 2.71683700  | -0.03952900 |        |             |             |             |
| F | 1.25685100  | 3.22329200  | 0.87757200  | P25_TS |             |             |             |
| C | 3.16385100  | 3.50615800  | -0.41324400 | C      | -2.58639600 | -1.60857500 | 3.90438600  |
| F | 3.34252900  | 4.70431100  | 0.13739400  | C      | -1.36941300 | -1.88524500 | 4.45726300  |
| C | 4.05293900  | 3.04387400  | -1.37339300 | C      | -0.16951600 | -1.74630300 | 3.71656200  |
| F | 5.08055700  | 3.79610900  | -1.75059400 | C      | -0.15459200 | -1.26743300 | 2.35529200  |
| C | 3.84572400  | 1.80066900  | -1.95089700 | C      | -1.47325400 | -0.95583000 | 1.82449100  |
| F | 4.67024500  | 1.35976700  | -2.89768600 | C      | -2.61810700 | -1.15976300 | 2.57707100  |
| C | 2.76433800  | 1.02655700  | -1.54996700 | H      | 0.94748700  | -2.48249100 | 5.41083100  |
| F | 2.58141100  | -0.13648000 | -2.17443000 | H      | -3.50754000 | -1.73672400 | 4.46228400  |
| C | 0.05096800  | -1.98568900 | 0.41434300  | H      | -1.29333900 | -2.24422600 | 5.48002800  |
| C | 0.02706800  | -2.47292100 | -0.89341200 | C      | 1.02047800  | -2.13784800 | 4.38340400  |
| F | 0.84566300  | -1.93455600 | -1.80729800 | C      | 1.14409900  | -1.17233000 | 1.68275600  |
| C | -0.80659000 | -3.48145600 | -1.34657200 | H      | -3.58643700 | -0.96077200 | 2.12831100  |
| F | -0.81387500 | -3.83864500 | -2.63307700 | C      | 2.23743900  | -1.62853900 | 2.39825600  |

|   |             |             |             |       |             |             |             |
|---|-------------|-------------|-------------|-------|-------------|-------------|-------------|
| C | 2.20894600  | -2.10128000 | 3.72616300  | C     | -1.94231100 | 0.84912200  | -2.66822300 |
| H | 3.20708200  | -1.63086700 | 1.91586000  | H     | -6.06216800 | 0.87490900  | 0.40976200  |
| H | 3.12943000  | -2.41878300 | 4.20551300  | H     | -4.48814000 | 0.94734400  | 1.19444000  |
| P | -1.80829900 | -0.45132300 | 0.09074500  | H     | -4.67672600 | 1.56762900  | -0.44168200 |
| B | 1.52660800  | -0.61540400 | 0.16524000  | H     | -6.79351700 | -0.82093600 | -0.71089800 |
| C | 3.16157000  | -0.58647700 | -0.13863100 | H     | -7.08250100 | -3.26130000 | -2.77241800 |
| C | 3.93707500  | 0.31855700  | 0.59913700  | H     | -6.96158600 | -4.41385400 | -1.44189300 |
| F | 3.37393600  | 1.02453200  | 1.59091300  | H     | -7.90626600 | -2.92685200 | -1.24737400 |
| C | 5.29395000  | 0.53251600  | 0.41483200  | H     | -4.45326900 | -4.30735100 | -1.46079000 |
| F | 5.95443200  | 1.40944600  | 1.17098900  | H     | -2.28332500 | -4.44311600 | -0.88080200 |
| C | 5.96711400  | -0.18561100 | -0.56305800 | H     | -1.53590000 | -3.25239800 | 0.18536600  |
| F | 7.27055600  | -0.00511200 | -0.75948300 | H     | -1.44125000 | -3.05610700 | -1.57095300 |
| C | 5.25861200  | -1.10161800 | -1.31725700 | H     | -2.19555700 | 2.97022100  | 2.90962900  |
| C | 3.89423500  | -1.28710300 | -1.09571600 | H     | -1.31287800 | 1.47012700  | 2.61934900  |
| F | 3.34138200  | -2.21592000 | -1.88791900 | H     | -3.06381600 | 1.44305600  | 2.72465200  |
| F | 5.88466900  | -1.81584700 | -2.25392900 | H     | -2.80206500 | 4.34808700  | 1.31347600  |
| C | 1.09339300  | 0.95775000  | -0.06063900 | H     | -3.55053900 | 5.53719900  | -2.14294700 |
| C | 1.13519300  | 1.59873700  | -1.29739700 | H     | -2.19704000 | 6.04792600  | -1.12522300 |
| F | 1.52883400  | 0.93511800  | -2.40158300 | H     | -3.81086200 | 5.88676800  | -0.42369400 |
| C | 0.79485000  | 2.92728400  | -1.50583000 | H     | -2.65670100 | 3.36191800  | -2.84047100 |
| F | 0.74705500  | 3.42891500  | -2.74129100 | H     | -2.57348500 | 1.12659300  | -3.51551000 |
| C | 0.47211100  | 3.72118700  | -0.41873700 | H     | -0.90014500 | 0.98559000  | -2.98178200 |
| F | 0.08989000  | 4.98543100  | -0.58895000 | H     | -2.10366500 | -0.21289500 | -2.47192300 |
| C | 0.53484000  | 3.17157900  | 0.84923500  | H     | -0.24972600 | -1.19742400 | -0.56216200 |
| C | 0.84364100  | 1.82713700  | 1.00477400  | C     | 0.66142000  | -1.70340500 | -2.36840800 |
| F | 0.87085100  | 1.40366700  | 2.27576300  | C     | 0.81082000  | -1.81203800 | -0.96049800 |
| F | 0.20506600  | 3.91541800  | 1.90651200  | C     | 1.01592300  | -3.12836200 | -0.46601300 |
| C | -3.44066900 | -1.25020900 | -0.33596200 | C     | 1.12854400  | -4.22691500 | -1.30446200 |
| C | -4.70552500 | -0.61202600 | -0.30126500 | C     | 1.00363100  | -4.06513400 | -2.68246800 |
| C | -4.98844700 | 0.77196500  | 0.24023000  | C     | 0.75253700  | -2.80008900 | -3.21169300 |
| C | -5.82818900 | -1.32080400 | -0.74138200 | H     | 0.42493200  | -0.74224500 | -2.80165000 |
| C | -5.76950300 | -2.63500800 | -1.18829600 | H     | 1.11700400  | -3.27978700 | 0.60345600  |
| C | -6.99832700 | -3.34895300 | -1.68418800 | H     | 1.30795400  | -5.21149500 | -0.88472500 |
| C | -4.53163000 | -3.26600000 | -1.15700700 | H     | 1.08477500  | -4.92425000 | -3.34176600 |
| C | -3.37878900 | -2.60197500 | -0.74585400 | H     | 0.62715800  | -2.67113400 | -4.28184200 |
| C | -2.08951100 | -3.37627100 | -0.75043600 |       |             |             |             |
| C | -2.12287400 | 1.35400700  | -0.14175300 | P25_P |             |             |             |
| C | -2.32248600 | 2.31192000  | 0.88135600  | C     | -2.58990900 | -1.69684400 | 3.82795900  |
| C | -2.21234700 | 2.02742300  | 2.36063000  | C     | -1.40644600 | -2.21626000 | 4.26747000  |
| C | -2.65719600 | 3.61639700  | 0.52221400  | C     | -0.22895600 | -2.16870600 | 3.48109600  |
| C | -2.79834800 | 4.02145000  | -0.80451900 | C     | -0.17995400 | -1.52342200 | 2.18797200  |
| C | -3.11461000 | 5.45223500  | -1.14511900 | C     | -1.47048600 | -0.99266100 | 1.76926800  |
| C | -2.57780300 | 3.07279500  | -1.79471700 | C     | -2.60775700 | -1.11624300 | 2.55475200  |
| C | -2.23156500 | 1.75303400  | -1.49002500 | H     | 0.81038100  | -3.28423600 | 5.00780800  |

|   |             |             |             |                  |             |             |             |
|---|-------------|-------------|-------------|------------------|-------------|-------------|-------------|
| H | -3.49610700 | -1.75181500 | 4.42001000  | C                | -2.19266100 | 2.04671700  | 2.51106400  |
| H | -1.34449600 | -2.70424800 | 5.23645100  | C                | -2.47435100 | 3.77226000  | 0.76340400  |
| C | 0.90533000  | -2.81463300 | 4.03328800  | C                | -2.53577400 | 4.26281600  | -0.54092100 |
| C | 1.09613900  | -1.48923300 | 1.48393500  | C                | -2.71171500 | 5.73280900  | -0.80241700 |
| H | -3.56322900 | -0.76157300 | 2.17742400  | C                | -2.37450500 | 3.35840300  | -1.58181000 |
| C | 2.13226600  | -2.18344900 | 2.09063200  | C                | -2.15280400 | 1.99633800  | -1.35702500 |
| C | 2.06909500  | -2.84642800 | 3.33090200  | C                | -1.96906600 | 1.14674400  | -2.59484000 |
| H | 3.08692700  | -2.22207900 | 1.57844300  | H                | -6.10263600 | 1.16766400  | 0.28549400  |
| H | 2.94821500  | -3.35122200 | 3.71864600  | H                | -4.56856700 | 1.19399200  | 1.14735200  |
| P | -1.94396600 | -0.28088100 | 0.16545300  | H                | -4.64951700 | 1.78755200  | -0.50711100 |
| B | 1.51399800  | -0.81901900 | 0.01014900  | H                | -6.85205100 | -0.56308200 | -0.81232600 |
| C | 3.17422300  | -0.68389500 | -0.15846200 | H                | -6.82945400 | -3.87260000 | -2.45370500 |
| C | 3.91792700  | 0.02261000  | 0.79254000  | H                | -7.56498400 | -3.62658400 | -0.86845000 |
| F | 3.31086200  | 0.50222600  | 1.89100100  | H                | -7.79456300 | -2.41972400 | -2.13660400 |
| C | 5.27770900  | 0.27700800  | 0.70137600  | H                | -4.54314400 | -4.09495900 | -1.46873700 |
| F | 5.91570900  | 0.95365000  | 1.65959600  | H                | -2.39369600 | -4.27202000 | -0.81053100 |
| C | 5.97673400  | -0.17376900 | -0.40907300 | H                | -1.63612400 | -3.09610900 | 0.26294700  |
| F | 7.28353800  | 0.05822600  | -0.52492900 | H                | -1.50594400 | -2.91322100 | -1.48748300 |
| C | 5.29241200  | -0.86501400 | -1.39210000 | H                | -2.17331100 | 2.95267600  | 3.11780500  |
| C | 3.92434500  | -1.10041000 | -1.25909200 | H                | -1.30484000 | 1.46241700  | 2.75303800  |
| F | 3.37948200  | -1.76145600 | -2.28696700 | H                | -3.06649300 | 1.46205200  | 2.81585700  |
| F | 5.94654600  | -1.30130600 | -2.47073200 | H                | -2.58063400 | 4.46648600  | 1.59278800  |
| C | 1.12034100  | 0.79601800  | -0.08271500 | H                | -3.11342100 | 5.91504000  | -1.80130600 |
| C | 1.26320400  | 1.53814700  | -1.25850200 | H                | -1.74077200 | 6.23228300  | -0.73054700 |
| F | 1.68581400  | 0.95277300  | -2.39242500 | H                | -3.37948000 | 6.18917600  | -0.06798000 |
| C | 1.01825500  | 2.90001000  | -1.36506900 | H                | -2.40467600 | 3.71395500  | -2.60914200 |
| F | 1.05971500  | 3.50680500  | -2.55343300 | H                | -2.64724100 | 1.49576100  | -3.37683000 |
| C | 0.70271700  | 3.62502600  | -0.22732300 | H                | -0.94730000 | 1.26849600  | -2.97349200 |
| F | 0.41028500  | 4.92403400  | -0.30653100 | H                | -2.15785000 | 0.08047000  | -2.45988800 |
| C | 0.67402800  | 2.96921200  | 0.98879100  | H                | -1.01025800 | -0.72119100 | -0.77385200 |
| C | 0.87840000  | 1.59503700  | 1.03745000  | C                | 0.41003400  | -1.53036600 | -2.40483000 |
| F | 0.79351900  | 1.07212600  | 2.27190500  | C                | 0.97080300  | -1.85709600 | -1.15965700 |
| F | 0.34986100  | 3.64233600  | 2.09682600  | C                | 1.17780000  | -3.23193500 | -0.93985200 |
| C | -3.53141100 | -1.05693000 | -0.32825400 | C                | 0.88691700  | -4.20025100 | -1.89575300 |
| C | -4.77669000 | -0.38559200 | -0.33487100 | C                | 0.35041000  | -3.83443000 | -3.12816100 |
| C | -5.02749000 | 1.01821600  | 0.17142200  | C                | 0.10513100  | -2.48838400 | -3.37309600 |
| C | -5.89520700 | -1.07912200 | -0.79995000 | H                | 0.22829100  | -0.49560200 | -2.65868700 |
| C | -5.83738600 | -2.40071900 | -1.23131600 | H                | 1.59934000  | -3.56013600 | 0.00592300  |
| C | -7.07393300 | -3.11698900 | -1.70379300 | H                | 1.08468200  | -5.24617600 | -1.67820700 |
| C | -4.61173500 | -3.05359800 | -1.16436600 | H                | 0.12864700  | -4.58488200 | -3.88069100 |
| C | -3.45712800 | -2.41597000 | -0.71571800 | H                | -0.31351300 | -2.17246700 | -4.32490400 |
| C | -2.17903000 | -3.21019300 | -0.67968400 |                  |             |             |             |
| C | -2.09199800 | 1.52775500  | -0.02805600 | <b>propylene</b> |             |             |             |
| C | -2.25293400 | 2.42899500  | 1.05157400  | <b>N1_TS</b>     |             |             |             |

|   |             |             |             |              |             |             |             |
|---|-------------|-------------|-------------|--------------|-------------|-------------|-------------|
| C | 0.90288000  | -2.37595300 | -0.74652500 | H            | -0.21809100 | 3.57493800  | 1.95403100  |
| C | -0.01097800 | -1.33334800 | -0.92619700 | H            | -3.95518000 | 2.63366400  | -1.20560600 |
| C | -0.82481400 | -1.43402100 | -2.06829900 | H            | 1.99776000  | 4.00812300  | 1.47730400  |
| C | -0.67455800 | -2.45309400 | -3.00065700 | H            | 3.63505000  | 2.19153300  | -2.00643100 |
| C | 0.29031700  | -3.43993400 | -2.80898600 | C            | 1.71796100  | -3.65995900 | 1.16853600  |
| C | 1.07190200  | -3.41375400 | -1.66110200 | H            | 2.17146700  | -3.53040300 | 2.14890500  |
| H | -1.58574500 | -0.67536100 | -2.23113000 | H            | 0.69975800  | -4.03452300 | 1.28588300  |
| H | -1.31024400 | -2.47955200 | -3.88011000 | H            | 2.30270300  | -4.37140800 | 0.57771700  |
| H | 0.42195500  | -4.23358700 | -3.53690800 | C            | 3.01859800  | -1.75829800 | 0.36397600  |
| H | 1.80781900  | -4.19347000 | -1.49017000 | H            | 3.46718400  | -1.71326600 | 1.35925300  |
| H | 1.00863400  | -1.50835000 | 1.12038100  | H            | 3.63564400  | -2.37513400 | -0.29753700 |
| B | -0.15600300 | -0.03157200 | 0.02668800  | H            | 2.92862400  | -0.74735700 | -0.03543900 |
| N | 1.66836000  | -2.34628100 | 0.49499100  | H            | -4.74888800 | -0.75921100 | 1.25421700  |
| C | 0.95447900  | 1.16154900  | -0.12965700 | C            | -2.33490500 | -1.72088300 | 1.46132500  |
| C | 0.99425400  | 2.24300500  | 0.79491200  | H            | -3.14660000 | -2.44561300 | 1.35559600  |
| C | 1.91373100  | 1.21395300  | -1.18127000 | H            | -1.42258900 | -2.17792800 | 1.07397400  |
| C | 2.00618500  | 3.20439600  | 0.74216600  | H            | -2.19648500 | -1.54342300 | 2.53334900  |
| C | 2.91421300  | 2.19207800  | -1.19107200 | C            | 0.44377600  | -0.51314600 | 2.06891200  |
| C | 3.00548800  | 3.18156500  | -0.22107400 | H            | 1.27781400  | 0.18025400  | 2.20322900  |
| C | -1.73372000 | 0.37403500  | 0.09114600  | H            | -0.48566100 | 0.03686400  | 2.21639800  |
| C | -2.23890000 | 1.48126600  | -0.64256700 | C            | 1.55607200  | -1.69042800 | 3.98657100  |
| C | -2.69023600 | -0.44033900 | 0.73854300  | H            | 2.39985900  | -1.00425700 | 3.96540500  |
| C | -3.60306300 | 1.77836900  | -0.63143100 | C            | 0.52913300  | -1.55332000 | 3.14127300  |
| C | -4.04781700 | -0.10703500 | 0.73535500  | H            | -0.29435800 | -2.26338900 | 3.22199200  |
| C | -4.52811700 | 1.01358100  | 0.07301800  | H            | 1.57198900  | -2.47086000 | 4.74107600  |
| C | -1.37630600 | 2.37644400  | -1.50920000 |              |             |             |             |
| H | -0.77715700 | 3.07615600  | -0.91965300 | <b>N1_P1</b> |             |             |             |
| H | -0.67370500 | 1.80520300  | -2.12208600 | C            | -1.35112500 | 1.94765400  | -0.70528600 |
| H | -2.01085500 | 2.96000100  | -2.18110300 | C            | -0.08371200 | 1.34986000  | -0.66065400 |
| C | -5.98824600 | 1.38315900  | 0.10098700  | C            | 0.80861700  | 1.87931800  | -1.61312100 |
| H | -6.18403000 | 2.14789900  | 0.86021900  | C            | 0.47807400  | 2.90706900  | -2.48805600 |
| H | -6.31349400 | 1.78785600  | -0.86129600 | C            | -0.79379300 | 3.47566700  | -2.46258400 |
| H | -6.61151300 | 0.51683100  | 0.33641500  | C            | -1.72516800 | 2.98092100  | -1.56165600 |
| C | 1.90695700  | 0.32055800  | -2.41112800 | H            | 1.80356000  | 1.44464300  | -1.66749200 |
| H | 2.16028500  | -0.72365500 | -2.21135100 | H            | 1.21639600  | 3.26751000  | -3.19789700 |
| H | 0.92876700  | 0.31165100  | -2.89777300 | H            | -1.06027800 | 4.28329300  | -3.13558300 |
| H | 2.63076500  | 0.70048900  | -3.13575400 | H            | -2.72976300 | 3.39562300  | -1.53422600 |
| C | 4.11809000  | 4.19630700  | -0.22724300 | H            | -2.00422300 | 0.59109400  | 0.64444400  |
| H | 4.53238400  | 4.32510300  | -1.23028700 | B            | 0.32746500  | 0.14809500  | 0.44319700  |
| H | 3.76760100  | 5.16940400  | 0.12679200  | N            | -2.42658800 | 1.41849800  | 0.18750100  |
| H | 4.93669300  | 3.88465700  | 0.43059300  | C            | -0.85845800 | -1.03378500 | 0.22473200  |
| C | -0.04744400 | 2.49758800  | 1.87128800  | C            | -1.50453500 | -1.71396800 | 1.29009900  |
| H | -1.00729700 | 2.02818000  | 1.66012600  | C            | -1.32048800 | -1.37504000 | -1.07966900 |
| H | 0.29105700  | 2.14773100  | 2.85178200  | C            | -2.64564800 | -2.49981500 | 1.07082100  |

|   |             |             |             |               |             |             |             |
|---|-------------|-------------|-------------|---------------|-------------|-------------|-------------|
| C | -2.42961000 | -2.20109500 | -1.26972100 | C             | 0.12437300  | 0.88583900  | 1.95965100  |
| C | -3.15110400 | -2.73176900 | -0.20162800 | H             | -0.88291600 | 0.63791800  | 2.33326500  |
| C | 1.88262100  | -0.41896000 | 0.21684000  | H             | 0.78910500  | 0.41798900  | 2.69569800  |
| C | 2.22962300  | -1.76359300 | -0.10493800 | C             | 0.40023800  | 2.99622400  | 3.32345900  |
| C | 2.99274900  | 0.46902700  | 0.32983300  | H             | 0.49112500  | 2.43117200  | 4.24867500  |
| C | 3.55511600  | -2.12451400 | -0.38766600 | C             | 0.24564600  | 2.38517800  | 2.14816400  |
| C | 4.29826700  | 0.07290200  | 0.03132700  | H             | 0.17344500  | 3.01963200  | 1.26201500  |
| C | 4.60795900  | -1.22499600 | -0.35030500 | H             | 0.46673800  | 4.07732500  | 3.40047800  |
| C | 1.27430000  | -2.94488800 | -0.13656700 | <b>N2_TS2</b> |             |             |             |
| H | 0.64807500  | -2.99933000 | 0.75406400  | C             | -0.56738800 | 2.62283800  | -0.34759700 |
| H | 0.60372800  | -2.93766400 | -0.99890500 | C             | 0.26542700  | 1.57115100  | -0.73556900 |
| H | 1.85322100  | -3.87057300 | -0.18523300 | C             | 1.04049500  | 1.80997800  | -1.88371500 |
| C | 6.02367900  | -1.64455500 | -0.64941300 | C             | 0.96272000  | 3.00158900  | -2.59653600 |
| H | 6.04693600  | -2.55141200 | -1.25915600 | C             | 0.10207400  | 4.01533500  | -2.18051200 |
| H | 6.56444500  | -0.85891600 | -1.18450500 | C             | -0.66531300 | 3.82813000  | -1.03847500 |
| H | 6.57750600  | -1.85185800 | 0.27274200  | H             | 1.72768700  | 1.03830800  | -2.21819100 |
| C | -0.58335000 | -0.95655600 | -2.33766400 | H             | 1.57685300  | 3.14197700  | -3.48083000 |
| H | -0.96505100 | -0.02240100 | -2.76576800 | H             | 0.03266400  | 4.94440400  | -2.73662000 |
| H | 0.48203100  | -0.81412400 | -2.14336000 | H             | -1.33887000 | 4.61044300  | -0.69998300 |
| H | -0.69286900 | -1.73672500 | -3.09685800 | H             | -0.73129700 | 1.33567300  | 1.30325500  |
| C | -4.38688100 | -3.56334600 | -0.42853900 | B             | 0.24215600  | 0.13608700  | 0.02465400  |
| H | -5.24383400 | -2.93735800 | -0.70143600 | N             | -1.34732800 | 2.38871700  | 0.86408100  |
| H | -4.23771100 | -4.27828400 | -1.24255600 | C             | -1.07243800 | -0.70859600 | -0.39857400 |
| H | -4.65834300 | -4.12290500 | 0.46976200  | C             | -2.13991800 | -0.92471500 | 0.48179700  |
| C | -0.91667300 | -1.79307400 | 2.68796500  | C             | -1.21046000 | -1.25201600 | -1.69463500 |
| H | 0.15762100  | -1.60426000 | 2.67035400  | C             | -3.29868300 | -1.62795500 | 0.15371000  |
| H | -1.36809000 | -1.09618400 | 3.40103100  | C             | -2.36392300 | -1.96766300 | -2.02537000 |
| H | -1.07367800 | -2.80237700 | 3.07919400  | C             | -3.41438700 | -2.16866800 | -1.13292000 |
| H | 3.76663900  | -3.16122100 | -0.64362200 | C             | 1.68508800  | -0.58737600 | 0.10172200  |
| H | -3.11462600 | -2.98929200 | 1.92371400  | C             | 1.89508100  | -1.97770700 | 0.24581200  |
| H | -2.73356800 | -2.44617800 | -2.28739700 | C             | 2.83484800  | 0.22124600  | 0.10788200  |
| C | -2.87840100 | 2.37277300  | 1.24062500  | C             | 3.20223300  | -2.46627700 | 0.33952200  |
| H | -3.62132800 | 1.86788800  | 1.86073200  | C             | 4.13674100  | -0.26228000 | 0.21061300  |
| H | -2.02599700 | 2.68082400  | 1.84375000  | C             | 4.32637300  | -1.64647000 | 0.31724100  |
| H | -3.32801000 | 3.23705500  | 0.75055900  | C             | 5.71103600  | -2.22942000 | 0.42074900  |
| C | -3.60140100 | 0.90227600  | -0.57864000 | H             | 6.24350400  | -1.84043100 | 1.29592700  |
| H | -4.18768900 | 0.26538700  | 0.08638500  | H             | 5.67446500  | -3.31777200 | 0.50354700  |
| H | -4.19624800 | 1.74958200  | -0.91986500 | H             | 6.31677500  | -1.97630800 | -0.45660600 |
| H | -3.23568100 | 0.31856400  | -1.41964000 | C             | -4.63717400 | -2.94994400 | -1.53683500 |
| H | 5.09981100  | 0.80531700  | 0.11541500  | H             | -4.55330400 | -3.30686200 | -2.56564400 |
| C | 2.87542100  | 1.88759900  | 0.84050800  | H             | -4.78717300 | -3.82064100 | -0.88870800 |
| H | 3.78425900  | 2.44981300  | 0.60845800  | H             | -5.54522100 | -2.34065700 | -1.46412700 |
| H | 2.03463400  | 2.43626900  | 0.41971800  | C             | -1.18188100 | 3.46636400  | 1.85669600  |
| H | 2.75140400  | 1.90009100  | 1.92705000  |               |             |             |             |



|              |             |             |             |   |             |             |             |
|--------------|-------------|-------------|-------------|---|-------------|-------------|-------------|
| H            | -1.78669900 | 3.23227600  | 2.73332900  | H | 1.75510300  | 3.57799000  | -2.66805600 |
| H            | -0.12868400 | 3.52930700  | 2.13837900  | H | -0.43682800 | 4.78015000  | -2.66081400 |
| H            | -1.50476400 | 4.42745000  | 1.44691700  | H | -2.26057400 | 3.91939300  | -1.23201700 |
| C            | -2.77977000 | 2.15642000  | 0.57949900  | H | -1.90419200 | 1.09195200  | 0.97790500  |
| H            | -3.25541100 | 1.75992300  | 1.48054700  | B | 0.36745300  | 0.14202500  | 0.48225000  |
| H            | -3.25592000 | 3.09995200  | 0.28853800  | N | -2.24463700 | 1.84414500  | 0.35800500  |
| H            | -2.86874200 | 1.42936800  | -0.22574000 | C | -0.87232500 | -0.81539500 | -0.03638600 |
| C            | 0.77601300  | -2.99210800 | 0.32369200  | C | -1.83012400 | -1.32046400 | 0.85665500  |
| H            | -0.00677500 | -2.69249500 | 1.02611700  | C | -1.07863200 | -1.12908900 | -1.40204900 |
| H            | 0.28137800  | -3.13241400 | -0.64241900 | C | -2.94420100 | -2.07912900 | 0.48165000  |
| H            | 1.17075300  | -3.95930800 | 0.64515800  | C | -2.17477600 | -1.90842600 | -1.78204800 |
| C            | -0.13603200 | -1.11144400 | -2.74624600 | C | -3.12182700 | -2.38365800 | -0.87304500 |
| H            | -0.17934400 | -0.12938200 | -3.22920000 | C | 1.88256500  | -0.48220500 | 0.24506200  |
| H            | 0.86389600  | -1.22045400 | -2.31480600 | C | 2.24434400  | -1.81498100 | -0.04999100 |
| H            | -0.25716900 | -1.86996500 | -3.52413100 | C | 2.96025700  | 0.38772500  | 0.50581900  |
| C            | -4.39819400 | -1.80000500 | 1.16986200  | C | 3.60059000  | -2.16359000 | -0.13771400 |
| H            | -5.34634400 | -1.38125600 | 0.81314200  | C | 4.30657100  | 0.04931800  | 0.42402600  |
| H            | -4.58356000 | -2.85761100 | 1.38891300  | C | 4.63949100  | -1.26721600 | 0.07454600  |
| H            | -4.14106600 | -1.30237700 | 2.10899700  | C | 6.07775500  | -1.70018700 | -0.03634300 |
| C            | 5.31429300  | 0.67773000  | 0.20959300  | H | 6.61195300  | -1.56598800 | 0.91131900  |
| H            | 5.89774600  | 0.59189600  | 1.13332600  | H | 6.14936800  | -2.75382200 | -0.31604800 |
| H            | 5.99916000  | 0.46273400  | -0.61842900 | H | 6.61706600  | -1.11393700 | -0.78914800 |
| H            | 4.98604100  | 1.71512200  | 0.11371100  | C | -4.29101100 | -3.21435000 | -1.33423800 |
| H            | 3.34837200  | -3.54023500 | 0.44384200  | H | -4.27282700 | -3.35051400 | -2.41774500 |
| H            | 2.70922600  | 1.30036000  | 0.03649600  | H | -4.28255300 | -4.20694100 | -0.87024300 |
| H            | -2.44407900 | -2.39182200 | -3.02532300 | H | -5.24760100 | -2.74999500 | -1.06786800 |
| H            | -2.08091800 | -0.51701500 | 1.48588800  | C | -2.83326100 | 2.90307400  | 1.22769800  |
| C            | 0.11471500  | 0.41627200  | 2.09206000  | H | -3.49337600 | 2.42181700  | 1.94930800  |
| H            | 1.10571700  | 0.86116400  | 2.21600100  | H | -2.03446600 | 3.42936400  | 1.74380200  |
| C            | -1.57577700 | -0.08728100 | 3.91861100  | H | -3.39818100 | 3.59565000  | 0.60507100  |
| H            | -1.74439600 | -1.10118500 | 3.56333200  | C | -3.31230300 | 1.24814100  | -0.50372200 |
| C            | -0.71388000 | 0.73082200  | 3.30905400  | H | -4.08331200 | 0.83128500  | 0.14636100  |
| H            | -0.56591000 | 1.71642700  | 3.74997000  | H | -3.72299700 | 2.04152200  | -1.12863800 |
| H            | -2.11493200 | 0.21980000  | 4.80873400  | H | -2.87245600 | 0.46183500  | -1.11386600 |
| H            | 0.23534300  | -0.66755700 | 2.06806600  | C | 1.25668000  | -2.94577900 | -0.24849600 |
| <b>N2_P2</b> |             |             |             | H | 0.46009900  | -2.93014900 | 0.49762200  |
| C            | -1.06070400 | 2.30672100  | -0.43032600 | H | 0.77151800  | -2.90929000 | -1.22924800 |
| C            | 0.14534600  | 1.58867000  | -0.36512100 | H | 1.77459700  | -3.90600800 | -0.17451000 |
| C            | 1.12989800  | 2.11999200  | -1.22620400 | C | -0.14263500 | -0.65101000 | -2.48797300 |
| C            | 0.94514300  | 3.23813300  | -2.02974000 | H | -0.39006400 | 0.36770300  | -2.81040800 |
| C            | -0.27418300 | 3.90891500  | -2.03555200 | H | 0.89396800  | -0.63338500 | -2.14175800 |
| C            | -1.29251000 | 3.42590400  | -1.22962100 | H | -0.20715000 | -1.30233300 | -3.36443000 |
| H            | 2.08124200  | 1.60444100  | -1.28933200 | C | -3.92412200 | -2.56922800 | 1.51669000  |
|              |             |             |             | H | -4.94353500 | -2.22487500 | 1.30553100  |

|              |             |             |             |             |             |             |             |
|--------------|-------------|-------------|-------------|-------------|-------------|-------------|-------------|
| H            | -3.96292900 | -3.66394500 | 1.54491800  | C           | -3.35844700 | -2.31576500 | 0.54119700  |
| H            | -3.64750700 | -2.21800300 | 2.51378000  | C           | -3.10751800 | 2.38136400  | -0.73642900 |
| C            | 5.38211100  | 1.06414400  | 0.71405900  | H           | -3.51138600 | 2.10911900  | -1.71334400 |
| H            | 6.01899500  | 0.74806000  | 1.54829200  | H           | -3.27474400 | 1.56247800  | -0.03540600 |
| H            | 6.04224000  | 1.21021800  | -0.14882600 | H           | -3.62087500 | 3.27680400  | -0.36350900 |
| H            | 4.94692400  | 2.03262600  | 0.97206000  | C           | -1.39296700 | 3.76497400  | -1.74178900 |
| H            | 3.85234000  | -3.19717300 | -0.37225000 | H           | -1.79345300 | 3.54550100  | -2.73613400 |
| H            | 2.73051700  | 1.41276900  | 0.80103500  | H           | -1.86225300 | 4.68496200  | -1.37299400 |
| H            | -2.29995900 | -2.15480700 | -2.83610600 | H           | -0.31423200 | 3.92057600  | -1.81037300 |
| H            | -1.70417800 | -1.12325800 | 1.91894100  | F           | -4.37211800 | -1.68984100 | -1.49129300 |
| C            | 0.34709600  | 0.35456000  | 2.15849100  | F           | -4.36565500 | -3.13578700 | 0.82391800  |
| H            | 1.35129600  | 0.71131100  | 2.41196400  | F           | -2.28781100 | -2.86859900 | 2.56365500  |
| C            | -1.63058800 | 1.00240200  | 3.62326300  | F           | -0.26263100 | -1.21689400 | 2.00004800  |
| H            | -1.86419300 | -0.02469300 | 3.89388000  | F           | -2.39475000 | -0.03559500 | -2.06055200 |
| C            | -0.59794100 | 1.29433300  | 2.82288100  | F           | 0.88701000  | -2.42845400 | -0.11890300 |
| H            | -0.39467000 | 2.35221900  | 2.62806800  | F           | 3.37730300  | -3.29104900 | 0.13134300  |
| H            | -2.23960000 | 1.77809400  | 4.07993900  | F           | 5.45452300  | -1.53335400 | 0.19165000  |
| H            | 0.26088800  | -0.64236600 | 2.61059700  | F           | 4.96314200  | 1.13866900  | 0.01024900  |
|              |             |             |             | F           | 2.46718400  | 2.03555100  | -0.22236200 |
| <b>N3_TS</b> |             |             |             | C           | 0.17007100  | 1.00105800  | -2.12784100 |
| C            | -1.02259100 | 2.75563200  | 0.44185900  | H           | 1.09909700  | 1.56736800  | -2.04567000 |
| C            | -0.15843200 | 1.71466400  | 0.77616700  | H           | -0.46328400 | 1.58346600  | -2.81991300 |
| C            | 0.45324500  | 1.77981500  | 2.03475500  | C           | 1.53726500  | -0.80348800 | -3.18855000 |
| C            | 0.21349300  | 2.84212000  | 2.89935400  | H           | 2.46280000  | -0.27464000 | -2.97180800 |
| C            | -0.64382000 | 3.87615600  | 2.52563500  | C           | 0.35518200  | -0.31973800 | -2.81956500 |
| C            | -1.26782400 | 3.83681900  | 1.28454900  | H           | -0.54899100 | -0.87308400 | -3.05313500 |
| H            | 1.12714600  | 0.98411600  | 2.33903900  | H           | 1.61882000  | -1.74999400 | -3.71175500 |
| H            | 0.70001200  | 2.86873000  | 3.86927000  |             |             |             |             |
| H            | -0.82714500 | 4.70647700  | 3.19967200  | <b>N3_P</b> |             |             |             |
| H            | -1.94321100 | 4.63260000  | 0.98139900  | C           | 1.09629700  | 2.70345600  | -0.51618900 |
| H            | -0.78716400 | 1.50314000  | -1.36528400 | C           | 0.41513700  | 1.50938600  | -0.71768200 |
| B            | 0.04373900  | 0.47104200  | -0.23619600 | C           | 0.16428600  | 1.21711500  | -2.07407200 |
| N            | -1.66096500 | 2.62509500  | -0.85512200 | C           | 0.53855100  | 2.06397200  | -3.10618000 |
| C            | 1.53440000  | -0.14350800 | -0.11460800 | C           | 1.19755700  | 3.26472100  | -2.83387700 |
| C            | 1.84516200  | -1.49956100 | -0.04827100 | C           | 1.48143000  | 3.59256300  | -1.51832400 |
| C            | 2.63828200  | 0.70938600  | -0.09512900 | H           | -0.34047900 | 0.28311400  | -2.30775200 |
| C            | 3.14399800  | -1.98126800 | 0.06397300  | H           | 0.31675900  | 1.79237900  | -4.13340100 |
| C            | 3.95194100  | 0.27105900  | 0.00269800  | H           | 1.48837100  | 3.93306600  | -3.63672000 |
| C            | 4.20555000  | -1.08996400 | 0.09096000  | H           | 1.99239900  | 4.52235900  | -1.28418300 |
| C            | -1.19995300 | -0.56454400 | -0.06448600 | H           | 1.20468900  | 2.19948100  | 1.40813500  |
| C            | -1.26137600 | -1.31200600 | 1.11172700  | B           | -0.00807200 | 0.35954900  | 0.40515900  |
| C            | -2.29112200 | -0.73243700 | -0.90678000 | N           | 1.36912800  | 3.07610900  | 0.89350600  |
| C            | -2.29612100 | -2.17784800 | 1.42613200  | C           | -1.52999800 | -0.14075200 | 0.06679600  |
| C            | -3.35655500 | -1.58464100 | -0.63439300 | C           | -2.00300000 | -1.43425500 | 0.26901500  |

|              |             |             |             |             |             |             |             |
|--------------|-------------|-------------|-------------|-------------|-------------|-------------|-------------|
| C            | -2.51793800 | 0.79185800  | -0.23471000 | H           | -0.86209400 | -2.32894600 | -2.03820200 |
| C            | -3.33215400 | -1.80023700 | 0.10501100  | H           | -2.69102100 | -3.90965600 | -1.54366700 |
| C            | -3.86007400 | 0.47631200  | -0.40559700 | H           | -4.60867200 | -3.20437400 | -0.13364300 |
| C            | -4.26869000 | -0.83807500 | -0.24326200 | H           | -4.66426200 | -0.90509100 | 0.80598400  |
| C            | 1.18805900  | -0.75110700 | 0.16121200  | H           | -1.52986000 | 1.37818700  | -0.28350100 |
| C            | 1.14219700  | -1.79751800 | -0.75810200 | B           | -0.50130900 | 0.29881500  | -1.26882800 |
| C            | 2.43798000  | -0.57867900 | 0.74512800  | N           | -2.72021900 | 0.98912200  | 0.44573100  |
| C            | 2.20420700  | -2.66059200 | -1.00016800 | C           | 0.92230100  | -0.00632600 | -0.57871400 |
| C            | 3.53229300  | -1.40649900 | 0.53883400  | C           | 2.11236900  | 0.27647700  | -1.24415000 |
| C            | 3.40871400  | -2.47282400 | -0.33774800 | C           | 1.07484200  | -0.58618500 | 0.67584900  |
| C            | 2.77298000  | 3.48127700  | 1.17096400  | C           | 3.36769100  | -0.01234000 | -0.72414100 |
| H            | 2.89611500  | 3.57695700  | 2.25072100  | C           | 2.30611800  | -0.89080500 | 1.23897900  |
| H            | 3.43133500  | 2.70603300  | 0.78410900  | C           | 3.46266000  | -0.60904800 | 0.52538600  |
| H            | 2.97480300  | 4.43734800  | 0.68972200  | C           | -3.79814200 | 1.85257700  | -0.05312700 |
| C            | 0.37277900  | 4.06996900  | 1.38720800  | H           | -3.59716500 | 2.88211500  | 0.25806600  |
| H            | 0.48836000  | 4.18773500  | 2.46603400  | H           | -3.82294200 | 1.79910900  | -1.14336200 |
| H            | 0.55159800  | 5.01639200  | 0.87522400  | H           | -4.77429400 | 1.54214000  | 0.33928400  |
| H            | -0.61953900 | 3.69341200  | 1.13909800  | C           | -2.66955100 | 1.00288600  | 1.91657200  |
| F            | 4.69417300  | -1.16838800 | 1.15164300  | H           | -2.49195100 | 2.02444600  | 2.25786600  |
| F            | 4.43880100  | -3.28540600 | -0.56246900 | H           | -3.61336300 | 0.63528500  | 2.33865700  |
| F            | 2.08505100  | -3.65246100 | -1.88160600 | H           | -1.85468300 | 0.35939900  | 2.24793300  |
| F            | 0.05062900  | -2.00211100 | -1.51084900 | F           | 2.08073400  | 0.87602800  | -2.44222500 |
| F            | 2.67468400  | 0.50036600  | 1.54384100  | F           | 4.47610000  | 0.27595400  | -1.40546500 |
| F            | -1.17307200 | -2.40272000 | 0.67992700  | F           | 4.65435000  | -0.89294100 | 1.04336900  |
| F            | -3.72208000 | -3.06061000 | 0.30132800  | F           | 2.38774300  | -1.44102800 | 2.45047100  |
| F            | -5.54960500 | -1.16992300 | -0.39892400 | F           | -0.00533400 | -0.83134300 | 1.44057900  |
| F            | -4.75298900 | 1.42271600  | -0.70612900 | H           | -0.41220300 | 0.36289400  | -2.46313100 |
| F            | -2.20480200 | 2.10247400  | -0.33852500 | C           | -0.74637900 | 2.20100600  | -0.97013000 |
| C            | -0.15202900 | 0.77411600  | 2.03025100  | H           | -1.56234800 | 2.67136000  | -1.53284700 |
| H            | -0.92502500 | 1.54971100  | 2.13354500  | C           | 0.04420000  | 2.63007100  | 1.39541400  |
| H            | 0.75576600  | 1.14451300  | 2.53521500  | H           | 0.02906700  | 1.57457000  | 1.65080600  |
| C            | -1.76239800 | -0.56563800 | 3.42044800  | C           | -0.32362100 | 3.06420100  | 0.19327600  |
| H            | -2.53433400 | 0.19461100  | 3.32166700  | H           | -0.27774200 | 4.13328600  | -0.01432300 |
| C            | -0.56755100 | -0.40894000 | 2.85718200  | H           | 0.38305800  | 3.31892600  | 2.16226300  |
| H            | 0.17435000  | -1.20156200 | 2.95719600  | H           | 0.08747500  | 2.20501600  | -1.67653800 |
| H            | -2.01762100 | -1.45926000 | 3.98008400  |             |             |             |             |
| <b>N4_TS</b> |             |             |             | <b>N4_P</b> |             |             |             |
| C            | -2.77615600 | -0.35985200 | -0.09043700 | C           | 2.56767000  | -0.45517000 | -0.28312600 |
| C            | -1.69047600 | -0.71201300 | -0.88712400 | C           | 1.59806900  | -1.07768700 | 0.50060800  |
| C            | -1.68907500 | -2.01406000 | -1.40636900 | C           | 1.64711800  | -2.48465600 | 0.43657200  |
| C            | -2.72037000 | -2.90506900 | -1.13315800 | C           | 2.57566100  | -3.18296900 | -0.32413300 |
| C            | -3.79941600 | -2.51174000 | -0.34048800 | C           | 3.53356400  | -2.49598400 | -1.06879000 |
| C            | -3.83220600 | -1.22588400 | 0.18433500  | C           | 3.53220700  | -1.10929500 | -1.04661800 |
|              |             |             |             | H           | 0.91622800  | -3.03540200 | 1.02139800  |

|              |             |             |             |   |             |             |             |
|--------------|-------------|-------------|-------------|---|-------------|-------------|-------------|
| H            | 2.56112900  | -4.26844100 | -0.33344500 | C | -2.70082000 | -0.52126000 | 2.46887100  |
| H            | 4.27165700  | -3.03086200 | -1.65658200 | H | -3.78113500 | -0.49625100 | 2.45357500  |
| H            | 4.27049100  | -0.55489900 | -1.61960700 | C | -1.97775000 | -0.40934300 | 1.27440700  |
| H            | 1.69504300  | 1.33412300  | 0.12402600  | N | -2.65746400 | -0.36272400 | -0.02456200 |
| B            | 0.41836600  | -0.41275800 | 1.44869800  | C | -3.46372200 | -1.63633900 | -0.32835200 |
| N            | 2.60254700  | 1.02935900  | -0.26838000 | C | -3.97293300 | -1.54380200 | -1.77479800 |
| C            | -0.96375800 | -0.23146300 | 0.57377100  | H | -3.11025700 | -1.55752300 | -2.44872700 |
| C            | -2.19713700 | -0.61954600 | 1.09486100  | H | -4.54906800 | -2.45165900 | -1.98147900 |
| C            | -1.03332800 | 0.27025200  | -0.71790500 | C | -4.79361900 | -0.29264500 | -2.04322900 |
| C            | -3.39432600 | -0.52600600 | 0.39262200  | H | -5.69346300 | -0.27074900 | -1.41675900 |
| C            | -2.19679700 | 0.38846900  | -1.46442200 | H | -5.13602600 | -0.27900500 | -3.08240800 |
| C            | -3.39493800 | -0.02233500 | -0.89994600 | C | -3.91034300 | 0.91522800  | -1.76955600 |
| C            | 3.65873500  | 1.53249700  | 0.65301300  | H | -4.44691600 | 1.85330100  | -1.94800600 |
| H            | 3.60599700  | 2.62148600  | 0.69160100  | H | -3.06747500 | 0.89686200  | -2.47245500 |
| H            | 3.47767500  | 1.10541000  | 1.63878500  | C | -3.36419800 | 0.96383700  | -0.33331100 |
| H            | 4.62554400  | 1.20184800  | 0.27227400  | C | -4.49874600 | 1.35458100  | 0.63092800  |
| C            | 2.71445000  | 1.66861200  | -1.61032100 | H | -5.37007900 | 0.70377300  | 0.59115700  |
| H            | 2.41400000  | 2.71262700  | -1.50640400 | H | -4.83793500 | 2.35378200  | 0.34257900  |
| H            | 3.74804100  | 1.61101600  | -1.95039200 | H | -4.14497600 | 1.42274500  | 1.66040800  |
| H            | 2.05230000  | 1.14956900  | -2.29825200 | C | -2.34494100 | 2.09917300  | -0.24689700 |
| F            | -2.28539700 | -1.10480600 | 2.33884800  | H | -1.51155700 | 1.96380200  | -0.93613800 |
| F            | -4.54378100 | -0.91405500 | 0.94730000  | H | -1.95809900 | 2.19975900  | 0.76766500  |
| F            | -4.53310600 | 0.07936300  | -1.58544000 | H | -2.84438500 | 3.03442000  | -0.51476300 |
| F            | -2.17702700 | 0.90143400  | -2.69809800 | C | -4.64941700 | -1.94642300 | 0.61067100  |
| F            | 0.09411100  | 0.74134300  | -1.31689600 | H | -4.30356400 | -2.31027900 | 1.57892200  |
| H            | 0.18237100  | -1.28782100 | 2.25115500  | H | -5.21562700 | -2.76069300 | 0.14904200  |
| C            | 0.76862700  | 0.90458800  | 2.40346100  | H | -5.34304400 | -1.12500100 | 0.77297900  |
| H            | 1.63114900  | 0.64664700  | 3.03262000  | C | -2.53560800 | -2.84563500 | -0.22825200 |
| C            | 0.25708100  | 2.95321800  | 0.95946600  | H | -1.74545100 | -2.80990500 | -0.97418200 |
| H            | -0.55303400 | 2.46968100  | 0.42320200  | H | -3.12904400 | -3.74597600 | -0.41338800 |
| C            | 0.94686700  | 2.32259000  | 1.91826300  | H | -2.08599200 | -2.93157700 | 0.76307200  |
| H            | 1.71125300  | 2.91433800  | 2.43042400  | C | 0.85586100  | 1.51809200  | -0.00960900 |
| H            | 0.44357200  | 3.99877100  | 0.73095900  | C | 0.53768800  | 2.47720800  | 0.95398900  |
| H            | -0.07485200 | 0.92998600  | 3.10774500  | F | -0.17566700 | 2.17752600  | 2.04889700  |
| <b>N5-TS</b> |             |             |             | C | 0.88588500  | 3.82161800  | 0.85581100  |
| B            | 0.41784000  | -0.06511700 | 0.06475900  | F | 0.51601400  | 4.67842700  | 1.80629600  |
| C            | -0.57313100 | -0.39694800 | 1.29129400  | C | 1.61678800  | 4.26953900  | -0.22991800 |
| C            | 0.05192800  | -0.58558900 | 2.53505000  | F | 1.95471500  | 5.54942300  | -0.33857500 |
| H            | 1.13866700  | -0.59388600 | 2.57448300  | C | 1.99541000  | 3.35555100  | -1.20212700 |
| C            | -0.65928800 | -0.72314400 | 3.71699700  | F | 2.72705600  | 3.75098100  | -2.24176800 |
| H            | -0.13552200 | -0.85767000 | 4.65789100  | C | 1.62631800  | 2.02824900  | -1.06023900 |
| C            | -2.04891600 | -0.66990700 | 3.68514700  | F | 2.10357200  | 1.19915000  | -2.00789600 |
| H            | -2.62746400 | -0.75222700 | 4.59951000  | C | 1.69878100  | -1.08566600 | 0.05437200  |
|              |             |             |             | C | 3.04715100  | -0.71899400 | 0.10748500  |

|             |             |             |             |   |             |             |             |
|-------------|-------------|-------------|-------------|---|-------------|-------------|-------------|
| F           | 3.43486100  | 0.56101200  | 0.15555500  | H | 5.42966000  | 1.11585100  | -0.72212300 |
| C           | 4.09348000  | -1.63601700 | 0.15420500  | H | 4.79126600  | 2.71690500  | -0.40420700 |
| F           | 5.35390900  | -1.21026900 | 0.20488100  | H | 4.09608000  | 1.77004100  | -1.70646100 |
| C           | 3.82500000  | -2.99429600 | 0.17065900  | C | 2.34520400  | 2.26269900  | 0.30379400  |
| F           | 4.81543900  | -3.87770600 | 0.21774700  | H | 1.49499800  | 1.96711200  | 0.91894000  |
| C           | 2.50423400  | -3.41481600 | 0.15015100  | H | 1.98494200  | 2.44443300  | -0.70836400 |
| F           | 2.21420300  | -4.71428000 | 0.18607100  | H | 2.74266300  | 3.19868600  | 0.70572000  |
| C           | 1.49434000  | -2.46526900 | 0.10974000  | C | 4.84392800  | -1.58889800 | -0.90097500 |
| F           | 0.24564900  | -2.95449300 | 0.12102300  | H | 4.40885900  | -1.89124500 | -1.85289800 |
| H           | -1.43521700 | -0.39229500 | -0.81481300 | H | 5.48632600  | -2.40866300 | -0.56811000 |
| C           | -0.43169100 | -0.35389400 | -1.72975000 | H | 5.48266700  | -0.72252800 | -1.05695300 |
| H           | -0.97348000 | 0.43019900  | -2.27626100 | C | 2.87538600  | -2.65612000 | 0.13807600  |
| H           | 0.59018100  | 0.00879500  | -1.84142800 | H | 2.12092900  | -2.63017100 | 0.92418500  |
| C           | -0.94037700 | -1.76718300 | -3.73977900 | H | 3.50954700  | -3.53232200 | 0.30190500  |
| H           | -1.46415800 | -0.94950400 | -4.23075900 | H | 2.37668900  | -2.76450200 | -0.82665100 |
| C           | -0.41160500 | -1.62691500 | -2.52577200 | C | -1.08956800 | 1.46523600  | 0.13861300  |
| H           | 0.11655400  | -2.46890400 | -2.08539400 | C | -0.74297500 | 2.45480500  | -0.78340100 |
| H           | -0.86473300 | -2.70156400 | -4.28538700 | F | 0.14249600  | 2.23767900  | -1.77790400 |
| <b>N5_P</b> |             |             |             | C | -1.24391300 | 3.75533200  | -0.77391600 |
| B           | -0.45325200 | -0.08524100 | 0.25744900  | F | -0.83560600 | 4.63626600  | -1.69057100 |
| C           | 0.57225600  | -0.30469600 | -1.04980600 | C | -2.16718400 | 4.13242700  | 0.18215500  |
| C           | -0.11759100 | -0.46779400 | -2.27168700 | F | -2.66291200 | 5.36767400  | 0.20413100  |
| H           | -1.20026900 | -0.54250300 | -2.23119000 | C | -2.57219700 | 3.18973600  | 1.11492800  |
| C           | 0.48860000  | -0.48614200 | -3.51548400 | F | -3.47688700 | 3.51537000  | 2.03852400  |
| H           | -0.11257900 | -0.60245300 | -4.41162100 | C | -2.03978400 | 1.91049400  | 1.06777300  |
| C           | 1.86729300  | -0.32341700 | -3.60860500 | F | -2.54635300 | 1.06657200  | 1.98488500  |
| H           | 2.36815300  | -0.30398700 | -4.57052400 | C | -1.64396100 | -1.23911400 | 0.07466400  |
| C           | 2.60347200  | -0.19403100 | -2.44321800 | C | -3.01691400 | -1.05156000 | -0.09425300 |
| H           | 3.67621300  | -0.08336800 | -2.51117100 | F | -3.56235800 | 0.16815000  | -0.19809800 |
| C           | 1.96456800  | -0.21709500 | -1.19795600 | C | -3.93512000 | -2.09209700 | -0.22287500 |
| N           | 2.84296700  | -0.16652400 | 0.01064800  | F | -5.23292500 | -1.82531500 | -0.37277500 |
| C           | 3.77321100  | -1.42295200 | 0.18143500  | C | -3.50029500 | -3.40574700 | -0.22216300 |
| C           | 4.41405200  | -1.32118100 | 1.57403500  | F | -4.36424600 | -4.41035700 | -0.35032000 |
| H           | 3.63203400  | -1.48338900 | 2.32313800  | C | -2.14163500 | -3.65360900 | -0.10508600 |
| H           | 5.11574800  | -2.15592800 | 1.66567600  | F | -1.68350100 | -4.90691800 | -0.13375500 |
| C           | 5.10162100  | 0.00830500  | 1.85497300  | C | -1.27001500 | -2.58245700 | 0.02274700  |
| H           | 5.94952700  | 0.16433300  | 1.17813600  | F | 0.03665000  | -2.91516600 | 0.07738600  |
| H           | 5.51102500  | 0.00152800  | 2.86911400  | H | 2.17373000  | -0.29007900 | 0.78620000  |
| C           | 4.08520600  | 1.13617300  | 1.71751100  | C | 0.09481200  | -0.17173300 | 1.83931400  |
| H           | 4.53514800  | 2.10794200  | 1.94426500  | H | 0.81618900  | 0.62015900  | 2.09546200  |
| H           | 3.27566500  | 0.98561100  | 2.44595000  | H | -0.79674300 | 0.11124400  | 2.40510300  |
| C           | 3.47225300  | 1.23308900  | 0.31558400  | C | 1.48076700  | -1.50267300 | 3.46218300  |
| C           | 4.51352200  | 1.70188700  | -0.70210400 | H | 1.99867200  | -0.61056900 | 3.81310300  |
|             |             |             |             | C | 0.55276300  | -1.43636000 | 2.50431900  |

|   |            |             |            |
|---|------------|-------------|------------|
| H | 0.03374200 | -2.35435600 | 2.23728600 |
| H | 1.72882100 | -2.43654600 | 3.95732300 |

# N6\_TS

|   |             |             |             |
|---|-------------|-------------|-------------|
| C | -1.48274600 | 1.44904200  | -0.17323100 |
| C | -1.34119100 | 0.08497600  | 0.09720900  |
| C | -2.44457800 | -0.71180700 | 0.42364400  |
| C | -3.71606400 | -0.15062000 | 0.45903400  |
| C | -3.88489900 | 1.20057300  | 0.16380200  |
| C | -2.77940800 | 1.98254200  | -0.14452300 |
| H | -2.32139500 | -1.76198500 | 0.65718600  |
| H | -4.56996000 | -0.76942400 | 0.71530400  |
| H | -4.87765500 | 1.64026900  | 0.18096000  |
| H | -2.91321000 | 3.03890800  | -0.36252300 |
| C | 0.68221600  | -0.75824800 | 1.31358200  |
| C | 0.20046800  | -1.39520300 | -1.18278300 |
| C | 2.13279800  | -1.20136400 | 1.06004400  |
| C | 1.68285000  | -1.79285800 | -1.29621300 |
| C | 2.26091000  | -2.30271400 | 0.01699800  |
| H | 2.55699600  | -1.51217800 | 2.02081400  |
| H | 2.71470600  | -0.33091300 | 0.73218800  |
| H | 1.76299900  | -2.54843400 | -2.08458000 |
| H | 2.27189400  | -0.93306700 | -1.63607900 |
| H | 3.31178300  | -2.57810100 | -0.11445400 |
| H | 1.73724100  | -3.20959600 | 0.34267300  |
| N | 0.02505700  | -0.42272300 | -0.01920000 |
| C | -0.04876200 | -1.82774300 | 2.14047000  |
| H | -1.04927400 | -1.49475400 | 2.42006400  |
| H | -0.12416800 | -2.79561000 | 1.64378300  |
| H | 0.51385900  | -1.98114400 | 3.06621600  |
| C | 0.72094300  | 0.52039500  | 2.15907600  |
| H | 1.17878500  | 0.28466900  | 3.12432500  |
| H | 1.31646400  | 1.30490600  | 1.68462600  |
| H | -0.28307700 | 0.91169300  | 2.34110000  |
| C | -0.64726700 | -2.68008600 | -1.10631300 |
| H | -1.70892300 | -2.46490700 | -1.22823600 |
| H | -0.35049000 | -3.32482600 | -1.93902300 |
| H | -0.50729700 | -3.24953600 | -0.18773300 |
| C | -0.21705800 | -0.67679200 | -2.47172800 |
| H | 0.38284200  | 0.21575800  | -2.65602900 |
| H | -0.07169100 | -1.35940700 | -3.31420900 |
| H | -1.26971700 | -0.38650900 | -2.44364300 |
| B | -0.24513500 | 2.44240700  | -0.35851400 |
| H | 0.61377300  | 0.88044400  | -0.42485300 |

|   |             |            |             |
|---|-------------|------------|-------------|
| H | 0.05406700  | 2.93670600 | 0.69748500  |
| H | -0.40253200 | 3.24660400 | -1.23887200 |
| C | 1.46151800  | 1.82095400 | -0.98644000 |
| H | 2.07737400  | 0.91332100 | -0.94950000 |
| H | 1.28967800  | 2.00362000 | -2.04824100 |
| C | 3.44430000  | 2.69458200 | 0.27756800  |
| H | 3.86796100  | 1.69893300 | 0.38778600  |
| C | 2.29915500  | 2.90176200 | -0.36997700 |
| H | 1.91086400  | 3.91326400 | -0.46231200 |
| H | 3.99926800  | 3.51398300 | 0.72144300  |

# N6\_P

|   |             |             |             |
|---|-------------|-------------|-------------|
| C | -1.00582300 | 1.73705300  | -0.07435900 |
| C | -1.28520100 | 0.37475700  | 0.08964100  |
| C | -2.56301500 | -0.15358400 | 0.29448500  |
| C | -3.65069300 | 0.70693500  | 0.31627200  |
| C | -3.43830800 | 2.07281100  | 0.12702600  |
| C | -2.15256100 | 2.55920500  | -0.05907500 |
| H | -2.71729000 | -1.21561800 | 0.44129500  |
| H | -4.64909300 | 0.31328800  | 0.47458900  |
| H | -4.28225600 | 2.75629200  | 0.13100200  |
| H | -1.99853900 | 3.62619100  | -0.19106300 |
| C | 0.36727400  | -1.14024200 | 1.34850000  |
| C | -0.08928900 | -1.41702600 | -1.27697600 |
| C | 1.69482000  | -1.86855300 | 1.08787100  |
| C | 1.28989500  | -2.08743100 | -1.34596300 |
| C | 1.65038800  | -2.84904000 | -0.07644500 |
| H | 1.97849900  | -2.36770500 | 2.01992500  |
| H | 2.46957500  | -1.11591000 | 0.88736000  |
| H | 1.28871700  | -2.74602200 | -2.22012300 |
| H | 2.05082600  | -1.31788600 | -1.53179500 |
| H | 2.62717300  | -3.32632500 | -0.19448000 |
| H | 0.93016300  | -3.65347600 | 0.11362500  |
| N | -0.11021900 | -0.53581000 | 0.00101700  |
| C | -0.66167300 | -2.06145400 | 1.99906100  |
| H | -1.57664700 | -1.52057400 | 2.24237900  |
| H | -0.91098500 | -2.94391600 | 1.40957600  |
| H | -0.22875000 | -2.41071200 | 2.94056400  |
| C | 0.63259500  | 0.04041300  | 2.28407700  |
| H | 1.05483500  | -0.35407900 | 3.21267000  |
| H | 1.34113700  | 0.75282800  | 1.85165900  |
| H | -0.28523800 | 0.58389100  | 2.51822600  |
| C | -1.20156600 | -2.46498000 | -1.33459100 |
| H | -2.18438500 | -2.00207900 | -1.41801600 |

|              |             |             |             |   |             |             |             |
|--------------|-------------|-------------|-------------|---|-------------|-------------|-------------|
| H            | -1.03838700 | -3.04818500 | -2.24545500 | C | -1.75668700 | -2.69172200 | 1.21987900  |
| H            | -1.20255600 | -3.16280600 | -0.49820200 | H | -2.75090800 | -3.09253000 | 1.44256000  |
| C            | -0.25654100 | -0.47305200 | -2.46928600 | H | -1.01624100 | -3.23766200 | 1.80505700  |
| H            | 0.48557200  | 0.32840100  | -2.45498200 | H | -1.53923100 | -2.79336900 | 0.15784500  |
| H            | -0.11713200 | -1.05569400 | -3.38431000 | C | 0.53068900  | -1.19984100 | -0.69904800 |
| H            | -1.25094000 | -0.02328400 | -2.48930600 | C | 1.43791800  | -2.28469600 | -0.51600000 |
| B            | 0.45319200  | 2.49987800  | -0.08434300 | C | 1.17934000  | -3.54050200 | -1.06573400 |
| H            | 0.63577400  | 0.15201700  | -0.19504700 | H | 1.87959900  | -4.35139200 | -0.87106600 |
| H            | 0.68477000  | 2.71418800  | 1.09633400  | C | 0.09119500  | -3.77342500 | -1.90412100 |
| H            | 0.28416400  | 3.57020700  | -0.63745900 | C | -0.68108900 | -2.67153100 | -2.24287000 |
| C            | 1.82429800  | 1.84622700  | -0.79202500 | H | -1.47081500 | -2.78668700 | -2.98426900 |
| H            | 2.12459400  | 0.79728900  | -0.59695700 | C | -0.47374700 | -1.40264300 | -1.68132800 |
| H            | 1.73962600  | 1.92518600  | -1.88621500 | C | 2.81343100  | -2.13509900 | 0.10813100  |
| C            | 4.07290600  | 2.21288200  | 0.28720500  | H | 3.16832900  | -3.09559200 | 0.49280000  |
| H            | 4.21041600  | 1.14936700  | 0.47729500  | H | 2.88594100  | -1.39829600 | 0.90199700  |
| C            | 2.98890000  | 2.66964800  | -0.33799200 | H | 3.51709000  | -1.81371200 | -0.66916900 |
| H            | 2.88652200  | 3.74302600  | -0.50047000 | C | -0.19424900 | -5.14517900 | -2.45669200 |
| H            | 4.85697800  | 2.87596900  | 0.63743500  | H | 0.73154700  | -5.68362400 | -2.67680600 |
| <b>N8_TS</b> |             |             |             | H | -0.78339700 | -5.08785400 | -3.37530100 |
| C            | -3.85241200 | 3.79175300  | -1.00536200 | H | -0.75952000 | -5.74921800 | -1.73852800 |
| H            | -3.78329300 | 4.18046000  | -2.02517200 | C | -1.31921000 | -0.31317700 | -2.32182600 |
| H            | -4.04299400 | 4.64890500  | -0.35162300 | H | -1.31951800 | -0.47751700 | -3.40400800 |
| C            | -4.97300300 | 2.71825100  | -0.86600700 | H | -0.94426700 | 0.69261900  | -2.14166900 |
| H            | -5.79486700 | 3.06299600  | -0.23171400 | H | -2.36263800 | -0.34845700 | -1.98951100 |
| H            | -5.40741200 | 2.46870100  | -1.83924100 | C | 2.15485100  | 0.93650100  | 0.00429700  |
| C            | -4.75705800 | 0.27709800  | 0.08829600  | C | 2.87197600  | 0.86197100  | -1.22091200 |
| H            | -5.80339200 | 0.00919500  | -0.01970500 | C | 4.14597000  | 1.42087500  | -1.33748900 |
| C            | -3.84834000 | -0.64562700 | 0.65875200  | H | 4.66991100  | 1.33058300  | -2.28771400 |
| H            | -4.23445100 | -1.59208800 | 1.02571300  | C | 4.75858400  | 2.10950800  | -0.29472600 |
| C            | -2.50545100 | -0.36617100 | 0.80120200  | C | 4.01065100  | 2.29686000  | 0.85799800  |
| C            | -0.54406800 | 1.20240500  | 0.21064600  | H | 4.41966000  | 2.90329000  | 1.66507900  |
| C            | -0.28789700 | 2.50195000  | -0.21651500 | C | 2.73147100  | 1.75173200  | 1.01051000  |
| H            | 0.74919800  | 2.80207800  | -0.32684100 | C | 2.31047200  | 0.25858700  | -2.49424400 |
| C            | -1.27009300 | 3.45426200  | -0.59561700 | H | 1.26404200  | 0.53391100  | -2.64338700 |
| H            | -0.95863700 | 4.44084300  | -0.92694500 | H | 2.35925200  | -0.83387700 | -2.51242200 |
| C            | -4.27974800 | 1.51086500  | -0.26998400 | H | 2.87694100  | 0.63343300  | -3.35085300 |
| C            | -1.93991600 | 0.85711400  | 0.33631900  | C | 6.15515300  | 2.65727900  | -0.43203400 |
| C            | -2.58361000 | 3.07662600  | -0.59254800 | H | 6.90170800  | 1.87200200  | -0.27284000 |
| C            | -2.90043600 | 1.77887500  | -0.13534100 | H | 6.34445200  | 3.44666200  | 0.29971900  |
| C            | -2.07205600 | -1.09747900 | 3.02896600  | H | 6.32319100  | 3.06909900  | -1.43109100 |
| H            | -1.95996100 | -0.04620800 | 3.29909400  | C | 2.01107000  | 2.15526700  | 2.28500900  |
| H            | -1.42080700 | -1.71486800 | 3.64611900  | H | 2.21821800  | 3.20885400  | 2.49438600  |
| H            | -3.11665000 | -1.39439800 | 3.16069300  | H | 2.35206700  | 1.57986400  | 3.15242400  |
|              |             |             |             | H | 0.93062100  | 2.03813400  | 2.20565800  |

|      |             |             |             |   |             |             |             |
|------|-------------|-------------|-------------|---|-------------|-------------|-------------|
| B    | 0.71288900  | 0.16589100  | 0.18718700  | H | -1.76133200 | 4.71213600  | 0.73078800  |
| N    | -1.67948600 | -1.26326400 | 1.60509400  | C | -1.60914700 | 4.02428100  | -1.28621600 |
| H    | -0.45324300 | -0.88344600 | 1.58151300  | C | -1.44060900 | 2.87922800  | -2.05795800 |
| C    | 0.84166200  | -0.63632500 | 2.17880800  | H | -1.51342400 | 2.95956500  | -3.14162800 |
| H    | 1.82604400  | -0.22936100 | 1.96527100  | C | -1.20914800 | 1.62217700  | -1.49470500 |
| C    | 0.97078000  | -2.41265800 | 3.97030800  | C | -1.50408000 | 2.61094000  | 2.19957400  |
| H    | 0.73198300  | -1.70461400 | 4.76154300  | H | -0.63469100 | 2.23177600  | 2.73347000  |
| C    | 1.06314500  | -2.02909400 | 2.69421900  | H | -2.35652400 | 2.00094600  | 2.51250300  |
| H    | 1.32114300  | -2.78829000 | 1.95712300  | H | -1.68672200 | 3.63046900  | 2.54880000  |
| H    | 1.15402300  | -3.44013100 | 4.26882400  | C | -1.86909800 | 5.36715300  | -1.91795600 |
| H    | 0.45352100  | -0.00069900 | 2.98520700  | H | -1.11497400 | 5.60399500  | -2.67454000 |
| N8_P |             |             |             | H | -1.86451400 | 6.16444000  | -1.17094700 |
| C    | 4.06376100  | -3.10415400 | -1.73215200 | H | -2.84306200 | 5.38197000  | -2.41698000 |
| H    | 4.23419400  | -3.09349700 | -2.81343000 | C | -1.17116500 | 0.48002900  | -2.48581700 |
| H    | 4.04807900  | -4.15344500 | -1.42447000 | H | -1.66026900 | 0.78351300  | -3.41511700 |
| C    | 5.16214900  | -2.29522600 | -0.98192500 | H | -1.69596300 | -0.39348700 | -2.09397500 |
| H    | 5.61627500  | -2.89109300 | -0.18380900 | H | -0.15211200 | 0.16688400  | -2.72815600 |
| H    | 5.97328700  | -1.98351400 | -1.64577200 | C | -2.03232000 | -1.20119300 | 0.33886200  |
| C    | 4.90568500  | 0.00682100  | 0.24497900  | C | -3.37768100 | -0.82387300 | 0.04995500  |
| H    | 5.96279200  | 0.16548200  | 0.42999000  | C | -4.39229900 | -1.77767600 | -0.08855700 |
| C    | 3.96535800  | 1.00074500  | 0.61277500  | H | -5.39889100 | -1.43476200 | -0.32142100 |
| H    | 4.33006100  | 1.93064200  | 1.03681800  | C | -4.17490900 | -3.13811800 | 0.07739500  |
| C    | 2.61974600  | 0.81523800  | 0.42410800  | C | -2.89461500 | -3.51387500 | 0.44897100  |
| C    | 0.64002500  | -0.71235600 | -0.32397700 | H | -2.68798200 | -4.56576500 | 0.64604200  |
| C    | 0.46192200  | -1.80172100 | -1.17941800 | C | -1.85142000 | -2.59315300 | 0.59718900  |
| H    | -0.55770500 | -2.09489500 | -1.40426500 | C | -3.87596800 | 0.60530100  | -0.07605700 |
| C    | 1.46762000  | -2.63068200 | -1.72882300 | H | -3.57708400 | 1.09029400  | -1.00860800 |
| H    | 1.18254300  | -3.46082100 | -2.36963200 | H | -3.52063900 | 1.23670300  | 0.73898000  |
| C    | 4.43275100  | -1.10475600 | -0.39533700 | H | -4.96827900 | 0.60825300  | -0.04078300 |
| C    | 2.03735000  | -0.36363800 | -0.14598000 | C | -5.27501600 | -4.14711700 | -0.12469300 |
| C    | 2.77140600  | -2.39734800 | -1.38640500 | H | -6.24742900 | -3.73493300 | 0.15826300  |
| C    | 3.04003900  | -1.25472200 | -0.61029000 | H | -5.10011700 | -5.04797500 | 0.46946300  |
| C    | 2.04381200  | 2.88615700  | 1.74330400  | H | -5.34263900 | -4.45329300 | -1.17439700 |
| H    | 2.22496800  | 2.28358200  | 2.62993800  | C | -0.57147700 | -3.27193800 | 1.08032900  |
| H    | 1.18128900  | 3.54107900  | 1.87923600  | H | -0.28350200 | -4.06753000 | 0.38400300  |
| H    | 2.91889800  | 3.48392000  | 1.49027900  | H | -0.76542100 | -3.74619700 | 2.04941200  |
| C    | 1.67630900  | 2.75473100  | -0.67244700 | H | 0.28958100  | -2.62203900 | 1.19058400  |
| H    | 2.66809900  | 3.17805700  | -0.83419600 | B | -0.74460200 | -0.12072900 | 0.51074300  |
| H    | 0.91098900  | 3.52635300  | -0.58080800 | N | 1.73053700  | 1.97653900  | 0.60817300  |
| H    | 1.41832400  | 2.06555200  | -1.47354800 | H | 0.77571600  | 1.60409600  | 0.75919400  |
| C    | -1.10856600 | 1.42824100  | -0.08300900 | C | -0.49934700 | -0.25589500 | 2.19544400  |
| C    | -1.35236400 | 2.60076400  | 0.69009200  | H | -1.40553700 | 0.13667800  | 2.66395300  |
| C    | -1.57587500 | 3.85143700  | 0.09036900  | C | 1.85653700  | -0.44996900 | 3.10525500  |
|      |             |             |             | H | 2.05744100  | -1.36331500 | 2.54973000  |



|               |             |             |             |              |             |             |             |
|---------------|-------------|-------------|-------------|--------------|-------------|-------------|-------------|
| C             | 0.68875300  | 0.19069000  | 3.00057600  | C            | -0.61503900 | 1.35068300  | -2.70149500 |
| H             | 0.57752700  | 1.08394200  | 3.62108800  | H            | -0.83936800 | 2.02892200  | -3.52867100 |
| H             | 2.65319700  | -0.08659400 | 3.74905600  | H            | -1.55562700 | 0.89491500  | -2.37861000 |
| H             | -0.56390400 | -1.32846500 | 2.36922700  | H            | 0.02411700  | 0.55162000  | -3.08630500 |
| <b>N10_TS</b> |             |             |             | C            | -2.04942800 | -0.20298200 | 0.21561800  |
| C             | 3.82030400  | -3.35744800 | 0.00705700  | C            | -3.02810800 | 0.83821900  | 0.18696800  |
| H             | 4.68535000  | -3.94706900 | 0.29048600  | C            | -4.39513900 | 0.54836500  | 0.25458400  |
| C             | 3.65952500  | -2.05574400 | 0.53360200  | H            | -5.10255000 | 1.37422500  | 0.22125500  |
| H             | 4.42466100  | -1.64707700 | 1.18376200  | C            | -4.88767600 | -0.74283500 | 0.37186700  |
| C             | 2.56063700  | -1.30934400 | 0.19371800  | C            | -3.94864300 | -1.75759900 | 0.44384400  |
| C             | 0.27857300  | -1.09294300 | -0.90705300 | H            | -4.29133000 | -2.78469500 | 0.56456500  |
| C             | -0.51538900 | -1.63868800 | -1.90268500 | C            | -2.57152500 | -1.52320900 | 0.37423500  |
| H             | -1.47436400 | -1.17784600 | -2.11288500 | C            | -2.74229800 | 2.32771900  | 0.10240400  |
| C             | -0.22095300 | -2.83436900 | -2.59140900 | H            | -2.33434100 | 2.63180000  | -0.86419100 |
| H             | -0.90711300 | -3.19407400 | -3.35210300 | H            | -2.03883600 | 2.66758100  | 0.86160500  |
| C             | 2.91206200  | -3.83358000 | -0.89564700 | H            | -3.67494700 | 2.87692900  | 0.25029000  |
| C             | 1.51630900  | -1.80200200 | -0.65522200 | C            | -6.36668300 | -1.02408500 | 0.40797500  |
| C             | 0.87454700  | -3.57214100 | -2.23921300 | H            | -6.77136100 | -1.12652200 | -0.60465100 |
| C             | 1.76810200  | -3.07242000 | -1.26082600 | H            | -6.91121400 | -0.21274300 | 0.89808000  |
| C             | 3.36303800  | 0.56276100  | 1.62469900  | H            | -6.58032800 | -1.95283400 | 0.94319600  |
| H             | 3.26637200  | -0.04031800 | 2.52303500  | C            | -1.79527200 | -2.83096300 | 0.52304400  |
| H             | 3.09155300  | 1.59591800  | 1.85032500  | H            | -2.15661100 | -3.55191000 | -0.21770900 |
| H             | 4.39683500  | 0.54073300  | 1.26304000  | H            | -2.00152700 | -3.25549000 | 1.51231000  |
| C             | 2.78378400  | 0.88693500  | -0.65705900 | H            | -0.71970000 | -2.77911900 | 0.39877900  |
| H             | 3.82321500  | 0.65495700  | -0.91480200 | B            | -0.42156500 | 0.08422300  | 0.05837100  |
| H             | 2.67005600  | 1.95033200  | -0.44875800 | N            | 2.44391800  | 0.09240000  | 0.56657000  |
| H             | 2.13249100  | 0.60246200  | -1.47785800 | H            | 1.18884000  | 0.04784500  | 1.04086900  |
| C             | 0.03706600  | 1.64750900  | -0.23245300 | H            | 1.08314400  | -4.53352000 | -2.69994600 |
| C             | 0.47783500  | 2.58605200  | 0.74043000  | H            | 3.04801900  | -4.80859200 | -1.35501400 |
| C             | 1.00585200  | 3.82507100  | 0.35969800  | C            | 0.07381800  | -0.52072100 | 1.90533700  |
| H             | 1.33673100  | 4.51165400  | 1.13699000  | H            | -0.69650000 | 0.08855500  | 2.37153500  |
| C             | 1.10128100  | 4.22469300  | -0.96865900 | H            | -0.38366100 | -1.46787900 | 1.64067300  |
| C             | 0.56297800  | 3.36268500  | -1.91493200 | C            | 1.07029400  | -0.44314800 | 4.22544300  |
| H             | 0.54224900  | 3.66799000  | -2.95973900 | H            | 0.36957700  | 0.32086100  | 4.55259700  |
| C             | 0.02777000  | 2.11927200  | -1.56980100 | C            | 1.05545200  | -0.91434800 | 2.97749100  |
| C             | 0.34004400  | 2.40232400  | 2.23965000  | H            | 1.76201800  | -1.70275100 | 2.71299200  |
| H             | 0.99788800  | 1.64000800  | 2.66119100  | H            | 1.76995400  | -0.82208100 | 4.96387300  |
| H             | -0.68330000 | 2.13036600  | 2.51520300  | <b>N10-P</b> |             |             |             |
| H             | 0.56980600  | 3.34459200  | 2.74308300  | C            | 4.20786500  | -2.95607900 | -0.16356800 |
| C             | 1.72421200  | 5.54028600  | -1.35530800 | H            | 5.16351800  | -3.43093800 | 0.02699800  |
| H             | 2.80313400  | 5.43468300  | -1.51282200 | C            | 3.98868700  | -1.62465900 | 0.25141700  |
| H             | 1.57910200  | 6.29186000  | -0.57501200 | H            | 4.80109600  | -1.07144100 | 0.70754000  |
| H             | 1.29398600  | 5.92376400  | -2.28393800 | C            | 2.76777800  | -1.04192700 | 0.04621800  |

|   |             |             |             |        |             |             |             |
|---|-------------|-------------|-------------|--------|-------------|-------------|-------------|
| C | -0.28951300 | -1.17114400 | -0.62319600 | C      | -2.72003700 | -1.59313000 | 0.46317200  |
| C | -0.50610300 | -1.84159500 | -1.54378800 | C      | -2.80861000 | 2.24430200  | 0.45255000  |
| H | -1.52192300 | -1.49289500 | -1.68961500 | H      | -2.42514000 | 2.68811700  | -0.47033400 |
| C | -0.15232300 | -3.02276100 | -2.22723100 | H      | -2.06614200 | 2.43206800  | 1.22948000  |
| H | -0.86561600 | -3.47544400 | -2.90968700 | H      | -3.71759200 | 2.78673600  | 0.72535000  |
| C | 3.22752600  | -3.59236200 | -0.86974500 | C      | -6.48436100 | -1.06520300 | 0.03339300  |
| C | 1.64188000  | -1.70143900 | -0.54809900 | H      | -6.79535900 | -1.93603000 | 0.61728800  |
| C | 1.03778800  | -3.63583000 | -1.95349400 | H      | -6.73341300 | -1.26831300 | -1.01402500 |
| C | 1.96761900  | -2.98003900 | -1.11469800 | H      | -7.08273200 | -0.20798700 | 0.35290700  |
| C | 3.53573300  | 1.03200300  | 1.26491300  | C      | -1.94243200 | -2.87754700 | 0.73853900  |
| H | 3.41668600  | 0.48604400  | 2.19996300  | H      | -2.11852400 | -3.60920600 | -0.05766000 |
| H | 3.21352400  | 2.06846500  | 1.37605600  | H      | -2.31391100 | -3.31938800 | 1.67037800  |
| H | 4.56509000  | 1.00489200  | 0.90835800  | H      | -0.86650800 | -2.76108400 | 0.82905300  |
| C | 2.84756200  | 1.10146900  | -1.07794200 | B      | -0.50071100 | -0.05277000 | 0.43813300  |
| H | 3.87561300  | 0.91053500  | -1.38828900 | N      | 2.64951900  | 0.41497000  | 0.24204500  |
| H | 2.65021600  | 2.16641300  | -0.94622700 | H      | 1.67011300  | 0.61531200  | 0.51596300  |
| H | 2.14277100  | 0.67557300  | -1.78931600 | H      | 1.30151400  | -4.59787200 | -2.38322000 |
| C | -0.04816700 | 1.52724900  | -0.01239200 | H      | 3.39639500  | -4.58611000 | -1.27514000 |
| C | 0.51211100  | 2.52783400  | 0.83496700  | C      | -0.21073400 | -0.51286800 | 2.05207300  |
| C | 0.92435500  | 3.77504700  | 0.34026400  | H      | -0.54612900 | 0.27970600  | 2.72468700  |
| H | 1.34531500  | 4.49903200  | 1.03631600  | H      | -0.94758100 | -1.30377000 | 2.21440300  |
| C | 0.78299300  | 4.13303300  | -0.99367800 | C      | 1.75574700  | -0.75199200 | 3.65200600  |
| C | 0.18647400  | 3.19247600  | -1.82533500 | H      | 1.45525100  | 0.09093800  | 4.27065100  |
| H | 0.01974700  | 3.44557500  | -2.87130100 | C      | 1.05768900  | -1.11712600 | 2.57010300  |
| C | -0.22540500 | 1.93762400  | -1.36852700 | H      | 1.39968800  | -2.01002800 | 2.04395500  |
| C | 0.66510100  | 2.38071100  | 2.33686000  | H      | 2.62656600  | -1.31396100 | 3.97926300  |
| H | 1.21372700  | 1.48784100  | 2.63737100  |        |             |             |             |
| H | -0.31208600 | 2.33164700  | 2.82757300  | N11_TS |             |             |             |
| H | 1.19077600  | 3.24851400  | 2.74517700  | B      | 0.05070800  | -0.18540500 | 0.06638300  |
| C | 1.19630300  | 5.48910700  | -1.50331600 | N      | -1.93543300 | -2.29606500 | 0.25257000  |
| H | 1.63683700  | 5.42086100  | -2.50182000 | C      | -0.99236600 | -2.24028500 | 1.40483900  |
| H | 1.92464800  | 5.95878600  | -0.83749200 | H      | -0.16776400 | -2.90420500 | 1.12808900  |
| H | 0.33260800  | 6.15842700  | -1.57324500 | C      | -0.44656600 | -0.81517500 | 1.51344100  |
| C | -0.93134200 | 1.09285900  | -2.40543800 | H      | -1.29084100 | -0.19388900 | 1.85906700  |
| H | -1.29339800 | 1.73096700  | -3.21563700 | C      | 0.46571400  | -0.96864200 | 2.74759900  |
| H | -1.78887000 | 0.57425500  | -1.97367200 | H      | 1.41832500  | -1.42628200 | 2.46478800  |
| H | -0.27425800 | 0.33707400  | -2.84512100 | H      | 0.68552400  | -0.00990300 | 3.21798500  |
| C | -2.16866000 | -0.28129400 | 0.36486300  | C      | -0.32729600 | -1.93192300 | 3.69304600  |
| C | -3.13140700 | 0.76646900  | 0.32293100  | H      | 0.33268400  | -2.69273100 | 4.11714000  |
| C | -4.50112200 | 0.49503200  | 0.22144300  | H      | -0.76850000 | -1.385      |             |

|   |             |             |             |              |             |             |             |
|---|-------------|-------------|-------------|--------------|-------------|-------------|-------------|
| H | -2.58243400 | -4.28374100 | 0.52682700  | H            | 0.06104000  | -2.16849000 | -1.37025000 |
| H | -1.11007100 | -4.09165800 | -0.44397500 |              |             |             |             |
| C | -2.96102500 | -3.72414700 | -1.53474800 | <b>N_P11</b> |             |             |             |
| H | -3.08482000 | -4.76776500 | -1.84027200 | B            | -0.00978800 | -0.08692900 | -0.09671900 |
| H | -2.43216700 | -3.21488100 | -2.35027700 | N            | -3.12780600 | -1.30671400 | 0.10843900  |
| C | -4.31959200 | -3.05494100 | -1.29990500 | C            | -2.10447800 | -1.39846700 | 1.23177400  |
| H | -4.90810000 | -3.04913300 | -2.22151500 | H            | -1.63286600 | -2.36647900 | 1.05376300  |
| H | -4.88667200 | -3.63183800 | -0.55637500 | C            | -1.05015800 | -0.29077100 | 1.19297100  |
| C | -4.10927400 | -1.62611700 | -0.78930600 | H            | -1.61975000 | 0.65013100  | 1.27284600  |
| H | -3.64124100 | -1.01052100 | -1.56498300 | C            | -0.43324000 | -0.47142200 | 2.58942600  |
| H | -5.06750500 | -1.15307000 | -0.55253300 | H            | 0.21386300  | -1.35303800 | 2.59956400  |
| C | -3.24697000 | -1.61421100 | 0.47453500  | H            | 0.17952100  | 0.38565900  | 2.87739300  |
| H | -3.04118100 | -0.58976800 | 0.79601000  | C            | -1.64180200 | -0.68774100 | 3.52105400  |
| H | -3.77116300 | -2.13280100 | 1.28773600  | H            | -1.39731300 | -1.29047100 | 4.39830800  |
| C | -0.66640000 | 1.28865800  | -0.02468400 | H            | -2.01227500 | 0.27502600  | 3.88382500  |
| F | 0.75238600  | 1.96457900  | 1.77669100  | C            | -2.72738100 | -1.36561500 | 2.64143700  |
| C | -0.28282800 | 2.25266200  | 0.91255800  | H            | -3.65314200 | -0.77984400 | 2.65470700  |
| F | -0.43362200 | 4.39032500  | 1.97709300  | H            | -2.98100300 | -2.36971700 | 2.99241700  |
| C | -0.86952300 | 3.49778100  | 1.03701300  | C            | -4.10963900 | -2.43560100 | 0.16268000  |
| F | -2.52769000 | 5.05959600  | 0.31007400  | H            | -4.71286900 | -2.27860600 | 1.06217700  |
| C | -1.92421600 | 3.83827200  | 0.20063900  | H            | -3.53051000 | -3.35351300 | 0.28965600  |
| F | -3.40906800 | 3.22601800  | -1.56061500 | C            | -4.97541400 | -2.46766100 | -1.08945600 |
| C | -2.36050800 | 2.92023300  | -0.73458200 | H            | -5.68025600 | -3.29884200 | -1.00073900 |
| F | -2.26282600 | 0.82175900  | -1.77864400 | H            | -4.34274000 | -2.67787800 | -1.96150100 |
| C | -1.73495900 | 1.67957900  | -0.82110500 | C            | -5.70405600 | -1.13760500 | -1.28067600 |
| C | 1.68188100  | -0.14305200 | -0.06977700 | H            | -6.27944200 | -1.14958000 | -2.20958000 |
| F | 1.84832700  | 2.18237200  | -0.68802000 | H            | -6.41931000 | -0.99230600 | -0.46096200 |
| C | 2.44536300  | 0.96935100  | -0.42297700 | C            | -4.69622500 | 0.01055400  | -1.29341300 |
| F | 4.50773100  | 2.06952100  | -0.93651600 | H            | -4.05031600 | -0.06509200 | -2.17819900 |
| C | 3.82328600  | 0.93739200  | -0.58747700 | H            | -5.19784400 | 0.97973700  | -1.35695800 |
| F | 5.86569300  | -0.30112800 | -0.58253600 | C            | -3.82030900 | 0.01696400  | -0.04604900 |
| C | 4.51007700  | -0.25211000 | -0.41591900 | H            | -3.04808900 | 0.78137100  | -0.12481400 |
| F | 4.45321100  | -2.58728300 | 0.07264600  | H            | -4.40731800 | 0.18021300  | 0.86195700  |
| C | 3.80036500  | -1.39380900 | -0.08555300 | C            | 0.28933500  | 1.54103800  | -0.02601100 |
| F | 1.78137500  | -2.50780400 | 0.35485100  | F            | 2.11869000  | 1.29347300  | 1.46440500  |
| C | 2.42643000  | -1.31014500 | 0.07570800  | C            | 1.28294900  | 2.09291300  | 0.78090100  |
| H | -1.22946200 | -1.59863100 | -0.53434400 | F            | 2.46619000  | 3.90889500  | 1.73231700  |
| C | -0.40183600 | -1.16903900 | -1.37217800 | C            | 1.48623400  | 3.45612400  | 0.94895900  |
| H | -1.39111400 | -1.21036300 | -1.85949700 | F            | 0.82086500  | 5.66872100  | 0.45718800  |
| C | 1.30271600  | -0.93198900 | -3.23315700 | C            | 0.64994400  | 4.35626600  | 0.30473500  |
| H | 1.65832500  | -1.94875400 | -3.08945300 | F            | -1.20957300 | 4.71066100  | -1.10051800 |
| C | 0.33129200  | -0.41236100 | -2.48303100 | C            | -0.37529700 | 3.86687900  | -0.48703400 |
| H | 0.00076200  | 0.60961100  | -2.65081800 | F            | -1.59415200 | 2.11255400  | -1.37702000 |
| H | 1.78411600  | -0.35276000 | -4.01255000 | C            | -0.53175500 | 2.49218000  | -0.62079300 |

|               |             |             |             |              |             |             |             |
|---------------|-------------|-------------|-------------|--------------|-------------|-------------|-------------|
| C             | 1.38491000  | -0.97362600 | -0.04090600 | C            | 2.27578300  | -1.94327700 | 2.66096800  |
| F             | 2.66135800  | 0.70995100  | -1.12956200 | H            | 1.81283800  | -2.93774600 | 2.68441800  |
| C             | 2.57545300  | -0.52592800 | -0.61814600 | H            | 3.36281000  | -2.08928400 | 2.65334500  |
| F             | 4.82934800  | -0.78411100 | -1.28631600 | C            | 1.84369300  | -1.18322200 | 3.91750600  |
| C             | 3.72984000  | -1.28951900 | -0.72441300 | H            | 2.16395600  | -1.72776500 | 4.81131900  |
| F             | 4.83144100  | -3.34724600 | -0.35265800 | H            | 2.34491500  | -0.20618600 | 3.94367400  |
| C             | 3.73526200  | -2.59560300 | -0.25782600 | C            | 0.32905800  | -0.97339300 | 3.92219600  |
| F             | 2.54112800  | -4.36594700 | 0.74431800  | H            | 0.02730100  | -0.41270500 | 4.81294800  |
| C             | 2.57602100  | -3.10614300 | 0.29917000  | H            | -0.17053600 | -1.95010300 | 3.97503100  |
| F             | 0.35622800  | -2.90825400 | 0.90034300  | C            | -0.11997800 | -0.23464500 | 2.65966000  |
| C             | 1.44937800  | -2.29580800 | 0.37858800  | H            | 0.33471100  | 0.76461600  | 2.67019100  |
| H             | -2.56441300 | -1.41787300 | -0.74511900 | H            | -1.20384800 | -0.08346400 | 2.66565500  |
| C             | -0.67704200 | -0.54861500 | -1.55720400 | C            | 0.42467100  | 1.28659200  | -0.04331900 |
| H             | -1.66788700 | -0.09968400 | -1.71860300 | C            | -0.15050500 | 2.32933700  | 0.68541500  |
| C             | 0.92708500  | -1.01220700 | -3.43564300 | F            | -1.27029300 | 2.11904400  | 1.39376400  |
| H             | 0.95033500  | -2.07586000 | -3.20700300 | C            | 0.36803600  | 3.61466800  | 0.74606200  |
| C             | 0.16694200  | -0.17415700 | -2.73418400 | F            | -0.23948800 | 4.55840700  | 1.46252100  |
| H             | 0.18458500  | 0.88839800  | -2.97822300 | C            | 1.54078500  | 3.90981000  | 0.06568300  |
| H             | 1.56236100  | -0.66788100 | -4.24467300 | F            | 2.06276800  | 5.13142700  | 0.11694300  |
| H             | -0.78280200 | -1.64908100 | -1.54782700 | C            | 2.16784600  | 2.90758400  | -0.65507700 |
| <b>N12_TS</b> |             |             |             | F            | 3.30803400  | 3.15939200  | -1.29873600 |
| N             | 2.22540200  | -1.79839100 | 0.11423200  | C            | 1.60933600  | 1.63548700  | -0.68596900 |
| H             | 1.13111100  | -1.14242800 | -0.72413000 | F            | 2.31879700  | 0.72260000  | -1.38110400 |
| B             | -0.19682500 | -0.21906600 | 0.01791900  | C            | -1.80869200 | -0.38328800 | -0.19164100 |
| C             | 1.81608100  | -1.19101000 | 1.40760200  | C            | -2.69071600 | 0.63745200  | -0.55314600 |
| H             | 2.29167800  | -0.19810800 | 1.41799200  | F            | -2.23787800 | 1.84098400  | -0.93062200 |
| C             | 0.30174200  | -0.98183900 | 1.37961200  | C            | -4.07071600 | 0.48456200  | -0.62288100 |
| H             | -0.16517000 | -1.97004500 | 1.44247100  | F            | -4.84607000 | 1.50950100  | -0.97004500 |
| C             | 3.64189100  | -1.52202800 | -0.19498900 | C            | -4.63915100 | -0.74997900 | -0.35507600 |
| H             | 4.27964600  | -2.02201500 | 0.55240500  | F            | -5.95498600 | -0.91777900 | -0.42611100 |
| H             | 3.80114400  | -0.44634300 | -0.11077200 | C            | -3.80848300 | -1.81795300 | -0.05349100 |
| C             | 4.01900000  | -2.01572000 | -1.58569700 | F            | -4.32495500 | -3.02762700 | 0.15733100  |
| H             | 3.43016700  | -1.46919800 | -2.33290200 | C            | -2.43641700 | -1.61696100 | 0.00732600  |
| H             | 5.07021600  | -1.77775400 | -1.77416400 | F            | -1.71070200 | -2.73374700 | 0.21585800  |
| C             | 3.77258700  | -3.51911600 | -1.70003400 | C            | 0.27617800  | -1.07218700 | -1.73611000 |
| H             | 4.45164200  | -4.04349800 | -1.01438700 | H            | 1.19097500  | -1.47110500 | -2.19253100 |
| H             | 3.99689900  | -3.87776400 | -2.70870400 | H            | -0.42076000 | -1.91252400 | -1.68467300 |
| C             | 2.32726200  | -3.84568700 | -1.32477500 | C            | 0.54000200  | 0.39111000  | -3.74200700 |
| H             | 1.64779300  | -3.47434000 | -2.09841100 | H            | 1.50859300  | -0.04585200 | -3.97163400 |
| H             | 2.17628500  | -4.92843000 | -1.27305100 | C            | -0.17022100 | 0.00437400  | -2.68566100 |
| C             | 1.95801400  | -3.25311800 | 0.03671100  | H            | -1.12509100 | 0.48368000  | -2.49637500 |
| H             | 0.89731100  | -3.41714000 | 0.25098100  | H            | 0.17834700  | 1.16596100  | -4.40916800 |
| H             | 2.54380600  | -3.77152400 | 0.80984100  | <b>N12_P</b> |             |             |             |
|               |             |             |             | N            | 2.54757100  | -1.44563900 | 0.00548700  |

|   |             |             |             |               |             |             |             |
|---|-------------|-------------|-------------|---------------|-------------|-------------|-------------|
| H | 2.06873900  | -0.83624300 | -0.67011600 | C             | -2.01549500 | -0.28571800 | -0.27187000 |
| B | -0.36656900 | -0.43173100 | -0.30153300 | C             | -2.72472800 | 0.89383400  | -0.49145500 |
| C | 1.64237900  | -1.46999500 | 1.23797700  | F             | -2.08448500 | 2.06084800  | -0.66789100 |
| H | 1.83325200  | -0.49560200 | 1.70824700  | C             | -4.11097100 | 0.96717700  | -0.57486800 |
| C | 0.15353100  | -1.53452100 | 0.86148200  | F             | -4.71702700 | 2.13731500  | -0.78350100 |
| H | -0.04295200 | -2.54569100 | 0.47383000  | C             | -4.86733000 | -0.18819800 | -0.46407200 |
| C | 3.88499000  | -0.81977800 | 0.27593900  | F             | -6.19559200 | -0.14108900 | -0.55081700 |
| H | 4.38570800  | -1.45456800 | 1.01255000  | C             | -4.21624800 | -1.39661900 | -0.27382600 |
| H | 3.68644800  | 0.15503200  | 0.72886400  | F             | -4.92053900 | -2.52659700 | -0.17907000 |
| C | 4.71673700  | -0.68875600 | -0.99491300 | C             | -2.82982500 | -1.41507600 | -0.19639000 |
| H | 4.24868200  | 0.05076900  | -1.65115200 | F             | -2.28026300 | -2.63820000 | -0.03691200 |
| H | 5.69569300  | -0.29182400 | -0.71141800 | C             | -0.08847200 | -1.00774200 | -1.84124600 |
| C | 4.85504500  | -2.03013700 | -1.71396100 | H             | 0.94157000  | -1.30549700 | -2.08089000 |
| H | 5.44312100  | -2.72202400 | -1.09706100 | H             | -0.67395900 | -1.93848200 | -1.89420700 |
| H | 5.39631100  | -1.89879700 | -2.65416200 | C             | 0.20531500  | 0.40486500  | -3.91303300 |
| C | 3.47295500  | -2.62824200 | -1.97426700 | H             | 1.26010600  | 0.15405500  | -4.00029300 |
| H | 2.91340200  | -1.99204500 | -2.67127500 | C             | -0.54816700 | -0.08885700 | -2.93261100 |
| H | 3.54998400  | -3.61623200 | -2.43632200 | H             | -1.59781800 | 0.20360000  | -2.89309100 |
| C | 2.69349300  | -2.77422800 | -0.67367900 | H             | -0.19950700 | 1.08266700  | -4.65718800 |
| H | 1.68520300  | -3.16163000 | -0.83450200 |               |             |             |             |
| H | 3.22570500  | -3.43050800 | 0.01989200  | <b>N14_TS</b> |             |             |             |
| C | 2.07195600  | -2.57910200 | 2.20071000  | B             | 0.51700600  | -0.15240400 | 0.13740200  |
| H | 1.86301600  | -3.55601000 | 1.74739300  | N             | -2.19338300 | -0.73999500 | 0.83056600  |
| H | 3.14718100  | -2.53578700 | 2.41439100  | H             | -0.75977000 | -0.42616400 | 1.29176100  |
| C | 1.27403000  | -2.47509400 | 3.50242500  | C             | -1.95731000 | -0.46794400 | -0.62052500 |
| H | 1.56988700  | -3.28474800 | 4.17644500  | H             | -2.02814200 | 0.62370900  | -0.70384700 |
| H | 1.52236500  | -1.53166400 | 4.00625800  | C             | -0.51292200 | -0.86169900 | -0.90273400 |
| C | -0.22273900 | -2.51513500 | 3.20596300  | H             | -0.23575400 | -0.50512800 | -1.90230200 |
| H | -0.79312300 | -2.39842800 | 4.13314800  | H             | -0.39906400 | -1.94635800 | -0.92641100 |
| H | -0.48538300 | -3.49738600 | 2.79003400  | C             | -2.38846200 | -2.17790800 | 1.12503700  |
| C | -0.60413100 | -1.42629900 | 2.20353600  | H             | -1.52138200 | -2.72399700 | 0.73934100  |
| H | -0.40671700 | -0.44328400 | 2.64974500  | H             | -3.27945400 | -2.53698100 | 0.58968400  |
| H | -1.67833300 | -1.45900900 | 2.01704400  | C             | -2.55911900 | -2.44852300 | 2.62014400  |
| C | 0.38354000  | 1.02042000  | 0.02108500  | H             | -2.77216200 | -3.51422600 | 2.74868200  |
| C | -0.02190800 | 1.85300700  | 1.06914700  | H             | -1.62128400 | -2.25266000 | 3.15060800  |
| F | -1.11359300 | 1.54981100  | 1.78654900  | C             | -3.67972700 | -1.59702000 | 3.21513200  |
| C | 0.62463300  | 3.02456800  | 1.43853400  | H             | -4.64110700 | -1.91792700 | 2.79268600  |
| F | 0.16860300  | 3.76465400  | 2.44755900  | H             | -3.74026600 | -1.74291900 | 4.29747000  |
| C | 1.76334900  | 3.42902500  | 0.75296200  | C             | -3.45549100 | -0.12453500 | 2.87421900  |
| F | 2.40835400  | 4.53827300  | 1.10533700  | H             | -4.29110400 | 0.48874500  | 3.22489500  |
| C | 2.21846000  | 2.64688900  | -0.29293300 | H             | -2.55309500 | 0.25418300  | 3.37048900  |
| F | 3.33023700  | 2.97789600  | -0.95587800 | C             | -3.31213300 | 0.05622400  | 1.36829500  |
| C | 1.51625200  | 1.49390100  | -0.62878000 | H             | -3.12230700 | 1.10367100  | 1.12296700  |
| F | 2.08001100  | 0.78446000  | -1.64849100 | H             | -4.24600800 | -0.25196200 | 0.87037900  |

|              |             |             |             |   |             |             |             |
|--------------|-------------|-------------|-------------|---|-------------|-------------|-------------|
| C            | -3.00757100 | -1.05220500 | -1.54926100 | N | -2.71804800 | -0.64035300 | 0.77756500  |
| C            | -4.12143900 | -0.28290900 | -1.89885800 | H | -2.11691200 | -0.39549400 | 1.58720700  |
| H            | -4.20573300 | 0.73276600  | -1.51868500 | C | -1.80906200 | -0.51475000 | -0.46203000 |
| C            | -5.11103700 | -0.78986400 | -2.73644400 | H | -1.75442500 | 0.56491300  | -0.62315800 |
| H            | -5.96460300 | -0.17359500 | -2.99997400 | C | -0.41317300 | -1.06367300 | -0.17347200 |
| C            | -4.99754700 | -2.08096600 | -3.24295700 | H | 0.01384700  | -1.24284500 | -1.16602100 |
| H            | -5.76294900 | -2.47851800 | -3.90150700 | H | -0.49354500 | -2.06487100 | 0.26956800  |
| C            | -3.88979200 | -2.85616000 | -2.90951600 | C | -3.22778700 | -2.03315900 | 1.01177400  |
| H            | -3.78918600 | -3.86039200 | -3.30865100 | H | -2.35733100 | -2.69021100 | 1.05670300  |
| C            | -2.90321800 | -2.34473500 | -2.07219200 | H | -3.81656600 | -2.29572300 | 0.12970600  |
| H            | -2.04058800 | -2.95801400 | -1.82969800 | C | -4.07500900 | -2.13387300 | 2.27604100  |
| C            | 1.99599500  | -0.82100100 | 0.00984500  | H | -4.46390700 | -3.15501500 | 2.32831200  |
| C            | 3.19077100  | -0.12068800 | -0.15442400 | H | -3.44304900 | -1.98406400 | 3.15507300  |
| F            | 3.22156700  | 1.21542600  | -0.06347700 | C | -5.21120600 | -1.11282500 | 2.27979800  |
| C            | 4.42217600  | -0.73112500 | -0.36357100 | H | -5.92857900 | -1.34929800 | 1.48340400  |
| F            | 5.52150800  | 0.00290600  | -0.51863500 | H | -5.75490100 | -1.15664800 | 3.22699100  |
| C            | 4.50553900  | -2.11415500 | -0.39089700 | C | -4.64350700 | 0.28617700  | 2.04764500  |
| F            | 5.67404400  | -2.71648200 | -0.58459700 | H | -5.43806500 | 1.03563300  | 1.99678600  |
| C            | 3.35583400  | -2.86237500 | -0.18693600 | H | -3.98110800 | 0.57172000  | 2.87474100  |
| F            | 3.41798400  | -4.19303900 | -0.17360300 | C | -3.85778700 | 0.33406000  | 0.74595100  |
| C            | 2.14776500  | -2.20904200 | 0.01088500  | H | -3.42751400 | 1.31952500  | 0.56705000  |
| F            | 1.09208700  | -3.01126400 | 0.25983700  | H | -4.48332600 | 0.04898300  | -0.10550400 |
| C            | 0.38090800  | 1.45756000  | -0.04113500 | C | -2.49928100 | -1.11386200 | -1.67550800 |
| C            | -0.36929700 | 2.31944400  | 0.75224300  | C | -3.32662000 | -0.31649000 | -2.47103200 |
| F            | -1.03999800 | 1.86762700  | 1.83163300  | H | -3.45431600 | 0.73522900  | -2.22397300 |
| C            | -0.52724800 | 3.67493600  | 0.48424500  | C | -3.96443400 | -0.84267800 | -3.59186900 |
| F            | -1.25597000 | 4.44188800  | 1.29556700  | H | -4.59572500 | -0.20596300 | -4.20297800 |
| C            | 0.06099100  | 4.22005700  | -0.64484000 | C | -3.77643500 | -2.17768400 | -3.93390400 |
| F            | -0.08205600 | 5.51243500  | -0.92312900 | H | -4.26645000 | -2.59050900 | -4.80961000 |
| C            | 0.78438600  | 3.39490600  | -1.49560200 | C | -2.93729500 | -2.97766700 | -3.16065200 |
| F            | 1.33362500  | 3.89869600  | -2.59887600 | H | -2.76825400 | -4.01381400 | -3.43507600 |
| C            | 0.91091700  | 2.04905600  | -1.18778900 | C | -2.29860600 | -2.44819700 | -2.04476600 |
| F            | 1.58274300  | 1.29399700  | -2.07035200 | H | -1.61907800 | -3.06813100 | -1.46654200 |
| C            | 0.30311800  | -0.52964600 | 2.07351100  | C | 2.22778400  | -0.77872900 | 0.31469900  |
| H            | -0.53123700 | -0.49839700 | 2.78606000  | C | 3.36529900  | -0.05378800 | 0.67461400  |
| H            | 0.65123100  | -1.56532500 | 2.07046900  | F | 3.22932500  | 1.18784800  | 1.17556800  |
| C            | 1.10463700  | 1.17119500  | 3.71970600  | C | 4.66704600  | -0.51051500 | 0.54621400  |
| H            | 0.16016000  | 1.14373900  | 4.25708800  | F | 5.70098600  | 0.25437100  | 0.90239100  |
| C            | 1.31763600  | 0.42791000  | 2.63750900  | C | 4.89084100  | -1.78605800 | 0.04637900  |
| H            | 2.27455900  | 0.50362400  | 2.13025600  | F | 6.13198700  | -2.25310900 | -0.08595400 |
| H            | 1.86792100  | 1.84167700  | 4.09941500  | C | 3.80273200  | -2.56269700 | -0.30810200 |
| <b>N14_P</b> |             |             |             | F | 3.99088200  | -3.79900200 | -0.77801200 |
| B            | 0.72108100  | -0.16211400 | 0.64754400  | C | 2.51405600  | -2.05447400 | -0.15986300 |
|              |             |             |             | F | 1.53456000  | -2.91594600 | -0.51023600 |

|               |             |             |             |              |             |             |             |
|---------------|-------------|-------------|-------------|--------------|-------------|-------------|-------------|
| C             | 0.58346400  | 1.40662800  | 0.11469800  | H            | -4.00124000 | -4.14434300 | -2.65584100 |
| C             | -0.45545400 | 2.22896800  | 0.53433600  | C            | -3.05131600 | -2.51335100 | -1.63046800 |
| F             | -1.39726500 | 1.74573300  | 1.39434400  | H            | -2.11069800 | -3.04527700 | -1.52953000 |
| C             | -0.69101100 | 3.52716100  | 0.10468800  | C            | 1.95134100  | -0.76429600 | -0.04600100 |
| F             | -1.74615200 | 4.21215400  | 0.55709900  | C            | 3.08346500  | 0.02125600  | -0.26013600 |
| C             | 0.17089000  | 4.08999500  | -0.82151900 | F            | 3.01255900  | 1.35584900  | -0.22057100 |
| F             | -0.01828400 | 5.33297700  | -1.25863300 | C            | 4.34937000  | -0.50175300 | -0.49279500 |
| C             | 1.22029200  | 3.32101500  | -1.30007100 | F            | 5.38813000  | 0.30672200  | -0.69479100 |
| F             | 2.04558000  | 3.83375400  | -2.21196600 | C            | 4.53587700  | -1.87555200 | -0.49260800 |
| C             | 1.39478000  | 2.01787600  | -0.84432300 | F            | 5.74165300  | -2.39181600 | -0.70745000 |
| F             | 2.41135300  | 1.36004700  | -1.41512400 | C            | 3.45031500  | -2.70313900 | -0.25059100 |
| C             | 0.71224400  | -0.33572300 | 2.31592100  | F            | 3.61097100  | -4.02584900 | -0.21937200 |
| H             | 0.94785600  | -1.39600200 | 2.48230800  | C            | 2.20081400  | -2.13645300 | -0.03519400 |
| H             | 1.57775100  | 0.23443000  | 2.67625600  | F            | 1.21558100  | -3.01127100 | 0.25366400  |
| C             | -1.27294700 | -0.87213100 | 3.76149000  | C            | 0.25164300  | 1.42303800  | -0.00467000 |
| H             | -1.12995900 | -1.94337700 | 3.62473200  | C            | -0.38909100 | 2.31577500  | 0.84348100  |
| C             | -0.44096100 | 0.01061900  | 3.19280700  | F            | -0.82353700 | 1.92746300  | 2.06370100  |
| H             | -0.59954500 | 1.06495000  | 3.41177300  | C            | -0.65192700 | 3.64464400  | 0.52379400  |
| H             | -2.06581100 | -0.56097000 | 4.43663300  | F            | -1.27701900 | 4.43559600  | 1.39557800  |
| <b>N15_TS</b> |             |             |             | C            | -0.27385900 | 4.13238200  | -0.71489500 |
| N             | -2.19363000 | -0.67363800 | 1.14489700  | F            | -0.51555300 | 5.39658200  | -1.04737900 |
| B             | 0.46108200  | -0.17854600 | 0.20169000  | C            | 0.35806000  | 3.27942800  | -1.61115100 |
| C             | -2.07063300 | -0.53926700 | -0.34144000 | F            | 0.71897800  | 3.73006200  | -2.81016300 |
| H             | -2.16036300 | 0.53853100  | -0.52380800 | C            | 0.59120500  | 1.96308900  | -1.24621400 |
| C             | -0.64701200 | -0.95423000 | -0.69792700 | F            | 1.18874900  | 1.18534200  | -2.16060400 |
| H             | -0.45248800 | -0.69052700 | -1.74475900 | H            | -4.31911200 | -2.55102800 | 0.75501700  |
| H             | -0.52260800 | -2.03621600 | -0.63122400 | H            | -3.28286100 | -0.63885900 | 3.73582300  |
| C             | -2.35899000 | -2.07189100 | 1.61605700  | H            | -1.89549200 | -2.13940400 | 2.60781700  |
| C             | -3.78599500 | -2.61625800 | 1.70459400  | H            | -1.75642300 | -2.70507800 | 0.95854700  |
| H             | -4.37254300 | -2.09700600 | 2.46663000  | H            | -2.97863500 | 1.24041900  | 1.32107000  |
| H             | -3.73524300 | -3.66938700 | 1.99341700  | H            | -4.19298100 | -0.03807000 | 1.43618800  |
| C             | -3.08469100 | 0.32434000  | 3.25872600  | H            | -0.72687400 | -0.40287000 | 1.48167600  |
| H             | -3.82665400 | 1.03515800  | 3.63008100  | C            | 0.39953900  | -0.59744300 | 2.14478500  |
| H             | -2.10113500 | 0.67657700  | 3.57524400  | H            | 0.73112200  | -1.63452700 | 2.07432700  |
| C             | -3.17712200 | 0.24980800  | 1.73977300  | H            | -0.37827300 | -0.60032400 | 2.92811900  |
| C             | -3.18180400 | -1.21875400 | -1.12125700 | C            | 2.71640900  | -0.07401300 | 2.92965600  |
| C             | -4.39702200 | -0.55109900 | -1.30376300 | H            | 3.05231000  | -1.08885900 | 2.72782400  |
| H             | -4.50226700 | 0.47006600  | -0.94458400 | C            | 1.46895400  | 0.31188800  | 2.67835900  |
| C             | -5.46832800 | -1.17144300 | -1.93943800 | H            | 1.17003300  | 1.33261900  | 2.89530000  |
| H             | -6.40440200 | -0.63757100 | -2.06851300 | H            | 3.44581500  | 0.61609800  | 3.33954300  |
| C             | -5.33398900 | -2.47272400 | -2.41678500 | <b>N15_P</b> |             |             |             |
| H             | -6.16608000 | -2.96053700 | -2.91393600 | N            | -2.44897100 | -0.26966200 | 1.06755100  |
| C             | -4.11980100 | -3.13723600 | -2.26900300 | B            | 0.61263500  | -0.22682500 | 0.57799300  |

|   |             |             |             |               |             |             |             |
|---|-------------|-------------|-------------|---------------|-------------|-------------|-------------|
| C | -1.90804500 | -0.81420700 | -0.27778000 | C             | 0.35860600  | 1.59921500  | -1.33366800 |
| H | -1.88892200 | 0.08465300  | -0.90269500 | F             | 0.96435600  | 0.72820700  | -2.15116000 |
| C | -0.47915300 | -1.30278700 | -0.08688100 | H             | -4.48797000 | -2.24116500 | 1.06195400  |
| H | -0.14583500 | -1.58724000 | -1.09266200 | H             | -4.18274700 | 0.86787400  | 2.98230600  |
| H | -0.46733900 | -2.23089600 | 0.49324600  | H             | -2.56106300 | -0.90027100 | 3.06392000  |
| C | -2.77644100 | -1.33695100 | 2.08550200  | H             | -2.04970100 | -2.13458600 | 1.92269600  |
| C | -4.20446100 | -1.86282000 | 2.04427000  | H             | -3.18372500 | 1.43180500  | 0.12047100  |
| H | -4.93001300 | -1.10914600 | 2.35781100  | H             | -4.41142200 | 0.21672700  | 0.51435800  |
| H | -4.26825400 | -2.69124000 | 2.75378500  | H             | -1.63730100 | 0.22849600  | 1.45793400  |
| C | -3.83873600 | 1.51586700  | 2.17316900  | C             | 0.65802000  | -0.35679600 | 2.23598000  |
| H | -4.63383300 | 2.23441600  | 1.96307600  | H             | 0.94721000  | -1.39719900 | 2.44021000  |
| H | -2.96290100 | 2.07301100  | 2.50857600  | H             | -0.31118000 | -0.21494000 | 2.74207300  |
| C | -3.53673700 | 0.74685100  | 0.89652200  | C             | 2.88206000  | 0.21166400  | 3.25325900  |
| C | -2.88959700 | -1.79068900 | -0.89280800 | H             | 3.22993400  | -0.81447100 | 3.15396900  |
| C | -3.95233700 | -1.30646000 | -1.66166100 | C             | 1.65408800  | 0.56234400  | 2.87550700  |
| H | -4.03235900 | -0.23837100 | -1.85074300 | H             | 1.35414200  | 1.60483600  | 2.97756400  |
| C | -4.89820900 | -2.17272000 | -2.20201800 | H             | 3.58376900  | 0.93319500  | 3.65871700  |
| H | -5.71564500 | -1.77865600 | -2.79695900 |               |             |             |             |
| C | -4.78278600 | -3.54370400 | -1.99004300 | <b>N16_TS</b> |             |             |             |
| H | -5.51588100 | -4.22411000 | -2.41064300 | N             | -2.36146600 | -0.27788500 | 0.97478900  |
| C | -3.70773800 | -4.04089000 | -1.25760600 | H             | -0.94980400 | -0.42206400 | 1.40628200  |
| H | -3.59757400 | -5.11052700 | -1.11171700 | B             | 0.44233300  | -0.40218600 | 0.09678600  |
| C | -2.76356600 | -3.17186000 | -0.71829200 | C             | -2.08458700 | -0.40947900 | -0.49272700 |
| H | -1.92060300 | -3.57484800 | -0.16650300 | H             | -1.85836400 | 0.62022200  | -0.78786100 |
| C | 2.13260800  | -0.63288700 | 0.10517400  | C             | -0.74322200 | -1.16552800 | -0.77107700 |
| C | 3.14741700  | 0.28706500  | -0.14650800 | C             | -3.15475000 | -1.37287800 | 1.58927200  |
| F | 2.89833400  | 1.60603000  | -0.10705600 | H             | -2.66051900 | -2.32373800 | 1.39586600  |
| C | 4.46079400  | -0.06333600 | -0.43286500 | H             | -4.14544500 | -1.40116100 | 1.11428100  |
| F | 5.38030300  | 0.87483400  | -0.66926900 | C             | -3.34403500 | -1.17656000 | 3.09114900  |
| C | 4.82095300  | -1.40165400 | -0.45981400 | H             | -2.37183300 | -1.19518600 | 3.59422300  |
| F | 6.07612000  | -1.76130700 | -0.72675300 | H             | -3.91468800 | -2.02837200 | 3.47445700  |
| C | 3.85713400  | -2.36077300 | -0.19433000 | C             | -4.05380200 | 0.14172700  | 3.38054400  |
| F | 4.18458600  | -3.65556900 | -0.20044800 | H             | -5.07012300 | 0.10649200  | 2.96659700  |
| C | 2.55616900  | -1.95853800 | 0.08164100  | H             | -4.14828700 | 0.30743300  | 4.45756200  |
| F | 1.69335200  | -2.95761800 | 0.36646900  | C             | -3.27157200 | 1.27395300  | 2.72237500  |
| C | 0.18684800  | 1.27551800  | 0.01471900  | H             | -3.79075000 | 2.23125800  | 2.83049600  |
| C | -0.47850700 | 2.25706300  | 0.73399500  | H             | -2.29553100 | 1.38233500  | 3.20600300  |
| F | -0.78333800 | 2.05924000  | 2.04689700  | C             | -3.06666600 | 1.00369500  | 1.23637200  |
| C | -0.95007600 | 3.45584000  | 0.20558400  | H             | -4.04367700 | 0.96383300  | 0.72724000  |
| F | -1.61608000 | 4.32102000  | 0.97491900  | H             | -2.49092000 | 1.81051900  | 0.77926700  |
| C | -0.74320200 | 3.72323300  | -1.13636800 | C             | -3.29479000 | -0.78870500 | -1.34014600 |
| F | -1.18977200 | 4.85290000  | -1.67995100 | C             | -3.80867700 | 0.18218600  | -2.20778700 |
| C | -0.07750000 | 2.78178100  | -1.91399700 | H             | -3.33726100 | 1.16167700  | -2.24181000 |
| F | 0.11471600  | 3.02095200  | -3.21005600 | C             | -4.89783800 | -0.07819600 | -3.03431400 |



|   |             |             |             |              |             |             |             |
|---|-------------|-------------|-------------|--------------|-------------|-------------|-------------|
| H | -5.26824500 | 0.69618700  | -3.69834300 | H            | 0.24183100  | -3.84213900 | 3.64867300  |
| C | -5.50517700 | -1.32855700 | -3.00793300 |              |             |             |             |
| H | -6.35417700 | -1.54065900 | -3.64962700 | <b>N16_P</b> |             |             |             |
| C | -5.01376500 | -2.30718700 | -2.14889300 | N            | -2.44457000 | -0.00263000 | 0.79145400  |
| H | -5.47993400 | -3.28687800 | -2.11670500 | H            | -1.60972100 | 0.43648200  | 1.19539400  |
| C | -3.92306100 | -2.04220400 | -1.32597500 | B            | 0.58177200  | -0.41981800 | 0.42337400  |
| H | -3.57045800 | -2.82557100 | -0.66611700 | C            | -1.93856600 | -0.67794100 | -0.50051800 |
| C | 2.01439800  | -0.91369200 | 0.03237200  | H            | -1.74664400 | 0.20640300  | -1.11515000 |
| C | 2.98905000  | -0.20038100 | 0.75050800  | C            | -0.54462800 | -1.38300400 | -0.41250800 |
| F | 2.64685400  | 0.84834100  | 1.52297100  | C            | -2.99946700 | -0.87780100 | 1.87624800  |
| C | 4.34802700  | -0.47729600 | 0.74593300  | H            | -2.25100100 | -1.64021400 | 2.09415200  |
| F | 5.18881700  | 0.25333800  | 1.47440100  | H            | -3.90114100 | -1.34640100 | 1.47561600  |
| C | 4.82939900  | -1.51204900 | -0.03956300 | C            | -3.32571200 | -0.04873600 | 3.11459000  |
| F | 6.12601500  | -1.79492000 | -0.07024300 | H            | -2.40498700 | 0.39732200  | 3.51156700  |
| C | 3.92799500  | -2.23375000 | -0.79915500 | H            | -3.70552500 | -0.73057600 | 3.88096400  |
| F | 4.36050600  | -3.21883200 | -1.58351100 | C            | -4.34088300 | 1.04650400  | 2.79249900  |
| C | 2.57102700  | -1.92237800 | -0.75863400 | H            | -5.28817900 | 0.58651100  | 2.48266600  |
| F | 1.83411700  | -2.67601100 | -1.58864500 | H            | -4.54959200 | 1.64834400  | 3.68046000  |
| C | 0.49378600  | 1.21988200  | -0.14144700 | C            | -3.80500100 | 1.92817700  | 1.66698200  |
| C | 0.07275900  | 2.22502800  | 0.72320800  | H            | -4.55783900 | 2.65191100  | 1.34126700  |
| F | -0.45899600 | 1.92241100  | 1.92318600  | H            | -2.93621700 | 2.49928300  | 2.00716000  |
| C | 0.17327000  | 3.58419400  | 0.45230300  | C            | -3.41492700 | 1.09669700  | 0.45210600  |
| F | -0.27205200 | 4.48152800  | 1.33087700  | H            | -4.28251200 | 0.60362300  | 0.00304300  |
| C | 0.75480700  | 4.00155900  | -0.73393700 | H            | -2.93213700 | 1.71379100  | -0.31013700 |
| F | 0.86604400  | 5.29593500  | -1.01315200 | C            | -3.07844000 | -1.42247600 | -1.17383400 |
| C | 1.22893100  | 3.04554500  | -1.61941300 | C            | -3.59991700 | -0.89641600 | -2.36125000 |
| F | 1.81320600  | 3.42194100  | -2.75434300 | H            | -3.17439000 | 0.01866800  | -2.76655100 |
| C | 1.10218000  | 1.69856900  | -1.30451900 | C            | -4.64009900 | -1.52726200 | -3.03726700 |
| F | 1.63640800  | 0.84483800  | -2.18982500 | H            | -5.02178200 | -1.10024200 | -3.95883800 |
| C | -0.52387800 | -0.99530500 | -2.29106000 | C            | -5.18500000 | -2.70293500 | -2.53074100 |
| H | -1.28273500 | -1.56690400 | -2.83648400 | H            | -5.99673700 | -3.19906600 | -3.05241600 |
| H | -0.62565000 | 0.05067800  | -2.59894100 | C            | -4.67505400 | -3.24374900 | -1.35420400 |
| H | 0.45525500  | -1.34484500 | -2.61037400 | H            | -5.08470500 | -4.16666900 | -0.95685400 |
| C | -0.84381900 | -2.67429500 | -0.47471700 | C            | -3.62943900 | -2.61461700 | -0.68470200 |
| H | 0.10045800  | -3.17563400 | -0.67162100 | H            | -3.23640600 | -3.06885400 | 0.21700700  |
| H | -1.09903900 | -2.89553600 | 0.56166100  | C            | 2.20649200  | -0.76630900 | 0.18836200  |
| H | -1.58507300 | -3.14495600 | -1.12724200 | C            | 3.12657200  | 0.18920700  | 0.64477400  |
| C | 0.14419300  | -0.71869400 | 2.07911700  | F            | 2.70206900  | 1.33610200  | 1.21105600  |
| H | -0.49579300 | -0.30354500 | 2.87289700  | C            | 4.50729200  | 0.06944800  | 0.57437800  |
| H | 1.02484800  | -0.09358100 | 2.19616000  | F            | 5.29571500  | 1.04393000  | 1.02985900  |
| C | -0.00174400 | -2.79879100 | 3.47882400  | C            | 5.06604200  | -1.07494100 | 0.02885100  |
| H | -0.58332900 | -2.30069700 | 4.25025200  | F            | 6.38685700  | -1.21766000 | -0.05424800 |
| C | 0.41902600  | -2.15785200 | 2.38947100  | C            | 4.21544700  | -2.06664200 | -0.42232300 |
| H | 1.02477100  | -2.70553100 | 1.66941400  | F            | 4.71880300  | -3.18639500 | -0.94457500 |

|               |             |             |             |   |             |             |             |
|---------------|-------------|-------------|-------------|---|-------------|-------------|-------------|
| C             | 2.83575800  | -1.89848400 | -0.32759700 | C | -4.10474300 | -3.22420800 | -0.49146500 |
| F             | 2.14100000  | -2.95623300 | -0.79199200 | H | -4.22552200 | -4.22254200 | -0.91698300 |
| C             | 0.41342500  | 1.16363500  | -0.13486000 | H | -4.60849600 | -3.20062900 | 0.48149500  |
| C             | -0.19098400 | 2.21597300  | 0.54634200  | C | -2.63946000 | -2.82973000 | -0.33107600 |
| F             | -0.71947400 | 2.02265400  | 1.78959700  | H | -2.06073600 | -3.14278900 | -1.20629500 |
| C             | -0.35237500 | 3.50849000  | 0.06256600  | H | -2.16249800 | -3.25087600 | 0.55419600  |
| F             | -0.99665500 | 4.42536800  | 0.78897800  | C | -3.10251100 | -1.29453300 | 2.20653100  |
| C             | 0.16227900  | 3.82905000  | -1.18185400 | H | -2.97826500 | -2.38346500 | 2.26677300  |
| F             | 0.02795100  | 5.05576300  | -1.67856300 | H | -4.17121100 | -1.10097900 | 2.05372700  |
| C             | 0.81869600  | 2.84034800  | -1.90062400 | C | -2.63169000 | -0.68063800 | 3.52762900  |
| F             | 1.33835600  | 3.13039600  | -3.09164100 | H | -2.82038300 | 0.40140000  | 3.51409800  |
| C             | 0.93604100  | 1.55972800  | -1.37074000 | H | -3.21503000 | -1.09289500 | 4.35694500  |
| F             | 1.62049700  | 0.69552500  | -2.13305900 | C | -1.13714700 | -0.92666000 | 3.73587000  |
| C             | -0.19614900 | -1.52966000 | -1.91513100 | H | -0.95036400 | -2.00701700 | 3.80275200  |
| H             | -0.88262600 | -2.23155400 | -2.40424600 | H | -0.80811600 | -0.48682000 | 4.68298400  |
| H             | -0.26537900 | -0.57730900 | -2.44900800 | C | -0.33228500 | -0.34340700 | 2.57500400  |
| H             | 0.81362700  | -1.90718600 | -2.05047000 | H | 0.73769700  | -0.52074500 | 2.72034300  |
| C             | -0.63413400 | -2.80783500 | 0.16794100  | H | -0.47127700 | 0.74668900  | 2.56836800  |
| H             | 0.36350300  | -3.22005200 | 0.30402900  | C | -0.06531800 | 1.36253300  | -0.01382500 |
| H             | -1.11167300 | -2.86196900 | 1.14752300  | C | 0.83595300  | 2.17604300  | 0.67355100  |
| H             | -1.16611800 | -3.47948100 | -0.51559900 | F | 1.85966100  | 1.62875800  | 1.34459900  |
| C             | 0.43615800  | -0.49052000 | 2.09041500  | C | 0.73839000  | 3.55942100  | 0.72926200  |
| H             | -0.53111100 | -0.20746400 | 2.52393200  | F | 1.63225500  | 4.27704500  | 1.40615900  |
| H             | 1.12915300  | 0.26843600  | 2.47707200  | C | -0.31004300 | 4.19771600  | 0.08021400  |
| C             | 0.11580700  | -2.40476600 | 3.69267800  | F | -0.42560800 | 5.52078100  | 0.12910200  |
| H             | -0.78614600 | -1.95742200 | 4.11047200  | C | -1.24211200 | 3.43553100  | -0.60443400 |
| C             | 0.80112200  | -1.80160900 | 2.72125600  | F | -2.26871400 | 4.02218500  | -1.21894000 |
| H             | 1.70880100  | -2.28199600 | 2.35192500  | C | -1.10092500 | 2.05350000  | -0.62762800 |
| H             | 0.43240800  | -3.35119000 | 4.11823100  | F | -2.06285100 | 1.38022600  | -1.29100700 |
| <b>N17_TS</b> |             |             |             | C | 1.62416400  | -0.76245300 | -0.11267200 |
| B             | 0.08946500  | -0.25427500 | 0.02689500  | C | 2.18884400  | -1.83015100 | 0.58596400  |
| N             | -2.62989800 | -1.33835700 | -0.28556800 | F | 1.48012000  | -2.55752000 | 1.46454300  |
| H             | -1.44938000 | -0.96571100 | -0.97482900 | C | 3.51727900  | -2.22407800 | 0.45415400  |
| C             | -2.28707500 | -0.74580100 | 1.03162600  | F | 3.98520600  | -3.25314000 | 1.15853500  |
| H             | -2.51038800 | 0.32669700  | 0.93280700  | C | 4.35454600  | -1.54225600 | -0.41156000 |
| C             | -0.77719600 | -0.92027200 | 1.21685900  | F | 5.62373500  | -1.90748400 | -0.55226900 |
| H             | -0.58849600 | -1.99923100 | 1.25067200  | C | 3.84794400  | -0.47087300 | -1.13322000 |
| C             | -3.92868700 | -0.86542000 | -0.84688700 | F | 4.63528000  | 0.19724800  | -1.97309800 |
| H             | -4.51688200 | -0.40716700 | -0.04346800 | C | 2.52041700  | -0.11056400 | -0.96598500 |
| H             | -3.74874100 | -0.10769700 | -1.60935900 | F | 2.10731500  | 0.93500400  | -1.70167600 |
| C             | -4.63313900 | -2.10803600 | -1.39320900 | C | -0.45981300 | -0.93104100 | -1.89454500 |
| H             | -4.32028600 | -2.28683000 | -2.42617700 | H | 0.04936200  | -1.89845600 | -1.90108800 |
| H             | -5.71981800 | -2.00465700 | -1.37189100 | H | 0.26481500  | -0.15251900 | -2.13282500 |
|               |             |             |             | C | -1.87310900 | -1.93983400 | -3.71687400 |

|              |             |             |             |               |             |             |             |
|--------------|-------------|-------------|-------------|---------------|-------------|-------------|-------------|
| H            | -1.45141900 | -2.92917800 | -3.55394200 | C             | -1.58141900 | 3.31666800  | -0.16628100 |
| C            | -1.48449500 | -0.88674700 | -2.99851500 | F             | -2.77426700 | 3.81847400  | -0.49539900 |
| H            | -1.91570900 | 0.08901600  | -3.21043900 | C             | -1.29460300 | 1.97439100  | -0.37890500 |
| H            | -2.60121400 | -1.83989900 | -4.51547800 | F             | -2.33667000 | 1.26095400  | -0.89207700 |
| <b>N17_P</b> |             |             |             | C             | 1.75859300  | -0.70274900 | -0.22379300 |
| B            | 0.14454200  | -0.28799500 | -0.33676000 | C             | 2.32059500  | -1.81146500 | 0.40232100  |
| N            | -2.82174900 | -1.39640400 | -0.40589400 | F             | 1.58339000  | -2.66560900 | 1.14579200  |
| H            | -2.26355600 | -0.91605700 | -1.12392300 | C             | 3.67190100  | -2.14954300 | 0.33521800  |
| C            | -2.22443700 | -0.97048600 | 0.92661600  | F             | 4.12623100  | -3.23268300 | 0.97041000  |
| H            | -2.52119400 | 0.08040400  | 1.02534300  | C             | 4.54117100  | -1.36735800 | -0.40116300 |
| C            | -0.69638400 | -1.07932000 | 0.87453700  | F             | 5.83394800  | -1.67680600 | -0.48470700 |
| H            | -0.47073300 | -2.15179300 | 0.80153600  | C             | 4.03862100  | -0.25390700 | -1.06068400 |
| C            | -4.25052300 | -0.95573400 | -0.62929100 | F             | 4.85578800  | 0.51481500  | -1.78242900 |
| H            | -4.68338900 | -0.72388200 | 0.34505100  | C             | 2.68839200  | 0.03493400  | -0.96316600 |
| H            | -4.22934000 | -0.05105000 | -1.23543200 | F             | 2.27459000  | 1.11657000  | -1.64888100 |
| C            | -4.93763300 | -2.14954500 | -1.28539400 | C             | -0.15410200 | -0.75587400 | -1.94238500 |
| H            | -4.77665900 | -2.12484100 | -2.36785200 | H             | -0.20026500 | -1.85668900 | -1.97927700 |
| H            | -6.01222200 | -2.15224200 | -1.09618800 | H             | 0.77469700  | -0.49272500 | -2.46109400 |
| C            | -4.20482000 | -3.34452300 | -0.67121200 | C             | -2.13177900 | -0.86297100 | -3.53086000 |
| H            | -4.33989900 | -4.27128900 | -1.23108900 | H             | -2.14459600 | -1.95143300 | -3.54610200 |
| H            | -4.53741300 | -3.51361800 | 0.35829900  | C             | -1.21998000 | -0.18242700 | -2.82560100 |
| C            | -2.75421200 | -2.87937100 | -0.69369000 | H             | -1.21566900 | 0.90265400  | -2.92218600 |
| H            | -2.32273600 | -2.99006900 | -1.68907300 | H             | -2.84293900 | -0.36084200 | -4.17929000 |
| H            | -2.09498900 | -3.36143400 | 0.02490300  | <b>N18_TS</b> |             |             |             |
| C            | -2.85305600 | -1.76797300 | 2.07308900  | C             | -2.83621300 | -0.85976100 | 1.85252200  |
| H            | -2.61779900 | -2.83379900 | 1.95929700  | C             | -2.08231800 | -0.50157000 | 0.50340200  |
| H            | -3.94596700 | -1.67476200 | 2.07300000  | H             | -2.15291100 | 0.58832700  | 0.41388900  |
| C            | -2.29108700 | -1.29776000 | 3.41713700  | C             | -0.62257400 | -0.87499900 | 0.76882300  |
| H            | -2.58598700 | -0.25367000 | 3.58647400  | H             | -0.51057500 | -1.92371900 | 0.51162400  |
| H            | -2.73471200 | -1.88907700 | 4.22397800  | C             | -0.60482000 | -0.86875700 | 2.31515200  |
| C            | -0.76739100 | -1.39875700 | 3.42154700  | H             | 0.34312500  | -1.20818100 | 2.74419200  |
| H            | -0.46517100 | -2.45100300 | 3.33361300  | C             | -1.09770000 | 0.49207900  | 2.87427700  |
| H            | -0.36939900 | -1.02994100 | 4.37241800  | H             | -0.64797400 | 1.33625800  | 2.35524100  |
| C            | -0.18409700 | -0.60693200 | 2.25369800  | H             | -0.84057200 | 0.60164800  | 3.93030800  |
| H            | 0.90701200  | -0.64692600 | 2.27285200  | C             | -2.63950400 | 0.44606800  | 2.65812200  |
| H            | -0.45069100 | 0.45242600  | 2.38151900  | H             | -3.01709900 | 1.31795200  | 2.11402700  |
| C            | -0.09118900 | 1.34329200  | -0.08290800 | H             | -3.18715700 | 0.39733700  | 3.60375300  |
| C            | 0.82073200  | 2.20081500  | 0.53945400  | C             | -1.83069100 | -1.78787400 | 2.62000000  |
| F            | 2.00033600  | 1.74991300  | 0.98708200  | C             | -4.28116600 | -1.31677900 | 1.77408700  |
| C            | 0.59307100  | 3.55221300  | 0.77333800  | H             | -4.40099200 | -2.23428600 | 1.18937200  |
| F            | 1.52364300  | 4.30196800  | 1.36242100  | H             | -4.91970100 | -0.54494600 | 1.33232000  |
| C            | -0.61710300 | 4.12380400  | 0.41140300  | H             | -4.66659700 | -1.51492000 | 2.77993700  |
| F            | -0.85392500 | 5.41462000  | 0.63335800  | C             | -1.74720800 | -3.23005500 | 2.10564800  |

|   |             |             |             |               |             |             |             |
|---|-------------|-------------|-------------|---------------|-------------|-------------|-------------|
| H | -1.82165300 | -3.33553600 | 1.02665800  | C             | -0.71008200 | 3.70504900  | -0.56554300 |
| H | -2.56103200 | -3.82190300 | 2.53831700  | F             | -1.46353900 | 1.80625500  | -1.65156700 |
| H | -0.80389400 | -3.68981300 | 2.42087800  | C             | -0.59947900 | 2.33278500  | -0.75897500 |
| C | -2.10684100 | -1.91898000 | 4.12792200  | C             | -0.01271800 | -0.49972600 | -2.18501200 |
| H | -3.11142300 | -2.31811100 | 4.30708600  | H             | -0.86176800 | -0.56993300 | -2.88107000 |
| H | -2.01094800 | -0.98926900 | 4.68773500  | C             | 0.50874700  | 1.28491600  | -3.86016700 |
| H | -1.39701900 | -2.63275200 | 4.55848100  | H             | -0.47128400 | 1.18911200  | -4.32146000 |
| N | -2.43502200 | -0.91623600 | -0.87670800 | C             | 0.86950800  | 0.53861000  | -2.81895700 |
| H | -1.11743800 | -0.49663000 | -1.40508900 | H             | 1.85566900  | 0.69039500  | -2.39135300 |
| C | -2.52779800 | -2.36332300 | -1.16969100 | H             | 1.18047100  | 2.02548700  | -4.28048500 |
| H | -3.34383200 | -2.80656000 | -0.58167700 | H             | 0.43848000  | -1.49607800 | -2.19065600 |
| H | -1.59110900 | -2.83574300 | -0.86714100 |               |             |             |             |
| C | -2.76185300 | -2.64608900 | -2.65626400 | <b>N19_TS</b> |             |             |             |
| H | -2.90095500 | -3.72531500 | -2.77258100 | B             | -0.55081200 | -0.45854700 | -0.02227800 |
| H | -1.86455500 | -2.38479400 | -3.22736400 | C             | 0.02355000  | -1.37641900 | -1.22093200 |
| C | -3.96108000 | -1.87868800 | -3.20694800 | C             | -0.75040700 | -2.44582400 | -1.69046500 |
| H | -4.88171700 | -2.25191400 | -2.73870700 | H             | -1.68911800 | -2.67510600 | -1.19687500 |
| H | -4.05934300 | -2.04234300 | -4.28384700 | C             | -0.38000700 | -3.22954500 | -2.78186600 |
| C | -3.80824900 | -0.39368200 | -2.88723300 | H             | -1.01856300 | -4.04690700 | -3.10159300 |
| H | -2.94665700 | 0.02950100  | -3.41894700 | C             | 0.78454300  | -2.93395800 | -3.47453500 |
| H | -4.68881800 | 0.17068900  | -3.20860300 | H             | 1.06773100  | -3.49960400 | -4.35621700 |
| C | -3.62367500 | -0.19857200 | -1.38795000 | C             | 1.59706100  | -1.90492700 | -3.00866500 |
| H | -3.50194700 | 0.85821800  | -1.14542100 | H             | 2.52108400  | -1.67700100 | -3.53473300 |
| H | -4.51754500 | -0.57036800 | -0.86532800 | C             | 1.26165500  | -1.16875700 | -1.87149900 |
| B | 0.40077900  | -0.08731500 | -0.20053300 | C             | 2.27192900  | -0.15651400 | -1.39064400 |
| C | 1.89588600  | -0.74803700 | -0.24688000 | H             | 1.80937200  | 0.82740300  | -1.34717500 |
| F | 1.05537500  | -2.99174300 | -0.24097100 | H             | 3.08679300  | -0.09447500 | -2.11482400 |
| C | 2.09394500  | -2.13279900 | -0.19162900 | N             | 2.84795900  | -0.40888700 | -0.02406000 |
| F | 3.42997000  | -4.07637500 | -0.08726000 | C             | 3.70789500  | -1.69132400 | 0.03434400  |
| C | 3.33745300  | -2.74867100 | -0.14614500 | C             | 4.51776800  | -1.73809000 | 1.34232600  |
| F | 5.68556200  | -2.54101200 | -0.13926500 | H             | 3.81912800  | -1.88462700 | 2.17357600  |
| C | 4.48545800  | -1.97341400 | -0.17687200 | H             | 5.14871900  | -2.63127000 | 1.29189300  |
| F | 5.44376100  | 0.16572000  | -0.36281300 | C             | 5.33166900  | -0.49198800 | 1.62722900  |
| C | 4.35693900  | -0.59879800 | -0.28432800 | H             | 6.07877700  | -0.30974400 | 0.84506700  |
| F | 3.08880400  | 1.29932300  | -0.52844400 | H             | 5.88186700  | -0.60921100 | 2.56555900  |
| C | 3.09110700  | -0.02702100 | -0.33088500 | C             | 4.34488600  | 0.65437100  | 1.73944700  |
| C | 0.29689900  | 1.52459500  | -0.06919800 | H             | 4.84753500  | 1.59719200  | 1.97856000  |
| F | 1.85194800  | 1.48966700  | 1.70797300  | H             | 3.64829400  | 0.43928000  | 2.55773200  |
| C | 1.04423900  | 2.19289300  | 0.89953200  | C             | 3.53869300  | 0.89253400  | 0.45409100  |
| F | 1.71790700  | 4.13312600  | 2.07081000  | C             | 2.47272400  | 1.93991100  | 0.80252900  |
| C | 0.97263600  | 3.55789200  | 1.12893200  | H             | 1.73684800  | 1.54119200  | 1.49875000  |
| F | -0.00888900 | 5.63450900  | 0.58914600  | H             | 1.95122400  | 2.34221500  | -0.06854100 |
| C | 0.08836500  | 4.32494300  | 0.38074500  | H             | 2.97540900  | 2.77844000  | 1.29273900  |
| F | -1.59014900 | 4.41886200  | -1.26798500 | C             | 4.46134300  | 1.52596900  | -0.60268000 |

|   |             |             |             |   |             |             |             |
|---|-------------|-------------|-------------|---|-------------|-------------|-------------|
| H | 3.93412500  | 1.77953600  | -1.52391600 | B | -0.60649400 | -0.64338800 | 0.29948500  |
| H | 5.33120100  | 0.91937300  | -0.85273800 | C | 0.06209300  | -1.71325000 | -0.76302700 |
| H | 4.83574000  | 2.46442000  | -0.18409300 | C | -0.63025800 | -2.90457100 | -1.03489400 |
| C | 4.65319500  | -1.81387100 | -1.17143100 | H | -1.60069000 | -3.05422200 | -0.57007200 |
| H | 4.10352200  | -2.03602200 | -2.08759400 | C | -0.15520100 | -3.89854600 | -1.88381700 |
| H | 5.32615000  | -2.65591700 | -0.98938700 | H | -0.74665400 | -4.79326400 | -2.05413100 |
| H | 5.26975800  | -0.93213700 | -1.34186000 | C | 1.05318400  | -3.71960100 | -2.54584900 |
| C | 2.84207900  | -2.96458100 | 0.06652300  | H | 1.41762500  | -4.45039300 | -3.26013000 |
| H | 2.26012600  | -3.02142400 | 0.98598600  | C | 1.78671800  | -2.57348900 | -2.27566400 |
| H | 3.53193200  | -3.81424100 | 0.06929700  | H | 2.72059300  | -2.41402800 | -2.80950400 |
| H | 2.17845800  | -3.08091800 | -0.78729200 | C | 1.34818500  | -1.61368800 | -1.35274400 |
| C | -2.14430500 | -0.81456700 | 0.27845100  | C | 2.28232600  | -0.43635700 | -1.15718400 |
| C | -2.74111600 | -1.42368900 | 1.37846600  | H | 1.72881700  | 0.49411900  | -1.19809800 |
| F | -2.00816000 | -1.85868500 | 2.41804600  | H | 3.02201800  | -0.42467300 | -1.95719100 |
| C | -4.11292300 | -1.63135600 | 1.49435300  | N | 3.10236400  | -0.31956500 | 0.14277700  |
| F | -4.61466400 | -2.21749000 | 2.58017800  | C | 4.11786400  | -1.48112700 | 0.38358400  |
| C | -4.95664500 | -1.22826400 | 0.47377500  | C | 5.03871400  | -1.14112000 | 1.56918300  |
| F | -6.26882400 | -1.41974600 | 0.56800400  | H | 4.46233200  | -1.20766900 | 2.49993500  |
| C | -4.41321500 | -0.62528800 | -0.65278100 | H | 5.78617700  | -1.93917400 | 1.61542600  |
| F | -5.20814200 | -0.23933900 | -1.64912800 | C | 5.68616700  | 0.22858900  | 1.49732900  |
| C | -3.04177700 | -0.43600700 | -0.72362700 | H | 6.32396300  | 0.32084800  | 0.61070400  |
| F | -2.57557300 | 0.12812900  | -1.84696300 | H | 6.33216000  | 0.38241600  | 2.36596100  |
| C | -0.52532200 | 1.16301500  | -0.15625200 | C | 4.57100600  | 1.25851700  | 1.48735400  |
| C | -0.39414500 | 1.86852200  | -1.35024600 | H | 4.96731300  | 2.27859700  | 1.48435500  |
| F | -0.17004100 | 1.23349100  | -2.50611100 | H | 3.97270500  | 1.15587600  | 2.40200300  |
| C | -0.45167700 | 3.25669000  | -1.42937200 | C | 3.63622100  | 1.15338100  | 0.27606100  |
| F | -0.29896200 | 3.87476400  | -2.59924900 | C | 2.44029500  | 2.07318900  | 0.54937000  |
| C | -0.68721000 | 4.00027300  | -0.28265800 | H | 1.79644700  | 1.67348000  | 1.33914400  |
| F | -0.75079300 | 5.32620000  | -0.34104200 | H | 1.83718200  | 2.27985500  | -0.33582800 |
| C | -0.87102200 | 3.34217400  | 0.92548700  | H | 2.83973000  | 3.02872700  | 0.90024800  |
| F | -1.11909600 | 4.03755700  | 2.03373900  | C | 4.34977500  | 1.62563500  | -0.99252800 |
| C | -0.80929800 | 1.95697800  | 0.95227200  | H | 3.70454000  | 1.59918900  | -1.87141800 |
| F | -1.02288500 | 1.37589900  | 2.14707400  | H | 5.27115500  | 1.08531200  | -1.21009800 |
| H | 1.73343800  | -0.61113900 | 0.66668400  | H | 4.61972800  | 2.67227300  | -0.82812300 |
| C | 0.59232500  | -1.00618200 | 1.47182500  | C | 4.94849100  | -1.74730400 | -0.87230000 |
| H | 0.59462800  | -2.09570100 | 1.41158200  | H | 4.34284100  | -2.16887800 | -1.67271400 |
| H | -0.47035700 | -0.77052500 | 1.64394500  | H | 5.70393300  | -2.49344300 | -0.61372100 |
| C | 1.10847300  | -0.56032100 | 2.80634900  | H | 5.47146600  | -0.86752300 | -1.24735200 |
| H | 0.93901900  | 0.48042700  | 3.07508100  | C | 3.36523600  | -2.75843300 | 0.77840700  |
| C | 1.72917200  | -1.35161500 | 3.68402700  | H | 2.82769000  | -2.62643600 | 1.72078300  |
| H | 1.87603500  | -2.41195700 | 3.49177800  | H | 4.12022600  | -3.53335600 | 0.94146900  |
| H | 2.08438200  | -0.96770800 | 4.63444600  | H | 2.67113700  | -3.11276900 | 0.01912700  |
|   |             |             |             | C | -2.24787600 | -0.84499000 | 0.40452900  |
|   |             |             |             | C | -2.98916500 | -0.90649500 | 1.57968400  |

N19\_P

|               |             |             |             |   |             |             |             |
|---------------|-------------|-------------|-------------|---|-------------|-------------|-------------|
| F             | -2.39098900 | -0.88410600 | 2.78408100  | H | 1.09043100  | 1.95832600  | 0.14223500  |
| C             | -4.37887700 | -0.98631400 | 1.61586200  | N | 2.60022400  | 0.66608300  | -0.61619400 |
| F             | -5.02460500 | -1.04927100 | 2.78228700  | C | 2.96863200  | 1.66503100  | -1.71328400 |
| C             | -5.09459700 | -0.99380700 | 0.43086000  | C | 3.85265200  | 2.76124200  | -1.11574100 |
| F             | -6.42448900 | -1.07305000 | 0.44369600  | H | 4.14135100  | 3.44564400  | -1.91973700 |
| C             | -4.40767500 | -0.91265100 | -0.77280000 | H | 3.25473800  | 3.35507200  | -0.41700200 |
| F             | -5.08382400 | -0.90608600 | -1.92334400 | C | 5.09728600  | 2.19761000  | -0.43542400 |
| C             | -3.02310500 | -0.82935000 | -0.75694400 | C | 4.96338800  | 0.77695800  | 0.07523400  |
| F             | -2.42240800 | -0.71612000 | -1.95226100 | C | 6.09931700  | 0.21483700  | 0.65929200  |
| C             | -0.56140200 | 0.94376200  | -0.21168700 | C | 6.10361700  | -1.10576400 | 1.06980300  |
| C             | -0.38942100 | 1.36984200  | -1.53095800 | H | 6.98695300  | -1.53833400 | 1.52806300  |
| F             | -0.07064400 | 0.50591000  | -2.50964300 | C | 4.96686600  | -1.87879100 | 0.87401300  |
| C             | -0.47616700 | 2.69767900  | -1.94305900 | H | 4.97750700  | -2.91633900 | 1.18590600  |
| F             | -0.26555700 | 3.02752100  | -3.21880000 | C | 3.80562300  | -1.36165900 | 0.29594300  |
| C             | -0.80086300 | 3.68110100  | -1.02320600 | C | 3.80920100  | -0.00418500 | -0.09169600 |
| F             | -0.89744500 | 4.95516600  | -1.39661000 | C | 2.62316500  | -2.29026400 | 0.07944200  |
| C             | -1.04935900 | 3.30959800  | 0.28997200  | H | 1.72268100  | -1.73699200 | 0.33649300  |
| F             | -1.40514700 | 4.23223600  | 1.18447700  | C | 2.60853500  | -3.51223800 | 1.00121700  |
| C             | -0.95348900 | 1.97143700  | 0.64769200  | H | 1.63764400  | -4.00535700 | 0.91110400  |
| F             | -1.30146700 | 1.69443400  | 1.91378100  | H | 2.74484800  | -3.22003100 | 2.04636800  |
| H             | 2.41882000  | -0.39648700 | 0.90994300  | H | 3.37817200  | -4.24324600 | 0.73168600  |
| C             | 0.15920900  | -1.09177500 | 1.73055200  | C | 2.55419600  | -2.73441100 | -1.38636000 |
| H             | 1.10981700  | -1.57103400 | 1.46876600  | H | 1.71215800  | -3.41748600 | -1.53243000 |
| H             | -0.44923300 | -1.93620800 | 2.08038700  | H | 3.47438800  | -3.25969000 | -1.66249700 |
| C             | 0.42164300  | -0.20627500 | 2.90562000  | H | 2.42594500  | -1.89020200 | -2.07150700 |
| H             | -0.42768700 | 0.30973600  | 3.33823400  | C | 1.73792900  | 2.32597600  | -2.34214100 |
| C             | 1.62093300  | -0.04050500 | 3.47209200  | H | 1.12026200  | 2.87677500  | -1.62976300 |
| H             | 2.49337200  | -0.59282800 | 3.12065400  | H | 1.10878900  | 1.61410000  | -2.87632100 |
| H             | 1.77394500  | 0.59763700  | 4.33646500  | H | 2.10133600  | 3.05472400  | -3.07213800 |
| <b>N20_TS</b> |             |             |             | C | 3.68354200  | 0.88514700  | -2.82149000 |
| B             | -1.02737300 | -0.03423100 | 0.17494400  | H | 3.01878000  | 0.11140300  | -3.21974000 |
| C             | 0.00734800  | -0.26661400 | 1.41516100  | H | 4.60413500  | 0.40771100  | -2.48199800 |
| C             | -0.37720000 | -1.14575700 | 2.43853800  | H | 3.92945600  | 1.56971600  | -3.63793500 |
| H             | -1.36020700 | -1.60509300 | 2.38671300  | C | -2.13089100 | -1.19450300 | -0.04625800 |
| C             | 0.43710300  | -1.44869600 | 3.52373500  | C | -3.49447700 | -0.97188000 | -0.23677800 |
| H             | 0.08703200  | -2.13860200 | 4.28543400  | F | -4.01467400 | 0.26118200  | -0.19224400 |
| C             | 1.69285500  | -0.86165800 | 3.62962200  | C | -4.41341800 | -1.98598500 | -0.49084700 |
| H             | 2.34306800  | -1.08474800 | 4.46943600  | F | -5.70353400 | -1.69786900 | -0.65425600 |
| C             | 2.10198200  | 0.02624700  | 2.64370900  | C | -3.98430400 | -3.29955300 | -0.57408500 |
| H             | 3.08281600  | 0.49210500  | 2.71340100  | F | -4.84749100 | -4.27973500 | -0.82157500 |
| C             | 1.28740200  | 0.32825500  | 1.54547600  | C | -2.63599000 | -3.57831400 | -0.40160400 |
| C             | 1.87214900  | 1.31112700  | 0.54685700  | F | -2.19489200 | -4.83261200 | -0.49546600 |
| H             | 2.58371600  | 1.95397100  | 1.07279400  | C | -1.75931500 | -2.53798200 | -0.13980200 |
|               |             |             |             | F | -0.46416800 | -2.89581200 | -0.00373100 |

|              |             |             |             |   |             |             |             |
|--------------|-------------|-------------|-------------|---|-------------|-------------|-------------|
| C            | -1.64832400 | 1.47826300  | 0.22114000  | C | -5.11479900 | 1.96468400  | 0.07588500  |
| C            | -1.69724200 | 2.41449100  | -0.80358700 | C | -4.98179900 | 0.52308300  | -0.36226900 |
| F            | -1.20429100 | 2.12463700  | -2.02597700 | C | -6.01165300 | -0.07770500 | -1.08301700 |
| C            | -2.23462000 | 3.69042800  | -0.66772700 | C | -5.90289500 | -1.40009500 | -1.49011200 |
| F            | -2.22166500 | 4.54229300  | -1.69314500 | H | -6.70725700 | -1.86388900 | -2.05140700 |
| C            | -2.79469300 | 4.06442900  | 0.54175000  | C | -4.76514700 | -2.13352000 | -1.17795800 |
| F            | -3.32299900 | 5.27513100  | 0.69470200  | H | -4.68932300 | -3.16140500 | -1.51229200 |
| C            | -2.80486800 | 3.15541100  | 1.59169700  | C | -3.70407800 | -1.57812900 | -0.45726100 |
| F            | -3.36139300 | 3.49251400  | 2.75325200  | C | -3.85498700 | -0.24330300 | -0.06188000 |
| C            | -2.24340100 | 1.90043300  | 1.41127200  | C | -2.46713600 | -2.40578500 | -0.14229100 |
| F            | -2.33551800 | 1.05310000  | 2.44285100  | H | -1.59420900 | -1.74844900 | -0.16931600 |
| H            | 6.98573100  | 0.83341900  | 0.77618500  | C | -2.19910900 | -3.48288100 | -1.19680900 |
| H            | 5.93103100  | 2.19561900  | -1.14758200 | H | -1.21051600 | -3.91057800 | -1.02620700 |
| H            | 5.41089000  | 2.85068200  | 0.38593700  | H | -2.21670800 | -3.05330600 | -2.20222100 |
| H            | 1.51513800  | -0.00625400 | -1.18727800 | H | -2.93064000 | -4.29602100 | -1.14101000 |
| C            | 0.16361900  | -0.31230600 | -1.33932500 | C | -2.54746000 | -3.03376800 | 1.25547600  |
| H            | 0.44334600  | -1.15751900 | -0.73164300 | H | -1.63212800 | -3.59808300 | 1.45332900  |
| H            | 0.16172900  | 0.71818200  | -1.01030700 | H | -3.40422700 | -3.71136900 | 1.32840600  |
| C            | -0.57865300 | -1.85188600 | -3.13623300 | H | -2.64983500 | -2.28341100 | 2.04806600  |
| H            | -0.30355200 | -2.72577300 | -2.55132800 | C | -2.36264300 | 1.77734300  | 2.83167600  |
| C            | -0.40760300 | -0.61563400 | -2.66134000 | H | -1.64201900 | 2.42793000  | 2.33599400  |
| H            | -0.72361800 | 0.23054700  | -3.26688600 | H | -1.82075900 | 0.98138100  | 3.34940000  |
| H            | -1.00423300 | -2.02605200 | -4.11783000 | H | -2.87949900 | 2.37458000  | 3.58818300  |
| <b>N20_P</b> |             |             |             | C | -4.31449800 | 0.25143100  | 2.68431900  |
| B            | 1.00838700  | 0.03534600  | 0.14212500  | H | -3.74583700 | -0.62890100 | 2.99834300  |
| C            | -0.00213100 | -0.13803000 | -1.16097300 | H | -5.19353700 | -0.07937200 | 2.13068000  |
| C            | 0.43299300  | -0.88054000 | -2.27368500 | H | -4.64923600 | 0.76456000  | 3.58916600  |
| H            | 1.40672500  | -1.35720600 | -2.22621900 | C | 2.18046300  | -1.12678100 | 0.13845600  |
| C            | -0.31029200 | -1.01966900 | -3.43960700 | C | 3.54444100  | -0.93125900 | 0.33367200  |
| H            | 0.08512500  | -1.60740900 | -4.26306300 | F | 4.06185000  | 0.30230800  | 0.42910500  |
| C            | -1.54955700 | -0.39682300 | -3.55720700 | C | 4.46626300  | -1.96534100 | 0.46756400  |
| H            | -2.13711400 | -0.48388600 | -4.46532400 | F | 5.76164900  | -1.69781600 | 0.64276600  |
| C            | -2.01372700 | 0.35440100  | -2.48831000 | C | 4.03626900  | -3.28139200 | 0.42895800  |
| H            | -2.97976400 | 0.85163200  | -2.56275100 | F | 4.90362900  | -4.28524300 | 0.55674900  |
| C            | -1.26597100 | 0.48124800  | -1.30887200 | C | 2.68413700  | -3.53689200 | 0.26027500  |
| C            | -1.90517700 | 1.30011300  | -0.21543100 | F | 2.23641800  | -4.79569600 | 0.23194800  |
| H            | -2.58001900 | 2.04372100  | -0.64226600 | C | 1.80896000  | -2.46907000 | 0.12996000  |
| H            | -1.17607700 | 1.79592500  | 0.42225200  | F | 0.50319300  | -2.80704600 | 0.00456200  |
| N            | -2.79613500 | 0.44302800  | 0.71262000  | C | 1.62282200  | 1.56089000  | -0.05659200 |
| C            | -3.43191300 | 1.22225300  | 1.89393400  | C | 1.30785700  | 2.69015800  | 0.68489300  |
| C            | -4.24716600 | 2.36708000  | 1.28786300  | F | 0.47443200  | 2.61352000  | 1.75635100  |
| H            | -4.87714400 | 2.75746300  | 2.09220100  | C | 1.77113800  | 3.97366400  | 0.41005800  |
| H            | -3.56724100 | 3.17944800  | 1.01643400  | F | 1.40527000  | 5.00569000  | 1.17637300  |
|              |             |             |             | C | 2.61068400  | 4.17124900  | -0.67058400 |

|               |             |             |             |   |             |             |             |
|---------------|-------------|-------------|-------------|---|-------------|-------------|-------------|
| F             | 3.07090600  | 5.38728000  | -0.96033800 | H | -6.44123100 | -2.58222200 | 1.32474700  |
| C             | 2.96218200  | 3.07958200  | -1.45542900 | C | -4.43775900 | -2.63400300 | 0.53748300  |
| F             | 3.77083600  | 3.25379300  | -2.50096200 | C | -3.35724400 | -1.84634200 | 0.15581500  |
| C             | 2.46373000  | 1.82580800  | -1.14035800 | H | -2.46205100 | -2.33382300 | -0.21217800 |
| F             | 2.84929500  | 0.82172600  | -1.94044900 | C | -3.40265700 | -0.44941500 | 0.22903900  |
| H             | -6.90051100 | 0.50084100  | -1.31753700 | C | -6.07951000 | 2.21148400  | 0.27134700  |
| H             | -6.17038300 | 2.15528000  | 0.28614800  | H | -6.08126900 | 3.30432000  | 0.22638200  |
| H             | -4.86393600 | 2.60838500  | -0.77582500 | H | -6.87165800 | 1.91227100  | 0.96008000  |
| H             | -2.16655300 | -0.26377400 | 1.11702400  | H | -6.32807700 | 1.82640500  | -0.72231800 |
| C             | 0.26393100  | -0.20843200 | 1.60716300  | C | -4.34924000 | -4.13614100 | 0.46720600  |
| H             | -0.21920800 | -1.19856900 | 1.58850200  | H | -5.31231900 | -4.57536800 | 0.19610800  |
| H             | -0.50178000 | 0.54552600  | 1.78282900  | H | -4.05695300 | -4.55379800 | 1.43596200  |
| C             | 1.55701400  | -1.19911200 | 3.52269500  | H | -3.60635100 | -4.45120300 | -0.26931600 |
| H             | 1.15198100  | -2.19171800 | 3.33471500  | C | 0.83635800  | 1.07643800  | -0.28896400 |
| C             | 1.19663000  | -0.15587900 | 2.77740500  | C | 0.87172500  | 1.68804300  | -1.54027500 |
| H             | 1.63641300  | 0.81927400  | 2.98925300  | F | 0.69652400  | 0.98185600  | -2.66418800 |
| H             | 2.27468100  | -1.10466200 | 4.33093700  | C | 1.04792700  | 3.05852500  | -1.71217100 |
| <b>N21_TS</b> |             |             |             | F | 1.03411100  | 3.59536900  | -2.93082800 |
| B             | 0.71577800  | -0.52447300 | -0.02685600 | C | 1.25076800  | 3.86795200  | -0.60429700 |
| C             | 0.06202800  | -1.47373100 | -1.16322700 | F | 1.42334900  | 5.17725300  | -0.75193200 |
| C             | 0.63439900  | -2.73013100 | -1.40755300 | C | 1.29658200  | 3.29336900  | 0.65952000  |
| H             | 1.52203300  | -3.01895800 | -0.85213200 | F | 1.53513500  | 4.05313700  | 1.72641900  |
| C             | 0.11784200  | -3.63041300 | -2.33611900 | C | 1.11596700  | 1.92344900  | 0.78269600  |
| H             | 0.60481100  | -4.58855200 | -2.48783900 | F | 1.24536400  | 1.40503400  | 2.00948800  |
| C             | -1.01338500 | -3.29345400 | -3.06742000 | C | 2.26728100  | -0.94097300 | 0.35808100  |
| H             | -1.42345400 | -3.97645100 | -3.80418700 | C | 3.15619600  | -0.93643100 | -0.72388500 |
| C             | -1.62964800 | -2.07061300 | -2.82500700 | F | 2.69499200  | -0.67279700 | -1.95389000 |
| H             | -2.53987500 | -1.81205500 | -3.36023100 | C | 4.51875400  | -1.17144400 | -0.62252700 |
| C             | -1.11891700 | -1.17535700 | -1.88437700 | F | 5.29421000  | -1.16098500 | -1.70497500 |
| C             | -1.91674500 | 0.08363900  | -1.63285600 | C | 5.07542500  | -1.40396500 | 0.62725200  |
| H             | -2.86547100 | 0.03987200  | -2.17735400 | F | 6.37910900  | -1.62969400 | 0.75448900  |
| H             | -1.37828400 | 0.96379500  | -1.98219500 | C | 4.25112200  | -1.38959800 | 1.73831100  |
| N             | -2.20764300 | 0.28733100  | -0.17601900 | F | 4.76465000  | -1.59501600 | 2.95009200  |
| C             | -2.26580300 | 1.72718700  | 0.19300500  | C | 2.88763800  | -1.14869400 | 1.58834500  |
| C             | -3.60792000 | 2.34601600  | -0.14690900 | F | 2.20035100  | -1.13766900 | 2.74647800  |
| H             | -3.83179200 | 2.19675200  | -1.21194900 | H | -1.12212900 | -0.25211200 | 0.52263100  |
| H             | -3.56870400 | 3.42597000  | 0.02463200  | H | -1.44881300 | 2.23012300  | -0.32329700 |
| C             | -4.69991700 | 1.71396200  | 0.70889000  | H | -2.07063100 | 1.79762900  | 1.26905100  |
| H             | -4.53141800 | 2.03705100  | 1.74711300  | C | -0.48803900 | -0.95783100 | 1.49125200  |
| C             | -4.56896800 | 0.19878000  | 0.66683500  | H | -0.99858900 | -1.89596900 | 1.25348200  |
| C             | -5.63873400 | -0.61000800 | 1.06818600  | H | 0.47737000  | -1.26356700 | 1.87519000  |
| H             | -6.54706100 | -0.13661300 | 1.42582300  | C | -0.63087400 | 0.18027400  | 3.75016300  |
| C             | -5.58405500 | -1.99358400 | 1.01023900  | H | 0.43945400  | 0.11598500  | 3.91264400  |
|               |             |             |             | C | -1.19758700 | -0.27361900 | 2.63432300  |



|              |             |             |             |              |             |             |             |
|--------------|-------------|-------------|-------------|--------------|-------------|-------------|-------------|
| H            | -2.28127000 | -0.19700700 | 2.53540500  | F            | -0.24880700 | 1.68408800  | 2.00385400  |
| H            | -1.22984300 | 0.62997100  | 4.53538500  | C            | -1.46166200 | 3.45201300  | 1.16109800  |
| <b>N21_P</b> |             |             |             | F            | -1.09747800 | 4.16553800  | 2.22964800  |
| B            | -0.92036200 | -0.26187000 | -0.33451600 | C            | -2.27875600 | 4.02081100  | 0.19897000  |
| C            | 0.11517200  | -0.89957500 | 0.79063700  | F            | -2.70207000 | 5.27741400  | 0.32609800  |
| C            | -0.20898300 | -2.08952200 | 1.46474000  | C            | -2.64490800 | 3.26019800  | -0.90105500 |
| H            | -1.14460400 | -2.58664000 | 1.22857200  | F            | -3.44012300 | 3.78437700  | -1.83535500 |
| C            | 0.60163200  | -2.66328300 | 2.44189000  | C            | -2.18119300 | 1.95566300  | -1.01244900 |
| H            | 0.28621700  | -3.58163900 | 2.92871800  | F            | -2.61921400 | 1.28350800  | -2.09082200 |
| C            | 1.78939300  | -2.04624000 | 2.81821200  | C            | -2.36715700 | -1.05779900 | -0.21925400 |
| H            | 2.41106400  | -2.45845100 | 3.60654800  | C            | -3.12355900 | -0.88878800 | 0.94247400  |
| C            | 2.16384300  | -0.88391800 | 2.15778600  | F            | -2.63433200 | -0.14760100 | 1.94921400  |
| H            | 3.10036300  | -0.39236400 | 2.41538400  | C            | -4.36758900 | -1.46399600 | 1.15656500  |
| C            | 1.36711800  | -0.34859000 | 1.14180300  | F            | -5.03273700 | -1.25913400 | 2.29501100  |
| C            | 1.92710100  | 0.82404300  | 0.39493100  | C            | -4.91949300 | -2.26830500 | 0.16889200  |
| H            | 2.62049100  | 1.40390100  | 1.00689800  | F            | -6.11029300 | -2.83779600 | 0.34974900  |
| H            | 1.15434300  | 1.47602700  | -0.01582500 | C            | -4.20859600 | -2.48225400 | -0.99927900 |
| N            | 2.72807500  | 0.34307200  | -0.82437000 | F            | -4.71804700 | -3.26397400 | -1.95386100 |
| C            | 3.02797300  | 1.45337100  | -1.78428400 | C            | -2.96175500 | -1.88423200 | -1.16586900 |
| C            | 4.00915400  | 2.42418700  | -1.15437400 | F            | -2.34346800 | -2.17941200 | -2.32562600 |
| H            | 3.54879300  | 2.88801400  | -0.27532400 | H            | 2.11702200  | -0.34033100 | -1.30930200 |
| H            | 4.19739300  | 3.23737100  | -1.86059100 | H            | 2.07691400  | 1.92738500  | -2.03599700 |
| C            | 5.33639300  | 1.75202000  | -0.76809400 | H            | 3.44298400  | 0.98481700  | -2.68161800 |
| H            | 5.99000300  | 1.77020500  | -1.65073200 | C            | -0.28091800 | -0.36524000 | -1.86953000 |
| C            | 5.16874600  | 0.28602300  | -0.39941600 | H            | -1.10419400 | -0.28966600 | -2.58312600 |
| C            | 6.27920400  | -0.47844300 | -0.02949400 | H            | 0.35834500  | 0.50369100  | -2.10299300 |
| H            | 7.25405000  | -0.00166100 | 0.01615500  | C            | 1.57710700  | -1.73344600 | -2.91016900 |
| C            | 6.16827900  | -1.82983500 | 0.27219000  | H            | 1.99008800  | -0.87021100 | -3.43465700 |
| H            | 7.05318000  | -2.38617600 | 0.56759700  | C            | 0.46893600  | -1.62734000 | -2.16584000 |
| C            | 4.93945700  | -2.48848600 | 0.19596100  | H            | 0.06797700  | -2.53683400 | -1.71693300 |
| C            | 3.82622300  | -1.74855300 | -0.19474400 | H            | 2.07075500  | -2.68469200 | -3.08034500 |
| H            | 2.84930100  | -2.22057800 | -0.26276300 | <b>P1_TS</b> |             |             |             |
| C            | 3.95177600  | -0.39112900 | -0.46817000 | P            | 1.26379300  | 0.00573400  | 0.23171300  |
| C            | 6.01837500  | 2.55195800  | 0.34673100  | C            | 0.88734300  | -1.08183900 | -1.16381800 |
| H            | 6.12581000  | 3.59912300  | 0.04961600  | C            | -0.42213100 | -1.59524300 | -1.12839500 |
| H            | 7.01249800  | 2.16501200  | 0.57899800  | B            | -1.45869600 | -1.13432100 | 0.00658300  |
| H            | 5.41851300  | 2.51457400  | 1.26152600  | C            | 1.80599900  | -1.45188200 | -2.14854400 |
| C            | 4.78820600  | -3.94712800 | 0.53420400  | C            | 1.41232700  | -2.34231600 | -3.14004900 |
| H            | 4.00584400  | -4.08167900 | 1.28699700  | C            | 0.11482200  | -2.85711600 | -3.13358900 |
| H            | 5.71919900  | -4.36315000 | 0.92368400  | C            | -0.78863100 | -2.48701200 | -2.14210300 |
| H            | 4.49894900  | -4.52602400 | -0.34777600 | O            | -2.79123700 | -1.69852100 | -0.08468200 |
| C            | -1.33940800 | 1.33332400  | -0.08677100 | O            | -1.62273700 | 0.31685800  | 0.10335300  |
| C            | -1.02959200 | 2.13828500  | 1.00825200  | C            | -2.96162300 | 0.54861900  | 0.15357500  |

|   |             |             |             |             |             |             |
|---|-------------|-------------|-------------|-------------|-------------|-------------|
| C | -3.61591000 | 1.75511000  | 0.27938500  |             |             |             |
| C | -5.02008600 | 1.72634000  | 0.29446600  | <b>PI_P</b> |             |             |
| C | -5.71521500 | 0.52846500  | 0.18576100  | P           | -1.25598700 | -0.04999500 |
| C | -5.03905800 | -0.69563600 | 0.05496600  | C           | -0.82608500 | -1.21172800 |
| C | -3.66094100 | -0.65891700 | 0.03841500  | C           | 0.46151500  | -1.77070400 |
| H | -3.05713800 | 2.68075300  | 0.36339200  | B           | 1.58023300  | -1.52599300 |
| H | -5.56770300 | 2.65798500  | 0.39272400  | C           | -1.80164500 | -1.46831000 |
| H | -6.80015700 | 0.53443600  | 0.20018600  | C           | -1.48657600 | -2.29530600 |
| H | -5.56878300 | -1.63772200 | -0.03179600 | C           | -0.21085900 | -2.85865200 |
| C | 1.11924300  | 1.74186800  | -0.27618100 | C           | 0.73579800  | -2.60051700 |
| C | 3.00055400  | -0.25207100 | 0.70279500  | O           | 2.93380300  | -1.41070500 |
| C | 4.04811900  | 0.39932700  | 0.03982500  | O           | 1.32232800  | -0.14609600 |
| C | 5.36662000  | 0.13920000  | 0.39796500  | C           | 2.38656600  | 0.62260000  |
| C | 5.64832600  | -0.76706400 | 1.41830800  | C           | 2.58372400  | 1.96122000  |
| C | 4.61081500  | -1.41297300 | 2.08455600  | C           | 3.76167600  | 2.56058200  |
| C | 3.28984700  | -1.15477700 | 1.73036500  | C           | 4.69358500  | 1.81852300  |
| H | 3.82906000  | 1.11765900  | -0.74564200 | C           | 4.48932500  | 0.45567000  |
| H | 6.17520900  | 0.64621700  | -0.11831300 | C           | 3.32756300  | -0.13419700 |
| H | 6.67818500  | -0.96622500 | 1.69662600  | H           | 1.83661300  | 2.52526200  |
| H | 4.82738700  | -2.11346100 | 2.88421700  | H           | 3.94234000  | 3.61248500  |
| H | 2.48178900  | -1.65367400 | 2.25826600  | H           | 5.60033800  | 2.29669600  |
| C | 1.75607800  | 2.73738100  | 0.47242900  | H           | 5.21399600  | -0.13112600 |
| C | 1.60238600  | 4.07428700  | 0.12184900  | C           | -0.80495800 | 1.65149200  |
| C | 0.80857200  | 4.42185800  | -0.96871300 | C           | -3.05572100 | -0.08825100 |
| C | 0.16922500  | 3.43148600  | -1.71020400 | C           | -3.89686900 | 0.84907800  |
| C | 0.32122000  | 2.09157600  | -1.36878700 | C           | -5.27597700 | 0.74374100  |
| H | 2.37508800  | 2.46868900  | 1.32417600  | C           | -5.81406100 | -0.29052400 |
| H | 2.09961300  | 4.84422300  | 0.70264900  | C           | -4.97702600 | -1.22622600 |
| H | 0.68754800  | 5.46580100  | -1.23959100 | C           | -3.59953100 | -1.12728500 |
| H | -0.45134900 | 3.70089900  | -2.55835500 | H           | -3.47492800 | 1.65932900  |
| H | -0.18695400 | 1.31734400  | -1.93417500 | H           | -5.92958100 | 1.47190500  |
| H | 2.81849700  | -1.05638500 | -2.13386700 | H           | -6.88932200 | -0.36770900 |
| H | 2.11329000  | -2.63832500 | -3.91397800 | H           | -5.39690500 | -2.03070400 |
| H | -0.18926200 | -3.55330100 | -3.90978700 | H           | -2.94662200 | -1.86051800 |
| H | -1.79898900 | -2.88627200 | -2.14042800 | C           | -1.21397400 | 2.68630600  |
| H | 0.11775900  | -0.75521900 | 1.10650700  | C           | -0.84290100 | 3.99379100  |
| C | -0.82750200 | -1.79316100 | 1.69101700  | C           | -0.07778600 | 4.26591000  |
| H | 0.15767700  | -2.17433500 | 2.00131800  | C           | 0.32666600  | 3.23390200  |
| C | -2.76366400 | -1.27052300 | 3.18473300  | C           | -0.02866600 | 1.91914500  |
| H | -3.36532500 | -2.05364300 | 2.73054500  | H           | -1.81886500 | 2.47296100  |
| C | -1.50795100 | -1.05883000 | 2.79410000  | H           | -1.15056500 | 4.80009600  |
| H | -0.94516600 | -0.24485600 | 3.25446900  | H           | 0.21075000  | 5.28818400  |
| H | -3.23606500 | -0.65773800 | 3.94499900  | H           | 0.94292800  | 3.44422700  |
| H | -1.37853500 | -2.70089600 | 1.42311000  | H           | 0.31660400  | 1.10318900  |

|   |             |             |             |   |             |             |             |
|---|-------------|-------------|-------------|---|-------------|-------------|-------------|
| H | -2.79371700 | -1.03124800 | 1.82082700  | H | 0.07688600  | 1.90722600  | 1.55607900  |
| H | -2.22879000 | -2.49950300 | 3.72377100  | C | -1.41895600 | 4.57567900  | 0.06890700  |
| H | 0.04001300  | -3.50114300 | 3.87773200  | H | -2.82919100 | 4.45667200  | -1.55386500 |
| H | 1.73075200  | -3.03173500 | 2.12809600  | H | 0.00440600  | 4.38337900  | 1.67255900  |
| H | -0.77316600 | -0.45070700 | -1.63611800 | H | -1.44403600 | 5.65967900  | 0.11544600  |
| C | 1.50511800  | -2.67332600 | -1.35372900 | O | 2.95491600  | -1.10482100 | 0.28234700  |
| H | 0.47042000  | -2.73931600 | -1.73102600 | O | 1.52708100  | 0.65451100  | -0.15760200 |
| C | 3.53706200  | -3.05185900 | -2.78885300 | C | 2.79478900  | 1.02517000  | -0.70064800 |
| H | 3.81239100  | -3.94902300 | -2.24018900 | C | 3.01925200  | 2.50367400  | -0.41279600 |
| C | 2.44019300  | -2.36469400 | -2.47895700 | H | 4.02417900  | 2.81364700  | -0.71827000 |
| H | 2.21436300  | -1.45867300 | -3.04359300 | H | 2.28995100  | 3.09605700  | -0.97313900 |
| H | 4.20281000  | -2.73775800 | -3.58636700 | H | 2.88919600  | 2.72261500  | 0.64905900  |
| H | 1.74078700  | -3.65316700 | -0.91859600 | C | 2.76781300  | 0.78601700  | -2.21006500 |

#### P2\_TS

|   |             |             |             |
|---|-------------|-------------|-------------|
| C | -1.60522000 | -1.04339600 | 2.44013700  |
| C | -0.73826200 | -0.75337400 | 1.38486000  |
| C | 0.62164400  | -1.11143000 | 1.41094300  |
| C | 1.09363800  | -1.75434800 | 2.55963900  |
| C | 0.24285500  | -2.03816500 | 3.62436700  |
| C | -1.10625000 | -1.68493100 | 3.56790500  |
| H | -2.65822400 | -0.78015800 | 2.37834900  |
| H | 2.14467600  | -2.02770300 | 2.60242400  |
| H | 0.62823200  | -2.54080800 | 4.50682100  |
| H | -1.76585100 | -1.91399200 | 4.39877500  |
| B | 1.60139400  | -0.72298500 | 0.20529200  |
| P | -1.25246900 | -0.01444600 | -0.18287400 |
| C | -2.92289800 | -0.61480300 | -0.56780500 |
| C | -4.07005200 | -0.02097900 | -0.02748700 |
| C | -3.04748300 | -1.73501700 | -1.39539500 |
| C | -5.32486500 | -0.55083200 | -0.30810500 |
| H | -3.98052700 | 0.86034300  | 0.60224300  |
| C | -4.30585500 | -2.26190300 | -1.67200600 |
| H | -2.15828800 | -2.19253900 | -1.82182800 |
| C | -5.44287700 | -1.67097800 | -1.12879700 |
| H | -6.21184100 | -0.08901600 | 0.11324700  |
| H | -4.39578500 | -3.13057400 | -2.31580100 |
| H | -6.42380700 | -2.08107000 | -1.34679800 |
| C | -1.35608400 | 1.79172600  | -0.04501900 |
| C | -2.16590800 | 2.51211100  | -0.92923800 |
| C | -0.57106000 | 2.46992200  | 0.89219900  |
| C | -2.19803200 | 3.90153800  | -0.86760700 |
| H | -2.77383600 | 1.98950700  | -1.66270400 |
| C | -0.60647900 | 3.85915900  | 0.94477300  |

|   |             |             |             |
|---|-------------|-------------|-------------|
| H | 0.07688600  | 1.90722600  | 1.55607900  |
| C | -1.41895600 | 4.57567900  | 0.06890700  |
| H | -2.82919100 | 4.45667200  | -1.55386500 |
| H | 0.00440600  | 4.38337900  | 1.67255900  |
| H | -1.44403600 | 5.65967900  | 0.11544600  |
| O | 2.95491600  | -1.10482100 | 0.28234700  |
| O | 1.52708100  | 0.65451100  | -0.15760200 |
| C | 2.79478900  | 1.02517000  | -0.70064800 |
| C | 3.01925200  | 2.50367400  | -0.41279600 |
| H | 4.02417900  | 2.81364700  | -0.71827000 |
| H | 2.28995100  | 3.09605700  | -0.97313900 |
| H | 2.88919600  | 2.72261500  | 0.64905900  |
| C | 2.76781300  | 0.78601700  | -2.21006500 |
| H | 2.65365100  | -0.27686400 | -2.43470800 |
| H | 1.91655900  | 1.32916700  | -2.63131700 |
| H | 3.68307400  | 1.14876500  | -2.68807600 |
| C | 3.76419900  | 0.05261200  | 0.05361400  |
| C | 4.99168100  | -0.35614900 | -0.74819200 |
| H | 5.58034800  | 0.52111000  | -1.03766100 |
| H | 5.62467200  | -1.00777900 | -0.13961600 |
| H | 4.69673800  | -0.90653900 | -1.64387300 |
| C | 4.17172900  | 0.58812400  | 1.42668600  |
| H | 3.28572800  | 0.88299800  | 1.99792600  |
| H | 4.67964400  | -0.21061000 | 1.97364300  |
| H | 4.84851800  | 1.44455500  | 1.35075000  |
| H | -0.06533200 | -0.71044100 | -0.96706800 |
| C | 0.78012700  | -1.96492500 | -1.35054200 |
| H | 0.36876200  | -1.65777100 | -2.32650800 |
| H | 0.04371500  | -2.62512900 | -0.86777100 |
| C | 2.61619800  | -2.85091700 | -2.81944900 |
| H | 2.21587200  | -2.35458800 | -3.70087100 |
| C | 2.01516200  | -2.75050400 | -1.63071400 |
| H | 2.45853400  | -3.26437500 | -0.78028900 |
| H | 3.52461500  | -3.43017100 | -2.94944700 |

#### P2\_P

|   |             |             |            |
|---|-------------|-------------|------------|
| C | -1.37691200 | -1.59462100 | 1.87990500 |
| C | -0.53606300 | -1.11649100 | 0.85841600 |
| C | 0.84085400  | -1.37833800 | 0.80719200 |
| C | 1.35203300  | -2.16097300 | 1.85560100 |
| C | 0.54456300  | -2.63697100 | 2.87996400 |
| C | -0.82584400 | -2.35552800 | 2.89808600 |
| H | -2.44254600 | -1.37783200 | 1.87498700 |
| H | 2.41712100  | -2.37827500 | 1.84284200 |



|   |             |             |             |      |             |             |             |
|---|-------------|-------------|-------------|------|-------------|-------------|-------------|
| C | -5.90595900 | 1.46980700  | 0.42015800  | C    | -0.57062900 | 2.35559700  | -2.98942100 |
| H | -4.82825900 | -0.38440600 | 0.29767000  | H    | -1.62538100 | 2.20092900  | -3.21930800 |
| C | -5.91442000 | 2.82667500  | 0.10165600  | H    | -0.65422000 | 4.42339600  | -3.41656700 |
| H | -4.84853500 | 4.44388400  | -0.83660300 | H    | 1.26098000  | 1.47446200  | -2.63637000 |
| H | -6.73837000 | 1.02984600  | 0.95941200  |      |             |             |             |
| H | -6.75710500 | 3.44560400  | 0.39264500  | P3_P |             |             |             |
| C | -3.01424000 | -1.25744200 | -1.96930100 | C    | -1.44929600 | -0.30581500 | 0.14217100  |
| C | -2.24761400 | -2.42869700 | -2.01932400 | C    | -0.09346400 | -0.27205700 | 0.12393300  |
| C | -4.23436100 | -1.19668800 | -2.64917300 | C    | -2.28606300 | -0.69880000 | 1.32349400  |
| C | -2.71232900 | -3.53154200 | -2.72813400 | C    | -3.03134800 | -1.88094300 | 1.34612300  |
| H | -1.30089500 | -2.48311200 | -1.48972800 | C    | -2.36611000 | 0.18208100  | 2.40755800  |
| C | -4.69005800 | -2.30434800 | -3.35863800 | C    | -3.84522200 | -2.17538200 | 2.43769700  |
| H | -4.83170800 | -0.29026500 | -2.61735900 | H    | -2.95669600 | -2.58036600 | 0.51829400  |
| C | -3.93281600 | -3.47218600 | -3.39704300 | C    | -3.17705400 | -0.11548700 | 3.49670800  |
| H | -2.11827200 | -4.43914700 | -2.75372400 | H    | -1.77616100 | 1.09521300  | 2.38656700  |
| H | -5.64080100 | -2.25383400 | -3.87939700 | C    | -3.92306300 | -1.29271300 | 3.51066400  |
| H | -4.29260600 | -4.33512900 | -3.94800000 | H    | -4.41235300 | -3.10058800 | 2.45157600  |
| C | 2.07512300  | -0.36052300 | -1.40193100 | H    | -3.22797900 | 0.57204600  | 4.33463300  |
| C | 2.04609300  | -1.74381200 | -1.54198100 | H    | -4.55645500 | -1.52502400 | 4.36061600  |
| C | 3.21691600  | 0.22812900  | -1.95833400 | C    | 0.48769000  | -0.89052300 | 1.37420000  |
| C | 3.07679900  | -2.50264400 | -2.08627900 | C    | 1.13340900  | -0.17223400 | 2.37853100  |
| C | 4.27087100  | -0.48049800 | -2.51259900 | C    | 0.31482500  | -2.25608200 | 1.62733900  |
| C | 4.20704400  | -1.86629700 | -2.56772700 | C    | 1.67443700  | -0.77741400 | 3.50610400  |
| C | 1.23480500  | 1.91880800  | -0.07348700 | C    | 0.85330800  | -2.88716700 | 2.73823100  |
| C | 0.26923900  | 2.89856800  | 0.12782500  | C    | 1.54997300  | -2.14571800 | 3.68129900  |
| C | 2.48629600  | 2.23359300  | 0.45422000  | F    | -0.43071900 | -3.01580700 | 0.81875700  |
| C | 0.51831100  | 4.13766700  | 0.70341900  | F    | 0.67800100  | -4.19405100 | 2.91757100  |
| C | 2.78649400  | 3.45512900  | 1.03720100  | F    | 2.06071500  | -2.73586300 | 4.75581000  |
| C | 1.79713400  | 4.42285800  | 1.15213400  | F    | 2.27611200  | -0.03876000 | 4.43402100  |
| F | 2.96760900  | -3.82745600 | -2.16825400 | F    | 1.17085900  | 1.16140200  | 2.34984800  |
| F | 0.96381200  | -2.44263200 | -1.16647900 | B    | 0.95895800  | 0.40608100  | -0.99728900 |
| F | 3.32433600  | 1.56574700  | -2.02790800 | P    | -2.51052800 | 0.15293200  | -1.23403400 |
| F | 5.32939500  | 0.15502600  | -3.00958800 | C    | -4.00942500 | 0.97134300  | -0.65092000 |
| F | 5.20345700  | -2.56616400 | -3.09759800 | C    | -4.02304000 | 2.36860300  | -0.58385900 |
| F | 3.45590700  | 1.31087600  | 0.49950000  | C    | -5.11461000 | 0.23047200  | -0.21761000 |
| F | 4.00355800  | 3.69645900  | 1.52096400  | C    | -5.14657800 | 3.01856100  | -0.08173900 |
| F | 2.06894400  | 5.59640600  | 1.71424300  | H    | -3.15937300 | 2.94492700  | -0.89955600 |
| F | -0.45859900 | 5.03498500  | 0.83795200  | C    | -6.22995300 | 0.89039200  | 0.28289800  |
| F | -1.00922600 | 2.65990700  | -0.22277700 | H    | -5.09985800 | -0.85407700 | -0.26579300 |
| H | -0.84862300 | 0.74663100  | -1.70752900 | C    | -6.24544700 | 2.28224600  | 0.35055300  |

|              |             |             |             |   |             |             |             |
|--------------|-------------|-------------|-------------|---|-------------|-------------|-------------|
| C            | -2.09441300 | -2.42738000 | -2.16451200 | H | -0.65594600 | -1.18737000 | -2.29877100 |
| C            | -4.10023300 | -1.32278100 | -2.98265900 | H | 0.81455600  | -0.45215800 | -1.62213500 |
| C            | -2.40008500 | -3.53813000 | -2.94595900 | C | 0.40658900  | -2.38612200 | -0.75372400 |
| H            | -1.20091400 | -2.42185500 | -1.54443100 | H | -0.46191500 | -3.02362500 | -0.54006700 |
| C            | -4.39404000 | -2.43858600 | -3.75813300 | H | 1.00306200  | -2.93985500 | -1.48985500 |
| H            | -4.76283900 | -0.46204600 | -2.99276800 | P | -1.03811600 | -0.30815800 | -0.02399000 |
| C            | -3.54537900 | -3.54365100 | -3.73835300 | B | 1.38766600  | -2.19143100 | 0.54105900  |
| H            | -1.73994400 | -4.39841200 | -2.93311200 | C | -1.21451400 | 1.51984800  | 0.04583100  |
| H            | -5.28479900 | -2.44491300 | -4.37696200 | C | -2.01884900 | 2.00723700  | 1.10066700  |
| H            | -3.77936200 | -4.41330500 | -4.34369300 | C | -0.59322100 | 2.43759700  | -0.82731100 |
| C            | 2.34535600  | -0.47901500 | -1.15522200 | C | -2.23605500 | 3.37944900  | 1.22041500  |
| C            | 2.36791800  | -1.86641400 | -1.12939100 | C | -0.83891100 | 3.80053100  | -0.66048500 |
| C            | 3.53277100  | 0.07986200  | -1.63432400 | C | -1.66169900 | 4.29585900  | 0.34648600  |
| C            | 3.48228700  | -2.64886300 | -1.41393000 | H | -2.86696100 | 3.73805100  | 2.03057900  |
| C            | 4.67411900  | -0.64926900 | -1.93320400 | H | -0.36395700 | 4.49955900  | -1.34493500 |
| C            | 4.65579400  | -2.03207100 | -1.80927300 | C | -2.73419500 | -0.97023600 | -0.31071200 |
| C            | 1.23010800  | 1.91164100  | -0.35953800 | C | -3.53909900 | -0.47755300 | -1.35856600 |
| C            | 0.25119800  | 2.89528000  | -0.41651000 | C | -3.23314800 | -1.98872200 | 0.53051300  |
| C            | 2.37322400  | 2.32426100  | 0.32687500  | C | -4.81406600 | -1.01628300 | -1.54511100 |
| C            | 0.38800300  | 4.19456300  | 0.05073700  | C | -4.51360900 | -2.49070400 | 0.30595800  |
| C            | 2.57201800  | 3.61157000  | 0.80621200  | C | -5.32033000 | -2.02116300 | -0.72782800 |
| C            | 1.57419000  | 4.56451600  | 0.65990600  | H | -5.42850100 | -0.63202100 | -2.35617600 |
| F            | 3.41464900  | -3.97965600 | -1.33780100 | H | -4.89166600 | -3.27210900 | 0.96114100  |
| F            | 1.23809800  | -2.55401300 | -0.86227800 | C | -3.10611300 | 0.63171200  | -2.28565200 |
| F            | 3.61231500  | 1.39972800  | -1.87752900 | H | -3.17224800 | 1.60719900  | -1.79366500 |
| F            | 5.77816200  | -0.03860200 | -2.36380500 | H | -2.07326700 | 0.51099100  | -2.62102200 |
| F            | 5.73955600  | -2.75129200 | -2.09439800 | H | -3.74520800 | 0.65171300  | -3.17061400 |
| F            | 3.33461900  | 1.44690500  | 0.64492500  | C | -6.68900600 | -2.60412200 | -0.96146100 |
| F            | 3.69894200  | 3.92959200  | 1.44357300  | H | -7.20992000 | -2.77606200 | -0.01603400 |
| F            | 1.74260300  | 5.80055100  | 1.12433200  | H | -7.30260600 | -1.94360400 | -1.57770200 |
| F            | -0.61697600 | 5.06816900  | -0.06885600 | H | -6.61541200 | -3.56811000 | -1.47523200 |
| F            | -0.96986300 | 2.60888800  | -0.93239300 | C | -2.44145400 | -2.55856700 | 1.68115400  |
| H            | -1.92215700 | 1.07207600  | -2.09329000 | H | -1.54024200 | -3.07183700 | 1.33526700  |
| C            | 0.42559300  | 0.46244600  | -2.60579200 | H | -2.12219000 | -1.77925700 | 2.37958200  |
| H            | -0.36060600 | -0.28553500 | -2.78462000 | H | -3.04450100 | -3.27954800 | 2.23640400  |
| C            | 0.95724500  | 2.72393500  | -3.55104400 | C | 0.35158000  | 2.04369700  | -1.93429800 |
| H            | 2.00340900  | 2.61039100  | -3.27736500 | H | 1.28478200  | 1.64690000  | -1.52253900 |
| C            | 0.07353600  | 1.76621900  | -3.27693400 | H | -0.07018600 | 1.29062700  | -2.60370700 |
| H            | -0.96174300 | 1.93906500  | -3.58186700 | H | 0.60656800  | 2.91801600  | -2.53569300 |
| H            | 0.66651500  | 3.64325000  | -4.04859900 | C | -1.88390400 | 5.77579600  | 0.51218700  |
| H            | 1.26744300  | 0.06494900  | -3.18010100 | H | -1.13472300 | 6.20526200  | 1.18531800  |
|              |             |             |             | H | -1.80562800 | 6.29710000  | -0.44469500 |
|              |             |             |             | H | -2.86833700 | 5.98273300  | 0.93862300  |
| <b>P4_TS</b> |             |             |             | C | -2.65345100 | 1.10539500  | 2.13255100  |
| C            | -0.05836900 | -1.06262800 | -1.39047000 |   |             |             |             |

|             |             |             |             |   |             |             |             |
|-------------|-------------|-------------|-------------|---|-------------|-------------|-------------|
| H           | -3.47494600 | 0.51309200  | 1.71778400  | C | -2.37837700 | -2.57569700 | 0.61349700  |
| H           | -1.92084200 | 0.40620800  | 2.55072300  | C | -4.25804100 | -2.75867300 | -1.45544600 |
| H           | -3.04822100 | 1.70044900  | 2.95807700  | C | -3.15214800 | -3.72392000 | 0.43258600  |
| H           | 0.06418500  | -1.10110000 | 1.09548200  | C | -4.09477000 | -3.83551000 | -0.58406300 |
| H           | 1.76529900  | -3.26430900 | 0.93017100  | H | -4.98076200 | -2.83344600 | -2.26457400 |
| C           | 3.74909300  | -1.76483000 | -0.49936000 | H | -3.00399700 | -4.55922900 | 1.11155600  |
| C           | 2.62923400  | -1.23026800 | 0.12928700  | C | -3.70926500 | -0.49071300 | -2.33852300 |
| C           | 2.65501500  | 0.14851400  | 0.28489900  | H | -4.00520600 | 0.45360800  | -1.87224500 |
| C           | 3.69630900  | 0.96101500  | -0.13895300 | H | -2.78912800 | -0.31690600 | -2.90676700 |
| C           | 4.79677000  | 0.37884300  | -0.75236400 | H | -4.48301000 | -0.76803100 | -3.05607600 |
| C           | 4.82411900  | -0.99640500 | -0.93345400 | C | -4.91062300 | -5.08775400 | -0.76110900 |
| F           | 3.82370300  | -3.08273100 | -0.72865600 | H | -5.97964100 | -4.85741700 | -0.77369000 |
| F           | 5.87477300  | -1.56342400 | -1.52784900 | H | -4.66947400 | -5.57370000 | -1.71129300 |
| F           | 5.80844100  | 1.13502800  | -1.17538100 | H | -4.72312000 | -5.80255100 | 0.04193300  |
| F           | 3.63389300  | 2.28616800  | 0.01123100  | C | -1.37606000 | -2.56871500 | 1.74525900  |
| F           | 1.60231800  | 0.77526900  | 0.85707500  | H | -0.35181600 | -2.37755800 | 1.40566800  |
| C           | 0.78054200  | -1.65438700 | 2.24361900  | H | -1.62240000 | -1.81592400 | 2.50294200  |
| H           | 0.19030400  | -0.79587600 | 2.59795600  | H | -1.38094600 | -3.53894600 | 2.24398400  |
| H           | 0.24443800  | -2.54960400 | 2.56504400  | C | -1.80875200 | 2.56642700  | -2.09642200 |
| C           | 2.50637200  | -0.44989500 | 3.60260900  | H | -0.74014200 | 2.67407700  | -1.89287900 |
| H           | 1.88912500  | 0.44290300  | 3.65931700  | H | -1.94515500 | 1.65658100  | -2.68431500 |
| C           | 2.10002400  | -1.53511300 | 2.94774000  | H | -2.11021300 | 3.40903600  | -2.72047800 |
| H           | 2.75145200  | -2.40470600 | 2.88355500  | C | -5.02170300 | 5.00384200  | 0.85603900  |
| H           | 3.47497300  | -0.41387300 | 4.08958100  | H | -4.42311800 | 5.76698900  | 1.36373900  |
| <b>P4_P</b> |             |             |             | H | -5.39004900 | 5.43836100  | -0.07592600 |
| C           | -0.15072700 | 0.03409000  | -1.16482500 | H | -5.87777800 | 4.77441700  | 1.49409500  |
| H           | -0.51766800 | -0.00406500 | -2.19586500 | C | -3.34332900 | 0.53893300  | 2.37992000  |
| H           | 0.35625500  | 0.99043900  | -1.01635000 | H | -3.58225700 | -0.45350700 | 1.98500100  |
| C           | 0.76599600  | -1.15085600 | -0.79239200 | H | -2.36210700 | 0.48427600  | 2.86664100  |
| H           | 0.14164100  | -2.05064800 | -0.70006700 | H | -4.07666700 | 0.77384100  | 3.15245400  |
| H           | 1.37057800  | -1.33951500 | -1.68650900 | H | -1.03585900 | -0.14793400 | 1.21162500  |
| P           | -1.58430700 | 0.00771400  | -0.05467200 | H | 1.91909200  | -2.07913100 | 1.01880200  |
| B           | 1.79584200  | -0.97895300 | 0.50995500  | C | 4.44428700  | -0.99658300 | 0.59368800  |
| C           | -2.59645200 | 1.50964900  | 0.12112300  | C | 3.28445100  | -0.51007000 | -0.00628300 |
| C           | -3.35976100 | 1.60182700  | 1.30799500  | C | 3.51659800  | 0.43224500  | -0.99854200 |
| C           | -2.61870200 | 2.55798300  | -0.82258500 | C | 4.77595300  | 0.86117300  | -1.39990800 |
| C           | -4.14462700 | 2.73313900  | 1.51504700  | C | 5.89532200  | 0.33320500  | -0.77768300 |
| C           | -3.42470700 | 3.66574300  | -0.56260700 | C | 5.72671300  | -0.60350300 | 0.23201900  |
| C           | -4.19167500 | 3.77634400  | 0.59451300  | F | 4.36698500  | -1.88782000 | 1.59365100  |
| H           | -4.73349400 | 2.79944000  | 2.42624500  | F | 6.80105800  | -1.11251700 | 0.84350700  |
| H           | -3.44786600 | 4.47216700  | -1.29131300 | F | 7.11970800  | 0.72380400  | -1.14114500 |
| C           | -2.57729000 | -1.49602500 | -0.27610600 | F | 4.91777100  | 1.77372600  | -2.36866400 |
| C           | -3.51300700 | -1.59168800 | -1.32693900 | F | 2.47417600  | 1.00950600  | -1.64761300 |
|             |             |             |             | C | 1.32325400  | 0.08678500  | 1.70335400  |

|              |             |             |             |   |             |             |             |
|--------------|-------------|-------------|-------------|---|-------------|-------------|-------------|
| H            | 0.98688900  | 1.06160800  | 1.30585400  | F | 6.12504200  | 0.99267200  | 0.88655300  |
| H            | 0.47894500  | -0.34096300 | 2.27212500  | F | 3.51391800  | 1.22222400  | 0.98370800  |
| C            | 3.02810500  | 1.49932800  | 2.90851400  | F | 1.94819100  | 1.77394100  | -1.74609100 |
| H            | 2.72952300  | 2.39981200  | 2.37621000  | F | 0.94170800  | 4.18173300  | -1.26286600 |
| C            | 2.41842800  | 0.33558000  | 2.69122900  | F | -0.52225900 | 4.64616300  | 0.99487700  |
| H            | 2.76987600  | -0.54788600 | 3.22611200  | F | -0.94663000 | 2.60556000  | 2.74990000  |
| H            | 3.85264200  | 1.59194000  | 3.60795000  | F | 0.00318900  | 0.19418500  | 2.28087100  |
| <b>P5_TS</b> |             |             |             | H | -1.03361500 | -1.17013600 | -2.83031400 |
| P            | -1.57305800 | -0.75528100 | -0.40544400 | H | -0.71159500 | -2.46190700 | -1.69410700 |
| B            | 1.49441000  | -0.65719800 | -0.28805000 | H | 1.09575700  | -0.15098300 | -2.42258200 |
| C            | -0.60409900 | -1.38022700 | -1.85277600 | H | 1.44623200  | -1.83489700 | -2.21421900 |
| C            | 0.89503300  | -1.00294200 | -1.77183600 | H | -5.72978000 | -3.03342800 | -1.93640200 |
| C            | -2.99788600 | -1.90862700 | -0.24267800 | H | -4.26563600 | -4.22600600 | 1.89728100  |
| C            | -4.99429100 | -2.94927500 | -1.13923600 | H | -3.86954800 | 3.11039700  | 1.57091700  |
| C            | -5.11782600 | -3.76467500 | -0.01215600 | H | -6.25169700 | -5.25080800 | 1.06585600  |
| C            | -4.18079700 | -3.61805600 | 0.99883200  | H | -7.20978900 | -4.27656300 | -0.06077500 |
| C            | -3.12486100 | -2.70232900 | 0.91351400  | H | -6.14147000 | -5.53628700 | -0.67670600 |
| C            | -2.25370700 | 0.95919900  | -0.51845600 | H | -1.48520200 | -1.83414400 | 2.09988400  |
| C            | -2.05607700 | 1.83860700  | -1.60714100 | H | -1.67963700 | -3.58773700 | 2.23693800  |
| C            | -2.51211200 | 3.15495200  | -1.51004100 | H | -2.82098000 | -2.50709900 | 3.02592300  |
| C            | -3.15798100 | 3.64355000  | -0.37952300 | H | -1.90379700 | 0.66378400  | -3.42148900 |
| C            | -3.36992400 | 2.75868600  | 0.67175700  | H | -1.32893600 | 2.32345900  | -3.56057500 |
| C            | -2.93085500 | 1.43557900  | 0.63096200  | H | -0.34131300 | 1.12930700  | -2.73077000 |
| C            | 3.13071800  | -0.79193000 | -0.24136000 | H | -4.35891100 | 5.23028500  | 0.45195700  |
| C            | 3.80053400  | -1.88064200 | -0.80763800 | H | -3.90163700 | 5.47477500  | -1.24435200 |
| C            | 5.18012700  | -2.02556200 | -0.84177300 | H | -2.70296100 | 5.69013900  | 0.03702600  |
| C            | 5.98019700  | -1.04318700 | -0.27975100 | H | -3.62675100 | 1.20497100  | 2.64241300  |
| C            | 5.37547700  | 0.04969600  | 0.31785500  | H | -3.84070900 | -0.24576800 | 1.65285700  |
| C            | 3.98773800  | 0.14940100  | 0.33434400  | H | -2.23727500 | 0.19671400  | 2.26223200  |
| C            | 0.99977500  | 0.82913700  | 0.21409500  | C | -3.96214000 | -2.02868200 | -1.27498700 |
| C            | 1.22662800  | 1.92412700  | -0.62027000 | C | -3.92510300 | -1.18907900 | -2.52849000 |
| C            | 0.74122000  | 3.20156500  | -0.38226500 | H | -3.84854900 | -0.12271500 | -2.29876800 |
| C            | 0.00545200  | 3.44448500  | 0.76739200  | H | -3.07858400 | -1.46040700 | -3.16583100 |
| C            | -0.19947700 | 2.40872700  | 1.66213400  | H | -4.83494300 | -1.34408000 | -3.11130100 |
| C            | 0.30980400  | 1.14864000  | 1.37854000  | H | -2.33589500 | 3.82529300  | -2.34808100 |
| C            | -6.24122200 | -4.76173200 | 0.08981300  | H | -0.10605400 | -1.22956600 | 0.46519500  |
| C            | -2.21728600 | -2.64006000 | 2.12273300  | C | 1.00495900  | -2.06039600 | 0.84131500  |
| C            | -1.36841100 | 1.45906800  | -2.89565700 | H | 1.59820000  | -2.70009300 | 0.18092400  |
| C            | -3.56096200 | 5.08947300  | -0.28028300 | C | 1.31555600  | -2.66899000 | 3.25145400  |
| C            | -3.17224600 | 0.59471100  | 1.86037700  | H | 0.56155700  | -3.45020300 | 3.19139800  |
| F            | 3.11243500  | -2.90931100 | -1.34220800 | C | 1.63058000  | -1.92069800 | 2.19788100  |
| F            | 5.73620900  | -3.09912400 | -1.40207400 | H | 2.39258800  | -1.15024900 | 2.30542300  |
| F            | 7.30420800  | -1.15856800 | -0.29937100 | H | 1.80419700  | -2.53223600 | 4.20997800  |
|              |             |             |             | H | 0.10726700  | -2.68897100 | 0.95221600  |



**P5\_P**

|   |             |             |             |
|---|-------------|-------------|-------------|
| P | -1.80885200 | -0.79427000 | -0.28219200 |
| B | 1.62797800  | -0.88338100 | 0.12060800  |
| C | -0.57310700 | -1.74586400 | -1.23991400 |
| C | 0.88298000  | -1.27127900 | -1.31337000 |
| C | -3.32573000 | -1.79694000 | -0.27790600 |
| C | -5.40065100 | -2.48263000 | -1.29090700 |
| C | -5.64480200 | -3.37593800 | -0.25239000 |
| C | -4.70208000 | -3.47360500 | 0.77088200  |
| C | -3.54002000 | -2.70674500 | 0.78226400  |
| C | -2.20245100 | 0.95756100  | -0.55173300 |
| C | -1.83448900 | 1.69921700  | -1.68572700 |
| C | -2.19782500 | 3.04775900  | -1.74648400 |
| C | -2.89658000 | 3.67587300  | -0.72381300 |
| C | -3.25748700 | 2.91539600  | 0.39032100  |
| C | -2.92520100 | 1.57108300  | 0.50564900  |
| C | 3.26107200  | -0.86576100 | -0.16090000 |
| C | 3.89196200  | -1.99175200 | -0.69371100 |
| C | 5.25445900  | -2.08882500 | -0.94433900 |
| C | 6.07953600  | -1.01785800 | -0.63987700 |
| C | 5.51577800  | 0.11964800  | -0.08713800 |
| C | 4.14505000  | 0.16787400  | 0.14541200  |
| C | 1.07045800  | 0.63033600  | 0.52677400  |
| C | 1.27501200  | 1.68630100  | -0.36632800 |
| C | 0.75539800  | 2.96134000  | -0.22029400 |
| C | -0.00665700 | 3.25682700  | 0.90024700  |
| C | -0.21982000 | 2.26596400  | 1.83951100  |
| C | 0.30661200  | 0.99292600  | 1.63166400  |
| C | -6.87627000 | -4.24159400 | -0.24024400 |
| C | -2.56647700 | -2.88959200 | 1.92327100  |
| C | -1.03010200 | 1.16862700  | -2.84495800 |
| C | -3.20197700 | 5.14668500  | -0.77932700 |
| C | -3.30403100 | 0.84913700  | 1.77760200  |
| F | 3.18299100  | -3.10125700 | -0.99298100 |
| F | 5.77491000  | -3.20248000 | -1.46625400 |
| F | 7.39118000  | -1.08653600 | -0.86711700 |
| F | 6.29362800  | 1.15726800  | 0.22984200  |
| F | 3.71531100  | 1.30802600  | 0.71241100  |
| F | 2.01143700  | 1.49329800  | -1.47684500 |
| F | 0.92853700  | 3.88592400  | -1.16824900 |
| F | -0.56421800 | 4.46096800  | 1.04471100  |
| F | -1.01154200 | 2.51269500  | 2.88966000  |
| F | -0.07542300 | 0.08019100  | 2.55532200  |

|   |             |             |             |
|---|-------------|-------------|-------------|
| H | -1.03101000 | -1.94560300 | -2.21685800 |
| H | -0.62647700 | -2.69593800 | -0.68655500 |
| H | 0.96543900  | -0.44845300 | -2.02735900 |
| H | 1.40850300  | -2.11499900 | -1.77023300 |
| H | -6.12042600 | -2.39935000 | -2.10131300 |
| H | -4.87331600 | -4.17336900 | 1.58522000  |
| H | -3.79302000 | 3.39179300  | 1.20731800  |
| H | -7.32205600 | -4.27560500 | 0.75706500  |
| H | -7.62751400 | -3.87428800 | -0.94189100 |
| H | -6.62541400 | -5.26900800 | -0.52233100 |
| H | -2.44400100 | -1.97478400 | 2.51474000  |
| H | -1.57183100 | -3.18829400 | 1.57623400  |
| H | -2.92343700 | -3.66920300 | 2.59757800  |
| H | -1.44767300 | 1.53610100  | -3.78594500 |
| H | 0.00128200  | 1.53079500  | -2.77445200 |
| H | -0.99131500 | 0.08240300  | -2.89622900 |
| H | -4.15524400 | 5.37371500  | -0.29647000 |
| H | -3.23514200 | 5.50959600  | -1.80853800 |
| H | -2.41719900 | 5.69615800  | -0.25056100 |
| H | -3.88457500 | 1.51255700  | 2.41952100  |
| H | -3.90737700 | -0.04356900 | 1.58418400  |
| H | -2.41556700 | 0.55210500  | 2.34548800  |
| C | -4.25489900 | -1.68769300 | -1.32906200 |
| C | -4.07533100 | -0.74423500 | -2.49320900 |
| H | -4.29218900 | 0.28957700  | -2.20783100 |
| H | -3.05704100 | -0.76532200 | -2.89309300 |
| H | -4.74875100 | -1.02195100 | -3.30587900 |
| H | -1.89726800 | 3.62311400  | -2.61886900 |
| H | -1.36046000 | -0.83516700 | 1.03414100  |
| C | 1.34203600  | -2.04496600 | 1.25665000  |
| H | 1.55488000  | -3.00354900 | 0.75896400  |
| C | 1.77088600  | -1.87821200 | 3.74296600  |
| H | 0.71008000  | -1.86573700 | 3.98162600  |
| C | 2.19690900  | -1.96172400 | 2.48441400  |
| H | 3.27312400  | -1.96269500 | 2.30381600  |
| H | 2.46292600  | -1.81043900 | 4.57614200  |
| H | 0.29070100  | -2.08654000 | 1.57174300  |

**P6\_TS**

|   |            |             |            |
|---|------------|-------------|------------|
| P | 1.88395100 | -0.62343900 | 0.30566900 |
| C | 1.37914700 | -1.00091200 | 2.03646900 |
| H | 2.25658200 | -1.17647600 | 2.66295500 |
| H | 0.80530200 | -0.17565400 | 2.45874100 |
| C | 0.47443000 | -2.23415300 | 1.94583100 |

|   |             |             |             |             |             |             |             |
|---|-------------|-------------|-------------|-------------|-------------|-------------|-------------|
| H | 0.88528700  | -2.94083000 | 1.20721200  | H           | 1.47710400  | -3.37012600 | -1.02373600 |
| H | 0.51234500  | -2.76735400 | 2.90227900  | H           | 2.60339800  | -3.98455900 | -2.22803600 |
| C | -0.98181200 | -1.87724700 | 1.62758800  | C           | -1.02642100 | 0.63541000  | 0.30253900  |
| H | -1.40399600 | -1.40553000 | 2.51926600  | C           | -0.70148200 | 1.36509100  | -0.84365100 |
| H | -1.51824000 | -2.82562300 | 1.53416700  | F           | -0.39278300 | 0.73726300  | -1.99296100 |
| B | -1.40176600 | -0.97675200 | 0.33067400  | C           | -0.61374300 | 2.74783500  | -0.89523700 |
| C | 2.27315800  | 1.15136200  | 0.00564500  | F           | -0.29783900 | 3.37213600  | -2.03167600 |
| C | 2.22102300  | 2.18518400  | 0.96742200  | C           | -0.80267600 | 3.48516200  | 0.26182500  |
| C | 2.05171700  | 2.00316600  | 2.46116800  | F           | -0.63466100 | 4.80618000  | 0.25132200  |
| H | 2.45801600  | 2.87769900  | 2.97396700  | C           | -1.10077800 | 2.81897400  | 1.43770000  |
| H | 2.57280300  | 1.12777600  | 2.84279900  | F           | -1.21532700 | 3.49736100  | 2.58167100  |
| H | 1.00025400  | 1.92291300  | 2.75599800  | C           | -1.21314000 | 1.43319600  | 1.42907400  |
| C | 2.33991200  | 3.50891500  | 0.53102900  | F           | -1.48033300 | 0.87533200  | 2.62418100  |
| H | 2.27041700  | 4.30282400  | 1.27195100  | C           | -3.05009100 | -1.02217000 | 0.10521000  |
| C | 2.49893900  | 3.85037900  | -0.80631400 | C           | -3.97480100 | -1.61531000 | 0.97011400  |
| C | 2.47360000  | 5.28616700  | -1.25177000 | F           | -3.60808400 | -2.23036100 | 2.10297000  |
| H | 3.09608100  | 5.44323300  | -2.13577200 | C           | -5.35113900 | -1.62120800 | 0.75530000  |
| H | 2.81360900  | 5.95768700  | -0.46026100 | F           | -6.16061300 | -2.21813400 | 1.63017400  |
| H | 1.44640600  | 5.56401400  | -1.50969900 | C           | -5.88295300 | -1.00770000 | -0.36425400 |
| C | 2.61705000  | 2.81346300  | -1.72864200 | F           | -7.19495200 | -1.00809000 | -0.58287000 |
| H | 2.76717200  | 3.04977000  | -2.77918600 | C           | -5.01850300 | -0.38915600 | -1.25304500 |
| C | 2.50671000  | 1.47896900  | -1.35277000 | F           | -5.49835100 | 0.21674400  | -2.33928700 |
| C | 2.62537300  | 0.42756900  | -2.42931300 | C           | -3.65516700 | -0.40327200 | -0.99465100 |
| H | 1.70864600  | -0.16655500 | -2.49597900 | F           | -2.90594200 | 0.22809700  | -1.91918700 |
| H | 3.46382900  | -0.25160400 | -2.24484000 | H           | 0.34509400  | -1.22524900 | -0.49662600 |
| H | 2.77729700  | 0.89886700  | -3.40167900 | C           | -0.79015100 | -1.83318400 | -1.19111700 |
| C | 3.46512400  | -1.57933600 | 0.09772900  | H           | 0.12101500  | -1.79285300 | -1.80996100 |
| C | 4.63461400  | -1.23761800 | 0.81843200  | C           | -2.25405600 | -3.83830400 | -1.48050300 |
| C | 4.72664400  | -0.08894300 | 1.79183700  | H           | -2.97639800 | -3.26292700 | -2.05466700 |
| H | 5.75911500  | 0.03529400  | 2.12285900  | C           | -1.14435500 | -3.27755200 | -1.00702900 |
| H | 4.12384100  | -0.26939700 | 2.68653000  | H           | -0.46545200 | -3.88912500 | -0.41326400 |
| H | 4.39905100  | 0.85333200  | 1.34933000  | H           | -2.48176100 | -4.88397300 | -1.30329300 |
| C | 5.79367500  | -1.99385000 | 0.63820900  | H           | -1.47689200 | -1.32553400 | -1.86672800 |
| H | 6.68479300  | -1.71544700 | 1.19566500  |             |             |             |             |
| C | 5.85024000  | -3.08172100 | -0.22547100 | <b>P6_P</b> |             |             |             |
| C | 7.10539300  | -3.89943000 | -0.37107900 | P           | 2.06305100  | -0.56770800 | 0.48220900  |
| H | 7.08672200  | -4.75682600 | 0.30961400  | C           | 1.17555000  | -1.11373200 | 1.97410000  |
| H | 7.99302900  | -3.30850300 | -0.13489100 | H           | 1.93432100  | -1.29909900 | 2.73964000  |
| H | 7.20882800  | -4.28810200 | -1.38685400 | H           | 0.53431300  | -0.30066700 | 2.31656900  |
| C | 4.69771000  | -3.39981600 | -0.93519800 | C           | 0.30923800  | -2.36574800 | 1.69985100  |
| H | 4.71443600  | -4.23897300 | -1.62640100 | H           | 0.65089200  | -2.89695300 | 0.80065200  |
| C | 3.51515200  | -2.67426900 | -0.79341200 | H           | 0.48729600  | -3.05868500 | 2.52901400  |
| C | 2.34219000  | -3.10691400 | -1.63454400 | C           | -1.18199100 | -2.01772100 | 1.59903000  |
| H | 2.03861700  | -2.31824600 | -2.32964700 | H           | -1.45240400 | -1.46706300 | 2.50647700  |

|   |             |             |             |              |             |             |             |
|---|-------------|-------------|-------------|--------------|-------------|-------------|-------------|
| H | -1.72434200 | -2.96727800 | 1.66946900  | F            | -0.49621000 | -0.03871900 | -2.30454200 |
| B | -1.70943900 | -1.30223300 | 0.20871800  | C            | -0.33452600 | 2.09940700  | -1.46897700 |
| C | 2.37709900  | 1.21110000  | 0.30848300  | F            | 0.12993300  | 2.48992200  | -2.66055000 |
| C | 2.28550900  | 2.13867600  | 1.36956500  | C            | -0.41696100 | 3.01087400  | -0.42993000 |
| C | 1.91300900  | 1.80741600  | 2.79579800  | F            | -0.07125000 | 4.28775900  | -0.61013000 |
| H | 2.25905800  | 2.60657600  | 3.45362900  | C            | -0.80368600 | 2.55578200  | 0.81934400  |
| H | 2.34933900  | 0.87593400  | 3.15521300  | F            | -0.79672300 | 3.39363400  | 1.86242900  |
| H | 0.82514000  | 1.74588900  | 2.91101700  | C            | -1.12949900 | 1.21501000  | 0.98915000  |
| C | 2.50475900  | 3.48716800  | 1.08678900  | F            | -1.47292700 | 0.87122400  | 2.24860200  |
| H | 2.42119000  | 4.20379100  | 1.89965800  | C            | -3.35107100 | -1.05155200 | 0.25737000  |
| C | 2.79491200  | 3.94707800  | -0.19383300 | C            | -4.22793200 | -1.45614500 | 1.26211200  |
| C | 2.94633000  | 5.41561100  | -0.47395500 | F            | -3.79902300 | -2.12252700 | 2.34808600  |
| H | 3.68340500  | 5.59685400  | -1.25943600 | C            | -5.60038500 | -1.22009200 | 1.23961700  |
| H | 3.24552700  | 5.96457200  | 0.42112900  | F            | -6.37677400 | -1.64470700 | 2.24054600  |
| H | 1.98663500  | 5.81817800  | -0.81241800 | C            | -6.16466400 | -0.53938100 | 0.17510700  |
| C | 2.88165800  | 3.01263300  | -1.22247100 | F            | -7.47684000 | -0.30606600 | 0.13554200  |
| H | 3.09304900  | 3.34985900  | -2.23356900 | C            | -5.34118900 | -0.10633500 | -0.85318700 |
| C | 2.67934600  | 1.65388500  | -1.00214200 | F            | -5.86339700 | 0.55228800  | -1.89076500 |
| C | 2.73256700  | 0.72781600  | -2.19211300 | C            | -3.97975000 | -0.36645700 | -0.78671900 |
| H | 1.74005600  | 0.32290300  | -2.42260700 | F            | -3.25727300 | 0.08588500  | -1.82599400 |
| H | 3.42598800  | -0.10500700 | -2.03779400 | H            | 1.23673200  | -0.90750100 | -0.59007900 |
| H | 3.06441800  | 1.27623000  | -3.07440400 | C            | -1.31809500 | -2.36357400 | -1.01437900 |
| C | 3.56172300  | -1.56862500 | 0.23857700  | H            | -1.35380100 | -3.35619900 | -0.53426300 |
| C | 4.69441000  | -1.33966000 | 1.04985600  | C            | -1.72317200 | -2.43131300 | -3.50464200 |
| C | 4.72053900  | -0.31142000 | 2.15305900  | H            | -0.67026600 | -2.27227400 | -3.72906700 |
| H | 5.70619600  | -0.28472300 | 2.61993400  | C            | -2.16021700 | -2.47085900 | -2.24841900 |
| H | 3.99915800  | -0.55034600 | 2.94131500  | H            | -3.22683300 | -2.62798300 | -2.07796800 |
| H | 4.49597300  | 0.69326200  | 1.78445700  | H            | -2.39590400 | -2.53274100 | -4.34996200 |
| C | 5.84088300  | -2.09875500 | 0.83237200  | H            | -0.27563500 | -2.23207700 | -1.33498900 |
| H | 6.71347600  | -1.91617700 | 1.45447500  |              |             |             |             |
| C | 5.90124900  | -3.07669300 | -0.15731800 | <b>P7_TS</b> |             |             |             |
| C | 7.14394900  | -3.90163200 | -0.35501900 | P            | -1.82908400 | -0.41736900 | -0.12814100 |
| H | 7.11247200  | -4.79589900 | 0.27572100  | B            | 1.37362000  | -0.07765100 | 0.17046000  |
| H | 8.04006000  | -3.33816600 | -0.08632700 | C            | -0.77608500 | -1.11023100 | -2.94408100 |
| H | 7.23889000  | -4.23149700 | -1.39174500 | H            | -1.46425100 | -1.88285000 | -3.29513500 |
| C | 4.77141400  | -3.28656900 | -0.94275200 | C            | -0.64937900 | -0.99791400 | -1.41147100 |
| H | 4.80290100  | -4.04456600 | -1.72117700 | H            | -0.32333200 | -1.96653200 | -1.02943100 |
| C | 3.59409500  | -2.55861600 | -0.77094200 | C            | 0.52389600  | 0.01844900  | -1.24482400 |
| C | 2.43087000  | -2.89031200 | -1.67696700 | H            | 0.05472200  | 1.01191800  | -1.20619600 |
| H | 2.06080000  | -2.02213200 | -2.23162700 | C            | 1.20462000  | -0.04449400 | -2.65275300 |
| H | 1.58426700  | -3.30678600 | -1.12402700 | H            | 2.28372100  | 0.11302400  | -2.64475200 |
| H | 2.73731900  | -3.63678200 | -2.41099800 | C            | 0.41739500  | 0.94310100  | -3.53351100 |
| C | -1.09598400 | 0.25163300  | -0.01896900 | H            | 0.86203100  | 1.01476000  | -4.53115400 |
| C | -0.66397000 | 0.76861700  | -1.24105500 | H            | 0.39177500  | 1.94947400  | -3.10526200 |

|   |             |             |             |             |             |             |             |
|---|-------------|-------------|-------------|-------------|-------------|-------------|-------------|
| C | -0.99384900 | 0.27649500  | -3.59901200 | H           | -1.12552900 | -3.88375800 | -0.71269300 |
| H | -1.75739300 | 0.86529200  | -3.08403800 | H           | -2.29043400 | -3.02872300 | -1.72412200 |
| H | -1.32522800 | 0.15247600  | -4.63354300 | C           | 2.77727400  | -0.90781500 | -0.03238500 |
| C | 0.71173200  | -1.37078600 | -3.26397700 | F           | 4.23024200  | 0.78516400  | 0.81331400  |
| H | 0.90501400  | -1.42139000 | -4.34054700 | C           | 4.05482100  | -0.40448200 | 0.22583000  |
| H | 1.09932900  | -2.27201500 | -2.78939600 | F           | 6.41291300  | -0.53840900 | 0.20940500  |
| C | -3.04531600 | 0.78968200  | -0.80685700 | C           | 5.23146600  | -1.09153000 | -0.05734400 |
| C | -4.11528000 | 0.35548600  | -1.62480300 | F           | 6.28951800  | -3.03782500 | -0.86738000 |
| C | -5.02537300 | 1.29313000  | -2.10661700 | C           | 5.17502000  | -2.36558200 | -0.59786600 |
| H | -5.84162300 | 0.95032800  | -2.73819700 | F           | 3.84393500  | -4.16980300 | -1.32511400 |
| C | -4.91740500 | 2.65110300  | -1.81338100 | C           | 3.93349000  | -2.93471900 | -0.83320300 |
| C | -3.85486700 | 3.06177700  | -1.01741600 | F           | 1.63017500  | -2.86905100 | -0.75766900 |
| H | -3.74438300 | 4.11733000  | -0.78213000 | C           | 2.78924400  | -2.20704700 | -0.53992000 |
| C | -2.91646300 | 2.16230600  | -0.50619600 | C           | 1.53280000  | 1.44718200  | 0.73892300  |
| C | -4.29983300 | -1.08056300 | -2.03931200 | F           | 2.89600400  | 1.91989200  | -1.13053000 |
| H | -5.13962900 | -1.16974100 | -2.73055500 | C           | 2.25918100  | 2.35691400  | -0.03175200 |
| H | -4.48963300 | -1.73422800 | -1.18400900 | F           | 3.09642400  | 4.51248400  | -0.52881200 |
| H | -3.40775600 | -1.44979500 | -2.55199600 | C           | 2.37308800  | 3.70838000  | 0.24880300  |
| C | -5.93451800 | 3.63407200  | -2.32875500 | F           | 1.78913400  | 5.52463600  | 1.63959300  |
| H | -5.54548000 | 4.65411300  | -2.30934600 | C           | 1.71047400  | 4.22734000  | 1.35489000  |
| H | -6.83981400 | 3.60956300  | -1.71365200 | F           | 0.24947000  | 3.86265400  | 3.16498200  |
| H | -6.22805500 | 3.39593200  | -3.35412900 | C           | 0.94886900  | 3.37857700  | 2.13733200  |
| C | -1.79743000 | 2.72351400  | 0.33173100  | F           | 0.00538300  | 1.32389400  | 2.57432800  |
| H | -2.01136800 | 3.75817500  | 0.60846800  | C           | 0.87193400  | 2.02618500  | 1.81472600  |
| H | -0.84890600 | 2.71941800  | -0.21639900 | H           | -0.32460800 | -0.31750500 | 0.86328900  |
| H | -1.64634400 | 2.15197400  | 1.24893800  | C           | 0.60939500  | -1.14647900 | 1.56468000  |
| C | -2.75471200 | -1.74205600 | 0.74794400  | H           | -0.35480900 | -1.17491500 | 2.09761600  |
| C | -3.34062300 | -1.32677600 | 1.97104700  | H           | 0.66545200  | -2.11818800 | 1.06748400  |
| C | -4.00798100 | -2.25664900 | 2.76381100  | C           | 1.31291800  | -0.83071600 | 3.95250400  |
| H | -4.45792200 | -1.92183800 | 3.69558000  | H           | 0.28376200  | -0.71487900 | 4.28196900  |
| C | -4.10386700 | -3.59874000 | 2.40399600  | C           | 1.62262900  | -1.02291500 | 2.67322000  |
| C | -3.49854100 | -3.99586600 | 1.21757000  | H           | 2.66791200  | -1.12376800 | 2.39641800  |
| H | -3.54970100 | -5.04149600 | 0.92308800  | H           | 2.08438900  | -0.77075300 | 4.71253600  |
| C | -2.82203400 | -3.10316800 | 0.38176700  |             |             |             |             |
| C | -3.24760600 | 0.09583900  | 2.47024300  | <b>P7_P</b> |             |             |             |
| H | -3.72761500 | 0.80344300  | 1.78674500  | P           | -2.00443900 | -0.47579100 | -0.21951300 |
| H | -2.20382100 | 0.41006800  | 2.58718500  | B           | 1.50209000  | -0.09268600 | 0.25748100  |
| H | -3.73423300 | 0.18672900  | 3.44283100  | C           | -0.78796400 | -0.87277500 | -2.89463000 |
| C | -4.85155100 | -4.57851900 | 3.26886500  | H           | -1.44046900 | -1.65148600 | -3.29970900 |
| H | -4.58516400 | -5.60854800 | 3.02310800  | C           | -0.62779600 | -0.89288300 | -1.35645400 |
| H | -5.93218300 | -4.46997600 | 3.13139500  | H           | -0.30498800 | -1.88413000 | -1.03084000 |
| H | -4.63773800 | -4.41128900 | 4.32757500  | C           | 0.52347400  | 0.13295000  | -1.09918400 |
| C | -2.19313000 | -3.68553600 | -0.86087300 | H           | 0.03059600  | 1.09562400  | -0.91092800 |
| H | -2.66817300 | -4.63746900 | -1.10625400 | C           | 1.12801000  | 0.27844500  | -2.53367000 |

|   |             |             |             |              |             |             |             |
|---|-------------|-------------|-------------|--------------|-------------|-------------|-------------|
| H | 2.19518900  | 0.50232500  | -2.53344900 | H            | -4.40408300 | -5.86637700 | 2.82200000  |
| C | 0.25884200  | 1.30413800  | -3.28253700 | H            | -5.05194300 | -4.62930100 | 3.91464100  |
| H | 0.67638300  | 1.52998000  | -4.26879500 | C            | -2.05154400 | -3.69147900 | -0.96796200 |
| H | 0.16778500  | 2.24756600  | -2.73573600 | H            | -2.53543800 | -4.62577600 | -1.25961400 |
| C | -1.10272900 | 0.55141500  | -3.41621500 | H            | -0.97949300 | -3.89469300 | -0.86748100 |
| H | -1.90853000 | 1.04359000  | -2.86689800 | H            | -2.17927500 | -2.98282900 | -1.78495300 |
| H | -1.42215800 | 0.49253800  | -4.46043700 | C            | 2.96101500  | -0.76972800 | -0.13038000 |
| C | 0.70102800  | -1.00374600 | -3.27362500 | F            | 4.36738900  | 0.81365600  | 0.96168600  |
| H | 0.85164900  | -0.92563300 | -4.35527700 | C            | 4.22396900  | -0.30368200 | 0.23515500  |
| H | 1.15944300  | -1.92106200 | -2.91178800 | F            | 6.58624400  | -0.43902900 | 0.29105200  |
| C | -3.32121700 | 0.62637300  | -0.82421100 | C            | 5.41302000  | -0.95490000 | -0.07874500 |
| C | -4.37182100 | 0.11632000  | -1.61409400 | F            | 6.51027900  | -2.79930500 | -1.06513500 |
| C | -5.38658700 | 0.97731500  | -2.02177200 | C            | 5.38090100  | -2.16107900 | -0.76045600 |
| H | -6.19313200 | 0.58264200  | -2.63438500 | F            | 4.08530400  | -3.88000000 | -1.72651500 |
| C | -5.39000500 | 2.32625100  | -1.67395200 | C            | 4.15137500  | -2.70149400 | -1.10125300 |
| C | -4.33171500 | 2.81166400  | -0.90970400 | F            | 1.83968400  | -2.64952700 | -1.07011900 |
| H | -4.31044500 | 3.86608600  | -0.64753600 | C            | 2.99690500  | -2.00930800 | -0.76374600 |
| C | -3.28629600 | 1.99749600  | -0.47314100 | C            | 1.62332500  | 1.46827300  | 0.80553400  |
| C | -4.41470600 | -1.31949600 | -2.06739800 | F            | 3.15172600  | 2.04410700  | -0.91335900 |
| H | -5.29030800 | -1.49551000 | -2.69396500 | C            | 2.37568700  | 2.42202500  | 0.11706200  |
| H | -4.45719000 | -2.01509800 | -1.22429900 | F            | 3.11921100  | 4.62980700  | -0.30926900 |
| H | -3.53092700 | -1.56134800 | -2.66657600 | C            | 2.36123400  | 3.78251300  | 0.38845100  |
| C | -6.51469600 | 3.23138800  | -2.09855900 | F            | 1.46729800  | 5.57734600  | 1.64131800  |
| H | -6.17196400 | 4.26198700  | -2.21153100 | C            | 1.51926500  | 4.27133800  | 1.37912400  |
| H | -7.31181000 | 3.22697400  | -1.34812600 | F            | -0.16398800 | 3.82511300  | 2.97057800  |
| H | -6.94956400 | 2.90449100  | -3.04549700 | C            | 0.71435800  | 3.37985900  | 2.06534500  |
| C | -2.17356200 | 2.65202000  | 0.31463900  | F            | -0.12688700 | 1.26573300  | 2.42692900  |
| H | -2.38639900 | 3.71472000  | 0.44006800  | C            | 0.78450500  | 2.02291100  | 1.76431500  |
| H | -1.21036300 | 2.57353200  | -0.20033900 | H            | -1.38674800 | 0.31031500  | 0.74997800  |
| H | -2.04271000 | 2.22963700  | 1.31601900  | C            | 0.88679000  | -1.13258800 | 1.40191700  |
| C | -2.67249300 | -1.86039100 | 0.75585000  | H            | -0.13374900 | -0.92357500 | 1.73996000  |
| C | -3.20220700 | -1.52152800 | 2.02515900  | H            | 0.85791200  | -2.13543900 | 0.94991700  |
| C | -3.68761100 | -2.53815800 | 2.84110100  | C            | 1.36713300  | -0.91963900 | 3.87130200  |
| H | -4.09529900 | -2.27587100 | 3.81396400  | H            | 0.34584900  | -0.62242400 | 4.09628000  |
| C | -3.66018100 | -3.87591500 | 2.45143800  | C            | 1.74950600  | -1.19939000 | 2.62687600  |
| C | -3.13455800 | -4.18273900 | 1.20152700  | H            | 2.78976400  | -1.48274100 | 2.45912600  |
| H | -3.10712100 | -5.22036200 | 0.87835800  | H            | 2.06054000  | -0.96841700 | 4.70459300  |
| C | -2.62900500 | -3.20667600 | 0.34083500  |              |             |             |             |
| C | -3.23862900 | -0.10694700 | 2.55096200  | <b>P8_TS</b> |             |             |             |
| H | -3.73123300 | 0.58109700  | 1.85666100  | C            | -0.49023700 | -1.19362700 | -0.90409700 |
| H | -2.22807300 | 0.27049200  | 2.74697200  | H            | -0.65692300 | -0.65057600 | -1.83805700 |
| H | -3.78772800 | -0.07359300 | 3.49275700  | H            | 0.02819200  | -2.12068100 | -1.15301100 |
| C | -4.16128400 | -4.95527800 | 3.37233400  | P            | -2.04450700 | -1.56992100 | -0.00611700 |
| H | -3.39660200 | -5.20599400 | 4.11425300  | B            | 0.33714000  | -0.25385000 | 0.16496200  |

|   |             |             |             |             |             |             |             |
|---|-------------|-------------|-------------|-------------|-------------|-------------|-------------|
| C | -3.55963000 | -0.80910600 | -0.85071000 | F           | -0.53605000 | 4.01191100  | -2.17448500 |
| C | -3.20441600 | 0.55817100  | -1.45053100 | F           | -2.16852900 | 4.96528800  | -0.21012900 |
| H | -2.44360900 | 0.48568100  | -2.23275000 | F           | -2.63567800 | 3.44041200  | 2.00153200  |
| H | -4.11054200 | 0.97064700  | -1.90833500 | F           | -1.56935200 | 1.04658000  | 2.24729400  |
| H | -2.86458700 | 1.26765700  | -0.69612000 | H           | -0.97039800 | -0.97231400 | 1.27376900  |
| C | -4.62568500 | -0.59510400 | 0.23507800  | C           | 0.27462400  | -0.97610000 | 1.92740600  |
| H | -5.50948900 | -0.12688600 | -0.21276700 | H           | -0.52496400 | -1.29896700 | 2.61980800  |
| H | -4.94353100 | -1.53289500 | 0.69772000  | C           | 2.33663700  | -0.09174600 | 3.04176400  |
| H | -4.25061700 | 0.06531100  | 1.02295300  | H           | 2.92870500  | -0.93659300 | 2.69721300  |
| C | -4.11368500 | -1.67593400 | -1.98641600 | C           | 1.04880300  | 0.03204200  | 2.73517600  |
| H | -4.50040900 | -2.63452200 | -1.63662500 | H           | 0.49077900  | 0.88791400  | 3.10043700  |
| H | -4.94521700 | -1.14175600 | -2.46063700 | H           | 2.84330400  | 0.65394000  | 3.64495700  |
| H | -3.35629300 | -1.86149500 | -2.75428300 | H           | 0.84940900  | -1.88565200 | 1.73853700  |
| C | -2.17850500 | -3.45294100 | 0.06531500  |             |             |             |             |
| C | -1.01220500 | -3.92347200 | 0.95208800  | <b>P8_P</b> |             |             |             |
| H | -0.03780600 | -3.65936400 | 0.53121100  | C           | 0.46248500  | 1.22210100  | -0.63761100 |
| H | -1.08091600 | -3.51051000 | 1.96292900  | H           | 0.49019900  | 0.71576000  | -1.60714300 |
| H | -1.05255400 | -5.01517100 | 1.03527300  | H           | -0.01171000 | 2.19329300  | -0.78444700 |
| C | -3.48599900 | -3.86586800 | 0.75310100  | P           | 2.14223200  | 1.54305600  | -0.10247200 |
| H | -3.59926200 | -3.37677400 | 1.72642900  | B           | -0.41448200 | 0.26657600  | 0.45446900  |
| H | -4.36850500 | -3.64084100 | 0.15002600  | C           | 3.48232900  | 0.79943900  | -1.16433100 |
| H | -3.47267300 | -4.94832600 | 0.92356300  | C           | 3.01088300  | -0.57497000 | -1.66252500 |
| C | -2.04446900 | -4.14728700 | -1.29676800 | H           | 2.12148300  | -0.51524600 | -2.29503400 |
| H | -1.97326800 | -5.22914500 | -1.13377900 | H           | 3.81876300  | -1.00839700 | -2.26147200 |
| H | -2.89840700 | -3.96970000 | -1.95018400 | H           | 2.80424200  | -1.25849500 | -0.83591900 |
| H | -1.13754200 | -3.83569800 | -1.82307300 | C           | 4.74029300  | 0.58783300  | -0.30762500 |
| C | 1.94363100  | -0.28513600 | -0.08157700 | H           | 5.51012300  | 0.12051700  | -0.93035200 |
| C | 2.61051200  | -1.49438100 | -0.26947400 | H           | 5.15215200  | 1.51878800  | 0.08577200  |
| C | 2.78095300  | 0.83059000  | -0.07651400 | H           | 4.53748100  | -0.08585900 | 0.53094100  |
| C | 3.97952900  | -1.61224700 | -0.46827000 | C           | 3.78620200  | 1.69525900  | -2.37066700 |
| C | 4.15347600  | 0.76369700  | -0.28108400 | H           | 4.27448400  | 2.62784800  | -2.07740400 |
| C | 4.76005500  | -0.46677400 | -0.48123900 | H           | 4.46934000  | 1.15989100  | -3.03774800 |
| F | 1.93750600  | -2.66458500 | -0.21975700 | H           | 2.88290500  | 1.93355900  | -2.94180000 |
| F | 4.54295500  | -2.80807900 | -0.63907900 | C           | 2.33776900  | 3.36072900  | 0.25273300  |
| F | 4.89475700  | 1.87036400  | -0.26750000 | C           | 1.31265300  | 3.68597100  | 1.35357000  |
| F | 2.29791300  | 2.05522200  | 0.16082200  | H           | 0.28596800  | 3.48660400  | 1.03398900  |
| F | 6.07304100  | -0.54853300 | -0.67085400 | H           | 1.50175500  | 3.12216900  | 2.27120900  |
| C | -0.35216100 | 1.22523500  | 0.19631900  | H           | 1.39301700  | 4.75265900  | 1.58741800  |
| C | -1.21791600 | 1.74975100  | 1.15033700  | C           | 3.74735800  | 3.68388300  | 0.76036500  |
| C | -0.17242100 | 2.04058500  | -0.92031500 | H           | 4.03096100  | 3.05851400  | 1.61302400  |
| C | -1.82322700 | 2.99953600  | 1.04152600  | H           | 4.50258200  | 3.57685100  | -0.02275200 |
| C | -0.75849400 | 3.28560400  | -1.08141400 | H           | 3.76537200  | 4.72658400  | 1.09375700  |
| C | -1.59338400 | 3.77376200  | -0.08331900 | C           | 2.01227200  | 4.20966400  | -0.98576900 |
| F | 0.60836100  | 1.61133900  | -1.92301600 | H           | 2.01669800  | 5.26204700  | -0.68367100 |



|             |             |             |             |               |             |             |             |
|-------------|-------------|-------------|-------------|---------------|-------------|-------------|-------------|
| H           | 0.72199900  | 5.37357400  | -0.21356800 | C             | 1.70355500  | -1.78413900 | -1.73640500 |
| C           | 0.74910300  | -0.83259400 | 1.75820500  | H             | 1.20995500  | -2.38246100 | -0.96723600 |
| H           | -0.04727400 | -0.94868100 | 2.51318000  | H             | 0.93295200  | -1.27464400 | -2.31854000 |
| C           | 1.83221900  | 0.18227600  | 3.77819600  | H             | 2.24055500  | -2.46370500 | -2.40755500 |
| H           | 0.91833600  | 0.09632400  | 4.36240000  | H             | -3.67045800 | -0.73325400 | 0.31997700  |
| C           | 1.89479300  | -0.22283000 | 2.51057200  | H             | -5.77932600 | 0.10584700  | -0.62995600 |
| H           | 2.83136300  | -0.11565500 | 1.96850200  | H             | -5.79950500 | 2.18718900  | -1.99209000 |
| H           | 2.69112500  | 0.62258400  | 4.27313800  | H             | -3.67006800 | 3.41027400  | -2.37213600 |
| H           | 0.96751200  | -1.86208700 | 1.45551400  | H             | -1.58036700 | 2.58469800  | -1.41917500 |
| <b>P9_P</b> |             |             |             | H             | 1.69489300  | -0.36161200 | 1.17585000  |
| C           | 0.24576100  | 0.92144200  | -0.59865100 | C             | -0.99306700 | -1.33103300 | 0.22800800  |
| H           | 0.24780900  | 2.01394200  | -0.51789900 | C             | -0.37618500 | -2.08676500 | 1.23844100  |
| H           | 0.16462400  | 0.66737600  | -1.66160800 | C             | -1.46014800 | -2.05564200 | -0.88293700 |
| B           | -1.08446800 | 0.29629200  | 0.27280200  | C             | -0.19583600 | -3.46817200 | 1.13663200  |
| C           | -2.43576500 | 0.84841400  | -0.45674200 | H             | -0.04892900 | -1.58673200 | 2.14839800  |
| C           | -3.66113800 | 0.18368700  | -0.26653500 | C             | -1.30067500 | -3.43374100 | -0.99653300 |
| C           | -2.49005700 | 2.01788000  | -1.22866000 | H             | -1.96729300 | -1.51500500 | -1.68013900 |
| C           | -4.85625600 | 0.65204800  | -0.80437300 | C             | -0.65440600 | -4.14838000 | 0.01221500  |
| C           | -3.67807500 | 2.50055800  | -1.77763200 | H             | 0.28554300  | -4.01393000 | 1.94399100  |
| C           | -4.87074800 | 1.81789500  | -1.56747400 | H             | -1.67792700 | -3.95431800 | -1.87274200 |
| P           | 1.84678000  | 0.37454500  | -0.00975800 | H             | -0.52519700 | -5.22345600 | -0.07129100 |
| C           | 2.87669000  | 1.83225400  | 0.53009600  | C             | -1.00404200 | 0.91191200  | 1.80714000  |
| C           | 4.27527700  | 1.40326100  | 0.98754400  | H             | -0.05564900 | 0.67659600  | 2.31905700  |
| H           | 4.89793100  | 1.06387400  | 0.15617100  | C             | -2.01087900 | -0.21977300 | 3.82317400  |
| H           | 4.77294000  | 2.26776500  | 1.43945400  | H             | -1.03648800 | -0.50885400 | 4.21287400  |
| H           | 4.23397500  | 0.61277100  | 1.74384300  | C             | -2.12730500 | 0.47594400  | 2.69289400  |
| C           | 2.98599000  | 2.88083600  | -0.58610800 | H             | -3.12681600 | 0.74016900  | 2.34572100  |
| H           | 3.54338900  | 2.51775500  | -1.45143400 | H             | -2.87789200 | -0.52903200 | 4.39783500  |
| H           | 2.00479800  | 3.22088100  | -0.92583600 | H             | -1.04208800 | 2.00991600  | 1.71457000  |
| H           | 3.51917200  | 3.75087000  | -0.18840800 | <b>P10_TS</b> |             |             |             |
| C           | 2.13798100  | 2.45404600  | 1.72829800  | P             | 2.60477100  | -0.69484700 | 0.65673900  |
| H           | 1.11664700  | 2.75374600  | 1.48035700  | B             | -1.88459100 | -0.34248200 | 0.77685800  |
| H           | 2.08989400  | 1.76565800  | 2.57711300  | C             | 2.42521200  | -1.28477800 | 2.41234300  |
| H           | 2.68744800  | 3.34653700  | 2.04546100  | H             | 2.86661700  | -0.60511900 | 3.14187600  |
| C           | 2.73432900  | -0.81620200 | -1.13652000 | H             | 3.01638500  | -2.20720900 | 2.43391300  |
| C           | 3.73353800  | -1.65309300 | -0.32242000 | C             | 0.94893900  | -1.58291200 | 2.72350200  |
| H           | 4.18588900  | -2.39184900 | -0.99225700 | H             | 0.88423700  | -2.05945600 | 3.70805500  |
| H           | 4.54147900  | -1.06349200 | 0.11309900  | H             | 0.58703600  | -2.33859400 | 2.01421300  |
| H           | 3.22272800  | -2.20087900 | 0.47582800  | C             | 0.05164700  | -0.33393100 | 2.68800300  |
| C           | 3.44085600  | -0.05920600 | -2.26699500 | H             | 0.11284100  | 0.15987000  | 3.66464700  |
| H           | 4.28128000  | 0.53978600  | -1.90661800 | H             | 0.47469300  | 0.39061100  | 1.98429600  |
| H           | 3.83770800  | -0.78976600 | -2.97912100 | C             | -1.42171800 | -0.60666000 | 2.31853500  |
| H           | 2.75065700  | 0.59352800  | -2.81196000 | H             | -1.65070700 | -1.64977200 | 2.57766900  |



|   |             |             |             |              |             |             |             |
|---|-------------|-------------|-------------|--------------|-------------|-------------|-------------|
| H | -2.07695000 | -0.00194900 | 2.95666000  | C            | -1.44021800 | 3.57884600  | 0.41086500  |
| C | 2.55073900  | 1.11493000  | 0.36077500  | F            | -0.84858700 | 4.57086000  | 1.08434600  |
| C | 2.41496500  | 2.12507000  | 1.33850700  | C            | -2.00401200 | 3.82634400  | -0.82891500 |
| C | 2.04700000  | 3.41211100  | 0.93590000  | F            | -1.94957700 | 5.04856600  | -1.36296000 |
| H | 1.91982200  | 4.17518900  | 1.69915900  | C            | -2.61862000 | 2.78714500  | -1.51096400 |
| C | 1.84585500  | 3.75302300  | -0.39697800 | F            | -3.17659200 | 3.01460300  | -2.69988200 |
| C | 2.06027400  | 2.76384500  | -1.35543500 | C            | -2.63992900 | 1.51847700  | -0.94619600 |
| H | 1.95621500  | 3.01233500  | -2.40934000 | C            | -3.11003600 | -1.33966100 | 0.40283800  |
| C | 2.40885400  | 1.46023500  | -1.01039800 | C            | -4.43798400 | -0.91814900 | 0.36568300  |
| C | 2.69020600  | 1.92666600  | 2.80942100  | F            | -4.74562900 | 0.37025800  | 0.56568600  |
| H | 1.89024800  | 1.38095900  | 3.31417300  | C            | -5.51183500 | -1.76929100 | 0.13683700  |
| H | 3.62885400  | 1.39156000  | 2.97175000  | F            | -6.75856500 | -1.29915200 | 0.10853100  |
| H | 2.77804400  | 2.89851100  | 3.29806300  | C            | -5.28288900 | -3.12382600 | -0.05278500 |
| C | 1.43869300  | 5.14475600  | -0.80106200 | F            | -6.29803300 | -3.95623100 | -0.27190200 |
| H | 0.41253900  | 5.16240900  | -1.17911200 | C            | -3.98255600 | -3.60154900 | -0.00159000 |
| H | 1.48908300  | 5.83161400  | 0.04547800  | F            | -3.74120400 | -4.90333200 | -0.16598000 |
| H | 2.08882700  | 5.52285300  | -1.59489800 | C            | -2.94380200 | -2.71209600 | 0.23741100  |
| C | 2.66960500  | 0.47659400  | -2.12507300 | F            | -1.71181400 | -3.26554300 | 0.30688600  |
| H | 3.71588700  | 0.15598900  | -2.13323300 | F            | -3.26405500 | 0.57876900  | -1.66505100 |
| H | 2.04437400  | -0.41790400 | -2.04304200 | H            | 1.02797300  | -1.03547900 | -0.08148900 |
| H | 2.44276500  | 0.93326200  | -3.09027700 | C            | -0.35199600 | -0.83835700 | -0.31194600 |
| C | 4.14257300  | -1.43260300 | 0.00711700  | H            | -0.00971600 | 0.15993200  | -0.05677200 |
| C | 5.41794800  | -0.89229800 | 0.25990500  | H            | -0.35725800 | -1.66081500 | 0.39087900  |
| C | 6.53104200  | -1.49607000 | -0.32382500 | C            | -0.55391000 | -0.22197400 | -2.71205300 |
| H | 7.51647100  | -1.07940600 | -0.12904700 | H            | -0.15896000 | 0.77536000  | -2.52398400 |
| C | 6.41682000  | -2.62213200 | -1.13677300 | C            | -0.68950700 | -1.10410200 | -1.71866900 |
| C | 5.14834000  | -3.16004100 | -1.34621500 | H            | -1.10369200 | -2.08925100 | -1.92753900 |
| H | 5.04485900  | -4.05238000 | -1.95884000 | H            | -0.86154800 | -0.45300800 | -3.72513700 |
| C | 4.00445700  | -2.58709000 | -0.79223600 |              |             |             |             |
| C | 5.61968100  | 0.29493700  | 1.16655500  | <b>P10_P</b> |             |             |             |
| H | 6.68326500  | 0.50252800  | 1.29641700  | P            | -2.92012600 | -0.74910600 | -0.62220500 |
| H | 5.13792100  | 1.19534900  | 0.77458700  | B            | 1.83890500  | -0.59179800 | -0.47918600 |
| H | 5.19611500  | 0.09905700  | 2.15759400  | C            | -2.50989700 | -1.54563900 | -2.22905000 |
| C | 7.63103300  | -3.23493500 | -1.78315700 | H            | -2.78789000 | -0.89975000 | -3.06378400 |
| H | 8.52964700  | -3.05501500 | -1.18893600 | H            | -3.17485800 | -2.41680000 | -2.25392300 |
| H | 7.51047200  | -4.31322400 | -1.90934600 | C            | -1.02474900 | -1.93914600 | -2.27828100 |
| H | 7.79768100  | -2.80269200 | -2.77516800 | H            | -0.87492000 | -2.59978000 | -3.13935700 |
| C | 2.66383600  | -3.23293100 | -1.06204800 | H            | -0.77638800 | -2.53258200 | -1.38962100 |
| H | 2.79935200  | -4.16726100 | -1.60966300 | C            | -0.11025900 | -0.71860700 | -2.37051200 |
| H | 2.12669500  | -3.46532200 | -0.13626600 | H            | -0.20129700 | -0.31046500 | -3.38651700 |
| H | 2.00845800  | -2.58710900 | -1.65761100 | H            | -0.50515300 | 0.05793700  | -1.70738900 |
| C | -2.06016400 | 1.20307000  | 0.28657300  | C            | 1.35795800  | -0.99160900 | -2.00651100 |
| C | -1.48486400 | 2.29413600  | 0.93951900  | H            | 1.55016400  | -2.06553400 | -2.15120900 |
| F | -0.91474800 | 2.16563500  | 2.15155400  | H            | 2.01206600  | -0.48379900 | -2.72550200 |

|   |             |             |             |               |             |             |             |
|---|-------------|-------------|-------------|---------------|-------------|-------------|-------------|
| C | -2.56396300 | 0.99140100  | -0.28394100 | F             | 0.76719900  | 4.33235400  | -1.20455100 |
| C | -2.37237700 | 1.98290400  | -1.26647500 | C             | 2.15104500  | 3.76803700  | 0.61764300  |
| C | -1.97821800 | 3.25264300  | -0.84997300 | F             | 2.14509400  | 5.04083600  | 1.03422500  |
| H | -1.80603700 | 4.01388600  | -1.60476100 | C             | 2.84978100  | 2.79491900  | 1.31420300  |
| C | -1.77955400 | 3.57151100  | 0.49122800  | F             | 3.54895100  | 3.13212900  | 2.40057100  |
| C | -2.01397600 | 2.58004500  | 1.44369500  | C             | 2.79937400  | 1.47739000  | 0.87655900  |
| H | -1.88310200 | 2.81202600  | 2.49778300  | C             | 3.25142800  | -1.40667900 | -0.25573900 |
| C | -2.39979200 | 1.28976800  | 1.09179200  | C             | 4.45514700  | -0.92574700 | -0.76679000 |
| C | -2.53166900 | 1.76116600  | -2.74882200 | F             | 4.49266900  | 0.26601300  | -1.38734700 |
| H | -1.63028800 | 1.30241700  | -3.16381600 | C             | 5.66368300  | -1.60378600 | -0.68379400 |
| H | -3.39013200 | 1.13472900  | -3.00165200 | F             | 6.78130800  | -1.07855800 | -1.19405200 |
| H | -2.67242100 | 2.72050900  | -3.24927500 | C             | 5.70498800  | -2.84809000 | -0.07200000 |
| C | -1.32432400 | 4.94366400  | 0.90500400  | F             | 6.85407900  | -3.52126800 | 0.01624900  |
| H | -1.82141100 | 5.25753800  | 1.82611600  | C             | 4.53409100  | -3.38370300 | 0.43829800  |
| H | -0.24566500 | 4.95570300  | 1.08706500  | F             | 4.55039000  | -4.58703100 | 1.02110700  |
| H | -1.53054000 | 5.67936200  | 0.12559200  | C             | 3.34896000  | -2.66451000 | 0.32678000  |
| C | -2.59201100 | 0.27060100  | 2.18992500  | F             | 2.25701100  | -3.27823700 | 0.83366000  |
| H | -3.53706800 | -0.27411700 | 2.09845600  | F             | 3.51603800  | 0.60896400  | 1.60333200  |
| H | -1.76002500 | -0.44553000 | 2.21026300  | H             | -2.04708700 | -1.40605300 | 0.24654700  |
| H | -2.59065000 | 0.77007900  | 3.15993200  | C             | 0.65283200  | -0.98696100 | 0.63622200  |
| C | -4.56853300 | -1.29423500 | -0.09624100 | H             | -0.17883300 | -0.29507100 | 0.43190100  |
| C | -5.71512800 | -0.50539500 | -0.29513700 | H             | 0.31132000  | -2.01490100 | 0.44721300  |
| C | -6.94323700 | -0.99845400 | 0.14707400  | C             | 0.73450200  | 0.18646800  | 2.85851100  |
| H | -7.83290400 | -0.39335400 | -0.00717200 | H             | 0.15426300  | 1.02740900  | 2.47876000  |
| C | -7.06173700 | -2.23662700 | 0.77087100  | C             | 1.03288000  | -0.85109200 | 2.07280100  |
| C | -5.90868200 | -3.00205200 | 0.94829800  | H             | 1.65265300  | -1.65106000 | 2.47659700  |
| H | -5.98657300 | -3.97436300 | 1.42871500  | H             | 1.10061800  | 0.26008200  | 3.87738100  |
| C | -4.65801200 | -2.56065900 | 0.52856300  |               |             |             |             |
| C | -5.67844700 | 0.84675700  | -0.96153900 | <b>P11_TS</b> |             |             |             |
| H | -6.69120100 | 1.17242000  | -1.20415200 | P             | 1.66800100  | -0.65111400 | -0.04446700 |
| H | -5.22110300 | 1.60212500  | -0.31594700 | B             | -1.37812700 | -0.47493800 | -0.04513800 |
| H | -5.10897300 | 0.82606300  | -1.89489700 | C             | 0.73135900  | -1.03076500 | 1.51697300  |
| C | -8.39746700 | -2.75500200 | 1.23153300  | H             | 0.58912400  | -0.09240400 | 2.05607700  |
| H | -8.68241200 | -3.64487300 | 0.66242800  | C             | 1.43550900  | -2.03962900 | 2.43019700  |
| H | -8.36162100 | -3.03937000 | 2.28671700  | H             | 2.42550100  | -1.67230200 | 2.73034700  |
| H | -9.18042300 | -2.00541000 | 1.10448600  | H             | 1.61313800  | -2.96678800 | 1.86815700  |
| C | -3.45837200 | -3.44651600 | 0.77652500  | C             | 0.57931900  | -2.34417100 | 3.65896000  |
| H | -3.78367200 | -4.41750700 | 1.15172800  | H             | 0.48029300  | -1.43179400 | 4.26360700  |
| H | -2.86973400 | -3.62876500 | -0.12888600 | H             | 1.07821400  | -3.09037500 | 4.28632600  |
| H | -2.78414900 | -3.01429800 | 1.52525300  | C             | -0.80829200 | -2.82449800 | 3.23924400  |
| C | 2.05886100  | 1.03505300  | -0.22325500 | H             | -0.71069600 | -3.77468900 | 2.69593600  |
| C | 1.41747600  | 2.06636200  | -0.90440500 | H             | -1.42258900 | -3.02708000 | 4.12304000  |
| F | 0.70569000  | 1.83975700  | -2.03256400 | C             | -1.50299800 | -1.79918700 | 2.34022600  |
| C | 1.44022700  | 3.39949300  | -0.51001800 | H             | -2.48796800 | -2.17939500 | 2.06226000  |

|   |             |             |             |              |             |             |             |
|---|-------------|-------------|-------------|--------------|-------------|-------------|-------------|
| H | -1.67013700 | -0.88078400 | 2.91110100  | C            | -3.92479000 | 0.39894500  | -0.11506100 |
| C | -0.67750400 | -1.48873800 | 1.07392300  | F            | -3.53917100 | 1.68352200  | -0.10027500 |
| H | -0.56085500 | -2.46173900 | 0.56941700  | C            | -5.29974400 | 0.20729300  | -0.21816800 |
| C | 3.06291400  | -1.86025200 | -0.22324700 | F            | -6.12269600 | 1.25463200  | -0.26408500 |
| C | 2.83106100  | -3.02979500 | -0.98073100 | C            | -5.81350500 | -1.07575000 | -0.28674700 |
| C | 3.85489500  | -3.95917100 | -1.15776300 | F            | -7.12380700 | -1.27640000 | -0.39448300 |
| H | 3.65039400  | -4.85654900 | -1.73681800 | C            | -4.93848500 | -2.15220700 | -0.24220700 |
| C | 5.12220200  | -3.77049300 | -0.61757700 | F            | -5.40879800 | -3.39755500 | -0.31493900 |
| C | 5.33808100  | -2.61810600 | 0.12947400  | C            | -3.57889000 | -1.91264200 | -0.12996700 |
| H | 6.31648300  | -2.45475200 | 0.57559900  | F            | -2.79591700 | -3.01062500 | -0.13102700 |
| C | 4.34380400  | -1.66070200 | 0.34342200  | C            | -0.91090900 | 1.10912900  | 0.01347700  |
| C | 1.50794000  | -3.32748500 | -1.63863400 | C            | -1.06713500 | 1.83206000  | 1.19283000  |
| H | 1.50129000  | -4.34325900 | -2.03795700 | F            | -1.54875500 | 1.21986800  | 2.28740000  |
| H | 0.67076300  | -3.23843200 | -0.94272100 | C            | -0.74592900 | 3.17170000  | 1.35125900  |
| H | 1.32407600  | -2.64291800 | -2.47305600 | F            | -0.85834600 | 3.75726200  | 2.54489500  |
| C | 6.22601800  | -4.76813600 | -0.84719400 | C            | -0.25158900 | 3.88293500  | 0.27037800  |
| H | 5.82462600  | -5.76996400 | -1.01571300 | F            | 0.11903700  | 5.15421500  | 0.40251600  |
| H | 6.81632000  | -4.49448100 | -1.72776900 | C            | -0.09002400 | 3.22905000  | -0.93755300 |
| H | 6.90647100  | -4.80771800 | 0.00661000  | F            | 0.41462400  | 3.88611200  | -1.98316100 |
| C | 4.73322100  | -0.46535500 | 1.17794100  | C            | -0.39182300 | 1.87632300  | -1.02976900 |
| H | 3.97491600  | -0.21908700 | 1.92138800  | F            | -0.07239400 | 1.32108400  | -2.21705900 |
| H | 5.66435000  | -0.67453100 | 1.70822700  | H            | 0.10891200  | -0.76578600 | -1.02863500 |
| H | 4.88438600  | 0.42633100  | 0.56266700  | C            | -1.03041100 | -1.15046200 | -1.79391700 |
| C | 2.39899500  | 1.03455800  | -0.07546400 | H            | -1.24404200 | -2.20729600 | -1.62398400 |
| C | 2.81075400  | 1.45477300  | -1.36515000 | H            | -0.12655000 | -1.14036900 | -2.42614100 |
| C | 3.18746300  | 2.77836900  | -1.56698400 | C            | -3.01944500 | -1.25977200 | -3.29619100 |
| H | 3.47694800  | 3.09437900  | -2.56631100 | H            | -3.09243100 | -2.33562800 | -3.15412700 |
| C | 3.16597200  | 3.71487600  | -0.53538000 | C            | -2.08127200 | -0.53907500 | -2.68936800 |
| C | 2.83543400  | 3.26596400  | 0.73707200  | H            | -2.04118400 | 0.53384100  | -2.84885100 |
| H | 2.85210800  | 3.97190000  | 1.56552900  | H            | -3.75345700 | -0.79550200 | -3.94630000 |
| C | 2.45512100  | 1.94547500  | 1.00046200  |              |             |             |             |
| C | 2.87006400  | 0.50765200  | -2.54075200 | <b>P11_P</b> |             |             |             |
| H | 3.16424900  | 1.04538400  | -3.44367900 | P            | -1.78735400 | -0.65324800 | -0.03936000 |
| H | 3.59274000  | -0.29700500 | -2.37063500 | B            | 1.60087300  | -0.54917500 | 0.37818100  |
| H | 1.89639100  | 0.04549300  | -2.73162600 | C            | -0.54858700 | -1.12306700 | -1.32845100 |
| C | 3.43587200  | 5.16993700  | -0.80323900 | H            | -0.38758500 | -0.20478800 | -1.89522300 |
| H | 2.51225500  | 5.65417600  | -1.13728500 | C            | -1.18952900 | -2.17512500 | -2.25583100 |
| H | 3.77741900  | 5.68594300  | 0.09686300  | H            | -2.19535500 | -1.87319600 | -2.57741200 |
| H | 4.18558400  | 5.30145100  | -1.58708600 | H            | -1.31802100 | -3.10984300 | -1.69356800 |
| C | 2.17490600  | 1.63380900  | 2.45713200  | C            | -0.29819400 | -2.42165100 | -3.46880300 |
| H | 1.13900400  | 1.85916700  | 2.73615100  | H            | -0.22628100 | -1.49494700 | -4.05567700 |
| H | 2.37173500  | 0.59694900  | 2.72787800  | H            | -0.75386800 | -3.17773800 | -4.11660900 |
| H | 2.81536400  | 2.26151900  | 3.08136300  | C            | 1.09091800  | -2.84677500 | -3.00995300 |
| C | -3.00257700 | -0.64371000 | -0.06277400 | H            | 1.01684500  | -3.81900600 | -2.50356800 |

|   |             |             |             |               |             |             |             |
|---|-------------|-------------|-------------|---------------|-------------|-------------|-------------|
| H | 1.74996300  | -2.98909700 | -3.87296200 | H             | -2.18021800 | 0.27554700  | -2.89385400 |
| C | 1.70138500  | -1.82509000 | -2.04909400 | H             | -2.63752200 | 1.87156100  | -3.47526800 |
| H | 2.67715400  | -2.19658900 | -1.74167400 | C             | 3.22564200  | -0.41626700 | 0.07248400  |
| H | 1.87808600  | -0.88185700 | -2.58000800 | C             | 3.97558600  | 0.74183500  | -0.10747200 |
| C | 0.84977800  | -1.54802000 | -0.78549100 | F             | 3.40286200  | 1.95871800  | -0.15757800 |
| H | 0.71648200  | -2.53117800 | -0.30540100 | C             | 5.36322400  | 0.76255600  | -0.23740800 |
| C | -3.08911300 | -1.91808200 | 0.17934600  | F             | 6.00654100  | 1.91971400  | -0.41372900 |
| C | -2.81767800 | -2.98891500 | 1.05951600  | C             | 6.07858400  | -0.41922700 | -0.18102600 |
| C | -3.78825500 | -3.97304500 | 1.24222700  | F             | 7.40557200  | -0.41941900 | -0.30713500 |
| H | -3.57122700 | -4.79825500 | 1.91551700  | C             | 5.38651900  | -1.60731700 | 0.00388300  |
| C | -5.01412700 | -3.93168800 | 0.58591400  | F             | 6.05082300  | -2.76445800 | 0.06205200  |
| C | -5.25733500 | -2.86812500 | -0.27978500 | C             | 4.00763900  | -1.57152300 | 0.12714100  |
| H | -6.20575500 | -2.82340900 | -0.80953400 | F             | 3.41445400  | -2.77242400 | 0.29868300  |
| C | -4.32616400 | -1.85474100 | -0.49949100 | C             | 0.90510200  | 0.97192800  | 0.39971100  |
| C | -1.52555800 | -3.11335600 | 1.82665700  | C             | 0.81933700  | 1.73585100  | -0.76564000 |
| H | -1.46279100 | -4.09228100 | 2.30398500  | F             | 1.31482000  | 1.24513400  | -1.91970500 |
| H | -0.64204500 | -2.99849200 | 1.19326600  | C             | 0.25209900  | 2.99591500  | -0.85626500 |
| H | -1.45460200 | -2.35779000 | 2.61785600  | F             | 0.15182700  | 3.61901400  | -2.03490200 |
| C | -6.05735700 | -4.99211600 | 0.81466800  | C             | -0.28621200 | 3.58259400  | 0.27938900  |
| H | -6.79481900 | -4.65086300 | 1.54831200  | F             | -0.88375700 | 4.77267700  | 0.21024500  |
| H | -6.59392800 | -5.22289500 | -0.10861500 | C             | -0.22885200 | 2.88577200  | 1.47079100  |
| H | -5.61074600 | -5.91301800 | 1.19478400  | F             | -0.80085300 | 3.39051900  | 2.56735700  |
| C | -4.72004000 | -0.74940300 | -1.44865100 | C             | 0.35803600  | 1.62300800  | 1.50373200  |
| H | -3.93792300 | -0.52433900 | -2.17660700 | F             | 0.30466300  | 1.03868000  | 2.71988000  |
| H | -5.61002300 | -1.04416000 | -2.00719500 | H             | -1.11851900 | -0.63819600 | 1.18420700  |
| H | -4.94474900 | 0.17815900  | -0.91451900 | C             | 1.48280400  | -1.30691000 | 1.86167000  |
| C | -2.51369000 | 1.01013000  | -0.15608200 | H             | 1.62230100  | -2.38147900 | 1.69639400  |
| C | -3.01503400 | 1.53238400  | 1.05997300  | H             | 0.47502800  | -1.18857000 | 2.28109100  |
| C | -3.55165100 | 2.81738200  | 1.06940800  | C             | 3.49379200  | -1.61134000 | 3.33170600  |
| H | -3.91852900 | 3.22147100  | 2.00915500  | H             | 3.65736400  | -2.61769300 | 2.95213800  |
| C | -3.61125600 | 3.59955800  | -0.08107300 | C             | 2.47177400  | -0.87273400 | 2.90105200  |
| C | -3.13685200 | 3.05229700  | -1.26998400 | H             | 2.35867300  | 0.13627700  | 3.29617400  |
| H | -3.17960500 | 3.64633500  | -2.17954100 | H             | 4.20645200  | -1.23438600 | 4.05841400  |
| C | -2.58411900 | 1.77352800  | -1.34092900 | <b>P12_TS</b> |             |             |             |
| C | -2.95365500 | 0.78394200  | 2.37109700  | P             | 2.19080200  | -0.95874400 | -0.54338300 |
| H | -3.55936800 | 1.29846700  | 3.11819100  | C             | 1.86414900  | -1.20772400 | -2.33395700 |
| H | -3.33002000 | -0.24072000 | 2.28837600  | H             | 2.69122300  | -0.79982300 | -2.92554500 |
| H | -1.92761700 | 0.74725900  | 2.75402600  | H             | 1.87566300  | -2.29572500 | -2.47130000 |
| C | -4.12597900 | 5.01085900  | -0.03187400 | C             | 0.49511300  | -0.65535000 | -2.74484000 |
| H | -4.57013400 | 5.30691800  | -0.98476600 | H             | 0.49696300  | 0.43740600  | -2.68928700 |
| H | -4.87155700 | 5.13667700  | 0.75607900  | H             | 0.35538500  | -0.90050100 | -3.80405800 |
| H | -3.29467900 | 5.69116200  | 0.17730300  | C             | -0.67409400 | -1.23052600 | -1.92790800 |
| C | -2.07865100 | 1.34405200  | -2.69972700 | H             | -0.56889400 | -2.32491400 | -1.91511100 |
| H | -1.02347200 | 1.61170000  | -2.82428100 |               |             |             |             |

|   |             |             |             |              |             |             |             |
|---|-------------|-------------|-------------|--------------|-------------|-------------|-------------|
| H | -1.58109400 | -1.04686600 | -2.51272500 | C            | -3.33808000 | 0.27564000  | 0.55906600  |
| B | -0.98893300 | -0.67963200 | -0.40175200 | F            | -2.73120800 | 1.33356300  | 1.12071600  |
| C | 3.46023000  | -2.20204000 | -0.12665400 | H            | 0.63290500  | -1.28385400 | 0.19563600  |
| C | 3.04118500  | -3.53395600 | -0.01404700 | C            | -0.46776000 | -1.97089500 | 0.84832700  |
| H | 1.99501800  | -3.79200500 | -0.16713700 | H            | 0.42202300  | -2.61476500 | 0.93586400  |
| C | 3.95724900  | -4.53862700 | 0.27788400  | H            | -1.17566900 | -2.65402100 | 0.36928300  |
| H | 3.62119600  | -5.56678600 | 0.36192200  | C            | -0.33804700 | -2.16342700 | 3.33550900  |
| C | 5.30046600  | -4.22112300 | 0.46499300  | H            | 0.45335800  | -2.90652100 | 3.26875400  |
| H | 6.01577100  | -5.00344100 | 0.69691000  | C            | -0.87692500 | -1.62165800 | 2.24674200  |
| C | 5.72437600  | -2.90056900 | 0.34983900  | H            | -1.65883900 | -0.87262600 | 2.35824000  |
| H | 6.77164500  | -2.65195200 | 0.48754200  | H            | -0.66645500 | -1.88286300 | 4.33025700  |
| C | 4.81129300  | -1.89256900 | 0.05272700  |              |             |             |             |
| H | 5.15194800  | -0.86649600 | -0.04174400 | <b>P12_P</b> |             |             |             |
| C | 2.96491300  | 0.67240800  | -0.34303100 | P            | 2.42666200  | -0.93881400 | -0.57201600 |
| C | 2.88993900  | 1.63337200  | -1.35457200 | C            | 1.72524700  | -1.42515100 | -2.16979400 |
| H | 2.44989700  | 1.38951800  | -2.31592700 | H            | 2.50975900  | -1.20918500 | -2.90665000 |
| C | 3.35555600  | 2.92585000  | -1.12505200 | H            | 1.63289800  | -2.51671800 | -2.11062400 |
| H | 3.27610300  | 3.67156200  | -1.90943700 | C            | 0.36937500  | -0.80258900 | -2.55257000 |
| C | 3.90642200  | 3.26267900  | 0.10727400  | H            | 0.41625000  | 0.28739400  | -2.47566300 |
| H | 4.25714400  | 4.27340500  | 0.28749900  | H            | 0.26010800  | -1.02042900 | -3.62200000 |
| C | 3.99626700  | 2.30305900  | 1.11420700  | C            | -0.84738200 | -1.34872000 | -1.79306000 |
| H | 4.41283000  | 2.56521800  | 2.08091200  | H            | -0.79545400 | -2.44626200 | -1.83250500 |
| C | 3.51889600  | 1.01649500  | 0.89723000  | H            | -1.70610000 | -1.09057100 | -2.42160900 |
| H | 3.55917300  | 0.28269200  | 1.69765000  | B            | -1.21341100 | -0.87588900 | -0.22472700 |
| C | -0.42460300 | 0.83692100  | -0.13507300 | C            | 3.78490200  | -2.03772800 | -0.13920000 |
| C | -0.79354100 | 1.82945600  | -1.04230700 | C            | 3.53540800  | -3.11184000 | 0.72030800  |
| F | -1.53961300 | 1.50352900  | -2.11226800 | H            | 2.54824900  | -3.25204700 | 1.15461600  |
| C | -0.44708200 | 3.16721500  | -0.92114500 | C            | 4.56410700  | -3.99764900 | 1.02595900  |
| F | -0.81643700 | 4.05653400  | -1.84303300 | H            | 4.37659900  | -4.82867300 | 1.69708400  |
| C | 0.28525600  | 3.57823200  | 0.18377200  | C            | 5.82980500  | -3.80996500 | 0.47692800  |
| F | 0.64531400  | 4.85210100  | 0.31990200  | H            | 6.63065300  | -4.50081200 | 0.71923900  |
| C | 0.65532500  | 2.63999600  | 1.13165800  | C            | 6.07773000  | -2.73593200 | -0.37671400 |
| F | 1.36399000  | 3.01573400  | 2.19773200  | H            | 7.06728300  | -2.59076100 | -0.79644500 |
| C | 0.30625900  | 1.30768000  | 0.94973400  | C            | 5.05740100  | -1.84487600 | -0.68657100 |
| F | 0.78045300  | 0.45794500  | 1.87858900  | H            | 5.25165600  | -0.99526200 | -1.33629600 |
| C | -2.61327300 | -0.71023700 | -0.11143200 | C            | 3.02602300  | 0.75547000  | -0.55751400 |
| C | -3.39792500 | -1.77337800 | -0.56308200 | C            | 2.79009000  | 1.62317400  | -1.62656300 |
| F | -2.81910400 | -2.82767900 | -1.16805500 | H            | 2.27929000  | 1.28003100  | -2.51986500 |
| C | -4.77385200 | -1.85712000 | -0.40805700 | C            | 3.20338800  | 2.94963300  | -1.53457100 |
| F | -5.44933300 | -2.90861700 | -0.87071600 | H            | 3.00471400  | 3.63097800  | -2.35474000 |
| C | -5.44531700 | -0.83166200 | 0.24124200  | C            | 3.84029200  | 3.40410700  | -0.38395600 |
| F | -6.76385700 | -0.88641200 | 0.40392100  | H            | 4.13607200  | 4.44487800  | -0.30699700 |
| C | -4.71845000 | 0.23884100  | 0.73336400  | C            | 4.08730000  | 2.53280200  | 0.67636600  |
| F | -5.34224200 | 1.22116800  | 1.38285900  | H            | 4.57145900  | 2.89145400  | 1.57773400  |

|               |             |             |             |   |             |             |             |
|---------------|-------------|-------------|-------------|---|-------------|-------------|-------------|
| C             | 3.68537100  | 1.20657500  | 0.59271500  | H | 0.36797900  | -2.61923200 | 3.06302500  |
| H             | 3.85543100  | 0.53343800  | 1.42914400  | H | 0.74034200  | -0.93130300 | 2.84423600  |
| C             | -0.49210200 | 0.58678400  | 0.10244900  | C | 0.39080200  | -2.02199500 | 0.97843300  |
| C             | -0.73923000 | 1.66262700  | -0.75503000 | H | -0.53107900 | -2.45488200 | 0.56333100  |
| F             | -1.52350200 | 1.48151300  | -1.83117600 | H | 1.09849400  | -2.85038500 | 0.91056000  |
| C             | -0.22304400 | 2.93874400  | -0.59045700 | C | -3.09958200 | 0.99635200  | -0.36346100 |
| F             | -0.46597400 | 3.90362900  | -1.48046000 | C | -3.83766000 | 0.90874200  | -1.55078900 |
| C             | 0.57473900  | 3.21008700  | 0.51375800  | H | -3.93137000 | -0.04898800 | -2.05772100 |
| F             | 1.11730700  | 4.41790800  | 0.67670000  | C | -4.45631500 | 2.03707800  | -2.07379000 |
| C             | 0.84078300  | 2.19218800  | 1.40955400  | H | -5.02799700 | 1.96124200  | -2.99298600 |
| F             | 1.65494600  | 2.41201000  | 2.44755400  | C | -4.33741000 | 3.26493100  | -1.42363000 |
| C             | 0.32022800  | 0.92179500  | 1.17905100  | H | -4.81145100 | 4.14769700  | -1.83988900 |
| F             | 0.75279000  | -0.02226800 | 2.04426400  | C | -3.61008800 | 3.35722500  | -0.24283700 |
| C             | -2.85973700 | -0.66842800 | -0.13751000 | H | -3.51108800 | 4.31071900  | 0.26527500  |
| C             | -3.70838800 | -1.64107100 | -0.66703300 | C | -2.99856500 | 2.22516300  | 0.29204100  |
| F             | -3.19301800 | -2.73243200 | -1.26682500 | H | -2.43643300 | 2.31255200  | 1.21685900  |
| C             | -5.09494500 | -1.58878300 | -0.61460700 | C | -3.51744100 | -1.76967700 | 0.26079500  |
| F             | -5.83836300 | -2.56147800 | -1.14819000 | C | -4.80935200 | -1.43583600 | 0.68439100  |
| C             | -5.70949900 | -0.51341800 | 0.00891200  | H | -5.04872400 | -0.40442700 | 0.93086600  |
| F             | -7.03893900 | -0.43542400 | 0.07257700  | C | -5.79274800 | -2.41460800 | 0.77493800  |
| C             | -4.91848500 | 0.47364500  | 0.57206700  | H | -6.79240500 | -2.14561600 | 1.10014200  |
| F             | -5.49124300 | 1.51117300  | 1.18764800  | C | -5.49438500 | -3.73549900 | 0.44684100  |
| C             | -3.53264700 | 0.37170900  | 0.50028700  | H | -6.26251600 | -4.49878400 | 0.51890000  |
| F             | -2.86311500 | 1.36434000  | 1.11433300  | C | -4.21263100 | -4.07461000 | 0.02534800  |
| H             | 1.48011600  | -1.13129200 | 0.43296300  | H | -3.97720300 | -5.10161500 | -0.23379300 |
| C             | -0.89236700 | -2.10964700 | 0.83903400  | C | -3.22666400 | -3.09549600 | -0.06997500 |
| H             | 0.16680300  | -2.41128800 | 0.89791100  | H | -2.23293300 | -3.36296200 | -0.41441500 |
| H             | -1.39827200 | -2.97107400 | 0.37748800  | C | 0.77479400  | 0.74165300  | 0.33079800  |
| C             | -0.74339200 | -2.14468500 | 3.36268000  | C | 0.14184300  | 1.70839300  | -0.44533500 |
| H             | 0.31622700  | -2.39440800 | 3.35231800  | F | -0.47538400 | 1.37383200  | -1.59248200 |
| C             | -1.42489500 | -1.97414300 | 2.23210000  | C | 0.08009900  | 3.05728700  | -0.10958500 |
| H             | -2.48335700 | -1.71780500 | 2.30233900  | F | -0.58560200 | 3.91827600  | -0.87751800 |
| H             | -1.20771200 | -2.02894700 | 4.33651100  | C | 0.70952000  | 3.50213800  | 1.04094200  |
|               |             |             |             | F | 0.65251000  | 4.78512900  | 1.38771100  |
|               |             |             |             | C | 1.41291200  | 2.59249300  | 1.82006600  |
|               |             |             |             | F | 2.06055400  | 3.01183800  | 2.90504400  |
|               |             |             |             | C | 1.44940900  | 1.25798800  | 1.43996700  |
|               |             |             |             | F | 2.21421500  | 0.45194000  | 2.19456400  |
|               |             |             |             | C | 2.56272800  | -0.97749900 | -0.36223000 |
|               |             |             |             | C | 3.17691600  | -0.25945900 | -1.39205500 |
|               |             |             |             | F | 2.45141700  | 0.55317300  | -2.18524000 |
|               |             |             |             | C | 4.53667100  | -0.28897600 | -1.66826800 |
|               |             |             |             | F | 5.03837700  | 0.40645500  | -2.68838400 |
|               |             |             |             | C | 5.37772000  | -1.03004700 | -0.85233800 |
| <b>P13_TS</b> |             |             |             |   |             |             |             |
| P             | -2.21448800 | -0.48311000 | 0.22966100  |   |             |             |             |
| B             | 0.95097900  | -0.85026800 | -0.03709000 |   |             |             |             |
| C             | -1.91200200 | -0.18222700 | 2.02720100  |   |             |             |             |
| H             | -1.21358000 | 0.65664500  | 2.11761700  |   |             |             |             |
| H             | -2.87243000 | 0.12757700  | 2.45574800  |   |             |             |             |
| C             | -1.35757800 | -1.40893900 | 2.76709900  |   |             |             |             |
| H             | -1.47327800 | -1.22169200 | 3.84033800  |   |             |             |             |
| H             | -1.98502300 | -2.28059500 | 2.53891100  |   |             |             |             |
| C             | 0.10795200  | -1.73722700 | 2.46734800  |   |             |             |             |

|              |             |             |             |               |             |             |             |
|--------------|-------------|-------------|-------------|---------------|-------------|-------------|-------------|
| F            | 6.68563800  | -1.07197800 | -1.08956600 | C             | -5.66905200 | 3.23980200  | -0.54449900 |
| C            | 4.83577900  | -1.70814400 | 0.22643200  | H             | -6.67754000 | 3.22279800  | -0.94325000 |
| F            | 5.63328400  | -2.38759300 | 1.05019100  | C             | -5.16996100 | 4.39723500  | 0.05151100  |
| C            | 3.46508500  | -1.65599900 | 0.45933300  | H             | -5.79284100 | 5.28374800  | 0.11016900  |
| F            | 3.06545500  | -2.28259200 | 1.57570900  | C             | -3.88102400 | 4.42140000  | 0.57651700  |
| H            | -0.77770400 | -0.83475400 | -0.67697500 | H             | -3.49855200 | 5.32144400  | 1.04528000  |
| C            | 0.18111200  | -1.30915500 | -1.71452200 | C             | -3.07658400 | 3.28760500  | 0.50278700  |
| H            | 0.54493400  | -2.33944700 | -1.66413700 | H             | -2.07019200 | 3.30336000  | 0.91330800  |
| H            | 0.87239500  | -0.68946700 | -2.27926100 | C             | 0.55275400  | -0.74922500 | 0.04587800  |
| C            | -1.71099600 | -2.40105100 | -2.97505100 | C             | -0.37368700 | -1.42320700 | 0.83925100  |
| H            | -1.33654000 | -3.39804600 | -2.75625200 | F             | -0.88703800 | -0.85175600 | 1.95349200  |
| C            | -1.08311000 | -1.31000000 | -2.54017700 | C             | -0.91225800 | -2.67270600 | 0.54589000  |
| H            | -1.47811800 | -0.32731700 | -2.79387700 | F             | -1.84765200 | -3.20814000 | 1.33372400  |
| H            | -2.60692100 | -2.33325400 | -3.58378900 | C             | -0.51732500 | -3.33343000 | -0.60324100 |
| <b>P13_P</b> |             |             |             | F             | -1.05252400 | -4.51046400 | -0.92708700 |
| P            | -2.53507900 | 0.67020400  | -0.24594800 | C             | 0.43654000  | -2.73692400 | -1.41762100 |
| B            | 1.21221700  | 0.75850600  | 0.36472200  | F             | 0.84872700  | -3.36574300 | -2.51846400 |
| C            | -1.92338800 | 0.50568200  | -1.94784200 | C             | 0.94913400  | -1.49037700 | -1.07426800 |
| H            | -1.33004300 | -0.41566000 | -1.98643500 | F             | 1.87307000  | -1.00941700 | -1.92177300 |
| H            | -2.83762300 | 0.34916800  | -2.53497200 | C             | 2.84066900  | 0.55782300  | 0.17004700  |
| C            | -1.13315500 | 1.70827200  | -2.49758800 | C             | 3.53067000  | -0.31230400 | 1.01185000  |
| H            | -1.21911400 | 1.64983600  | -3.58793400 | F             | 2.85911000  | -1.03593100 | 1.92864700  |
| H            | -1.63196700 | 2.64022700  | -2.19956200 | C             | 4.90487200  | -0.50633500 | 0.98319900  |
| C            | 0.34414700  | 1.74919200  | -2.10229400 | F             | 5.49743900  | -1.35416300 | 1.82871900  |
| H            | 0.79814500  | 2.56008100  | -2.68110500 | C             | 5.66685000  | 0.18932400  | 0.05682100  |
| H            | 0.82645500  | 0.83422000  | -2.45904400 | F             | 6.98909600  | 0.02158200  | 0.00309300  |
| C            | 0.60125200  | 1.96223300  | -0.59573300 | C             | 5.03200100  | 1.05309700  | -0.81957600 |
| H            | -0.32722000 | 2.35730300  | -0.14481600 | F             | 5.74999300  | 1.71960900  | -1.72865000 |
| H            | 1.29647800  | 2.80041000  | -0.48397600 | C             | 3.65202600  | 1.21100500  | -0.75078600 |
| C            | -3.49325900 | -0.78644600 | 0.20528800  | F             | 3.13252000  | 2.04893600  | -1.66955900 |
| C            | -3.94403400 | -0.89610600 | 1.52472200  | H             | -1.51438300 | 0.83088500  | 0.69111100  |
| H            | -3.71392800 | -0.12049300 | 2.25031600  | C             | 0.95414900  | 1.22419500  | 1.93957500  |
| C            | -4.67833900 | -2.01133000 | 1.90786700  | H             | 1.18353900  | 0.41472700  | 2.63845400  |
| H            | -5.02568000 | -2.10151900 | 2.93114200  | H             | -0.11192900 | 1.46775200  | 2.08976000  |
| C            | -4.94968400 | -3.01778600 | 0.98379500  | C             | 2.85170000  | 2.41513800  | 3.07301000  |
| H            | -5.51269000 | -3.89345600 | 1.28924800  | H             | 3.19908700  | 1.48954900  | 3.52740600  |
| C            | -4.48969700 | -2.91455000 | -0.32575900 | C             | 1.76449600  | 2.42932000  | 2.30349500  |
| H            | -4.68709200 | -3.70660000 | -1.03973200 | H             | 1.45900600  | 3.37904000  | 1.85885300  |
| C            | -3.76449200 | -1.79567600 | -0.72274400 | H             | 3.43355300  | 3.31066700  | 3.26627700  |
| H            | -3.39569900 | -1.73094700 | -1.74164400 | <b>P14_TS</b> |             |             |             |
| C            | -3.57690700 | 2.13068900  | -0.10164000 | P             | 2.92179300  | -0.33866800 | -0.12109900 |
| C            | -4.87532500 | 2.10216900  | -0.62082700 | B             | -0.45076000 | -0.04424600 | -0.10589900 |
| H            | -5.26785700 | 1.19057500  | -1.06503500 | C             | 2.45743700  | 1.15583400  | -1.08768500 |

|   |             |             |             |              |             |             |             |
|---|-------------|-------------|-------------|--------------|-------------|-------------|-------------|
| H | 2.08839000  | 1.85015100  | -0.32506900 | F            | -2.56049000 | 0.95867600  | -1.75927500 |
| H | 3.30695500  | 1.63603400  | -1.58401900 | C            | -1.56661100 | -1.23094500 | -0.01666000 |
| C | 1.30691500  | 0.84408100  | -2.06296000 | C            | -1.17417500 | -2.55944500 | -0.15519800 |
| H | 1.72546200  | 0.51185200  | -3.02134700 | F            | 0.13533200  | -2.86589900 | -0.29740000 |
| H | 0.78847600  | 1.78655500  | -2.27386600 | C            | -2.03992500 | -3.64326100 | -0.09429100 |
| C | 0.29501500  | -0.20170800 | -1.56553800 | F            | -1.58546500 | -4.88946400 | -0.23338200 |
| H | 0.71002300  | -1.20286100 | -1.66360300 | C            | -3.38914600 | -3.41370700 | 0.12624700  |
| H | -0.55048500 | -0.18037000 | -2.26411800 | F            | -4.24431700 | -4.43106100 | 0.18771500  |
| C | 3.83367200  | -1.52931500 | -1.28896700 | C            | -3.83125400 | -2.11131900 | 0.30499200  |
| C | 4.78502000  | -0.78561100 | -2.23649100 | F            | -5.11948200 | -1.88147500 | 0.55696100  |
| H | 5.26890100  | -1.51878600 | -2.89220000 | C            | -2.92386200 | -1.06016700 | 0.24839100  |
| H | 5.57060200  | -0.23517200 | -1.71882000 | F            | -3.42529200 | 0.14959100  | 0.52035200  |
| H | 4.23708600  | -0.08745900 | -2.87662600 | H            | 1.20557000  | -0.42935300 | 0.46819200  |
| C | 4.59316900  | -2.58068700 | -0.46555700 | C            | 0.33996800  | -0.43818000 | 1.61940500  |
| H | 3.92251000  | -3.10988000 | 0.21912400  | H            | 0.50877100  | -1.51572300 | 1.71695300  |
| H | 5.42048800  | -2.16407500 | 0.11005300  | H            | 1.20486100  | 0.07760900  | 2.04623300  |
| H | 5.01503700  | -3.32135500 | -1.15340900 | C            | -1.60989500 | -0.90188600 | 3.12484900  |
| C | 2.82611800  | -2.29928000 | -2.15895200 | H            | -1.50761500 | -1.97444900 | 2.97558200  |
| H | 2.30750800  | -1.64736400 | -2.86450400 | C            | -0.81081600 | -0.03508000 | 2.51058200  |
| H | 2.08478200  | -2.83280000 | -1.56051400 | H            | -0.93804200 | 1.02982800  | 2.67848700  |
| H | 3.38485300  | -3.03697600 | -2.74574900 | H            | -2.40109500 | -0.56605200 | 3.78646700  |
| C | 4.11365600  | 0.28150400  | 1.22151500  |              |             |             |             |
| C | 3.57128500  | 1.59666400  | 1.80794100  | <b>P14_P</b> |             |             |             |
| H | 2.54388300  | 1.52353500  | 2.16443400  | P            | 3.34505700  | -0.74115000 | -0.06651300 |
| H | 3.62341200  | 2.41818800  | 1.08900700  | B            | -0.60694800 | -0.18756900 | -0.00967600 |
| H | 4.19916400  | 1.86761000  | 2.66365800  | C            | 2.44761000  | 0.69735700  | -0.72929300 |
| C | 5.53331300  | 0.58213700  | 0.72222700  | H            | 1.97026800  | 1.15150900  | 0.14258400  |
| H | 6.10625500  | 1.01514200  | 1.55034100  | H            | 3.21702800  | 1.39371900  | -1.08816400 |
| H | 5.52581500  | 1.31569200  | -0.08989600 | C            | 1.38050200  | 0.41129400  | -1.79803700 |
| H | 6.07176700  | -0.30453500 | 0.38519700  | H            | 1.87008900  | 0.09593900  | -2.72914000 |
| C | 4.15582600  | -0.75758600 | 2.35473100  | H            | 0.92693500  | 1.38440600  | -2.01885800 |
| H | 4.56392700  | -1.71757700 | 2.03475600  | C            | 0.29647100  | -0.57599300 | -1.35461100 |
| H | 3.15841300  | -0.93476700 | 2.76851100  | H            | 0.74193600  | -1.56933100 | -1.21629800 |
| H | 4.79145600  | -0.37890800 | 3.16298600  | H            | -0.38857500 | -0.68979400 | -2.20449600 |
| C | -0.98315800 | 1.49812900  | -0.07365900 | C            | 4.21583300  | -1.68740000 | -1.41165000 |
| C | -0.41691400 | 2.56069600  | 0.61579100  | C            | 4.88849800  | -0.70364500 | -2.38002900 |
| F | 0.59813200  | 2.34979300  | 1.48484500  | H            | 5.38464800  | -1.27892400 | -3.16795900 |
| C | -0.80904100 | 3.88814700  | 0.47719400  | H            | 5.64740400  | -0.08758500 | -1.89067400 |
| F | -0.21352000 | 4.84750900  | 1.18622600  | H            | 4.15921000  | -0.04588700 | -2.86088400 |
| C | -1.81685500 | 4.20551000  | -0.41686500 | C            | 5.25002700  | -2.65913800 | -0.82667500 |
| F | -2.20943000 | 5.46653200  | -0.57479000 | H            | 4.79627600  | -3.35780200 | -0.11717400 |
| C | -2.40412500 | 3.18741100  | -1.15687400 | H            | 6.08446500  | -2.15125700 | -0.33943000 |
| F | -3.36233800 | 3.47705500  | -2.03489700 | H            | 5.66068400  | -3.24924500 | -1.65203400 |
| C | -1.97368500 | 1.88076300  | -0.98207800 | C            | 3.15910200  | -2.51993200 | -2.16219400 |



|   |             |             |             |               |             |             |             |
|---|-------------|-------------|-------------|---------------|-------------|-------------|-------------|
| H | 2.39760600  | -1.90630300 | -2.64368400 | C             | -0.73847200 | -0.40317900 | 2.62115800  |
| H | 2.65653000  | -3.23030100 | -1.49898100 | H             | -0.74929600 | 0.63604200  | 2.95032600  |
| H | 3.67581400  | -3.09193300 | -2.93987900 | H             | -2.12795700 | -0.99704200 | 4.10237500  |
| C | 4.41526100  | -0.17428500 | 1.35267400  |               |             |             |             |
| C | 3.62033400  | 0.85069800  | 2.18404200  | <b>P15_TS</b> |             |             |             |
| H | 2.67766100  | 0.44678900  | 2.56142300  | P             | 1.13578700  | -0.69309100 | 0.33267900  |
| H | 3.40424600  | 1.76693400  | 1.63075300  | B             | -1.52197000 | -0.43750600 | 0.37070400  |
| H | 4.23766500  | 1.12095700  | 3.04675300  | C             | -0.36860800 | -1.17475300 | -0.57763200 |
| C | 5.69079400  | 0.50121400  | 0.83052300  | H             | -0.36045900 | -2.23202100 | -0.26358900 |
| H | 6.23926700  | 0.90432100  | 1.68782300  | C             | -0.52315500 | -1.15000700 | -2.09565600 |
| H | 5.46385300  | 1.34005000  | 0.16485100  | H             | -0.64709200 | -0.12866000 | -2.45489700 |
| H | 6.35700900  | -0.19021200 | 0.30958400  | H             | -1.46729500 | -1.66470000 | -2.31139400 |
| C | 4.74976000  | -1.37256400 | 2.25423800  | C             | 0.61430900  | -1.83734400 | -2.84536300 |
| H | 5.34903000  | -2.13357000 | 1.75257400  | H             | 1.54796100  | -1.27577600 | -2.74743800 |
| H | 3.84072200  | -1.83991700 | 2.64490600  | H             | 0.38889200  | -1.91361800 | -3.91191300 |
| H | 5.32675700  | -1.00714300 | 3.10959300  | H             | 0.78096900  | -2.85164900 | -2.46527500 |
| C | -0.84886700 | 1.44691800  | -0.07764800 | C             | 1.90043500  | 0.93056100  | 0.03668900  |
| C | -0.20069600 | 2.40988000  | 0.68427000  | C             | 1.75959300  | 1.69985400  | -1.11241400 |
| F | 0.68710900  | 2.05888900  | 1.65356900  | F             | 1.15755200  | 1.20406000  | -2.19046600 |
| C | -0.35231900 | 3.78399000  | 0.51760100  | C             | 2.21234300  | 3.01023400  | -1.17473600 |
| F | 0.31824300  | 4.64203700  | 1.29283000  | F             | 2.01872400  | 3.73559800  | -2.26833200 |
| C | -1.19504700 | 4.25661500  | -0.47239000 | C             | 2.84199900  | 3.57150600  | -0.07053000 |
| F | -1.35519200 | 5.56649700  | -0.65926400 | F             | 3.27207600  | 4.82097700  | -0.12096500 |
| C | -1.85947400 | 3.34276200  | -1.28063300 | C             | 3.02425900  | 2.81977900  | 1.08403600  |
| F | -2.66214400 | 3.78309800  | -2.25091600 | F             | 3.62501400  | 3.35440000  | 2.13760400  |
| C | -1.66733600 | 1.98544700  | -1.07247400 | C             | 2.55016800  | 1.51736700  | 1.12381600  |
| F | -2.32354600 | 1.16355900  | -1.90547200 | F             | 2.71196300  | 0.82244700  | 2.24926700  |
| C | -2.02343900 | -1.03454300 | -0.05495800 | C             | 2.47626600  | -1.90172800 | 0.09819100  |
| C | -2.02096800 | -2.40309000 | -0.31094500 | C             | 3.51712200  | -1.75955400 | -0.81723900 |
| F | -0.86714400 | -3.04409600 | -0.60839300 | F             | 3.57627100  | -0.69556600 | -1.61825900 |
| C | -3.14442400 | -3.21809700 | -0.25122800 | C             | 4.50975200  | -2.71991600 | -0.94968200 |
| F | -3.05447700 | -4.52686100 | -0.51125600 | F             | 5.48797100  | -2.56345900 | -1.83222200 |
| C | -4.36624200 | -2.66249800 | 0.09063200  | C             | 4.46998700  | -3.85830300 | -0.15281100 |
| F | -5.46173200 | -3.42122800 | 0.15282900  | F             | 5.41041500  | -4.78121300 | -0.27433600 |
| C | -4.42814300 | -1.30749700 | 0.37434200  | C             | 3.44050300  | -4.03527000 | 0.76381000  |
| F | -5.59460500 | -0.75666400 | 0.71952900  | F             | 3.40308700  | -5.12418500 | 1.52048500  |
| C | -3.27255400 | -0.53800300 | 0.30853700  | C             | 2.46410200  | -3.05650400 | 0.87823000  |
| F | -3.42749800 | 0.75354300  | 0.64079800  | F             | 1.47969900  | -3.24478400 | 1.76016100  |
| H | 2.42301200  | -1.63981500 | 0.48955400  | C             | -1.30219000 | 1.18601800  | 0.32460900  |
| C | 0.09020300  | -0.69599300 | 1.41048900  | C             | -1.67989700 | 1.88536900  | -0.82379100 |
| H | 0.23511000  | -1.78440400 | 1.32492300  | F             | -2.36185100 | 1.25531100  | -1.79049800 |
| H | 1.07788100  | -0.24317400 | 1.55692600  | C             | -1.38885900 | 3.22182300  | -1.05592400 |
| C | -1.50164800 | -1.28558000 | 3.26460100  | F             | -1.75970900 | 3.81431200  | -2.18654100 |
| H | -1.53613100 | -2.32933300 | 2.95844100  | C             | -0.69505800 | 3.94115500  | -0.09118600 |

|              |             |             |             |   |             |             |             |
|--------------|-------------|-------------|-------------|---|-------------|-------------|-------------|
| F            | -0.34915100 | 5.20521400  | -0.30720800 | F | 3.00230200  | 4.91232000  | -0.27983000 |
| C            | -0.32164600 | 3.30678300  | 1.08123500  | C | 2.87005100  | 2.97541200  | 1.03626100  |
| F            | 0.40071600  | 3.96298500  | 1.99218800  | F | 3.42573900  | 3.60366700  | 2.05910700  |
| C            | -0.62944900 | 1.96313400  | 1.26094000  | C | 2.47465800  | 1.65201800  | 1.15193100  |
| F            | -0.11870300 | 1.41121600  | 2.38449500  | F | 2.68131400  | 1.02952600  | 2.31031700  |
| C            | -3.03142200 | -0.92271600 | 0.01685100  | C | 2.63508000  | -1.82821200 | 0.12793400  |
| C            | -4.15169900 | -0.09284200 | 0.07715700  | C | 3.61347200  | -1.64687100 | -0.84666900 |
| F            | -4.03243400 | 1.19765800  | 0.40824400  | F | 3.56765900  | -0.59174300 | -1.65932900 |
| C            | -5.44637800 | -0.52916300 | -0.17171200 | C | 4.63919400  | -2.56393400 | -1.02095200 |
| F            | -6.47221600 | 0.31669600  | -0.09851400 | F | 5.55910800  | -2.37728000 | -1.95559700 |
| C            | -5.67464300 | -1.86199500 | -0.48047200 | C | 4.69637400  | -3.68824700 | -0.20336300 |
| F            | -6.90827800 | -2.29546200 | -0.71524000 | F | 5.67033300  | -4.56560400 | -0.36303100 |
| C            | -4.60007400 | -2.73587100 | -0.53316700 | C | 3.73047600  | -3.89864300 | 0.77448200  |
| F            | -4.79482600 | -4.02310600 | -0.81594500 | F | 3.78860100  | -4.97167700 | 1.54737400  |
| C            | -3.32219700 | -2.25158400 | -0.28421900 | C | 2.71423800  | -2.96742600 | 0.92595200  |
| F            | -2.33907700 | -3.17281800 | -0.32157400 | F | 1.78636800  | -3.17682900 | 1.85821500  |
| H            | -0.06621700 | -0.73273500 | 1.55658000  | C | -1.36566100 | 1.14794900  | 0.36469600  |
| C            | -1.34106500 | -1.09588500 | 2.09310800  | C | -1.71915700 | 1.79433400  | -0.82131300 |
| H            | -1.62347500 | -2.13396200 | 1.89357800  | F | -2.35607000 | 1.12201600  | -1.79036800 |
| H            | -0.48476100 | -1.20167700 | 2.79256600  | C | -1.43772800 | 3.12558500  | -1.10329200 |
| C            | -3.58488000 | -0.82384100 | 3.16259400  | F | -1.78080700 | 3.66558500  | -2.26995300 |
| H            | -3.91618400 | -1.78854500 | 2.78521400  | C | -0.77533200 | 3.89408500  | -0.15559700 |
| C            | -2.36767900 | -0.35522800 | 2.90564000  | F | -0.41934200 | 5.14786700  | -0.42390000 |
| H            | -2.06413200 | 0.61216400  | 3.29406400  | C | -0.41360200 | 3.31118200  | 1.04675800  |
| H            | -4.29198900 | -0.25394200 | 3.75548600  | F | 0.30095100  | 4.01037600  | 1.93573000  |
| <b>P15_P</b> |             |             |             | C | -0.70541200 | 1.97099000  | 1.26989800  |
| P            | 1.24362200  | -0.69348800 | 0.40123000  | F | -0.17412300 | 1.45843500  | 2.40371600  |
| B            | -1.59567500 | -0.47217600 | 0.60001700  | C | -3.04174200 | -0.99822400 | 0.02265600  |
| C            | -0.33913500 | -1.26942400 | -0.23897500 | C | -4.18332200 | -0.19938200 | -0.02232600 |
| H            | -0.29155200 | -2.29465800 | 0.16745100  | F | -4.11290600 | 1.11044100  | 0.25467900  |
| C            | -0.48487300 | -1.35528400 | -1.76586700 | C | -5.45067500 | -0.67599300 | -0.33323000 |
| H            | -0.65789400 | -0.36066400 | -2.17759800 | F | -6.49719200 | 0.14920900  | -0.36363600 |
| H            | -1.41235400 | -1.91060300 | -1.92421100 | C | -5.63192900 | -2.02490500 | -0.59668100 |
| C            | 0.64703500  | -2.05188800 | -2.51691700 | F | -6.83965500 | -2.49936700 | -0.89329300 |
| H            | 1.55951500  | -1.44785700 | -2.53395100 | C | -4.53633400 | -2.87184100 | -0.54232200 |
| H            | 0.36270800  | -2.22480500 | -3.55762300 | F | -4.68369900 | -4.17648000 | -0.78059000 |
| H            | 0.88085900  | -3.02519500 | -2.07069600 | C | -3.29104800 | -2.34466000 | -0.22752900 |
| C            | 1.86967200  | 0.97333300  | 0.09201600  | F | -2.28260000 | -3.24452900 | -0.16428000 |
| C            | 1.69066500  | 1.66088600  | -1.10367500 | H | 1.13406300  | -0.69541700 | 1.79006100  |
| F            | 1.13806700  | 1.05299100  | -2.14834200 | C | -1.61219200 | -0.95187200 | 2.18117500  |
| C            | 2.06965300  | 2.98731600  | -1.23954200 | H | -1.83627400 | -2.02723100 | 2.18146000  |
| F            | 1.84557200  | 3.63522200  | -2.37202700 | H | -0.64919700 | -0.83444300 | 2.69426300  |
| C            | 2.65278300  | 3.64604400  | -0.16217000 | C | -3.85556000 | -0.72867000 | 3.28767100  |
|              |             |             |             | H | -4.13645000 | -1.74046300 | 3.00192500  |

|   |             |             |            |
|---|-------------|-------------|------------|
| C | -2.65831400 | -0.23425000 | 2.97895900 |
| H | -2.41990800 | 0.78660500  | 3.27789800 |
| H | -4.59407300 | -0.14586300 | 3.82799900 |

**P16\_TS**

|   |             |             |             |
|---|-------------|-------------|-------------|
| C | 0.45791000  | 1.66724000  | -2.89774600 |
| H | 1.46962000  | 1.42991500  | -2.56840500 |
| H | 0.39484300  | 2.73603400  | -3.13006800 |
| H | 0.27989000  | 1.12790400  | -3.83365400 |
| C | -0.58449100 | 1.28473100  | -1.89660000 |
| H | -1.61617400 | 1.36225600  | -2.24734300 |
| C | -0.41934700 | 0.84377000  | -0.64556100 |
| P | 1.10732700  | 0.70081000  | 0.29882700  |
| C | 2.26724400  | 2.07806800  | 0.05556000  |
| C | 3.34943800  | 2.07533700  | -0.82160000 |
| F | 3.57675500  | 1.02467700  | -1.61036400 |
| C | 4.20238900  | 3.16395500  | -0.93229800 |
| F | 5.22314600  | 3.14006300  | -1.77962300 |
| C | 3.97594200  | 4.29047500  | -0.14990200 |
| F | 4.78219400  | 5.33452800  | -0.25097900 |
| C | 2.90080300  | 4.32803600  | 0.73011800  |
| F | 2.68862700  | 5.40578700  | 1.47275400  |
| C | 2.06751800  | 3.22349600  | 0.82402000  |
| F | 1.04490600  | 3.27422800  | 1.67837500  |
| C | 2.01494200  | -0.84351300 | 0.00161200  |
| C | 2.70655700  | -1.39533600 | 1.08034300  |
| F | 2.85145800  | -0.68603100 | 2.19913700  |
| C | 3.23330600  | -2.67659300 | 1.03840500  |
| F | 3.87751800  | -3.18081900 | 2.08099700  |
| C | 3.05845300  | -3.44183700 | -0.10920500 |
| F | 3.53969300  | -4.67238800 | -0.16039500 |
| C | 2.38029600  | -2.91702500 | -1.20234500 |
| F | 2.18937200  | -3.66163600 | -2.28345100 |
| C | 1.87440100  | -1.62532000 | -1.14185200 |
| F | 1.22152500  | -1.16841500 | -2.20626700 |
| B | -1.54463500 | 0.25978000  | 0.38653800  |
| C | -3.05060100 | 0.71060900  | 0.01430400  |
| C | -4.15424000 | -0.13884400 | -0.01776800 |
| F | -4.02147000 | -1.44417600 | 0.24057100  |
| C | -5.44470100 | 0.29785800  | -0.28970200 |
| F | -6.46280200 | -0.56036800 | -0.30873900 |
| C | -5.67735200 | 1.64469500  | -0.52767700 |
| F | -6.90770500 | 2.07743000  | -0.78293200 |
| C | -4.61504100 | 2.53528500  | -0.48801000 |

|   |             |             |             |
|---|-------------|-------------|-------------|
| F | -4.82257800 | 3.83478700  | -0.69808800 |
| C | -3.34015100 | 2.05379100  | -0.21958800 |
| F | -2.36320800 | 2.97565400  | -0.15221100 |
| C | -1.23867000 | -1.35157700 | 0.39642300  |
| C | -0.48382200 | -2.05853300 | 1.32402400  |
| F | -0.01295900 | -1.46013400 | 2.44111500  |
| C | -0.05193500 | -3.36703600 | 1.13604900  |
| F | 0.73411300  | -3.95795400 | 2.03960700  |
| C | -0.36900100 | -4.02655100 | -0.03855400 |
| F | 0.09790100  | -5.25001000 | -0.26499000 |
| C | -1.12340700 | -3.36962400 | -1.00375600 |
| F | -1.41765300 | -3.98467400 | -2.14552700 |
| C | -1.53116800 | -2.06555900 | -0.76888700 |
| F | -2.21165200 | -1.46531500 | -1.75174400 |
| H | -0.07516100 | 0.68120000  | 1.53690700  |
| C | -1.36071200 | 0.98257700  | 2.07183300  |
| H | -1.67021900 | 2.00879300  | 1.85961400  |
| C | -3.58665300 | 0.64868100  | 3.16441600  |
| H | -3.95377300 | 1.59659900  | 2.77782100  |
| C | -2.35625100 | 0.21879200  | 2.90318800  |
| H | -2.01665200 | -0.73299800 | 3.30036900  |
| H | -4.26831100 | 0.06273700  | 3.77128100  |
| H | -0.50534800 | 1.11906900  | 2.76769800  |

**P16\_P**

|   |             |             |             |
|---|-------------|-------------|-------------|
| C | -1.01966600 | -1.96061500 | -2.44260300 |
| H | -1.79177700 | -1.18788100 | -2.46513800 |
| H | -1.47806700 | -2.90868300 | -2.13731300 |
| H | -0.65847400 | -2.09162200 | -3.46367900 |
| C | 0.12562300  | -1.58994400 | -1.54024600 |
| H | 1.11888400  | -1.81643100 | -1.92825100 |
| C | 0.12233500  | -0.99774800 | -0.33539800 |
| P | -1.39479600 | -0.60627600 | 0.48543100  |
| C | -2.91366200 | -1.51479600 | 0.08704700  |
| C | -3.86346100 | -1.08528400 | -0.83609700 |
| F | -3.67223900 | 0.04214600  | -1.51705000 |
| C | -5.00618100 | -1.82329900 | -1.09995100 |
| F | -5.89514000 | -1.39952800 | -1.98543900 |
| C | -5.21381200 | -3.02192300 | -0.42439700 |
| F | -6.30049600 | -3.73079600 | -0.66788900 |
| C | -4.28174000 | -3.47995700 | 0.50002000  |
| F | -4.48459700 | -4.62160400 | 1.13831200  |
| C | -3.14550500 | -2.72224000 | 0.74556800  |
| F | -2.25918900 | -3.16921200 | 1.63029300  |

|   |             |             |             |        |             |             |             |
|---|-------------|-------------|-------------|--------|-------------|-------------|-------------|
| C | -1.71820000 | 1.16415700  | 0.47194100  | P19_TS |             |             |             |
| C | -1.87276700 | 1.86257500  | 1.66720300  | P      | 1.22957900  | 0.60329500  | -0.11286900 |
| F | -1.96973800 | 1.20066300  | 2.81697500  | B      | -1.76901600 | 0.39093400  | -0.01426600 |
| C | -1.89980800 | 3.24945300  | 1.69517300  | C      | 0.32852600  | 0.57737100  | -1.72109800 |
| F | -2.03357700 | 3.89910300  | 2.83986600  | H      | 0.22965100  | -0.48098500 | -1.98045200 |
| C | -1.77323100 | 3.95247600  | 0.50372300  | C      | -1.03956000 | 1.14453500  | -1.29797500 |
| F | -1.77682700 | 5.27029000  | 0.51568000  | H      | -1.70568700 | 1.08175700  | -2.16673600 |
| C | -1.62012000 | 3.27848800  | -0.70579800 | H      | -0.92294700 | 2.21724500  | -1.09117000 |
| F | -1.45196300 | 3.96534300  | -1.82614700 | C      | 0.99810700  | 1.32079300  | -2.87065600 |
| C | -1.58046300 | 1.89596300  | -0.70940400 | H      | 0.34800800  | 1.26872800  | -3.74838900 |
| F | -1.37786300 | 1.26427600  | -1.86134100 | H      | 1.96505100  | 0.88451700  | -3.13120000 |
| B | 1.46200700  | -0.45232700 | 0.52347900  | H      | 1.13822000  | 2.37921500  | -2.62897500 |
| C | 2.73459600  | -1.36829000 | 0.05993400  | C      | 2.36518900  | 2.02396600  | -0.13093700 |
| C | 3.99369800  | -0.88213000 | -0.27772000 | C      | 3.56856500  | 2.01376900  | -0.83543400 |
| F | 4.22124400  | 0.43607600  | -0.36909500 | C      | 4.42064400  | 3.10717600  | -0.83989400 |
| C | 5.09285200  | -1.69698800 | -0.52480800 | C      | 4.06109700  | 4.25178300  | -0.13498600 |
| F | 6.27280800  | -1.16574300 | -0.84538400 | C      | 2.86198100  | 4.29918700  | 0.56486800  |
| C | 4.96177600  | -3.07301200 | -0.42730500 | C      | 2.03165700  | 3.18640200  | 0.55840600  |
| F | 6.00347800  | -3.86921400 | -0.65811200 | C      | 2.28991200  | -0.84919500 | 0.12511300  |
| C | 3.73047300  | -3.61045800 | -0.08427500 | C      | 2.67237300  | -1.72183300 | -0.88973400 |
| F | 3.58579700  | -4.93294600 | 0.02173200  | C      | 3.33088900  | -2.91144900 | -0.61226000 |
| C | 2.66130300  | -2.75733700 | 0.15311100  | C      | 3.63637600  | -3.23152700 | 0.70586200  |
| F | 1.50415500  | -3.35328800 | 0.50354200  | C      | 3.29616600  | -2.36444000 | 1.73758200  |
| C | 1.57717800  | 1.13653700  | 0.07782400  | C      | 2.63300300  | -1.18692900 | 1.43361300  |
| C | 1.32274100  | 2.23991400  | 0.88637200  | C      | -1.39249700 | -1.20852200 | -0.05021100 |
| F | 1.00723700  | 2.10316400  | 2.19169200  | C      | -1.81335500 | -1.95211000 | -1.15607900 |
| C | 1.30170700  | 3.55335000  | 0.42564700  | C      | -1.47431400 | -3.27608100 | -1.38151800 |
| F | 0.96273500  | 4.55027000  | 1.25173500  | C      | -0.65594400 | -3.93390600 | -0.46827800 |
| C | 1.52185300  | 3.81706100  | -0.91520300 | C      | -0.21274600 | -3.24859600 | 0.64783100  |
| F | 1.45450500  | 5.06108500  | -1.37983300 | C      | -0.59752100 | -1.92317500 | 0.83531900  |
| C | 1.78912400  | 2.75477900  | -1.76948200 | C      | -3.37182000 | 0.68912900  | -0.07483100 |
| F | 2.00404200  | 2.98320600  | -3.06368300 | C      | -3.84662400 | 1.97946200  | -0.29932100 |
| C | 1.81001300  | 1.46446100  | -1.25969600 | C      | -5.19240700 | 2.31958500  | -0.33865000 |
| F | 2.07747600  | 0.49171600  | -2.14334600 | C      | -6.14581400 | 1.33071400  | -0.14984700 |
| H | -1.25726400 | -0.90339900 | 1.83754200  | C      | -5.72900300 | 0.03021900  | 0.08725800  |
| C | 1.30310900  | -0.68090900 | 2.15154400  | C      | -4.37070400 | -0.25984600 | 0.12896700  |
| H | 1.07150300  | -1.74206600 | 2.31980000  | F      | 3.92373400  | 0.93693300  | -1.53694300 |
| C | 3.44195400  | -1.21557000 | 3.35770500  | F      | 5.56463700  | 3.07493600  | -1.50987600 |
| H | 3.27174400  | -2.28612300 | 3.26497100  | F      | 4.86402400  | 5.30247200  | -0.13679800 |
| C | 2.56297000  | -0.33351700 | 2.88733000  | F      | 2.52371200  | 5.39601600  | 1.22779700  |
| H | 2.77430300  | 0.72971300  | 2.99585300  | F      | 0.88335900  | 3.25340000  | 1.23186100  |
| H | 4.35877700  | -0.90251500 | 3.84621600  | F      | 2.40936400  | -1.43518400 | -2.16379100 |
| H | 0.48751000  | -0.09144300 | 2.59201400  | F      | 3.68244400  | -3.73337100 | -1.59235700 |
|   |             |             |             | F      | 4.26636900  | -4.36137800 | 0.97835900  |

|              |             |             |             |   |             |             |             |
|--------------|-------------|-------------|-------------|---|-------------|-------------|-------------|
| F            | 3.60155500  | -2.67082800 | 2.99014600  | C | 4.93951700  | 1.42422800  | 0.32227700  |
| F            | 2.31157700  | -0.35982900 | 2.42710900  | H | 5.50153800  | 2.30296300  | -0.01799300 |
| F            | -2.58664500 | -1.36432800 | -2.07929500 | H | 4.55071900  | 1.67252100  | 1.31942900  |
| F            | -1.91110000 | -3.92107100 | -2.45971900 | C | 3.75106300  | 1.25274900  | -0.64392700 |
| F            | -0.30088600 | -5.19799400 | -0.67099300 | C | 2.79920400  | 2.44466100  | -0.49493600 |
| F            | 0.59703000  | -3.84586700 | 1.52670700  | H | 2.47278300  | 2.57417000  | 0.54066800  |
| F            | -0.07874900 | -1.33656300 | 1.93839200  | H | 1.91253800  | 2.34083300  | -1.12928100 |
| F            | -2.98305000 | 3.00254700  | -0.45322800 | H | 3.32552700  | 3.35490700  | -0.80192800 |
| F            | -5.57109100 | 3.57962700  | -0.55271000 | C | 4.21982700  | 1.17252600  | -2.10398800 |
| F            | -7.44145300 | 1.62816700  | -0.19092800 | H | 3.37360300  | 1.09628600  | -2.79251400 |
| F            | -6.63205100 | -0.92934600 | 0.28662800  | H | 4.89947300  | 0.34106500  | -2.29933600 |
| F            | -4.06361000 | -1.53323700 | 0.40942300  | H | 4.75385400  | 2.09811700  | -2.34236200 |
| H            | -0.17129700 | 0.75022300  | 0.87069300  | C | 4.57124800  | -2.29486300 | -1.00542900 |
| C            | -1.38370400 | 1.14447500  | 1.61550600  | H | 3.78116300  | -2.83178300 | -1.53423300 |
| H            | -1.73201300 | 2.15971500  | 1.40312800  | H | 5.32439900  | -3.02954500 | -0.70171900 |
| H            | -0.42891100 | 1.31470200  | 2.14787400  | H | 5.04941000  | -1.60111400 | -1.69954500 |
| C            | -3.39396000 | 0.92379000  | 3.09246500  | C | 3.34351100  | -2.69677600 | 1.13458600  |
| H            | -3.80044200 | 1.86848200  | 2.73841500  | H | 3.01279300  | -2.27433100 | 2.08424300  |
| C            | -2.24246500 | 0.44351300  | 2.63285000  | H | 4.08899200  | -3.47170400 | 1.34565600  |
| H            | -1.87029000 | -0.50552400 | 3.00649900  | H | 2.48938800  | -3.16702400 | 0.64178700  |
| H            | -3.97278900 | 0.38236600  | 3.83305200  | C | -2.49882800 | -0.60392300 | 0.44358000  |
| <b>P19_P</b> |             |             |             | C | -3.39327000 | 0.12836200  | 1.22545200  |
| B            | -0.85552300 | -0.52768500 | 0.73852600  | F | -2.94190000 | 0.92469400  | 2.21121700  |
| C            | -0.15799100 | -1.84135400 | 0.02006300  | C | -4.77124900 | 0.12776100  | 1.05047000  |
| C            | -0.66996600 | -3.07482500 | 0.47483300  | F | -5.56208700 | 0.84538300  | 1.85216100  |
| H            | -1.40734600 | -3.05627500 | 1.27486300  | C | -5.32477200 | -0.62201300 | 0.02470300  |
| C            | -0.32666800 | -4.30286500 | -0.06959500 | F | -6.64380700 | -0.64001900 | -0.16509100 |
| H            | -0.76569000 | -5.21435300 | 0.32451600  | C | -4.48304400 | -1.34057700 | -0.80778000 |
| C            | 0.54994700  | -4.35577300 | -1.15199000 | F | -4.99632200 | -2.04979500 | -1.81608700 |
| H            | 0.79259200  | -5.29873600 | -1.63078600 | C | -3.10820800 | -1.30922400 | -0.59621300 |
| C            | 1.11094600  | -3.17279400 | -1.60384400 | F | -2.38849400 | -2.00524000 | -1.48793600 |
| H            | 1.79794800  | -3.19520300 | -2.44763800 | C | -0.50159600 | 0.99306800  | 0.14105100  |
| C            | 0.80347900  | -1.94067900 | -1.00382400 | C | -0.91071500 | 1.33335700  | -1.15323700 |
| C            | 1.63628400  | -0.76132700 | -1.46911600 | F | -1.27993300 | 0.35784600  | -1.99954000 |
| H            | 1.05227600  | 0.12616200  | -1.71791800 | C | -0.94788200 | 2.62382600  | -1.66146800 |
| H            | 2.23250900  | -1.02913100 | -2.34842200 | F | -1.35402100 | 2.86128700  | -2.90878500 |
| C            | 4.02181400  | -1.62746000 | 0.26310800  | C | -0.56078700 | 3.68211600  | -0.84649300 |
| C            | 5.15436900  | -0.97704600 | 1.09122500  | F | -0.57849500 | 4.92992500  | -1.30909900 |
| H            | 4.74175800  | -0.66028100 | 2.05952000  | C | -0.11842300 | 3.40748300  | 0.43476500  |
| H            | 5.87385600  | -1.77614700 | 1.30820600  | F | 0.34946800  | 4.39347700  | 1.20412800  |
| C            | 5.86230000  | 0.21255900  | 0.44435900  | C | -0.08303600 | 2.09004400  | 0.88644900  |
| H            | 6.27295800  | -0.06467400 | -0.53384100 | F | 0.47841400  | 1.93692500  | 2.10115500  |
| H            | 6.72018200  | 0.48779100  | 1.06473400  | H | 2.11072500  | 0.01376900  | 1.01073500  |
|              |             |             |             | P | 2.82350300  | -0.27911800 | -0.16900600 |

|               |             |             |             |   |             |             |             |
|---------------|-------------|-------------|-------------|---|-------------|-------------|-------------|
| C             | -0.63154500 | -0.63974100 | 2.38832500  | C | 3.61856700  | 1.61115100  | 0.60520800  |
| H             | -1.37175600 | -1.37248900 | 2.74111500  | F | 4.50556300  | 0.67775100  | 0.98115800  |
| C             | 1.61367300  | -0.43506200 | 3.54629200  | F | 5.23023800  | 3.23572700  | 1.20229500  |
| H             | 1.43478500  | 0.59159300  | 3.85120500  | C | -2.67096300 | 1.57496300  | -0.43580200 |
| C             | 0.70267700  | -1.12442200 | 2.85068100  | C | -2.61469700 | 1.79663600  | -1.83314700 |
| H             | 0.93468500  | -2.15895000 | 2.58840700  | C | -2.86556700 | 0.70629400  | -2.84783200 |
| H             | 2.54711400  | -0.89022600 | 3.87179400  | C | -2.33562400 | 3.07616400  | -2.30746800 |
| H             | -0.87438300 | 0.29454700  | 2.89170200  | C | -2.09894600 | 4.14618200  | -1.44968000 |
| <b>P20_TS</b> |             |             |             | C | -1.71443600 | 5.49960600  | -1.98178000 |
| P             | -2.70554700 | -0.19425600 | 0.04195700  | C | -2.19801400 | 3.91433800  | -0.08229500 |
| C             | -2.77845000 | -0.49725200 | 1.84488700  | C | -2.47927000 | 2.65541500  | 0.45062500  |
| C             | -3.82231200 | -0.99124900 | 2.63227800  | C | -2.53464900 | 2.54938500  | 1.95555500  |
| C             | -3.56136400 | -1.45845000 | 3.92929900  | C | -4.22272800 | -0.99119900 | -0.58488600 |
| C             | -2.26869900 | -1.52665600 | 4.45660800  | C | -4.08116800 | -2.27397800 | -1.15084500 |
| C             | -1.19916800 | -1.07320700 | 3.67974800  | C | -2.74537500 | -2.97710900 | -1.22243000 |
| C             | -1.52964300 | -0.51916600 | 2.44003500  | C | -5.21273300 | -2.91479000 | -1.65172600 |
| O             | -0.43925700 | -0.14332800 | 1.74012200  | C | -6.47282100 | -2.32145900 | -1.60672900 |
| C             | 0.64985000  | -0.64402100 | 2.41638000  | C | -7.67679400 | -3.01724400 | -2.18483700 |
| C             | 0.26712800  | -1.14661800 | 3.66750400  | C | -6.58992200 | -1.05985000 | -1.02595300 |
| C             | 1.27528000  | -1.69715500 | 4.46228000  | C | -5.48791900 | -0.37712200 | -0.51065400 |
| C             | 2.56155800  | -1.74807800 | 3.93036600  | C | -5.69738800 | 0.98950500  | 0.09460700  |
| C             | 2.84816100  | -1.32375900 | 2.62216500  | H | -4.82809000 | -1.05442700 | 2.22613200  |
| C             | 1.87429700  | -0.76706100 | 1.78419000  | H | -4.38961200 | -1.82954600 | 4.52346000  |
| B             | 2.02911100  | -0.39000500 | 0.20053800  | H | -2.10417100 | -1.96892400 | 5.43375900  |
| C             | 3.08587500  | -1.37562800 | -0.54054400 | H | 1.06354200  | -2.10333500 | 5.44587100  |
| C             | 4.09404100  | -0.98301500 | -1.41760400 | H | 3.35993800  | -2.17812800 | 4.52663100  |
| F             | 4.29091200  | 0.30789000  | -1.71096600 | H | 3.85234500  | -1.46804300 | 2.23273300  |
| C             | 4.94875500  | -1.87881600 | -2.05118400 | H | -2.59234800 | 1.05568000  | -3.84563700 |
| F             | 5.90142900  | -1.44017000 | -2.87411400 | H | -2.26865900 | -0.19066100 | -2.64962500 |
| C             | 4.80285900  | -3.23942900 | -1.83263200 | H | -3.91870200 | 0.40769800  | -2.86426100 |
| F             | 5.60703400  | -4.10955600 | -2.43843400 | H | -2.29047800 | 3.23453300  | -3.38258200 |
| C             | 3.79919700  | -3.68510600 | -0.98471900 | H | -2.06144700 | 6.29874700  | -1.32254600 |
| C             | 2.97273100  | -2.75604500 | -0.36890300 | H | -0.62498600 | 5.57574600  | -2.04960700 |
| F             | 1.99110600  | -3.25894100 | 0.40086500  | H | -2.12814900 | 5.66787700  | -2.97882500 |
| F             | 3.63260900  | -4.99228700 | -0.77860200 | H | -2.03506800 | 4.74098200  | 0.60528500  |
| C             | 2.37286200  | 1.21030000  | 0.11748000  | H | -2.61539700 | 3.54830600  | 2.38838900  |
| C             | 1.54086000  | 2.26742200  | -0.22874300 | H | -1.62468100 | 2.09072400  | 2.35466000  |
| F             | 0.29013600  | 2.06025100  | -0.69989400 | H | -3.38306500 | 1.95968000  | 2.30766200  |
| C             | 1.89478400  | 3.60820400  | -0.11449200 | H | -2.86688300 | -3.98036300 | -1.63473200 |
| F             | 1.02685300  | 4.56656700  | -0.45641500 | H | -2.28861900 | -3.07491200 | -0.23162100 |
| C             | 3.14571200  | 3.94546400  | 0.36877300  | H | -2.03293000 | -2.43601200 | -1.85685700 |
| F             | 3.50305300  | 5.22153400  | 0.49272600  | H | -5.10678100 | -3.90601100 | -2.08591300 |
| C             | 4.02239700  | 2.93005100  | 0.73041800  | H | -7.82741300 | -2.72299000 | -3.22871100 |
|               |             |             |             | H | -8.58471300 | -2.75830400 | -1.63515300 |

|              |             |             |             |   |             |             |             |
|--------------|-------------|-------------|-------------|---|-------------|-------------|-------------|
| H            | -7.55652300 | -4.10256900 | -2.16112700 | F | -0.21775000 | 1.07527800  | -1.05174800 |
| H            | -7.57013900 | -0.59203100 | -0.96586400 | C | 0.41583200  | 3.13359600  | -0.22800800 |
| H            | -6.75740800 | 1.15396800  | 0.29796000  | F | -0.74757900 | 3.61953900  | -0.68559700 |
| H            | -5.14829000 | 1.10891700  | 1.03372400  | C | 1.30159000  | 3.96824000  | 0.42791300  |
| H            | -5.35045900 | 1.77927100  | -0.57904900 | F | 1.01086900  | 5.25878600  | 0.60704600  |
| H            | -0.95825600 | -0.65576900 | -0.47080600 | C | 2.49614700  | 3.43815300  | 0.89826400  |
| C            | 0.44717800  | -0.80806400 | -0.66575600 | C | 2.76553800  | 2.09291400  | 0.69903700  |
| H            | 0.10872200  | 0.16379700  | -0.30486400 | F | 3.92953800  | 1.64701100  | 1.19349200  |
| H            | 0.27700000  | -1.71044800 | -0.07885800 | F | 3.36105500  | 4.22588400  | 1.54027500  |
| C            | 0.44771600  | -0.01084800 | -3.03918700 | C | -3.25393400 | 1.34460700  | -0.43858400 |
| H            | 0.11272700  | 0.98321300  | -2.75362100 | C | -3.10467500 | 1.63627800  | -1.81439600 |
| C            | 0.63192600  | -0.96929300 | -2.13064900 | C | -2.67740600 | 0.60665000  | -2.83296000 |
| H            | 0.98192600  | -1.94887900 | -2.45328600 | C | -3.33108900 | 2.94123000  | -2.23987700 |
| H            | 0.63988700  | -0.19267500 | -4.09088400 | C | -3.66956600 | 3.95740600  | -1.35035900 |
| <b>P20_P</b> |             |             |             | C | -3.81662900 | 5.37647900  | -1.82406300 |
| P            | -2.92725800 | -0.37444600 | 0.00622500  | C | -3.80336100 | 3.63907100  | -0.00127800 |
| C            | -2.66383200 | -0.78211600 | 1.73038300  | C | -3.59762200 | 2.35078600  | 0.48608300  |
| C            | -3.65523800 | -1.13929800 | 2.65488000  | C | -3.73760100 | 2.12988700  | 1.97240000  |
| C            | -3.30098200 | -1.49231700 | 3.95526000  | C | -4.08764900 | -1.56846300 | -0.69518900 |
| C            | -1.96293000 | -1.53886500 | 4.36568500  | C | -3.54050200 | -2.78784300 | -1.15855200 |
| C            | -0.95718600 | -1.23730000 | 3.45248300  | C | -2.06389400 | -3.10729300 | -1.09703900 |
| C            | -1.34388800 | -0.85840800 | 2.15312600  | C | -4.41300000 | -3.72613100 | -1.70174700 |
| O            | -0.29365500 | -0.63490400 | 1.35032200  | C | -5.78653200 | -3.49588800 | -1.79333600 |
| C            | 0.84893400  | -0.90383900 | 2.10182900  | C | -6.69098700 | -4.53621000 | -2.39759100 |
| C            | 0.49722400  | -1.23985500 | 3.41585400  | C | -6.29243100 | -2.29019400 | -1.31472600 |
| C            | 1.52404800  | -1.49490800 | 4.32853400  | C | -5.46757100 | -1.31006900 | -0.76249600 |
| C            | 2.82705000  | -1.38892200 | 3.86115000  | C | -6.09408000 | -0.02364500 | -0.27916800 |
| C            | 3.11029400  | -1.07029700 | 2.52188600  | H | -4.69994600 | -1.14763600 | 2.35567100  |
| C            | 2.12318100  | -0.83699300 | 1.55634100  | H | -4.08209100 | -1.75437000 | 4.66017900  |
| B            | 2.32179500  | -0.40403200 | -0.01700700 | H | -1.71663500 | -1.83197100 | 5.38120900  |
| C            | 3.85871800  | -0.64373300 | -0.54827000 | H | 1.31196200  | -1.75713300 | 5.35989200  |
| C            | 4.52967500  | 0.23110700  | -1.39989800 | H | 3.65161900  | -1.56444500 | 4.54467900  |
| F            | 3.97149000  | 1.39951100  | -1.76301000 | H | 4.15101600  | -1.00458300 | 2.21817400  |
| C            | 5.78227100  | -0.02013100 | -1.94560400 | H | -2.71104600 | 1.03842700  | -3.83400100 |
| F            | 6.36703200  | 0.87017300  | -2.75262000 | H | -1.64475100 | 0.28903700  | -2.64921100 |
| C            | 6.42727700  | -1.21150400 | -1.65384100 | H | -3.31921500 | -0.27986300 | -2.83366000 |
| F            | 7.62747800  | -1.47694800 | -2.17227800 | H | -3.21221400 | 3.17327300  | -3.29500900 |
| C            | 5.80138300  | -2.12662000 | -0.82344000 | H | -4.51050200 | 5.93897500  | -1.19568800 |
| C            | 4.54727500  | -1.83113400 | -0.30185500 | H | -2.84367600 | 5.87704100  | -1.77862000 |
| F            | 4.01354400  | -2.78123300 | 0.48495100  | H | -4.16591600 | 5.41902900  | -2.85792700 |
| F            | 6.40406400  | -3.28478100 | -0.53843700 | H | -4.05802700 | 4.42575300  | 0.70408200  |
| C            | 1.91834600  | 1.20585300  | 0.03135900  | H | -4.03291900 | 3.06318900  | 2.45397400  |
| C            | 0.73902400  | 1.79156200  | -0.40595000 | H | -2.79789600 | 1.80041000  | 2.42347900  |
|              |             |             |             | H | -4.49241500 | 1.37730600  | 2.21750900  |

|               |             |             |             |   |             |             |             |
|---------------|-------------|-------------|-------------|---|-------------|-------------|-------------|
| H             | -1.89254300 | -4.14999500 | -1.36652300 | F | 0.44911500  | -4.19786800 | -0.78526200 |
| H             | -1.63890100 | -2.95519600 | -0.09852700 | C | 0.52892200  | -2.58893600 | -2.50473600 |
| H             | -1.47729300 | -2.49603000 | -1.79358100 | F | 0.14433400  | -3.49721900 | -3.40128100 |
| H             | -4.00753600 | -4.66860100 | -2.06140100 | C | 0.73708600  | -1.27363100 | -2.88154300 |
| H             | -6.47268800 | -4.66414000 | -3.46207900 | C | 1.13395700  | -0.33579200 | -1.93418800 |
| H             | -7.74171600 | -4.25805100 | -2.29791500 | F | 1.35484300  | 0.89724500  | -2.41081900 |
| H             | -6.54452500 | -5.50664300 | -1.91569600 | F | 0.52331300  | -0.90643100 | -4.14643800 |
| H             | -7.36181800 | -2.10303900 | -1.36839000 | C | 3.38110200  | -0.32796800 | 0.89053400  |
| H             | -7.17163800 | -0.15394800 | -0.16448300 | C | 4.33874100  | -0.27055700 | -0.12642100 |
| H             | -5.69606800 | 0.29814700  | 0.68829800  | F | 4.05236900  | 0.36932300  | -1.27023700 |
| H             | -5.92261300 | 0.79580200  | -0.98459900 | C | 5.59469400  | -0.85385700 | -0.04845500 |
| H             | -1.69371100 | -0.64603500 | -0.58784300 | F | 6.46336400  | -0.74612900 | -1.05393600 |
| C             | 1.35093600  | -1.26794700 | -1.05032400 | C | 5.93818500  | -1.57253500 | 1.08838100  |
| H             | 1.49814400  | -0.89549500 | -2.07378500 | F | 7.13478400  | -2.14716000 | 1.18624800  |
| H             | 0.30246300  | -1.08687900 | -0.79720900 | C | 5.01343400  | -1.69377200 | 2.11106200  |
| C             | 1.95360900  | -3.49862400 | -2.05339700 | C | 3.76520600  | -1.08967800 | 1.98917200  |
| H             | 2.13000300  | -3.05873300 | -3.03234100 | F | 2.92971200  | -1.31640600 | 3.01873700  |
| C             | 1.57379700  | -2.74573800 | -1.02117400 | F | 5.31640300  | -2.39910600 | 3.20208900  |
| H             | 1.43188700  | -3.22790900 | -0.05096900 | C | -3.50859900 | -0.34807400 | 1.55053800  |
| H             | 2.12525600  | -4.56580100 | -1.95335200 | C | -3.34244500 | -0.37584500 | 2.95003500  |
| <b>P21_TS</b> |             |             |             | C | -2.03946200 | 0.00111900  | 3.61225200  |
| P             | -2.03802700 | 0.08995800  | 0.51459600  | C | -4.40518800 | -0.75783200 | 3.76582500  |
| C             | -2.42029800 | 1.83293900  | 0.08777300  | C | -5.64272500 | -1.11449200 | 3.23676600  |
| C             | -3.64441600 | 2.47325700  | 0.30427500  | C | -6.76585800 | -1.56977100 | 4.13035600  |
| C             | -3.76869400 | 3.83784600  | 0.06750000  | C | -5.80381700 | -1.04258800 | 1.85689100  |
| C             | -2.68102000 | 4.57839600  | -0.39339800 | C | -4.76958500 | -0.66283900 | 0.99740000  |
| C             | -1.44334000 | 3.97718300  | -0.61358500 | C | -5.09754200 | -0.59562700 | -0.47736100 |
| C             | -1.34331200 | 2.61320300  | -0.33999500 | C | -2.19194800 | -1.07122700 | -0.90937000 |
| O             | -0.16292600 | 1.95335800  | -0.50848500 | C | -2.31073900 | -0.71064500 | -2.26767600 |
| C             | 1.01162200  | 2.67472000  | -0.31480200 | C | -2.13332100 | 0.69623300  | -2.78193700 |
| C             | 2.09466800  | 1.93295500  | 0.15070100  | C | -2.57372500 | -1.70956400 | -3.20500100 |
| C             | 3.25959600  | 2.67555400  | 0.37656800  | C | -2.70389500 | -3.05169000 | -2.85386100 |
| C             | 3.31689500  | 4.04885800  | 0.15358100  | C | -2.95441100 | -4.10495200 | -3.89870800 |
| C             | 2.20319000  | 4.73127800  | -0.32539200 | C | -2.50676300 | -3.39433400 | -1.52039400 |
| C             | 1.01804500  | 4.04328000  | -0.58115900 | C | -2.23542200 | -2.43433300 | -0.54392100 |
| C             | -0.22290600 | 4.65996200  | -1.21934200 | C | -1.97871400 | -2.93082700 | 0.86155300  |
| C             | -0.27470900 | 6.17783700  | -1.04900900 | H | -4.49260000 | 1.90807600  | 0.67661200  |
| C             | -0.19187700 | 4.31817200  | -2.72697500 | H | -4.72044300 | 4.32864300  | 0.23985300  |
| B             | 1.92483000  | 0.36592700  | 0.55921700  | H | -2.80590500 | 5.63932900  | -0.58275600 |
| C             | 1.29810100  | -0.63532800 | -0.58444600 | H | 4.14098700  | 2.17159000  | 0.76322500  |
| C             | 1.06760100  | -1.97211000 | -0.26087100 | H | 4.23671400  | 4.59041400  | 0.34957900  |
| F             | 1.20985600  | -2.38243800 | 1.01779200  | H | 2.26298800  | 5.79948800  | -0.50365800 |
| C             | 0.69748100  | -2.94467200 | -1.17556900 | H | 0.59789800  | 6.64338200  | -1.51271500 |
|               |             |             |             | H | -0.30466400 | 6.46388700  | 0.00650400  |



|              |             |             |             |   |             |             |             |
|--------------|-------------|-------------|-------------|---|-------------|-------------|-------------|
| H            | -1.15348200 | 6.59104600  | -1.55110000 | O | -0.15065900 | 1.94655700  | -0.40964000 |
| H            | 0.67187000  | 4.79788200  | -3.19716000 | C | 1.04248000  | 2.67647600  | -0.20264000 |
| H            | -0.10162500 | 3.23852600  | -2.87921500 | C | 2.13644700  | 1.94394900  | 0.25621000  |
| H            | -1.10634100 | 4.66971400  | -3.21582400 | C | 3.28538000  | 2.70924900  | 0.49133500  |
| H            | -2.13868500 | -0.02314000 | 4.69891800  | C | 3.32672700  | 4.08447400  | 0.28197000  |
| H            | -1.23575100 | -0.69036400 | 3.33831000  | C | 2.20995200  | 4.75197900  | -0.20666400 |
| H            | -1.73028100 | 1.01859300  | 3.34046000  | C | 1.03852000  | 4.04392000  | -0.47315700 |
| H            | -4.26084000 | -0.77595600 | 4.84356800  | C | -0.18784700 | 4.65292400  | -1.14297200 |
| H            | -6.73299000 | -1.06203300 | 5.09731600  | C | -0.24970500 | 6.17270400  | -0.99449100 |
| H            | -7.73919400 | -1.37897700 | 3.67281100  | C | -0.12615600 | 4.29274700  | -2.64601300 |
| H            | -6.69427500 | -2.64570900 | 4.32043200  | B | 2.01090600  | 0.37397200  | 0.69107500  |
| H            | -6.77348200 | -1.28138200 | 1.42524200  | C | 1.31851500  | -0.59800500 | -0.47149000 |
| H            | -6.17434400 | -0.46044200 | -0.60365700 | C | 1.04764800  | -1.93576800 | -0.17438800 |
| H            | -4.80697400 | -1.51405900 | -0.99741900 | F | 1.18139100  | -2.38772800 | 1.08853700  |
| H            | -4.59193900 | 0.23299300  | -0.97834300 | C | 0.66282500  | -2.88801200 | -1.10785800 |
| H            | -2.14805700 | 0.69359500  | -3.87340400 | F | 0.38754300  | -4.14505600 | -0.73692400 |
| H            | -1.16998400 | 1.10541200  | -2.46355800 | C | 0.50990200  | -2.51601200 | -2.43323800 |
| H            | -2.91820200 | 1.37394300  | -2.43208900 | F | 0.11417300  | -3.40739100 | -3.34689800 |
| H            | -2.66392600 | -1.42584800 | -4.25099300 | C | 0.73874200  | -1.19786300 | -2.78591800 |
| H            | -2.00142300 | -4.46221300 | -4.30054700 | C | 1.15499400  | -0.28482600 | -1.82148300 |
| H            | -3.54118100 | -3.70748700 | -4.73017700 | F | 1.39605100  | 0.94828700  | -2.29490600 |
| H            | -3.48433400 | -4.96292500 | -3.47848900 | F | 0.52767900  | -0.80534500 | -4.04685000 |
| H            | -2.53661600 | -4.44113000 | -1.22615300 | C | 3.48868200  | -0.33164600 | 0.86531000  |
| H            | -1.54959400 | -3.93404000 | 0.81741000  | C | 4.42544500  | -0.22355300 | -0.16340000 |
| H            | -1.26198800 | -2.30065800 | 1.39812800  | F | 4.12310000  | 0.48688800  | -1.26354800 |
| H            | -2.89809200 | -2.96944300 | 1.45457500  | C | 5.67357900  | -0.82905100 | -0.14687800 |
| H            | -0.12642900 | 0.38153800  | 1.25618600  | F | 6.53075900  | -0.67270900 | -1.15949900 |
| C            | 0.99175700  | 0.36681000  | 2.02549100  | C | 6.02159600  | -1.62671800 | 0.93433300  |
| H            | 0.92403100  | -0.62272300 | 2.47378200  | F | 7.21214100  | -2.22617000 | 0.97243000  |
| H            | -0.04963500 | 0.79492600  | 2.21800600  | C | 5.11164200  | -1.80465100 | 1.96295500  |
| C            | 1.87670900  | 1.08639300  | 4.25849200  | C | 3.87213500  | -1.17321100 | 1.90544700  |
| H            | 1.73343200  | 0.09070400  | 4.66561600  | F | 3.04191000  | -1.45491800 | 2.91943800  |
| C            | 1.57806700  | 1.38072400  | 2.99742100  | F | 5.42535600  | -2.59612200 | 2.99257400  |
| H            | 1.74033800  | 2.37893000  | 2.60308700  | C | -3.63761900 | -0.36018200 | 1.51522300  |
| H            | 2.30988100  | 1.83628100  | 4.91176000  | C | -3.39251600 | -0.36094800 | 2.90428100  |
|              |             |             |             | C | -2.07364200 | 0.05964600  | 3.50443000  |
|              |             |             |             | C | -4.41859800 | -0.76677200 | 3.75487300  |
|              |             |             |             | C | -5.66793100 | -1.15455100 | 3.27461300  |
|              |             |             |             | C | -6.74300200 | -1.62695100 | 4.21606300  |
|              |             |             |             | C | -5.89362100 | -1.09842200 | 1.90108400  |
|              |             |             |             | C | -4.90382500 | -0.70681300 | 1.00037400  |
|              |             |             |             | C | -5.26253600 | -0.66772000 | -0.46894100 |
|              |             |             |             | C | -2.28992400 | -1.05283400 | -1.00117000 |
|              |             |             |             | C | -2.37096400 | -0.65118400 | -2.35018500 |
| <b>P21_P</b> |             |             |             |   |             |             |             |
| P            | -2.28218000 | 0.09294000  | 0.39943000  |   |             |             |             |
| C            | -2.44206300 | 1.85784800  | 0.09268500  |   |             |             |             |
| C            | -3.67719700 | 2.49811800  | 0.25924600  |   |             |             |             |
| C            | -3.77882500 | 3.86062800  | 0.03003600  |   |             |             |             |
| C            | -2.65725400 | 4.58277400  | -0.38292600 |   |             |             |             |
| C            | -1.41831200 | 3.97539400  | -0.55928800 |   |             |             |             |
| C            | -1.31810400 | 2.60563800  | -0.28348700 |   |             |             |             |

|   |             |             |             |               |             |             |             |
|---|-------------|-------------|-------------|---------------|-------------|-------------|-------------|
| C | -2.16027600 | 0.76689100  | -2.81917400 | H             | 0.21037700  | 0.97724900  | 1.83331000  |
| C | -2.59309900 | -1.63516900 | -3.31133800 | C             | 1.93179100  | 0.76528200  | 4.45864000  |
| C | -2.71629600 | -2.98497800 | -2.98476400 | H             | 1.65554600  | -0.24498000 | 4.74975400  |
| C | -2.91959700 | -4.02008200 | -4.05576000 | C             | 1.74998500  | 1.20030900  | 3.21319300  |
| C | -2.54817500 | -3.35876500 | -1.65392900 | H             | 2.06174800  | 2.21585500  | 2.96429600  |
| C | -2.32052300 | -2.42109500 | -0.64821800 | H             | 2.38702200  | 1.39124400  | 5.21990700  |
| C | -2.08380100 | -2.93639200 | 0.75395000  |               |             |             |             |
| H | -4.54267000 | 1.93219900  | 0.58822300  | <b>P22_TS</b> |             |             |             |
| H | -4.72921000 | 4.36335400  | 0.16769700  | P             | 2.09926700  | 1.25434900  | 1.35013500  |
| H | -2.76036300 | 5.64518800  | -0.57671100 | C             | 3.30894700  | -0.02374700 | 0.88961000  |
| H | 4.17198200  | 2.20950300  | 0.87267600  | C             | 4.58239800  | -0.21843900 | 1.42856500  |
| H | 4.23673200  | 4.63813800  | 0.49084100  | C             | 5.34278500  | -1.31334900 | 1.02755700  |
| H | 2.25565000  | 5.82041800  | -0.38551600 | C             | 4.84875700  | -2.20704200 | 0.07576200  |
| H | 0.63469100  | 6.63175200  | -1.44068200 | C             | 3.59210000  | -2.02923100 | -0.50188400 |
| H | -0.30601400 | 6.47301500  | 0.05592800  | C             | 2.84708400  | -0.93701800 | -0.06292800 |
| H | -1.11390600 | 6.57900100  | -1.52731800 | O             | 1.59682800  | -0.70909100 | -0.55438400 |
| H | 0.74354300  | 4.77564800  | -3.10104500 | C             | 0.83243200  | -1.81806100 | -0.88946800 |
| H | -0.01544800 | 3.21295500  | -2.78247800 | C             | -0.53790400 | -1.71149900 | -0.64316900 |
| H | -1.03247500 | 4.62899200  | -3.16116800 | C             | -1.29094100 | -2.81877400 | -1.05014500 |
| H | -2.16063700 | 0.13465600  | 4.58910400  | C             | -0.69787000 | -3.95870000 | -1.58559200 |
| H | -1.27419600 | -0.65796300 | 3.28998800  | C             | 0.68264200  | -4.02837400 | -1.74552600 |
| H | -1.73719800 | 1.03377900  | 3.13403600  | C             | 1.48116700  | -2.93651300 | -1.40909300 |
| H | -4.23469800 | -0.77310500 | 4.82617300  | C             | 2.99250900  | -2.86286000 | -1.63145100 |
| H | -7.73787300 | -1.46323500 | 3.79652800  | C             | 3.24451900  | -2.10262900 | -2.95348600 |
| H | -6.63555600 | -2.69927800 | 4.40901200  | C             | 3.63190800  | -4.24808700 | -1.71612000 |
| H | -6.68163400 | -1.11155100 | 5.17710300  | B             | -1.14258900 | -0.41191700 | 0.10172700  |
| H | -6.87440200 | -1.36275400 | 1.51293100  | C             | -0.81886700 | 0.98922000  | -0.65758600 |
| H | -6.34555500 | -0.57941500 | -0.57635900 | C             | -0.79864000 | 1.05333100  | -2.05170800 |
| H | -4.94221200 | -1.57813900 | -0.98574500 | F             | -0.94430900 | -0.05186800 | -2.78999700 |
| H | -4.80787300 | 0.17819700  | -0.99334400 | C             | -0.68257900 | 2.24216800  | -2.76275800 |
| H | -2.15854300 | 0.79452500  | -3.90975400 | F             | -0.67518900 | 2.23919200  | -4.09495500 |
| H | -1.18859600 | 1.13890900  | -2.47712900 | C             | -0.56362300 | 3.44261100  | -2.07786400 |
| H | -2.93368500 | 1.45401400  | -2.46241400 | F             | -0.40983200 | 4.58643500  | -2.73978700 |
| H | -2.64689900 | -1.33577700 | -4.35478000 | C             | -0.59659400 | 3.43064900  | -0.69261800 |
| H | -3.45415700 | -4.89114000 | -3.67061800 | C             | -0.74081200 | 2.22292800  | -0.02600300 |
| H | -1.94564800 | -4.35719600 | -4.42287900 | F             | -0.81137800 | 2.30295600  | 1.32047400  |
| H | -3.47677100 | -3.61277500 | -4.90218600 | F             | -0.43985100 | 4.56706400  | -0.00530200 |
| H | -2.56095900 | -4.41300600 | -1.38869800 | C             | -2.77080600 | -0.51929000 | 0.37655400  |
| H | -1.66774100 | -3.94345800 | 0.69474400  | C             | -3.72851600 | 0.40330800  | -0.05804800 |
| H | -1.35283000 | -2.33598400 | 1.30632900  | F             | -3.40265600 | 1.51523300  | -0.73340300 |
| H | -3.00816300 | -2.97299800 | 1.33889400  | C             | -5.09751000 | 0.26706100  | 0.16042100  |
| H | -1.08103700 | -0.09536500 | 1.08884700  | F             | -5.93961300 | 1.19848800  | -0.28421100 |
| C | 1.12724900  | 0.42356100  | 2.09191200  | C             | -5.58690300 | -0.83472200 | 0.83801300  |
| H | 0.83521900  | -0.56858500 | 2.45325800  | F             | -6.89056900 | -0.97620300 | 1.05252500  |

|   |             |             |             |              |             |             |             |
|---|-------------|-------------|-------------|--------------|-------------|-------------|-------------|
| C | -4.68833100 | -1.78790000 | 1.29201200  | H            | 1.41951000  | -3.55983500 | 2.33700500  |
| C | -3.33440200 | -1.61106200 | 1.04971800  |              |             |             |             |
| F | -2.54412300 | -2.58909100 | 1.53419700  | <b>P22_P</b> |             |             |             |
| F | -5.12670000 | -2.86236600 | 1.94576000  | P            | 2.76893000  | 1.15185300  | 1.11126500  |
| C | 2.54441300  | 1.85308000  | 3.05005400  | C            | 3.39429300  | -0.48929500 | 0.80462200  |
| C | 2.45304800  | 0.76271900  | 4.11930600  | C            | 4.66369700  | -0.88437300 | 1.24366100  |
| C | 1.63002400  | 3.03444200  | 3.40010600  | C            | 5.14707400  | -2.13614100 | 0.90010100  |
| C | 2.52014200  | 2.70114300  | 0.24726500  | C            | 4.39299600  | -2.95742100 | 0.05868900  |
| C | 3.84803300  | 3.36243500  | 0.62552200  | C            | 3.14274300  | -2.57917100 | -0.42044400 |
| C | 2.55510100  | 2.25458200  | -1.21695100 | C            | 2.61291700  | -1.35955100 | 0.02362800  |
| H | 4.97032800  | 0.46865600  | 2.17582500  | O            | 1.37218800  | -0.95666600 | -0.32179100 |
| H | 6.32657900  | -1.47287100 | 1.45531900  | C            | 0.42403500  | -1.93561800 | -0.69787000 |
| H | 5.46310500  | -3.05066500 | -0.22142300 | C            | -0.92035000 | -1.61757500 | -0.47738900 |
| H | -2.37043100 | -2.79977300 | -0.94001700 | C            | -1.82443700 | -2.60158400 | -0.89134700 |
| H | -1.31509500 | -4.80273700 | -1.87570700 | C            | -1.41878300 | -3.81679000 | -1.43341000 |
| H | 1.13025800  | -4.93190100 | -2.14555200 | C            | -0.06799800 | -4.08812600 | -1.59978900 |
| H | 2.79376100  | -2.64838600 | -3.78766900 | C            | 0.88448900  | -3.13361500 | -1.24311700 |
| H | 4.31936000  | -1.99786500 | -3.13375900 | C            | 2.37424300  | -3.31049800 | -1.51021200 |
| H | 2.79683600  | -1.10511600 | -2.91633300 | C            | 2.70443100  | -2.60453800 | -2.84645300 |
| H | 3.21755600  | -4.80891200 | -2.55704000 | C            | 2.78368600  | -4.78025800 | -1.61062200 |
| H | 4.70746900  | -4.16467900 | -1.89346800 | B            | -1.38258200 | -0.28337400 | 0.36152400  |
| H | 3.46789300  | -4.82066000 | -0.79847200 | C            | -0.81623000 | 1.07374500  | -0.41158300 |
| H | 3.58201600  | 2.20506600  | 3.00306200  | C            | -0.79827400 | 1.14285100  | -1.80984500 |
| H | 2.75481800  | 1.18085300  | 5.08450000  | F            | -1.27587100 | 0.12963800  | -2.53762800 |
| H | 3.10662900  | -0.08625800 | 3.90082300  | C            | -0.35468100 | 2.24067000  | -2.53447300 |
| H | 1.42965100  | 0.38993700  | 4.22308200  | F            | -0.35914400 | 2.23023200  | -3.86809700 |
| H | 0.58123600  | 2.72284700  | 3.41158200  | C            | 0.12612700  | 3.35638400  | -1.86160400 |
| H | 1.72049000  | 3.86176500  | 2.69054400  | F            | 0.63388700  | 4.39151200  | -2.53191200 |
| H | 1.88332300  | 3.41419600  | 4.39415700  | C            | 0.10274400  | 3.35541500  | -0.47974900 |
| H | 1.70559800  | 3.42040600  | 0.38812000  | C            | -0.39110300 | 2.24508700  | 0.19995300  |
| H | 4.09220900  | 4.12324200  | -0.12221900 | F            | -0.38013800 | 2.36906600  | 1.55001100  |
| H | 3.81708200  | 3.85602900  | 1.59983100  | F            | 0.62170400  | 4.39047400  | 0.20240800  |
| H | 4.66219500  | 2.62884500  | 0.62801500  | C            | -3.04148700 | -0.18079000 | 0.42936200  |
| H | 2.61477900  | 3.13455700  | -1.86489900 | C            | -3.85438900 | 0.73481100  | -0.23930800 |
| H | 3.44021500  | 1.63650700  | -1.40258100 | F            | -3.34601000 | 1.67307400  | -1.05803300 |
| H | 1.67548000  | 1.67362600  | -1.49599700 | C            | -5.24148600 | 0.77999800  | -0.12423000 |
| H | 0.56508000  | 0.39477200  | 1.28754400  | F            | -5.94484700 | 1.69530900  | -0.79476600 |
| C | -0.33136200 | -0.55933700 | 1.89379200  | C            | -5.89694300 | -0.13105500 | 0.68436600  |
| H | -0.41471600 | 0.23534600  | 2.64875300  | F            | -7.22345400 | -0.10285400 | 0.80438600  |
| H | -1.28156100 | -1.06973800 | 2.02123700  | C            | -5.14500200 | -1.07435900 | 1.36694800  |
| C | 0.59634300  | -2.89852200 | 2.08526200  | C            | -3.76470700 | -1.07506000 | 1.22167800  |
| H | -0.30537100 | -3.35234900 | 1.68621500  | F            | -3.12168600 | -2.03847800 | 1.90473300  |
| C | 0.71315800  | -1.58053800 | 2.24240600  | F            | -5.75107200 | -1.97030500 | 2.14908100  |
| H | 1.65991100  | -1.21028000 | 2.62905000  | C            | 3.27466500  | 1.85292100  | 2.71959900  |

|               |             |             |             |   |             |             |             |
|---------------|-------------|-------------|-------------|---|-------------|-------------|-------------|
| C             | 2.82968800  | 0.94102400  | 3.86712000  | H | 0.09922900  | 2.50004900  | -2.53908300 |
| C             | 2.66334700  | 3.25924800  | 2.82725700  | H | 1.85577700  | 2.57229100  | -2.29013600 |
| C             | 3.26817900  | 2.26783000  | -0.25457900 | C | 0.78937700  | 1.49125000  | -0.76401600 |
| C             | 4.75359300  | 2.62079500  | -0.14094000 | C | -0.31643300 | 0.78625200  | -0.42594400 |
| C             | 2.94229200  | 1.59611000  | -1.59338100 | P | 2.19013500  | 1.20639200  | 0.35200500  |
| H             | 5.25932800  | -0.21660800 | 1.86109700  | C | 3.53988200  | 0.34567800  | -0.51076000 |
| H             | 6.11690100  | -2.46479300 | 1.25504200  | C | 3.42001700  | -0.03463900 | -1.84915600 |
| H             | 4.80893800  | -3.91194900 | -0.24516200 | H | 2.52496700  | 0.22478500  | -2.40894100 |
| H             | -2.88722900 | -2.41408600 | -0.77548500 | C | 4.42501300  | -0.78960300 | -2.45159100 |
| H             | -2.15821600 | -4.55564600 | -1.72625300 | H | 4.31676400  | -1.10000700 | -3.48572000 |
| H             | 0.24247200  | -5.03892900 | -2.01785200 | C | 5.54643000  | -1.16896000 | -1.72022600 |
| H             | 2.15267700  | -3.08243600 | -3.66109300 | H | 6.31826300  | -1.77243100 | -2.18630600 |
| H             | 3.77748700  | -2.66227100 | -3.05857800 | C | 5.67237200  | -0.78900800 | -0.38407500 |
| H             | 2.40820100  | -1.55154800 | -2.81069100 | H | 6.53862300  | -1.09631200 | 0.19201900  |
| H             | 2.25553700  | -5.26626900 | -2.43299600 | C | 4.67240400  | -0.03669800 | 0.22117300  |
| H             | 3.85044400  | -4.87135500 | -1.83239600 | H | 4.75601400  | 0.23125100  | 1.27214500  |
| H             | 2.56403700  | -5.32166800 | -0.68609000 | C | 2.79076500  | 2.88787700  | 0.72925900  |
| H             | 4.36928000  | 1.92475100  | 2.70872700  | C | 4.09273400  | 3.31562100  | 0.46300100  |
| H             | 3.11650200  | 1.39954400  | 4.81722100  | H | 4.80074900  | 2.64366100  | -0.01199800 |
| H             | 3.29529500  | -0.04583600 | 3.80741400  | C | 4.48129100  | 4.61041200  | 0.79966500  |
| H             | 1.74310200  | 0.80751300  | 3.86851600  | H | 5.49400900  | 4.93822100  | 0.58845600  |
| H             | 2.86826800  | 3.66111200  | 3.82266800  | C | 3.57513400  | 5.48211100  | 1.39496700  |
| H             | 1.57807600  | 3.22849200  | 2.68781100  | H | 3.88060100  | 6.49084200  | 1.65303400  |
| H             | 3.08082900  | 3.95271200  | 2.09237700  | C | 2.27230300  | 5.06114000  | 1.65629300  |
| H             | 2.65491500  | 3.16864000  | -0.13039900 | H | 1.56038800  | 5.74067000  | 2.11308400  |
| H             | 5.04182400  | 3.22777700  | -1.00293400 | C | 1.88107900  | 3.76785700  | 1.33073700  |
| H             | 4.98239500  | 3.19317300  | 0.76234200  | H | 0.85814400  | 3.44708200  | 1.51862700  |
| H             | 5.37099900  | 1.71591700  | -0.15150800 | B | -0.27129600 | -0.45236800 | 0.67732600  |
| H             | 3.03630900  | 2.33224400  | -2.39657600 | C | -1.61472600 | 1.26341200  | -0.99251000 |
| H             | 3.64333100  | 0.77770500  | -1.78709300 | F | -1.24725600 | 3.37135800  | 0.03464000  |
| H             | 1.92726600  | 1.19082300  | -1.61446400 | C | -2.02847400 | 2.56705200  | -0.69752000 |
| H             | 1.37952000  | 1.05720900  | 1.12709400  | F | -3.59639800 | 4.32711200  | -0.77712600 |
| C             | -0.77101900 | -0.45028100 | 1.92486900  | C | -3.25266700 | 3.08078700  | -1.09265300 |
| H             | 0.05626800  | 0.23587800  | 2.13008600  | F | -5.30609900 | 2.75237300  | -2.19656000 |
| H             | -1.55689500 | -0.15451900 | 2.63295300  | C | -4.12914200 | 2.27773100  | -1.80866200 |
| C             | 0.92647400  | -2.14166500 | 2.71212300  | F | -4.59756700 | 0.19598800  | -2.79469400 |
| H             | 1.69133300  | -1.38234100 | 2.85819000  | C | -3.76273700 | 0.97642800  | -2.11451500 |
| C             | -0.29616800 | -1.82740700 | 2.28395600  | F | -2.25994700 | -0.77837100 | -2.01668200 |
| H             | -1.01240900 | -2.63525000 | 2.15346000  | C | -2.52835800 | 0.48548100  | -1.70382000 |
| H             | 1.21241600  | -3.16491300 | 2.93514400  | C | 0.92464700  | -1.51842000 | 0.30611600  |
| <b>P23_TS</b> |             |             |             | F | 0.02561200  | -1.73408000 | -1.86591400 |
| C             | 0.88455600  | 2.59612000  | -1.78549000 | C | 0.97881500  | -2.04914700 | -0.98400300 |
| H             | 0.79028400  | 3.57868300  | -1.31289000 | F | 1.99452200  | -3.30556300 | -2.70784500 |
|               |             |             |             | C | 1.98490900  | -2.88198900 | -1.44431600 |



|               |             |             |             |   |             |             |             |
|---------------|-------------|-------------|-------------|---|-------------|-------------|-------------|
| C             | 3.94464100  | -0.84545200 | 1.36341900  | H | -5.25481100 | -2.88001100 | 1.21250400  |
| F             | 1.84013400  | -1.82852100 | 1.35428600  | C | -3.81110800 | -1.35208700 | 0.82548300  |
| C             | 2.57526500  | -0.70695800 | 1.21213900  | C | -2.15104600 | -0.69151400 | -2.60210600 |
| H             | -2.46929600 | 0.44403300  | 0.87342800  | H | -1.80730100 | -1.49642300 | -3.25656000 |
| C             | -0.32923000 | -0.03882300 | 2.21778000  | H | -1.27515000 | -0.14828000 | -2.25948500 |
| H             | -0.71292900 | -1.06290500 | 2.14131800  | H | -2.75460200 | -0.01304000 | -3.21400400 |
| H             | -1.18913300 | 0.59883300  | 2.47886000  | C | -5.39776700 | -4.18512900 | -1.17154400 |
| C             | 0.91831700  | -1.09226300 | 4.12438300  | H | -6.32972300 | -4.23749800 | -0.60384400 |
| H             | 0.53856900  | -2.07934500 | 3.86984800  | H | -4.80101700 | -5.06820700 | -0.92061400 |
| C             | 0.59011900  | -0.02082700 | 3.40642900  | H | -5.63363800 | -4.23278100 | -2.23689200 |
| H             | 1.00445200  | 0.94579800  | 3.68462400  | C | -3.87552700 | -0.87075300 | 2.25448800  |
| H             | 1.58591300  | -1.02604000 | 4.97739600  | H | -4.14223400 | 0.18989900  | 2.31361800  |
|               |             |             |             | H | -2.91682600 | -1.00808400 | 2.76467100  |
|               |             |             |             | H | -4.63008100 | -1.43546800 | 2.80514600  |
|               |             |             |             | C | -0.52611100 | 2.29850100  | -1.36355800 |
|               |             |             |             | C | -0.97356500 | 3.57154500  | -0.99051200 |
|               |             |             |             | H | -1.23534500 | 3.77683600  | 0.04064300  |
|               |             |             |             | C | -1.05516900 | 4.59296100  | -1.93276000 |
|               |             |             |             | H | -1.40469800 | 5.57285100  | -1.62374500 |
|               |             |             |             | C | -0.68383100 | 4.36815800  | -3.25474700 |
|               |             |             |             | H | -0.75440900 | 5.16756500  | -3.98528200 |
|               |             |             |             | C | -0.20311800 | 3.11619500  | -3.62996900 |
|               |             |             |             | H | 0.11202700  | 2.93388900  | -4.65229800 |
|               |             |             |             | C | -0.12066400 | 2.09426500  | -2.69176400 |
|               |             |             |             | H | 0.27496700  | 1.12237200  | -2.97732000 |
|               |             |             |             | C | 1.98501300  | 1.34654100  | -0.49946100 |
|               |             |             |             | C | 2.14650200  | 2.62605100  | 0.04389300  |
|               |             |             |             | F | 1.23052900  | 3.11994200  | 0.88314600  |
|               |             |             |             | C | 3.25271200  | 3.41801200  | -0.21234600 |
|               |             |             |             | F | 3.35967900  | 4.62593400  | 0.33599900  |
|               |             |             |             | C | 4.26500800  | 2.93433700  | -1.03021900 |
|               |             |             |             | F | 5.33308900  | 3.68050100  | -1.28624500 |
|               |             |             |             | C | 4.15213100  | 1.66403600  | -1.57128200 |
|               |             |             |             | F | 5.11796100  | 1.18633800  | -2.35234300 |
|               |             |             |             | C | 3.03115000  | 0.88830600  | -1.29630000 |
|               |             |             |             | F | 3.00224700  | -0.32666200 | -1.84050200 |
|               |             |             |             | C | -0.00997900 | -2.04037900 | 0.07142200  |
|               |             |             |             | C | 0.10125200  | -2.32603900 | -1.28919600 |
|               |             |             |             | F | 0.87075700  | -1.55862800 | -2.07207700 |
|               |             |             |             | C | -0.55543800 | -3.36602100 | -1.92709400 |
|               |             |             |             | F | -0.44521800 | -3.52750300 | -3.24816400 |
|               |             |             |             | C | -1.41562100 | -4.17409400 | -1.20238600 |
|               |             |             |             | F | -2.13558700 | -5.11379700 | -1.80963100 |
|               |             |             |             | C | -1.58248500 | -3.92942800 | 0.14800000  |
| <b>P24_TS</b> |             |             |             |   |             |             |             |
| P             | -1.83978700 | 0.52324700  | 0.55282700  |   |             |             |             |
| B             | 0.90592300  | -0.84616100 | 0.70741700  |   |             |             |             |
| C             | -0.41999600 | 1.13988700  | -0.42511700 |   |             |             |             |
| C             | 0.76961200  | 0.56012500  | -0.11128000 |   |             |             |             |
| C             | -2.90879300 | 2.01015200  | 0.82175300  |   |             |             |             |
| C             | -3.82273100 | 2.47171900  | -0.15182800 |   |             |             |             |
| C             | -4.56220900 | 3.62617900  | 0.11354000  |   |             |             |             |
| H             | -5.25727900 | 3.97881400  | -0.64457000 |   |             |             |             |
| C             | -4.42258600 | 4.35270900  | 1.29097400  |   |             |             |             |
| C             | -3.49139900 | 3.90309000  | 2.22278200  |   |             |             |             |
| H             | -3.33895800 | 4.46377900  | 3.14187700  |   |             |             |             |
| C             | -2.73894200 | 2.75106900  | 2.00854700  |   |             |             |             |
| C             | -3.99621200 | 1.84076300  | -1.50714900 |   |             |             |             |
| H             | -4.58443900 | 2.49936000  | -2.14892800 |   |             |             |             |
| H             | -4.50191700 | 0.87359400  | -1.45043000 |   |             |             |             |
| H             | -3.02518800 | 1.69440300  | -1.98854300 |   |             |             |             |
| C             | -5.25308300 | 5.57995300  | 1.55474500  |   |             |             |             |
| H             | -4.68783500 | 6.32654200  | 2.11774200  |   |             |             |             |
| H             | -6.13914900 | 5.32345600  | 2.14454700  |   |             |             |             |
| H             | -5.59576600 | 6.03515700  | 0.62290300  |   |             |             |             |
| C             | -1.75704800 | 2.33211700  | 3.06272100  |   |             |             |             |
| H             | -0.76265300 | 2.14516000  | 2.64090000  |   |             |             |             |
| H             | -2.10159100 | 1.41147500  | 3.54033300  |   |             |             |             |
| H             | -1.65723900 | 3.10047200  | 3.83202500  |   |             |             |             |
| C             | -2.95274600 | -0.77160700 | -0.14250200 |   |             |             |             |
| C             | -2.96878500 | -1.25216300 | -1.46635600 |   |             |             |             |
| C             | -3.80921400 | -2.32431200 | -1.78036900 |   |             |             |             |
| H             | -3.79084800 | -2.70942600 | -2.79858300 |   |             |             |             |
| C             | -4.61666200 | -2.94440300 | -0.83528200 |   |             |             |             |
| C             | -4.62062700 | -2.42277300 | 0.45688500  |   |             |             |             |

|              |             |             |             |   |             |             |             |
|--------------|-------------|-------------|-------------|---|-------------|-------------|-------------|
| F            | -2.45842300 | -4.65106700 | 0.84865700  | C | -2.87086500 | 1.83706400  | 3.05904900  |
| C            | -0.88808700 | -2.88501600 | 0.74567700  | H | -1.81040000 | 2.09300400  | 2.98819100  |
| F            | -1.19109500 | -2.68392000 | 2.03829900  | H | -2.92474200 | 0.76678600  | 3.27703800  |
| C            | 2.47483200  | -1.28406200 | 0.91123900  | H | -3.28592000 | 2.37053600  | 3.91605500  |
| C            | 3.01671300  | -2.50666000 | 0.50596700  | C | -2.83216600 | -0.99352500 | -0.50193600 |
| F            | 2.26474000  | -3.46550400 | -0.04913900 | C | -2.58109700 | -1.36568400 | -1.83434500 |
| C            | 4.36059400  | -2.84248800 | 0.64157600  | C | -3.34480400 | -2.39082600 | -2.39843900 |
| F            | 4.79855400  | -4.02900500 | 0.22600600  | H | -3.13274200 | -2.68161400 | -3.42464000 |
| C            | 5.24356000  | -1.94639900 | 1.21840100  | C | -4.31562400 | -3.07618400 | -1.67987100 |
| F            | 6.52710700  | -2.25622100 | 1.35971500  | C | -4.52525300 | -2.71101000 | -0.34986600 |
| C            | 4.76037200  | -0.72287200 | 1.65564500  | H | -5.25698300 | -3.25547900 | 0.24127900  |
| F            | 5.58159300  | 0.15645500  | 2.22617600  | C | -3.80800100 | -1.68674300 | 0.25963700  |
| C            | 3.41389900  | -0.42902100 | 1.49926400  | C | -1.50660100 | -0.77113600 | -2.70649900 |
| F            | 3.04721700  | 0.77878900  | 1.97111800  | H | -1.00085000 | -1.57342200 | -3.24937900 |
| H            | -0.72645600 | -0.16993400 | 1.69703300  | H | -0.74582600 | -0.24902600 | -2.13260000 |
| C            | 0.45883400  | -0.62956800 | 2.60211800  | H | -1.93150700 | -0.08083400 | -3.44272300 |
| H            | 1.25681200  | 0.09625800  | 2.73598700  | C | -5.06013000 | -4.23245900 | -2.28725000 |
| C            | -1.01132600 | -1.40989200 | 4.53931500  | H | -6.06734500 | -4.31938200 | -1.87359500 |
| H            | -1.00225900 | -2.45369600 | 4.24732800  | H | -4.52574000 | -5.16250600 | -2.06964000 |
| C            | -0.41306500 | -0.45572100 | 3.82612900  | H | -5.13461100 | -4.13260100 | -3.37214600 |
| H            | -0.43537400 | 0.55269700  | 4.22418500  | C | -4.07240600 | -1.41295600 | 1.72128300  |
| H            | -1.52368700 | -1.15770100 | 5.46235500  | H | -4.38841000 | -0.37940400 | 1.89471400  |
| H            | 0.86203400  | -1.63840700 | 2.69602900  | H | -3.18734100 | -1.61442200 | 2.33694800  |
| <b>P24_P</b> |             |             |             | H | -4.86738000 | -2.06767000 | 2.08030500  |
| P            | -2.00608500 | 0.38323400  | 0.37501800  | C | -0.53126500 | 2.33586700  | -1.00180100 |
| B            | 1.22879000  | -0.77218800 | 1.10914100  | C | -1.06424400 | 3.52013200  | -0.48380700 |
| C            | -0.40504500 | 1.09610700  | -0.16190800 | H | -1.37775100 | 3.55906000  | 0.55438200  |
| C            | 0.80589400  | 0.59649800  | 0.22181700  | C | -1.17596600 | 4.65549000  | -1.28187000 |
| C            | -3.29002300 | 1.68374100  | 0.53344900  | H | -1.59355100 | 5.56504400  | -0.86265600 |
| C            | -3.98796100 | 2.13463000  | -0.60733600 | C | -0.74301800 | 4.62813600  | -2.60362400 |
| C            | -4.99355900 | 3.08787700  | -0.44704100 | H | -0.82873900 | 5.51435500  | -3.22407000 |
| H            | -5.51774600 | 3.43784900  | -1.33281800 | C | -0.17558400 | 3.46511700  | -3.12029900 |
| C            | -5.33908600 | 3.60506200  | 0.79619400  | H | 0.19006400  | 3.44247200  | -4.14168700 |
| C            | -4.62728900 | 3.15812000  | 1.90619600  | C | -0.06826900 | 2.32989200  | -2.32567800 |
| H            | -4.86208800 | 3.56245200  | 2.88761800  | H | 0.40135400  | 1.43348400  | -2.72164000 |
| C            | -3.60797900 | 2.21424000  | 1.80385700  | C | 1.92244400  | 1.51641700  | -0.17245500 |
| C            | -3.70199700 | 1.66627200  | -2.00930000 | C | 2.09542800  | 2.73660700  | 0.47446700  |
| H            | -4.08357200 | 2.39631400  | -2.72561900 | F | 1.23477100  | 3.11493600  | 1.42695600  |
| H            | -4.18017300 | 0.70297300  | -2.21245200 | C | 3.14592600  | 3.58859600  | 0.17492600  |
| H            | -2.63102100 | 1.56600700  | -2.19540800 | F | 3.28678900  | 4.74452900  | 0.81961200  |
| C            | -6.45385500 | 4.60486700  | 0.94461300  | C | 4.05749500  | 3.22831200  | -0.80892700 |
| H            | -7.38289400 | 4.10098000  | 1.23041500  | F | 5.06650200  | 4.03843800  | -1.11115600 |
| H            | -6.63788400 | 5.13589300  | 0.00844900  | C | 3.89759200  | 2.02998500  | -1.48959100 |
| H            | -6.22568600 | 5.33881500  | 1.72107900  | F | 4.75164300  | 1.69297200  | -2.45273400 |

|               |             |             |             |   |             |             |             |
|---------------|-------------|-------------|-------------|---|-------------|-------------|-------------|
| C             | 2.83607000  | 1.19513300  | -1.16726700 | C | 0.81742000  | -3.22698000 | 3.84977700  |
| F             | 2.68306000  | 0.07398300  | -1.87460800 | C | 1.03838600  | -1.56566900 | 1.52188900  |
| C             | 0.17563300  | -1.97160000 | 0.67648800  | H | -3.57831700 | -2.45203100 | 1.04238000  |
| C             | 0.17361000  | -2.44125500 | -0.63796900 | C | 2.11133000  | -1.92538700 | 2.31870500  |
| F             | 0.99674000  | -1.87826100 | -1.53522400 | C | 2.02271600  | -2.70733800 | 3.48781900  |
| C             | -0.60588700 | -3.48819600 | -1.09761000 | H | 3.10677900  | -1.63173600 | 2.02211100  |
| F             | -0.57957400 | -3.85361300 | -2.38289900 | H | 2.91960400  | -2.91867100 | 4.06100000  |
| C             | -1.49140100 | -4.10676300 | -0.22741000 | P | -1.73302100 | -0.59541000 | -0.05520400 |
| F             | -2.30616800 | -5.06753800 | -0.66311100 | B | 1.40125800  | -0.84292500 | 0.08762700  |
| C             | -1.55745800 | -3.66784000 | 1.08161000  | C | 2.99978600  | -0.71510300 | -0.35953300 |
| F             | -2.47018600 | -4.18303600 | 1.91060000  | C | 3.88681900  | -0.02979100 | 0.47981700  |
| C             | -0.73124800 | -2.62854000 | 1.50166700  | F | 3.46367400  | 0.45063200  | 1.66102000  |
| F             | -0.92102100 | -2.24619500 | 2.77927600  | C | 5.21669000  | 0.23728300  | 0.18509200  |
| C             | 2.81250500  | -1.24961100 | 0.78781200  | F | 5.99075100  | 0.86636800  | 1.06874800  |
| C             | 3.22913000  | -2.49816300 | 0.31148400  | C | 5.72394100  | -0.12650100 | -1.05105200 |
| F             | 2.36354000  | -3.49090200 | 0.04573900  | F | 6.99153300  | 0.12030800  | -1.36812600 |
| C             | 4.55450200  | -2.86323200 | 0.09309800  | C | 4.87222900  | -0.72861000 | -1.95995000 |
| F             | 4.84446100  | -4.07691300 | -0.37769800 | C | 3.54594300  | -0.97726800 | -1.61911500 |
| C             | 5.57579400  | -1.97569400 | 0.37690100  | F | 2.81385100  | -1.45994400 | -2.63324800 |
| F             | 6.84767200  | -2.30960700 | 0.17587200  | F | 5.31643700  | -1.04097200 | -3.17724400 |
| C             | 5.23800400  | -0.73900900 | 0.89677300  | C | 0.99314900  | 0.74071400  | -0.09765800 |
| F             | 6.19173600  | 0.14019200  | 1.20779800  | C | 0.85175500  | 1.30674500  | -1.36126000 |
| C             | 3.90122800  | -0.42490000 | 1.10567600  | F | 0.80906800  | 0.50095300  | -2.44239700 |
| F             | 3.72321500  | 0.78933500  | 1.66714900  | C | 0.69178000  | 2.66342100  | -1.59086500 |
| H             | -1.77232500 | -0.08840600 | 1.67234400  | F | 0.47570800  | 3.12840100  | -2.82361900 |
| C             | 1.24739700  | -0.46349400 | 2.73887900  | C | 0.68582100  | 3.53210300  | -0.50879300 |
| H             | 2.19589300  | 0.03980400  | 2.94675300  | F | 0.46257700  | 4.83267200  | -0.68861200 |
| C             | -0.52559400 | 0.08137700  | 4.44255300  | C | 0.84003700  | 3.02309300  | 0.76922200  |
| H             | -0.45123700 | -0.90235700 | 4.89757400  | C | 0.98400000  | 1.65255800  | 0.95459900  |
| C             | 0.21028400  | 0.40056400  | 3.37700200  | F | 1.06530500  | 1.24373700  | 2.22563900  |
| H             | 0.13611400  | 1.40937200  | 2.96211700  | F | 0.78753000  | 3.84812900  | 1.81633700  |
| H             | -1.19829600 | 0.79176000  | 4.91400000  | C | -3.31423400 | -0.96812400 | -0.93892900 |
| H             | 1.29646100  | -1.42597200 | 3.26068700  | C | -4.57162600 | -0.63727600 | -0.37984600 |
|               |             |             |             | C | -4.77416800 | -0.02002600 | 0.98546400  |
|               |             |             |             | C | -5.72646600 | -0.85840000 | -1.13242700 |
|               |             |             |             | C | -5.68992500 | -1.38069600 | -2.42060700 |
|               |             |             |             | C | -6.95556300 | -1.63140000 | -3.19618700 |
|               |             |             |             | C | -4.44420900 | -1.68116100 | -2.96161300 |
|               |             |             |             | C | -3.25936700 | -1.48527300 | -2.25264500 |
|               |             |             |             | C | -1.97236700 | -1.83071900 | -2.95962000 |
|               |             |             |             | C | -2.01713700 | 1.09848900  | 0.61552300  |
|               |             |             |             | C | -1.96733400 | 1.47141000  | 1.98036500  |
|               |             |             |             | C | -1.74981600 | 0.52380800  | 3.13745000  |
|               |             |             |             | C | -2.11300400 | 2.82025300  | 2.30304200  |
|               |             |             |             |   |             |             |             |
| <b>P25_TS</b> |             |             |             |   |             |             |             |
| C             | -2.66770100 | -3.49057500 | 2.68281400  |   |             |             |             |
| C             | -1.53087500 | -3.62228200 | 3.42597800  |   |             |             |             |
| C             | -0.33030900 | -2.95798500 | 3.06333500  |   |             |             |             |
| C             | -0.26525500 | -2.08562500 | 1.92206500  |   |             |             |             |
| C             | -1.54138700 | -1.85293700 | 1.26592300  |   |             |             |             |
| C             | -2.66098900 | -2.58858700 | 1.60328100  |   |             |             |             |
| H             | 0.71361100  | -3.87282000 | 4.71700500  |   |             |             |             |
| H             | -3.57054200 | -4.03851800 | 2.92937600  |   |             |             |             |
| H             | -1.50856700 | -4.27200000 | 4.29656700  |   |             |             |             |



|              |             |             |             |   |             |             |             |
|--------------|-------------|-------------|-------------|---|-------------|-------------|-------------|
| C            | -2.31766100 | 3.81052900  | 1.34459800  | H | 0.85026100  | -3.83530800 | 4.66205100  |
| C            | -2.34292900 | 5.26552200  | 1.72395800  | H | -3.47454200 | -3.92361800 | 3.03650200  |
| C            | -2.41639800 | 3.41407600  | 0.01766000  | H | -1.36734600 | -4.15204300 | 4.33986500  |
| C            | -2.25649000 | 2.08224400  | -0.37059000 | C | 0.95401600  | -3.21404300 | 3.77731200  |
| C            | -2.34799400 | 1.79203800  | -1.85287200 | C | 1.16529800  | -1.61176100 | 1.39786500  |
| H            | -5.76965800 | -0.27437500 | 1.35676500  | H | -3.50890100 | -2.41475200 | 1.10503300  |
| H            | -4.04415300 | -0.35767400 | 1.72080000  | C | 2.24582100  | -2.00389000 | 2.17588000  |
| H            | -4.69978700 | 1.07103300  | 0.93313300  | C | 2.16846400  | -2.75785200 | 3.35993700  |
| H            | -6.68771300 | -0.60392600 | -0.69130600 | H | 3.24096700  | -1.74921700 | 1.83951800  |
| H            | -7.75360400 | -0.95507600 | -2.88174300 | H | 3.07454800  | -2.99629000 | 3.90776800  |
| H            | -6.79426200 | -1.50051400 | -4.26875100 | P | -1.92029600 | -0.58066800 | 0.02301000  |
| H            | -7.30728800 | -2.65613700 | -3.03767800 | B | 1.51241500  | -0.94951600 | -0.08267900 |
| H            | -4.38596500 | -2.07436900 | -3.97375000 | C | 3.14022800  | -0.66009600 | -0.37562200 |
| H            | -2.15391200 | -1.94711200 | -4.02970700 | C | 3.96063100  | 0.05245600  | 0.50463000  |
| H            | -1.56140800 | -2.77692700 | -2.59493900 | F | 3.47486000  | 0.48374500  | 1.68228600  |
| H            | -1.20391500 | -1.06424500 | -2.83040100 | C | 5.28909200  | 0.38064400  | 0.27086400  |
| H            | -1.86486800 | 1.07067900  | 4.07505000  | F | 6.00000500  | 1.03973400  | 1.18915500  |
| H            | -0.74421400 | 0.10110000  | 3.12188200  | C | 5.86960100  | 0.03818800  | -0.93914100 |
| H            | -2.45676900 | -0.30981100 | 3.14751900  | F | 7.13963700  | 0.34740200  | -1.19584300 |
| H            | -2.04423700 | 3.11017600  | 3.34869700  | C | 5.09297100  | -0.61079700 | -1.88213800 |
| H            | -2.95825400 | 5.84906900  | 1.03524100  | C | 3.76480100  | -0.92035500 | -1.59916100 |
| H            | -1.32417600 | 5.66563800  | 1.68575400  | F | 3.10698700  | -1.46069700 | -2.63497000 |
| H            | -2.72174300 | 5.40914400  | 2.73849400  | F | 5.61446600  | -0.91422700 | -3.07271000 |
| H            | -2.57311400 | 4.16547300  | -0.75346100 | C | 0.97928200  | 0.62768800  | -0.24605200 |
| H            | -2.09955400 | 2.69182600  | -2.42008700 | C | 0.74622300  | 1.21968300  | -1.48559100 |
| H            | -1.65581600 | 1.00913400  | -2.17636300 | F | 0.60951600  | 0.44615400  | -2.58425200 |
| H            | -3.35673200 | 1.47347100  | -2.13621400 | C | 0.55509800  | 2.57935300  | -1.68933400 |
| H            | -0.11084700 | -1.10742700 | -0.65581700 | F | 0.24791300  | 3.05404100  | -2.90090200 |
| C            | 0.71539500  | -2.17415200 | -1.07562800 | C | 0.60294100  | 3.43667000  | -0.60194900 |
| H            | 0.77030800  | -1.92427700 | -2.13131600 | F | 0.34110000  | 4.73677400  | -0.74876300 |
| C            | 2.28413400  | -4.04277600 | -1.67692400 | C | 0.81923200  | 2.90879200  | 0.65936800  |
| H            | 2.23878100  | -3.79885000 | -2.73305100 | C | 0.97750000  | 1.53685000  | 0.81481800  |
| C            | 1.65709000  | -3.32119900 | -0.75369200 | F | 1.06521800  | 1.11952700  | 2.08610900  |
| H            | 1.72845900  | -3.60584000 | 0.29150000  | F | 0.79353500  | 3.72047400  | 1.72107000  |
| H            | 2.87856800  | -4.90411800 | -1.39002600 | C | -3.49323100 | -0.99114800 | -0.80452000 |
| H            | -0.25688500 | -2.65172500 | -0.88664200 | C | -4.72986400 | -0.58499100 | -0.25782400 |
|              |             |             |             | C | -4.89165900 | 0.06573400  | 1.09676500  |
|              |             |             |             | C | -5.88719400 | -0.78527500 | -1.01005900 |
|              |             |             |             | C | -5.86055900 | -1.36635700 | -2.27427300 |
|              |             |             |             | C | -7.12755800 | -1.58445300 | -3.05660200 |
|              |             |             |             | C | -4.62958300 | -1.77434400 | -2.78279300 |
|              |             |             |             | C | -3.44065100 | -1.60650400 | -2.07616000 |
|              |             |             |             | C | -2.16365200 | -2.09955800 | -2.70977800 |
|              |             |             |             | C | -2.08159900 | 1.12003800  | 0.63949900  |
| <b>P25_P</b> |             |             |             |   |             |             |             |
| C            | -2.56778700 | -3.40742800 | 2.74293300  |   |             |             |             |
| C            | -1.40652300 | -3.53500400 | 3.44621300  |   |             |             |             |
| C            | -0.20242700 | -2.91758000 | 3.01810400  |   |             |             |             |
| C            | -0.13685000 | -2.07923200 | 1.84483900  |   |             |             |             |
| C            | -1.44023200 | -1.85889100 | 1.21994900  |   |             |             |             |
| C            | -2.57099900 | -2.54943800 | 1.63093700  |   |             |             |             |

|                      |             |             |             |   |             |             |             |
|----------------------|-------------|-------------|-------------|---|-------------|-------------|-------------|
| C                    | -1.96828900 | 1.48551000  | 2.00014800  | C | 0.63496900  | 2.73125700  | -0.53881400 |
| C                    | -1.72805400 | 0.52540200  | 3.14084400  | C | 1.15998000  | 3.80549400  | 0.17359800  |
| C                    | -2.06538200 | 2.83827800  | 2.31834600  | C | 1.73827700  | 3.60446300  | 1.42642600  |
| C                    | -2.26901500 | 3.82568600  | 1.35603200  | C | 1.78204700  | 2.32527600  | 1.97023600  |
| C                    | -2.21140400 | 5.28320700  | 1.71713700  | H | 0.19934200  | 2.89443000  | -1.52033100 |
| C                    | -2.43797700 | 3.42815500  | 0.03459400  | H | 1.12730900  | 4.80413300  | -0.25093000 |
| C                    | -2.34265600 | 2.09201400  | -0.35416100 | H | 2.15459400  | 4.44178200  | 1.97725600  |
| C                    | -2.52641900 | 1.79043800  | -1.82632200 | H | 2.23121100  | 2.15597600  | 2.94519000  |
| H                    | -5.90349300 | -0.11180000 | 1.46700300  | H | 0.91917800  | -0.69901200 | 0.40425800  |
| H                    | -4.19394000 | -0.32531800 | 1.84105100  | B | 0.09499700  | 0.16922700  | -0.83608100 |
| H                    | -4.73561800 | 1.14771300  | 1.03970900  | N | 1.22217400  | -0.09372500 | 1.73519500  |
| H                    | -6.83984000 | -0.47251400 | -0.58928000 | C | -1.45743900 | -0.19046300 | -0.53767500 |
| H                    | -6.95926700 | -1.44092100 | -4.12640100 | C | -2.41155500 | 0.65536100  | -1.10265500 |
| H                    | -7.49393600 | -2.60624000 | -2.91448900 | C | -1.98276800 | -1.23334100 | 0.21436800  |
| H                    | -7.91530300 | -0.90007400 | -2.73501700 | C | -3.77997100 | 0.48563400  | -0.95025600 |
| H                    | -4.58859400 | -2.24142200 | -3.76359100 | C | -3.34534000 | -1.44274400 | 0.39962800  |
| H                    | -2.38455800 | -2.58295300 | -3.66237800 | C | -4.25179100 | -0.57599300 | -0.18958900 |
| H                    | -1.65433300 | -2.83209000 | -2.07734600 | C | 2.51360300  | -0.56496600 | 2.25235000  |
| H                    | -1.44829800 | -1.29382300 | -2.91115700 | H | 2.47207200  | -1.65207500 | 2.36778400  |
| H                    | -1.79302300 | 1.06839700  | 4.08496800  | H | 3.30126500  | -0.31341300 | 1.54060200  |
| H                    | -0.73308900 | 0.08206200  | 3.07810100  | H | 2.74067100  | -0.11971800 | 3.22982100  |
| H                    | -2.45498100 | -0.29074500 | 3.17428300  | C | 0.14542000  | -0.31145600 | 2.71298500  |
| H                    | -1.94360700 | 3.13377200  | 3.35702100  | H | 0.05503300  | -1.37927700 | 2.92342000  |
| H                    | -2.86677000 | 5.88191900  | 1.08064900  | H | 0.35736100  | 0.23005000  | 3.64416300  |
| H                    | -1.18567400 | 5.63864500  | 1.57294000  | H | -0.79473600 | 0.05352300  | 2.29649100  |
| H                    | -2.48342500 | 5.45101300  | 2.76127900  | F | -2.01277500 | 1.69724600  | -1.84506200 |
| H                    | -2.59687400 | 4.18253400  | -0.73231900 | F | -4.64152700 | 1.32461700  | -1.52235700 |
| H                    | -2.34356900 | 2.69713800  | -2.40614000 | F | -5.55942700 | -0.75614300 | -0.02601700 |
| H                    | -1.83279500 | 1.03684000  | -2.21094400 | F | -3.78061900 | -2.46402800 | 1.13765500  |
| H                    | -3.54353400 | 1.44305800  | -2.03730700 | F | -1.16846800 | -2.11694500 | 0.82867500  |
| H                    | -1.00715000 | -0.52125800 | -1.02148300 | H | 0.27316900  | 0.32059000  | -2.01391100 |
| C                    | 0.95100400  | -2.10867300 | -1.13244500 | C | 5.37054200  | -1.11941300 | -1.44112900 |
| H                    | 0.94086900  | -1.81678000 | -2.18379900 | C | 4.52558300  | -0.06590700 | -1.77657400 |
| C                    | 2.25102400  | -4.11915500 | -1.95469500 | C | 3.15591500  | -0.15287100 | -1.53776600 |
| H                    | 2.25590300  | -3.76605400 | -2.98171000 | C | 2.60667600  | -1.30074900 | -0.95759000 |
| C                    | 1.68115800  | -3.41512000 | -0.97891200 | C | 3.46779700  | -2.35345200 | -0.62755300 |
| H                    | 1.72073200  | -3.81677300 | 0.03481300  | C | 4.83524800  | -2.26897600 | -0.86609200 |
| H                    | 2.74634600  | -5.06440100 | -1.75500000 | H | 6.43751500  | -1.04505300 | -1.62494100 |
| H                    | -0.08285900 | -2.34448600 | -0.85345000 | H | 4.93285700  | 0.83591200  | -2.22276100 |
| <b>Methylbenzene</b> |             |             |             | H | 2.51521600  | 0.68338000  | -1.79432200 |
| <b>N4_TS</b>         |             |             |             | H | 3.05524900  | -3.25227000 | -0.17479400 |
| C                    | 1.23779700  | 1.26976500  | 1.24431200  | H | 5.48146900  | -3.09977100 | -0.60056500 |
| C                    | 0.66103000  | 1.43219800  | -0.01633500 | C | 1.13510500  | -1.43176500 | -0.64736800 |
|                      |             |             |             | H | 0.55113800  | -1.72742300 | -1.52059500 |

|              |             |             |             |              |             |             |             |
|--------------|-------------|-------------|-------------|--------------|-------------|-------------|-------------|
| H            | 0.97847600  | -2.26865900 | 0.04511100  | H            | -2.29304200 | 1.41227900  | -1.91219200 |
|              |             |             |             | H            | -2.57562100 | 2.25669200  | 2.27653000  |
| <b>N4_P4</b> |             |             |             | H            | -5.01266000 | 2.61184300  | 2.05206300  |
| C            | -1.54821600 | -1.77256600 | -0.19617800 | C            | -0.77023200 | 1.54954700  | 0.35259100  |
| C            | -0.62473700 | -1.03120000 | -0.92673800 | H            | -0.24017300 | 2.49475400  | 0.17489500  |
| C            | -0.08460300 | -1.73209600 | -2.02493100 | H            | -0.56153600 | 1.32845700  | 1.41491500  |
| C            | -0.42588900 | -3.03867200 | -2.33768700 |              |             |             |             |
| C            | -1.35407700 | -3.72959600 | -1.55615700 | <b>N5_TS</b> |             |             |             |
| C            | -1.92487300 | -3.08775800 | -0.46958800 | B            | 0.50028100  | -0.29694100 | 0.23225300  |
| H            | 0.63773000  | -1.20673400 | -2.64462500 | C            | -0.19488200 | -1.07404600 | 1.47037900  |
| H            | 0.02946300  | -3.52748500 | -3.19338300 | C            | 0.66330700  | -1.41849000 | 2.53093700  |
| H            | -1.62800000 | -4.75242100 | -1.79079300 | H            | 1.70834800  | -1.13441700 | 2.47691200  |
| H            | -2.64432700 | -3.61096600 | 0.15475700  | C            | 0.22433700  | -2.07665700 | 3.66858500  |
| H            | -1.84956100 | -0.14884200 | 0.93399500  | H            | 0.92497400  | -2.31149100 | 4.46342600  |
| B            | -0.04806500 | 0.49685400  | -0.70137200 | C            | -1.11582800 | -2.43202500 | 3.78110200  |
| N            | -2.15227600 | -1.12748400 | 1.00015100  | H            | -1.48076900 | -2.95324000 | 4.66019100  |
| C            | 1.53463900  | 0.41853500  | -0.28204700 | C            | -1.99116100 | -2.11200400 | 2.75472000  |
| C            | 2.43324100  | 1.38965100  | -0.71901900 | H            | -3.03057100 | -2.39382300 | 2.84471700  |
| C            | 2.09434700  | -0.54663600 | 0.54523600  | C            | -1.54333400 | -1.43434300 | 1.61210600  |
| C            | 3.78323100  | 1.39623400  | -0.38917400 | N            | -2.45757100 | -1.10804000 | 0.52118600  |
| C            | 3.43650500  | -0.58806600 | 0.90204300  | C            | -3.02005500 | -2.33577600 | -0.19122900 |
| C            | 4.29087200  | 0.39466200  | 0.42622900  | C            | -3.71790000 | -1.83118900 | -1.46318800 |
| C            | -3.64243200 | -1.10896100 | 0.98319800  | H            | -2.97274500 | -1.37751600 | -2.12501900 |
| H            | -3.99109700 | -0.53619800 | 1.84235400  | H            | -4.12793500 | -2.69746900 | -1.99350400 |
| H            | -3.96273500 | -0.62189100 | 0.06169300  | C            | -4.80565600 | -0.80369400 | -1.17137000 |
| H            | -4.00973300 | -2.13319300 | 1.03200000  | H            | -5.61372300 | -1.26192900 | -0.58780400 |
| C            | -1.60468600 | -1.66978500 | 2.27593800  | H            | -5.25490700 | -0.46196900 | -2.10908600 |
| H            | -2.00104800 | -1.07944700 | 3.10420400  | C            | -4.20535500 | 0.38909600  | -0.43345000 |
| H            | -1.91413900 | -2.71107200 | 2.37076200  | H            | -4.98893500 | 1.10219300  | -0.15390400 |
| H            | -0.51908200 | -1.60235100 | 2.22934100  | H            | -3.52665300 | 0.91971400  | -1.10522000 |
| F            | 2.00792900  | 2.39802000  | -1.49285400 | C            | -3.45628600 | 0.00516900  | 0.85395600  |
| F            | 4.59548900  | 2.35392800  | -0.84165600 | C            | -4.49673400 | -0.29142100 | 1.95183300  |
| F            | 5.58286500  | 0.38149400  | 0.75469100  | H            | -5.29353200 | -0.96617800 | 1.64214300  |
| F            | 3.90551000  | -1.55241200 | 1.69911800  | H            | -4.97204700 | 0.66372100  | 2.19541600  |
| F            | 1.32178200  | -1.52868500 | 1.06717100  | H            | -4.04188700 | -0.65918200 | 2.87127000  |
| H            | -0.09444600 | 0.99451900  | -1.80793900 | C            | -2.64460700 | 1.19775800  | 1.35969400  |
| C            | -5.03674900 | 2.21762900  | -0.06457400 | H            | -1.78069000 | 1.38826700  | 0.72535600  |
| C            | -4.26199500 | 1.88993700  | -1.17661500 | H            | -2.28979900 | 1.03470400  | 2.37890300  |
| C            | -2.89072000 | 1.68116300  | -1.04665700 | H            | -3.27599600 | 2.09107300  | 1.34558300  |
| C            | -2.25474500 | 1.81064300  | 0.19714900  | C            | -4.00256200 | -3.20731500 | 0.61624300  |
| C            | -3.05042300 | 2.14414100  | 1.30313000  | H            | -3.48952200 | -3.76657100 | 1.39961700  |
| C            | -4.42367100 | 2.34701800  | 1.17874600  | H            | -4.42417800 | -3.94355100 | -0.07505000 |
| H            | -6.10539500 | 2.37616700  | -0.16849700 | H            | -4.83390300 | -2.66603400 | 1.05899700  |
| H            | -4.72923100 | 1.78997100  | -2.15186700 | C            | -1.86713900 | -3.26800800 | -0.57142200 |

|             |             |             |             |   |             |             |             |
|-------------|-------------|-------------|-------------|---|-------------|-------------|-------------|
| H           | -1.10656500 | -2.78402100 | -1.17671100 | C | 0.73209700  | -1.11365200 | 2.32422400  |
| H           | -2.27658200 | -4.10104200 | -1.15040900 | H | 1.78385800  | -0.88866400 | 2.17696900  |
| H           | -1.38272900 | -3.68210300 | 0.31623900  | C | 0.34681400  | -1.61148000 | 3.55559400  |
| C           | 0.92404000  | 1.24948100  | 0.50970100  | H | 1.09007000  | -1.78268500 | 4.32755700  |
| C           | 0.65247900  | 1.96313300  | 1.67613100  | C | -0.99798200 | -1.87558500 | 3.79670500  |
| F           | -0.00408400 | 1.40916100  | 2.70194400  | H | -1.33578000 | -2.26098400 | 4.75262200  |
| C           | 1.03504500  | 3.28781300  | 1.86867200  | C | -1.91156300 | -1.63043200 | 2.78762300  |
| F           | 0.73746200  | 3.91503100  | 3.00514500  | H | -2.95740700 | -1.82713300 | 2.97102600  |
| C           | 1.74754600  | 3.94974100  | 0.88208400  | C | -1.48984300 | -1.13291500 | 1.54673100  |
| F           | 2.12327000  | 5.21207500  | 1.05464200  | N | -2.56949600 | -0.89795300 | 0.53729700  |
| C           | 2.07053000  | 3.27498500  | -0.28732200 | C | -3.24885000 | -2.20196200 | -0.00809800 |
| F           | 2.76188100  | 3.89264300  | -1.24200200 | C | -4.20753300 | -1.79804400 | -1.13945300 |
| C           | 1.66545800  | 1.95874400  | -0.43918700 | H | -3.61465600 | -1.48318100 | -2.00263100 |
| F           | 2.00281600  | 1.37594000  | -1.60275500 | H | -4.74515500 | -2.70364800 | -1.43800700 |
| C           | 1.83805800  | -1.13345400 | -0.27660700 | C | -5.17163500 | -0.67298100 | -0.79077000 |
| C           | 3.07289300  | -0.90177300 | 0.33804000  | H | -5.86885100 | -0.97767500 | -0.00136900 |
| F           | 3.19054500  | -0.00415100 | 1.33294800  | H | -5.77795700 | -0.43291000 | -1.66904600 |
| C           | 4.24902300  | -1.56252700 | 0.00994000  | C | -4.37004300 | 0.55347200  | -0.37386300 |
| F           | 5.38202200  | -1.28109300 | 0.64977200  | H | -5.02836300 | 1.39876600  | -0.14961700 |
| C           | 4.24113300  | -2.51612600 | -0.99558700 | H | -3.72537300 | 0.86808200  | -1.20328800 |
| F           | 5.35595400  | -3.15782000 | -1.32829000 | C | -3.50727200 | 0.31436900  | 0.86992500  |
| C           | 3.04823300  | -2.78760700 | -1.64282400 | C | -4.38802800 | 0.13450200  | 2.10750700  |
| F           | 3.00745400  | -3.69608700 | -2.61542100 | H | -5.09750200 | -0.68894200 | 2.04828300  |
| C           | 1.89504300  | -2.10363700 | -1.27470600 | H | -4.97274200 | 1.05519300  | 2.19242600  |
| F           | 0.80175100  | -2.43679700 | -1.98593600 | H | -3.79985700 | 0.04677200  | 3.02012700  |
| H           | -1.43122600 | -0.51597800 | -0.36256000 | C | -2.60091000 | 1.51377500  | 1.12328300  |
| C           | -2.63508900 | 3.19080600  | -3.40541300 | H | -1.83484800 | 1.61491800  | 0.35248700  |
| C           | -1.98485200 | 3.43628200  | -2.20108800 | H | -2.11074300 | 1.44678700  | 2.09324800  |
| C           | -1.32740800 | 2.41207500  | -1.52294300 | H | -3.21754300 | 2.41684400  | 1.09980000  |
| C           | -1.30905700 | 1.10653600  | -2.03038200 | C | -3.98179700 | -3.03510600 | 1.04577900  |
| C           | -1.94311600 | 0.88702400  | -3.26192600 | H | -3.29300200 | -3.48206200 | 1.76166400  |
| C           | -2.60437500 | 1.90631500  | -3.93887200 | H | -4.46075500 | -3.85550900 | 0.50472900  |
| H           | -3.15020800 | 3.99164800  | -3.92545600 | H | -4.76675600 | -2.50401200 | 1.58199100  |
| H           | -1.98601700 | 4.43532100  | -1.77628700 | C | -2.13306500 | -3.06304100 | -0.58777200 |
| H           | -0.84355500 | 2.64875300  | -0.58391700 | H | -1.59277800 | -2.53760600 | -1.37708500 |
| H           | -1.91510600 | -0.10785800 | -3.69989200 | H | -2.58464200 | -3.95738500 | -1.02591300 |
| H           | -3.09017900 | 1.69485600  | -4.88629300 | H | -1.41433200 | -3.36900800 | 0.17316900  |
| C           | -0.64382100 | -0.09553600 | -1.37615300 | C | 1.04181900  | 1.41747000  | 0.28952300  |
| H           | 0.41185100  | -0.00089900 | -1.65009600 | C | 0.68157700  | 2.14406400  | 1.42245100  |
| H           | -0.90268100 | -0.98008400 | -1.96028200 | F | 0.02524300  | 1.58080900  | 2.45492900  |
|             |             |             |             | C | 0.95399500  | 3.49949900  | 1.60694600  |
|             |             |             |             | F | 0.54318400  | 4.12093400  | 2.71482100  |
|             |             |             |             | C | 1.65957800  | 4.19553300  | 0.64466000  |
|             |             |             |             | F | 1.93410700  | 5.48860400  | 0.80062600  |
| <b>N5_P</b> |             |             |             |   |             |             |             |
| B           | 0.65186400  | -0.16222500 | -0.06561200 |   |             |             |             |
| C           | -0.14849300 | -0.84036500 | 1.25093400  |   |             |             |             |

|               |             |             |             |   |             |             |             |
|---------------|-------------|-------------|-------------|---|-------------|-------------|-------------|
| C             | 2.09285200  | 3.51381200  | -0.48526100 | C | -1.78900100 | -2.25784800 | 2.89409900  |
| F             | 2.80695500  | 4.15499000  | -1.41086900 | H | -2.66318800 | -1.65282100 | 3.15016800  |
| C             | 1.78819500  | 2.17005800  | -0.62605400 | H | -2.08275800 | -3.30787100 | 2.97417700  |
| F             | 2.29163100  | 1.58476300  | -1.72508700 | C | -2.76613000 | -2.88998400 | -0.16495600 |
| C             | 2.04459200  | -1.08246800 | -0.21778300 | H | -3.36427900 | -3.40178800 | 0.60665500  |
| C             | 3.36469400  | -0.66101900 | -0.06214500 | H | -1.91879100 | -3.53482400 | -0.41583900 |
| F             | 3.66440400  | 0.58067000  | 0.35102800  | C | -3.63009900 | -2.62296200 | -1.39233700 |
| C             | 4.47283800  | -1.47892800 | -0.26803800 | H | -4.01084400 | -3.57628100 | -1.77130100 |
| F             | 5.70583000  | -1.00028700 | -0.09682500 | H | -3.01037300 | -2.18456600 | -2.18547900 |
| C             | 4.29634900  | -2.80202300 | -0.63324800 | C | -4.77072700 | -1.66583700 | -1.05428200 |
| F             | 5.34448800  | -3.59945300 | -0.82871100 | H | -5.36404400 | -1.44040000 | -1.94484600 |
| C             | 3.00516300  | -3.28641400 | -0.77427100 | H | -5.44296900 | -2.14375300 | -0.32909200 |
| F             | 2.80383700  | -4.56411200 | -1.10459400 | C | -4.19493800 | -0.38517700 | -0.45248900 |
| C             | 1.93494800  | -2.43078200 | -0.55892100 | H | -3.61017300 | 0.13944100  | -1.21286900 |
| F             | 0.71693900  | -2.99870300 | -0.68584800 | H | -4.99259300 | 0.29108600  | -0.12970900 |
| H             | -2.05823600 | -0.54949800 | -0.28960900 | C | -3.31672600 | -0.70798000 | 0.75343900  |
| C             | -3.14281600 | 1.98740900  | -3.58574000 | H | -2.87808900 | 0.20001300  | 1.17592300  |
| C             | -2.29817000 | 2.63492200  | -2.68665600 | H | -3.94465300 | -1.17303100 | 1.52849500  |
| C             | -1.29495300 | 1.93316200  | -2.02211400 | C | -0.69880300 | 1.30691600  | 0.04807800  |
| C             | -1.10514700 | 0.55617000  | -2.22458300 | F | 0.20125600  | 2.10744300  | 2.07994900  |
| C             | -1.95534800 | -0.06646500 | -3.15184100 | C | -0.63000900 | 2.28576500  | 1.04043500  |
| C             | -2.96173700 | 0.62771200  | -3.82092700 | F | -1.27486000 | 4.33910800  | 2.02258400  |
| H             | -3.92021000 | 2.53782100  | -4.10558700 | C | -1.38177600 | 3.45216400  | 1.03540700  |
| H             | -2.41265600 | 3.69940000  | -2.50527700 | F | -2.99643500 | 4.79155300  | -0.04316100 |
| H             | -0.64234100 | 2.47004600  | -1.34194800 | C | -2.25317300 | 3.68925100  | -0.01889400 |
| H             | -1.79815400 | -1.12035300 | -3.37470400 | F | -3.16693500 | 2.96786800  | -2.06795100 |
| H             | -3.59347300 | 0.10614900  | -4.53434200 | C | -2.33449500 | 2.76395900  | -1.04742400 |
| C             | 0.03203100  | -0.24478400 | -1.62084300 | F | -1.66489400 | 0.79814700  | -2.06513400 |
| H             | 0.90147700  | 0.01439700  | -2.23404200 | C | -1.54460700 | 1.62079200  | -1.00653900 |
| H             | -0.14783800 | -1.29595600 | -1.86289900 | C | 1.77657200  | 0.42213900  | 0.01134100  |
| <b>N11_TS</b> |             |             |             | F | 1.08782000  | 1.48787200  | -2.00516200 |
| B             | 0.22142500  | -0.02444500 | 0.30827400  | C | 2.05535400  | 1.21486600  | -1.11148000 |
| N             | -2.22279400 | -1.63742100 | 0.40147700  | F | 3.47170900  | 2.47374000  | -2.51909700 |
| C             | -1.26834400 | -1.90267600 | 1.49467400  | C | 3.30125600  | 1.73735600  | -1.42344800 |
| H             | -0.65955400 | -2.74321300 | 1.13892600  | F | 5.57583400  | 1.97933900  | -0.85398400 |
| C             | -0.31482400 | -0.71517700 | 1.71288000  | C | 4.37309400  | 1.48825400  | -0.57982500 |
| H             | -0.93825300 | 0.06823500  | 2.16935500  | F | 5.18149400  | 0.42862500  | 1.35804200  |
| C             | 0.48565800  | -1.26832200 | 2.90507600  | C | 4.16730400  | 0.70120700  | 0.53896700  |
| H             | 1.18403600  | -2.04481800 | 2.58103500  | F | 2.83449100  | -0.58004500 | 1.89567200  |
| H             | 1.06241000  | -0.49881300 | 3.41802400  | C | 2.89858300  | 0.19682100  | 0.80664500  |
| C             | -0.59680600 | -1.89292800 | 3.81858100  | H | -1.10552400 | -1.15933600 | -0.44015000 |
| H             | -0.21408800 | -2.76426300 | 4.35488200  | C | 1.85028200  | -5.13863900 | -1.06037700 |
| H             | -0.91763300 | -1.17028800 | 4.57371300  | C | 0.86078400  | -4.87976200 | -2.00400400 |
|               |             |             |             | C | 0.25134400  | -3.62922400 | -2.04903000 |

|   |             |             |             |
|---|-------------|-------------|-------------|
| C | 0.60823300  | -2.60981300 | -1.15765500 |
| C | 1.60585300  | -2.88683700 | -0.21632300 |
| C | 2.21890100  | -4.13578800 | -0.16869400 |
| H | 2.32792500  | -6.11207300 | -1.01874200 |
| H | 0.56146500  | -5.65009500 | -2.70791800 |
| H | -0.51954000 | -3.43582300 | -2.79256800 |
| H | 1.90271000  | -2.13057400 | 0.50043500  |
| H | 2.98772800  | -4.32256700 | 0.57457300  |
| C | -0.08953200 | -1.27386500 | -1.25398400 |
| H | -0.92183100 | -1.37784700 | -1.96578900 |
| H | 0.50064000  | -0.53242300 | -1.78684400 |

# N11\_P

|   |             |             |             |
|---|-------------|-------------|-------------|
| B | -0.15414700 | 0.08760100  | -0.24540700 |
| N | -3.33355400 | 1.21816900  | 0.05315400  |
| C | -2.39698800 | 1.48295400  | -1.11962000 |
| H | -1.90255700 | 2.41404200  | -0.83207200 |
| C | -1.37122700 | 0.36313300  | -1.34433500 |
| H | -1.96414600 | -0.56122300 | -1.35685700 |
| C | -0.93760100 | 0.57375800  | -2.82353300 |
| H | 0.09894800  | 0.90993400  | -2.89504600 |
| H | -0.99793100 | -0.37321300 | -3.36700100 |
| C | -1.90171800 | 1.62574100  | -3.42436900 |
| H | -1.41776800 | 2.60620200  | -3.43039800 |
| H | -2.20750600 | 1.40056100  | -4.44811400 |
| C | -3.09987300 | 1.66880200  | -2.46316900 |
| H | -3.76762900 | 0.82046100  | -2.65957400 |
| H | -3.67920900 | 2.59333600  | -2.54671200 |
| C | -4.24270400 | 2.38110100  | 0.30710900  |
| H | -4.94311900 | 2.41746000  | -0.53241800 |
| H | -3.62363200 | 3.28071300  | 0.28278400  |
| C | -4.97396300 | 2.21935600  | 1.63276700  |
| H | -5.62531400 | 3.08565800  | 1.77597400  |
| H | -4.24394200 | 2.23054100  | 2.45235200  |
| C | -5.76971500 | 0.91442700  | 1.65751700  |
| H | -6.24525500 | 0.77661000  | 2.63154400  |
| H | -6.57197100 | 0.96330400  | 0.91041600  |
| C | -4.84820300 | -0.26281200 | 1.34242000  |
| H | -4.11208600 | -0.39272100 | 2.14676300  |
| H | -5.40833500 | -1.19929500 | 1.27903500  |
| C | -4.10548300 | -0.07001700 | 0.02491300  |
| H | -3.39278500 | -0.87798200 | -0.13113600 |
| H | -4.79175000 | -0.01231200 | -0.82441600 |
| C | 0.19697500  | -1.50858200 | -0.51097100 |

|   |             |             |             |
|---|-------------|-------------|-------------|
| F | 2.02802900  | -1.09628300 | -1.97038600 |
| C | 1.20892300  | -1.96327400 | -1.35599700 |
| F | 2.43963000  | -3.66106300 | -2.45270800 |
| C | 1.44280700  | -3.30320800 | -1.64251700 |
| F | 0.82027200  | -5.56538200 | -1.36784500 |
| C | 0.61815600  | -4.27632600 | -1.09900400 |
| F | -1.26330200 | -4.79422400 | 0.22640800  |
| C | -0.43249800 | -3.88243200 | -0.28671800 |
| F | -1.71514200 | -2.24112900 | 0.71884200  |
| C | -0.62020500 | -2.52974800 | -0.03629800 |
| C | 1.18020700  | 1.05003300  | -0.40564700 |
| F | 2.57674400  | -0.56048500 | 0.63822300  |
| C | 2.41660600  | 0.66334400  | 0.12033200  |
| F | 4.67817600  | 1.04300000  | 0.69841100  |
| C | 3.53721500  | 1.48024300  | 0.16515300  |
| F | 4.52723500  | 3.57494200  | -0.30037000 |
| C | 3.46448100  | 2.77201200  | -0.33666900 |
| F | 2.16571300  | 4.45036500  | -1.36509600 |
| C | 2.26739300  | 3.21199400  | -0.87329100 |
| F | 0.04846200  | 2.88833100  | -1.42462600 |
| C | 1.17416900  | 2.35179200  | -0.88935500 |
| H | -2.69827500 | 1.13880700  | 0.85841600  |
| C | 2.26831100  | -0.54059200 | 4.33146400  |
| C | 2.17407700  | 0.75017400  | 3.81966700  |
| C | 1.19917300  | 1.05801300  | 2.87526600  |
| C | 0.31090600  | 0.08267100  | 2.41057800  |
| C | 0.40661100  | -1.20630700 | 2.94637400  |
| C | 1.37417600  | -1.51557100 | 3.89597800  |
| H | 3.02918900  | -0.78393100 | 5.06588000  |
| H | 2.86138000  | 1.52086400  | 4.15520000  |
| H | 1.13583300  | 2.06729600  | 2.47301100  |
| H | -0.28986800 | -1.97004300 | 2.61153500  |
| H | 1.43311200  | -2.52378400 | 4.29465700  |
| C | -0.67698900 | 0.38752300  | 1.31893400  |
| H | -0.90532800 | 1.46831600  | 1.37201900  |
| H | -1.59490600 | -0.17666400 | 1.53956100  |

# N12\_TS

|   |            |             |             |
|---|------------|-------------|-------------|
| N | 1.52827300 | -2.43251100 | 0.39603100  |
| H | 0.63190500 | -1.54232700 | -0.40100100 |
| B | 0.11047800 | 0.14972800  | 0.24515100  |
| C | 1.76619800 | -1.46815500 | 1.50616000  |
| H | 2.60393200 | -0.84006900 | 1.16610200  |
| C | 0.53351100 | -0.56637100 | 1.64669400  |

|   |             |             |             |              |             |             |             |
|---|-------------|-------------|-------------|--------------|-------------|-------------|-------------|
| H | -0.28342300 | -1.19915600 | 2.01557900  | C            | -3.86306600 | 2.22857200  | 0.10818500  |
| C | 2.79457900  | -2.88666600 | -0.21967100 | F            | -5.03501000 | 2.85155500  | 0.05130400  |
| H | 3.36379700  | -3.46705800 | 0.52478200  | C            | -3.55381000 | 1.40894800  | 1.18059100  |
| H | 3.38058700  | -2.00543300 | -0.48010400 | F            | -4.43595400 | 1.24105400  | 2.16469800  |
| C | 2.54799300  | -3.75499200 | -1.44859900 | C            | -2.32309200 | 0.76460200  | 1.22323900  |
| H | 2.05251800  | -3.15624300 | -2.22254800 | F            | -2.14026600 | -0.01893100 | 2.30139700  |
| H | 3.51414800  | -4.06595000 | -1.85794700 | C            | -3.97093900 | -3.22149400 | -1.46360000 |
| C | 1.68818700  | -4.96547200 | -1.09064900 | C            | -3.26050700 | -2.91690300 | -2.62216800 |
| H | 2.25115800  | -5.61480600 | -0.40670700 | C            | -2.06136000 | -2.21715600 | -2.54033700 |
| H | 1.46065100  | -5.55742300 | -1.98177400 | C            | -1.54356900 | -1.80487000 | -1.30665600 |
| C | 0.40346300  | -4.50037800 | -0.40928200 | C            | -2.27087400 | -2.11285300 | -0.15462800 |
| H | -0.22366800 | -3.95508400 | -1.12257000 | C            | -3.47209700 | -2.81497800 | -0.23075400 |
| H | -0.18607900 | -5.35339000 | -0.05916100 | H            | -4.90596500 | -3.76894000 | -1.52268200 |
| C | 0.72072900  | -3.61074100 | 0.78945700  | H            | -3.63908500 | -3.22604500 | -3.59138900 |
| H | -0.19973700 | -3.25966500 | 1.26290000  | H            | -1.50965400 | -1.98536800 | -3.44835300 |
| H | 1.27919300  | -4.20145500 | 1.53107100  | H            | -1.90922900 | -1.79144000 | 0.81622000  |
| C | 2.17051400  | -2.11535100 | 2.83510100  | H            | -4.01858400 | -3.04016300 | 0.67969800  |
| H | 1.35487500  | -2.75651800 | 3.19181500  | C            | -0.21467100 | -1.08284300 | -1.28847900 |
| H | 3.05233000  | -2.75405900 | 2.70251100  | H            | 0.47808000  | -1.62060400 | -1.95270500 |
| C | 2.43319400  | -1.04637000 | 3.89670900  | H            | -0.28198200 | -0.13232500 | -1.82118500 |
| H | 2.71178100  | -1.52197100 | 4.84241900  |              |             |             |             |
| H | 3.28571800  | -0.42551100 | 3.58997400  | <b>N12_P</b> |             |             |             |
| C | 1.20064200  | -0.16003400 | 4.07399000  | N            | 2.37982800  | -0.33172200 | 0.81948100  |
| H | 1.39261500  | 0.61438700  | 4.82379800  | H            | 1.94528000  | -0.21962900 | -0.10554800 |
| H | 0.36573600  | -0.76748800 | 4.44903200  | B            | -0.59063100 | -0.30560600 | -0.22207300 |
| C | 0.80305200  | 0.48196200  | 2.74496500  | C            | 1.22516600  | -0.48547800 | 1.83160100  |
| H | 1.62168000  | 1.14026500  | 2.42231900  | H            | 1.03018100  | 0.54960100  | 2.13886300  |
| H | -0.07522000 | 1.11896900  | 2.87733400  | C            | -0.08346500 | -1.02655100 | 1.22986100  |
| C | 1.28423600  | 1.16178700  | -0.27945800 | H            | 0.07433800  | -2.09655500 | 1.04330100  |
| C | 1.31864700  | 2.47805700  | 0.18460900  | C            | 3.14531700  | 0.92438000  | 1.14088800  |
| F | 0.37722900  | 2.91817400  | 1.03247800  | H            | 3.53897900  | 0.77735200  | 2.15214300  |
| C | 2.29217900  | 3.40051700  | -0.17219100 | H            | 2.41554800  | 1.73582800  | 1.16462500  |
| F | 2.26585300  | 4.63825700  | 0.31724300  | C            | 4.26976000  | 1.20651200  | 0.15784900  |
| C | 3.30334500  | 3.02370800  | -1.04473900 | H            | 3.85078800  | 1.42387000  | -0.83120400 |
| F | 4.24763100  | 3.88986200  | -1.39746600 | H            | 4.78312500  | 2.11305200  | 0.49203100  |
| C | 3.31758100  | 1.72911600  | -1.53674300 | C            | 5.21957500  | 0.01503400  | 0.06967700  |
| F | 4.28007100  | 1.34110500  | -2.37282300 | H            | 5.71025400  | -0.14530600 | 1.03866400  |
| C | 2.32087900  | 0.84214300  | -1.14699400 | H            | 6.00602600  | 0.20630000  | -0.66466100 |
| F | 2.41543000  | -0.39767900 | -1.67459000 | C            | 4.41100600  | -1.21579200 | -0.32643200 |
| C | -1.35014900 | 0.87710200  | 0.23089300  | H            | 3.96589100  | -1.05509000 | -1.31233700 |
| C | -1.71889700 | 1.71832300  | -0.82204000 | H            | 5.03299000  | -2.11232700 | -0.40445700 |
| F | -0.87623000 | 1.91905400  | -1.85189900 | C            | 3.30382700  | -1.51395400 | 0.67921300  |
| C | -2.93357100 | 2.38147200  | -0.90951000 | H            | 2.69296500  | -2.36824300 | 0.37484100  |
| F | -3.20901500 | 3.16307500  | -1.95144700 | H            | 3.73292400  | -1.70319200 | 1.66525400  |

|   |             |             |             |   |             |             |             |
|---|-------------|-------------|-------------|---|-------------|-------------|-------------|
| C | 1.71269600  | -1.25500100 | 3.06047000  | H | 1.38845300  | -5.41673200 | -0.33801400 |
| H | 1.87291800  | -2.30697800 | 2.79320100  | C | -0.26257000 | -1.23659600 | -1.59809500 |
| H | 2.66790000  | -0.85613700 | 3.42624700  | H | -0.12449200 | -0.57334100 | -2.45744700 |
| C | 0.66316300  | -1.17970600 | 4.16827300  | H | -1.19091300 | -1.77761800 | -1.80292500 |
| H | 1.00447100  | -1.75116500 | 5.03690500  |   |             |             |             |
| H | 0.55353800  | -0.13657200 | 4.49331300  |   | N13_TS      |             |             |
| C | -0.67410500 | -1.69553300 | 3.65052600  | N | -2.31005900 | -0.77451800 | 0.98779700  |
| H | -1.44108600 | -1.60372000 | 4.42653500  | H | -0.80274800 | -0.50175300 | 1.14989800  |
| H | -0.58321400 | -2.76490100 | 3.41637100  | B | 0.20148600  | -0.18934200 | -0.22269700 |
| C | -1.10403200 | -0.93678600 | 2.39403200  | C | -2.36868100 | -0.52987500 | -0.48998800 |
| H | -1.27183300 | 0.11626300  | 2.64949400  | H | -2.47149100 | 0.55808600  | -0.57784500 |
| H | -2.06475600 | -1.32856300 | 2.06663600  | C | -1.00196900 | -0.91273300 | -1.04402100 |
| C | 0.07405600  | 1.23182200  | -0.32119300 | H | -0.93029800 | -0.56769200 | -2.08264000 |
| C | -0.34513800 | 2.25736200  | 0.53098400  | H | -0.87585000 | -1.99628200 | -1.07593000 |
| F | -1.31500800 | 2.02449500  | 1.42651800  | C | -2.50047100 | -2.20315600 | 1.33351100  |
| C | 0.15707600  | 3.55146300  | 0.52158700  | H | -1.75158800 | -2.78794600 | 0.78818100  |
| F | -0.31007600 | 4.47163600  | 1.36289800  | H | -3.49208100 | -2.52664200 | 0.98591400  |
| C | 1.15700700  | 3.89255300  | -0.38207400 | C | -2.39743500 | -2.46460300 | 2.83577300  |
| F | 1.66320400  | 5.12203000  | -0.40131700 | H | -1.37522900 | -2.28914900 | 3.18563000  |
| C | 1.62653900  | 2.91871700  | -1.24542200 | H | -2.61250600 | -3.52338700 | 3.01002600  |
| F | 2.63284300  | 3.18499100  | -2.08322300 | C | -3.36853900 | -1.57862000 | 3.61406100  |
| C | 1.08626900  | 1.63729300  | -1.18297600 | H | -4.39942200 | -1.86552800 | 3.36772900  |
| F | 1.73112600  | 0.72825000  | -1.96128900 | H | -3.24255500 | -1.72280000 | 4.69093300  |
| C | -2.24831300 | -0.19317700 | -0.28745600 | C | -3.15314200 | -0.11598200 | 3.23148500  |
| C | -3.03433900 | 0.89595300  | -0.65591600 | H | -3.88742200 | 0.52963500  | 3.72284500  |
| F | -2.49391600 | 2.09276600  | -0.94558700 | H | -2.16247500 | 0.22300400  | 3.55703800  |
| C | -4.42127100 | 0.84927000  | -0.78112500 | C | -3.27782200 | 0.06371400  | 1.72314500  |
| F | -5.10143800 | 1.94239200  | -1.13104500 | H | -4.29808000 | -0.20539600 | 1.40481000  |
| C | -5.09617800 | -0.33755300 | -0.55792900 | H | -3.10027000 | 1.10516700  | 1.44153900  |
| F | -6.42121300 | -0.39946900 | -0.67532600 | C | -3.57510900 | -1.14034100 | -1.18147600 |
| C | -4.36417100 | -1.46665400 | -0.21895700 | C | -4.74545100 | -0.38712400 | -1.31093000 |
| F | -4.98590400 | -2.62902100 | -0.01071000 | H | -4.76228300 | 0.63509400  | -0.93964400 |
| C | -2.98654600 | -1.36548200 | -0.11158800 | C | -5.87891700 | -0.91798400 | -1.92044600 |
| F | -2.34280900 | -2.51704100 | 0.18632700  | H | -6.77575600 | -0.31379500 | -2.01330900 |
| C | 2.73005300  | -4.37622900 | -1.66646400 | C | -5.85596000 | -2.21785800 | -2.41615300 |
| C | 2.90770700  | -3.22914000 | -2.43144000 | H | -6.73590500 | -2.63563000 | -2.89445000 |
| C | 1.96081700  | -2.20327300 | -2.40171300 | C | -4.69366300 | -2.97666900 | -2.30366600 |
| C | 0.80685000  | -2.29703100 | -1.61438100 | H | -4.66417000 | -3.98798400 | -2.69656700 |
| C | 0.61973600  | -3.49134700 | -0.89256700 | C | -3.56309000 | -2.44094500 | -1.69487700 |
| C | 1.56722100  | -4.50779800 | -0.90498800 | H | -2.66129200 | -3.04174900 | -1.62446700 |



|              |             |             |             |   |             |             |             |
|--------------|-------------|-------------|-------------|---|-------------|-------------|-------------|
| F            | 5.01785400  | 0.47384500  | -1.49840100 | H | -3.63265300 | 1.84950600  | -1.89478500 |
| C            | 4.21851600  | -1.73402000 | -1.38848800 | C | -2.93444200 | 0.55155800  | -3.49592300 |
| F            | 5.41756100  | -2.20899900 | -1.71125100 | H | -2.01403000 | 0.01246300  | -3.75195400 |
| C            | 3.16470900  | -2.59975600 | -1.14030500 | H | -3.07471900 | 1.32053300  | -4.26046300 |
| F            | 3.35251600  | -3.91818900 | -1.20708600 | C | -4.11692500 | -0.41644300 | -3.46013900 |
| C            | 1.92443800  | -2.07838200 | -0.80129200 | H | -5.04702200 | 0.14581700  | -3.30643300 |
| F            | 0.98544800  | -2.99213600 | -0.47787900 | H | -4.20977500 | -0.93810400 | -4.41590400 |
| C            | -0.05771200 | 1.41780400  | -0.26435800 | C | -3.93039000 | -1.42030900 | -2.32371400 |
| C            | -0.62290000 | 2.21594000  | 0.72115000  | H | -4.80187700 | -2.07382500 | -2.22668800 |
| F            | -0.87809400 | 1.72132100  | 1.95471100  | H | -3.06618600 | -2.06323300 | -2.51997700 |
| C            | -0.96018900 | 3.55351200  | 0.54424600  | C | -3.72653800 | -0.70948500 | -0.99244500 |
| F            | -1.49537600 | 4.25217400  | 1.54524300  | H | -4.60490700 | -0.12172600 | -0.70899300 |
| C            | -0.74647600 | 4.15061100  | -0.68676600 | H | -3.50058800 | -1.41670300 | -0.18919600 |
| F            | -1.06500300 | 5.42639600  | -0.88136800 | C | -3.34191500 | 1.82749500  | 0.74772800  |
| C            | -0.19727300 | 3.39628200  | -1.71576200 | C | -4.38644600 | 1.35858400  | 1.54964800  |
| F            | 0.00925800  | 3.95227400  | -2.90697700 | H | -4.39345700 | 0.31598100  | 1.86007700  |
| C            | 0.11794900  | 2.06550800  | -1.48824700 | C | -5.40206300 | 2.21025800  | 1.97488100  |
| F            | 0.62464500  | 1.38456200  | -2.52512500 | H | -6.19936000 | 1.82906500  | 2.60436900  |
| C            | 4.41332300  | 0.43976400  | 2.57156200  | C | -5.38271400 | 3.55070000  | 1.60248900  |
| C            | 4.09438400  | -0.90189400 | 2.37458300  | H | -6.16910700 | 4.22012100  | 1.93536500  |
| C            | 2.78042700  | -1.27271500 | 2.11528800  | C | -4.34074300 | 4.03405200  | 0.81480900  |
| C            | 1.76084700  | -0.31702600 | 2.03591900  | H | -4.31167600 | 5.08216300  | 0.53528800  |
| C            | 2.08358700  | 1.01869500  | 2.28068100  | C | -3.32446400 | 3.18114300  | 0.39579700  |
| C            | 3.40083200  | 1.39238000  | 2.53682100  | H | -2.50367300 | 3.57619300  | -0.19505400 |
| H            | 5.43935000  | 0.73680400  | 2.76181100  | C | 1.82900200  | 0.85240900  | 0.42152200  |
| H            | 4.86949100  | -1.66094700 | 2.41690800  | C | 2.85032900  | 0.00239000  | 0.84193900  |
| H            | 2.53929200  | -2.31951700 | 1.94643900  | F | 2.63693800  | -1.31788800 | 0.96039100  |
| H            | 1.30835600  | 1.77392600  | 2.27433200  | C | 4.13841700  | 0.42509300  | 1.14119600  |
| H            | 3.63293800  | 2.43881900  | 2.70739000  | F | 5.06666400  | -0.44521700 | 1.54122200  |
| C            | 0.35973600  | -0.79187700 | 1.70458300  | C | 4.46482300  | 1.76647800  | 1.01334500  |
| H            | 0.36245900  | -1.88195800 | 1.61927200  | F | 5.69603000  | 2.19309300  | 1.29321400  |
| H            | -0.25022600 | -0.53975500 | 2.58244600  | C | 3.49192000  | 2.65590400  | 0.58854700  |
|              |             |             |             | F | 3.78787300  | 3.95060000  | 0.44295500  |
|              |             |             |             | C | 2.21678200  | 2.18295400  | 0.30325300  |
| <b>N13_P</b> |             |             |             | F | 1.35186600  | 3.11050600  | -0.16386000 |
| N            | -2.57807900 | 0.25041600  | -1.05313500 | C | -0.05844700 | -1.12384200 | 0.52648900  |
| H            | -1.73981800 | -0.29441500 | -1.29540500 | C | -0.70713800 | -2.17424000 | -0.10772000 |
| B            | 0.37749500  | 0.33234200  | -0.15175100 | F | -0.97028400 | -2.12203500 | -1.44858900 |
| C            | -2.24801000 | 0.87035900  | 0.31917400  | C | -1.19436400 | -3.31819400 | 0.51779500  |
| H            | -2.28851100 | -0.00036200 | 0.98243900  | F | -1.83500400 | -4.25416700 | -0.18759200 |
| C            | -0.82163800 | 1.40397600  | 0.30556100  | C | -1.03500100 | -3.45323800 | 1.88494800  |
| H            | -0.63092600 | 1.72546100  | 1.33738800  | F | -1.49658200 | -4.52756500 | 2.52014100  |
| H            | -0.76358300 | 2.31593700  | -0.29642300 | C | -0.40181600 | -2.43360700 | 2.58664600  |
| C            | -2.75487800 | 1.25145700  | -2.15408100 | F | -0.25495900 | -2.53975800 | 3.90567000  |
| H            | -1.86936900 | 1.89016800  | -2.14435600 |   |             |             |             |

|               |             |             |             |   |             |             |             |
|---------------|-------------|-------------|-------------|---|-------------|-------------|-------------|
| C             | 0.05029700  | -1.31037300 | 1.90867900  | C | 5.46554800  | 0.07541200  | 2.59731300  |
| F             | 0.61240200  | -0.36036600 | 2.66632800  | H | 6.36370700  | 0.68405500  | 2.57088000  |
| C             | 4.41524000  | -1.46406500 | -2.80233400 | C | 5.34642200  | -0.95628100 | 3.52331500  |
| C             | 4.26043800  | -0.08027700 | -2.79373600 | H | 6.15252600  | -1.15975800 | 4.22073700  |
| C             | 3.01912800  | 0.48121600  | -2.51322900 | C | 4.18125800  | -1.71828500 | 3.55849800  |
| C             | 1.90669700  | -0.31805300 | -2.22430000 | H | 4.07631300  | -2.51727900 | 4.28546200  |
| C             | 2.07645600  | -1.70612600 | -2.24875900 | C | 3.14346000  | -1.45377000 | 2.67018400  |
| C             | 3.31494800  | -2.27320700 | -2.53501100 | H | 2.23688400  | -2.04972900 | 2.71856600  |
| H             | 5.38305300  | -1.90695900 | -3.01447900 | C | -1.92450700 | -0.00969600 | 0.50008600  |
| H             | 5.10861900  | 0.56469100  | -3.00339900 | C | -2.93092200 | 0.57518800  | -0.27019800 |
| H             | 2.90701900  | 1.56319400  | -2.49748200 | F | -2.61534200 | 1.24562300  | -1.39337700 |
| H             | 1.22872800  | -2.35018000 | -2.03724200 | C | -4.28398500 | 0.50301600  | 0.02763000  |
| H             | 3.42189600  | -3.35381700 | -2.54106300 | F | -5.18697900 | 1.08118700  | -0.76158800 |
| C             | 0.60023300  | 0.31262500  | -1.80788600 | C | -4.68956700 | -0.17200000 | 1.16921300  |
| H             | 0.61872700  | 1.36783900  | -2.11684000 | F | -5.97879500 | -0.25771100 | 1.47851300  |
| H             | -0.20288300 | -0.16242100 | -2.38801500 | C | -3.73302100 | -0.76662800 | 1.97631200  |
| <b>N14_TS</b> |             |             |             | F | -4.10487900 | -1.42215000 | 3.07457300  |
| B             | -0.35750300 | 0.16894000  | 0.10302300  | C | -2.38939700 | -0.66781300 | 1.63634900  |
| N             | 2.25489900  | -0.87876700 | -0.55589100 | F | -1.54203800 | -1.28489900 | 2.47610300  |
| H             | 0.80642600  | -0.72869900 | -0.96555300 | C | -0.04693500 | 1.71256500  | -0.33071500 |
| C             | 2.14952800  | -0.11930600 | 0.73144100  | C | 0.56667400  | 2.18255800  | -1.48526400 |
| H             | 2.27378700  | 0.92990600  | 0.43809500  | F | 0.96804900  | 1.33137100  | -2.45339800 |
| C             | 0.71821900  | -0.29911500 | 1.22590200  | C | 0.83237200  | 3.52529800  | -1.73046800 |
| H             | 0.56496100  | 0.32450800  | 2.11490000  | F | 1.42882800  | 3.89909000  | -2.86176400 |
| H             | 0.56382600  | -1.32663600 | 1.56104200  | C | 0.47720500  | 4.47373200  | -0.78524800 |
| C             | 2.47335300  | -2.33073700 | -0.36882200 | F | 0.72317500  | 5.76285900  | -0.99652100 |
| H             | 1.68831800  | -2.71447900 | 0.28986900  | C | -0.12870500 | 4.05886900  | 0.39252700  |
| H             | 3.44007800  | -2.48964700 | 0.13150500  | F | -0.46660600 | 4.95523600  | 1.31600600  |
| C             | 2.46001500  | -3.07541700 | -1.70126000 | C | -0.36965500 | 2.70673100  | 0.59363800  |
| H             | 2.64229000  | -4.13623700 | -1.50437100 | F | -0.94010500 | 2.37090400  | 1.76043600  |
| H             | 1.46595600  | -3.00551600 | -2.15673000 | C | -1.99023100 | -4.89268600 | -1.46933100 |
| C             | 3.51187200  | -2.50601400 | -2.65152400 | C | -1.84318900 | -4.19272300 | -2.66460800 |
| H             | 4.51327800  | -2.69029000 | -2.23999800 | C | -1.31691800 | -2.90651800 | -2.65663500 |
| H             | 3.46595700  | -3.00607800 | -3.62331900 | C | -0.92673600 | -2.28544100 | -1.46304800 |
| C             | 3.30417200  | -1.00062800 | -2.80731100 | C | -1.08420300 | -2.99854200 | -0.27260200 |
| H             | 4.09781800  | -0.55437300 | -3.41444900 | C | -1.60994400 | -4.28969600 | -0.27607400 |
| H             | 2.35833100  | -0.80057800 | -3.32525300 | H | -2.39920900 | -5.89775800 | -1.46958400 |
| C             | 3.28923700  | -0.31563200 | -1.44581800 | H | -2.13857000 | -4.64862300 | -3.60442100 |
| H             | 3.09072200  | 0.75342200  | -1.55709200 | H | -1.20304400 | -2.36689100 | -3.59408300 |
| H             | 4.27434800  | -0.43360200 | -0.96571600 | H | -0.81358600 | -2.54618100 | 0.67449800  |
| C             | 3.25290800  | -0.42662200 | 1.72812900  | H | -1.72425900 | -4.82058400 | 0.66381500  |
| C             | 4.42468500  | 0.33560900  | 1.71040200  | C | -0.34479500 | -0.89158900 | -1.55087700 |
| H             | 4.51432600  | 1.15508100  | 1.00083900  | H | 0.31678900  | -0.85862000 | -2.42832000 |
|               |             |             |             | H | -1.09784000 | -0.16536700 | -1.86286500 |

**N14\_P**

|   |             |             |             |
|---|-------------|-------------|-------------|
| B | -0.57808600 | -0.16370000 | -0.23015600 |
| N | 2.45693400  | -0.02562300 | -0.41365700 |
| H | 1.68741100  | 0.20068500  | -1.05819100 |
| C | 1.82349500  | 0.06376300  | 0.98592200  |
| H | 1.67201400  | 1.14238900  | 1.10242600  |
| C | 0.45799100  | -0.61531000 | 0.99119600  |
| H | 0.02242900  | -0.33524500 | 1.95598600  |
| H | 0.57949800  | -1.70234700 | 1.03324400  |
| C | 2.92416200  | -1.40125300 | -0.78830600 |
| H | 2.08648900  | -2.08309400 | -0.62142300 |
| H | 3.73968300  | -1.64899300 | -0.10330500 |
| C | 3.39279700  | -1.42909700 | -2.23657500 |
| H | 3.72060500  | -2.44732500 | -2.46393800 |
| H | 2.54207800  | -1.22048500 | -2.89623700 |
| C | 4.50366900  | -0.40767500 | -2.47654800 |
| H | 5.38752400  | -0.67829100 | -1.88476800 |
| H | 4.80565900  | -0.41130500 | -3.52693800 |
| C | 4.02048000  | 0.98469000  | -2.07081700 |
| H | 4.82064200  | 1.72453900  | -2.16196600 |
| H | 3.20422200  | 1.30996000  | -2.72529400 |
| C | 3.52826200  | 0.99721800  | -0.62948800 |
| H | 3.09491600  | 1.96499400  | -0.36032000 |
| H | 4.33019900  | 0.76033300  | 0.07679500  |
| C | 2.81046800  | -0.38170000 | 2.04617400  |
| C | 3.58908500  | 0.57462500  | 2.70432700  |
| H | 3.46956700  | 1.62572000  | 2.45064800  |
| C | 4.49612300  | 0.20387900  | 3.69309100  |
| H | 5.08454000  | 0.96274300  | 4.19829000  |
| C | 4.63475600  | -1.13652700 | 4.03822800  |
| H | 5.33666200  | -1.43092100 | 4.81165200  |
| C | 3.85681400  | -2.09851200 | 3.39816700  |
| H | 3.94967300  | -3.14397200 | 3.67348000  |
| C | 2.94732600  | -1.72432300 | 2.41456000  |
| H | 2.33254300  | -2.48280200 | 1.93913700  |
| C | -2.16282800 | -0.41012600 | 0.17072100  |
| C | -3.15669700 | 0.17249800  | -0.61550600 |
| F | -2.81598100 | 0.91813300  | -1.68333500 |
| C | -4.51852500 | 0.04134700  | -0.38057600 |
| F | -5.41026400 | 0.63408900  | -1.17608700 |
| C | -4.95016900 | -0.71326000 | 0.69990200  |
| F | -6.25106900 | -0.85820400 | 0.94675400  |
| C | -4.00768900 | -1.32362300 | 1.51153000  |

|   |             |             |             |
|---|-------------|-------------|-------------|
| F | -4.40368700 | -2.06496800 | 2.54820500  |
| C | -2.65566600 | -1.15332600 | 1.23710800  |
| F | -1.81544500 | -1.80453800 | 2.06860400  |
| C | -0.40039300 | 1.49827700  | -0.35641000 |
| C | 0.24935000  | 2.22032100  | -1.35059200 |
| F | 0.84895800  | 1.58444800  | -2.39499100 |
| C | 0.41358700  | 3.60214900  | -1.35763500 |
| F | 1.07154800  | 4.20173300  | -2.35205100 |
| C | -0.10352600 | 4.34840200  | -0.31318200 |
| F | 0.03948100  | 5.67107000  | -0.28825100 |
| C | -0.74900200 | 3.68777000  | 0.72395100  |
| F | -1.22652800 | 4.38638500  | 1.75215400  |
| C | -0.87308100 | 2.30476700  | 0.68455800  |
| F | -1.46435500 | 1.74723900  | 1.75195900  |
| C | 0.15261300  | -5.26716500 | -1.79828600 |
| C | 0.56880400  | -4.46165400 | -2.85572800 |
| C | 0.38565300  | -3.08460200 | -2.79377000 |
| C | -0.20843200 | -2.46173400 | -1.68427000 |
| C | -0.63127000 | -3.29218600 | -0.63907600 |
| C | -0.45208200 | -4.67430300 | -0.69555000 |
| H | 0.29282100  | -6.34265000 | -1.83750700 |
| H | 1.03040500  | -4.90650200 | -3.73243200 |
| H | 0.69550300  | -2.46797700 | -3.63553500 |
| H | -1.09758000 | -2.86412700 | 0.23953300  |
| H | -0.79049200 | -5.28830200 | 0.13371400  |
| C | -0.34510900 | -0.94913100 | -1.67900100 |
| H | 0.49843000  | -0.57700500 | -2.27382700 |
| H | -1.20324800 | -0.68584000 | -2.31222800 |

**N15\_TS**

|   |             |             |             |
|---|-------------|-------------|-------------|
| N | 2.37549200  | -0.19338500 | -0.77524400 |
| B | -0.39630900 | 0.00649100  | 0.00631200  |
| C | 2.12019600  | 0.25410800  | 0.63247900  |
| H | 1.98119800  | 1.33881400  | 0.55428000  |
| C | 0.78548100  | -0.35590300 | 1.05295100  |
| H | 0.51263900  | 0.03257300  | 2.03997900  |
| H | 0.88573500  | -1.43812300 | 1.17679400  |
| C | 2.95933700  | -1.55359300 | -0.90392300 |
| C | 4.48262200  | -1.67120100 | -0.83588000 |
| H | 4.97094300  | -1.14599100 | -1.66073600 |
| H | 4.74638100  | -2.72868500 | -0.92251800 |
| C | 3.11995900  | 0.48782200  | -3.07104000 |
| H | 2.11206600  | 0.41899200  | -3.48427700 |
| H | 3.64785100  | -0.44513000 | -3.28205300 |

|   |             |             |             |              |             |             |             |
|---|-------------|-------------|-------------|--------------|-------------|-------------|-------------|
| C | 3.08536400  | 0.81471100  | -1.58333100 | C            | -0.08050000 | -2.40180000 | -1.76853800 |
| C | 3.28155500  | 0.02162600  | 1.58044900  | C            | -0.30047000 | -3.21497300 | -0.65232000 |
| C | 4.31517500  | 0.96103100  | 1.64906300  | C            | -0.23649700 | -4.60341600 | -0.75690500 |
| H | 4.23775300  | 1.88148500  | 1.07479300  | H            | 0.09676300  | -6.29147500 | -2.05147400 |
| C | 5.43689500  | 0.73524500  | 2.44085500  | H            | 0.49220200  | -4.87053900 | -4.05514800 |
| H | 6.23053100  | 1.47475000  | 2.47878800  | H            | 0.38549000  | -2.41575700 | -3.86781200 |
| C | 5.53534900  | -0.43482200 | 3.18973300  | H            | -0.51823100 | -2.77814000 | 0.31389100  |
| H | 6.40896200  | -0.61581600 | 3.80758300  | H            | -0.41181800 | -5.21072500 | 0.12570300  |
| C | 4.49743400  | -1.36191000 | 3.15632200  | C            | -0.11959100 | -0.88987000 | -1.74369000 |
| H | 4.55695000  | -2.26672400 | 3.75279300  | H            | 0.39352800  | -0.52373000 | -2.64088700 |
| C | 3.37756300  | -1.13207200 | 2.36254600  | H            | -1.12063600 | -0.49711200 | -1.92069900 |
| H | 2.57397400  | -1.86165400 | 2.35367700  |              |             |             |             |
| C | -1.88250400 | -0.53736300 | 0.39579200  | <b>N15_P</b> |             |             |             |
| C | -3.00828200 | -0.13866500 | -0.32707000 | N            | -2.64115700 | -0.22771700 | 0.56331800  |
| F | -2.86421600 | 0.61303000  | -1.43301600 | B            | 0.63760700  | -0.05926100 | 0.30104600  |
| C | -4.31126800 | -0.48285200 | 0.00388300  | C            | -1.90868200 | 0.30299900  | -0.68712100 |
| F | -5.33419200 | -0.06859600 | -0.74050900 | H            | -1.75795700 | 1.36354900  | -0.46313100 |
| C | -4.54032300 | -1.25607600 | 1.13206300  | C            | -0.55968500 | -0.39511400 | -0.80263700 |
| F | -5.77766800 | -1.59672700 | 1.47500000  | H            | -0.16962500 | -0.10595100 | -1.78671000 |
| C | -3.46031400 | -1.68098200 | 1.88991600  | H            | -0.72335200 | -1.47370800 | -0.87772800 |
| F | -3.66222700 | -2.43224900 | 2.97048000  | C            | -3.17800800 | -1.63971800 | 0.41465700  |
| C | -2.17376500 | -1.31126800 | 1.51744800  | C            | -4.62733700 | -1.74702700 | -0.03457500 |
| F | -1.19090000 | -1.78628300 | 2.29977500  | H            | -5.32721900 | -1.39766500 | 0.72845200  |
| C | -0.46984800 | 1.61618700  | -0.25993200 | H            | -4.83149800 | -2.80777100 | -0.19905200 |
| C | -0.14293000 | 2.34221800  | -1.39875500 | C            | -3.95145200 | 0.39655200  | 2.58000100  |
| F | 0.31794900  | 1.72785500  | -2.50632800 | H            | -4.68950500 | 1.10317100  | 2.96460200  |
| C | -0.24385000 | 3.72628300  | -1.49046000 | H            | -3.04394600 | 0.49577600  | 3.18253400  |
| F | 0.09080500  | 4.35367500  | -2.61712700 | C            | -3.65214600 | 0.72333100  | 1.12690700  |
| C | -0.69872200 | 4.45152900  | -0.40155500 | C            | -2.82481500 | 0.20221600  | -1.89013000 |
| F | -0.80621300 | 5.77422300  | -0.47051600 | C            | -3.78944200 | 1.19098400  | -2.10804300 |
| C | -1.03466800 | 3.77847000  | 0.76477000  | H            | -3.82582200 | 2.05768200  | -1.45204200 |
| F | -1.47010700 | 4.45921300  | 1.82193400  | C            | -4.69420400 | 1.08630200  | -3.15996800 |
| C | -0.91204800 | 2.39668900  | 0.81059200  | H            | -5.43729900 | 1.86183200  | -3.31412100 |
| F | -1.24719100 | 1.80834500  | 1.96929000  | C            | -4.63353400 | -0.00694200 | -4.02029500 |
| H | 4.89452700  | -1.29574600 | 0.10178600  | H            | -5.33596500 | -0.09192900 | -4.84290300 |
| H | 3.63901700  | 1.29039000  | -3.60046500 | C            | -3.65192900 | -0.97751400 | -3.83564900 |
| H | 2.60745600  | -1.96329500 | -1.85683900 | H            | -3.58334700 | -1.81744400 | -4.51920600 |
| H | 2.49954900  | -2.17502100 | -0.12986300 | C            | -2.74953500 | -0.87164600 | -2.78094300 |
| H | 2.56283100  | 1.76517100  | -1.43946500 | H            | -1.97549600 | -1.62333100 | -2.65830500 |
| H | 4.10903800  | 0.94567300  | -1.20429000 | C            | 2.05081900  | -0.76316900 | -0.21220700 |
| H | 0.91898300  | -0.40570200 | -1.15166800 | C            | 3.24877200  | -0.40299000 | 0.40945900  |
| C | 0.04764500  | -5.21016000 | -1.97514900 | F            | 3.23946200  | 0.54964700  | 1.35861400  |
| C | 0.26983400  | -4.41421200 | -3.09562000 | C            | 4.48737400  | -0.95001400 | 0.11648900  |
| C | 0.20701300  | -3.02971800 | -2.98762200 | F            | 5.58629200  | -0.54018000 | 0.75193400  |

|               |             |             |             |   |             |             |             |
|---------------|-------------|-------------|-------------|---|-------------|-------------|-------------|
| C             | 4.57918500  | -1.93767800 | -0.85498900 | H | -2.05549000 | -1.00230200 | 0.32330800  |
| F             | 5.75532200  | -2.48692000 | -1.15377400 | C | -0.77053900 | 0.31881300  | 1.35034500  |
| C             | 3.42569500  | -2.34932900 | -1.49713100 | C | -2.98175800 | 2.15524600  | -0.38604700 |
| F             | 3.48413500  | -3.31133400 | -2.42135700 | H | -2.42948600 | 2.72171500  | 0.36158300  |
| C             | 2.20731300  | -1.75950300 | -1.16957300 | H | -4.00950000 | 2.02318700  | -0.01912200 |
| F             | 1.14691400  | -2.27077100 | -1.83625400 | C | -3.02623800 | 2.91791800  | -1.70698800 |
| C             | 0.78373400  | 1.59852900  | 0.33222500  | H | -2.00616500 | 3.08937600  | -2.06729200 |
| C             | -0.08120800 | 2.39891300  | 1.07193500  | H | -3.46395600 | 3.90327300  | -1.51916500 |
| F             | -1.11272200 | 1.83841300  | 1.77096600  | C | -3.83706200 | 2.14788300  | -2.74544900 |
| C             | -0.03974100 | 3.78479200  | 1.13945000  | H | -4.88457700 | 2.09655200  | -2.42044500 |
| F             | -0.92966400 | 4.45829200  | 1.87394100  | H | -3.82404200 | 2.66088300  | -3.71152400 |
| C             | 0.92601300  | 4.46149800  | 0.41378400  | C | -3.27830500 | 0.73331400  | -2.87510000 |
| F             | 0.99542300  | 5.79058600  | 0.45077600  | H | -3.90447000 | 0.11954300  | -3.52999700 |
| C             | 1.80406200  | 3.72756800  | -0.36936700 | H | -2.28125400 | 0.76448800  | -3.32839500 |
| F             | 2.72347700  | 4.36186300  | -1.09572300 | C | -3.19122100 | 0.05182900  | -1.51394600 |
| C             | 1.70949400  | 2.34042800  | -0.40389400 | H | -4.19975400 | -0.05591200 | -1.08319500 |
| F             | 2.57952800  | 1.73528500  | -1.22341200 | H | -2.76967600 | -0.94860700 | -1.61713800 |
| H             | -4.82530700 | -1.22066300 | -0.97020900 | C | -3.37935900 | -0.05601300 | 1.61996400  |
| H             | -4.34646000 | -0.61434800 | 2.71043700  | C | -3.98182500 | -1.31051700 | 1.77789900  |
| H             | -3.03607700 | -2.12477900 | 1.38204800  | H | -3.56957000 | -2.16330600 | 1.24331300  |
| H             | -2.51608300 | -2.13997800 | -0.29088100 | C | -5.08395600 | -1.49616200 | 2.60646400  |
| H             | -3.21828700 | 1.71947300  | 1.04906200  | H | -5.52197900 | -2.48392400 | 2.70800400  |
| H             | -4.53711400 | 0.67856700  | 0.49174100  | C | -5.61885000 | -0.41675700 | 3.30074800  |
| H             | -1.88501000 | -0.28748900 | 1.25980700  | H | -6.47795000 | -0.55227300 | 3.94974900  |
| C             | -1.77189100 | -4.27641100 | 2.59927400  | C | -5.04072600 | 0.84043500  | 3.15466500  |
| C             | -1.89742800 | -3.18921400 | 3.46002000  | H | -5.44971300 | 1.69237000  | 3.68858500  |
| C             | -1.17963000 | -2.01933500 | 3.21264600  | C | -3.93598200 | 1.01988700  | 2.32684700  |
| C             | -0.31891100 | -1.89765200 | 2.11075400  | H | -3.52006500 | 2.01537000  | 2.23480200  |
| C             | -0.19933400 | -3.00989800 | 1.26313600  | C | 2.00798900  | 0.12010000  | 0.52400100  |
| C             | -0.91423200 | -4.18025700 | 1.50383400  | C | 2.93108100  | -0.28048500 | -0.45421300 |
| H             | -2.32463200 | -5.19172300 | 2.78503400  | F | 2.51742200  | -0.68032200 | -1.67251500 |
| H             | -2.54760200 | -3.25039100 | 4.32804400  | C | 4.30859900  | -0.30855800 | -0.28955500 |
| H             | -1.26548100 | -1.18209600 | 3.90271400  | F | 5.09803600  | -0.69698600 | -1.28816900 |
| H             | 0.45541300  | -2.95388500 | 0.39850600  | C | 4.85686100  | 0.04972900  | 0.93050300  |
| H             | -0.79896700 | -5.02486100 | 0.83093800  | F | 6.17089100  | 0.02334800  | 1.11919800  |
| C             | 0.43384400  | -0.60930100 | 1.87512500  | C | 4.00121900  | 0.43446500  | 1.94684300  |
| H             | -0.01009000 | 0.14622700  | 2.53091200  | F | 4.49255800  | 0.77919300  | 3.13534200  |
| H             | 1.44432600  | -0.74026200 | 2.28054800  | C | 2.62720100  | 0.45271800  | 1.73036300  |
|               |             |             |             | F | 1.92346900  | 0.84518000  | 2.80384400  |
| <b>N16_TS</b> |             |             |             | C | 0.20809700  | -1.50325700 | -0.46144400 |
| N             | -2.36024100 | 0.81717500  | -0.54891900 | C | -0.30998600 | -1.85056000 | -1.70554100 |
| H             | -0.91572500 | 0.97458700  | -0.85730400 | F | -0.72434500 | -0.90519900 | -2.57247900 |
| B             | 0.38812000  | -0.00263700 | 0.19967100  | C | -0.43946800 | -3.15525600 | -2.16687900 |
| C             | -2.16209000 | 0.01900700  | 0.70103200  | F | -0.97347000 | -3.39615700 | -3.36339900 |

|              |             |             |             |   |             |             |             |
|--------------|-------------|-------------|-------------|---|-------------|-------------|-------------|
| C            | -0.00241300 | -4.20536000 | -1.37677700 | H | 5.45182200  | -0.71398500 | -2.50347600 |
| F            | -0.11950500 | -5.46121700 | -1.79458200 | C | 3.91163000  | 0.67016900  | -1.87025300 |
| C            | 0.56309000  | -3.92100800 | -0.14360600 | H | 4.37791200  | 1.58402600  | -2.24980500 |
| F            | 1.01028200  | -4.91092400 | 0.62530800  | H | 3.20477700  | 0.32654100  | -2.63277800 |
| C            | 0.66586900  | -2.60042000 | 0.27555200  | C | 3.14192300  | 1.03616300  | -0.61033700 |
| F            | 1.26601800  | -2.42122500 | 1.46139700  | H | 3.80900800  | 1.42004100  | 0.16871300  |
| C            | -0.66822800 | -0.66466900 | 2.53628000  | H | 2.38022500  | 1.78852800  | -0.81432700 |
| H            | -1.37677200 | -0.37204200 | 3.31888200  | C | 2.46391200  | 0.60670000  | 2.41027700  |
| H            | -0.91957400 | -1.68869800 | 2.24125900  | C | 2.73961700  | 1.94035700  | 2.72924400  |
| H            | 0.32951600  | -0.67289700 | 2.97055600  | H | 2.33075100  | 2.72987100  | 2.10283900  |
| C            | -0.71170500 | 1.74352200  | 1.92783300  | C | 3.50706300  | 2.27690000  | 3.84115800  |
| H            | 0.18982400  | 1.88681100  | 2.51732600  | H | 3.70014400  | 3.32031200  | 4.06729000  |
| H            | -0.71376700 | 2.51849500  | 1.16089900  | C | 4.01532500  | 1.27532600  | 4.66050800  |
| H            | -1.55091400 | 1.91586700  | 2.60754500  | H | 4.61139800  | 1.52981300  | 5.53056600  |
| C            | 1.62247600  | 5.42058600  | -1.05721900 | C | 3.74822600  | -0.05831700 | 4.36017100  |
| C            | 0.97189300  | 4.94777900  | -2.19204900 | H | 4.13544500  | -0.84696400 | 4.99698800  |
| C            | 0.53635800  | 3.62767600  | -2.24467000 | C | 2.97886900  | -0.39069600 | 3.24988500  |
| C            | 0.72395100  | 2.74346100  | -1.17257900 | H | 2.78057200  | -1.43529600 | 3.04153100  |
| C            | 1.39112800  | 3.23649400  | -0.04578900 | C | -2.39572700 | -0.68262100 | 0.38574000  |
| C            | 1.83173900  | 4.55587700  | 0.01211300  | C | -3.30711400 | -0.35703100 | -0.62791000 |
| H            | 1.96591300  | 6.44870800  | -1.00794500 | F | -2.88063000 | 0.18706800  | -1.78524500 |
| H            | 0.80637200  | 5.60295800  | -3.04159700 | C | -4.67827300 | -0.56101900 | -0.56668100 |
| H            | 0.04934100  | 3.26552300  | -3.14792500 | F | -5.46325000 | -0.20698900 | -1.58524500 |
| H            | 1.56365600  | 2.59315700  | 0.80664100  | C | -5.23102200 | -1.15020800 | 0.55914600  |
| H            | 2.34234400  | 4.90592400  | 0.90384700  | F | -6.54298000 | -1.36083500 | 0.64454200  |
| C            | 0.25790600  | 1.31218300  | -1.34598100 | C | -4.38389000 | -1.52319000 | 1.58555500  |
| H            | -0.36139200 | 1.28808700  | -2.25390600 | F | -4.87959500 | -2.10796900 | 2.67776800  |
| H            | 1.07325700  | 0.68542400  | -1.69850000 | C | -3.01371800 | -1.29888900 | 1.47324400  |
| <b>N16_P</b> |             |             |             | F | -2.31277800 | -1.73964000 | 2.53878000  |
| N            | 2.44535300  | -0.15022500 | 0.01096900  | C | -0.68024000 | 1.07994300  | -0.61436800 |
| H            | 1.79005300  | -0.53704800 | -0.68747400 | C | 0.10193400  | 1.40533600  | -1.71083600 |
| B            | -0.75767100 | -0.44327700 | 0.07085200  | F | 0.88704900  | 0.45397500  | -2.28016900 |
| C            | 1.57831900  | 0.33324300  | 1.20355600  | C | 0.21567000  | 2.66603500  | -2.28369900 |
| H            | 1.26095200  | 1.31509800  | 0.84652300  | F | 1.04958900  | 2.87223500  | -3.30696900 |
| C            | 0.23467100  | -0.42731500 | 1.44745500  | C | -0.52476800 | 3.70940100  | -1.75529100 |
| C            | 3.47390500  | -1.21120400 | 0.30208000  | F | -0.43934400 | 4.93387800  | -2.26896700 |
| H            | 2.95823200  | -2.06938200 | 0.72773200  | C | -1.34621600 | 3.45308400  | -0.66615200 |
| H            | 4.14618500  | -0.78587800 | 1.04995400  | F | -2.06834900 | 4.44207200  | -0.14242900 |
| C            | 4.23269400  | -1.60801700 | -0.95558000 | C | -1.40771700 | 2.17188400  | -0.12890700 |
| H            | 3.53394400  | -2.04053200 | -1.67566600 | F | -2.24178500 | 2.03585400  | 0.91176700  |
| H            | 4.93599900  | -2.39920100 | -0.67914800 | C | -0.40212200 | 0.45395500  | 2.55482400  |
| C            | 4.94515000  | -0.41443500 | -1.58257200 | H | 0.13885400  | 0.34489000  | 3.50132700  |
| H            | 5.71161900  | -0.02777000 | -0.89845800 | H | -0.37818100 | 1.51533600  | 2.28658100  |
|              |             |             |             | H | -1.44055500 | 0.19327200  | 2.73436900  |

|               |             |             |             |   |             |             |             |
|---------------|-------------|-------------|-------------|---|-------------|-------------|-------------|
| C             | 0.44502200  | -1.85445200 | 1.99449000  | H | -3.27487400 | 0.14375900  | -2.53528800 |
| H             | -0.42974000 | -2.47657900 | 1.80959400  | C | -3.27429100 | 1.51562500  | -0.87104200 |
| H             | 1.28655300  | -2.36182700 | 1.52090100  | C | -2.09286400 | 2.24847300  | -1.53282400 |
| H             | 0.61515900  | -1.85881200 | 3.07666200  | H | -1.36434000 | 1.56765900  | -1.97017900 |
| C             | 2.62586700  | -4.09209200 | -2.82118500 | H | -1.56744800 | 2.93285700  | -0.86280700 |
| C             | 2.06910800  | -3.02210100 | -3.51718000 | H | -2.50139100 | 2.85219400  | -2.34777200 |
| C             | 1.10615700  | -2.21227100 | -2.91719900 | C | -4.18786600 | 2.61253500  | -0.29468500 |
| C             | 0.65736300  | -2.44140600 | -1.60435300 | H | -3.70962500 | 3.15180700  | 0.52599700  |
| C             | 1.23500900  | -3.52977100 | -0.92651900 | H | -5.15345200 | 2.24709000  | 0.04833100  |
| C             | 2.20368000  | -4.33842500 | -1.51667400 | H | -4.38078500 | 3.34183900  | -1.08681400 |
| H             | 3.36453900  | -4.73257300 | -3.29198200 | C | -4.87715500 | 0.09039900  | 1.63602600  |
| H             | 2.36570600  | -2.82715400 | -4.54349900 | H | -4.41527700 | 0.58672200  | 2.49220700  |
| H             | 0.64912800  | -1.41769700 | -3.49656900 | H | -5.46041400 | -0.74447700 | 2.03527900  |
| H             | 0.86096100  | -3.78943600 | 0.05949600  | H | -5.57934700 | 0.77834500  | 1.16777900  |
| H             | 2.60409400  | -5.18416900 | -0.96533800 | C | -3.18201600 | -1.68791300 | 1.41247600  |
| C             | -0.55452200 | -1.72583400 | -1.03244900 | H | -2.24960200 | -2.00339600 | 0.95210100  |
| H             | -1.16659200 | -1.42702300 | -1.89131300 | H | -3.87631200 | -2.53221600 | 1.35790800  |
| H             | -1.12414000 | -2.53048700 | -0.55190100 | H | -2.99325900 | -1.48047400 | 2.46407300  |
| <b>N19_TS</b> |             |             |             | C | 1.98171900  | -0.82649900 | 0.09282100  |
| B             | 0.49180300  | -0.11431300 | 0.23401800  | C | 2.47744500  | -1.73974900 | -0.83577700 |
| C             | -0.15334400 | -0.33504200 | 1.70691900  | F | 1.70433400  | -2.24337100 | -1.81073300 |
| C             | 0.45956000  | -1.21166500 | 2.61307900  | C | 3.79397900  | -2.19420600 | -0.84798800 |
| H             | 1.30631200  | -1.80724600 | 2.28267100  | F | 4.18713400  | -3.07840800 | -1.76286600 |
| C             | 0.05484300  | -1.34146200 | 3.93933500  | C | 4.69719400  | -1.71602700 | 0.08472500  |
| H             | 0.57088200  | -2.03495800 | 4.59576800  | F | 5.95644300  | -2.14187000 | 0.08739000  |
| C             | -0.98067800 | -0.55332100 | 4.42149300  | C | 4.26835500  | -0.77795000 | 1.01335200  |
| H             | -1.28394300 | -0.60677400 | 5.46214400  | F | 5.12288100  | -0.29091100 | 1.91144100  |
| C             | -1.63916300 | 0.29577000  | 3.53939000  | C | 2.95011900  | -0.35014500 | 0.98555500  |
| H             | -2.47537600 | 0.89409900  | 3.89471900  | F | 2.61674200  | 0.58001100  | 1.89133600  |
| C             | -1.27317300 | 0.37390500  | 2.19605800  | C | 0.79107600  | 1.43143300  | -0.23906300 |
| C             | -2.12186900 | 1.24508600  | 1.30379400  | C | 0.85508800  | 2.52888700  | 0.62193800  |
| H             | -1.50142000 | 2.01504300  | 0.85047000  | F | 0.54777300  | 2.41822600  | 1.91822500  |
| H             | -2.86792600 | 1.76489900  | 1.91065700  | C | 1.20682600  | 3.81215300  | 0.21210900  |
| N             | -2.78265700 | 0.51100100  | 0.18347100  | F | 1.22323200  | 4.81636400  | 1.08637100  |
| C             | -3.83572800 | -0.50369200 | 0.67259400  | C | 1.55884200  | 4.04263000  | -1.10783500 |
| C             | -4.55611500 | -1.12024600 | -0.53910900 | F | 1.89924400  | 5.26099000  | -1.51347600 |
| H             | -3.84662300 | -1.76512800 | -1.07024500 | C | 1.56081900  | 2.97803600  | -1.99682400 |
| H             | -5.33794200 | -1.77704300 | -0.14410000 | F | 1.91642200  | 3.16759100  | -3.26596800 |
| C             | -5.13665000 | -0.11057600 | -1.51121700 | C | 1.20710100  | 1.71674100  | -1.54127900 |
| H             | -5.92133300 | 0.49094100  | -1.03785900 | F | 1.26842200  | 0.73535900  | -2.46118700 |
| H             | -5.60628100 | -0.62565400 | -2.35469300 | H | -1.64234200 | -0.19476100 | -0.36543000 |
| C             | -4.00219300 | 0.77034900  | -2.00110400 | C | -1.64550100 | -5.09991500 | -1.26505800 |
| H             | -4.35642000 | 1.52099100  | -2.71553300 | C | -2.17478300 | -4.22141800 | -2.20441000 |
|               |             |             |             | C | -1.86804900 | -2.86428200 | -2.14068600 |

|              |             |             |             |   |             |             |             |
|--------------|-------------|-------------|-------------|---|-------------|-------------|-------------|
| C            | -1.04310300 | -2.35113100 | -1.13543700 | H | -2.67229300 | 2.03862500  | 2.86773200  |
| C            | -0.50646300 | -3.25065700 | -0.20678900 | H | -4.34597700 | 1.45954500  | 2.76893000  |
| C            | -0.80495900 | -4.60716300 | -0.26992600 | H | -3.93129800 | 3.08222600  | 2.22530100  |
| H            | -1.87923300 | -6.15846600 | -1.31112400 | C | -4.40370200 | -1.24574200 | 2.29254000  |
| H            | -2.82082600 | -4.59025000 | -2.99506900 | H | -3.57373400 | -1.50638300 | 2.94609000  |
| H            | -2.27164400 | -2.18815500 | -2.89229400 | H | -5.07059100 | -2.11187400 | 2.26657400  |
| H            | 0.14050800  | -2.88169000 | 0.58296600  | H | -4.96200800 | -0.41850900 | 2.73194300  |
| H            | -0.37835400 | -5.28343300 | 0.46422800  | C | -3.42608000 | -2.28078200 | 0.21826700  |
| C            | -0.73208200 | -0.87791500 | -1.09987400 | H | -2.83698300 | -2.06931200 | -0.67662900 |
| H            | 0.28957100  | -0.77522600 | -1.48058500 | H | -4.29078900 | -2.87389900 | -0.09457800 |
| H            | -1.20506700 | -0.38647100 | -1.96109800 | H | -2.82304300 | -2.88242900 | 0.89366400  |
| <b>N19_P</b> |             |             |             | C | 2.46534100  | -0.80839400 | -0.30830900 |
| B            | 0.83015200  | -0.54640500 | -0.56330700 | C | 3.39212200  | -0.31893900 | -1.23125700 |
| C            | 0.00423000  | -1.58660100 | 0.42754100  | F | 2.97472300  | 0.36498000  | -2.31266400 |
| C            | 0.38045800  | -2.93268300 | 0.23871100  | C | 4.76907000  | -0.44768400 | -1.10998300 |
| H            | 1.02850900  | -3.16898600 | -0.60246000 | F | 5.58575500  | 0.03811600  | -2.04778100 |
| C            | 0.06504800  | -3.95614300 | 1.11947100  | C | 5.29432000  | -1.07623800 | 0.00801700  |
| H            | 0.41380200  | -4.96625700 | 0.92638000  | F | 6.61176700  | -1.21534200 | 0.15157500  |
| C            | -0.62719500 | -3.66225100 | 2.29250500  | C | 4.42607200  | -1.54268700 | 0.98057900  |
| H            | -0.80448800 | -4.42262100 | 3.04579000  | F | 4.91561200  | -2.12621300 | 2.07750600  |
| C            | -1.10342100 | -2.37353900 | 2.46353200  | C | 3.05165500  | -1.38894900 | 0.81881400  |
| H            | -1.67142900 | -2.13397900 | 3.35977200  | F | 2.31857400  | -1.83490400 | 1.84840000  |
| C            | -0.88077300 | -1.37091800 | 1.50526700  | C | 0.78528800  | 1.08474400  | -0.21859600 |
| C            | -1.64676400 | -0.08968800 | 1.70581900  | C | 1.12801500  | 1.51173800  | 1.07006100  |
| H            | -1.02371800 | 0.78133800  | 1.53812500  | F | 1.25962200  | 0.60503000  | 2.05351300  |
| H            | -2.04838100 | -0.03716500 | 2.71731200  | C | 1.32679800  | 2.83256000  | 1.44612900  |
| N            | -2.85184900 | 0.11453600  | 0.76537900  | F | 1.63645100  | 3.15118900  | 2.70361400  |
| C            | -3.96291200 | -0.98912900 | 0.85331700  | C | 1.21886700  | 3.83159300  | 0.48647200  |
| C            | -5.17476200 | -0.56928500 | 0.00306900  | F | 1.40516200  | 5.10738400  | 0.81620600  |
| H            | -4.89972700 | -0.65742100 | -1.05486900 | C | 0.90787000  | 3.47318000  | -0.81346200 |
| H            | -5.94688400 | -1.32216500 | 0.19002700  | F | 0.79156000  | 4.41462300  | -1.75111100 |
| C            | -5.69197800 | 0.83171600  | 0.26677800  | C | 0.71482200  | 2.13054400  | -1.13511400 |
| H            | -6.03732600 | 0.95087500  | 1.30035400  | F | 0.39365300  | 1.92209400  | -2.42475800 |
| H            | -6.55262700 | 1.03875300  | -0.37534900 | H | -2.47333800 | -0.00780900 | -0.18969100 |
| C            | -4.56405700 | 1.79375400  | -0.04950200 | C | -3.62106800 | -1.67979400 | -3.32819800 |
| H            | -4.87378800 | 2.83670900  | 0.06825200  | C | -2.72897500 | -2.73779000 | -3.16625100 |
| H            | -4.27289300 | 1.66592100  | -1.10088000 | C | -1.42137300 | -2.49872900 | -2.75275100 |
| C            | -3.31727800 | 1.60340300  | 0.82374600  | C | -0.95251600 | -1.20091600 | -2.49762800 |
| C            | -2.22388000 | 2.48576100  | 0.21745400  | C | -1.86994100 | -0.14746600 | -2.65465400 |
| H            | -1.92939000 | 2.12689100  | -0.77202100 | C | -3.18181100 | -0.38293200 | -3.07024200 |
| H            | -1.33290000 | 2.57510800  | 0.83903900  | H | -4.63635800 | -1.86051900 | -3.66737700 |
| H            | -2.63920900 | 3.48964600  | 0.09477100  | H | -3.05043100 | -3.75490400 | -3.37061300 |
| C            | -3.58064600 | 2.04749400  | 2.26337600  | H | -0.73205900 | -3.33156600 | -2.64267300 |
|              |             |             |             | H | -1.51496000 | 0.87249900  | -2.54138400 |



|               |             |             |             |   |             |             |             |
|---------------|-------------|-------------|-------------|---|-------------|-------------|-------------|
| H             | -3.85389900 | 0.45692900  | -3.23305600 | C | -2.04269400 | 1.55332600  | 2.87883700  |
| C             | 0.48482000  | -0.95263800 | -2.14006000 | H | -1.39891700 | 2.29930100  | 2.41461300  |
| H             | 1.03869900  | -1.87437400 | -2.35612400 | H | -1.43718200 | 0.70243600  | 3.19936000  |
| H             | 0.88179600  | -0.20669900 | -2.82670100 | H | -2.46772100 | 2.01256600  | 3.77595000  |
| <b>N20_TS</b> |             |             |             | C | -3.98485600 | 0.04121200  | 2.74163700  |
| B             | 0.91011300  | 0.20404300  | -0.40990800 | H | -3.38271700 | -0.86994700 | 2.81516600  |
| C             | -0.19245900 | 0.29339500  | -1.60929400 | H | -4.93873000 | -0.21184700 | 2.27717300  |
| C             | 0.15294900  | -0.25540600 | -2.85326500 | H | -4.18119800 | 0.39587400  | 3.75689800  |
| H             | 1.13166700  | -0.71276300 | -2.96465500 | C | 1.98622900  | -1.00908300 | -0.48956400 |
| C             | -0.70049800 | -0.23791700 | -3.95088100 | C | 3.34494200  | -0.90535800 | -0.18675600 |
| H             | -0.38299600 | -0.68182100 | -4.88951100 | F | 3.90251900  | 0.26903800  | 0.13113500  |
| C             | -1.95403200 | 0.35115500  | -3.83917300 | C | 4.21808500  | -1.98852900 | -0.17569400 |
| H             | -2.63505600 | 0.37648400  | -4.68361400 | F | 5.50547000  | -1.81145200 | 0.11521400  |
| C             | -2.32435700 | 0.91482500  | -2.62497500 | C | 3.74797100  | -3.25911400 | -0.46336900 |
| H             | -3.30693600 | 1.37172700  | -2.52576500 | F | 4.56896500  | -4.30458300 | -0.45015000 |
| C             | -1.47456000 | 0.89511300  | -1.51218200 | C | 2.40260200  | -3.42481400 | -0.75301700 |
| C             | -2.04906900 | 1.53082500  | -0.25152000 | F | 1.91249100  | -4.63921300 | -1.00295200 |
| H             | -2.78379000 | 2.28280700  | -0.55420700 | C | 1.57451700  | -2.31391200 | -0.76024200 |
| H             | -1.28571600 | 2.05633500  | 0.32700600  | F | 0.26817500  | -2.57312300 | -0.98802200 |
| N             | -2.73372000 | 0.53275700  | 0.65989400  | C | 1.60634300  | 1.68478200  | -0.28558500 |
| C             | -3.20936400 | 1.12898000  | 1.98603600  | C | 1.42362800  | 2.69102500  | 0.64821000  |
| C             | -4.08147500 | 2.35863400  | 1.71189700  | F | 0.60207000  | 2.50698900  | 1.71136500  |
| H             | -4.57432300 | 2.62804600  | 2.65117200  | C | 2.02096200  | 3.94612600  | 0.58637800  |
| H             | -3.43020100 | 3.20197900  | 1.46077800  | F | 1.77962700  | 4.85453600  | 1.53172900  |
| C             | -5.12056700 | 2.13750900  | 0.60066000  | C | 2.86172500  | 4.24281800  | -0.47057400 |
| C             | -5.06010800 | 0.78183800  | -0.06951200 | F | 3.44779800  | 5.43299000  | -0.55572600 |
| C             | -6.20704300 | 0.32408400  | -0.71465700 | C | 3.08433100  | 3.27544000  | -1.44307400 |
| C             | -6.21302600 | -0.90553400 | -1.35277000 | F | 3.89625500  | 3.54015900  | -2.46420200 |
| H             | -7.10713500 | -1.26096900 | -1.85454200 | C | 2.45866000  | 2.04515700  | -1.33373500 |
| C             | -5.06185900 | -1.68011300 | -1.34427200 | F | 2.73663200  | 1.15101300  | -2.29230000 |
| H             | -5.06714300 | -2.63616700 | -1.85417100 | H | -7.09808800 | 0.94619100  | -0.70754800 |
| C             | -3.88963600 | -1.26254500 | -0.70658200 | H | -6.13276600 | 2.27106500  | 0.99244200  |
| C             | -3.90526700 | -0.01800500 | -0.05415600 | H | -5.00145200 | 2.90912100  | -0.17013600 |
| C             | -2.66772700 | -2.16107200 | -0.74686500 | H | -1.54460900 | -0.17290400 | 1.04488800  |
| H             | -1.80164500 | -1.51200700 | -0.86778100 | C | 1.83775800  | -2.18987600 | 4.39896000  |
| C             | -2.63842200 | -3.10225200 | -1.95426600 | C | 1.72684800  | -0.80448400 | 4.32621600  |
| H             | -1.65029900 | -3.56191200 | -2.02238700 | C | 1.07253700  | -0.20338100 | 3.25484600  |
| H             | -2.82528600 | -2.55620100 | -2.88321400 | C | 0.50743400  | -0.97962400 | 2.23519500  |
| H             | -3.37331600 | -3.90902200 | -1.86376100 | C | 0.63218800  | -2.37303600 | 2.31654700  |
| C             | -2.53210400 | -2.96393900 | 0.55155600  | C | 1.28915500  | -2.97169800 | 3.38567700  |
| H             | -1.68925200 | -3.65773300 | 0.47694300  | H | 2.35142900  | -2.65631800 | 5.23302800  |
| H             | -3.44037600 | -3.54904600 | 0.73008500  | H | 2.15881700  | -0.18275900 | 5.10431900  |
| H             | -2.36775300 | -2.32126700 | 1.42300200  | H | 1.00815800  | 0.87849500  | 3.20105100  |
|               |             |             |             | H | 0.21540500  | -2.98846000 | 1.52367000  |

|              |             |             |             |   |             |             |             |
|--------------|-------------|-------------|-------------|---|-------------|-------------|-------------|
| H            | 1.37517700  | -4.05322900 | 3.42448100  | C | -2.30984800 | 1.40166000  | 3.00424300  |
| C            | -0.17393700 | -0.36813900 | 1.07144300  | H | -1.68343500 | 2.15017100  | 2.51901900  |
| H            | -0.23427900 | 0.71166700  | 1.03418000  | H | -1.67708400 | 0.58057400  | 3.35162200  |
| H            | -0.49114900 | -1.04693600 | 0.29183900  | H | -2.75943900 | 1.87003400  | 3.88430300  |
| <b>N20_P</b> |             |             |             | C | -4.20727200 | -0.19193600 | 2.88574100  |
| B            | 0.81554700  | 0.15159800  | -0.21482900 | H | -3.56539100 | -1.06252600 | 3.05257300  |
| C            | -0.32813100 | 0.07573700  | -1.41469300 | H | -5.11759300 | -0.51880900 | 2.38257600  |
| C            | 0.00578400  | -0.51107000 | -2.64890400 | H | -4.47934200 | 0.20632500  | 3.86631600  |
| H            | 0.99478200  | -0.94165200 | -2.76612100 | C | 2.02347200  | -0.94147000 | -0.47940200 |
| C            | -0.85907100 | -0.55106900 | -3.73621500 | C | 3.38992200  | -0.70219100 | -0.36377200 |
| H            | -0.53731000 | -1.01921100 | -4.66208800 | F | 3.86018600  | 0.53557500  | -0.15531900 |
| C            | -2.12525800 | 0.01991900  | -3.64502100 | C | 4.35909900  | -1.69873800 | -0.42316800 |
| H            | -2.80654500 | 0.01010900  | -4.48940400 | F | 5.65208200  | -1.39250300 | -0.30880000 |
| C            | -2.49358600 | 0.61671500  | -2.44909600 | C | 3.97914700  | -3.02035100 | -0.59067900 |
| H            | -3.47864300 | 1.07161900  | -2.35718200 | F | 4.89257300  | -3.98895400 | -0.64852700 |
| C            | -1.62352300 | 0.64077400  | -1.34956900 | C | 2.62938600  | -3.32029600 | -0.68849800 |
| C            | -2.16593600 | 1.29460600  | -0.10367200 | F | 2.23067500  | -4.58913000 | -0.82204000 |
| H            | -2.90383800 | 2.05469500  | -0.36567100 | C | 1.70553400  | -2.28887800 | -0.62230400 |
| H            | -1.38777000 | 1.74019300  | 0.51164900  | F | 0.40580600  | -2.67548200 | -0.64469000 |
| N            | -2.92639700 | 0.29761600  | 0.80152100  | C | 1.34733300  | 1.72073200  | -0.32254000 |
| C            | -3.45553500 | 0.90555200  | 2.12594200  | C | 1.04163700  | 2.78376400  | 0.51545800  |
| C            | -4.37289800 | 2.07136500  | 1.74936000  | F | 0.29966600  | 2.60341000  | 1.64321500  |
| H            | -4.92488500 | 2.33735400  | 2.65508500  | C | 1.42974600  | 4.10349300  | 0.30272500  |
| H            | -3.75650500 | 2.94111300  | 1.50496700  | F | 1.08429200  | 5.05918500  | 1.17020800  |
| C            | -5.35347500 | 1.76795100  | 0.59458400  | C | 2.16566200  | 4.41871100  | -0.82447200 |
| C            | -5.21696100 | 0.39360000  | -0.02274700 | F | 2.54692800  | 5.67333400  | -1.05816200 |
| C            | -6.29789600 | -0.16999100 | -0.69763700 | C | 2.49538700  | 3.40249800  | -1.71181700 |
| C            | -6.18900900 | -1.43124300 | -1.26651700 | F | 3.19654500  | 3.68756800  | -2.80942000 |
| H            | -7.03381200 | -1.86627700 | -1.79017000 | C | 2.07983700  | 2.10706700  | -1.44962100 |
| C            | -4.99868300 | -2.13995600 | -1.16443400 | F | 2.43426900  | 1.18765000  | -2.35802800 |
| H            | -4.92266800 | -3.11886600 | -1.62311000 | H | -7.22707500 | 0.38842900  | -0.76620100 |
| C            | -3.88460600 | -1.61871600 | -0.50109500 | H | -6.38590000 | 1.88170000  | 0.93521200  |
| C            | -4.03744000 | -0.34618200 | 0.06476100  | H | -5.22033900 | 2.51616600  | -0.19590900 |
| C            | -2.59106300 | -2.41464000 | -0.42374700 | H | -2.23186700 | -0.41800700 | 1.05526400  |
| H            | -1.75442600 | -1.71356300 | -0.47238500 | C | 3.32493900  | -1.36717400 | 4.09875900  |
| C            | -2.40230700 | -3.35143500 | -1.61949500 | C | 3.02396300  | -0.02900200 | 3.86075200  |
| H            | -1.38412800 | -3.74275500 | -1.60579600 | C | 2.01062200  | 0.31931600  | 2.97206500  |
| H            | -2.54767100 | -2.81382900 | -2.56041200 | C | 1.27337400  | -0.66292900 | 2.30127200  |
| H            | -3.08995400 | -4.20297900 | -1.58284900 | C | 1.57944900  | -2.00389200 | 2.56165800  |
| C            | -2.48903600 | -3.19913600 | 0.89088200  | C | 2.59479200  | -2.35609800 | 3.44486000  |
| H            | -1.53956100 | -3.74092900 | 0.91864600  | H | 4.12088800  | -1.63679700 | 4.78544300  |
| H            | -3.30872600 | -3.91975500 | 0.97672200  | H | 3.58482100  | 0.75174100  | 4.36579000  |
| H            | -2.52473100 | -2.55021000 | 1.77391200  | H | 1.78619700  | 1.36576900  | 2.79335800  |
|              |             |             |             | H | 1.01807200  | -2.78118000 | 2.04628200  |

|               |             |             |             |              |             |             |             |
|---------------|-------------|-------------|-------------|--------------|-------------|-------------|-------------|
| H             | 2.81649500  | -3.40444700 | 3.62126700  | C            | 1.19814000  | 1.47811700  | -0.61136400 |
| C             | 0.22619600  | -0.30066700 | 1.27900700  | C            | 0.96282400  | 2.23941400  | -1.75761900 |
| H             | -0.40174700 | 0.47861700  | 1.70489300  | F            | 0.69652000  | 1.66418100  | -2.93840000 |
| H             | -0.39349000 | -1.19839200 | 1.12222400  | C            | 0.97544200  | 3.63219500  | -1.78098700 |
| <b>N21_TS</b> |             |             |             | F            | 0.70656200  | 4.28645500  | -2.91002300 |
| B             | 1.09936800  | -0.13725100 | -0.53800600 | C            | 1.28532200  | 4.33615100  | -0.62987100 |
| C             | 0.49057000  | -0.92076400 | -1.81821800 | F            | 1.30068400  | 5.66412000  | -0.63125500 |
| C             | 1.30246900  | -1.88148400 | -2.44255200 | C            | 1.60291700  | 3.62822200  | 0.52129700  |
| H             | 2.29508600  | -2.07335000 | -2.05128600 | F            | 1.93667800  | 4.27558900  | 1.63625400  |
| C             | 0.90827000  | -2.59874200 | -3.56978500 | C            | 1.58683000  | 2.24388200  | 0.49198900  |
| H             | 1.58645300  | -3.32386400 | -4.00828600 | F            | 2.00688400  | 1.64546000  | 1.61745000  |
| C             | -0.34777300 | -2.38776500 | -4.11708700 | C            | 2.40595800  | -0.89596000 | 0.05810500  |
| H             | -0.67893600 | -2.94724500 | -4.98598500 | C            | 3.66401700  | -0.31400300 | 0.19832900  |
| C             | -1.17911700 | -1.43852000 | -3.53215500 | F            | 3.88655700  | 0.95278800  | -0.17227700 |
| H             | -2.16720300 | -1.25948500 | -3.94815700 | C            | 4.77106500  | -0.98804000 | 0.70609300  |
| C             | -0.76950200 | -0.70491200 | -2.42071500 | F            | 5.94550900  | -0.36998500 | 0.81326600  |
| C             | -1.71468800 | 0.35139000  | -1.92352500 | C            | 4.64945400  | -2.31187900 | 1.09194400  |
| H             | -2.65935800 | 0.29109000  | -2.47250800 | F            | 5.69483000  | -2.97262600 | 1.57733600  |
| H             | -1.29496800 | 1.34326200  | -2.09671800 | C            | 3.42199100  | -2.94685600 | 0.95474700  |
| N             | -2.01106100 | 0.25240400  | -0.46448700 | F            | 3.29392000  | -4.22666400 | 1.30101400  |
| C             | -2.55611100 | 1.55063200  | 0.02777600  | C            | 2.34610200  | -2.23955300 | 0.44259500  |
| C             | -3.97632700 | 1.77438800  | -0.46035700 | F            | 1.20491500  | -2.93685700 | 0.30272300  |
| H             | -4.03670100 | 1.73369400  | -1.55484700 | H            | -0.88708000 | -0.01409200 | 0.19404800  |
| H             | -4.30613600 | 2.77492200  | -0.16436000 | H            | -1.85803000 | 2.32824400  | -0.29653400 |
| C             | -4.89566100 | 0.72261700  | 0.16296600  | H            | -2.55648200 | 1.52877900  | 1.11684300  |
| H             | -4.99462800 | 0.97209200  | 1.23053600  | C            | -2.90479700 | 1.32620900  | 4.04455800  |
| C             | -4.26658800 | -0.66153600 | 0.09336100  | C            | -1.72975000 | 2.00115700  | 3.71874000  |
| C             | -5.02386200 | -1.79770000 | 0.39921900  | C            | -0.79108800 | 1.41770200  | 2.87353400  |
| H             | -6.06695000 | -1.67602400 | 0.67431100  | C            | -1.00502900 | 0.14419800  | 2.32208400  |
| C             | -4.48111600 | -3.07467100 | 0.37494000  | C            | -2.16151800 | -0.54656300 | 2.71187500  |
| H             | -5.10263100 | -3.92914500 | 0.62836600  | C            | -3.10477400 | 0.03905600  | 3.55205300  |
| C             | -3.14270300 | -3.27211200 | 0.02821900  | H            | -3.64004900 | 1.78618900  | 4.69698900  |
| C             | -2.37063300 | -2.15129000 | -0.25973600 | H            | -1.54138200 | 2.99033700  | 4.12505600  |
| H             | -1.31877200 | -2.28045900 | -0.49172400 | H            | 0.11869200  | 1.95846800  | 2.64121400  |
| C             | -2.91543400 | -0.86641600 | -0.21066100 | H            | -2.33247200 | -1.55298600 | 2.34093500  |
| C             | -6.28204700 | 0.78027800  | -0.48252500 | H            | -3.99682500 | -0.51871300 | 3.82237400  |
| H             | -6.66031500 | 1.80653600  | -0.46034800 | C            | -0.04588000 | -0.46219400 | 1.32585900  |
| H             | -7.01071600 | 0.15080400  | 0.03180800  | H            | 0.94703500  | -0.22709600 | 1.68966700  |
| H             | -6.23095200 | 0.45616100  | -1.52662600 | H            | -0.15686300 | -1.54560500 | 1.32798800  |
| C             | -2.53750700 | -4.64981200 | -0.03514300 | <b>N21_P</b> |             |             |             |
| H             | -2.98003800 | -5.31150200 | 0.71343500  | B            | 0.62349400  | -0.45962900 | -0.23412400 |
| H             | -1.45818800 | -4.61091200 | 0.13065200  | C            | -0.29742400 | -1.16001200 | -1.43067400 |
| H             | -2.70532800 | -5.10183700 | -1.01809200 | C            | 0.15463600  | -2.43592600 | -1.82698500 |

|   |             |             |             |               |             |             |             |
|---|-------------|-------------|-------------|---------------|-------------|-------------|-------------|
| H | 1.09758400  | -2.79183100 | -1.41592900 | C             | 0.22419900  | 1.77780500  | 1.29535600  |
| C | -0.52560200 | -3.26098600 | -2.70816600 | F             | 0.08045600  | 1.04998100  | 2.41292900  |
| H | -0.10869400 | -4.22733100 | -2.97488600 | C             | 2.22929700  | -0.39752500 | -0.63276900 |
| C | -1.74355800 | -2.84739700 | -3.24687800 | C             | 2.80291800  | -0.62372400 | -1.88404600 |
| H | -2.29346100 | -3.47825700 | -3.93716700 | F             | 2.05994600  | -0.94438100 | -2.95280900 |
| C | -2.24480400 | -1.61569900 | -2.86561700 | C             | 4.16887300  | -0.52207000 | -2.13741000 |
| H | -3.20870300 | -1.28574700 | -3.24625600 | F             | 4.64909300  | -0.77866000 | -3.35645000 |
| C | -1.54120100 | -0.78616000 | -1.97729200 | C             | 5.03038700  | -0.12972100 | -1.12790000 |
| C | -2.25371000 | 0.47185700  | -1.57081700 | F             | 6.33815600  | -0.02210100 | -1.35707200 |
| H | -3.21191600 | 0.56348800  | -2.08408300 | C             | 4.50648900  | 0.17353400  | 0.12016900  |
| H | -1.66725200 | 1.37413500  | -1.73875200 | F             | 5.31259200  | 0.59713000  | 1.09444700  |
| N | -2.58079900 | 0.45594000  | -0.07510000 | C             | 3.13997200  | 0.05723100  | 0.32753500  |
| C | -2.89359600 | 1.82898300  | 0.44540100  | F             | 2.70235200  | 0.45334400  | 1.53225000  |
| C | -4.25499100 | 2.26913800  | -0.05188300 | H             | -1.70606000 | 0.15210000  | 0.37749600  |
| H | -4.25809300 | 2.29429900  | -1.14788400 | H             | -2.09181700 | 2.48329200  | 0.10068500  |
| H | -4.43118300 | 3.29646100  | 0.27833800  | H             | -2.85741400 | 1.76689900  | 1.53733800  |
| C | -5.37301700 | 1.35720500  | 0.45919600  | C             | 3.34991700  | -2.54166200 | 3.96445600  |
| H | -5.57592500 | 1.63336400  | 1.50347400  | C             | 3.44242800  | -2.94839900 | 2.63579800  |
| C | -4.94761100 | -0.10351300 | 0.47256900  | C             | 2.45322600  | -2.59158700 | 1.72566800  |
| C | -5.87553000 | -1.10601300 | 0.76977600  | C             | 1.35662300  | -1.80990000 | 2.11072700  |
| H | -6.90576000 | -0.82654300 | 0.96568900  | C             | 1.26772700  | -1.43036500 | 3.45268600  |
| C | -5.51637300 | -2.44612800 | 0.83048800  | C             | 2.25263400  | -1.78766700 | 4.36906000  |
| H | -6.27192400 | -3.19248000 | 1.05771900  | H             | 4.12105600  | -2.81585400 | 4.67712000  |
| C | -4.19858400 | -2.84862000 | 0.61035900  | H             | 4.28631500  | -3.54750900 | 2.30703000  |
| C | -3.25385500 | -1.86376900 | 0.33150600  | H             | 2.53385500  | -2.91538600 | 0.69010400  |
| H | -2.21933000 | -2.14312300 | 0.15592200  | H             | 0.41829700  | -0.83993600 | 3.78165400  |
| C | -3.63297400 | -0.52753300 | 0.26215600  | H             | 2.16183100  | -1.47334100 | 5.40459500  |
| C | -6.64831900 | 1.59264800  | -0.35534600 | C             | 0.29955300  | -1.45625600 | 1.09281000  |
| H | -6.89193800 | 2.65873700  | -0.36891500 | H             | -0.01529300 | -2.41502100 | 0.66289500  |
| H | -7.50797100 | 1.06237200  | 0.05760400  | H             | -0.58443200 | -1.09085200 | 1.63958500  |
| H | -6.50730300 | 1.25903300  | -1.38787100 |               |             |             |             |
| C | -3.77856000 | -4.29275900 | 0.66925500  | Methylbenzene |             |             |             |
| H | -3.22127900 | -4.56592800 | -0.23100700 | N4_TS         |             |             |             |
| H | -4.64281800 | -4.95369100 | 0.75652100  | C             | 1.23779700  | 1.26976500  | 1.24431200  |
| H | -3.12388400 | -4.47158200 | 1.52727600  | C             | 0.66103000  | 1.43219800  | -0.01633500 |
| C | 0.34716300  | 1.16432500  | 0.05152500  | C             | 0.63496900  | 2.73125700  | -0.53881400 |
| C | 0.46244500  | 2.06412600  | -1.01104100 | C             | 1.15998000  | 3.80549400  | 0.17359800  |
| F | 0.58864400  | 1.58973400  | -2.26009000 | C             | 1.73827700  | 3.60446300  | 1.42642600  |
| C | 0.42360500  | 3.44567500  | -0.88030800 | C             | 1.78204700  | 2.32527600  | 1.97023600  |
| F | 0.51836900  | 4.24169800  | -1.94457800 | H             | 0.19934200  | 2.89443000  | -1.52033100 |
| C | 0.29494200  | 4.00044500  | 0.38884000  | H             | 1.12730900  | 4.80413300  | -0.25093000 |
| F | 0.26121700  | 5.32092800  | 0.54428700  | H             | 2.15459400  | 4.44178200  | 1.97725600  |
| C | 0.19479000  | 3.15852800  | 1.48435800  | H             | 2.23121100  | 2.15597600  | 2.94519000  |
| F | 0.05572500  | 3.67323300  | 2.70626800  | H             | 0.91917800  | -0.69901200 | 0.40425800  |

|      |             |             |             |       |             |             |             |
|------|-------------|-------------|-------------|-------|-------------|-------------|-------------|
| B    | 0.09499700  | 0.16922700  | -0.83608100 | H     | 0.63773000  | -1.20673400 | -2.64462500 |
| N    | 1.22217400  | -0.09372500 | 1.73519500  | H     | 0.02946300  | -3.52748500 | -3.19338300 |
| C    | -1.45743900 | -0.19046300 | -0.53767500 | H     | -1.62800000 | -4.75242100 | -1.79079300 |
| C    | -2.41155500 | 0.65536100  | -1.10265500 | H     | -2.64432700 | -3.61096600 | 0.15475700  |
| C    | -1.98276800 | -1.23334100 | 0.21436800  | H     | -1.84956100 | -0.14884200 | 0.93399500  |
| C    | -3.77997100 | 0.48563400  | -0.95025600 | B     | -0.04806500 | 0.49685400  | -0.70137200 |
| C    | -3.34534000 | -1.44274400 | 0.39962800  | N     | -2.15227600 | -1.12748400 | 1.00015100  |
| C    | -4.25179100 | -0.57599300 | -0.18958900 | C     | 1.53463900  | 0.41853500  | -0.28204700 |
| C    | 2.51360300  | -0.56496600 | 2.25235000  | C     | 2.43324100  | 1.38965100  | -0.71901900 |
| H    | 2.47207200  | -1.65207500 | 2.36778400  | C     | 2.09434700  | -0.54663600 | 0.54523600  |
| H    | 3.30126500  | -0.31341300 | 1.54060200  | C     | 3.78323100  | 1.39623400  | -0.38917400 |
| H    | 2.74067100  | -0.11971800 | 3.22982100  | C     | 3.43650500  | -0.58806600 | 0.90204300  |
| C    | 0.14542000  | -0.31145600 | 2.71298500  | C     | 4.29087200  | 0.39466200  | 0.42622900  |
| H    | 0.05503300  | -1.37927700 | 2.92342000  | C     | -3.64243200 | -1.10896100 | 0.98319800  |
| H    | 0.35736100  | 0.23005000  | 3.64416300  | H     | -3.99109700 | -0.53619800 | 1.84235400  |
| H    | -0.79473600 | 0.05352300  | 2.29649100  | H     | -3.96273500 | -0.62189100 | 0.06169300  |
| F    | -2.01277500 | 1.69724600  | -1.84506200 | H     | -4.00973300 | -2.13319300 | 1.03200000  |
| F    | -4.64152700 | 1.32461700  | -1.52235700 | C     | -1.60468600 | -1.66978500 | 2.27593800  |
| F    | -5.55942700 | -0.75614300 | -0.02601700 | H     | -2.00104800 | -1.07944700 | 3.10420400  |
| F    | -3.78061900 | -2.46402800 | 1.13765500  | H     | -1.91413900 | -2.71107200 | 2.37076200  |
| F    | -1.16846800 | -2.11694500 | 0.82867500  | H     | -0.51908200 | -1.60235100 | 2.22934100  |
| H    | 0.27316900  | 0.32059000  | -2.01391100 | F     | 2.00792900  | 2.39802000  | -1.49285400 |
| C    | 5.37054200  | -1.11941300 | -1.44112900 | F     | 4.59548900  | 2.35392800  | -0.84165600 |
| C    | 4.52558300  | -0.06590700 | -1.77657400 | F     | 5.58286500  | 0.38149400  | 0.75469100  |
| C    | 3.15591500  | -0.15287100 | -1.53776600 | F     | 3.90551000  | -1.55241200 | 1.69911800  |
| C    | 2.60667600  | -1.30074900 | -0.95759000 | F     | 1.32178200  | -1.52868500 | 1.06717100  |
| C    | 3.46779700  | -2.35345200 | -0.62755300 | H     | -0.09444600 | 0.99451900  | -1.80793900 |
| C    | 4.83524800  | -2.26897600 | -0.86609200 | C     | -5.03674900 | 2.21762900  | -0.06457400 |
| H    | 6.43751500  | -1.04505300 | -1.62494100 | C     | -4.26199500 | 1.88993700  | -1.17661500 |
| H    | 4.93285700  | 0.83591200  | -2.22276100 | C     | -2.89072000 | 1.68116300  | -1.04665700 |
| H    | 2.51521600  | 0.68338000  | -1.79432200 | C     | -2.25474500 | 1.81064300  | 0.19714900  |
| H    | 3.05524900  | -3.25227000 | -0.17479400 | C     | -3.05042300 | 2.14414100  | 1.30313000  |
| H    | 5.48146900  | -3.09977100 | -0.60056500 | C     | -4.42367100 | 2.34701800  | 1.17874600  |
| C    | 1.13510500  | -1.43176500 | -0.64736800 | H     | -6.10539500 | 2.37616700  | -0.16849700 |
| H    | 0.55113800  | -1.72742300 | -1.52059500 | H     | -4.72923100 | 1.78997100  | -2.15186700 |
| H    | 0.97847600  | -2.26865900 | 0.04511100  | H     | -2.29304200 | 1.41227900  | -1.91219200 |
|      |             |             |             | H     | -2.57562100 | 2.25669200  | 2.27653000  |
|      |             |             |             | H     | -5.01266000 | 2.61184300  | 2.05206300  |
| N4_P |             |             |             | C     | -0.77023200 | 1.54954700  | 0.35259100  |
| C    | -1.54821600 | -1.77256600 | -0.19617800 | H     | -0.24017300 | 2.49475400  | 0.17489500  |
| C    | -0.62473700 | -1.03120000 | -0.92673800 | H     | -0.56153600 | 1.32845700  | 1.41491500  |
| C    | -0.08460300 | -1.73209600 | -2.02493100 |       |             |             |             |
| C    | -0.42588900 | -3.03867200 | -2.33768700 |       |             |             |             |
| C    | -1.35407700 | -3.72959600 | -1.55615700 | N5_TS |             |             |             |
| C    | -1.92487300 | -3.08775800 | -0.46958800 | B     | 0.50028100  | -0.29694100 | 0.23225300  |

|   |             |             |             |      |             |             |             |
|---|-------------|-------------|-------------|------|-------------|-------------|-------------|
| C | -0.19488200 | -1.07404600 | 1.47037900  | F    | 2.12327000  | 5.21207500  | 1.05464200  |
| C | 0.66330700  | -1.41849000 | 2.53093700  | C    | 2.07053000  | 3.27498500  | -0.28732200 |
| H | 1.70834800  | -1.13441700 | 2.47691200  | F    | 2.76188100  | 3.89264300  | -1.24200200 |
| C | 0.22433700  | -2.07665700 | 3.66858500  | C    | 1.66545800  | 1.95874400  | -0.43918700 |
| H | 0.92497400  | -2.31149100 | 4.46342600  | F    | 2.00281600  | 1.37594000  | -1.60275500 |
| C | -1.11582800 | -2.43202500 | 3.78110200  | C    | 1.83805800  | -1.13345400 | -0.27660700 |
| H | -1.48076900 | -2.95324000 | 4.66019100  | C    | 3.07289300  | -0.90177300 | 0.33804000  |
| C | -1.99116100 | -2.11200400 | 2.75472000  | F    | 3.19054500  | -0.00415100 | 1.33294800  |
| H | -3.03057100 | -2.39382300 | 2.84471700  | C    | 4.24902300  | -1.56252700 | 0.00994000  |
| C | -1.54333400 | -1.43434300 | 1.61210600  | F    | 5.38202200  | -1.28109300 | 0.64977200  |
| N | -2.45757100 | -1.10804000 | 0.52118600  | C    | 4.24113300  | -2.51612600 | -0.99558700 |
| C | -3.02005500 | -2.33577600 | -0.19122900 | F    | 5.35595400  | -3.15782000 | -1.32829000 |
| C | -3.71790000 | -1.83118900 | -1.46318800 | C    | 3.04823300  | -2.78760700 | -1.64282400 |
| H | -2.97274500 | -1.37751600 | -2.12501900 | F    | 3.00745400  | -3.69608700 | -2.61542100 |
| H | -4.12793500 | -2.69746900 | -1.99350400 | C    | 1.89504300  | -2.10363700 | -1.27470600 |
| C | -4.80565600 | -0.80369400 | -1.17137000 | F    | 0.80175100  | -2.43679700 | -1.98593600 |
| H | -5.61372300 | -1.26192900 | -0.58780400 | H    | -1.43122600 | -0.51597800 | -0.36256000 |
| H | -5.25490700 | -0.46196900 | -2.10908600 | C    | -2.63508900 | 3.19080600  | -3.40541300 |
| C | -4.20535500 | 0.38909600  | -0.43345000 | C    | -1.98485200 | 3.43628200  | -2.20108800 |
| H | -4.98893500 | 1.10219300  | -0.15390400 | C    | -1.32740800 | 2.41207500  | -1.52294300 |
| H | -3.52665300 | 0.91971400  | -1.10522000 | C    | -1.30905700 | 1.10653600  | -2.03038200 |
| C | -3.45628600 | 0.00516900  | 0.85395600  | C    | -1.94311600 | 0.88702400  | -3.26192600 |
| C | -4.49673400 | -0.29142100 | 1.95183300  | C    | -2.60437500 | 1.90631500  | -3.93887200 |
| H | -5.29353200 | -0.96617800 | 1.64214300  | H    | -3.15020800 | 3.99164800  | -3.92545600 |
| H | -4.97204700 | 0.66372100  | 2.19541600  | H    | -1.98601700 | 4.43532100  | -1.77628700 |
| H | -4.04188700 | -0.65918200 | 2.87127000  | H    | -0.84355500 | 2.64875300  | -0.58391700 |
| C | -2.64460700 | 1.19775800  | 1.35969400  | H    | -1.91510600 | -0.10785800 | -3.69989200 |
| H | -1.78069000 | 1.38826700  | 0.72535600  | H    | -3.09017900 | 1.69485600  | -4.88629300 |
| H | -2.28979900 | 1.03470400  | 2.37890300  | C    | -0.64382100 | -0.09553600 | -1.37615300 |
| H | -3.27599600 | 2.09107300  | 1.34558300  | H    | 0.41185100  | -0.00089900 | -1.65009600 |
| C | -4.00256200 | -3.20731500 | 0.61624300  | H    | -0.90268100 | -0.98008400 | -1.96028200 |
| H | -3.48952200 | -3.76657100 | 1.39961700  | N5_P |             |             |             |
| H | -4.42417800 | -3.94355100 | -0.07505000 | B    | 0.65186400  | -0.16222500 | -0.06561200 |
| H | -4.83390300 | -2.66603400 | 1.05899700  | C    | -0.14849300 | -0.84036500 | 1.25093400  |
| C | -1.86713900 | -3.26800800 | -0.57142200 | C    | 0.73209700  | -1.11365200 | 2.32422400  |
| H | -1.10656500 | -2.78402100 | -1.17671100 | H    | 1.78385800  | -0.88866400 | 2.17696900  |
| H | -2.27658200 | -4.10104200 | -1.15040900 | C    | 0.34681400  | -1.61148000 | 3.55559400  |
| H | -1.38272900 | -3.68210300 | 0.31623900  | H    | 1.09007000  | -1.78268500 | 4.32755700  |
| C | 0.92404000  | 1.24948100  | 0.50970100  | C    | -0.99798200 | -1.87558500 | 3.79670500  |
| C | 0.65247900  | 1.96313300  | 1.67613100  | H    | -1.33578000 | -2.26098400 | 4.75262200  |
| F | -0.00408400 | 1.40916100  | 2.70194400  | C    | -1.91156300 | -1.63043200 | 2.78762300  |
| C | 1.03504500  | 3.28781300  | 1.86867200  | H    | -2.95740700 | -1.82713300 | 2.97102600  |
| F | 0.73746200  | 3.91503100  | 3.00514500  | C    | -1.48984300 | -1.13291500 | 1.54673100  |
| C | 1.74754600  | 3.94974100  | 0.88208400  | N    | -2.56949600 | -0.89795300 | 0.53729700  |

|   |             |             |             |        |             |             |             |
|---|-------------|-------------|-------------|--------|-------------|-------------|-------------|
| C | -3.24885000 | -2.20196200 | -0.00809800 | F      | 5.34448800  | -3.59945300 | -0.82871100 |
| C | -4.20753300 | -1.79804400 | -1.13945300 | C      | 3.00516300  | -3.28641400 | -0.77427100 |
| H | -3.61465600 | -1.48318100 | -2.00263100 | F      | 2.80383700  | -4.56411200 | -1.10459400 |
| H | -4.74515500 | -2.70364800 | -1.43800700 | C      | 1.93494800  | -2.43078200 | -0.55892100 |
| C | -5.17163500 | -0.67298100 | -0.79077000 | F      | 0.71693900  | -2.99870300 | -0.68584800 |
| H | -5.86885100 | -0.97767500 | -0.00136900 | H      | -2.05823600 | -0.54949800 | -0.28960900 |
| H | -5.77795700 | -0.43291000 | -1.66904600 | C      | -3.14281600 | 1.98740900  | -3.58574000 |
| C | -4.37004300 | 0.55347200  | -0.37386300 | C      | -2.29817000 | 2.63492200  | -2.68665600 |
| H | -5.02836300 | 1.39876600  | -0.14961700 | C      | -1.29495300 | 1.93316200  | -2.02211400 |
| H | -3.72537300 | 0.86808200  | -1.20328800 | C      | -1.10514700 | 0.55617000  | -2.22458300 |
| C | -3.50727200 | 0.31436900  | 0.86992500  | C      | -1.95534800 | -0.06646500 | -3.15184100 |
| C | -4.38802800 | 0.13450200  | 2.10750700  | C      | -2.96173700 | 0.62771200  | -3.82092700 |
| H | -5.09750200 | -0.68894200 | 2.04828300  | H      | -3.92021000 | 2.53782100  | -4.10558700 |
| H | -4.97274200 | 1.05519300  | 2.19242600  | H      | -2.41265600 | 3.69940000  | -2.50527700 |
| H | -3.79985700 | 0.04677200  | 3.02012700  | H      | -0.64234100 | 2.47004600  | -1.34194800 |
| C | -2.60091000 | 1.51377500  | 1.12328300  | H      | -1.79815400 | -1.12035300 | -3.37470400 |
| H | -1.83484800 | 1.61491800  | 0.35248700  | H      | -3.59347300 | 0.10614900  | -4.53434200 |
| H | -2.11074300 | 1.44678700  | 2.09324800  | C      | 0.03203100  | -0.24478400 | -1.62084300 |
| H | -3.21754300 | 2.41684400  | 1.09980000  | H      | 0.90147700  | 0.01439700  | -2.23404200 |
| C | -3.98179700 | -3.03510600 | 1.04577900  | H      | -0.14783800 | -1.29595600 | -1.86289900 |
| H | -3.29300200 | -3.48206200 | 1.76166400  |        |             |             |             |
| H | -4.46075500 | -3.85550900 | 0.50472900  | N11_TS |             |             |             |
| H | -4.76675600 | -2.50401200 | 1.58199100  | B      | 0.22142500  | -0.02444500 | 0.30827400  |
| C | -2.13306500 | -3.06304100 | -0.58777200 | N      | -2.22279400 | -1.63742100 | 0.40147700  |
| H | -1.59277800 | -2.53760600 | -1.37708500 | C      | -1.26834400 | -1.90267600 | 1.49467400  |
| H | -2.58464200 | -3.95738500 | -1.02591300 | H      | -0.65955400 | -2.74321300 | 1.13892600  |
| H | -1.41433200 | -3.36900800 | 0.17316900  | C      | -0.31482400 | -0.71517700 | 1.71288000  |
| C | 1.04181900  | 1.41747000  | 0.28952300  | H      | -0.93825300 | 0.06823500  | 2.16935500  |
| C | 0.68157700  | 2.14406400  | 1.42245100  | C      | 0.48565800  | -1.26832200 | 2.90507600  |
| F | 0.02524300  | 1.58080900  | 2.45492900  | H      | 1.18403600  | -2.04481800 | 2.58103500  |
| C | 0.95399500  | 3.49949900  | 1.60694600  | H      | 1.06241000  | -0.49881300 | 3.41802400  |
| F | 0.54318400  | 4.12093400  | 2.71482100  | C      | -0.59680600 | -1.89292800 | 3.81858100  |
| C | 1.65957800  | 4.19553300  | 0.64466000  | H      | -0.21408800 | -2.76426300 | 4.35488200  |
| F | 1.93410700  | 5.48860400  | 0.80062600  | H      | -0.91763300 | -1.17028800 | 4.57371300  |
| C | 2.09285200  | 3.51381200  | -0.48526100 | C      | -1.78900100 | -2.25784800 | 2.89409900  |
| F | 2.80695500  | 4.15499000  | -1.41086900 | H      | -2.66318800 | -1.65282100 | 3.15016800  |
| C | 1.78819500  | 2.17005800  | -0.62605400 | H      | -2.08275800 | -3.30787100 | 2.97417700  |
| F | 2.29163100  | 1.58476300  | -1.72508700 | C      | -2.76613000 | -2.88998400 | -0.16495600 |
| C | 2.04459200  | -1.08246800 | -0.21778300 | H      | -3.36427900 | -3.40178800 | 0.60665500  |
| C | 3.36469400  | -0.66101900 | -0.06214500 | H      | -1.91879100 | -3.53482400 | -0.41583900 |
| F | 3.66440400  | 0.58067000  | 0.35102800  | C      | -3.63009900 | -2.62296200 | -1.39233700 |
| C | 4.47283800  | -1.47892800 | -0.26803800 | H      | -4.01084400 | -3.57628100 | -1.77130100 |
| F | 5.70583000  | -1.00028700 | -0.09682500 | H      | -3.01037300 | -2.18456600 | -2.18547900 |
| C | 4.29634900  | -2.80202300 | -0.63324800 | C      | -4.77072700 | -1.66583700 | -1.05428200 |

|   |             |             |             |       |             |             |             |
|---|-------------|-------------|-------------|-------|-------------|-------------|-------------|
| H | -5.36404400 | -1.44040000 | -1.94484600 | H     | 0.50064000  | -0.53242300 | -1.78684400 |
| H | -5.44296900 | -2.14375300 | -0.32909200 |       |             |             |             |
| C | -4.19493800 | -0.38517700 | -0.45248900 | N11_P |             |             |             |
| H | -3.61017300 | 0.13944100  | -1.21286900 | B     | 0.24605400  | -0.20552000 | 0.04054700  |
| H | -4.99259300 | 0.29108600  | -0.12970900 | N     | -2.47088200 | -1.85439200 | 0.19374400  |
| C | -3.31672600 | -0.70798000 | 0.75343900  | C     | -1.23796000 | -2.24436600 | 0.99030200  |
| H | -2.87808900 | 0.20001300  | 1.17592300  | H     | -0.69445600 | -2.88125600 | 0.28906600  |
| H | -3.94465300 | -1.17303100 | 1.52849500  | C     | -0.28772800 | -1.09604400 | 1.36648600  |
| C | -0.69880300 | 1.30691600  | 0.04807800  | H     | -0.84743400 | -0.41078100 | 2.02461300  |
| F | 0.20125600  | 2.10744300  | 2.07994900  | C     | 0.60870000  | -1.89485500 | 2.33484700  |
| C | -0.63000900 | 2.28576500  | 1.04043500  | H     | 1.24166400  | -2.59323700 | 1.77898000  |
| F | -1.27486000 | 4.33910800  | 2.02258400  | H     | 1.26719700  | -1.24834100 | 2.91504500  |
| C | -1.38177600 | 3.45216400  | 1.03540700  | C     | -0.38630200 | -2.66517800 | 3.21696300  |
| F | -2.99643500 | 4.79155300  | -0.04316100 | H     | 0.05882200  | -3.53254800 | 3.70920400  |
| C | -2.25317300 | 3.68925100  | -0.01889400 | H     | -0.77038500 | -2.00471400 | 4.00049100  |
| F | -3.16693500 | 2.96786800  | -2.06795100 | C     | -1.53780500 | -3.06221000 | 2.26274700  |
| C | -2.33449500 | 2.76395900  | -1.04742400 | H     | -2.51130800 | -2.82444000 | 2.70073900  |
| F | -1.66489400 | 0.79814700  | -2.06513400 | H     | -1.53964000 | -4.13435900 | 2.04650400  |
| C | -1.54460700 | 1.62079200  | -1.00653900 | C     | -3.11269200 | -3.06575600 | -0.41754100 |
| C | 1.77657200  | 0.42213900  | 0.01134100  | H     | -3.46073100 | -3.68399200 | 0.41623000  |
| F | 1.08782000  | 1.48787200  | -2.00516200 | H     | -2.32170200 | -3.60389000 | -0.94587500 |
| C | 2.05535400  | 1.21486600  | -1.11148000 | C     | -4.25803500 | -2.68058300 | -1.34224900 |
| F | 3.47170900  | 2.47374000  | -2.51909700 | H     | -4.68249900 | -3.59727300 | -1.76067700 |
| C | 3.30125600  | 1.73735600  | -1.42344800 | H     | -3.86169400 | -2.09364400 | -2.18028000 |
| F | 5.57583400  | 1.97933900  | -0.85398400 | C     | -5.30860900 | -1.86625400 | -0.58899700 |
| C | 4.37309400  | 1.48825400  | -0.57982500 | H     | -6.11562700 | -1.56766000 | -1.26228700 |
| F | 5.18149400  | 0.42862500  | 1.35804200  | H     | -5.75546000 | -2.48199700 | 0.20220500  |
| C | 4.16730400  | 0.70120700  | 0.53896700  | C     | -4.64288900 | -0.63300900 | 0.01716000  |
| F | 2.83449100  | -0.58004500 | 1.89567200  | H     | -4.29472500 | 0.01705800  | -0.79103600 |
| C | 2.89858300  | 0.19682100  | 0.80664500  | H     | -5.34986900 | -0.04759200 | 0.61179100  |
| H | -1.10552400 | -1.15933600 | -0.44015000 | C     | -3.47967400 | -1.01629800 | 0.92767700  |
| C | 1.85028200  | -5.13863900 | -1.06037700 | H     | -2.95019500 | -0.14276400 | 1.31128500  |
| C | 0.86078400  | -4.87976200 | -2.00400400 | H     | -3.83580500 | -1.61738600 | 1.76718000  |
| C | 0.25134400  | -3.62922400 | -2.04903000 | C     | -0.95922000 | 0.95072600  | -0.09576400 |
| C | 0.60823300  | -2.60981300 | -1.15765500 | F     | -0.18652000 | 1.93801900  | 1.91325300  |
| C | 1.60585300  | -2.88683700 | -0.21632300 | C     | -1.05576500 | 1.93682400  | 0.89226900  |
| C | 2.21890100  | -4.13578800 | -0.16869400 | F     | -2.02157300 | 3.86091400  | 1.87375200  |
| H | 2.32792500  | -6.11207300 | -1.01874200 | C     | -1.99971000 | 2.95290000  | 0.90001700  |
| H | 0.56146500  | -5.65009500 | -2.70791800 | F     | -3.87575700 | 3.96616600  | -0.12183100 |
| H | -0.51954000 | -3.43582300 | -2.79256800 | C     | -2.94201600 | 3.01822800  | -0.12081700 |
| H | 1.90271000  | -2.13057400 | 0.50043500  | F     | -3.85011600 | 2.03383400  | -2.06300600 |
| H | 2.98772800  | -4.32256700 | 0.57457300  | C     | -2.90513000 | 2.06067300  | -1.11739800 |
| C | -0.08953200 | -1.27386500 | -1.25398400 | F     | -2.06904600 | 0.10438100  | -2.03207600 |
| H | -0.92183100 | -1.37784700 | -1.96578900 | C     | -1.93228500 | 1.06649400  | -1.07398400 |



|        |             |             |             |   |             |             |             |
|--------|-------------|-------------|-------------|---|-------------|-------------|-------------|
| C      | 1.67972700  | 0.62352800  | 0.18350900  | C | 0.40346300  | -4.50037800 | -0.40928200 |
| F      | 0.88959100  | 2.51035500  | -1.06341000 | H | -0.22366800 | -3.95508400 | -1.12257000 |
| C      | 1.88285400  | 1.87307900  | -0.41265500 | H | -0.18607900 | -5.35339000 | -0.05916100 |
| F      | 3.18811300  | 3.74840600  | -1.02069800 | C | 0.72072900  | -3.61074100 | 0.78945700  |
| C      | 3.09578800  | 2.55207600  | -0.43590900 | H | -0.19973700 | -3.25966500 | 1.26290000  |
| F      | 5.38983000  | 2.60384100  | 0.12558400  | H | 1.27919300  | -4.20145500 | 1.53107100  |
| C      | 4.21526300  | 1.97601700  | 0.14107100  | C | 2.17051400  | -2.11535100 | 2.83510100  |
| F      | 5.15829600  | 0.11764900  | 1.23418100  | H | 1.35487500  | -2.75651800 | 3.19181500  |
| C      | 4.08877500  | 0.72204300  | 0.71259200  | H | 3.05233000  | -2.75405900 | 2.70251100  |
| F      | 2.88037700  | -1.16158100 | 1.20459900  | C | 2.43319400  | -1.04637000 | 3.89670900  |
| C      | 2.85382400  | 0.08444000  | 0.70968800  | H | 2.71178100  | -1.52197100 | 4.84241900  |
| H      | -2.11833600 | -1.27954900 | -0.58503700 | H | 3.28571800  | -0.42551100 | 3.58997400  |
| C      | 4.02211700  | -3.46891700 | -1.46847100 | C | 1.20064200  | -0.16003400 | 4.07399000  |
| C      | 2.82125100  | -4.04269600 | -1.06481300 | H | 1.39261500  | 0.61438700  | 4.82379800  |
| C      | 1.65104100  | -3.28816800 | -1.06536700 | H | 0.36573600  | -0.76748800 | 4.44903200  |
| C      | 1.64365500  | -1.94354900 | -1.45207400 | C | 0.80305200  | 0.48196200  | 2.74496500  |
| C      | 2.85571000  | -1.39904800 | -1.89730700 | H | 1.62168000  | 1.14026500  | 2.42231900  |
| C      | 4.02998700  | -2.14405600 | -1.89664300 | H | -0.07522000 | 1.11896900  | 2.87733400  |
| H      | 4.93816000  | -4.05039900 | -1.46303300 | C | 1.28423600  | 1.16178700  | -0.27945800 |
| H      | 2.79200900  | -5.08233300 | -0.75214300 | C | 1.31864700  | 2.47805700  | 0.18460900  |
| H      | 0.72002300  | -3.76955700 | -0.77171700 | F | 0.37722900  | 2.91817400  | 1.03247800  |
| H      | 2.87556800  | -0.36501000 | -2.23393000 | C | 2.29217900  | 3.40051700  | -0.17219100 |
| H      | 4.95541100  | -1.68709900 | -2.23435800 | F | 2.26585300  | 4.63825700  | 0.31724300  |
| C      | 0.40304300  | -1.08991200 | -1.37417000 | C | 3.30334500  | 3.02370800  | -1.04473900 |
| H      | -0.46231600 | -1.73683100 | -1.59335500 | F | 4.24763100  | 3.88986200  | -1.39746600 |
| H      | 0.42498300  | -0.36669900 | -2.19872200 | C | 3.31758100  | 1.72911600  | -1.53674300 |
|        |             |             |             | F | 4.28007100  | 1.34110500  | -2.37282300 |
| N12_TS |             |             |             | C | 2.32087900  | 0.84214300  | -1.14699400 |
| N      | 1.52827300  | -2.43251100 | 0.39603100  | F | 2.41543000  | -0.39767900 | -1.67459000 |
| H      | 0.63190500  | -1.54232700 | -0.40100100 | C | -1.35014900 | 0.87710200  | 0.23089300  |
| B      | 0.11047800  | 0.14972800  | 0.24515100  | C | -1.71889700 | 1.71832300  | -0.82204000 |
| C      | 1.76619800  | -1.46815500 | 1.50616000  | F | -0.87623000 | 1.91905400  | -1.85189900 |
| H      | 2.60393200  | -0.84006900 | 1.16610200  | C | -2.93357100 | 2.38147200  | -0.90951000 |
| C      | 0.53351100  | -0.56637100 | 1.64669400  | F | -3.20901500 | 3.16307500  | -1.95144700 |
| H      | -0.28342300 | -1.19915600 | 2.01557900  | C | -3.86306600 | 2.22857200  | 0.10818500  |
| C      | 2.79457900  | -2.88666600 | -0.21967100 | F | -5.03501000 | 2.85155500  | 0.05130400  |
| H      | 3.36379700  | -3.46705800 | 0.52478200  | C | -3.55381000 | 1.40894800  | 1.18059100  |
| H      | 3.38058700  | -2.00543300 | -0.48010400 | F | -4.43595400 | 1.24105400  | 2.16469800  |
| C      | 2.54799300  | -3.75499200 | -1.44859900 | C | -2.32309200 | 0.76460200  | 1.22323900  |
| H      | 2.05251800  | -3.15624300 | -2.22254800 | F | -2.14026600 | -0.01893100 | 2.30139700  |
| H      | 3.51414800  | -4.06595000 | -1.85794700 | C | -3.97093900 | -3.22149400 | -1.46360000 |
| C      | 1.68818700  | -4.96547200 | -1.09064900 | C | -3.26050700 | -2.91690300 | -2.62216800 |
| H      | 2.25115800  | -5.61480600 | -0.40670700 | C | -2.06136000 | -2.21715600 | -2.54033700 |
| H      | 1.46065100  | -5.55742300 | -1.98177400 | C | -1.54356900 | -1.80487000 | -1.30665600 |

|       |             |             |             |        |             |             |             |
|-------|-------------|-------------|-------------|--------|-------------|-------------|-------------|
| C     | -2.27087400 | -2.11285300 | -0.15462800 | H      | -1.27183300 | 0.11626300  | 2.64949400  |
| C     | -3.47209700 | -2.81497800 | -0.23075400 | H      | -2.06475600 | -1.32856300 | 2.06663600  |
| H     | -4.90596500 | -3.76894000 | -1.52268200 | C      | 0.07405600  | 1.23182200  | -0.32119300 |
| H     | -3.63908500 | -3.22604500 | -3.59138900 | C      | -0.34513800 | 2.25736200  | 0.53098400  |
| H     | -1.50965400 | -1.98536800 | -3.44835300 | F      | -1.31500800 | 2.02449500  | 1.42651800  |
| H     | -1.90922900 | -1.79144000 | 0.81622000  | C      | 0.15707600  | 3.55146300  | 0.52158700  |
| H     | -4.01858400 | -3.04016300 | 0.67969800  | F      | -0.31007600 | 4.47163600  | 1.36289800  |
| C     | -0.21467100 | -1.08284300 | -1.28847900 | C      | 1.15700700  | 3.89255300  | -0.38207400 |
| H     | 0.47808000  | -1.62060400 | -1.95270500 | F      | 1.66320400  | 5.12203000  | -0.40131700 |
| H     | -0.28198200 | -0.13232500 | -1.82118500 | C      | 1.62653900  | 2.91871700  | -1.24542200 |
| N12_P |             |             |             | F      | 2.63284300  | 3.18499100  | -2.08322300 |
| N     | 2.37982800  | -0.33172200 | 0.81948100  | C      | 1.08626900  | 1.63729300  | -1.18297600 |
| H     | 1.94528000  | -0.21962900 | -0.10554800 | F      | 1.73112600  | 0.72825000  | -1.96128900 |
| B     | -0.59063100 | -0.30560600 | -0.22207300 | C      | -2.24831300 | -0.19317700 | -0.28745600 |
| C     | 1.22516600  | -0.48547800 | 1.83160100  | C      | -3.03433900 | 0.89595300  | -0.65591600 |
| H     | 1.03018100  | 0.54960100  | 2.13886300  | F      | -2.49391600 | 2.09276600  | -0.94558700 |
| C     | -0.08346500 | -1.02655100 | 1.22986100  | C      | -4.42127100 | 0.84927000  | -0.78112500 |
| H     | 0.07433800  | -2.09655500 | 1.04330100  | F      | -5.10143800 | 1.94239200  | -1.13104500 |
| C     | 3.14531700  | 0.92438000  | 1.14088800  | C      | -5.09617800 | -0.33755300 | -0.55792900 |
| H     | 3.53897900  | 0.77735200  | 2.15214300  | F      | -6.42121300 | -0.39946900 | -0.67532600 |
| H     | 2.41554800  | 1.73582800  | 1.16462500  | C      | -4.36417100 | -1.46665400 | -0.21895700 |
| C     | 4.26976000  | 1.20651200  | 0.15784900  | F      | -4.98590400 | -2.62902100 | -0.01071000 |
| H     | 3.85078800  | 1.42387000  | -0.83120400 | C      | -2.98654600 | -1.36548200 | -0.11158800 |
| H     | 4.78312500  | 2.11305200  | 0.49203100  | F      | -2.34280900 | -2.51704100 | 0.18632700  |
| C     | 5.21957500  | 0.01503400  | 0.06967700  | C      | 2.73005300  | -4.37622900 | -1.66646400 |
| H     | 5.71025400  | -0.14530600 | 1.03866400  | C      | 2.90770700  | -3.22914000 | -2.43144000 |
| H     | 6.00602600  | 0.20630000  | -0.66466100 | C      | 1.96081700  | -2.20327300 | -2.40171300 |
| C     | 4.41100600  | -1.21579200 | -0.32643200 | C      | 0.80685000  | -2.29703100 | -1.61438100 |
| H     | 3.96589100  | -1.05509000 | -1.31233700 | C      | 0.61973600  | -3.49134700 | -0.89256700 |
| H     | 5.03299000  | -2.11232700 | -0.40445700 | C      | 1.56722100  | -4.50779800 | -0.90498800 |
| C     | 3.30382700  | -1.51395400 | 0.67921300  | H      | 3.46613100  | -5.17361000 | -1.68979900 |
| H     | 2.69296500  | -2.36824300 | 0.37484100  | H      | 3.78746100  | -3.12829600 | -3.06165800 |
| H     | 3.73292400  | -1.70319200 | 1.66525400  | H      | 2.10499600  | -1.32379900 | -3.02347200 |
| C     | 1.71269600  | -1.25500100 | 3.06047000  | H      | -0.30804800 | -3.62334800 | -0.34359800 |
| H     | 1.87291800  | -2.30697800 | 2.79320100  | H      | 1.38845300  | -5.41673200 | -0.33801400 |
| H     | 2.66790000  | -0.85613700 | 3.42624700  | C      | -0.26257000 | -1.23659600 | -1.59809500 |
| C     | 0.66316300  | -1.17970600 | 4.16827300  | H      | -0.12449200 | -0.57334100 | -2.45744700 |
| H     | 1.00447100  | -1.75116500 | 5.03690500  | H      | -1.19091300 | -1.77761800 | -1.80292500 |
| H     | 0.55353800  | -0.13657200 | 4.49331300  | N13_TS |             |             |             |
| C     | -0.67410500 | -1.69553300 | 3.65052600  | N      | -2.31005900 | -0.77451800 | 0.98779700  |
| H     | -1.44108600 | -1.60372000 | 4.42653500  | H      | -0.80274800 | -0.50175300 | 1.14989800  |
| H     | -0.58321400 | -2.76490100 | 3.41637100  | B      | 0.20148600  | -0.18934200 | -0.22269700 |
| C     | -1.10403200 | -0.93678600 | 2.39403200  | C      | -2.36868100 | -0.52987500 | -0.48998800 |

|   |             |             |             |       |             |             |             |
|---|-------------|-------------|-------------|-------|-------------|-------------|-------------|
| H | -2.47149100 | 0.55808600  | -0.57784500 | C     | -0.96018900 | 3.55351200  | 0.54424600  |
| C | -1.00196900 | -0.91273300 | -1.04402100 | F     | -1.49537600 | 4.25217400  | 1.54524300  |
| H | -0.93029800 | -0.56769200 | -2.08264000 | C     | -0.74647600 | 4.15061100  | -0.68676600 |
| H | -0.87585000 | -1.99628200 | -1.07593000 | F     | -1.06500300 | 5.42639600  | -0.88136800 |
| C | -2.50047100 | -2.20315600 | 1.33351100  | C     | -0.19727300 | 3.39628200  | -1.71576200 |
| H | -1.75158800 | -2.78794600 | 0.78818100  | F     | 0.00925800  | 3.95227400  | -2.90697700 |
| H | -3.49208100 | -2.52664200 | 0.98591400  | C     | 0.11794900  | 2.06550800  | -1.48824700 |
| C | -2.39743500 | -2.46460300 | 2.83577300  | F     | 0.62464500  | 1.38456200  | -2.52512500 |
| H | -1.37522900 | -2.28914900 | 3.18563000  | C     | 4.41332300  | 0.43976400  | 2.57156200  |
| H | -2.61250600 | -3.52338700 | 3.01002600  | C     | 4.09438400  | -0.90189400 | 2.37458300  |
| C | -3.36853900 | -1.57862000 | 3.61406100  | C     | 2.78042700  | -1.27271500 | 2.11528800  |
| H | -4.39942200 | -1.86552800 | 3.36772900  | C     | 1.76084700  | -0.31702600 | 2.03591900  |
| H | -3.24255500 | -1.72280000 | 4.69093300  | C     | 2.08358700  | 1.01869500  | 2.28068100  |
| C | -3.15314200 | -0.11598200 | 3.23148500  | C     | 3.40083200  | 1.39238000  | 2.53682100  |
| H | -3.88742200 | 0.52963500  | 3.72284500  | H     | 5.43935000  | 0.73680400  | 2.76181100  |
| H | -2.16247500 | 0.22300400  | 3.55703800  | H     | 4.86949100  | -1.66094700 | 2.41690800  |
| C | -3.27782200 | 0.06371400  | 1.72314500  | H     | 2.53929200  | -2.31951700 | 1.94643900  |
| H | -4.29808000 | -0.20539600 | 1.40481000  | H     | 1.30835600  | 1.77392600  | 2.27433200  |
| H | -3.10027000 | 1.10516700  | 1.44153900  | H     | 3.63293800  | 2.43881900  | 2.70739000  |
| C | -3.57510900 | -1.14034100 | -1.18147600 | C     | 0.35973600  | -0.79187700 | 1.70458300  |
| C | -4.74545100 | -0.38712400 | -1.31093000 | H     | 0.36245900  | -1.88195800 | 1.61927200  |
| H | -4.76228300 | 0.63509400  | -0.93964400 | H     | -0.25022600 | -0.53975500 | 2.58244600  |
| C | -5.87891700 | -0.91798400 | -1.92044600 |       |             |             |             |
| H | -6.77575600 | -0.31379500 | -2.01330900 | N13_P |             |             |             |
| C | -5.85596000 | -2.21785800 | -2.41615300 | N     | -2.57807900 | 0.25041600  | -1.05313500 |
| H | -6.73590500 | -2.63563000 | -2.89445000 | H     | -1.73981800 | -0.29441500 | -1.29540500 |
| C | -4.69366300 | -2.97666900 | -2.30366600 | B     | 0.37749500  | 0.33234200  | -0.15175100 |
| H | -4.66417000 | -3.98798400 | -2.69656700 | C     | -2.24801000 | 0.87035900  | 0.31917400  |
| C | -3.56309000 | -2.44094500 | -1.69487700 | H     | -2.28851100 | -0.00036200 | 0.98243900  |
| H | -2.66129200 | -3.04174900 | -1.62446700 | C     | -0.82163800 | 1.40397600  | 0.30556100  |
| C | 1.65499300  | -0.71561400 | -0.69221700 | H     | -0.63092600 | 1.72546100  | 1.33738800  |
| C | 2.75165900  | 0.11089700  | -0.93810200 | H     | -0.76358300 | 2.31593700  | -0.29642300 |
| F | 2.65804200  | 1.43927400  | -0.81321000 | C     | -2.75487800 | 1.25145700  | -2.15408100 |
| C | 4.00957900  | -0.36776500 | -1.28193000 | H     | -1.86936900 | 1.89016800  | -2.14435600 |
| F | 5.01785400  | 0.47384500  | -1.49840100 | H     | -3.63265300 | 1.84950600  | -1.89478500 |
| C | 4.21851600  | -1.73402000 | -1.38848800 | C     | -2.93444200 | 0.55155800  | -3.49592300 |
| F | 5.41756100  | -2.20899900 | -1.71125100 | H     | -2.01403000 | 0.01246300  | -3.75195400 |
| C | 3.16470900  | -2.59975600 | -1.14030500 | H     | -3.07471900 | 1.32053300  | -4.26046300 |
| F | 3.35251600  | -3.91818900 | -1.20708600 | C     | -4.11692500 | -0.41644300 | -3.46013900 |
| C | 1.92443800  | -2.07838200 | -0.80129200 | H     | -5.04702200 | 0.14581700  | -3.30643300 |
| F | 0.98544800  | -2.99213600 | -0.47787900 | H     | -4.20977500 | -0.93810400 | -4.41590400 |
| C | -0.05771200 | 1.41780400  | -0.26435800 | C     | -3.93039000 | -1.42030900 | -2.32371400 |
| C | -0.62290000 | 2.21594000  | 0.72115000  | H     | -4.80187700 | -2.07382500 | -2.22668800 |
| F | -0.87809400 | 1.72132100  | 1.95471100  | H     | -3.06618600 | -2.06323300 | -2.51997700 |

|   |             |             |             |        |             |             |             |
|---|-------------|-------------|-------------|--------|-------------|-------------|-------------|
| C | -3.72653800 | -0.70948500 | -0.99244500 | H      | 2.90701900  | 1.56319400  | -2.49748200 |
| H | -4.60490700 | -0.12172600 | -0.70899300 | H      | 1.22872800  | -2.35018000 | -2.03724200 |
| H | -3.50058800 | -1.41670300 | -0.18919600 | H      | 3.42189600  | -3.35381700 | -2.54106300 |
| C | -3.34191500 | 1.82749500  | 0.74772800  | C      | 0.60023300  | 0.31262500  | -1.80788600 |
| C | -4.38644600 | 1.35858400  | 1.54964800  | H      | 0.61872700  | 1.36783900  | -2.11684000 |
| H | -4.39345700 | 0.31598100  | 1.86007700  | H      | -0.20288300 | -0.16242100 | -2.38801500 |
| C | -5.40206300 | 2.21025800  | 1.97488100  |        |             |             |             |
| H | -6.19936000 | 1.82906500  | 2.60436900  | N14_TS |             |             |             |
| C | -5.38271400 | 3.55070000  | 1.60248900  | B      | -0.35750300 | 0.16894000  | 0.10302300  |
| H | -6.16910700 | 4.22012100  | 1.93536500  | N      | 2.25489900  | -0.87876700 | -0.55589100 |
| C | -4.34074300 | 4.03405200  | 0.81480900  | H      | 0.80642600  | -0.72869900 | -0.96555300 |
| H | -4.31167600 | 5.08216300  | 0.53528800  | C      | 2.14952800  | -0.11930600 | 0.73144100  |
| C | -3.32446400 | 3.18114300  | 0.39579700  | H      | 2.27378700  | 0.92990600  | 0.43809500  |
| H | -2.50367300 | 3.57619300  | -0.19505400 | C      | 0.71821900  | -0.29911500 | 1.22590200  |
| C | 1.82900200  | 0.85240900  | 0.42152200  | H      | 0.56496100  | 0.32450800  | 2.11490000  |
| C | 2.85032900  | 0.00239000  | 0.84193900  | H      | 0.56382600  | -1.32663600 | 1.56104200  |
| F | 2.63693800  | -1.31788800 | 0.96039100  | C      | 2.47335300  | -2.33073700 | -0.36882200 |
| C | 4.13841700  | 0.42509300  | 1.14119600  | H      | 1.68831800  | -2.71447900 | 0.28986900  |
| F | 5.06666400  | -0.44521700 | 1.54122200  | H      | 3.44007800  | -2.48964700 | 0.13150500  |
| C | 4.46482300  | 1.76647800  | 1.01334500  | C      | 2.46001500  | -3.07541700 | -1.70126000 |
| F | 5.69603000  | 2.19309300  | 1.29321400  | H      | 2.64229000  | -4.13623700 | -1.50437100 |
| C | 3.49192000  | 2.65590400  | 0.58854700  | H      | 1.46595600  | -3.00551600 | -2.15673000 |
| F | 3.78787300  | 3.95060000  | 0.44295500  | C      | 3.51187200  | -2.50601400 | -2.65152400 |
| C | 2.21678200  | 2.18295400  | 0.30325300  | H      | 4.51327800  | -2.69029000 | -2.23999800 |
| F | 1.35186600  | 3.11050600  | -0.16386000 | H      | 3.46595700  | -3.00607800 | -3.62331900 |
| C | -0.05844700 | -1.12384200 | 0.52648900  | C      | 3.30417200  | -1.00062800 | -2.80731100 |
| C | -0.70713800 | -2.17424000 | -0.10772000 | H      | 4.09781800  | -0.55437300 | -3.41444900 |
| F | -0.97028400 | -2.12203500 | -1.44858900 | H      | 2.35833100  | -0.80057800 | -3.32525300 |
| C | -1.19436400 | -3.31819400 | 0.51779500  | C      | 3.28923700  | -0.31563200 | -1.44581800 |
| F | -1.83500400 | -4.25416700 | -0.18759200 | H      | 3.09072200  | 0.75342200  | -1.55709200 |
| C | -1.03500100 | -3.45323800 | 1.88494800  | H      | 4.27434800  | -0.43360200 | -0.96571600 |
| F | -1.49658200 | -4.52756500 | 2.52014100  | C      | 3.25290800  | -0.42662200 | 1.72812900  |
| C | -0.40181600 | -2.43360700 | 2.58664600  | C      | 4.42468500  | 0.33560900  | 1.71040200  |
| F | -0.25495900 | -2.53975800 | 3.90567000  | H      | 4.51432600  | 1.15508100  | 1.00083900  |
| C | 0.05029700  | -1.31037300 | 1.90867900  | C      | 5.46554800  | 0.07541200  | 2.59731300  |
| F | 0.61240200  | -0.36036600 | 2.66632800  | H      | 6.36370700  | 0.68405500  | 2.57088000  |
| C | 4.41524000  | -1.46406500 | -2.80233400 | C      | 5.34642200  | -0.95628100 | 3.52331500  |
| C | 4.26043800  | -0.08027700 | -2.79373600 | H      | 6.15252600  | -1.15975800 | 4.22073700  |
| C | 3.01912800  | 0.48121600  | -2.51322900 | C      | 4.18125800  | -1.71828500 | 3.55849800  |
| C | 1.90669700  | -0.31805300 | -2.22430000 | H      | 4.07631300  | -2.51727900 | 4.28546200  |
| C | 2.07645600  | -1.70612600 | -2.24875900 | C      | 3.14346000  | -1.45377000 | 2.67018400  |
| C | 3.31494800  | -2.27320700 | -2.53501100 | H      | 2.23688400  | -2.04972900 | 2.71856600  |
| H | 5.38305300  | -1.90695900 | -3.01447900 | C      | -1.92450700 | -0.00969600 | 0.50008600  |
| H | 5.10861900  | 0.56469100  | -3.00339900 | C      | -2.93092200 | 0.57518800  | -0.27019800 |

|       |             |             |             |   |             |             |             |
|-------|-------------|-------------|-------------|---|-------------|-------------|-------------|
| F     | -2.61534200 | 1.24562300  | -1.39337700 | C | 2.92416200  | -1.40125300 | -0.78830600 |
| C     | -4.28398500 | 0.50301600  | 0.02763000  | H | 2.08648900  | -2.08309400 | -0.62142300 |
| F     | -5.18697900 | 1.08118700  | -0.76158800 | H | 3.73968300  | -1.64899300 | -0.10330500 |
| C     | -4.68956700 | -0.17200000 | 1.16921300  | C | 3.39279700  | -1.42909700 | -2.23657500 |
| F     | -5.97879500 | -0.25771100 | 1.47851300  | H | 3.72060500  | -2.44732500 | -2.46393800 |
| C     | -3.73302100 | -0.76662800 | 1.97631200  | H | 2.54207800  | -1.22048500 | -2.89623700 |
| F     | -4.10487900 | -1.42215000 | 3.07457300  | C | 4.50366900  | -0.40767500 | -2.47654800 |
| C     | -2.38939700 | -0.66781300 | 1.63634900  | H | 5.38752400  | -0.67829100 | -1.88476800 |
| F     | -1.54203800 | -1.28489900 | 2.47610300  | H | 4.80565900  | -0.41130500 | -3.52693800 |
| C     | -0.04693500 | 1.71256500  | -0.33071500 | C | 4.02048000  | 0.98469000  | -2.07081700 |
| C     | 0.56667400  | 2.18255800  | -1.48526400 | H | 4.82064200  | 1.72453900  | -2.16196600 |
| F     | 0.96804900  | 1.33137100  | -2.45339800 | H | 3.20422200  | 1.30996000  | -2.72529400 |
| C     | 0.83237200  | 3.52529800  | -1.73046800 | C | 3.52826200  | 0.99721800  | -0.62948800 |
| F     | 1.42882800  | 3.89909000  | -2.86176400 | H | 3.09491600  | 1.96499400  | -0.36032000 |
| C     | 0.47720500  | 4.47373200  | -0.78524800 | H | 4.33019900  | 0.76033300  | 0.07679500  |
| F     | 0.72317500  | 5.76285900  | -0.99652100 | C | 2.81046800  | -0.38170000 | 2.04617400  |
| C     | -0.12870500 | 4.05886900  | 0.39252700  | C | 3.58908500  | 0.57462500  | 2.70432700  |
| F     | -0.46660600 | 4.95523600  | 1.31600600  | H | 3.46956700  | 1.62572000  | 2.45064800  |
| C     | -0.36965500 | 2.70673100  | 0.59363800  | C | 4.49612300  | 0.20387900  | 3.69309100  |
| F     | -0.94010500 | 2.37090400  | 1.76043600  | H | 5.08454000  | 0.96274300  | 4.19829000  |
| C     | -1.99023100 | -4.89268600 | -1.46933100 | C | 4.63475600  | -1.13652700 | 4.03822800  |
| C     | -1.84318900 | -4.19272300 | -2.66460800 | H | 5.33666200  | -1.43092100 | 4.81165200  |
| C     | -1.31691800 | -2.90651800 | -2.65663500 | C | 3.85681400  | -2.09851200 | 3.39816700  |
| C     | -0.92673600 | -2.28544100 | -1.46304800 | H | 3.94967300  | -3.14397200 | 3.67348000  |
| C     | -1.08420300 | -2.99854200 | -0.27260200 | C | 2.94732600  | -1.72432300 | 2.41456000  |
| C     | -1.60994400 | -4.28969600 | -0.27607400 | H | 2.33254300  | -2.48280200 | 1.93913700  |
| H     | -2.39920900 | -5.89775800 | -1.46958400 | C | -2.16282800 | -0.41012600 | 0.17072100  |
| H     | -2.13857000 | -4.64862300 | -3.60442100 | C | -3.15669700 | 0.17249800  | -0.61550600 |
| H     | -1.20304400 | -2.36689100 | -3.59408300 | F | -2.81598100 | 0.91813300  | -1.68333500 |
| H     | -0.81358600 | -2.54618100 | 0.67449800  | C | -4.51852500 | 0.04134700  | -0.38057600 |
| H     | -1.72425900 | -4.82058400 | 0.66381500  | F | -5.41026400 | 0.63408900  | -1.17608700 |
| C     | -0.34479500 | -0.89158900 | -1.55087700 | C | -4.95016900 | -0.71326000 | 0.69990200  |
| H     | 0.31678900  | -0.85862000 | -2.42832000 | F | -6.25106900 | -0.85820400 | 0.94675400  |
| H     | -1.09784000 | -0.16536700 | -1.86286500 | C | -4.00768900 | -1.32362300 | 1.51153000  |
|       |             |             |             | F | -4.40368700 | -2.06496800 | 2.54820500  |
| N14_P |             |             |             | C | -2.65566600 | -1.15332600 | 1.23710800  |
| B     | -0.57808600 | -0.16370000 | -0.23015600 | F | -1.81544500 | -1.80453800 | 2.06860400  |
| N     | 2.45693400  | -0.02562300 | -0.41365700 | C | -0.40039300 | 1.49827700  | -0.35641000 |
| H     | 1.68741100  | 0.20068500  | -1.05819100 | C | 0.24935000  | 2.22032100  | -1.35059200 |
| C     | 1.82349500  | 0.06376300  | 0.98592200  | F | 0.84895800  | 1.58444800  | -2.39499100 |
| H     | 1.67201400  | 1.14238900  | 1.10242600  | C | 0.41358700  | 3.60214900  | -1.35763500 |
| C     | 0.45799100  | -0.61531000 | 0.99119600  | F | 1.07154800  | 4.20173300  | -2.35205100 |
| H     | 0.02242900  | -0.33524500 | 1.95598600  | C | -0.10352600 | 4.34840200  | -0.31318200 |
| H     | 0.57949800  | -1.70234700 | 1.03324400  | F | 0.03948100  | 5.67107000  | -0.28825100 |

|        |             |             |             |   |             |             |             |
|--------|-------------|-------------|-------------|---|-------------|-------------|-------------|
| C      | -0.74900200 | 3.68777000  | 0.72395100  | C | 3.37756300  | -1.13207200 | 2.36254600  |
| F      | -1.22652800 | 4.38638500  | 1.75215400  | H | 2.57397400  | -1.86165400 | 2.35367700  |
| C      | -0.87308100 | 2.30476700  | 0.68455800  | C | -1.88250400 | -0.53736300 | 0.39579200  |
| F      | -1.46435500 | 1.74723900  | 1.75195900  | C | -3.00828200 | -0.13866500 | -0.32707000 |
| C      | 0.15261300  | -5.26716500 | -1.79828600 | F | -2.86421600 | 0.61303000  | -1.43301600 |
| C      | 0.56880400  | -4.46165400 | -2.85572800 | C | -4.31126800 | -0.48285200 | 0.00388300  |
| C      | 0.38565300  | -3.08460200 | -2.79377000 | F | -5.33419200 | -0.06859600 | -0.74050900 |
| C      | -0.20843200 | -2.46173400 | -1.68427000 | C | -4.54032300 | -1.25607600 | 1.13206300  |
| C      | -0.63127000 | -3.29218600 | -0.63907600 | F | -5.77766800 | -1.59672700 | 1.47500000  |
| C      | -0.45208200 | -4.67430300 | -0.69555000 | C | -3.46031400 | -1.68098200 | 1.88991600  |
| H      | 0.29282100  | -6.34265000 | -1.83750700 | F | -3.66222700 | -2.43224900 | 2.97048000  |
| H      | 1.03040500  | -4.90650200 | -3.73243200 | C | -2.17376500 | -1.31126800 | 1.51744800  |
| H      | 0.69550300  | -2.46797700 | -3.63553500 | F | -1.19090000 | -1.78628300 | 2.29977500  |
| H      | -1.09758000 | -2.86412700 | 0.23953300  | C | -0.46984800 | 1.61618700  | -0.25993200 |
| H      | -0.79049200 | -5.28830200 | 0.13371400  | C | -0.14293000 | 2.34221800  | -1.39875500 |
| C      | -0.34510900 | -0.94913100 | -1.67900100 | F | 0.31794900  | 1.72785500  | -2.50632800 |
| H      | 0.49843000  | -0.57700500 | -2.27382700 | C | -0.24385000 | 3.72628300  | -1.49046000 |
| H      | -1.20324800 | -0.68584000 | -2.31222800 | F | 0.09080500  | 4.35367500  | -2.61712700 |
| N15_TS |             |             |             | C | -0.69872200 | 4.45152900  | -0.40155500 |
| N      | 2.37549200  | -0.19338500 | -0.77524400 | F | -0.80621300 | 5.77422300  | -0.47051600 |
| B      | -0.39630900 | 0.00649100  | 0.00631200  | C | -1.03466800 | 3.77847000  | 0.76477000  |
| C      | 2.12019600  | 0.25410800  | 0.63247900  | F | -1.47010700 | 4.45921300  | 1.82193400  |
| H      | 1.98119800  | 1.33881400  | 0.55428000  | C | -0.91204800 | 2.39668900  | 0.81059200  |
| C      | 0.78548100  | -0.35590300 | 1.05295100  | F | -1.24719100 | 1.80834500  | 1.96929000  |
| H      | 0.51263900  | 0.03257300  | 2.03997900  | H | 4.89452700  | -1.29574600 | 0.10178600  |
| H      | 0.88573500  | -1.43812300 | 1.17679400  | H | 3.63901700  | 1.29039000  | -3.60046500 |
| C      | 2.95933700  | -1.55359300 | -0.90392300 | H | 2.60745600  | -1.96329500 | -1.85683900 |
| C      | 4.48262200  | -1.67120100 | -0.83588000 | H | 2.49954900  | -2.17502100 | -0.12986300 |
| H      | 4.97094300  | -1.14599100 | -1.66073600 | H | 2.56283100  | 1.76517100  | -1.43946500 |
| H      | 4.74638100  | -2.72868500 | -0.92251800 | H | 4.10903800  | 0.94567300  | -1.20429000 |
| C      | 3.11995900  | 0.48782200  | -3.07104000 | H | 0.91898300  | -0.40570200 | -1.15166800 |
| H      | 2.11206600  | 0.41899200  | -3.48427700 | C | 0.04764500  | -5.21016000 | -1.97514900 |
| H      | 3.64785100  | -0.44513000 | -3.28205300 | C | 0.26983400  | -4.41421200 | -3.09562000 |
| C      | 3.08536400  | 0.81471100  | -1.58333100 | C | 0.20701300  | -3.02971800 | -2.98762200 |
| C      | 3.28155500  | 0.02162600  | 1.58044900  | C | -0.08050000 | -2.40180000 | -1.76853800 |
| C      | 4.31517500  | 0.96103100  | 1.64906300  | C | -0.30047000 | -3.21497300 | -0.65232000 |
| H      | 4.23775300  | 1.88148500  | 1.07479300  | C | -0.23649700 | -4.60341600 | -0.75690500 |
| C      | 5.43689500  | 0.73524500  | 2.44085500  | H | 0.09676300  | -6.29147500 | -2.05147400 |
| H      | 6.23053100  | 1.47475000  | 2.47878800  | H | 0.49220200  | -4.87053900 | -4.05514800 |
| C      | 5.53534900  | -0.43482200 | 3.18973300  | H | 0.38549000  | -2.41575700 | -3.86781200 |
| H      | 6.40896200  | -0.61581600 | 3.80758300  | H | -0.51823100 | -2.77814000 | 0.31389100  |
| C      | 4.49743400  | -1.36191000 | 3.15632200  | H | -0.41181800 | -5.21072500 | 0.12570300  |
| H      | 4.55695000  | -2.26672400 | 3.75279300  | C | -0.11959100 | -0.88987000 | -1.74369000 |
|        |             |             |             | H | 0.39352800  | -0.52373000 | -2.64088700 |

|       |             |             |             |        |             |             |             |
|-------|-------------|-------------|-------------|--------|-------------|-------------|-------------|
| H     | -1.12063600 | -0.49711200 | -1.92069900 | F      | -0.92966400 | 4.45829200  | 1.87394100  |
|       |             |             |             | C      | 0.92601300  | 4.46149800  | 0.41378400  |
| N15_P |             |             |             | F      | 0.99542300  | 5.79058600  | 0.45077600  |
| N     | -2.64115700 | -0.22771700 | 0.56331800  | C      | 1.80406200  | 3.72756800  | -0.36936700 |
| B     | 0.63760700  | -0.05926100 | 0.30104600  | F      | 2.72347700  | 4.36186300  | -1.09572300 |
| C     | -1.90868200 | 0.30299900  | -0.68712100 | C      | 1.70949400  | 2.34042800  | -0.40389400 |
| H     | -1.75795700 | 1.36354900  | -0.46313100 | F      | 2.57952800  | 1.73528500  | -1.22341200 |
| C     | -0.55968500 | -0.39511400 | -0.80263700 | H      | -4.82530700 | -1.22066300 | -0.97020900 |
| H     | -0.16962500 | -0.10595100 | -1.78671000 | H      | -4.34646000 | -0.61434800 | 2.71043700  |
| H     | -0.72335200 | -1.47370800 | -0.87772800 | H      | -3.03607700 | -2.12477900 | 1.38204800  |
| C     | -3.17800800 | -1.63971800 | 0.41465700  | H      | -2.51608300 | -2.13997800 | -0.29088100 |
| C     | -4.62733700 | -1.74702700 | -0.03457500 | H      | -3.21828700 | 1.71947300  | 1.04906200  |
| H     | -5.32721900 | -1.39766500 | 0.72845200  | H      | -4.53711400 | 0.67856700  | 0.49174100  |
| H     | -4.83149800 | -2.80777100 | -0.19905200 | H      | -1.88501000 | -0.28748900 | 1.25980700  |
| C     | -3.95145200 | 0.39655200  | 2.58000100  | C      | -1.77189100 | -4.27641100 | 2.59927400  |
| H     | -4.68950500 | 1.10317100  | 2.96460200  | C      | -1.89742800 | -3.18921400 | 3.46002000  |
| H     | -3.04394600 | 0.49577600  | 3.18253400  | C      | -1.17963000 | -2.01933500 | 3.21264600  |
| C     | -3.65214600 | 0.72333100  | 1.12690700  | C      | -0.31891100 | -1.89765200 | 2.11075400  |
| C     | -2.82481500 | 0.20221600  | -1.89013000 | C      | -0.19933400 | -3.00989800 | 1.26313600  |
| C     | -3.78944200 | 1.19098400  | -2.10804300 | C      | -0.91423200 | -4.18025700 | 1.50383400  |
| H     | -3.82582200 | 2.05768200  | -1.45204200 | H      | -2.32463200 | -5.19172300 | 2.78503400  |
| C     | -4.69420400 | 1.08630200  | -3.15996800 | H      | -2.54760200 | -3.25039100 | 4.32804400  |
| H     | -5.43729900 | 1.86183200  | -3.31412100 | H      | -1.26548100 | -1.18209600 | 3.90271400  |
| C     | -4.63353400 | -0.00694200 | -4.02029500 | H      | 0.45541300  | -2.95388500 | 0.39850600  |
| H     | -5.33596500 | -0.09192900 | -4.84290300 | H      | -0.79896700 | -5.02486100 | 0.83093800  |
| C     | -3.65192900 | -0.97751400 | -3.83564900 | C      | 0.43384400  | -0.60930100 | 1.87512500  |
| H     | -3.58334700 | -1.81744400 | -4.51920600 | H      | -0.01009000 | 0.14622700  | 2.53091200  |
| C     | -2.74953500 | -0.87164600 | -2.78094300 | H      | 1.44432600  | -0.74026200 | 2.28054800  |
| H     | -1.97549600 | -1.62333100 | -2.65830500 |        |             |             |             |
| C     | 2.05081900  | -0.76316900 | -0.21220700 | N16_TS |             |             |             |
| C     | 3.24877200  | -0.40299000 | 0.40945900  | N      | -2.36024100 | 0.81717500  | -0.54891900 |
| F     | 3.23946200  | 0.54964700  | 1.35861400  | H      | -0.91572500 | 0.97458700  | -0.85730400 |
| C     | 4.48737400  | -0.95001400 | 0.11648900  | B      | 0.38812000  | -0.00263700 | 0.19967100  |
| F     | 5.58629200  | -0.54018000 | 0.75193400  | C      | -2.16209000 | 0.01900700  | 0.70103200  |
| C     | 4.57918500  | -1.93767800 | -0.85498900 | H      | -2.05549000 | -1.00230200 | 0.32330800  |
| F     | 5.75532200  | -2.48692000 | -1.15377400 | C      | -0.77053900 | 0.31881300  | 1.35034500  |
| C     | 3.42569500  | -2.34932900 | -1.49713100 | C      | -2.98175800 | 2.15524600  | -0.38604700 |
| F     | 3.48413500  | -3.31133400 | -2.42135700 | H      | -2.42948600 | 2.72171500  | 0.36158300  |
| C     | 2.20731300  | -1.75950300 | -1.16957300 | H      | -4.00950000 | 2.02318700  | -0.01912200 |
| F     | 1.14691400  | -2.27077100 | -1.83625400 | C      | -3.02623800 | 2.91791800  | -1.70698800 |
| C     | 0.78373400  | 1.59852900  | 0.33222500  | H      | -2.00616500 | 3.08937600  | -2.06729200 |
| C     | -0.08120800 | 2.39891300  | 1.07193500  | H      | -3.46395600 | 3.90327300  | -1.51916500 |
| F     | -1.11272200 | 1.83841300  | 1.77096600  | C      | -3.83706200 | 2.14788300  | -2.74544900 |
| C     | -0.03974100 | 3.78479200  | 1.13945000  | H      | -4.88457700 | 2.09655200  | -2.42044500 |

|   |             |             |             |       |             |             |             |
|---|-------------|-------------|-------------|-------|-------------|-------------|-------------|
| H | -3.82404200 | 2.66088300  | -3.71152400 | C     | -0.71170500 | 1.74352200  | 1.92783300  |
| C | -3.27830500 | 0.73331400  | -2.87510000 | H     | 0.18982400  | 1.88681100  | 2.51732600  |
| H | -3.90447000 | 0.11954300  | -3.52999700 | H     | -0.71376700 | 2.51849500  | 1.16089900  |
| H | -2.28125400 | 0.76448800  | -3.32839500 | H     | -1.55091400 | 1.91586700  | 2.60754500  |
| C | -3.19122100 | 0.05182900  | -1.51394600 | C     | 1.62247600  | 5.42058600  | -1.05721900 |
| H | -4.19975400 | -0.05591200 | -1.08319500 | C     | 0.97189300  | 4.94777900  | -2.19204900 |
| H | -2.76967600 | -0.94860700 | -1.61713800 | C     | 0.53635800  | 3.62767600  | -2.24467000 |
| C | -3.37935900 | -0.05601300 | 1.61996400  | C     | 0.72395100  | 2.74346100  | -1.17257900 |
| C | -3.98182500 | -1.31051700 | 1.77789900  | C     | 1.39112800  | 3.23649400  | -0.04578900 |
| H | -3.56957000 | -2.16330600 | 1.24331300  | C     | 1.83173900  | 4.55587700  | 0.01211300  |
| C | -5.08395600 | -1.49616200 | 2.60646400  | H     | 1.96591300  | 6.44870800  | -1.00794500 |
| H | -5.52197900 | -2.48392400 | 2.70800400  | H     | 0.80637200  | 5.60295800  | -3.04159700 |
| C | -5.61885000 | -0.41675700 | 3.30074800  | H     | 0.04934100  | 3.26552300  | -3.14792500 |
| H | -6.47795000 | -0.55227300 | 3.94974900  | H     | 1.56365600  | 2.59315700  | 0.80664100  |
| C | -5.04072600 | 0.84043500  | 3.15466500  | H     | 2.34234400  | 4.90592400  | 0.90384700  |
| H | -5.44971300 | 1.69237000  | 3.68858500  | C     | 0.25790600  | 1.31218300  | -1.34598100 |
| C | -3.93598200 | 1.01988700  | 2.32684700  | H     | -0.36139200 | 1.28808700  | -2.25390600 |
| H | -3.52006500 | 2.01537000  | 2.23480200  | H     | 1.07325700  | 0.68542400  | -1.69850000 |
| C | 2.00798900  | 0.12010000  | 0.52400100  |       |             |             |             |
| C | 2.93108100  | -0.28048500 | -0.45421300 | N16_P |             |             |             |
| F | 2.51742200  | -0.68032200 | -1.67251500 | N     | 2.44535300  | -0.15022500 | 0.01096900  |
| C | 4.30859900  | -0.30855800 | -0.28955500 | H     | 1.79005300  | -0.53704800 | -0.68747400 |
| F | 5.09803600  | -0.69698600 | -1.28816900 | B     | -0.75767100 | -0.44327700 | 0.07085200  |
| C | 4.85686100  | 0.04972900  | 0.93050300  | C     | 1.57831900  | 0.33324300  | 1.20355600  |
| F | 6.17089100  | 0.02334800  | 1.11919800  | H     | 1.26095200  | 1.31509800  | 0.84652300  |
| C | 4.00121900  | 0.43446500  | 1.94684300  | C     | 0.23467100  | -0.42731500 | 1.44745500  |
| F | 4.49255800  | 0.77919300  | 3.13534200  | C     | 3.47390500  | -1.21120400 | 0.30208000  |
| C | 2.62720100  | 0.45271800  | 1.73036300  | H     | 2.95823200  | -2.06938200 | 0.72773200  |
| F | 1.92346900  | 0.84518000  | 2.80384400  | H     | 4.14618500  | -0.78587800 | 1.04995400  |
| C | 0.20809700  | -1.50325700 | -0.46144400 | C     | 4.23269400  | -1.60801700 | -0.95558000 |
| C | -0.30998600 | -1.85056000 | -1.70554100 | H     | 3.53394400  | -2.04053200 | -1.67566600 |
| F | -0.72434500 | -0.90519900 | -2.57247900 | H     | 4.93599900  | -2.39920100 | -0.67914800 |
| C | -0.43946800 | -3.15525600 | -2.16687900 | C     | 4.94515000  | -0.41443500 | -1.58257200 |
| F | -0.97347000 | -3.39615700 | -3.36339900 | H     | 5.71161900  | -0.02777000 | -0.89845800 |
| C | -0.00241300 | -4.20536000 | -1.37677700 | H     | 5.45182200  | -0.71398500 | -2.50347600 |
| F | -0.11950500 | -5.46121700 | -1.79458200 | C     | 3.91163000  | 0.67016900  | -1.87025300 |
| C | 0.56309000  | -3.92100800 | -0.14360600 | H     | 4.37791200  | 1.58402600  | -2.24980500 |
| F | 1.01028200  | -4.91092400 | 0.62530800  | H     | 3.20477700  | 0.32654100  | -2.63277800 |
| C | 0.66586900  | -2.60042000 | 0.27555200  | C     | 3.14192300  | 1.03616300  | -0.61033700 |
| F | 1.26601800  | -2.42122500 | 1.46139700  | H     | 3.80900800  | 1.42004100  | 0.16871300  |
| C | -0.66822800 | -0.66466900 | 2.53628000  | H     | 2.38022500  | 1.78852800  | -0.81432700 |
| H | -1.37677200 | -0.37204200 | 3.31888200  | C     | 2.46391200  | 0.60670000  | 2.41027700  |
| H | -0.91957400 | -1.68869800 | 2.24125900  | C     | 2.73961700  | 1.94035700  | 2.72924400  |
| H | 0.32951600  | -0.67289700 | 2.97055600  | H     | 2.33075100  | 2.72987100  | 2.10283900  |



|   |             |             |             |        |             |             |             |
|---|-------------|-------------|-------------|--------|-------------|-------------|-------------|
| C | 3.50706300  | 2.27690000  | 3.84115800  | H      | 3.36453900  | -4.73257300 | -3.29198200 |
| H | 3.70014400  | 3.32031200  | 4.06729000  | H      | 2.36570600  | -2.82715400 | -4.54349900 |
| C | 4.01532500  | 1.27532600  | 4.66050800  | H      | 0.64912800  | -1.41769700 | -3.49656900 |
| H | 4.61139800  | 1.52981300  | 5.53056600  | H      | 0.86096100  | -3.78943600 | 0.05949600  |
| C | 3.74822600  | -0.05831700 | 4.36017100  | H      | 2.60409400  | -5.18416900 | -0.96533800 |
| H | 4.13544500  | -0.84696400 | 4.99698800  | C      | -0.55452200 | -1.72583400 | -1.03244900 |
| C | 2.97886900  | -0.39069600 | 3.24988500  | H      | -1.16659200 | -1.42702300 | -1.89131300 |
| H | 2.78057200  | -1.43529600 | 3.04153100  | H      | -1.12414000 | -2.53048700 | -0.55190100 |
| C | -2.39572700 | -0.68262100 | 0.38574000  |        |             |             |             |
| C | -3.30711400 | -0.35703100 | -0.62791000 | N19_TS |             |             |             |
| F | -2.88063000 | 0.18706800  | -1.78524500 | B      | 0.49180300  | -0.11431300 | 0.23401800  |
| C | -4.67827300 | -0.56101900 | -0.56668100 | C      | -0.15334400 | -0.33504200 | 1.70691900  |
| F | -5.46325000 | -0.20698900 | -1.58524500 | C      | 0.45956000  | -1.21166500 | 2.61307900  |
| C | -5.23102200 | -1.15020800 | 0.55914600  | H      | 1.30631200  | -1.80724600 | 2.28267100  |
| F | -6.54298000 | -1.36083500 | 0.64454200  | C      | 0.05484300  | -1.34146200 | 3.93933500  |
| C | -4.38389000 | -1.52319000 | 1.58555500  | H      | 0.57088200  | -2.03495800 | 4.59576800  |
| F | -4.87959500 | -2.10796900 | 2.67776800  | C      | -0.98067800 | -0.55332100 | 4.42149300  |
| C | -3.01371800 | -1.29888900 | 1.47324400  | H      | -1.28394300 | -0.60677400 | 5.46214400  |
| F | -2.31277800 | -1.73964000 | 2.53878000  | C      | -1.63916300 | 0.29577000  | 3.53939000  |
| C | -0.68024000 | 1.07994300  | -0.61436800 | H      | -2.47537600 | 0.89409900  | 3.89471900  |
| C | 0.10193400  | 1.40533600  | -1.71083600 | C      | -1.27317300 | 0.37390500  | 2.19605800  |
| F | 0.88704900  | 0.45397500  | -2.28016900 | C      | -2.12186900 | 1.24508600  | 1.30379400  |
| C | 0.21567000  | 2.66603500  | -2.28369900 | H      | -1.50142000 | 2.01504300  | 0.85047000  |
| F | 1.04958900  | 2.87223500  | -3.30696900 | H      | -2.86792600 | 1.76489900  | 1.91065700  |
| C | -0.52476800 | 3.70940100  | -1.75529100 | N      | -2.78265700 | 0.51100100  | 0.18347100  |
| F | -0.43934400 | 4.93387800  | -2.26896700 | C      | -3.83572800 | -0.50369200 | 0.67259400  |
| C | -1.34621600 | 3.45308400  | -0.66615200 | C      | -4.55611500 | -1.12024600 | -0.53910900 |
| F | -2.06834900 | 4.44207200  | -0.14242900 | H      | -3.84662300 | -1.76512800 | -1.07024500 |
| C | -1.40771700 | 2.17188400  | -0.12890700 | H      | -5.33794200 | -1.77704300 | -0.14410000 |
| F | -2.24178500 | 2.03585400  | 0.91176700  | C      | -5.13665000 | -0.11057600 | -1.51121700 |
| C | -0.40212200 | 0.45395500  | 2.55482400  | H      | -5.92133300 | 0.49094100  | -1.03785900 |
| H | 0.13885400  | 0.34489000  | 3.50132700  | H      | -5.60628100 | -0.62565400 | -2.35469300 |
| H | -0.37818100 | 1.51533600  | 2.28658100  | C      | -4.00219300 | 0.77034900  | -2.00110400 |
| H | -1.44055500 | 0.19327200  | 2.73436900  | H      | -4.35642000 | 1.52099100  | -2.71553300 |
| C | 0.44502200  | -1.85445200 | 1.99449000  | H      | -3.27487400 | 0.14375900  | -2.53528800 |
| H | -0.42974000 | -2.47657900 | 1.80959400  | C      | -3.27429100 | 1.51562500  | -0.87104200 |
| H | 1.28655300  | -2.36182700 | 1.52090100  | C      | -2.09286400 | 2.24847300  | -1.53282400 |
| H | 0.61515900  | -1.85881200 | 3.07666200  | H      | -1.36434000 | 1.56765900  | -1.97017900 |
| C | 2.62586700  | -4.09209200 | -2.82118500 | H      | -1.56744800 | 2.93285700  | -0.86280700 |
| C | 2.06910800  | -3.02210100 | -3.51718000 | H      | -2.50139100 | 2.85219400  | -2.34777200 |
| C | 1.10615700  | -2.21227100 | -2.91719900 | C      | -4.18786600 | 2.61253500  | -0.29468500 |
| C | 0.65736300  | -2.44140600 | -1.60435300 | H      | -3.70962500 | 3.15180700  | 0.52599700  |
| C | 1.23500900  | -3.52977100 | -0.92651900 | H      | -5.15345200 | 2.24709000  | 0.04833100  |
| C | 2.20368000  | -4.33842500 | -1.51667400 | H      | -4.38078500 | 3.34183900  | -1.08681400 |

|   |             |             |             |       |             |             |             |
|---|-------------|-------------|-------------|-------|-------------|-------------|-------------|
| C | -4.87715500 | 0.09039900  | 1.63602600  | H     | -1.20506700 | -0.38647100 | -1.96109800 |
| H | -4.41527700 | 0.58672200  | 2.49220700  |       |             |             |             |
| H | -5.46041400 | -0.74447700 | 2.03527900  | N19_P |             |             |             |
| H | -5.57934700 | 0.77834500  | 1.16777900  | B     | 0.83015200  | -0.54640500 | -0.56330700 |
| C | -3.18201600 | -1.68791300 | 1.41247600  | C     | 0.00423000  | -1.58660100 | 0.42754100  |
| H | -2.24960200 | -2.00339600 | 0.95210100  | C     | 0.38045800  | -2.93268300 | 0.23871100  |
| H | -3.87631200 | -2.53221600 | 1.35790800  | H     | 1.02850900  | -3.16898600 | -0.60246000 |
| H | -2.99325900 | -1.48047400 | 2.46407300  | C     | 0.06504800  | -3.95614300 | 1.11947100  |
| C | 1.98171900  | -0.82649900 | 0.09282100  | H     | 0.41380200  | -4.96625700 | 0.92638000  |
| C | 2.47744500  | -1.73974900 | -0.83577700 | C     | -0.62719500 | -3.66225100 | 2.29250500  |
| F | 1.70433400  | -2.24337100 | -1.81073300 | H     | -0.80448800 | -4.42262100 | 3.04579000  |
| C | 3.79397900  | -2.19420600 | -0.84798800 | C     | -1.10342100 | -2.37353900 | 2.46353200  |
| F | 4.18713400  | -3.07840800 | -1.76286600 | H     | -1.67142900 | -2.13397900 | 3.35977200  |
| C | 4.69719400  | -1.71602700 | 0.08472500  | C     | -0.88077300 | -1.37091800 | 1.50526700  |
| F | 5.95644300  | -2.14187000 | 0.08739000  | C     | -1.64676400 | -0.08968800 | 1.70581900  |
| C | 4.26835500  | -0.77795000 | 1.01335200  | H     | -1.02371800 | 0.78133800  | 1.53812500  |
| F | 5.12288100  | -0.29091100 | 1.91144100  | H     | -2.04838100 | -0.03716500 | 2.71731200  |
| C | 2.95011900  | -0.35014500 | 0.98555500  | N     | -2.85184900 | 0.11453600  | 0.76537900  |
| F | 2.61674200  | 0.58001100  | 1.89133600  | C     | -3.96291200 | -0.98912900 | 0.85331700  |
| C | 0.79107600  | 1.43143300  | -0.23906300 | C     | -5.17476200 | -0.56928500 | 0.00306900  |
| C | 0.85508800  | 2.52888700  | 0.62193800  | H     | -4.89972700 | -0.65742100 | -1.05486900 |
| F | 0.54777300  | 2.41822600  | 1.91822500  | H     | -5.94688400 | -1.32216500 | 0.19002700  |
| C | 1.20682600  | 3.81215300  | 0.21210900  | C     | -5.69197800 | 0.83171600  | 0.26677800  |
| F | 1.22323200  | 4.81636400  | 1.08637100  | H     | -6.03732600 | 0.95087500  | 1.30035400  |
| C | 1.55884200  | 4.04263000  | -1.10783500 | H     | -6.55262700 | 1.03875300  | -0.37534900 |
| F | 1.89924400  | 5.26099000  | -1.51347600 | C     | -4.56405700 | 1.79375400  | -0.04950200 |
| C | 1.56081900  | 2.97803600  | -1.99682400 | H     | -4.87378800 | 2.83670900  | 0.06825200  |
| F | 1.91642200  | 3.16759100  | -3.26596800 | H     | -4.27289300 | 1.66592100  | -1.10088000 |
| C | 1.20710100  | 1.71674100  | -1.54127900 | C     | -3.31727800 | 1.60340300  | 0.82374600  |
| F | 1.26842200  | 0.73535900  | -2.46118700 | C     | -2.22388000 | 2.48576100  | 0.21745400  |
| H | -1.64234200 | -0.19476100 | -0.36543000 | H     | -1.92939000 | 2.12689100  | -0.77202100 |
| C | -1.64550100 | -5.09991500 | -1.26505800 | H     | -1.33290000 | 2.57510800  | 0.83903900  |
| C | -2.17478300 | -4.22141800 | -2.20441000 | H     | -2.63920900 | 3.48964600  | 0.09477100  |
| C | -1.86804900 | -2.86428200 | -2.14068600 | C     | -3.58064600 | 2.04749400  | 2.26337600  |
| C | -1.04310300 | -2.35113100 | -1.13543700 | H     | -2.67229300 | 2.03862500  | 2.86773200  |
| C | -0.50646300 | -3.25065700 | -0.20678900 | H     | -4.34597700 | 1.45954500  | 2.76893000  |
| C | -0.80495900 | -4.60716300 | -0.26992600 | H     | -3.93129800 | 3.08222600  | 2.22530100  |
| H | -1.87923300 | -6.15846600 | -1.31112400 | C     | -4.40370200 | -1.24574200 | 2.29254000  |
| H | -2.82082600 | -4.59025000 | -2.99506900 | H     | -3.57373400 | -1.50638300 | 2.94609000  |
| H | -2.27164400 | -2.18815500 | -2.89229400 | H     | -5.07059100 | -2.11187400 | 2.26657400  |
| H | 0.14050800  | -2.88169000 | 0.58296600  | H     | -4.96200800 | -0.41850900 | 2.73194300  |
| H | -0.37835400 | -5.28343300 | 0.46422800  | C     | -3.42608000 | -2.28078200 | 0.21826700  |
| C | -0.73208200 | -0.87791500 | -1.09987400 | H     | -2.83698300 | -2.06931200 | -0.67662900 |
| H | 0.28957100  | -0.77522600 | -1.48058500 | H     | -4.29078900 | -2.87389900 | -0.09457800 |

|        |             |             |             |   |             |             |             |
|--------|-------------|-------------|-------------|---|-------------|-------------|-------------|
| H      | -2.82304300 | -2.88242900 | 0.89366400  | C | -0.70049800 | -0.23791700 | -3.95088100 |
| C      | 2.46534100  | -0.80839400 | -0.30830900 | H | -0.38299600 | -0.68182100 | -4.88951100 |
| C      | 3.39212200  | -0.31893900 | -1.23125700 | C | -1.95403200 | 0.35115500  | -3.83917300 |
| F      | 2.97472300  | 0.36498000  | -2.31266400 | H | -2.63505600 | 0.37648400  | -4.68361400 |
| C      | 4.76907000  | -0.44768400 | -1.10998300 | C | -2.32435700 | 0.91482500  | -2.62497500 |
| F      | 5.58575500  | 0.03811600  | -2.04778100 | H | -3.30693600 | 1.37172700  | -2.52576500 |
| C      | 5.29432000  | -1.07623800 | 0.00801700  | C | -1.47456000 | 0.89511300  | -1.51218200 |
| F      | 6.61176700  | -1.21534200 | 0.15157500  | C | -2.04906900 | 1.53082500  | -0.25152000 |
| C      | 4.42607200  | -1.54268700 | 0.98057900  | H | -2.78379000 | 2.28280700  | -0.55420700 |
| F      | 4.91561200  | -2.12621300 | 2.07750600  | H | -1.28571600 | 2.05633500  | 0.32700600  |
| C      | 3.05165500  | -1.38894900 | 0.81881400  | N | -2.73372000 | 0.53275700  | 0.65989400  |
| F      | 2.31857400  | -1.83490400 | 1.84840000  | C | -3.20936400 | 1.12898000  | 1.98603600  |
| C      | 0.78528800  | 1.08474400  | -0.21859600 | C | -4.08147500 | 2.35863400  | 1.71189700  |
| C      | 1.12801500  | 1.51173800  | 1.07006100  | H | -4.57432300 | 2.62804600  | 2.65117200  |
| F      | 1.25962200  | 0.60503000  | 2.05351300  | H | -3.43020100 | 3.20197900  | 1.46077800  |
| C      | 1.32679800  | 2.83256000  | 1.44612900  | C | -5.12056700 | 2.13750900  | 0.60066000  |
| F      | 1.63645100  | 3.15118900  | 2.70361400  | C | -5.06010800 | 0.78183800  | -0.06951200 |
| C      | 1.21886700  | 3.83159300  | 0.48647200  | C | -6.20704300 | 0.32408400  | -0.71465700 |
| F      | 1.40516200  | 5.10738400  | 0.81620600  | C | -6.21302600 | -0.90553400 | -1.35277000 |
| C      | 0.90787000  | 3.47318000  | -0.81346200 | H | -7.10713500 | -1.26096900 | -1.85454200 |
| F      | 0.79156000  | 4.41462300  | -1.75111100 | C | -5.06185900 | -1.68011300 | -1.34427200 |
| C      | 0.71482200  | 2.13054400  | -1.13511400 | H | -5.06714300 | -2.63616700 | -1.85417100 |
| F      | 0.39365300  | 1.92209400  | -2.42475800 | C | -3.88963600 | -1.26254500 | -0.70658200 |
| H      | -2.47333800 | -0.00780900 | -0.18969100 | C | -3.90526700 | -0.01800500 | -0.05415600 |
| C      | -3.62106800 | -1.67979400 | -3.32819800 | C | -2.66772700 | -2.16107200 | -0.74686500 |
| C      | -2.72897500 | -2.73779000 | -3.16625100 | H | -1.80164500 | -1.51200700 | -0.86778100 |
| C      | -1.42137300 | -2.49872900 | -2.75275100 | C | -2.63842200 | -3.10225200 | -1.95426600 |
| C      | -0.95251600 | -1.20091600 | -2.49762800 | H | -1.65029900 | -3.56191200 | -2.02238700 |
| C      | -1.86994100 | -0.14746600 | -2.65465400 | H | -2.82528600 | -2.55620100 | -2.88321400 |
| C      | -3.18181100 | -0.38293200 | -3.07024200 | H | -3.37331600 | -3.90902200 | -1.86376100 |
| H      | -4.63635800 | -1.86051900 | -3.66737700 | C | -2.53210400 | -2.96393900 | 0.55155600  |
| H      | -3.05043100 | -3.75490400 | -3.37061300 | H | -1.68925200 | -3.65773300 | 0.47694300  |
| H      | -0.73205900 | -3.33156600 | -2.64267300 | H | -3.44037600 | -3.54904600 | 0.73008500  |
| H      | -1.51496000 | 0.87249900  | -2.54138400 | H | -2.36775300 | -2.32126700 | 1.42300200  |
| H      | -3.85389900 | 0.45692900  | -3.23305600 | C | -2.04269400 | 1.55332600  | 2.87883700  |
| C      | 0.48482000  | -0.95263800 | -2.14006000 | H | -1.39891700 | 2.29930100  | 2.41461300  |
| H      | 1.03869900  | -1.87437400 | -2.35612400 | H | -1.43718200 | 0.70243600  | 3.19936000  |
| H      | 0.88179600  | -0.20669900 | -2.82670100 | H | -2.46772100 | 2.01256600  | 3.77595000  |
|        |             |             |             | C | -3.98485600 | 0.04121200  | 2.74163700  |
| N20_TS |             |             |             | H | -3.38271700 | -0.86994700 | 2.81516600  |
| B      | 0.91011300  | 0.20404300  | -0.40990800 | H | -4.93873000 | -0.21184700 | 2.27717300  |
| C      | -0.19245900 | 0.29339500  | -1.60929400 | H | -4.18119800 | 0.39587400  | 3.75689800  |
| C      | 0.15294900  | -0.25540600 | -2.85326500 | C | 1.98622900  | -1.00908300 | -0.48956400 |
| H      | 1.13166700  | -0.71276300 | -2.96465500 | C | 3.34494200  | -0.90535800 | -0.18675600 |

|       |             |             |             |   |             |             |             |
|-------|-------------|-------------|-------------|---|-------------|-------------|-------------|
| F     | 3.90251900  | 0.26903800  | 0.13113500  | C | -0.85907100 | -0.55106900 | -3.73621500 |
| C     | 4.21808500  | -1.98852900 | -0.17569400 | H | -0.53731000 | -1.01921100 | -4.66208800 |
| F     | 5.50547000  | -1.81145200 | 0.11521400  | C | -2.12525800 | 0.01991900  | -3.64502100 |
| C     | 3.74797100  | -3.25911400 | -0.46336900 | H | -2.80654500 | 0.01010900  | -4.48940400 |
| F     | 4.56896500  | -4.30458300 | -0.45015000 | C | -2.49358600 | 0.61671500  | -2.44909600 |
| C     | 2.40260200  | -3.42481400 | -0.75301700 | H | -3.47864300 | 1.07161900  | -2.35718200 |
| F     | 1.91249100  | -4.63921300 | -1.00295200 | C | -1.62352300 | 0.64077400  | -1.34956900 |
| C     | 1.57451700  | -2.31391200 | -0.76024200 | C | -2.16593600 | 1.29460600  | -0.10367200 |
| F     | 0.26817500  | -2.57312300 | -0.98802200 | H | -2.90383800 | 2.05469500  | -0.36567100 |
| C     | 1.60634300  | 1.68478200  | -0.28558500 | H | -1.38777000 | 1.74019300  | 0.51164900  |
| C     | 1.42362800  | 2.69102500  | 0.64821000  | N | -2.92639700 | 0.29761600  | 0.80152100  |
| F     | 0.60207000  | 2.50698900  | 1.71136500  | C | -3.45553500 | 0.90555200  | 2.12594200  |
| C     | 2.02096200  | 3.94612600  | 0.58637800  | C | -4.37289800 | 2.07136500  | 1.74936000  |
| F     | 1.77962700  | 4.85453600  | 1.53172900  | H | -4.92488500 | 2.33735400  | 2.65508500  |
| C     | 2.86172500  | 4.24281800  | -0.47057400 | H | -3.75650500 | 2.94111300  | 1.50496700  |
| F     | 3.44779800  | 5.43299000  | -0.55572600 | C | -5.35347500 | 1.76795100  | 0.59458400  |
| C     | 3.08433100  | 3.27544000  | -1.44307400 | C | -5.21696100 | 0.39360000  | -0.02274700 |
| F     | 3.89625500  | 3.54015900  | -2.46420200 | C | -6.29789600 | -0.16999100 | -0.69763700 |
| C     | 2.45866000  | 2.04515700  | -1.33373500 | C | -6.18900900 | -1.43124300 | -1.26651700 |
| F     | 2.73663200  | 1.15101300  | -2.29230000 | H | -7.03381200 | -1.86627700 | -1.79017000 |
| H     | -7.09808800 | 0.94619100  | -0.70754800 | C | -4.99868300 | -2.13995600 | -1.16443400 |
| H     | -6.13276600 | 2.27106500  | 0.99244200  | H | -4.92266800 | -3.11886600 | -1.62311000 |
| H     | -5.00145200 | 2.90912100  | -0.17013600 | C | -3.88460600 | -1.61871600 | -0.50109500 |
| H     | -1.54460900 | -0.17290400 | 1.04488800  | C | -4.03744000 | -0.34618200 | 0.06476100  |
| C     | 1.83775800  | -2.18987600 | 4.39896000  | C | -2.59106300 | -2.41464000 | -0.42374700 |
| C     | 1.72684800  | -0.80448400 | 4.32621600  | H | -1.75442600 | -1.71356300 | -0.47238500 |
| C     | 1.07253700  | -0.20338100 | 3.25484600  | C | -2.40230700 | -3.35143500 | -1.61949500 |
| C     | 0.50743400  | -0.97962400 | 2.23519500  | H | -1.38412800 | -3.74275500 | -1.60579600 |
| C     | 0.63218800  | -2.37303600 | 2.31654700  | H | -2.54767100 | -2.81382900 | -2.56041200 |
| C     | 1.28915500  | -2.97169800 | 3.38567700  | H | -3.08995400 | -4.20297900 | -1.58284900 |
| H     | 2.35142900  | -2.65631800 | 5.23302800  | C | -2.48903600 | -3.19913600 | 0.89088200  |
| H     | 2.15881700  | -0.18275900 | 5.10431900  | H | -1.53956100 | -3.74092900 | 0.91864600  |
| H     | 1.00815800  | 0.87849500  | 3.20105100  | H | -3.30872600 | -3.91975500 | 0.97672200  |
| H     | 0.21540500  | -2.98846000 | 1.52367000  | H | -2.52473100 | -2.55021000 | 1.77391200  |
| H     | 1.37517700  | -4.05322900 | 3.42448100  | C | -2.30984800 | 1.40166000  | 3.00424300  |
| C     | -0.17393700 | -0.36813900 | 1.07144300  | H | -1.68343500 | 2.15017100  | 2.51901900  |
| H     | -0.23427900 | 0.71166700  | 1.03418000  | H | -1.67708400 | 0.58057400  | 3.35162200  |
| H     | -0.49114900 | -1.04693600 | 0.29183900  | H | -2.75943900 | 1.87003400  | 3.88430300  |
|       |             |             |             | C | -4.20727200 | -0.19193600 | 2.88574100  |
| N20_P |             |             |             | H | -3.56539100 | -1.06252600 | 3.05257300  |
| B     | 0.81554700  | 0.15159800  | -0.21482900 | H | -5.11759300 | -0.51880900 | 2.38257600  |
| C     | -0.32813100 | 0.07573700  | -1.41469300 | H | -4.47934200 | 0.20632500  | 3.86631600  |
| C     | 0.00578400  | -0.51107000 | -2.64890400 | C | 2.02347200  | -0.94147000 | -0.47940200 |
| H     | 0.99478200  | -0.94165200 | -2.76612100 | C | 3.38992200  | -0.70219100 | -0.36377200 |

|        |             |             |             |   |             |             |             |
|--------|-------------|-------------|-------------|---|-------------|-------------|-------------|
| F      | 3.86018600  | 0.53557500  | -0.15531900 | C | 0.90827000  | -2.59874200 | -3.56978500 |
| C      | 4.35909900  | -1.69873800 | -0.42316800 | H | 1.58645300  | -3.32386400 | -4.00828600 |
| F      | 5.65208200  | -1.39250300 | -0.30880000 | C | -0.34777300 | -2.38776500 | -4.11708700 |
| C      | 3.97914700  | -3.02035100 | -0.59067900 | H | -0.67893600 | -2.94724500 | -4.98598500 |
| F      | 4.89257300  | -3.98895400 | -0.64852700 | C | -1.17911700 | -1.43852000 | -3.53215500 |
| C      | 2.62938600  | -3.32029600 | -0.68849800 | H | -2.16720300 | -1.25948500 | -3.94815700 |
| F      | 2.23067500  | -4.58913000 | -0.82204000 | C | -0.76950200 | -0.70491200 | -2.42071500 |
| C      | 1.70553400  | -2.28887800 | -0.62230400 | C | -1.71468800 | 0.35139000  | -1.92352500 |
| F      | 0.40580600  | -2.67548200 | -0.64469000 | H | -2.65935800 | 0.29109000  | -2.47250800 |
| C      | 1.34733300  | 1.72073200  | -0.32254000 | H | -1.29496800 | 1.34326200  | -2.09671800 |
| C      | 1.04163700  | 2.78376400  | 0.51545800  | N | -2.01106100 | 0.25240400  | -0.46448700 |
| F      | 0.29966600  | 2.60341000  | 1.64321500  | C | -2.55611100 | 1.55063200  | 0.02777600  |
| C      | 1.42974600  | 4.10349300  | 0.30272500  | C | -3.97632700 | 1.77438800  | -0.46035700 |
| F      | 1.08429200  | 5.05918500  | 1.17020800  | H | -4.03670100 | 1.73369400  | -1.55484700 |
| C      | 2.16566200  | 4.41871100  | -0.82447200 | H | -4.30613600 | 2.77492200  | -0.16436000 |
| F      | 2.54692800  | 5.67333400  | -1.05816200 | C | -4.89566100 | 0.72261700  | 0.16296600  |
| C      | 2.49538700  | 3.40249800  | -1.71181700 | H | -4.99462800 | 0.97209200  | 1.23053600  |
| F      | 3.19654500  | 3.68756800  | -2.80942000 | C | -4.26658800 | -0.66153600 | 0.09336100  |
| C      | 2.07983700  | 2.10706700  | -1.44962100 | C | -5.02386200 | -1.79770000 | 0.39921900  |
| F      | 2.43426900  | 1.18765000  | -2.35802800 | H | -6.06695000 | -1.67602400 | 0.67431100  |
| H      | -7.22707500 | 0.38842900  | -0.76620100 | C | -4.48111600 | -3.07467100 | 0.37494000  |
| H      | -6.38590000 | 1.88170000  | 0.93521200  | H | -5.10263100 | -3.92914500 | 0.62836600  |
| H      | -5.22033900 | 2.51616600  | -0.19590900 | C | -3.14270300 | -3.27211200 | 0.02821900  |
| H      | -2.23186700 | -0.41800700 | 1.05526400  | C | -2.37063300 | -2.15129000 | -0.25973600 |
| C      | 3.32493900  | -1.36717400 | 4.09875900  | H | -1.31877200 | -2.28045900 | -0.49172400 |
| C      | 3.02396300  | -0.02900200 | 3.86075200  | C | -2.91543400 | -0.86641600 | -0.21066100 |
| C      | 2.01062200  | 0.31931600  | 2.97206500  | C | -6.28204700 | 0.78027800  | -0.48252500 |
| C      | 1.27337400  | -0.66292900 | 2.30127200  | H | -6.66031500 | 1.80653600  | -0.46034800 |
| C      | 1.57944900  | -2.00389200 | 2.56165800  | H | -7.01071600 | 0.15080400  | 0.03180800  |
| C      | 2.59479200  | -2.35609800 | 3.44486000  | H | -6.23095200 | 0.45616100  | -1.52662600 |
| H      | 4.12088800  | -1.63679700 | 4.78544300  | C | -2.53750700 | -4.64981200 | -0.03514300 |
| H      | 3.58482100  | 0.75174100  | 4.36579000  | H | -2.98003800 | -5.31150200 | 0.71343500  |
| H      | 1.78619700  | 1.36576900  | 2.79335800  | H | -1.45818800 | -4.61091200 | 0.13065200  |
| H      | 1.01807200  | -2.78118000 | 2.04628200  | H | -2.70532800 | -5.10183700 | -1.01809200 |
| H      | 2.81649500  | -3.40444700 | 3.62126700  | C | 1.19814000  | 1.47811700  | -0.61136400 |
| C      | 0.22619600  | -0.30066700 | 1.27900700  | C | 0.96282400  | 2.23941400  | -1.75761900 |
| H      | -0.40174700 | 0.47861700  | 1.70489300  | F | 0.69652000  | 1.66418100  | -2.93840000 |
| H      | -0.39349000 | -1.19839200 | 1.12222400  | C | 0.97544200  | 3.63219500  | -1.78098700 |
|        |             |             |             | F | 0.70656200  | 4.28645500  | -2.91002300 |
| N21_TS |             |             |             | C | 1.28532200  | 4.33615100  | -0.62987100 |
| B      | 1.09936800  | -0.13725100 | -0.53800600 | F | 1.30068400  | 5.66412000  | -0.63125500 |
| C      | 0.49057000  | -0.92076400 | -1.81821800 | C | 1.60291700  | 3.62822200  | 0.52129700  |
| C      | 1.30246900  | -1.88148400 | -2.44255200 | F | 1.93667800  | 4.27558900  | 1.63625400  |
| H      | 2.29508600  | -2.07335000 | -2.05128600 | C | 1.58683000  | 2.24388200  | 0.49198900  |

|       |             |             |             |   |             |             |             |
|-------|-------------|-------------|-------------|---|-------------|-------------|-------------|
| F     | 2.00688400  | 1.64546000  | 1.61745000  | H | -1.66725200 | 1.37413500  | -1.73875200 |
| C     | 2.40595800  | -0.89596000 | 0.05810500  | N | -2.58079900 | 0.45594000  | -0.07510000 |
| C     | 3.66401700  | -0.31400300 | 0.19832900  | C | -2.89359600 | 1.82898300  | 0.44540100  |
| F     | 3.88655700  | 0.95278800  | -0.17227700 | C | -4.25499100 | 2.26913800  | -0.05188300 |
| C     | 4.77106500  | -0.98804000 | 0.70609300  | H | -4.25809300 | 2.29429900  | -1.14788400 |
| F     | 5.94550900  | -0.36998500 | 0.81326600  | H | -4.43118300 | 3.29646100  | 0.27833800  |
| C     | 4.64945400  | -2.31187900 | 1.09194400  | C | -5.37301700 | 1.35720500  | 0.45919600  |
| F     | 5.69483000  | -2.97262600 | 1.57733600  | H | -5.57592500 | 1.63336400  | 1.50347400  |
| C     | 3.42199100  | -2.94685600 | 0.95474700  | C | -4.94761100 | -0.10351300 | 0.47256900  |
| F     | 3.29392000  | -4.22666400 | 1.30101400  | C | -5.87553000 | -1.10601300 | 0.76977600  |
| C     | 2.34610200  | -2.23955300 | 0.44259500  | H | -6.90576000 | -0.82654300 | 0.96568900  |
| F     | 1.20491500  | -2.93685700 | 0.30272300  | C | -5.51637300 | -2.44612800 | 0.83048800  |
| H     | -0.88708000 | -0.01409200 | 0.19404800  | H | -6.27192400 | -3.19248000 | 1.05771900  |
| H     | -1.85803000 | 2.32824400  | -0.29653400 | C | -4.19858400 | -2.84862000 | 0.61035900  |
| H     | -2.55648200 | 1.52877900  | 1.11684300  | C | -3.25385500 | -1.86376900 | 0.33150600  |
| C     | -2.90479700 | 1.32620900  | 4.04455800  | H | -2.21933000 | -2.14312300 | 0.15592200  |
| C     | -1.72975000 | 2.00115700  | 3.71874000  | C | -3.63297400 | -0.52753300 | 0.26215600  |
| C     | -0.79108800 | 1.41770200  | 2.87353400  | C | -6.64831900 | 1.59264800  | -0.35534600 |
| C     | -1.00502900 | 0.14419800  | 2.32208400  | H | -6.89193800 | 2.65873700  | -0.36891500 |
| C     | -2.16151800 | -0.54656300 | 2.71187500  | H | -7.50797100 | 1.06237200  | 0.05760400  |
| C     | -3.10477400 | 0.03905600  | 3.55205300  | H | -6.50730300 | 1.25903300  | -1.38787100 |
| H     | -3.64004900 | 1.78618900  | 4.69698900  | C | -3.77856000 | -4.29275900 | 0.66925500  |
| H     | -1.54138200 | 2.99033700  | 4.12505600  | H | -3.22127900 | -4.56592800 | -0.23100700 |
| H     | 0.11869200  | 1.95846800  | 2.64121400  | H | -4.64281800 | -4.95369100 | 0.75652100  |
| H     | -2.33247200 | -1.55298600 | 2.34093500  | H | -3.12388400 | -4.47158200 | 1.52727600  |
| H     | -3.99682500 | -0.51871300 | 3.82237400  | C | 0.34716300  | 1.16432500  | 0.05152500  |
| C     | -0.04588000 | -0.46219400 | 1.32585900  | C | 0.46244500  | 2.06412600  | -1.01104100 |
| H     | 0.94703500  | -0.22709600 | 1.68966700  | F | 0.58864400  | 1.58973400  | -2.26009000 |
| H     | -0.15686300 | -1.54560500 | 1.32798800  | C | 0.42360500  | 3.44567500  | -0.88030800 |
|       |             |             |             | F | 0.51836900  | 4.24169800  | -1.94457800 |
| N21_P |             |             |             | C | 0.29494200  | 4.00044500  | 0.38884000  |
| B     | 0.62349400  | -0.45962900 | -0.23412400 | F | 0.26121700  | 5.32092800  | 0.54428700  |
| C     | -0.29742400 | -1.16001200 | -1.43067400 | C | 0.19479000  | 3.15852800  | 1.48435800  |
| C     | 0.15463600  | -2.43592600 | -1.82698500 | F | 0.05572500  | 3.67323300  | 2.70626800  |
| H     | 1.09758400  | -2.79183100 | -1.41592900 | C | 0.22419900  | 1.77780500  | 1.29535600  |
| C     | -0.52560200 | -3.26098600 | -2.70816600 | F | 0.08045600  | 1.04998100  | 2.41292900  |
| H     | -0.10869400 | -4.22733100 | -2.97488600 | C | 2.22929700  | -0.39752500 | -0.63276900 |
| C     | -1.74355800 | -2.84739700 | -3.24687800 | C | 2.80291800  | -0.62372400 | -1.88404600 |
| H     | -2.29346100 | -3.47825700 | -3.93716700 | F | 2.05994600  | -0.94438100 | -2.95280900 |
| C     | -2.24480400 | -1.61569900 | -2.86561700 | C | 4.16887300  | -0.52207000 | -2.13741000 |
| H     | -3.20870300 | -1.28574700 | -3.24625600 | F | 4.64909300  | -0.77866000 | -3.35645000 |
| C     | -1.54120100 | -0.78616000 | -1.97729200 | C | 5.03038700  | -0.12972100 | -1.12790000 |
| C     | -2.25371000 | 0.47185700  | -1.57081700 | F | 6.33815600  | -0.02210100 | -1.35707200 |
| H     | -3.21191600 | 0.56348800  | -2.08408300 | C | 4.50648900  | 0.17353400  | 0.12016900  |

|       |             |             |             |      |             |             |             |
|-------|-------------|-------------|-------------|------|-------------|-------------|-------------|
| F     | 5.31259200  | 0.59713000  | 1.09444700  | C    | -3.70400100 | -1.08149900 | 0.07586700  |
| C     | 3.13997200  | 0.05723100  | 0.32753500  | C    | -4.97000700 | -1.29860100 | 0.61108400  |
| F     | 2.70235200  | 0.45334400  | 1.53225000  | C    | -5.51028200 | -0.39532000 | 1.52323100  |
| H     | -1.70606000 | 0.15210000  | 0.37749600  | C    | -4.78169400 | 0.72928200  | 1.90373400  |
| H     | -2.09181700 | 2.48329200  | 0.10068500  | C    | -3.51618800 | 0.95393000  | 1.37262600  |
| H     | -2.85741400 | 1.76689900  | 1.53733800  | H    | -3.28257400 | -1.78879900 | -0.63265800 |
| C     | 3.34991700  | -2.54166200 | 3.96445600  | H    | -5.53531800 | -2.17612500 | 0.31465300  |
| C     | 3.44242800  | -2.94839900 | 2.63579800  | H    | -6.49763600 | -0.56792500 | 1.93911800  |
| C     | 2.45322600  | -2.59158700 | 1.72566800  | H    | -5.19836500 | 1.43408700  | 2.61575200  |
| C     | 1.35662300  | -1.80990000 | 2.11072700  | H    | -2.95068100 | 1.83366900  | 1.66743300  |
| C     | 1.26772700  | -1.43036500 | 3.45268600  | C    | -0.22699900 | -1.77652800 | -1.63440800 |
| C     | 2.25263400  | -1.78766700 | 4.36906000  | C    | -0.09311400 | -2.54415200 | -2.78822400 |
| H     | 4.12105600  | -2.81585400 | 4.67712000  | C    | -0.78473000 | -2.19644300 | -3.94558300 |
| H     | 4.28631500  | -3.54750900 | 2.30703000  | C    | -1.61706800 | -1.07794600 | -3.95972800 |
| H     | 2.53385500  | -2.91538600 | 0.69010400  | C    | -1.76022500 | -0.30796300 | -2.81158200 |
| H     | 0.41829700  | -0.83993600 | 3.78165400  | H    | 0.32402400  | -2.03117800 | -0.73168900 |
| H     | 2.16183100  | -1.47334100 | 5.40459500  | H    | 0.55569600  | -3.41385300 | -2.78033100 |
| C     | 0.29955300  | -1.45625600 | 1.09281000  | H    | -0.67411000 | -2.79652200 | -4.84340900 |
| H     | -0.01529300 | -2.41502100 | 0.66289500  | H    | -2.15044100 | -0.80571300 | -4.86448300 |
| H     | -0.58443200 | -1.09085200 | 1.63958500  | H    | -2.40513100 | 0.56695900  | -2.81757800 |
|       |             |             |             | H    | -2.90368600 | 2.67643000  | -1.06103900 |
| P1_TS |             |             |             | H    | -2.29130400 | 5.08517100  | -1.08114900 |
| P     | -1.26821700 | 0.28949700  | -0.12315300 | H    | -0.04776900 | 5.79047900  | -0.29771300 |
| C     | -0.97360200 | 2.05598600  | -0.31446200 | H    | 1.60055100  | 4.10304800  | 0.46517400  |
| C     | 0.30631100  | 2.42628100  | 0.13971400  | H    | -0.09518700 | 0.18795900  | 0.93191600  |
| B     | 1.42990700  | 1.35588900  | 0.54732200  | C    | 0.58243900  | -4.06993000 | 1.47798000  |
| C     | -1.91300200 | 2.99593200  | -0.74638700 | C    | -0.54324400 | -3.35156300 | 1.86950800  |
| C     | -1.57420500 | 4.34333000  | -0.74434600 | C    | -0.44579200 | -1.98681900 | 2.13237100  |
| C     | -0.30962900 | 4.73655500  | -0.30301500 | C    | 0.77566200  | -1.30497500 | 2.01087700  |
| C     | 0.61602800  | 3.79200300  | 0.12910000  | C    | 1.90272800  | -2.04848000 | 1.63090800  |
| O     | 2.66665400  | 1.93600500  | 1.01109800  | C    | 1.80745500  | -3.41110200 | 1.36914800  |
| O     | 1.76203200  | 0.36917500  | -0.46642700 | H    | 0.51060300  | -5.13254900 | 1.26939300  |
| C     | 3.11208700  | 0.22249600  | -0.40266500 | H    | -1.50256700 | -3.85018900 | 1.97290500  |
| C     | 3.90841300  | -0.68525300 | -1.07174200 | H    | -1.33195800 | -1.43698900 | 2.44503700  |
| C     | 5.28660100  | -0.64103600 | -0.81489500 | H    | 2.86164100  | -1.54632300 | 1.53132200  |
| C     | 5.82489600  | 0.28022100  | 0.07808200  | H    | 2.69672100  | -3.96142200 | 1.07610900  |
| C     | 5.00863700  | 1.19900700  | 0.75381600  | C    | 0.83868600  | 0.18233900  | 2.11771900  |
| C     | 3.65382500  | 1.15328400  | 0.49341800  | H    | 0.06771200  | 0.58812000  | 2.78333900  |
| H     | 3.47167500  | -1.40267000 | -1.75779700 | H    | 1.80947600  | 0.49289500  | 2.50841500  |
| H     | 5.94259100  | -1.34117300 | -1.32170400 |      |             |             |             |
| H     | 6.89449400  | 0.28907000  | 0.25924700  | P1_P |             |             |             |
| H     | 5.41357000  | 1.92134300  | 1.45353500  | P    | 2.16022800  | -0.11589200 | -0.39653700 |
| C     | -1.06597100 | -0.65813900 | -1.64988300 | C    | 1.50705400  | 1.48891100  | 0.06567300  |
| C     | -2.97364700 | 0.05157800  | 0.44932000  | C    | 0.12426900  | 1.75277600  | -0.00261300 |

|   |             |             |             |      |             |             |             |
|---|-------------|-------------|-------------|------|-------------|-------------|-------------|
| B | -1.14747400 | 0.73631600  | -0.34202300 | C    | -4.78111300 | -2.32373100 | -1.96485400 |
| C | 2.45773600  | 2.43843000  | 0.48595000  | C    | -3.96880700 | -2.72962600 | -0.90982100 |
| C | 2.03691900  | 3.70312500  | 0.85849000  | C    | -2.70710400 | -2.16794500 | -0.74182300 |
| C | 0.67739100  | 4.00908900  | 0.79659700  | C    | -2.23053400 | -1.19035400 | -1.62073000 |
| C | -0.24158300 | 3.05778200  | 0.37513500  | C    | -3.05931700 | -0.78717800 | -2.67158400 |
| O | -2.26621100 | 1.57734100  | -0.85727800 | C    | -4.32048000 | -1.34783500 | -2.84478200 |
| O | -1.65006700 | 0.21465500  | 0.98461500  | H    | -5.76722200 | -2.75835500 | -2.09561500 |
| C | -2.93183300 | 0.63387500  | 1.10174400  | H    | -4.32257500 | -3.48105300 | -0.20996800 |
| C | -3.82457300 | 0.36537200  | 2.11923300  | H    | -2.08355200 | -2.46521500 | 0.09836300  |
| C | -5.11771000 | 0.90750700  | 2.01966800  | H    | -2.71341800 | -0.00700300 | -3.34434100 |
| C | -5.48211900 | 1.68664700  | 0.93081100  | H    | -4.94916300 | -1.01714200 | -3.66638400 |
| C | -4.56924500 | 1.95894600  | -0.10223800 | C    | -0.90400600 | -0.52493600 | -1.37386500 |
| C | -3.29932800 | 1.42753700  | 0.00079700  | H    | -0.22958800 | -1.28621700 | -0.96071900 |
| H | -3.52850200 | -0.25014500 | 2.96235900  | H    | -0.48137300 | -0.17592000 | -2.32740100 |
| H | -5.83947000 | 0.70859900  | 2.80568400  |      |             |             |             |
| H | -6.48739600 | 2.09167200  | 0.87053500  | P5_P |             |             |             |
| H | -4.84171900 | 2.56047100  | -0.96262100 | P    | -1.93986600 | 0.63631100  | 0.23459200  |
| C | 1.82849600  | -1.42918600 | 0.79079800  | B    | 1.47418100  | 0.46982300  | -0.06866900 |
| C | 3.94265600  | -0.03554100 | -0.66950600 | C    | -0.67135700 | 1.51937900  | 1.21523600  |
| C | 4.84131100  | -0.27037900 | 0.37575800  | C    | 0.76279600  | 0.98325700  | 1.32550400  |
| C | 6.20742100  | -0.13871600 | 0.14939100  | C    | -3.39014800 | 1.73079400  | 0.17350900  |
| C | 6.67433000  | 0.22267600  | -1.11255000 | C    | -5.42309000 | 2.58275400  | 1.14672700  |
| C | 5.77932100  | 0.45502200  | -2.15408700 | C    | -5.60893000 | 3.44642800  | 0.07081300  |
| C | 4.41185600  | 0.32748300  | -1.93525300 | C    | -4.66084800 | 3.44170500  | -0.95119800 |
| H | 4.47385300  | -0.55960800 | 1.35638900  | C    | -3.54685300 | 2.60527600  | -0.92515300 |
| H | 6.90770600  | -0.32037500 | 0.95754800  | C    | -2.45833700 | -1.08145200 | 0.51689800  |
| H | 7.74095200  | 0.32165100  | -1.28556000 | C    | -2.17101700 | -1.82151800 | 1.67631800  |
| H | 6.14456300  | 0.73370000  | -3.13654600 | C    | -2.60751500 | -3.14717800 | 1.74545100  |
| H | 3.71267800  | 0.51182600  | -2.74664600 | C    | -3.29904000 | -3.75753500 | 0.70641500  |
| C | 2.52414200  | -2.64126400 | 0.68508500  | C    | -3.58556500 | -2.99781000 | -0.42879800 |
| C | 2.23439600  | -3.67231000 | 1.56804700  | C    | -3.17859700 | -1.67407100 | -0.55276100 |
| C | 1.25222800  | -3.49682300 | 2.54401400  | C    | 3.06646300  | 0.09530400  | 0.14715300  |
| C | 0.56119800  | -2.29371500 | 2.63972900  | C    | 3.82906500  | 0.29637900  | 1.29250500  |
| C | 0.84620000  | -1.24668000 | 1.76609200  | C    | 5.18919000  | 0.01310400  | 1.37344900  |
| H | 3.28758900  | -2.77569000 | -0.07654500 | C    | 5.84744000  | -0.51280400 | 0.27376200  |
| H | 2.76824600  | -4.61354800 | 1.49278200  | C    | 5.13083700  | -0.75180400 | -0.89033200 |
| H | 1.02386700  | -4.30801200 | 3.22788800  | C    | 3.77553300  | -0.45313600 | -0.92190600 |
| H | -0.21251400 | -2.16146600 | 3.38795400  | C    | 0.77688900  | -0.97793500 | -0.50786100 |
| H | 0.27466400  | -0.32524900 | 1.82418700  | C    | 0.86782500  | -2.05441300 | 0.37658100  |
| H | 3.51562400  | 2.19547200  | 0.51135500  | C    | 0.27263000  | -3.29160900 | 0.17304200  |
| H | 2.76005400  | 4.44330900  | 1.18431000  | C    | -0.42616200 | -3.52104700 | -1.00118500 |
| H | 0.33530700  | 5.00052600  | 1.07888200  | C    | -0.50714800 | -2.50791100 | -1.94155500 |
| H | -1.29444600 | 3.31561200  | 0.32267500  | C    | 0.08429200  | -1.27805700 | -1.67640100 |
| H | 1.65497100  | -0.49075900 | -1.64492700 | C    | -6.78285300 | 4.38749200  | 0.02509300  |



|   |             |             |             |       |             |             |             |
|---|-------------|-------------|-------------|-------|-------------|-------------|-------------|
| C | -2.56704200 | 2.67711800  | -2.07313100 | C     | 1.69786700  | 5.25827900  | -0.01539100 |
| C | -1.37023200 | -1.31697100 | 2.85003100  | C     | 1.16239600  | 4.05583400  | -0.47157000 |
| C | -3.66856300 | -5.21328900 | 0.77168400  | C     | 1.97033100  | 2.95900000  | -0.79695300 |
| C | -3.47598100 | -0.95592600 | -1.84814800 | C     | 3.35769000  | 3.13488300  | -0.67609200 |
| F | 3.28290400  | 0.79527300  | 2.41408200  | C     | 3.90059500  | 4.33276700  | -0.22453800 |
| F | 5.86498500  | 0.23894800  | 2.50251800  | H     | 3.49952800  | 6.33433400  | 0.47215000  |
| F | 7.14943300  | -0.79174600 | 0.33402700  | H     | 1.03716400  | 6.08605100  | 0.22513100  |
| F | 5.74646600  | -1.26925500 | -1.95574400 | H     | 0.08418500  | 3.98092600  | -0.60473400 |
| F | 3.14424000  | -0.71195700 | -2.08273300 | H     | 4.02094500  | 2.32022000  | -0.95073900 |
| F | 1.52717500  | -1.91955100 | 1.54320900  | H     | 4.97868400  | 4.43361400  | -0.14334700 |
| F | 0.31469300  | -4.23622900 | 1.11539700  | C     | 1.37758900  | 1.64505000  | -1.23760900 |
| F | -1.05856400 | -4.67919100 | -1.19990300 | H     | 0.33599400  | 1.82572600  | -1.53788100 |
| F | -1.23219600 | -2.69408400 | -3.04985300 | H     | 1.88203400  | 1.29695900  | -2.14502300 |
| F | -0.14575800 | -0.32428000 | -2.60827400 |       |             |             |             |
| H | -1.13451700 | 1.75214900  | 2.18154800  | P6_TS |             |             |             |
| H | -0.66625800 | 2.46764200  | 0.65922800  | P     | 1.97149600  | -0.60159100 | 0.38721800  |
| H | 0.81027900  | 0.22260800  | 2.10811600  | C     | 1.48567400  | -0.69804100 | 2.16172700  |
| H | 1.33122700  | 1.83805600  | 1.70861100  | H     | 2.34749700  | -0.94712600 | 2.78470900  |
| H | -6.14935600 | 2.57702200  | 1.95560700  | H     | 1.07059800  | 0.25184900  | 2.49940200  |
| H | -4.78860600 | 4.11382700  | -1.79595100 | C     | 0.39520000  | -1.76899100 | 2.22950800  |
| H | -4.11639500 | -3.45938500 | -1.25719200 | H     | 0.68931000  | -2.61966700 | 1.59551300  |
| H | -7.13954400 | 4.52364200  | -0.99834900 | H     | 0.36237000  | -2.17365300 | 3.24734600  |
| H | -7.61067500 | 4.01883900  | 0.63413100  | C     | -0.99577800 | -1.23663400 | 1.86205200  |
| H | -6.49841200 | 5.37229800  | 0.40921600  | H     | -1.33853400 | -0.63448000 | 2.70712700  |
| H | -2.51132000 | 1.73521600  | -2.63014600 | H     | -1.66578400 | -2.10041700 | 1.85617100  |
| H | -1.55245600 | 2.91649100  | -1.73906900 | B     | -1.31223200 | -0.39083800 | 0.49966800  |
| H | -2.86955600 | 3.45573400  | -2.77444500 | C     | 2.63602300  | 1.04835200  | -0.09818200 |
| H | -0.36595100 | -1.75142400 | 2.82229900  | C     | 2.81222400  | 2.15772000  | 0.75943500  |
| H | -1.25405700 | -0.23600600 | 2.87618400  | C     | 2.70167900  | 2.14637900  | 2.26999800  |
| H | -1.84382400 | -1.62843700 | 3.78463300  | H     | 3.30200100  | 2.96383200  | 2.67548500  |
| H | -4.57663900 | -5.42054500 | 0.20144100  | H     | 3.06149800  | 1.22304700  | 2.71747800  |
| H | -3.81864300 | -5.54163000 | 1.80217100  | H     | 1.67492500  | 2.30773100  | 2.61352700  |
| H | -2.85803600 | -5.80951100 | 0.34119700  | C     | 3.12978500  | 3.39618300  | 0.19218600  |
| H | -4.07340600 | -1.59684500 | -2.49736600 | H     | 3.23808900  | 4.25196800  | 0.85567500  |
| H | -4.03264600 | -0.02725200 | -1.68861700 | C     | 3.27179900  | 3.58418100  | -1.17700100 |
| H | -2.55561900 | -0.71991400 | -2.39475800 | C     | 3.46961500  | 4.95805200  | -1.75505700 |
| C | -4.32929700 | 1.72163500  | 1.22291200  | H     | 2.49179100  | 5.40940900  | -1.95284200 |
| C | -4.21411500 | 0.81255600  | 2.42232100  | H     | 4.01985800  | 4.92128800  | -2.69797700 |
| H | -4.48033200 | -0.21822300 | 2.16949600  | H     | 4.00564400  | 5.61083600  | -1.06225800 |
| H | -3.20158700 | 0.79623100  | 2.83623900  | C     | 3.16044200  | 2.46503200  | -1.99801500 |
| H | -4.88271500 | 1.15222700  | 3.21496800  | H     | 3.29039800  | 2.57781300  | -3.07155700 |
| H | -2.36576600 | -3.72261300 | 2.63584100  | C     | 2.84641800  | 1.20912000  | -1.48957800 |
| H | -1.45276700 | 0.63488100  | -1.07024000 | C     | 2.72174000  | 0.06102300  | -2.46108600 |
| C | 3.07421200  | 5.40079900  | 0.11844000  | H     | 1.70488600  | -0.34443600 | -2.45337900 |

|   |             |             |             |      |             |             |             |
|---|-------------|-------------|-------------|------|-------------|-------------|-------------|
| H | 3.41975100  | -0.74878700 | -2.22618900 | H    | 0.31015700  | -1.03573400 | -0.31154700 |
| H | 2.92779400  | 0.40201500  | -3.47708400 | C    | -3.43983700 | -4.93527000 | -0.93931500 |
| C | 3.36548200  | -1.82390200 | 0.23713700  | C    | -2.30972000 | -4.89248300 | -0.13012200 |
| C | 4.60780900  | -1.62091900 | 0.88364900  | C    | -1.49041500 | -3.76592100 | -0.12353400 |
| C | 4.93641500  | -0.42032500 | 1.73523600  | C    | -1.77818800 | -2.66020100 | -0.92808300 |
| H | 5.99406800  | -0.43440600 | 2.00408100  | C    | -2.91870000 | -2.72066900 | -1.73854100 |
| H | 4.36949400  | -0.42181800 | 2.67044700  | C    | -3.74245100 | -3.84072700 | -1.74490700 |
| H | 4.73346400  | 0.51870900  | 1.21814700  | H    | -4.08035600 | -5.81103400 | -0.93983800 |
| C | 5.61477000  | -2.57936600 | 0.74717200  | H    | -2.06357500 | -5.73577500 | 0.50744000  |
| H | 6.56335000  | -2.40824500 | 1.25035200  | H    | -0.62808400 | -3.75002700 | 0.53479100  |
| C | 5.44947800  | -3.73597700 | -0.00417800 | H    | -3.15932400 | -1.87070900 | -2.37268100 |
| C | 6.55933300  | -4.74207900 | -0.15326800 | H    | -4.62190200 | -3.85670500 | -2.38087700 |
| H | 7.04703800  | -4.63632400 | -1.12762400 | C    | -0.92849900 | -1.40961100 | -0.99557100 |
| H | 6.17570900  | -5.76336100 | -0.08753000 | H    | -0.01737400 | -1.69635400 | -1.54481700 |
| H | 7.32107100  | -4.60997500 | 0.61786200  | H    | -1.35621100 | -0.71277200 | -1.71025100 |
| C | 4.22627600  | -3.92035400 | -0.63956000 |      |             |             |             |
| H | 4.06791600  | -4.81478800 | -1.23747200 | P6_P |             |             |             |
| C | 3.19064100  | -2.99225800 | -0.53965600 | P    | -2.20681900 | 0.54990600  | 0.44022900  |
| C | 1.92947400  | -3.29643500 | -1.30749400 | C    | -1.21309200 | 0.90996700  | 1.92059200  |
| H | 1.75919200  | -2.55606700 | -2.09587400 | H    | -1.91286500 | 1.22406100  | 2.69986200  |
| H | 1.04648200  | -3.32074600 | -0.66679700 | H    | -0.72538400 | -0.00851700 | 2.24828500  |
| H | 2.00473600  | -4.27285100 | -1.78898300 | C    | -0.13815400 | 1.98716300  | 1.63517500  |
| C | -0.68070500 | 1.13831400  | 0.33537200  | H    | -0.38369900 | 2.55523300  | 0.72849600  |
| C | -0.28684800 | 1.74264200  | -0.86312600 | H    | -0.19045700 | 2.71404500  | 2.45235600  |
| F | -0.12586600 | 1.02151600  | -1.98831000 | C    | 1.26647700  | 1.37604300  | 1.54464100  |
| C | 0.02255500  | 3.08726100  | -1.00237700 | H    | 1.41609500  | 0.77556200  | 2.44765500  |
| F | 0.38734800  | 3.58627100  | -2.18513800 | H    | 1.97736200  | 2.20514100  | 1.63148900  |
| C | 0.00755300  | 3.91157300  | 0.10997300  | B    | 1.66255700  | 0.56880100  | 0.17063000  |
| F | 0.39373300  | 5.18190800  | 0.00879800  | C    | -2.85727800 | -1.13507200 | 0.25832400  |
| C | -0.34796400 | 3.37007900  | 1.33189400  | C    | -2.91280000 | -2.07806200 | 1.30890300  |
| F | -0.30093700 | 4.11826200  | 2.43661100  | C    | -2.46619700 | -1.83208000 | 2.73094200  |
| C | -0.68688900 | 2.02396100  | 1.41272900  | H    | -2.94114400 | -2.56092000 | 3.38977600  |
| F | -0.99254000 | 1.59621700  | 2.65149400  | H    | -2.72340800 | -0.83986800 | 3.10054800  |
| C | -2.95428100 | -0.17412700 | 0.32718800  | H    | -1.38362000 | -1.96818400 | 2.82949200  |
| C | -3.92843700 | -0.55151200 | 1.25654700  | C    | -3.37056500 | -3.36319500 | 1.01804500  |
| F | -3.62367300 | -1.14766100 | 2.41718500  | H    | -3.40103600 | -4.09327500 | 1.82257300  |
| C | -5.29497300 | -0.34546900 | 1.08145700  | C    | -3.76041100 | -3.74866800 | -0.26124400 |
| F | -6.15426700 | -0.73986800 | 2.02088400  | C    | -4.17321700 | -5.16476700 | -0.54824300 |
| C | -5.76501500 | 0.27225300  | -0.06299800 | H    | -3.28859700 | -5.75014500 | -0.81688700 |
| F | -7.06759300 | 0.47136700  | -0.24280600 | H    | -4.87615800 | -5.21388800 | -1.38238000 |
| C | -4.84722600 | 0.68007600  | -1.01716800 | H    | -4.63270800 | -5.63105400 | 0.32575700  |
| F | -5.26266900 | 1.27797800  | -2.13435700 | C    | -3.70313700 | -2.79937000 | -1.27818800 |
| C | -3.49529200 | 0.46186100  | -0.79546600 | H    | -3.99177400 | -3.08008100 | -2.28732800 |
| F | -2.69511800 | 0.89168400  | -1.79218900 | C    | -3.25910100 | -1.50039700 | -1.04914500 |

|   |             |             |             |       |             |             |             |
|---|-------------|-------------|-------------|-------|-------------|-------------|-------------|
| C | -3.16546200 | -0.56618300 | -2.23000600 | C     | 3.71077100  | -0.75823700 | -0.84624400 |
| H | -2.11949600 | -0.37286000 | -2.49498700 | F     | 2.93649200  | -0.98757600 | -1.92580900 |
| H | -3.66469500 | 0.38962000  | -2.04460500 | C     | 3.94293300  | 5.19421000  | -0.38232300 |
| H | -3.63566700 | -1.02164400 | -3.10218300 | C     | 2.55896000  | 5.22367200  | -0.24438600 |
| C | -3.48470200 | 1.82340300  | 0.22122400  | C     | 1.80706400  | 4.07899700  | -0.49549900 |
| C | -4.62257900 | 1.82166800  | 1.05607900  | C     | 2.40459300  | 2.87427100  | -0.88541200 |
| C | -4.83544100 | 0.80880100  | 2.15399500  | C     | 3.79974500  | 2.87038100  | -1.02907400 |
| H | -5.80871200 | 0.96108500  | 2.62254100  | C     | 4.55803000  | 4.00965800  | -0.78067000 |
| H | -4.08222200 | 0.90673500  | 2.94263100  | H     | 4.53449500  | 6.08319300  | -0.18866500 |
| H | -4.80100600 | -0.21772000 | 1.77933500  | H     | 2.06076800  | 6.14113700  | 0.05557500  |
| C | -5.59164400 | 2.80545800  | 0.87223500  | H     | 0.72458800  | 4.12519900  | -0.39156900 |
| H | -6.46594700 | 2.80421300  | 1.51786900  | H     | 4.29461000  | 1.95694200  | -1.34811400 |
| C | -5.47086000 | 3.78496900  | -0.10960700 | H     | 5.63649800  | 3.97247700  | -0.90240600 |
| C | -6.54301400 | 4.82153000  | -0.31105200 | C     | 1.59914200  | 1.62405100  | -1.11490700 |
| H | -7.19331900 | 4.54129400  | -1.14578200 | H     | 0.55944600  | 1.91281500  | -1.32669800 |
| H | -6.10853000 | 5.79606500  | -0.54530100 | H     | 1.95608900  | 1.13142900  | -2.02276700 |
| H | -7.16703600 | 4.92543400  | 0.57862300  | H     | -1.34190300 | 0.73248500  | -0.63967200 |
| C | -4.33706300 | 3.76870400  | -0.91893800 |       |             |             |             |
| H | -4.22425500 | 4.53108500  | -1.68534500 | P7_TS |             |             |             |
| C | -3.33323400 | 2.81110000  | -0.78102300 | P     | 2.02255900  | -0.50410600 | 0.10600900  |
| C | -2.14214800 | 2.90852200  | -1.70628600 | B     | -1.11901500 | 0.25830200  | 0.23486000  |
| H | -1.95859700 | 1.98793300  | -2.26839100 | C     | 1.41351500  | -0.56250100 | 3.12311500  |
| H | -1.22268700 | 3.14582800  | -1.16407900 | H     | 2.07214000  | -1.35134800 | 3.49568500  |
| H | -2.30336300 | 3.70593700  | -2.43266100 | C     | 1.02329800  | -0.68980900 | 1.63713400  |
| C | 0.74246500  | -0.81987500 | -0.10043500 | H     | 0.52081800  | -1.64748300 | 1.50724800  |
| C | 0.20944500  | -1.21784500 | -1.32678200 | C     | -0.03462400 | 0.44322500  | 1.46927600  |
| F | 0.16567900  | -0.36322900 | -2.37035800 | H     | 0.53489600  | 1.33975200  | 1.18734400  |
| C | -0.35962900 | -2.46057400 | -1.57948300 | C     | -0.46383500 | 0.69962200  | 2.95347300  |
| F | -0.89908300 | -2.73176500 | -2.77246300 | H     | -1.50542100 | 0.99508000  | 3.08411700  |
| C | -0.43542400 | -3.39693500 | -0.56226200 | C     | 0.56576600  | 1.70169100  | 3.50835800  |
| F | -1.00540900 | -4.58548900 | -0.77069300 | H     | 0.31305700  | 1.99167600  | 4.53326300  |
| C | 0.03881200  | -3.05115200 | 0.69241000  | H     | 0.62296300  | 2.61408800  | 2.90693500  |
| F | -0.11398900 | -3.89776300 | 1.71623200  | C     | 1.88795200  | 0.87044100  | 3.47350100  |
| C | 0.60736400  | -1.79767000 | 0.88662000  | H     | 2.60847100  | 1.26211100  | 2.75132700  |
| F | 1.01898800  | -1.54961800 | 2.14746000  | H     | 2.37975700  | 0.86955200  | 4.45018800  |
| C | 3.20448200  | -0.04082200 | 0.24042500  | C     | -0.01319400 | -0.56361000 | 3.71391900  |
| C | 4.11855500  | 0.12201500  | 1.27851000  | H     | -0.01805500 | -0.41071300 | 4.79812800  |
| F | 3.79675900  | 0.78389300  | 2.40089400  | H     | -0.57455100 | -1.46685000 | 3.47638100  |
| C | 5.42287100  | -0.36558300 | 1.24654500  | C     | 3.48431800  | 0.57651100  | 0.41233400  |
| F | 6.24668600  | -0.16615800 | 2.27829200  | C     | 4.60651400  | 0.08283500  | 1.11392200  |
| C | 5.87038700  | -1.06352000 | 0.13800400  | C     | 5.69359900  | 0.92850200  | 1.33669900  |
| F | 7.11515900  | -1.53827900 | 0.09133200  | H     | 6.55230100  | 0.53959800  | 1.87886300  |
| C | 5.00091500  | -1.26356400 | -0.92445800 | C     | 5.71160700  | 2.24670500  | 0.89325400  |
| F | 5.41101500  | -1.93795200 | -2.00173500 | C     | 4.59990200  | 2.71450100  | 0.19886100  |

|   |             |             |             |      |             |             |             |
|---|-------------|-------------|-------------|------|-------------|-------------|-------------|
| H | 4.59273600  | 3.73995600  | -0.16304900 | C    | -2.65522100 | -1.52445200 | 1.43012500  |
| C | 3.48872500  | 1.91045000  | -0.05228300 | C    | -1.18082200 | 1.69646800  | -0.54467900 |
| C | 4.69497200  | -1.32128500 | 1.65324800  | F    | -2.26942400 | 2.57853800  | 1.35512000  |
| H | 5.54622800  | -1.41005800 | 2.33074100  | C    | -1.70412600 | 2.78484300  | 0.15614900  |
| H | 4.81566000  | -2.05664500 | 0.85264300  | F    | -2.21295900 | 5.07797800  | 0.42495700  |
| H | 3.79568700  | -1.58789000 | 2.21235200  | C    | -1.68758000 | 4.09268900  | -0.30038000 |
| C | 6.88363700  | 3.14993000  | 1.17098900  | F    | -1.06123700 | 5.62433300  | -1.98528100 |
| H | 7.13372900  | 3.75127000  | 0.29320100  | C    | -1.10184000 | 4.37555800  | -1.52861400 |
| H | 7.76732600  | 2.57666700  | 1.45876700  | F    | 0.05792400  | 3.58471700  | -3.42105300 |
| H | 6.65204500  | 3.84157400  | 1.98728500  | C    | -0.55355600 | 3.33891300  | -2.26127300 |
| C | 2.33867200  | 2.52448600  | -0.80730500 | F    | 0.02819800  | 1.12181200  | -2.52402500 |
| H | 2.63576400  | 3.48458700  | -1.23531900 | C    | -0.59891700 | 2.04358500  | -1.75479100 |
| H | 1.48168400  | 2.70933500  | -0.15066900 | H    | 0.39230800  | -0.30305000 | -0.65091300 |
| H | 1.99504900  | 1.88413500  | -1.62265900 | C    | -4.52494600 | -1.83414500 | -2.92160700 |
| C | 2.64233700  | -2.06470500 | -0.64258500 | C    | -3.99316700 | -2.73772900 | -2.00435600 |
| C | 3.14814200  | -1.91082300 | -1.95543000 | C    | -2.74171600 | -2.50687000 | -1.44507300 |
| C | 3.61958500  | -3.02681800 | -2.64624900 | C    | -2.00177000 | -1.36398400 | -1.77168100 |
| H | 4.01382900  | -2.89091900 | -3.65037500 | C    | -2.52552300 | -0.48813400 | -2.72408700 |
| C | 3.58808200  | -4.30158100 | -2.09332700 | C    | -3.77845200 | -0.71927700 | -3.28695500 |
| C | 3.05080800  | -4.44108400 | -0.81610900 | H    | -5.50562500 | -2.00335600 | -3.35389000 |
| H | 2.99775900  | -5.43293600 | -0.37215800 | H    | -4.55364300 | -3.62303800 | -1.72000500 |
| C | 2.57170800  | -3.35828200 | -0.07845500 | H    | -2.33802500 | -3.21030500 | -0.72073800 |
| C | 3.18026400  | -0.57611400 | -2.66259900 | H    | -1.95869800 | 0.37804400  | -3.03669900 |
| H | 3.84334900  | 0.13856800  | -2.16473700 | H    | -4.17187000 | -0.01604200 | -4.01410300 |
| H | 2.18320200  | -0.12251400 | -2.70563200 | C    | -0.66792100 | -1.14641800 | -1.07055100 |
| H | 3.53229800  | -0.70223100 | -3.68791800 | H    | -0.45612000 | -2.02108900 | -0.44858700 |
| C | 4.11950600  | -5.49629900 | -2.83971900 | H    | 0.07505000  | -1.16893700 | -1.88223500 |
| H | 3.43096800  | -6.34242000 | -2.76869300 |      |             |             |             |
| H | 5.07917800  | -5.81896800 | -2.42326300 | P7_P |             |             |             |
| H | 4.27351600  | -5.26758600 | -3.89628400 | P    | -2.26630100 | -0.51368000 | -0.20009700 |
| C | 1.98113700  | -3.67177400 | 1.27575200  | B    | 1.23635800  | 0.29495800  | -0.13878500 |
| H | 2.31157200  | -4.65890000 | 1.60481300  | C    | -1.47102000 | -0.08265300 | -3.01635200 |
| H | 0.88589000  | -3.69245000 | 1.23789000  | H    | -2.08666600 | -0.83922400 | -3.51255500 |
| H | 2.26774600  | -2.95077800 | 2.04118500  | C    | -1.05449000 | -0.43733600 | -1.57129400 |
| C | -2.55987300 | -0.33270600 | 0.71700600  | H    | -0.57259600 | -1.41416500 | -1.56281700 |
| F | -3.89020200 | 1.32358400  | -0.36668300 | C    | -0.00007300 | 0.66217300  | -1.21822600 |
| C | -3.79754100 | 0.22068700  | 0.38511400  | H    | -0.55764500 | 1.45925800  | -0.70929200 |
| F | -6.15929300 | 0.24773400  | 0.40550400  | C    | 0.32638700  | 1.24104000  | -2.63078700 |
| C | -5.01593500 | -0.33775500 | 0.75551800  | H    | 1.34442500  | 1.62376600  | -2.71538600 |
| F | -6.20127200 | -2.06567200 | 1.83822800  | C    | -0.77327600 | 2.26187200  | -2.96889100 |
| C | -5.04336800 | -1.51529800 | 1.48512300  | H    | -0.55766200 | 2.77767200  | -3.91013300 |
| F | -3.83708000 | -3.28415200 | 2.47373900  | H    | -0.88558100 | 3.02397400  | -2.19125800 |
| C | -3.84356500 | -2.12077200 | 1.82134700  | C    | -2.03676200 | 1.35587300  | -3.11060200 |
| F | -1.54438900 | -2.25619500 | 1.68377100  | H    | -2.79341700 | 1.56989100  | -2.35215900 |

|   |             |             |             |       |             |             |             |
|---|-------------|-------------|-------------|-------|-------------|-------------|-------------|
| H | -2.51745100 | 1.49520000  | -4.08294100 | C     | 2.63442300  | -0.24325300 | -0.83116000 |
| C | -0.05914000 | 0.11391400  | -3.60767600 | F     | 4.09125800  | 1.09328600  | 0.49615100  |
| H | -0.09793400 | 0.46008100  | -4.64570500 | C     | 3.91503600  | 0.13822400  | -0.42701500 |
| H | 0.56192400  | -0.77752000 | -3.54634500 | F     | 6.27539200  | -0.02210000 | -0.47034100 |
| C | -3.84299800 | 0.37369200  | -0.40262200 | C     | 5.08475300  | -0.45244700 | -0.89003000 |
| C | -4.90393700 | -0.20955800 | -1.12039400 | F     | 6.12729800  | -2.09250500 | -2.23516300 |
| C | -6.10617500 | 0.48731700  | -1.22908700 | C     | 5.01651800  | -1.51284600 | -1.78036600 |
| H | -6.92346100 | 0.03457500  | -1.78436300 | F     | 3.66846900  | -3.02317000 | -2.99346400 |
| C | -6.28263200 | 1.74188000  | -0.65458800 | C     | 3.77101100  | -1.97275900 | -2.17286700 |
| C | -5.21154300 | 2.30667800  | 0.03766600  | F     | 1.46544400  | -1.94574000 | -2.02243000 |
| H | -5.32994300 | 3.29354000  | 0.47821700  | C     | 2.63645300  | -1.34440400 | -1.67855200 |
| C | -3.98693000 | 1.65851700  | 0.17903200  | C     | 1.39294600  | 1.78333100  | 0.58568200  |
| C | -4.78224800 | -1.54591700 | -1.80544400 | F     | 2.82557100  | 2.62164800  | -1.11678900 |
| H | -5.70878900 | -1.79099400 | -2.32686600 | C     | 2.08181700  | 2.83667300  | -0.01885400 |
| H | -4.56908400 | -2.35217100 | -1.09782500 | F     | 2.73166100  | 5.10307100  | -0.21896000 |
| H | -3.98361900 | -1.52879600 | -2.55422700 | C     | 2.03253700  | 4.15733900  | 0.40952200  |
| C | -7.58718200 | 2.48251200  | -0.77407300 | F     | 1.13485700  | 5.76785900  | 1.89032300  |
| H | -7.43230200 | 3.47477600  | -1.20678000 | C     | 1.21984800  | 4.50262300  | 1.47982000  |
| H | -8.04316400 | 2.62278300  | 0.21045800  | F     | -0.35603100 | 3.81102400  | 3.09598800  |
| H | -8.29599500 | 1.94113500  | -1.40322400 | C     | 0.48038400  | 3.50851600  | 2.09710300  |
| C | -2.88269900 | 2.39025100  | 0.90945200  | F     | -0.22923900 | 1.32288400  | 2.28833600  |
| H | -3.24244000 | 3.36628600  | 1.23804100  | C     | 0.58676400  | 2.20021300  | 1.64041700  |
| H | -2.01559000 | 2.56364500  | 0.26267100  | H     | -1.64825400 | 0.21234200  | 0.81421400  |
| H | -2.52387300 | 1.86067400  | 1.79696800  | C     | 4.27032300  | -2.04902300 | 3.31141000  |
| C | -2.49686800 | -2.14754100 | 0.56644300  | C     | 3.90985300  | -2.82273800 | 2.21144700  |
| C | -2.84480700 | -2.13466900 | 1.93898000  | C     | 2.78946900  | -2.48563000 | 1.45803700  |
| C | -2.99984100 | -3.34798500 | 2.60156300  | C     | 2.00885300  | -1.36823000 | 1.77519100  |
| H | -3.27001700 | -3.33683900 | 3.65444700  | C     | 2.37835200  | -0.60772100 | 2.89022500  |
| C | -2.81132600 | -4.56969500 | 1.95856700  | C     | 3.49481900  | -0.94309100 | 3.65020300  |
| C | -2.46600100 | -4.55467100 | 0.61176400  | H     | 5.14566400  | -2.30611200 | 3.89923400  |
| H | -2.31649100 | -5.49872000 | 0.09360500  | H     | 4.50257100  | -3.69064400 | 1.93762200  |
| C | -2.29387800 | -3.36973600 | -0.10556200 | H     | 2.51455800  | -3.09167100 | 0.59703400  |
| C | -3.02913200 | -0.86233300 | 2.73137200  | H     | 1.77719100  | 0.25562400  | 3.16191800  |
| H | -3.74260800 | -0.17784500 | 2.26144200  | H     | 3.76371500  | -0.33458800 | 4.50852000  |
| H | -2.07731600 | -0.33144500 | 2.85839200  | C     | 0.85210800  | -0.95234300 | 0.90421100  |
| H | -3.40539200 | -1.09626600 | 3.72806000  | H     | 0.56499700  | -1.81861400 | 0.28919400  |
| C | -2.94969900 | -5.86520100 | 2.71124500  | H     | 0.00156900  | -0.74037200 | 1.55887800  |
| H | -2.02069800 | -6.09552100 | 3.24243300  |       |             |             |             |
| H | -3.16271900 | -6.69641400 | 2.03595700  | P8_TS |             |             |             |
| H | -3.74880500 | -5.80697100 | 3.45394200  | C     | -1.05606600 | -1.19167900 | -1.02078000 |
| C | -1.87303400 | -3.50817700 | -1.55001300 | H     | -1.37787400 | -0.60174600 | -1.88376000 |
| H | -2.22618500 | -4.46295700 | -1.94483500 | H     | -0.67295400 | -2.14000100 | -1.40055300 |
| H | -0.78054900 | -3.49990600 | -1.63732400 | P     | -2.44550200 | -1.45600700 | 0.15815200  |
| H | -2.26153300 | -2.71947400 | -2.19406600 | B     | 0.02716500  | -0.31153800 | -0.14508400 |

|   |             |             |             |      |             |             |             |
|---|-------------|-------------|-------------|------|-------------|-------------|-------------|
| C | -4.00727100 | -0.65221300 | -0.56102900 | F    | -0.79955400 | 3.92849800  | -2.54668900 |
| C | -3.90090100 | 0.86384300  | -0.34367000 | F    | -2.07208200 | 5.08973100  | -0.43375100 |
| H | -3.06284900 | 1.29584600  | -0.89741400 | F    | -2.36208500 | 3.68342200  | 1.89005300  |
| H | -4.81934600 | 1.33312600  | -0.71433500 | F    | -1.45195600 | 1.22733000  | 2.10723400  |
| H | -3.79105200 | 1.11752800  | 0.71522100  | H    | -1.13509000 | -0.84339700 | 1.19137400  |
| C | -5.25951800 | -1.14661900 | 0.17344900  | C    | 3.90058500  | 0.74252900  | 2.97981000  |
| H | -6.10939900 | -0.52637700 | -0.13156200 | C    | 3.84052000  | -0.58235300 | 2.55348300  |
| H | -5.50472400 | -2.18046400 | -0.08017300 | C    | 2.62770700  | -1.12757700 | 2.15153000  |
| H | -5.15927500 | -1.06322600 | 1.26017400  | C    | 1.45307300  | -0.36430900 | 2.15198400  |
| C | -4.16066900 | -0.90797000 | -2.06655600 | C    | 1.51682300  | 0.94896400  | 2.61850900  |
| H | -4.21009100 | -1.96844200 | -2.31751600 | C    | 2.73327500  | 1.49649700  | 3.02235600  |
| H | -5.09317100 | -0.44031900 | -2.40439300 | H    | 4.84626500  | 1.17815300  | 3.28502000  |
| H | -3.34560300 | -0.45848500 | -2.63836400 | H    | 4.73862400  | -1.19177500 | 2.52958100  |
| C | -2.69527700 | -3.32054800 | 0.36729300  | H    | 2.58891900  | -2.15810300 | 1.80644600  |
| C | -1.33308000 | -3.94587700 | 0.71005900  | H    | 0.62002700  | 1.55155100  | 2.67491500  |
| H | -0.56003000 | -3.73945000 | -0.03214100 | H    | 2.76347600  | 2.52487300  | 3.36816600  |
| H | -0.97764800 | -3.61006900 | 1.68810100  | C    | 0.18476500  | -1.02575300 | 1.63004100  |
| H | -1.46089300 | -5.03239600 | 0.76697000  | H    | 0.40753500  | -2.06506200 | 1.38280900  |
| C | -3.61580600 | -3.60384400 | 1.56649100  | H    | -0.48543500 | -1.06834400 | 2.50638000  |
| H | -3.28334400 | -3.06278700 | 2.45832400  |      |             |             |             |
| H | -4.65845700 | -3.34998500 | 1.37974800  | P8_P |             |             |             |
| H | -3.57478000 | -4.67539400 | 1.79271500  | C    | -0.99916400 | -1.26151900 | -0.67120800 |
| C | -3.23753500 | -3.99225500 | -0.89756400 | H    | -1.17215500 | -0.78488200 | -1.64204100 |
| H | -3.23209300 | -5.07960800 | -0.75909200 | H    | -0.68239100 | -2.28652700 | -0.87012900 |
| H | -4.26741100 | -3.69625300 | -1.11083100 | P    | -2.58629400 | -1.37101900 | 0.16066000  |
| H | -2.61921600 | -3.76341400 | -1.77172600 | B    | 0.17669900  | -0.33928800 | 0.13302500  |
| C | 1.56756200  | -0.46029100 | -0.64089500 | C    | -3.97814300 | -0.74970800 | -0.91159900 |
| C | 2.11182600  | -1.70617700 | -0.93981000 | C    | -3.78566200 | 0.77280700  | -1.02009800 |
| C | 2.48571200  | 0.58995400  | -0.69767200 | H    | -2.81184300 | 1.04216300  | -1.43976400 |
| C | 3.43956000  | -1.91864900 | -1.28489600 | H    | -4.55954900 | 1.17043300  | -1.68458400 |
| C | 3.82202700  | 0.42665400  | -1.03800600 | H    | -3.88979000 | 1.26326400  | -0.04716900 |
| C | 4.30530300  | -0.83801100 | -1.33705300 | C    | -5.34631800 | -1.02712500 | -0.27778400 |
| F | 1.36548900  | -2.82625700 | -0.82836100 | H    | -6.10875900 | -0.50203300 | -0.86219000 |
| F | 3.88530300  | -3.14833600 | -1.54374400 | H    | -5.59938100 | -2.09004500 | -0.28816200 |
| F | 4.64466800  | 1.47302700  | -1.07085600 | H    | -5.40615200 | -0.65756800 | 0.75076800  |
| F | 2.12772200  | 1.84048200  | -0.38358000 | C    | -3.90779500 | -1.37370500 | -2.31219100 |
| F | 5.58300500  | -1.01218400 | -1.66106900 | H    | -4.03952200 | -2.45773800 | -2.29615600 |
| C | -0.52074400 | 1.22447500  | -0.08888100 | H    | -4.71510800 | -0.94894800 | -2.91741800 |
| C | -1.19391700 | 1.86233700  | 0.94294500  | H    | -2.96457100 | -1.14725400 | -2.81449900 |
| C | -0.43287300 | 1.97851000  | -1.26060900 | C    | -2.84952800 | -3.05924500 | 0.90112300  |
| C | -1.70533600 | 3.15356500  | 0.85825500  | C    | -1.52530500 | -3.49827200 | 1.54886400  |
| C | -0.93158900 | 3.26360500  | -1.40096400 | H    | -0.69760400 | -3.55299200 | 0.83798700  |
| C | -1.57693700 | 3.86097600  | -0.32374500 | H    | -1.23309800 | -2.82892400 | 2.36132900  |
| F | 0.17007700  | 1.44929900  | -2.33538900 | H    | -1.67624100 | -4.49703500 | 1.97147300  |

|   |             |             |             |       |             |             |             |
|---|-------------|-------------|-------------|-------|-------------|-------------|-------------|
| C | -3.92138900 | -3.00866500 | 2.00025800  | H     | -2.61496600 | -0.50172500 | 1.26469500  |
| H | -3.67232300 | -2.27021600 | 2.76842800  |       |             |             |             |
| H | -4.91891400 | -2.79244700 | 1.61736500  | P9_TS |             |             |             |
| H | -3.95941600 | -3.98897400 | 2.48608100  | C     | 1.03010800  | -0.85834300 | 1.12068200  |
| C | -3.23769600 | -4.06034100 | -0.19449900 | H     | 1.01328900  | -1.94630900 | 1.24171100  |
| H | -3.25258100 | -5.06440000 | 0.24102700  | H     | 1.32579700  | -0.43204200 | 2.08393400  |
| H | -4.23255300 | -3.86218800 | -0.60217800 | B     | -0.41451900 | -0.22772700 | 0.62684700  |
| H | -2.51453900 | -4.06754500 | -1.01649600 | C     | -1.68352600 | -0.91965600 | 1.33463900  |
| C | 1.62206100  | -0.63099200 | -0.59716300 | C     | -2.83038700 | -0.19172800 | 1.68433500  |
| C | 2.06762200  | -1.92644800 | -0.84548300 | C     | -1.72046700 | -2.30173700 | 1.57500500  |
| C | 2.59912900  | 0.34422300  | -0.79374300 | C     | -3.95239300 | -0.80494800 | 2.23703700  |
| C | 3.34091500  | -2.24733600 | -1.30044000 | C     | -2.83788900 | -2.93162000 | 2.11583900  |
| C | 3.88402200  | 0.07687000  | -1.24787800 | C     | -3.96267800 | -2.18016400 | 2.45056400  |
| C | 4.26005600  | -1.23210300 | -1.50860500 | P     | 2.17827100  | -0.42255900 | -0.23335200 |
| F | 1.26933600  | -2.99597700 | -0.60221100 | C     | 3.02502700  | -2.02102500 | -0.77826400 |
| F | 3.68498000  | -3.51807800 | -1.52315900 | C     | 4.03072400  | -1.74071200 | -1.90239900 |
| F | 4.76480400  | 1.06263400  | -1.41772700 | H     | 4.90270500  | -1.18030000 | -1.55829800 |
| F | 2.34397200  | 1.62854600  | -0.51165000 | H     | 4.39172600  | -2.69398100 | -2.30511100 |
| F | 5.48801400  | -1.51100400 | -1.94225300 | H     | 3.56666600  | -1.18542400 | -2.72439600 |
| C | -0.39004700 | 1.19966400  | -0.08706100 | C     | 3.69551100  | -2.78673900 | 0.37034400  |
| C | -1.19001800 | 1.89759100  | 0.81034000  | H     | 4.57087900  | -2.27468100 | 0.76862800  |
| C | -0.24981700 | 1.84634600  | -1.31910800 | H     | 2.99717000  | -2.96563400 | 1.19337800  |
| C | -1.75333000 | 3.14641500  | 0.56072300  | H     | 4.02503400  | -3.76403600 | -0.00187500 |
| C | -0.78581200 | 3.09015900  | -1.62013400 | C     | 1.92062300  | -2.92313100 | -1.35745100 |
| C | -1.54793300 | 3.75267000  | -0.66551800 | H     | 1.14270400  | -3.15017300 | -0.62210700 |
| F | 0.41424600  | 1.24468700  | -2.31797400 | H     | 1.44424900  | -2.47709400 | -2.23437100 |
| F | -0.59613800 | 3.64659300  | -2.81568800 | H     | 2.36977800  | -3.87331600 | -1.66735000 |
| F | -2.08746000 | 4.93847500  | -0.93616400 | C     | 3.45030000  | 0.88862000  | 0.26128200  |
| F | -2.53089100 | 3.73098400  | 1.47442800  | C     | 3.83319000  | 1.65486200  | -1.01442500 |
| F | -1.54010000 | 1.36259700  | 2.00491300  | H     | 4.55871200  | 2.43616400  | -0.76030300 |
| C | 3.74345100  | 1.46051400  | 3.41532600  | H     | 4.28653900  | 1.01137400  | -1.77322800 |
| C | 3.95257500  | 0.22434900  | 2.81025300  | H     | 2.95267700  | 2.13776100  | -1.44919200 |
| C | 2.87828800  | -0.48926900 | 2.28896700  | C     | 4.69946400  | 0.29873500  | 0.92704700  |
| C | 1.57061200  | 0.01082600  | 2.34614700  | H     | 5.27679100  | -0.34633200 | 0.26257800  |
| C | 1.37808600  | 1.24900800  | 2.96921800  | H     | 5.35291000  | 1.12687700  | 1.22509400  |
| C | 2.44929300  | 1.96465400  | 3.49723200  | H     | 4.44558000  | -0.26360700 | 1.83094000  |
| H | 4.57868400  | 2.02095400  | 3.82272600  | C     | 2.83645700  | 1.89017600  | 1.25068300  |
| H | 4.95472900  | -0.18865600 | 2.74497700  | H     | 1.99051500  | 2.43178400  | 0.82925200  |
| H | 3.05419200  | -1.45555500 | 1.82062300  | H     | 2.51669600  | 1.41299800  | 2.18051700  |
| H | 0.37491300  | 1.65192000  | 3.05361200  | H     | 3.61327500  | 2.62144900  | 1.50348400  |
| H | 2.26887200  | 2.92280700  | 3.97541600  | H     | -2.85478100 | 0.87736200  | 1.49297700  |
| C | 0.43287500  | -0.75535500 | 1.71149700  | H     | -4.82549100 | -0.20984600 | 2.48831600  |
| H | 0.70256000  | -1.81884000 | 1.71923700  | H     | -4.83770000 | -2.66387800 | 2.87422100  |
| H | -0.46463300 | -0.64653300 | 2.33277300  | H     | -2.83305100 | -4.00571700 | 2.27750800  |

|      |             |             |             |   |             |             |             |
|------|-------------|-------------|-------------|---|-------------|-------------|-------------|
| H    | -0.86128200 | -2.91660700 | 1.31077000  | H | -4.12165900 | -0.95482000 | 2.54529900  |
| H    | 0.67104300  | -0.23417200 | -1.00496800 | C | -3.48203800 | -2.99498600 | -0.20675300 |
| C    | -0.39081800 | 1.38027500  | 0.68583400  | H | -4.28596200 | -2.62635700 | -0.84618700 |
| C    | -0.18716600 | 2.23361700  | -0.40493000 | H | -2.62255200 | -3.23725000 | -0.83688100 |
| C    | -0.48568600 | 1.99295000  | 1.94805500  | H | -3.82571600 | -3.92557800 | 0.25681500  |
| C    | -0.08490800 | 3.61742600  | -0.25887700 | C | -2.04095900 | -2.64508200 | 1.80854400  |
| H    | -0.09178900 | 1.81101500  | -1.39957800 | H | -1.12979300 | -2.89212900 | 1.25873300  |
| C    | -0.37814900 | 3.37014600  | 2.11241600  | H | -1.76563600 | -1.99135300 | 2.64145500  |
| H    | -0.64804000 | 1.36799500  | 2.82517200  | H | -2.44707900 | -3.57255500 | 2.22539900  |
| C    | -0.17631700 | 4.19219200  | 1.00427700  | C | -3.54650600 | 0.73963100  | -0.54724300 |
| H    | 0.07006300  | 4.24368600  | -1.13298600 | C | -4.29435000 | 1.48882600  | 0.56600900  |
| H    | -0.45431400 | 3.80534400  | 3.10474100  | H | -4.96945700 | 2.21412300  | 0.10008100  |
| H    | -0.09531700 | 5.26794400  | 1.12663700  | H | -4.89629400 | 0.83505400  | 1.19928900  |
| C    | -4.45855100 | 0.71748200  | -2.71671400 | H | -3.59260000 | 2.04588400  | 1.19478800  |
| C    | -4.42456100 | -0.33061500 | -1.80280600 | C | -4.52239100 | -0.00336100 | -1.46786400 |
| C    | -3.20934800 | -0.81799900 | -1.32996300 | H | -5.20320200 | -0.65652000 | -0.91623800 |
| C    | -1.99551400 | -0.25906100 | -1.74798600 | H | -5.13083900 | 0.73700200  | -1.99689900 |
| C    | -2.04809500 | 0.76779300  | -2.69891300 | H | -3.99635300 | -0.59861800 | -2.22164800 |
| C    | -3.25970500 | 1.25835400  | -3.17263900 | C | -2.76801800 | 1.77941700  | -1.36743600 |
| H    | -5.40671000 | 1.09797000  | -3.08303900 | H | -2.09712200 | 2.37278200  | -0.74340000 |
| H    | -5.34868500 | -0.78069300 | -1.45283700 | H | -2.18146400 | 1.33126200  | -2.17227800 |
| H    | -3.20510700 | -1.64898100 | -0.63166100 | H | -3.50107200 | 2.45519200  | -1.82173500 |
| H    | -1.12233800 | 1.17847700  | -3.09450400 | H | 3.04454500  | 0.95321800  | -0.79508700 |
| H    | -3.26515800 | 2.05894800  | -3.90609100 | H | 4.83280600  | 0.34363800  | -2.36585000 |
| C    | -0.67029100 | -0.80853200 | -1.27317000 | H | 4.52611300  | -1.56051100 | -3.93905400 |
| H    | -0.76372100 | -1.85709700 | -0.97706400 | H | 2.39243900  | -2.83375700 | -3.90329700 |
| H    | -0.06251300 | -0.85990200 | -2.19187900 | H | 0.61372400  | -2.22519200 | -2.34658200 |
| P9_P |             |             |             | C | 0.36480900  | 1.43492200  | -0.16800300 |
| C    | -0.92724100 | -0.85271900 | -0.80691900 | C | -0.07242900 | 2.07001000  | 1.00731500  |
| H    | -0.84335200 | -1.94495700 | -0.81400100 | C | 0.52806900  | 2.27362100  | -1.28590100 |
| H    | -1.15443400 | -0.53253400 | -1.82968300 | C | -0.35480900 | 3.43682200  | 1.06760100  |
| B    | 0.56182200  | -0.18259500 | -0.29715300 | H | -0.18659900 | 1.48540500  | 1.91866600  |
| C    | 1.66555400  | -0.57393700 | -1.42966800 | C | 0.25943800  | 3.63904900  | -1.24416600 |
| C    | 2.88678200  | 0.12381800  | -1.48208500 | H | 0.87979800  | 1.83487800  | -2.21705700 |
| C    | 1.53161900  | -1.64025000 | -2.32960600 | C | -0.19305600 | 4.22956800  | -0.06451800 |
| C    | 3.90377100  | -0.21952600 | -2.36642600 | H | -0.68574000 | 3.88262700  | 2.00196400  |
| C    | 2.54174000  | -1.99896300 | -3.22368900 | H | 0.40185000  | 4.24668700  | -2.13357300 |
| C    | 3.73571800  | -1.28775000 | -3.24610700 | H | -0.40327900 | 5.29410100  | -0.02607800 |
| P    | -2.33815200 | -0.45754500 | 0.21971100  | C | 4.98261500  | -0.02589600 | 2.46597100  |
| C    | -3.11430900 | -2.00713800 | 0.90911500  | C | 4.73704000  | -1.09644100 | 1.60909900  |
| C    | -4.34535000 | -1.69082200 | 1.76642500  | C | 3.43942500  | -1.38416500 | 1.20148700  |
| H    | -5.18633100 | -1.32779900 | 1.17073100  | C | 2.35085400  | -0.61499300 | 1.63391000  |
| H    | -4.66761400 | -2.61142800 | 2.26418500  | C | 2.61587000  | 0.45289400  | 2.49832000  |
|      |             |             |             | C | 3.91375500  | 0.74716800  | 2.90884000  |



|        |             |             |             |   |             |             |             |
|--------|-------------|-------------|-------------|---|-------------|-------------|-------------|
| H      | 5.99474600  | 0.20173300  | 2.78537700  | H | -0.27832800 | 0.32166000  | 0.71079100  |
| H      | 5.56006300  | -1.70817600 | 1.25166000  | C | -3.18228800 | 1.60102400  | 0.11789800  |
| H      | 3.25898500  | -2.20678700 | 0.51356500  | C | -4.30139400 | 1.65927200  | -0.74324700 |
| H      | 1.79390400  | 1.06681700  | 2.85502800  | C | -3.15103000 | 2.41934600  | 1.26947800  |
| H      | 4.08814300  | 1.58361000  | 3.57935800  | C | -5.31121700 | 2.58624600  | -0.47672800 |
| C      | 0.96361300  | -0.91779300 | 1.13651900  | C | -4.18981300 | 3.32144900  | 1.49318400  |
| H      | 0.89296700  | -2.00386000 | 0.97951600  | C | -5.27052600 | 3.43596100  | 0.62318600  |
| H      | 0.24184200  | -0.67686500 | 1.93425800  | C | -2.56275700 | -1.19747900 | -0.56939100 |
| H      | -1.91989500 | 0.20762200  | 1.38282900  | C | -2.43530400 | -1.91949100 | -1.78197500 |
|        |             |             |             | C | -3.30164700 | -1.76128700 | 0.50051100  |
|        |             |             |             | C | -3.03144500 | -3.18118800 | -1.86661500 |
| P10_TS |             |             |             | C | -3.89104700 | -3.01490700 | 0.34473700  |
| B      | 1.45049100  | 0.26568100  | -0.10401500 | C | -3.75917400 | -3.75030600 | -0.82743200 |
| C      | 0.58352800  | 0.65616000  | -1.44171400 | P | -1.79017900 | 0.43385800  | -0.17985600 |
| C      | 1.37119800  | 0.84911700  | -2.59385700 | C | -6.35650800 | 4.44996900  | 0.86580000  |
| H      | 2.41750400  | 0.54916200  | -2.56909000 | H | -6.07817300 | 5.41981700  | 0.44088800  |
| C      | 0.86909200  | 1.44657400  | -3.74024400 | H | -7.29699500 | 4.14268300  | 0.40321600  |
| H      | 1.50996100  | 1.57307400  | -4.60736800 | H | -6.52863800 | 4.59658400  | 1.93472600  |
| C      | -0.43907700 | 1.93829900  | -3.76035900 | C | -2.05686600 | 2.34110700  | 2.30551200  |
| H      | -0.81347600 | 2.47123400  | -4.62812200 | H | -1.86459500 | 1.30769900  | 2.61247300  |
| C      | -1.25696900 | 1.72290000  | -2.66450600 | H | -1.12145300 | 2.76199900  | 1.93369900  |
| H      | -2.27937200 | 2.08841100  | -2.66784100 | H | -2.34494500 | 2.90465500  | 3.19507100  |
| C      | -0.77119900 | 1.02599000  | -1.54930300 | C | -4.52767700 | 0.72845900  | -1.91089300 |
| C      | 2.22117300  | -1.16579700 | -0.15744800 | H | -4.94696600 | -0.22332500 | -1.56739700 |
| C      | 1.82407400  | -2.23166400 | -0.95749500 | H | -5.23340200 | 1.17705600  | -2.61353200 |
| F      | 0.71627200  | -2.13977300 | -1.71120700 | H | -3.61360100 | 0.49258000  | -2.45253600 |
| C      | 2.46022000  | -3.46738400 | -0.97982400 | H | -6.16427500 | 2.63171500  | -1.14979100 |
| F      | 2.01295100  | -4.44595900 | -1.76627200 | H | -4.15453700 | 3.94794600  | 2.38119900  |
| C      | 3.55821900  | -3.68129700 | -0.16299100 | H | -4.45563300 | -3.43067500 | 1.17611000  |
| F      | 4.18303600  | -4.85434800 | -0.16665100 | H | -2.92747600 | -3.73503700 | -2.79650200 |
| C      | 3.98577400  | -2.66119300 | 0.67569800  | C | -4.35755200 | -5.12577400 | -0.95948000 |
| F      | 5.03013400  | -2.85466400 | 1.47858700  | H | -5.23354100 | -5.23998700 | -0.31684700 |
| C      | 3.31560300  | -1.44808700 | 0.66138200  | H | -4.65667200 | -5.33000400 | -1.99024600 |
| F      | 3.77396800  | -0.51326700 | 1.51139700  | H | -3.63142100 | -5.89252000 | -0.66989400 |
| C      | 2.43587900  | 1.57516600  | 0.03944300  | C | -3.48792300 | -1.07516900 | 1.83280600  |
| C      | 3.77724400  | 1.62776400  | -0.33186500 | H | -4.13770000 | -0.19801100 | 1.75532000  |
| F      | 4.39937200  | 0.54547400  | -0.82319800 | H | -3.93522000 | -1.76845700 | 2.54739500  |
| C      | 4.54502500  | 2.78534100  | -0.27322100 | H | -2.52933900 | -0.75425100 | 2.25366200  |
| F      | 5.82671500  | 2.76560800  | -0.63521600 | C | -1.76686600 | -1.43281700 | -3.05007900 |
| C      | 3.96718700  | 3.97269900  | 0.14956800  | H | -2.35930200 | -0.65420800 | -3.54076100 |
| F      | 4.68747600  | 5.08896900  | 0.21035200  | H | -0.76879000 | -1.03097700 | -2.89747000 |
| C      | 2.62218900  | 3.98539300  | 0.48783200  | H | -1.68727500 | -2.26669000 | -3.75015600 |
| F      | 2.03703000  | 5.12166500  | 0.86499300  | C | -1.07568200 | -3.22004700 | 3.64176800  |
| C      | 1.89897500  | 2.80433200  | 0.40906000  | C | -0.69409500 | -2.08786300 | 4.35974200  |
| F      | 0.58246000  | 2.89544500  | 0.68578100  |   |             |             |             |

|       |             |             |             |   |             |             |             |
|-------|-------------|-------------|-------------|---|-------------|-------------|-------------|
| C     | -0.10935200 | -1.01126100 | 3.70178400  | C | -2.28447600 | 1.99753100  | 1.54507600  |
| C     | 0.10522200  | -1.04247700 | 2.31837000  | H | -2.84812600 | 1.29937400  | 2.17375200  |
| C     | -0.28420800 | -2.18074500 | 1.61003500  | H | -1.30653600 | 1.54614300  | 1.37009100  |
| C     | -0.86830400 | -3.26224500 | 2.26721100  | H | -2.12997000 | 2.91487000  | 2.11439200  |
| H     | -1.53513500 | -4.06055900 | 4.15186200  | C | -4.20877000 | -1.52447700 | -0.10573200 |
| H     | -0.85456100 | -2.04195000 | 5.43222700  | C | -4.09704700 | -2.89538300 | -0.43281600 |
| H     | 0.18347300  | -0.12723900 | 4.26329500  | C | -5.19882200 | -3.72943600 | -0.24691300 |
| H     | -0.17585200 | -2.21513800 | 0.53100500  | H | -5.09801500 | -4.78226500 | -0.49788100 |
| H     | -1.17892400 | -4.12865400 | 1.69164200  | C | -6.40514100 | -3.26194900 | 0.26081600  |
| C     | 0.71654000  | 0.17216100  | 1.64935300  | C | -6.47332000 | -1.92300100 | 0.63512200  |
| H     | 0.34782500  | 1.09034500  | 2.11784400  | H | -7.38889100 | -1.54849000 | 1.08554000  |
| H     | 1.77898600  | 0.18493000  | 1.91180200  | C | -5.40653800 | -1.03916200 | 0.47784600  |
|       |             |             |             | C | -2.83113600 | -3.54102500 | -0.93673200 |
| P10_P |             |             |             | H | -2.84301500 | -4.60470100 | -0.69054500 |
| P     | -2.80376500 | -0.39982200 | -0.45597600 | H | -2.73029900 | -3.46185000 | -2.02360000 |
| B     | 2.49065900  | -0.72632300 | -0.21705500 | H | -1.94123800 | -3.11204300 | -0.47628600 |
| C     | -1.82108300 | -0.81675000 | -1.95974500 | C | -7.59396400 | -4.17109100 | 0.41286500  |
| H     | -1.66815900 | 0.16852900  | -2.41245200 | H | -7.28525000 | -5.21321300 | 0.51661400  |
| H     | -2.45681800 | -1.39009500 | -2.63852300 | H | -8.19180600 | -3.89754600 | 1.28501600  |
| C     | -0.44829300 | -1.46742800 | -1.69029000 | H | -8.24150900 | -4.10166600 | -0.46707000 |
| H     | -0.47747400 | -2.53001400 | -1.94884500 | C | -5.62154500 | 0.36375700  | 0.99960400  |
| H     | -0.21844100 | -1.41354300 | -0.62670300 | H | -6.49396400 | 0.36853800  | 1.65494100  |
| C     | 0.69939000  | -0.79304500 | -2.44082400 | H | -4.77211400 | 0.72044500  | 1.58410200  |
| H     | 0.69970600  | -1.13759500 | -3.48420500 | H | -5.79750600 | 1.08676400  | 0.19898000  |
| H     | 0.53190100  | 0.28639000  | -2.47842800 | C | 2.21384000  | 0.83970600  | 0.30131900  |
| C     | 2.05690500  | -1.08084200 | -1.79157000 | C | 1.04128100  | 1.56014100  | 0.09731300  |
| H     | 2.25845700  | -2.15969100 | -1.89724900 | F | -0.04589800 | 0.98724000  | -0.49324200 |
| H     | 2.79809700  | -0.59898300 | -2.44057300 | C | 0.82727100  | 2.87599800  | 0.49282100  |
| C     | -3.34930500 | 1.31032600  | -0.68397800 | F | -0.32268900 | 3.50352600  | 0.19964600  |
| C     | -4.09833700 | 1.63281900  | -1.83385200 | C | 1.79891400  | 3.53540300  | 1.22303700  |
| C     | -4.47814600 | 2.95891500  | -2.02762300 | F | 1.61024500  | 4.79108500  | 1.62980800  |
| H     | -5.06613900 | 3.21134100  | -2.90660000 | C | 2.96502500  | 2.85266600  | 1.52829400  |
| C     | -4.12330400 | 3.96547400  | -1.13115500 | F | 3.90941000  | 3.45269500  | 2.25336000  |
| C     | -3.39557000 | 3.61337300  | 0.00320100  | C | 3.13863800  | 1.54798700  | 1.07873500  |
| H     | -3.11935900 | 4.38350600  | 0.71835900  | C | 4.14090500  | -0.96703400 | -0.35878200 |
| C     | -3.00452000 | 2.30076300  | 0.25761000  | C | 4.91205400  | -0.03500100 | -1.05726500 |
| C     | -4.52618000 | 0.61135200  | -2.86315500 | F | 4.33625900  | 1.09385500  | -1.51598500 |
| H     | -3.73868200 | 0.44037700  | -3.60372300 | C | 6.26434300  | -0.16615300 | -1.32744200 |
| H     | -4.78988200 | -0.35336500 | -2.41926000 | F | 6.92871200  | 0.78346300  | -1.99307600 |
| H     | -5.40417900 | 0.97276800  | -3.40144400 | C | 6.93138000  | -1.30716300 | -0.90372300 |
| C     | -4.49970200 | 5.39935900  | -1.38880400 | F | 8.23269800  | -1.46457100 | -1.15343900 |
| H     | -4.70763600 | 5.92724200  | -0.45554800 | C | 6.21882700  | -2.27815900 | -0.22537500 |
| H     | -3.67732500 | 5.92234300  | -1.88706300 | F | 6.83538700  | -3.39287500 | 0.18003500  |
| H     | -5.37897100 | 5.47057000  | -2.03242000 | C | 4.85909300  | -2.09518900 | 0.02374700  |

|        |             |             |             |   |             |             |             |
|--------|-------------|-------------|-------------|---|-------------|-------------|-------------|
| F      | 4.27510500  | -3.12323700 | 0.66972400  | C | -4.47507500 | -1.86578900 | -0.27938300 |
| F      | 4.29024300  | 0.98364700  | 1.46757200  | C | -1.40053500 | -3.33518600 | 1.48939300  |
| H      | -1.91244100 | -0.41833900 | 0.62619900  | H | -1.31585000 | -4.31825400 | 1.95600800  |
| C      | -1.88289700 | -1.48157500 | 3.05674500  | H | -0.61891100 | -3.25958800 | 0.72816200  |
| C      | -0.92414300 | -0.47890700 | 3.19988100  | H | -1.19107700 | -2.58082300 | 2.25426900  |
| C      | 0.28325000  | -0.53863400 | 2.50572700  | C | -5.98491000 | -5.20412100 | 0.82116500  |
| C      | 0.58934000  | -1.61482600 | 1.65517600  | H | -6.39941300 | -5.13672200 | 1.83268000  |
| C      | -0.38349600 | -2.62516900 | 1.54739400  | H | -6.81739100 | -5.15791600 | 0.11627200  |
| C      | -1.59902000 | -2.56503700 | 2.22559300  | H | -5.50639100 | -6.18209800 | 0.72872700  |
| H      | -2.81982100 | -1.43476300 | 3.60364400  | C | -5.02826600 | -0.66414000 | -1.00709700 |
| H      | -1.11323000 | 0.35878700  | 3.86618300  | H | -4.30082400 | -0.20452800 | -1.67514400 |
| H      | 1.02246600  | 0.24386100  | 2.65312400  | H | -5.89264200 | -0.96216100 | -1.60422000 |
| H      | -0.15629300 | -3.49163500 | 0.92926800  | H | -5.35104400 | 0.11077500  | -0.30435300 |
| H      | -2.32010600 | -3.37193300 | 2.11774300  | C | -2.85088400 | 0.94653500  | 0.32342200  |
| C      | 1.92564300  | -1.75806200 | 0.98200200  | C | -3.28576600 | 1.10815100  | 1.66042700  |
| H      | 2.67206500  | -1.68727000 | 1.78407400  | C | -3.97010200 | 2.26365100  | 2.02790300  |
| H      | 2.00036900  | -2.78377400 | 0.60678300  | H | -4.29796900 | 2.37149700  | 3.05927300  |
| P11_TS |             |             |             | C | -4.22030700 | 3.29024500  | 1.12229200  |
| P      | -1.91274000 | -0.61059300 | 0.02426000  | C | -3.78248900 | 3.11887500  | -0.18526600 |
| B      | 1.16348400  | -0.33363900 | -0.29527700 | H | -3.96444900 | 3.90890400  | -0.91012000 |
| C      | -1.13342400 | -0.81482600 | -1.65280100 | C | -3.10200700 | 1.97451100  | -0.60842500 |
| H      | -1.06527400 | 0.16767100  | -2.12092600 | C | -3.01068300 | 0.08041900  | 2.73200900  |
| C      | -1.89299200 | -1.76747000 | -2.58404700 | H | -3.33584100 | 0.45234900  | 3.70505200  |
| H      | -2.91037900 | -1.40318300 | -2.76907600 | H | -3.52308100 | -0.86740200 | 2.54031300  |
| H      | -2.00130100 | -2.74089600 | -2.08763700 | H | -1.93695300 | -0.12868300 | 2.79824400  |
| C      | -1.14919000 | -1.95927600 | -3.90524700 | C | -4.87891400 | 4.56887200  | 1.56405300  |
| H      | -1.12095400 | -1.00496200 | -4.44956400 | H | -4.16700600 | 5.18593800  | 2.12243600  |
| H      | -1.69334000 | -2.66974600 | -4.53644700 | H | -5.22802600 | 5.15423600  | 0.71111800  |
| C      | 0.27880200  | -2.43281600 | -3.64987700 | H | -5.72925200 | 4.37090000  | 2.22126900  |
| H      | 0.25492700  | -3.42409200 | -3.17627800 | C | -2.66582500 | 1.95644700  | -2.05436500 |
| H      | 0.81745000  | -2.54511600 | -4.59681500 | H | -1.58503700 | 2.11241400  | -2.14447300 |
| C      | 1.01891000  | -1.45445900 | -2.73818700 | H | -2.90911700 | 1.02147700  | -2.56635000 |
| H      | 2.04833500  | -1.79151600 | -2.59774400 | H | -3.15700900 | 2.76642500  | -2.59688900 |
| H      | 1.07993600  | -0.48300900 | -3.24166900 | C | 2.76281800  | -0.65803600 | -0.36658800 |
| C      | 0.31842600  | -1.27896700 | -1.37503500 | C | 3.77696500  | 0.29523000  | -0.26532000 |
| H      | 0.25327600  | -2.28675300 | -0.93854000 | F | 3.49942000  | 1.60120500  | -0.16039900 |
| C      | -3.15897400 | -1.96846100 | 0.22252900  | C | 5.13053100  | -0.01847400 | -0.21899500 |
| C      | -2.77660400 | -3.14632600 | 0.90480800  | F | 6.04273400  | 0.94619400  | -0.11143800 |
| C      | -3.69480300 | -4.18048000 | 1.06733200  | C | 5.53138800  | -1.34308900 | -0.27581400 |
| H      | -3.38065800 | -5.08173800 | 1.58880900  | F | 6.82155800  | -1.66293700 | -0.22835500 |
| C      | -4.99765300 | -4.09279200 | 0.58292300  | C | 4.56554900  | -2.33236100 | -0.37074300 |
| C      | -5.35898900 | -2.93196800 | -0.08821600 | F | 4.92530400  | -3.61613000 | -0.40733100 |
| H      | -6.36674300 | -2.84437300 | -0.48749800 | C | 3.22659000  | -1.97207900 | -0.40824900 |
|        |             |             |             | F | 2.35674200  | -3.00283900 | -0.42799100 |

|       |             |             |             |   |             |             |             |
|-------|-------------|-------------|-------------|---|-------------|-------------|-------------|
| C     | 0.79737300  | 1.26243700  | -0.44781900 | C | -3.34284000 | -0.34461400 | 2.40839700  |
| C     | 1.23782000  | 1.95534200  | -1.58113700 | C | -4.12858400 | -1.32924300 | 1.81162600  |
| F     | 2.05254600  | 1.34941700  | -2.45692500 | C | 0.66230500  | -1.06897800 | -0.90991300 |
| C     | 0.94010300  | 3.28166000  | -1.85305800 | C | 0.91320600  | -1.26176200 | -2.28363300 |
| F     | 1.41471500  | 3.87565300  | -2.94639400 | C | 1.17094100  | -1.96237200 | 0.05545100  |
| C     | 0.15010800  | 4.00213200  | -0.96368600 | C | 1.62138700  | -2.39947200 | -2.66321800 |
| F     | -0.15962300 | 5.27142300  | -1.21244600 | C | 1.88050700  | -3.08003600 | -0.38581900 |
| C     | -0.29390200 | 3.37905900  | 0.18790200  | C | 2.10568000  | -3.32232500 | -1.73671500 |
| F     | -1.04946400 | 4.03969000  | 1.06351000  | P | -0.31922800 | 0.30887400  | -0.25165800 |
| C     | 0.04498000  | 2.04801300  | 0.41861000  | C | -5.34613700 | -1.87016400 | 2.51301700  |
| F     | -0.40586300 | 1.55772200  | 1.59313900  | H | -6.03323900 | -2.34254700 | 1.80799400  |
| H     | -0.25006700 | -0.60503600 | 0.78812700  | H | -5.05950900 | -2.62233400 | 3.25499400  |
| C     | 4.50974100  | 0.41376600  | 3.57584800  | H | -5.88258200 | -1.07717400 | 3.03960500  |
| C     | 4.29822100  | -0.92956800 | 3.27284300  | C | -1.39984900 | 1.22367800  | 2.50433700  |
| C     | 3.12332900  | -1.32243500 | 2.64356200  | H | -1.21062900 | 2.09153600  | 1.86268700  |
| C     | 2.14020400  | -0.38965500 | 2.28993100  | H | -1.93907200 | 1.57337600  | 3.38625300  |
| C     | 2.34456900  | 0.94690800  | 2.63601100  | H | -0.42692400 | 0.84271200  | 2.83640400  |
| C     | 3.52336000  | 1.34260800  | 3.26535500  | C | -2.29315400 | -1.89984100 | -1.46243000 |
| H     | 5.43058600  | 0.73027000  | 4.05458000  | H | -1.48171000 | -2.63218600 | -1.41625600 |
| H     | 5.05127600  | -1.67250100 | 3.51755900  | H | -3.17521400 | -2.39233500 | -1.87614300 |
| H     | 2.97395300  | -2.36970700 | 2.39110800  | H | -1.99006100 | -1.11986100 | -2.16727800 |
| H     | 1.59241300  | 1.69066500  | 2.41192700  | H | -4.36597700 | -2.55215000 | 0.06632100  |
| H     | 3.66955700  | 2.39077700  | 3.50662300  | H | -3.63346500 | 0.05276400  | 3.37787100  |
| C     | 0.91586700  | -0.90345400 | 1.54676700  | H | 2.27201700  | -3.77386300 | 0.35376600  |
| H     | 1.01122300  | -1.98435700 | 1.42775200  | H | 1.81362700  | -2.56100800 | -3.72121400 |
| H     | 0.08395200  | -0.74842100 | 2.25317700  | C | 2.88943500  | -4.52462800 | -2.19249400 |
| P11_P |             |             |             | H | 3.91012000  | -4.23706200 | -2.46390700 |
| B     | 1.73801300  | 2.41158900  | -1.06605100 | H | 2.95252300  | -5.27929600 | -1.40584500 |
| C     | 0.21784300  | 2.62711400  | -1.59293600 | H | 2.43265100  | -4.98199200 | -3.07386000 |
| C     | -0.19830600 | 3.71566300  | -2.37717800 | C | 1.01394000  | -1.74619000 | 1.54214700  |
| H     | 0.54570100  | 4.45839600  | -2.65211300 | H | -0.03626000 | -1.74365800 | 1.85221200  |
| C     | -1.51003200 | 3.86131800  | -2.81587800 | H | 1.52152800  | -2.54162300 | 2.09013800  |
| H     | -1.78334100 | 4.71774700  | -3.42619900 | H | 1.47074400  | -0.79937600 | 1.85513400  |
| C     | -2.48559400 | 2.91972900  | -2.47873000 | C | 0.51407700  | -0.27809100 | -3.35334400 |
| H     | -3.50981600 | 3.04045400  | -2.81524000 | H | -0.55002400 | -0.02877400 | -3.34080200 |
| C     | -2.13146500 | 1.82792100  | -1.69942800 | H | 1.06308900  | 0.65940100  | -3.21627700 |
| H     | -2.88069100 | 1.09488600  | -1.41146000 | H | 0.75508200  | -0.68407100 | -4.33738300 |
| C     | -0.79777000 | 1.69855800  | -1.28763400 | H | 1.96519200  | 1.20510500  | -1.12819900 |
| H     | 0.44679400  | 0.80868900  | 0.80148000  | H | 2.51344300  | 2.98222500  | -1.80946100 |
| C     | -1.82170200 | -0.35825200 | 0.53586600  | C | 3.65912500  | 0.09439400  | 3.30090000  |
| C     | -2.61128700 | -1.33653900 | -0.09830700 | C | 2.64581300  | 0.95356800  | 3.71747500  |
| C     | -2.19719400 | 0.15654700  | 1.79528600  | C | 2.08912700  | 1.86376900  | 2.81904200  |
| C     | -3.75198200 | -1.80138700 | 0.55774700  | C | 2.51273500  | 1.93890400  | 1.48336300  |
|       |             |             |             | C | 3.53111700  | 1.05913600  | 1.08494700  |

|        |             |             |             |       |             |             |             |
|--------|-------------|-------------|-------------|-------|-------------|-------------|-------------|
| C      | 4.10100200  | 0.15743800  | 1.97993100  | C     | -0.10474000 | -1.32451600 | 0.11624800  |
| H      | 4.09945200  | -0.61407900 | 3.99559100  | C     | -0.20591400 | -2.35440500 | 1.05017900  |
| H      | 2.29215600  | 0.92318700  | 4.74430300  | F     | -0.97322500 | -2.19486000 | 2.14069800  |
| H      | 1.31393900  | 2.54799000  | 3.15946700  | C     | 0.46429400  | -3.56708200 | 0.94687700  |
| H      | 3.86724800  | 1.09004000  | 0.05346900  | F     | 0.34563800  | -4.49584900 | 1.89636700  |
| H      | 4.89111300  | -0.50667500 | 1.64128000  | C     | 1.26802200  | -3.80599100 | -0.15724300 |
| C      | 1.89819500  | 2.92421200  | 0.51581200  | F     | 1.94498100  | -4.94654400 | -0.26614800 |
| H      | 0.93974900  | 3.25830000  | 0.94413900  | C     | 1.38100000  | -2.82879900 | -1.13319900 |
| H      | 2.52748500  | 3.82387600  | 0.51753400  | F     | 2.16120500  | -3.03420200 | -2.19536400 |
| P12_TS |             |             |             | C     | 0.70098000  | -1.62922900 | -0.97645900 |
| P      | 2.12270500  | 0.96013800  | 0.49659500  | F     | 0.91974800  | -0.71032900 | -1.93953000 |
| C      | 1.75997700  | 1.27956300  | 2.25741900  | C     | -2.53360500 | -0.22525700 | 0.05622700  |
| H      | 2.64517300  | 1.11071100  | 2.88086800  | C     | -3.62159300 | 0.21086800  | 0.81394400  |
| H      | 1.49663400  | 2.34287600  | 2.31781400  | F     | -3.46576000 | 0.99550700  | 1.88743600  |
| C      | 0.55649500  | 0.43475200  | 2.70238700  | C     | -4.94585400 | -0.08496200 | 0.50190000  |
| H      | 0.81772800  | -0.62862700 | 2.69546100  | F     | -5.93563700 | 0.36448500  | 1.27370800  |
| H      | 0.36878000  | 0.68420900  | 3.75312400  | C     | -5.23973500 | -0.83051700 | -0.62758900 |
| C      | -0.73662500 | 0.65614000  | 1.90055400  | F     | -6.50060200 | -1.11027800 | -0.94430100 |
| H      | -0.98988000 | 1.72475000  | 1.92184000  | C     | -4.19935600 | -1.26260400 | -1.43688700 |
| H      | -1.51435000 | 0.17907100  | 2.49962500  | F     | -4.46014900 | -1.95646700 | -2.54456800 |
| B      | -0.94612500 | 0.06170200  | 0.38437100  | C     | -2.89456300 | -0.95283500 | -1.08107100 |
| C      | 3.09910700  | 2.35320500  | -0.14684200 | F     | -1.94746100 | -1.35414300 | -1.94784300 |
| C      | 3.06138600  | 2.60850400  | -1.52323600 | H     | 0.55571100  | 0.93781600  | -0.23039200 |
| H      | 2.47242300  | 1.96993800  | -2.17873900 | C     | -2.36022300 | 5.05205400  | 0.39296200  |
| C      | 3.77152000  | 3.67958000  | -2.05688900 | C     | -3.16372700 | 4.07617000  | -0.18859100 |
| H      | 3.73754500  | 3.87215200  | -3.12393700 | C     | -2.60289100 | 2.89108500  | -0.65661000 |
| C      | 4.51066300  | 4.50928400  | -1.21813100 | C     | -1.22993400 | 2.65277000  | -0.54727700 |
| H      | 5.05669500  | 5.35027200  | -1.63306900 | C     | -0.42966400 | 3.65649600  | 0.01352600  |
| C      | 4.54596200  | 4.26538700  | 0.15291200  | C     | -0.98681600 | 4.84099800  | 0.48392400  |
| H      | 5.12293200  | 4.91237700  | 0.80549500  | H     | -2.79747000 | 5.97437700  | 0.76115300  |
| C      | 3.84393200  | 3.19057300  | 0.68905700  | H     | -4.23312400 | 4.23674100  | -0.28310000 |
| H      | 3.87796600  | 3.00338500  | 1.75848800  | H     | -3.23646100 | 2.14135500  | -1.12184200 |
| C      | 3.21024400  | -0.49946700 | 0.39806800  | H     | 0.64941100  | 3.52004100  | 0.06428300  |
| C      | 3.27183600  | -1.42519700 | 1.44347800  | H     | -0.34503900 | 5.60368500  | 0.91435000  |
| H      | 2.75330200  | -1.24071100 | 2.37808200  | C     | -0.61719500 | 1.35820000  | -0.99272100 |
| C      | 3.99435000  | -2.60551000 | 1.28875700  | H     | -1.22169800 | 0.81668700  | -1.72003800 |
| H      | 4.02517300  | -3.32487400 | 2.10090700  | H     | 0.27408500  | 1.59796200  | -1.58864300 |
| C      | 4.65553900  | -2.87109400 | 0.09358700  | P12_P |             |             |             |
| H      | 5.19879100  | -3.80171200 | -0.03165300 | P     | 2.51904300  | 1.00515200  | 0.26251700  |
| C      | 4.61448900  | -1.94050100 | -0.94223100 | C     | 1.64995700  | 1.55587600  | 1.75487600  |
| H      | 5.12746400  | -2.14186000 | -1.87657100 | H     | 2.47094300  | 1.81508800  | 2.43689900  |
| C      | 3.89477500  | -0.76073100 | -0.79447500 | H     | 1.17268500  | 2.50236800  | 1.47172500  |
| H      | 3.85680900  | -0.04868800 | -1.61370500 | C     | 0.62777200  | 0.60906800  | 2.41372400  |

|   |             |             |             |        |             |             |             |
|---|-------------|-------------|-------------|--------|-------------|-------------|-------------|
| H | 0.99791200  | -0.42045000 | 2.38345000  | C      | -5.34571800 | -1.18436900 | -0.38756200 |
| H | 0.62683000  | 0.89066400  | 3.47381000  | F      | -6.59679200 | -1.57367800 | -0.63354100 |
| C | -0.80319100 | 0.67876400  | 1.86884700  | C      | -4.33256200 | -1.45883500 | -1.29415100 |
| H | -1.16715500 | 1.70651200  | 2.00350700  | F      | -4.61075000 | -2.11180300 | -2.42543700 |
| H | -1.39313600 | 0.07899400  | 2.56414500  | C      | -3.03909700 | -1.04116300 | -1.01025200 |
| B | -1.11481100 | 0.19171600  | 0.32137900  | F      | -2.12736500 | -1.29897100 | -1.96868000 |
| C | 3.62883700  | 2.33282400  | -0.24612900 | C      | -3.63387500 | 4.74702900  | 0.18598600  |
| C | 3.07154100  | 3.44920100  | -0.88079200 | C      | -4.11115200 | 3.64105900  | -0.51332800 |
| H | 2.00606500  | 3.48660500  | -1.09966900 | C      | -3.26024200 | 2.58881700  | -0.83511800 |
| C | 3.89212000  | 4.51228800  | -1.23899700 | C      | -1.90885000 | 2.60336100  | -0.46218500 |
| H | 3.46635600  | 5.37748600  | -1.73507600 | C      | -1.44851200 | 3.73182900  | 0.22631900  |
| C | 5.25813100  | 4.45996300  | -0.96602100 | C      | -2.29224000 | 4.79014700  | 0.55140900  |
| H | 5.89605000  | 5.29031700  | -1.24991900 | H      | -4.29835400 | 5.56751000  | 0.43652700  |
| C | 5.80995000  | 3.34715000  | -0.33654400 | H      | -5.15339200 | 3.59796400  | -0.81474900 |
| H | 6.87420200  | 3.30896100  | -0.13126800 | H      | -3.64551100 | 1.73794800  | -1.39108500 |
| C | 4.99731300  | 2.27708700  | 0.02595900  | H      | -0.39661500 | 3.78637800  | 0.50599400  |
| H | 5.42426600  | 1.40143200  | 0.50661600  | H      | -1.90022800 | 5.64948500  | 1.08752000  |
| C | 3.44304900  | -0.51566700 | 0.49464300  | C      | -0.99532400 | 1.44984500  | -0.77686200 |
| C | 3.60096300  | -1.09605000 | 1.75505400  | H      | -1.22406100 | 1.07174800  | -1.77827700 |
| H | 3.18965700  | -0.62099600 | 2.63997800  | H      | 0.02304200  | 1.86280600  | -0.84041700 |
| C | 4.27505300  | -2.31000200 | 1.86852000  | H      | 1.65369100  | 0.81903500  | -0.81437100 |
| H | 4.38314600  | -2.77429300 | 2.84230800  |        |             |             |             |
| C | 4.78966500  | -2.93144000 | 0.73464700  | P13_TS |             |             |             |
| H | 5.29356700  | -3.88766600 | 0.82582000  | P      | 2.54815200  | -0.56361100 | -0.26173300 |
| C | 4.64574400  | -2.34255700 | -0.52155000 | B      | -0.70128400 | -0.24505100 | -0.61750900 |
| H | 5.02499300  | -2.83952700 | -1.40734400 | C      | 2.85809600  | 0.38446400  | -1.80689600 |
| C | 3.97275200  | -1.13464500 | -0.64504700 | H      | 2.43314100  | 1.38645500  | -1.67139700 |
| H | 3.81840700  | -0.70089100 | -1.63033000 | H      | 3.94200800  | 0.49148400  | -1.92666600 |
| C | -0.12555300 | -1.11104100 | -0.04804300 | C      | 2.22088300  | -0.29277000 | -3.02342000 |
| C | 0.01704300  | -2.15799900 | 0.86604300  | H      | 2.62449300  | 0.19272200  | -3.91888200 |
| F | -0.63446400 | -2.12388200 | 2.03912600  | H      | 2.54442100  | -1.34063100 | -3.06952200 |
| C | 0.83617000  | -3.26654900 | 0.67894200  | C      | 0.69433900  | -0.21662900 | -3.07164600 |
| F | 0.96476300  | -4.19283500 | 1.63068100  | H      | 0.39839800  | -0.62246900 | -4.04522400 |
| C | 1.53630200  | -3.39894900 | -0.50918000 | H      | 0.40503600  | 0.83805000  | -3.10455000 |
| F | 2.37113400  | -4.42169200 | -0.70072800 | C      | -0.09287100 | -0.98546600 | -1.98165300 |
| C | 1.39838900  | -2.41807700 | -1.47634900 | H      | 0.47889300  | -1.88694200 | -1.71722800 |
| F | 2.12531900  | -2.49255200 | -2.59863300 | H      | -0.97069600 | -1.38760000 | -2.49279300 |
| C | 0.58613900  | -1.31942800 | -1.22729600 | C      | 3.65571500  | 0.17836500  | 0.98406600  |
| F | 0.59695200  | -0.38155700 | -2.20069800 | C      | 4.21318400  | -0.61926900 | 1.98866600  |
| C | -2.66536200 | -0.35946400 | 0.14875400  | H      | 4.04257700  | -1.69237900 | 1.98769300  |
| C | -3.72684600 | -0.09122300 | 1.01013700  | C      | 4.99857500  | -0.04506000 | 2.98365800  |
| F | -3.55024200 | 0.61820000  | 2.13546900  | H      | 5.42911500  | -0.67273900 | 3.75704100  |
| C | -5.03838700 | -0.49148500 | 0.77157100  | C      | 5.23000600  | 1.32751700  | 2.98630000  |
| F | -6.00686800 | -0.20073200 | 1.64348600  | H      | 5.84160600  | 1.77412500  | 3.76349300  |

|   |             |             |             |       |             |             |             |
|---|-------------|-------------|-------------|-------|-------------|-------------|-------------|
| C | 4.67180900  | 2.12789000  | 1.99263600  | H     | -4.39273700 | -0.07728000 | 4.34288000  |
| H | 4.83959800  | 3.19979500  | 1.99398500  | H     | -2.72323400 | 1.69905100  | 3.87726500  |
| C | 3.88648300  | 1.55827200  | 0.99687300  | H     | -0.79773000 | 1.24722900  | 2.42169700  |
| H | 3.44326700  | 2.19940300  | 0.24011500  | H     | -2.15637500 | -2.78177500 | 1.87113500  |
| C | 3.29488600  | -2.20178600 | -0.57251200 | H     | -4.07859600 | -2.33930300 | 3.35213000  |
| C | 4.65392800  | -2.31285100 | -0.89314900 | C     | -0.21295700 | -1.11842600 | 1.06208000  |
| H | 5.27545600  | -1.42158500 | -0.93051700 | H     | 0.68508800  | -1.04754400 | 1.69374100  |
| C | 5.21442600  | -3.55939100 | -1.14243500 | H     | -0.28737600 | -2.16603500 | 0.75439400  |
| H | 6.26742800  | -3.63819100 | -1.39233200 |       |             |             |             |
| C | 4.42490500  | -4.70696300 | -1.06665900 | P13_P |             |             |             |
| H | 4.86479600  | -5.68014700 | -1.25950100 | P     | 2.87514100  | -0.66453600 | -0.28432300 |
| C | 3.07743600  | -4.60577400 | -0.73949500 | B     | -0.99927600 | -0.54573800 | -0.24788400 |
| H | 2.46186500  | -5.49686600 | -0.67686800 | C     | 2.56145100  | -0.09197100 | -1.98285400 |
| C | 2.51239900  | -3.35589700 | -0.49245800 | H     | 2.02609000  | 0.86310300  | -1.90419400 |
| H | 1.45858000  | -3.28252100 | -0.23883300 | H     | 3.56265900  | 0.11770100  | -2.37935500 |
| C | -0.36304000 | 1.35279000  | -0.57781000 | C     | 1.80256700  | -1.07526600 | -2.89366300 |
| C | 0.47861100  | 2.04822600  | 0.27928000  | H     | 2.04993100  | -0.78741800 | -3.92112900 |
| F | 1.05847100  | 1.43611700  | 1.33593100  | H     | 2.20238200  | -2.08714500 | -2.74980100 |
| C | 0.80905300  | 3.39283700  | 0.13276400  | C     | 0.28379600  | -1.07268700 | -2.70994500 |
| F | 1.66254700  | 3.97387300  | 0.98052400  | H     | -0.12303000 | -1.72369100 | -3.49138500 |
| C | 0.25836200  | 4.11931300  | -0.90866000 | H     | -0.08634100 | -0.07383900 | -2.95052700 |
| F | 0.56110700  | 5.40390500  | -1.07149100 | C     | -0.20112500 | -1.54942900 | -1.32211600 |
| C | -0.61816500 | 3.48467800  | -1.78060900 | H     | 0.65754800  | -2.00747400 | -0.80274600 |
| F | -1.15919500 | 4.16740700  | -2.78718100 | H     | -0.85629000 | -2.40754300 | -1.47399600 |
| C | -0.90270500 | 2.14121500  | -1.59497400 | C     | 4.09130500  | 0.41606400  | 0.49242100  |
| F | -1.74180600 | 1.57773200  | -2.47521800 | C     | 4.82986000  | -0.06541400 | 1.58029700  |
| C | -2.29923200 | -0.57929100 | -0.52704800 | H     | 4.69332400  | -1.08592300 | 1.92647800  |
| C | -3.30054900 | 0.32637600  | -0.18531200 | C     | 5.74396700  | 0.76814600  | 2.21151500  |
| F | -3.01667300 | 1.61067400  | 0.06884700  | H     | 6.31540300  | 0.39878900  | 3.05592000  |
| C | -4.63866100 | -0.02335900 | -0.04462000 | C     | 5.92397400  | 2.07489400  | 1.75998900  |
| F | -5.54559600 | 0.89386000  | 0.28805400  | H     | 6.63644400  | 2.72407400  | 2.25794400  |
| C | -5.02989200 | -1.33679600 | -0.24790000 | C     | 5.19239600  | 2.55214200  | 0.67723700  |
| F | -6.30554300 | -1.69067200 | -0.11150700 | H     | 5.32439800  | 3.57143700  | 0.33206600  |
| C | -4.07130700 | -2.28092500 | -0.58160100 | C     | 4.27494300  | 1.72446800  | 0.03818100  |
| F | -4.42009500 | -3.55870300 | -0.74347100 | H     | 3.69650300  | 2.11064000  | -0.79596700 |
| C | -2.74859700 | -1.88582000 | -0.70859300 | C     | 3.50313700  | -2.34756200 | -0.25697100 |
| F | -1.86273300 | -2.87967800 | -0.92991500 | C     | 4.72005000  | -2.64980100 | -0.87838200 |
| H | 0.84172900  | -0.62418800 | 0.22827900  | H     | 5.29603000  | -1.87018700 | -1.37078100 |
| C | -3.53939000 | -0.28258100 | 3.70495000  | C     | 5.19585100  | -3.95452200 | -0.85197800 |
| C | -2.60478700 | 0.71263300  | 3.43997400  | H     | 6.13652300  | -4.19654900 | -1.33429800 |
| C | -1.51581200 | 0.46011800  | 2.60911800  | C     | 4.46426000  | -4.94929300 | -0.20283600 |
| C | -1.35122000 | -0.79346300 | 2.01628400  | H     | 4.83960400  | -5.96706000 | -0.18413700 |
| C | -2.27666200 | -1.79818400 | 2.31934300  | C     | 3.25816100  | -4.64549200 | 0.42158900  |
| C | -3.36407800 | -1.54755000 | 3.14859700  | H     | 2.69249300  | -5.42074600 | 0.92623400  |

|        |             |             |             |   |             |             |             |
|--------|-------------|-------------|-------------|---|-------------|-------------|-------------|
| C      | 2.76935000  | -3.34209000 | 0.39614700  | H | 2.46328200  | 1.81982800  | -0.33913400 |
| H      | 1.82125600  | -3.10291600 | 0.87217500  | H | 3.80116000  | 1.50759100  | -1.44546700 |
| C      | -0.29997300 | 0.97363000  | -0.32027800 | C | 1.82292000  | 0.84127600  | -2.15119000 |
| C      | 0.61506900  | 1.53463100  | 0.56773200  | H | 2.33476500  | 0.50612300  | -3.06221600 |
| F      | 0.99618900  | 0.89068700  | 1.70036200  | H | 1.36887200  | 1.80718400  | -2.40139100 |
| C      | 1.25439800  | 2.76144300  | 0.38950400  | C | 0.71868400  | -0.17159100 | -1.80344400 |
| F      | 2.13387500  | 3.20838800  | 1.29120700  | H | 1.10086700  | -1.18654800 | -1.88776400 |
| C      | 0.99743600  | 3.50620300  | -0.74707500 | H | -0.04042000 | -0.09093200 | -2.59212300 |
| F      | 1.62120100  | 4.66599400  | -0.95526900 | C | 4.13757300  | -1.64198500 | -1.07242300 |
| C      | 0.06951100  | 3.02194000  | -1.66085000 | C | 5.24356400  | -0.93650900 | -1.86993100 |
| F      | -0.21870700 | 3.73635800  | -2.74786800 | H | 5.79441500  | -1.69038000 | -2.44454300 |
| C      | -0.55141800 | 1.80401600  | -1.42058600 | H | 5.96192300  | -0.40677800 | -1.24462400 |
| F      | -1.46110300 | 1.44562300  | -2.33856400 | H | 4.81978800  | -0.22599500 | -2.58590300 |
| C      | -2.62578200 | -0.45437700 | -0.55931600 | C | 4.72747800  | -2.73328900 | -0.16650900 |
| C      | -3.40588800 | 0.68951600  | -0.38361400 | H | 3.94324000  | -3.24332800 | 0.40256200  |
| F      | -2.84513700 | 1.87137900  | -0.07067400 | H | 5.47539200  | -2.35813100 | 0.53273500  |
| C      | -4.79138600 | 0.72204200  | -0.48461000 | H | 5.21665200  | -3.48253600 | -0.79848000 |
| F      | -5.45738700 | 1.86697200  | -0.31744000 | C | 3.23197300  | -2.35958500 | -2.08602300 |
| C      | -5.48755100 | -0.44521400 | -0.74969500 | H | 2.83975100  | -1.67881800 | -2.84414600 |
| F      | -6.81729800 | -0.43824800 | -0.84921000 | H | 2.39626400  | -2.87165900 | -1.60542600 |
| C      | -4.77353600 | -1.62192800 | -0.89493200 | H | 3.83811600  | -3.11099000 | -2.60463100 |
| F      | -5.41902700 | -2.77240800 | -1.11020600 | C | 4.15188700  | 0.13922400  | 1.46939800  |
| C      | -3.38857400 | -1.60007600 | -0.78527900 | C | 3.60067800  | 1.47154000  | 2.00502000  |
| F      | -2.81323600 | -2.82243900 | -0.83291200 | H | 2.54265800  | 1.42958400  | 2.26335100  |
| C      | -4.00887300 | 0.05471300  | 3.93608800  | H | 3.74890400  | 2.29384700  | 1.30063600  |
| C      | -2.84250200 | 0.79973900  | 3.78836700  | H | 4.15139000  | 1.71838300  | 2.91931700  |
| C      | -1.82360100 | 0.35777200  | 2.94856100  | C | 5.63678000  | 0.37710700  | 1.16315100  |
| C      | -1.94133600 | -0.84252500 | 2.23840400  | H | 6.11766200  | 0.76823800  | 2.06728000  |
| C      | -3.11625600 | -1.58614000 | 2.40963400  | H | 5.76882700  | 1.12275700  | 0.37274200  |
| C      | -4.14041800 | -1.14487700 | 3.24117700  | H | 6.17301300  | -0.52900500 | 0.87842300  |
| H      | -4.80604100 | 0.40462900  | 4.58415000  | C | 3.99602600  | -0.90969900 | 2.58324600  |
| H      | -2.72588200 | 1.73658900  | 4.32537000  | H | 4.39009300  | -1.88829300 | 2.30458600  |
| H      | -0.92221300 | 0.95200700  | 2.84247200  | H | 2.94543000  | -1.03394200 | 2.86283700  |
| H      | -3.22874300 | -2.51934000 | 1.86174400  | H | 4.54187400  | -0.57187800 | 3.47139600  |
| H      | -5.04358800 | -1.73908800 | 3.34477700  | C | -0.67668800 | 1.53920700  | -0.46366700 |
| C      | -0.90479500 | -1.28967800 | 1.24070200  | C | -0.11283100 | 2.59559600  | 0.23605300  |
| H      | 0.09551800  | -1.20609600 | 1.68729800  | F | 0.84187100  | 2.37087400  | 1.17076000  |
| H      | -1.06393600 | -2.35858300 | 1.04111900  | C | -0.44805400 | 3.93289800  | 0.05751100  |
| H      | 1.71408300  | -0.69751100 | 0.48463200  | F | 0.13278200  | 4.87837800  | 0.79712900  |
|        |             |             |             | C | -1.37918800 | 4.27380500  | -0.90751600 |
| P14_TS |             |             |             | F | -1.71691000 | 5.54515200  | -1.10471400 |
| P      | 3.12161500  | -0.41812600 | -0.02745800 | C | -1.94469700 | 3.26533900  | -1.67605000 |
| B      | -0.20246500 | -0.02118100 | -0.43682700 | F | -2.81981400 | 3.57338600  | -2.63103600 |
| C      | 2.86984800  | 1.09179800  | -1.04728500 | C | -1.57596000 | 1.94685600  | -1.45363600 |



|       |             |             |             |   |             |             |             |
|-------|-------------|-------------|-------------|---|-------------|-------------|-------------|
| F     | -2.12271700 | 1.04192400  | -2.27920000 | H | 4.64314700  | -0.01229300 | -2.73073400 |
| C     | -1.36071700 | -1.16488300 | -0.53312200 | C | 5.36992700  | -2.81120400 | -0.78315100 |
| C     | -1.00762300 | -2.50261800 | -0.68666900 | H | 4.80696400  | -3.51877900 | -0.16686500 |
| F     | 0.29580800  | -2.86286500 | -0.70286300 | H | 6.17981200  | -2.38745300 | -0.18619300 |
| C     | -1.91702100 | -3.55001000 | -0.74659200 | H | 5.82585400  | -3.37840300 | -1.60068000 |
| F     | -1.50110200 | -4.80882700 | -0.89531700 | C | 3.43598900  | -2.45582100 | -2.30477000 |
| C     | -3.27092300 | -3.27340600 | -0.63377800 | H | 2.77376700  | -1.76410200 | -2.82548400 |
| F     | -4.16447500 | -4.25781200 | -0.68613700 | H | 2.81813900  | -3.16180800 | -1.74199600 |
| C     | -3.67721600 | -1.96164900 | -0.44221600 | H | 3.99461900  | -3.02252900 | -3.05678100 |
| F     | -4.97115200 | -1.68726000 | -0.28477000 | C | 4.47501400  | -0.40510300 | 1.45928700  |
| C     | -2.72863300 | -0.94867900 | -0.37953500 | C | 3.65555600  | 0.61268800  | 2.27509700  |
| F     | -3.20211800 | 0.26567900  | -0.08405300 | H | 2.65348000  | 0.24929700  | 2.51724600  |
| H     | 1.30309100  | -0.45870500 | 0.28521800  | H | 3.55915900  | 1.57673700  | 1.77167300  |
| C     | -3.33027500 | -0.15515900 | 3.65219600  | H | 4.18621000  | 0.78019500  | 3.21766800  |
| C     | -2.56406000 | 0.97916200  | 3.40779900  | C | 5.83162600  | 0.22141300  | 1.10800000  |
| C     | -1.38387000 | 0.88929300  | 2.67459500  | H | 6.31137100  | 0.54211700  | 2.03797100  |
| C     | -0.95502500 | -0.33607200 | 2.15832700  | H | 5.72076700  | 1.10790400  | 0.47537100  |
| C     | -1.71379300 | -1.47610700 | 2.44668200  | H | 6.50779600  | -0.47976100 | 0.61386200  |
| C     | -2.89232100 | -1.38915500 | 3.17870300  | C | 4.65203900  | -1.67302600 | 2.30931400  |
| H     | -4.25321100 | -0.08246300 | 4.21811800  | H | 5.26207800  | -2.43471800 | 1.82236500  |
| H     | -2.88166600 | 1.94357000  | 3.79144200  | H | 3.68489000  | -2.11092200 | 2.57417400  |
| H     | -0.78292600 | 1.77770800  | 2.52359100  | H | 5.15399500  | -1.39311300 | 3.24075800  |
| H     | -1.38077700 | -2.44412900 | 2.07948900  | C | -0.55531300 | 1.57140900  | -0.33947700 |
| H     | -3.46707400 | -2.28787600 | 3.37973300  | C | 0.09063400  | 2.45395900  | 0.51626800  |
| C     | 0.34510400  | -0.47222700 | 1.37811500  | F | 0.89894800  | 2.00538900  | 1.51774800  |
| H     | 1.08059800  | 0.15175900  | 1.88741700  | C | 0.01777200  | 3.84204300  | 0.43322100  |
| H     | 0.66489100  | -1.51690300 | 1.46553800  | F | 0.68210600  | 4.60994200  | 1.30229000  |
| P14_P |             |             |             | C | -0.73313300 | 4.42115200  | -0.57303600 |
| P     | 3.51758200  | -0.82150300 | -0.08592000 | F | -0.81529900 | 5.74660200  | -0.68383700 |
| B     | -0.40075900 | -0.07754500 | -0.38532100 | C | -1.38873400 | 3.59444900  | -1.47672000 |
| C     | 2.76195700  | 0.70404600  | -0.72684100 | F | -2.10450600 | 4.13496600  | -2.46351600 |
| H     | 2.22251700  | 1.11696300  | 0.12895400  | C | -1.27765300 | 2.21834400  | -1.34686200 |
| H     | 3.59519300  | 1.38246600  | -0.95184000 | F | -1.92060900 | 1.49200500  | -2.27315500 |
| C     | 1.79517200  | 0.55909800  | -1.91271000 | C | -1.84725400 | -0.82795900 | -0.65870900 |
| H     | 2.36050200  | 0.28730200  | -2.81405200 | C | -1.89178700 | -2.15876100 | -1.06267100 |
| H     | 1.41477000  | 1.57018500  | -2.09792700 | F | -0.74954300 | -2.83377900 | -1.33052600 |
| C     | 0.62384200  | -0.39607200 | -1.66256800 | C | -3.05435900 | -2.91232900 | -1.16682900 |
| H     | 1.00339600  | -1.42131800 | -1.56850400 | F | -3.00788200 | -4.19011900 | -1.55883900 |
| H     | 0.02702100  | -0.40064100 | -2.58375200 | C | -4.26913900 | -2.33020400 | -0.84502100 |
| C     | 4.45887100  | -1.74138900 | -1.40157800 | F | -5.40148500 | -3.02916800 | -0.93720700 |
| C     | 5.28182600  | -0.74709200 | -2.23332300 | C | -4.28661700 | -1.01094000 | -0.41997900 |
| H     | 5.81364600  | -1.30468000 | -3.01061500 | F | -5.44727500 | -0.43759700 | -0.09540600 |
| H     | 6.02786600  | -0.21658200 | -1.63601700 | C | -3.09492800 | -0.30233000 | -0.32901300 |
|       |             |             |             | F | -3.21156300 | 0.95377600  | 0.12870900  |

|        |             |             |             |   |             |             |             |
|--------|-------------|-------------|-------------|---|-------------|-------------|-------------|
| C      | -3.00977500 | -1.03108700 | 4.00628000  | C | 4.52761000  | -4.07234700 | 0.13854800  |
| C      | -2.28740800 | 0.14850000  | 3.85217800  | F | 5.42273800  | -5.04673300 | 0.14077600  |
| C      | -1.25859500 | 0.23023300  | 2.91753300  | C | 3.35947300  | -4.20237000 | 0.87980200  |
| C      | -0.92362100 | -0.86613300 | 2.11490900  | F | 3.14176000  | -5.30052000 | 1.59098000  |
| C      | -1.65191400 | -2.04949600 | 2.29290200  | C | 2.43632300  | -3.16784100 | 0.86825000  |
| C      | -2.68473400 | -2.13388800 | 3.22067800  | F | 1.32007300  | -3.31178800 | 1.58617300  |
| H      | -3.81699300 | -1.09052500 | 4.72918800  | C | -0.97012100 | 1.26476700  | 0.00510100  |
| H      | -2.52933400 | 1.01596900  | 4.45905500  | C | -1.17836000 | 2.02237400  | -1.15007300 |
| H      | -0.70604000 | 1.15727800  | 2.80857300  | F | -1.78090600 | 1.46635900  | -2.20984400 |
| H      | -1.40845400 | -2.91340000 | 1.67781800  | C | -0.79057300 | 3.34606300  | -1.29795600 |
| H      | -3.23751000 | -3.06244700 | 3.32820000  | F | -1.00560900 | 3.99503400  | -2.43802800 |
| C      | 0.12420600  | -0.77517000 | 1.03517900  | C | -0.16667100 | 3.99295400  | -0.23862600 |
| H      | 1.01205200  | -0.27502300 | 1.43781300  | F | 0.26530800  | 5.24218500  | -0.36889600 |
| H      | 0.41740600  | -1.80355600 | 0.77200700  | C | 0.03926700  | 3.30120000  | 0.94244600  |
| H      | 2.49914700  | -1.68823400 | 0.33226800  | F | 0.68644100  | 3.88257500  | 1.95475200  |
| P15-TS |             |             |             | C | -0.36038100 | 1.97301900  | 1.03500000  |
| P      | 1.34182400  | -0.72234800 | 0.20968000  | F | -0.02361100 | 1.36384700  | 2.19434600  |
| B      | -1.27643500 | -0.34596800 | -0.05521200 | C | -2.75849200 | -0.72413000 | -0.59232300 |
| C      | -0.05718000 | -1.10465600 | -0.89546400 | C | -3.83977900 | 0.15894800  | -0.56184600 |
| H      | -0.13630200 | -2.17174900 | -0.63039300 | F | -3.68047600 | 1.42979400  | -0.17432400 |
| C      | -0.01683200 | -1.01682400 | -2.41789800 | C | -5.13901500 | -0.20521800 | -0.88817800 |
| H      | -0.07472900 | 0.02037200  | -2.74590100 | F | -6.12727600 | 0.68406800  | -0.82816200 |
| H      | -0.93441100 | -1.50113900 | -2.77272500 | C | -5.40905400 | -1.51095500 | -1.26983700 |
| C      | 1.19765600  | -1.70131100 | -3.03789900 | F | -6.64688000 | -1.87933000 | -1.58261000 |
| H      | 2.11983500  | -1.16886800 | -2.78541500 | C | -4.37175000 | -2.42844300 | -1.31894500 |
| H      | 1.12052500  | -1.72669400 | -4.12759200 | F | -4.61006700 | -3.69036200 | -1.67475400 |
| H      | 1.29025600  | -2.73439700 | -2.68380800 | C | -3.08831100 | -2.01918500 | -0.98254100 |
| C      | 2.22784700  | 0.85712600  | 0.04463100  | F | -2.15110800 | -2.98824200 | -1.00271200 |
| C      | 2.24875800  | 1.67808900  | -1.07739400 | H | -0.01485900 | -0.70786600 | 1.26632000  |
| F      | 1.71430200  | 1.27407000  | -2.22711100 | C | -5.23893200 | -0.09599800 | 3.09757200  |
| C      | 2.79323000  | 2.95427600  | -1.03886200 | C | -4.95864900 | -1.37978300 | 2.63514300  |
| F      | 2.75390600  | 3.73173700  | -2.11319400 | C | -3.67634000 | -1.69956900 | 2.20453600  |
| C      | 3.35415700  | 3.42704500  | 0.14087500  | C | -2.65457200 | -0.74415500 | 2.21807600  |
| F      | 3.87688800  | 4.64090200  | 0.18353800  | C | -2.93421900 | 0.52837400  | 2.71635000  |
| C      | 3.37166100  | 2.62182100  | 1.27405600  | C | -4.21965700 | 0.84882000  | 3.14699400  |
| F      | 3.91119300  | 3.06921500  | 2.39897500  | H | -6.24099400 | 0.16198500  | 3.42353300  |
| C      | 2.80818200  | 1.35706600  | 1.21164800  | H | -5.73965300 | -2.13320700 | 2.60308200  |
| F      | 2.81530100  | 0.60984300  | 2.31541600  | H | -3.46637100 | -2.69819700 | 1.82920000  |
| C      | 2.63383700  | -2.00242400 | 0.13019000  | H | -2.15079500 | 1.27422000  | 2.77290800  |
| C      | 3.80873400  | -1.90992300 | -0.61422700 | H | -4.42214200 | 1.84805600  | 3.51914800  |
| F      | 4.05232800  | -0.84049000 | -1.37173400 | C | -1.29660400 | -1.13975800 | 1.66129800  |
| C      | 4.75435100  | -2.92559100 | -0.61350200 | H | -1.29581700 | -2.20309400 | 1.40286600  |
| F      | 5.86593000  | -2.81271500 | -1.32909800 | H | -0.61539800 | -1.05819000 | 2.52956300  |

|       |             |             |             |        |             |             |             |
|-------|-------------|-------------|-------------|--------|-------------|-------------|-------------|
| P15_P |             |             |             | F      | 0.07988600  | -1.51883500 | 2.07239400  |
| P     | -1.50521600 | 0.67698200  | 0.38332000  | C      | 2.68851600  | 1.09246200  | -0.52871200 |
| B     | 1.34992400  | 0.50004200  | 0.22305300  | C      | 3.84780900  | 0.33919100  | -0.70849300 |
| C     | -0.02081400 | 1.28703300  | -0.43155600 | F      | 3.86200300  | -0.96985300 | -0.42519500 |
| H     | -0.03264100 | 2.30342700  | -0.00249000 | C      | 5.05624800  | 0.86651900  | -1.14541000 |
| C     | -0.06242400 | 1.40502700  | -1.96422900 | F      | 6.12320800  | 0.08321200  | -1.29387800 |
| H     | 0.10248200  | 0.42606200  | -2.41522600 | C      | 5.15868800  | 2.22425900  | -1.40508600 |
| H     | 0.81370800  | 2.00398400  | -2.22040200 | F      | 6.30926900  | 2.74992100  | -1.81911500 |
| C     | -1.30126900 | 2.06486900  | -2.56476200 | C      | 4.04441400  | 3.02743600  | -1.22230500 |
| H     | -2.18414600 | 1.42193800  | -2.49536600 | F      | 4.11810300  | 4.33932700  | -1.45549100 |
| H     | -1.14307000 | 2.26914200  | -3.62639000 | C      | 2.85937400  | 2.45027100  | -0.78428700 |
| H     | -1.52259800 | 3.01923100  | -2.07346900 | F      | 1.83724400  | 3.31752300  | -0.59266100 |
| C     | -2.14108400 | -0.99165000 | 0.10132100  | H      | -1.23209500 | 0.66287300  | 1.75005800  |
| C     | -2.07765800 | -1.64874900 | -1.12335300 | C      | 5.34280400  | -0.51302400 | 3.34331200  |
| F     | -1.63230600 | -1.01336600 | -2.20158800 | C      | 5.25050100  | 0.75361900  | 2.77330200  |
| C     | -2.46466200 | -2.97310000 | -1.25550300 | C      | 4.02610700  | 1.22345700  | 2.30889600  |
| F     | -2.36364000 | -3.58818200 | -2.42346000 | C      | 2.86634300  | 0.44274100  | 2.39024300  |
| C     | -2.93441500 | -3.66182200 | -0.14243500 | C      | 2.97461700  | -0.82071500 | 2.98179700  |
| F     | -3.29522700 | -4.92529900 | -0.25721100 | C      | 4.19653200  | -1.29386500 | 3.45191100  |
| C     | -3.03074000 | -3.02388500 | 1.08904200  | H      | 6.29627000  | -0.88372000 | 3.70548900  |
| F     | -3.48123100 | -3.68173700 | 2.14437800  | H      | 6.13334100  | 1.38073300  | 2.69186900  |
| C     | -2.63344800 | -1.70058600 | 1.19782700  | H      | 3.96549200  | 2.21627200  | 1.86765800  |
| F     | -2.72072600 | -1.10817800 | 2.38639100  | H      | 2.08775000  | -1.43674200 | 3.08922400  |
| C     | -2.93834100 | 1.79075200  | 0.29655200  | H      | 4.25166500  | -2.27879000 | 3.90594300  |
| C     | -4.02579300 | 1.60068900  | -0.55240600 | C      | 1.56255800  | 0.93585500  | 1.80818700  |
| F     | -4.06882100 | 0.55338100  | -1.37491700 | H      | 1.57070200  | 2.03512100  | 1.82370900  |
| C     | -5.07823400 | 2.50241000  | -0.59462300 | H      | 0.74900300  | 0.62075500  | 2.47000400  |
| F     | -6.10136100 | 2.30648000  | -1.41256500 |        |             |             |             |
| C     | -5.05266000 | 3.62167900  | 0.23104600  | P18_TS |             |             |             |
| F     | -6.05152700 | 4.48451900  | 0.19688500  | P      | 2.28945800  | 0.74485900  | -0.17263400 |
| C     | -3.97796900 | 3.84178400  | 1.08522300  | Si     | -3.24250400 | -0.37423000 | 2.39876800  |
| F     | -3.95651100 | 4.91009600  | 1.86681800  | B      | -0.97575700 | -0.21252700 | -0.39714800 |
| C     | -2.93698000 | 2.92582600  | 1.10558400  | C      | 1.41617600  | 1.30642600  | 1.35252600  |
| F     | -1.90423300 | 3.14546400  | 1.91769900  | H      | 1.18628700  | 0.45672200  | 1.99339100  |
| C     | 1.12824800  | -1.12014800 | -0.03566000 | H      | 2.02851000  | 2.01647700  | 1.91385800  |
| C     | 1.39938800  | -1.72979900 | -1.26231200 | C      | 0.09384900  | 1.94224900  | 0.87153200  |
| F     | 1.92576900  | -1.01775800 | -2.26786600 | H      | -0.17397100 | 2.75627800  | 1.54514100  |
| C     | 1.14037100  | -3.06433200 | -1.55248900 | H      | 0.26727300  | 2.40410600  | -0.10521900 |
| F     | 1.41451200  | -3.56624400 | -2.75366000 | C      | -1.00677300 | 0.88607000  | 0.81323400  |
| C     | 0.57993800  | -3.87674200 | -0.57658100 | C      | -1.87657100 | 0.85225100  | 1.84999600  |
| F     | 0.26652900  | -5.14194900 | -0.84121500 | C      | -2.94904200 | -0.70797400 | 4.23670100  |
| C     | 0.28811000  | -3.32907900 | 0.66104300  | H      | -3.71194800 | -1.40901000 | 4.59212600  |
| F     | -0.33332100 | -4.06916700 | 1.58668300  | H      | -3.01204100 | 0.19895400  | 4.84237500  |
| C     | 0.55329100  | -1.98495200 | 0.89032900  | H      | -1.97054000 | -1.16732400 | 4.40831200  |

|   |             |             |             |   |             |             |             |
|---|-------------|-------------|-------------|---|-------------|-------------|-------------|
| C | -4.92100200 | 0.48375100  | 2.26485800  | C | 4.24770000  | -2.66194300 | 1.24233000  |
| H | -5.14356300 | 0.84845800  | 1.25910100  | H | 4.40790400  | -3.18689000 | 2.18143100  |
| H | -4.96901400 | 1.33608200  | 2.94904700  | C | 3.55119100  | -1.44797300 | 1.27464300  |
| H | -5.70948600 | -0.21935700 | 2.55433600  | C | 3.57866500  | -0.67793900 | -2.49103700 |
| C | -3.39287800 | -2.08613000 | 1.60572600  | H | 4.02766100  | -1.27773100 | -3.28424500 |
| H | -3.73989500 | -2.77313800 | 2.38489600  | H | 4.01920500  | 0.32325800  | -2.53342900 |
| H | -2.46353600 | -2.49013200 | 1.19795600  | H | 2.50829700  | -0.59628400 | -2.70977100 |
| H | -4.14133800 | -2.08628300 | 0.80900900  | C | 5.34992500  | -4.59663200 | 0.05222100  |
| C | -1.79600200 | 1.90338700  | 2.92064800  | H | 4.63244500  | -5.33953900 | -0.30996000 |
| C | -0.90355300 | 1.78060900  | 3.99331000  | H | 5.66715000  | -4.89630600 | 1.05303400  |
| H | -0.26152400 | 0.90398400  | 4.04450700  | H | 6.21869100  | -4.61882900 | -0.61052300 |
| C | -0.84627700 | 2.75195800  | 4.98765500  | C | 3.10967500  | -0.98795400 | 2.64780100  |
| H | -0.14878700 | 2.64028700  | 5.81233200  | H | 2.07883300  | -1.28218400 | 2.86870300  |
| C | -1.68548900 | 3.86316100  | 4.92984600  | H | 3.18460300  | 0.08843300  | 2.78287200  |
| H | -1.64341000 | 4.62000500  | 5.70645800  | H | 3.74119300  | -1.46010100 | 3.40320000  |
| C | -2.57924400 | 3.99476900  | 3.87065100  | C | -2.48303400 | -0.61964700 | -0.92003000 |
| H | -3.23476400 | 4.85862000  | 3.81702100  | F | -3.43546900 | 1.52379700  | -0.43041900 |
| C | -2.63582900 | 3.02146800  | 2.87516700  | C | -3.56241500 | 0.27013400  | -0.87875100 |
| H | -3.32451500 | 3.12241400  | 2.04023600  | F | -5.82101600 | 0.85761300  | -1.21765700 |
| C | 3.46364200  | 2.12871600  | -0.58421700 | C | -4.84261300 | -0.04203400 | -1.32336200 |
| C | 4.55698600  | 2.44578400  | 0.25898700  | F | -6.31118200 | -1.58466100 | -2.33880400 |
| C | 5.41035800  | 3.49259500  | -0.09041500 | C | -5.09712500 | -1.27773900 | -1.89269200 |
| H | 6.24705900  | 3.71924700  | 0.56594300  | F | -4.25961300 | -3.36965900 | -2.57635500 |
| C | 5.23179800  | 4.25007400  | -1.24288600 | C | -4.05116300 | -2.17947000 | -2.01333200 |
| C | 4.15941500  | 3.92558400  | -2.06457400 | F | -1.85997600 | -2.78714500 | -1.69920000 |
| H | 3.99811300  | 4.49508500  | -2.97636000 | C | -2.79339700 | -1.83619700 | -1.53402700 |
| C | 3.27713800  | 2.88740900  | -1.76153800 | C | -0.02436500 | -1.54481200 | -0.05863400 |
| C | 4.87448500  | 1.71968700  | 1.54115500  | F | -0.34235300 | -1.42616100 | 2.32456000  |
| H | 5.80536000  | 2.10103000  | 1.96393000  | C | 0.15326800  | -2.04593900 | 1.23625300  |
| H | 4.99023400  | 0.64566700  | 1.38586300  | F | 1.03236100  | -3.54829000 | 2.83014800  |
| H | 4.09511500  | 1.87175400  | 2.29277100  | C | 0.86963300  | -3.19697000 | 1.55265900  |
| C | 6.15226800  | 5.39419600  | -1.57347100 | F | 2.23989000  | -4.98156500 | 0.84577400  |
| H | 7.16791700  | 5.19882800  | -1.22183800 | C | 1.49502200  | -3.91805300 | 0.55587700  |
| H | 5.80766600  | 6.31564500  | -1.09311100 | F | 1.99396600  | -4.12309600 | -1.73219300 |
| H | 6.18792600  | 5.57530200  | -2.64994100 | C | 1.37552500  | -3.47046300 | -0.74777300 |
| C | 2.16272400  | 2.63628500  | -2.74402800 | F | 0.62499100  | -1.99763400 | -2.32072000 |
| H | 2.20591800  | 3.35995400  | -3.55952600 | C | 0.64303900  | -2.32409100 | -1.01455300 |
| H | 1.17776200  | 2.73322700  | -2.28361900 | H | 0.75025600  | 0.57664900  | -1.14890700 |
| H | 2.23713800  | 1.63922800  | -3.18877200 | C | -3.24973300 | 3.42825100  | -3.57505900 |
| C | 3.30980700  | -0.77449300 | 0.05622800  | C | -3.22991700 | 2.10965400  | -4.02097000 |
| C | 3.80368700  | -1.33233300 | -1.14979700 | C | -2.29457600 | 1.21712500  | -3.51143800 |
| C | 4.49182800  | -2.54028500 | -1.12248800 | C | -1.36069700 | 1.60039600  | -2.53723700 |
| H | 4.84322800  | -2.96395400 | -2.05997100 | C | -1.39460700 | 2.93022200  | -2.10691700 |
| C | 4.70378300  | -3.23872000 | 0.06415200  | C | -2.32389300 | 3.83205900  | -2.62116400 |

|       |             |             |             |   |             |             |             |
|-------|-------------|-------------|-------------|---|-------------|-------------|-------------|
| H     | -3.98009400 | 4.12962900  | -3.96452700 | C | 3.68130100  | 1.91620100  | -0.76500100 |
| H     | -3.94496100 | 1.77155500  | -4.76436400 | C | 4.71176700  | 2.40164400  | 0.06995000  |
| H     | -2.29902900 | 0.18622900  | -3.85869200 | C | 5.53082700  | 3.42360700  | -0.40075200 |
| H     | -0.71308900 | 3.28929700  | -1.34665600 | H | 6.32595600  | 3.79385600  | 0.24129700  |
| H     | -2.32690100 | 4.85485100  | -2.25804300 | C | 5.35983800  | 3.98140100  | -1.66607600 |
| C     | -0.39756800 | 0.52987400  | -2.05547500 | C | 4.33476700  | 3.48905700  | -2.46900400 |
| H     | -0.65164800 | -0.40097700 | -2.55590900 | H | 4.18842900  | 3.91420700  | -3.45834200 |
| H     | 0.55693600  | 0.73283700  | -2.56792200 | C | 3.47997800  | 2.46846800  | -2.05129000 |
| P18_P |             |             |             | C | 4.95554400  | 1.86925800  | 1.46015800  |
| P     | 2.61096700  | 0.57556000  | -0.16912000 | H | 5.81504100  | 2.36826500  | 1.90981300  |
| Si    | -3.09809000 | 0.17685700  | 2.58443700  | H | 5.15296800  | 0.79368500  | 1.46128200  |
| B     | -1.25239000 | -0.23498000 | -0.64271700 | H | 4.09772400  | 2.05650500  | 2.11455300  |
| C     | 1.38480200  | 1.20896600  | 1.01796300  | C | 6.24119900  | 5.10556700  | -2.13903400 |
| H     | 1.04382400  | 0.37907400  | 1.63649000  | H | 7.24885500  | 5.01830600  | -1.72694200 |
| H     | 1.87694200  | 1.93987700  | 1.66633900  | H | 5.83372400  | 6.06932400  | -1.81734200 |
| C     | 0.16925100  | 1.82311200  | 0.26629900  | H | 6.31167300  | 5.12217600  | -3.22846200 |
| H     | 0.02166000  | 2.83851000  | 0.63840900  | C | 2.38577000  | 2.04437300  | -3.00424200 |
| H     | 0.39510100  | 1.91346900  | -0.79715000 | H | 2.53785200  | 2.52120500  | -3.97336400 |
| C     | -1.05723600 | 0.92987500  | 0.49840100  | H | 1.39650700  | 2.35036300  | -2.64895000 |
| C     | -1.74840200 | 1.15724000  | 1.64105700  | H | 2.35456500  | 0.96461300  | -3.17640300 |
| C     | -2.52323500 | 0.14331900  | 4.39126400  | C | 3.52184700  | -0.92445400 | 0.28608700  |
| H     | -3.25749900 | -0.41818100 | 4.97882700  | C | 4.10153100  | -1.63717800 | -0.79166600 |
| H     | -2.43008400 | 1.13963100  | 4.82915200  | C | 4.75494700  | -2.83688100 | -0.52808400 |
| H     | -1.56022300 | -0.36866000 | 4.49522300  | H | 5.18428300  | -3.38974000 | -1.35913700 |
| C     | -4.72356200 | 1.13554400  | 2.54846500  | C | 4.84891500  | -3.35693800 | 0.76083200  |
| H     | -5.17299900 | 1.16026100  | 1.55310300  | C | 4.27283400  | -2.63716900 | 1.80334800  |
| H     | -4.57457200 | 2.16813300  | 2.87872300  | H | 4.32591100  | -3.03475300 | 2.81343300  |
| H     | -5.43474600 | 0.66472500  | 3.23569900  | C | 3.60278300  | -1.43011400 | 1.60187000  |
| C     | -3.47779900 | -1.63504400 | 2.19649000  | C | 3.98574300  | -1.19219700 | -2.22906800 |
| H     | -3.80691300 | -2.09705100 | 3.13401700  | H | 4.61604600  | -1.81659200 | -2.86317600 |
| H     | -2.61730400 | -2.19755400 | 1.83237700  | H | 4.29720800  | -0.15295700 | -2.37106100 |
| H     | -4.29036300 | -1.74006000 | 1.47495300  | H | 2.95707800  | -1.30386500 | -2.59243500 |
| C     | -1.43301500 | 2.39026800  | 2.44203600  | C | 5.50081000  | -4.68812300 | 1.00838900  |
| C     | -0.46801200 | 2.40871700  | 3.45734500  | H | 4.76134600  | -5.48307400 | 0.87228800  |
| H     | 0.05501000  | 1.48707100  | 3.70526100  | H | 5.88838500  | -4.75918700 | 2.02662400  |
| C     | -0.18957000 | 3.57786500  | 4.16117600  | H | 6.31960800  | -4.86668100 | 0.30818700  |
| H     | 0.55947800  | 3.56980500  | 4.94770400  | C | 2.96978200  | -0.80025500 | 2.82050000  |
| C     | -0.87650900 | 4.75302900  | 3.86577400  | H | 1.92169600  | -1.10727200 | 2.91400500  |
| H     | -0.66271800 | 5.66381500  | 4.41587300  | H | 3.00978700  | 0.28889900  | 2.81867900  |
| C     | -1.84374900 | 4.74844700  | 2.86347400  | H | 3.48607800  | -1.14722900 | 3.71717500  |
| H     | -2.38440000 | 5.65969900  | 2.62628600  | C | -2.77484100 | -0.86475100 | -0.69858700 |
| C     | -2.12044900 | 3.57844800  | 2.16080000  | F | -3.78975700 | 1.27636000  | -0.40249300 |
| H     | -2.86253600 | 3.56846300  | 1.36596100  | C | -3.90049200 | -0.03797300 | -0.64602300 |
|       |             |             |             | F | -6.22513700 | 0.37302200  | -0.74577600 |

|        |             |             |             |   |             |             |             |
|--------|-------------|-------------|-------------|---|-------------|-------------|-------------|
| C      | -5.20371300 | -0.48257400 | -0.83210200 | C | 2.10439800  | 1.42495600  | -0.62451400 |
| F      | -6.68112500 | -2.26399900 | -1.30894100 | C | 3.29217000  | 2.16574800  | -0.59590100 |
| C      | -5.44042700 | -1.81874500 | -1.11369700 | C | 3.44319400  | 3.35422100  | -1.30410700 |
| F      | -4.55963800 | -3.97091700 | -1.48489700 | C | 2.40714100  | 3.83720100  | -2.09647400 |
| C      | -4.35858200 | -2.68102200 | -1.20422400 | C | 1.20341000  | 3.13924300  | -2.16894300 |
| F      | -2.09637400 | -3.11393700 | -1.10887300 | C | 0.02477600  | 3.52016300  | -3.05976700 |
| C      | -3.07301300 | -2.19224800 | -1.00169600 | C | 0.09020200  | 4.97190700  | -3.52976900 |
| C      | -0.11179400 | -1.45841400 | -0.36205800 | C | 0.03485400  | 2.58530300  | -4.29085100 |
| F      | -0.41310300 | -1.43092100 | 2.01565200  | B | 1.85952800  | 0.12324400  | 0.30924400  |
| C      | 0.12150600  | -1.99160600 | 0.91023500  | C | 1.14895800  | -1.19594600 | -0.34895200 |
| F      | 1.11897100  | -3.49232900 | 2.44504700  | C | 0.84053500  | -2.26766200 | 0.48637700  |
| C      | 0.92233000  | -3.09632400 | 1.18382500  | F | 0.99105600  | -2.13039600 | 1.82269600  |
| F      | 2.36020200  | -4.79440500 | 0.38730100  | C | 0.37580600  | -3.49544600 | 0.04433100  |
| C      | 1.57441400  | -3.74334300 | 0.15062900  | F | 0.04654600  | -4.46099000 | 0.90726100  |
| F      | 2.14453600  | -3.76145200 | -2.13171500 | C | 0.19189200  | -3.69121700 | -1.31568600 |
| C      | 1.44027800  | -3.23008700 | -1.12748900 | F | -0.29139500 | -4.84754100 | -1.76927700 |
| F      | 0.65035500  | -1.69101200 | -2.62606900 | C | 0.48244700  | -2.66006400 | -2.19269200 |
| C      | 0.63238200  | -2.12062200 | -1.34585000 | C | 0.97017000  | -1.45182700 | -1.70587200 |
| C      | -3.95817600 | 3.39361000  | -3.29288300 | F | 1.26020400  | -0.53453700 | -2.63746200 |
| C      | -4.12865500 | 2.06352300  | -3.66522500 | F | 0.25110700  | -2.82013400 | -3.49699800 |
| C      | -3.16602200 | 1.11577200  | -3.33272800 | C | 3.33812500  | -0.47238900 | 0.78817400  |
| C      | -2.02002400 | 1.45664100  | -2.60226200 | C | 4.17126400  | -0.87654400 | -0.26302700 |
| C      | -1.85903600 | 2.80371100  | -2.25351000 | F | 3.75763200  | -0.72826400 | -1.52930300 |
| C      | -2.81181000 | 3.75942500  | -2.59342500 | C | 5.42799300  | -1.43906400 | -0.10076300 |
| H      | -4.70650600 | 4.13666000  | -3.54899300 | F | 6.16013100  | -1.79134700 | -1.15673500 |
| H      | -5.01287400 | 1.76153500  | -4.21858200 | C | 5.92062500  | -1.64373900 | 1.18073700  |
| H      | -3.30843500 | 0.07795500  | -3.62643500 | F | 7.12251300  | -2.18391500 | 1.36500900  |
| H      | -0.98177500 | 3.12085100  | -1.69699900 | C | 5.13819200  | -1.27815700 | 2.26068500  |
| H      | -2.65968100 | 4.79518200  | -2.30368700 | C | 3.88185200  | -0.71632100 | 2.04510600  |
| C      | -1.05324600 | 0.37693800  | -2.19277200 | F | 3.21691000  | -0.41705000 | 3.18487300  |
| H      | -1.18871300 | -0.45803800 | -2.88502800 | F | 5.58380700  | -1.46965800 | 3.50284000  |
| H      | -0.02455400 | 0.71996200  | -2.36491700 | C | -3.57281500 | 0.31029900  | 1.45898300  |
| H      | 1.86181100  | 0.19884200  | -1.28489100 | C | -3.42092700 | 0.74222100  | 2.79195500  |
|        |             |             |             | C | -2.09015700 | 1.14879400  | 3.37149400  |
|        |             |             |             | C | -4.52871900 | 0.77460100  | 3.63810200  |
| P21_TS |             |             |             | C | -5.79489000 | 0.39147300  | 3.20763200  |
| P      | -2.08516100 | 0.22353000  | 0.35505200  | C | -6.97148700 | 0.39907900  | 4.14696100  |
| C      | -2.35477000 | 1.65422800  | -0.74968000 | C | -5.93393900 | -0.00956400 | 1.88280600  |
| C      | -3.50941600 | 2.44288400  | -0.78753300 | C | -4.85710500 | -0.06120800 | 0.99473700  |
| C      | -3.53266200 | 3.60302700  | -1.55337900 | C | -5.17132700 | -0.51236400 | -0.41460700 |
| C      | -2.40996100 | 3.99320400  | -2.28351300 | C | -2.33645400 | -1.40997100 | -0.46936400 |
| C      | -1.24052900 | 3.23701600  | -2.26111600 | C | -2.47668400 | -1.63067000 | -1.85690000 |
| C      | -1.24272400 | 2.08419700  | -1.47543900 | C | -2.21407800 | -0.58536900 | -2.91208600 |
| O      | -0.12848100 | 1.31220800  | -1.36921700 | C | -2.84965200 | -2.90070600 | -2.29653700 |
| C      | 1.09685900  | 1.97662400  | -1.40744700 |   |             |             |             |

|   |             |             |             |       |             |             |             |
|---|-------------|-------------|-------------|-------|-------------|-------------|-------------|
| C | -3.07277700 | -3.96381400 | -1.42294000 | C     | 2.17645100  | 2.58103400  | 2.84000500  |
| C | -3.44641200 | -5.32508300 | -1.94333800 | C     | 2.41841000  | 3.93238900  | 3.07206400  |
| C | -2.85393700 | -3.74368000 | -0.06791900 | H     | 1.80039100  | 5.95545200  | 2.66759700  |
| C | -2.47263200 | -2.49384000 | 0.42406500  | H     | -0.08855100 | 5.25266700  | 1.20790300  |
| C | -2.19381900 | -2.39634400 | 1.90747700  | H     | -0.50706700 | 2.87303200  | 0.78688000  |
| H | -4.37784800 | 2.16403500  | -0.20069600 | H     | 2.81576000  | 1.82977600  | 3.29271800  |
| H | -4.42939600 | 4.21241800  | -1.57693500 | H     | 3.24656800  | 4.22621700  | 3.70944100  |
| H | -2.45046100 | 4.90288400  | -2.87336900 | C     | 0.92121800  | 0.71280400  | 1.72220700  |
| H | 4.11659400  | 1.81722900  | 0.01940400  | H     | -0.00231200 | 0.37937500  | 2.24052500  |
| H | 4.37599000  | 3.90523600  | -1.24285500 | H     | 1.51552300  | 0.09050500  | 2.39326700  |
| H | 2.53910100  | 4.75799900  | -2.65437100 |       |             |             |             |
| H | 0.99914200  | 5.14077400  | -4.11182700 | P21_P |             |             |             |
| H | 0.08112900  | 5.66844200  | -2.68601500 | P     | -2.39109000 | -0.26653700 | -0.26843200 |
| H | -0.75359400 | 5.20125900  | -4.18633200 | C     | -2.45019300 | -1.65599800 | 0.87272400  |
| H | 0.93799100  | 2.76433700  | -4.88170300 | C     | -3.62132800 | -2.41607700 | 0.98748700  |
| H | 0.03715600  | 1.53557800  | -3.98375100 | C     | -3.65572600 | -3.49712400 | 1.85327700  |
| H | -0.84359100 | 2.76960800  | -4.91781400 | C     | -2.53094700 | -3.81020700 | 2.61881700  |
| H | -2.22780100 | 1.64825600  | 4.33207900  | C     | -1.35530000 | -3.07199200 | 2.53037700  |
| H | -1.46493600 | 0.26706100  | 3.56033900  | C     | -1.31768100 | -2.00733900 | 1.62063600  |
| H | -1.54037800 | 1.83895600  | 2.72586000  | O     | -0.21062400 | -1.25597700 | 1.46145300  |
| H | -4.39368200 | 1.11111200  | 4.66320000  | C     | 1.04165500  | -1.86881500 | 1.69995300  |
| H | -7.04719400 | -0.55596800 | 4.67683100  | C     | 2.12604200  | -1.35238400 | 0.99157500  |
| H | -6.87282600 | 1.18602000  | 4.89815900  | C     | 3.33387900  | -2.02561600 | 1.20904100  |
| H | -7.90842700 | 0.55247800  | 3.60691200  | C     | 3.43813600  | -3.12404000 | 2.05597100  |
| H | -6.91887300 | -0.29055400 | 1.51680800  | C     | 2.32534600  | -3.57674400 | 2.75461000  |
| H | -6.22485700 | -0.31946200 | -0.62951100 | C     | 1.09695200  | -2.93386100 | 2.59807100  |
| H | -4.99139800 | -1.58538000 | -0.53655500 | C     | -0.14106200 | -3.25364900 | 3.42763100  |
| H | -4.57589000 | 0.00497100  | -1.16879900 | C     | -0.09301500 | -4.64818300 | 4.04963300  |
| H | -2.28358000 | -1.03971400 | -3.90195500 | C     | -0.23289000 | -2.19936800 | 4.55588000  |
| H | -1.20725800 | -0.17202000 | -2.80609000 | B     | 1.95332800  | -0.22517000 | -0.17438300 |
| H | -2.92575200 | 0.24480900  | -2.86953000 | C     | 1.08785200  | 1.11939400  | 0.31532200  |
| H | -2.95595400 | -3.06570200 | -3.36600700 | C     | 0.75438900  | 2.10968900  | -0.61155000 |
| H | -4.10721100 | -5.25024800 | -2.81022300 | F     | 0.97910700  | 1.91437200  | -1.92643800 |
| H | -3.94629500 | -5.92014000 | -1.17601000 | C     | 0.21341900  | 3.34628000  | -0.28608900 |
| H | -2.54534000 | -5.86244800 | -2.25350400 | F     | -0.11946700 | 4.22563300  | -1.23976600 |
| H | -2.95375200 | -4.56983100 | 0.63227700  | C     | -0.03193000 | 3.65217300  | 1.04187600  |
| H | -1.80362600 | -3.35229600 | 2.26304600  | F     | -0.57040200 | 4.82711100  | 1.37950900  |
| H | -1.43308000 | -1.64384700 | 2.13878800  | C     | 0.25904000  | 2.70524900  | 2.00719400  |
| H | -3.09517400 | -2.15047300 | 2.47775500  | C     | 0.82337900  | 1.48840200  | 1.63645800  |
| H | -0.33139500 | 0.42635800  | 1.01977300  | F     | 1.09944700  | 0.67494300  | 2.66845300  |
| C | 1.60777400  | 4.90238200  | 2.49034600  | F     | -0.03659900 | 2.95395600  | 3.28736200  |
| C | 0.54962100  | 4.50928100  | 1.67569000  | C     | 3.39763900  | 0.46770800  | -0.56057100 |
| C | 0.31247400  | 3.15886300  | 1.44172200  | C     | 4.21921800  | 0.95255400  | 0.45921600  |
| C | 1.12092300  | 2.17433300  | 2.01911700  | F     | 3.84540300  | 0.80530400  | 1.74104800  |

|   |             |             |             |        |             |             |             |
|---|-------------|-------------|-------------|--------|-------------|-------------|-------------|
| C | 5.41968900  | 1.61471200  | 0.24461400  | H      | -6.42723000 | -2.22669000 | -5.10921500 |
| F | 6.16522100  | 2.03892500  | 1.26826700  | H      | -6.93357700 | -0.05688300 | -2.22382800 |
| C | 5.83639200  | 1.85400200  | -1.05732600 | H      | -6.57125800 | 0.44210900  | -0.02248500 |
| F | 6.98393300  | 2.49089900  | -1.29298000 | H      | -5.24750200 | 1.61485300  | -0.09714900 |
| C | 5.03723200  | 1.43531800  | -2.10773300 | H      | -5.05771200 | 0.12715300  | 0.82661500  |
| C | 3.84272400  | 0.77267100  | -1.84128000 | H      | -2.59942700 | 1.26207600  | 3.81541600  |
| F | 3.11223900  | 0.45839900  | -2.92216700 | H      | -1.50013100 | 0.34643400  | 2.78294100  |
| F | 5.41258000  | 1.68184200  | -3.36548200 | H      | -3.21509500 | -0.09719800 | 2.86420400  |
| C | -3.66148700 | -0.58474800 | -1.52286700 | H      | -3.28032000 | 3.26943100  | 3.11731100  |
| C | -3.28198100 | -1.28892400 | -2.68582100 | H      | -4.19711100 | 5.94496700  | 0.70410500  |
| C | -1.89076800 | -1.83494500 | -2.89579500 | H      | -2.77295000 | 5.97521200  | 1.75199700  |
| C | -4.24184700 | -1.49478300 | -3.67380200 | H      | -4.32443000 | 5.42274400  | 2.39594600  |
| C | -5.55207600 | -1.03840500 | -3.53878400 | H      | -3.09862000 | 4.48595900  | -0.97709300 |
| C | -6.55498200 | -1.24766600 | -4.64143700 | H      | -2.00818800 | 3.13708600  | -2.51119000 |
| C | -5.90649300 | -0.38647900 | -2.36005000 | H      | -1.52714200 | 1.48161700  | -2.21463500 |
| C | -4.98880400 | -0.14808100 | -1.33686000 | H      | -3.21189100 | 1.83904200  | -2.63991700 |
| C | -5.48646600 | 0.54661700  | -0.08868700 | H      | -1.15207200 | -0.31595200 | -0.91170000 |
| C | -2.59808300 | 1.41253700  | 0.37124900  | C      | 2.93545500  | -4.51221300 | -3.30432200 |
| C | -2.77735900 | 1.71982400  | 1.73582500  | C      | 2.48731700  | -4.57212700 | -1.98745100 |
| C | -2.51718000 | 0.74566200  | 2.85794400  | C      | 1.93040500  | -3.45121200 | -1.38007200 |
| C | -3.14694400 | 3.02117900  | 2.06758900  | C      | 1.81740400  | -2.22949800 | -2.06247500 |
| C | -3.31843700 | 4.01781500  | 1.10704800  | C      | 2.24696200  | -2.19937400 | -3.39544400 |
| C | -3.68364800 | 5.41873400  | 1.51149600  | C      | 2.80260200  | -3.31960800 | -4.00761400 |
| C | -3.04772900 | 3.70494400  | -0.22259600 | H      | 3.37095800  | -5.38639700 | -3.77829800 |
| C | -2.67530500 | 2.42064600  | -0.61571700 | H      | 2.56499700  | -5.49944000 | -1.42706100 |
| C | -2.34551200 | 2.19599600  | -2.07420400 | H      | 1.56855100  | -3.52997800 | -0.35869100 |
| H | -4.48791200 | -2.17262200 | 0.38155500  | H      | 2.14376400  | -1.28067200 | -3.96207400 |
| H | -4.55534600 | -4.09604500 | 1.93673300  | H      | 3.12971000  | -3.25757100 | -5.04154600 |
| H | -2.58019200 | -4.64903700 | 3.30499700  | C      | 1.17428100  | -1.02358800 | -1.41364600 |
| H | 4.21556300  | -1.69694200 | 0.66624600  | H      | 0.26254000  | -1.41003700 | -0.93949000 |
| H | 4.39219300  | -3.62715800 | 2.17723100  | H      | 0.87092300  | -0.32382100 | -2.19957100 |
| H | 2.41781400  | -4.42188000 | 3.42778400  |        |             |             |             |
| H | 0.77475600  | -4.73723800 | 4.70630100  | P22_TS |             |             |             |
| H | -0.03430500 | -5.42866800 | 3.28530200  | P      | -2.74421400 | 1.81280700  | 0.91265100  |
| H | -0.97483700 | -4.82529100 | 4.67154000  | C      | -3.70116500 | 0.89138800  | -0.34223100 |
| H | 0.62488400  | -2.30612800 | 5.22637100  | C      | -4.93979100 | 1.33849600  | -0.81923700 |
| H | -0.20836700 | -1.18597800 | 4.14447500  | C      | -5.67090600 | 0.58199300  | -1.72402700 |
| H | -1.15541800 | -2.33065600 | 5.13161700  | C      | -5.19388700 | -0.66399800 | -2.12505500 |
| H | -1.86537400 | -2.47243800 | -3.78032900 | C      | -3.97554100 | -1.15314200 | -1.66207500 |
| H | -1.15112300 | -1.04080000 | -3.04439600 | C      | -3.21569400 | -0.33746900 | -0.81461900 |
| H | -1.54914900 | -2.43857800 | -2.04778600 | O      | -1.97345200 | -0.75648800 | -0.40438100 |
| H | -3.95638700 | -2.03615900 | -4.57218200 | C      | -1.23504100 | -1.55923200 | -1.29352300 |
| H | -7.57806000 | -1.17268700 | -4.26758000 | C      | 0.15883700  | -1.43242900 | -1.30113400 |
| H | -6.42736800 | -0.49082300 | -5.42188400 | C      | 0.83340600  | -2.27931700 | -2.19449900 |



|   |             |             |             |       |             |             |             |
|---|-------------|-------------|-------------|-------|-------------|-------------|-------------|
| C | 0.16887400  | -3.15614200 | -3.03940700 | H     | -3.77244500 | -4.24221800 | -3.24012200 |
| C | -1.21877200 | -3.23639700 | -3.00196900 | H     | -5.21868000 | -3.30301500 | -2.92603800 |
| C | -1.94148500 | -2.44731300 | -2.11206000 | H     | -3.98131800 | -2.66884900 | -4.03650700 |
| C | -3.44880000 | -2.55606800 | -1.92192700 | H     | -4.02412000 | 3.84377800  | 0.42134600  |
| C | -3.71455500 | -3.39707500 | -0.65111200 | H     | -2.39610800 | 4.93645000  | -1.10790600 |
| C | -4.14367600 | -3.22361600 | -3.10767400 | H     | -2.66275400 | 3.26627100  | -1.63786600 |
| B | 1.08398300  | -0.50111200 | -0.33499100 | H     | -1.18641700 | 3.69832500  | -0.74545100 |
| C | 1.45273800  | -1.42181000 | 0.97187300  | H     | -2.38255400 | 5.50200900  | 1.37497600  |
| C | 2.53028800  | -2.30747900 | 0.92602700  | H     | -1.28140200 | 4.17307800  | 1.77369100  |
| F | 3.33786700  | -2.32569200 | -0.14425400 | H     | -2.85604800 | 4.30242200  | 2.58419300  |
| C | 2.84067300  | -3.20446400 | 1.93706500  | H     | -3.01824000 | 1.97437800  | 3.27013500  |
| F | 3.89119200  | -4.01549400 | 1.82860900  | H     | -5.49952800 | 1.92568000  | 3.54106300  |
| C | 2.03743400  | -3.26728900 | 3.06815000  | H     | -5.04358200 | 3.18868300  | 2.39207700  |
| F | 2.31526300  | -4.12598200 | 4.04531000  | H     | -5.69952700 | 1.64421100  | 1.80857500  |
| C | 0.94012100  | -2.42866700 | 3.15796000  | H     | -4.14006200 | -0.20083600 | 3.75310400  |
| C | 0.67292100  | -1.55365800 | 2.11314800  | H     | -4.30560500 | -0.51234100 | 2.01893300  |
| F | -0.44933600 | -0.80118000 | 2.27535500  | H     | -2.69582200 | -0.45809800 | 2.75964100  |
| F | 0.13931000  | -2.47622300 | 4.22366000  | H     | -1.02177500 | 1.29398300  | 0.54471600  |
| C | 2.35458500  | 0.17377800  | -1.09033300 | C     | 2.33161600  | 4.01218400  | 2.26365500  |
| C | 3.56833400  | 0.47001100  | -0.47291100 | C     | 1.67904700  | 2.99187400  | 2.95006400  |
| F | 3.79620500  | 0.10328600  | 0.79389800  | C     | 0.98751700  | 2.00455800  | 2.25327400  |
| C | 4.59265500  | 1.17681300  | -1.09095800 | C     | 0.94588100  | 2.02088100  | 0.85455700  |
| F | 5.73294500  | 1.42446000  | -0.44699000 | C     | 1.59850900  | 3.05458100  | 0.17294400  |
| C | 4.41720500  | 1.64560500  | -2.38363300 | C     | 2.28786300  | 4.04025300  | 0.87177400  |
| F | 5.38287500  | 2.33337800  | -2.98877200 | H     | 2.87123900  | 4.77981100  | 2.80826100  |
| C | 3.21548500  | 1.40556100  | -3.03333500 | H     | 1.70755000  | 2.96139100  | 4.03473200  |
| C | 2.21932600  | 0.69304400  | -2.37788200 | H     | 0.47370900  | 1.21482700  | 2.79358300  |
| F | 1.05386500  | 0.57345400  | -3.03518200 | H     | 1.57197500  | 3.07511700  | -0.91469900 |
| F | 3.02050500  | 1.87284800  | -4.26750200 | H     | 2.79413300  | 4.83075400  | 0.32687700  |
| C | -2.95675000 | 3.60527400  | 0.50563700  | C     | 0.17531100  | 0.99839900  | 0.10067700  |
| C | -2.26309600 | 3.88662200  | -0.83054300 | H     | -0.35569300 | 0.20207100  | 0.62999300  |
| C | -2.33598100 | 4.43938900  | 1.63131800  | H     | -0.12860300 | 1.23026700  | -0.91985000 |
| C | -3.65144000 | 1.49929700  | 2.50973900  |       |             |             |             |
| C | -5.05141300 | 2.10761200  | 2.55898200  | P22_P |             |             |             |
| C | -3.69170100 | -0.00916000 | 2.77372900  | P     | 3.11703700  | 0.77622100  | 1.30231100  |
| H | -5.32741200 | 2.29614600  | -0.48375700 | C     | 3.65244800  | -0.87019700 | 0.74023400  |
| H | -6.61985200 | 0.94821000  | -2.10014000 | C     | 4.91032900  | -1.39222500 | 1.03853400  |
| H | -5.78941100 | -1.26542800 | -2.80307700 | C     | 5.30123300  | -2.59661200 | 0.45576600  |
| H | 1.91866400  | -2.23153800 | -2.22819500 | C     | 4.44679500  | -3.23358100 | -0.44389800 |
| H | 0.73038800  | -3.77972300 | -3.72746400 | C     | 3.18176000  | -2.72633300 | -0.76385800 |
| H | -1.73470800 | -3.92479500 | -3.66190000 | C     | 2.77828500  | -1.55480100 | -0.12016800 |
| H | -3.31197200 | -4.40558000 | -0.78385200 | O     | 1.54519200  | -0.97884400 | -0.29802300 |
| H | -4.79041800 | -3.46534200 | -0.46017400 | C     | 0.59298900  | -1.55586700 | -1.19004400 |
| H | -3.23249400 | -2.94775700 | 0.22160200  | C     | -0.68122100 | -0.96766200 | -1.19566700 |

|   |             |             |             |        |             |             |             |
|---|-------------|-------------|-------------|--------|-------------|-------------|-------------|
| C | -1.52295200 | -1.42630600 | -2.22261100 | H      | 3.31006100  | -2.36471900 | -3.47113100 |
| C | -1.16215100 | -2.44958200 | -3.09446400 | H      | 1.40171500  | -5.34092100 | -2.16284400 |
| C | 0.06993600  | -3.07586100 | -2.95246000 | H      | 2.92836400  | -5.41454300 | -1.26602400 |
| C | 0.98347900  | -2.63565400 | -1.99014500 | H      | 1.44275600  | -4.85800000 | -0.45887500 |
| C | 2.30726400  | -3.38740800 | -1.82212600 | H      | 4.74101500  | 1.03630700  | 3.09924300  |
| C | 3.08537700  | -3.38869600 | -3.15940200 | H      | 3.24159300  | 0.44877800  | 5.03034300  |
| C | 2.00333400  | -4.84347500 | -1.39775100 | H      | 3.16871500  | -0.81678500 | 3.79150000  |
| B | -1.20234800 | 0.12835700  | -0.07595700 | H      | 1.85076200  | 0.36395400  | 3.93708500  |
| C | -0.50797700 | 1.58937800  | -0.47097500 | H      | 3.51381800  | 2.88689100  | 4.36352400  |
| C | -0.61767500 | 2.06884000  | -1.78177100 | H      | 2.25180900  | 2.85867500  | 3.11942700  |
| F | -1.37093300 | 1.37668400  | -2.69988600 | H      | 3.90331300  | 3.34359500  | 2.69958400  |
| C | -0.04635600 | 3.24818800  | -2.23659200 | H      | 3.24949800  | 2.99178700  | 0.36906600  |
| F | -0.18437700 | 3.63881000  | -3.54060000 | H      | 5.58930500  | 2.91146100  | -0.57271700 |
| C | 0.67819900  | 4.04123500  | -1.35949200 | H      | 5.58517700  | 2.48006200  | 1.14150200  |
| F | 1.29203800  | 5.18583500  | -1.79161700 | H      | 5.72124100  | 1.21218000  | -0.10272700 |
| C | 0.77607800  | 3.64313200  | -0.04064200 | H      | 3.48892100  | 2.46101800  | -2.04162600 |
| C | 0.18046600  | 2.45730700  | 0.36954300  | H      | 3.76887000  | 0.74734600  | -1.67882200 |
| F | 0.33376500  | 2.19261500  | 1.73257400  | H      | 2.17435900  | 1.46161200  | -1.38746800 |
| F | 1.52091600  | 4.38683500  | 0.85199500  | H      | 1.71282000  | 0.75620500  | 1.33494800  |
| C | -2.84944900 | 0.29515300  | -0.08881300 | C      | -2.66196500 | -4.06327800 | 2.64033600  |
| C | -3.49699800 | 1.51653700  | 0.11096800  | C      | -3.27425300 | -2.85356800 | 2.96820200  |
| F | -2.78074100 | 2.69896600  | 0.19183400  | C      | -2.66598600 | -1.64584600 | 2.62666500  |
| C | -4.86892600 | 1.65934600  | 0.27196400  | C      | -1.44686600 | -1.61843200 | 1.93375500  |
| F | -5.42351100 | 2.89830300  | 0.46515100  | C      | -0.83255500 | -2.84302100 | 1.63400300  |
| C | -5.67935100 | 0.53920400  | 0.24558800  | C      | -1.43223500 | -4.05220200 | 1.97965300  |
| F | -7.03302100 | 0.65428400  | 0.41233100  | H      | -3.13566600 | -5.00335700 | 2.89917100  |
| C | -5.09568200 | -0.70169600 | 0.06005400  | H      | -4.22539800 | -2.85006400 | 3.48966900  |
| C | -3.72034400 | -0.80226200 | -0.09814400 | H      | -3.14574000 | -0.70511900 | 2.88508700  |
| F | -3.24591900 | -2.08441300 | -0.25541700 | H      | 0.12101800  | -2.83964400 | 1.11249700  |
| F | -5.88214600 | -1.82365000 | 0.05016800  | H      | -0.94429000 | -4.98824500 | 1.72806800  |
| C | 3.65685400  | 1.18723700  | 3.04411500  | C      | -0.84298700 | -0.31376900 | 1.49025300  |
| C | 2.93610800  | 0.23072500  | 4.00334200  | H      | -1.18963200 | 0.48537800  | 2.15559700  |
| C | 3.31058200  | 2.65940400  | 3.31345100  | H      | 0.24559700  | -0.38351800 | 1.60657600  |
| C | 3.71977200  | 2.05151100  | 0.06144700  |        |             |             |             |
| C | 5.24500100  | 2.16600000  | 0.14957400  | P23-TS |             |             |             |
| C | 3.25086700  | 1.65261200  | -1.34364800 | C      | 1.42336900  | 3.00008100  | -1.34930900 |
| H | 5.57834200  | -0.86562400 | 1.71278300  | H      | 2.49922500  | 3.15368700  | -1.46618100 |
| H | 6.26904600  | -3.02435000 | 0.68407900  | H      | 1.02354200  | 3.89501600  | -0.86477400 |
| H | 4.77568400  | -4.14994200 | -0.92239500 | H      | 0.97168500  | 2.92675200  | -2.34318300 |
| H | -2.49566300 | -0.96500000 | -2.33621800 | C      | 1.13044700  | 1.75931600  | -0.54168400 |
| H | -1.85142700 | -2.77521600 | -3.86452600 | C      | 0.01264600  | 0.99596700  | -0.58726200 |
| H | 0.32736900  | -3.91183700 | -3.59432200 | P      | 2.32816800  | 1.15148700  | 0.66321400  |
| H | 2.49362600  | -3.86489500 | -3.94483100 | C      | 3.73361900  | 0.34573700  | -0.15973500 |
| H | 4.02567600  | -3.94106700 | -3.06336600 | C      | 4.04465100  | 0.57208100  | -1.50494400 |

|   |             |             |             |       |             |             |             |
|---|-------------|-------------|-------------|-------|-------------|-------------|-------------|
| H | 3.46330000  | 1.27500100  | -2.09181200 | F     | -1.29854200 | -3.17489900 | -0.22193800 |
| C | 5.06941600  | -0.14803200 | -2.10878600 | C     | -2.15140000 | -2.19444200 | 0.09964300  |
| H | 5.29288400  | 0.01326200  | -3.15789800 | F     | -3.84296400 | -3.84535600 | 0.05537500  |
| C | 5.78665700  | -1.09432900 | -1.37952600 | C     | -3.48015000 | -2.57754900 | 0.24621700  |
| H | 6.57349500  | -1.66578900 | -1.86065200 | F     | -5.70189500 | -1.99348100 | 0.76373200  |
| C | 5.48338600  | -1.32006000 | -0.03949700 | C     | -4.43153600 | -1.63662200 | 0.60520900  |
| H | 6.02941900  | -2.06880300 | 0.52510100  | F     | -4.94697300 | 0.59732700  | 1.15377200  |
| C | 4.45430800  | -0.60672600 | 0.56946100  | C     | -4.04665900 | -0.31685000 | 0.79905900  |
| H | 4.19358600  | -0.80793200 | 1.60597200  | F     | -2.39535500 | 1.31011800  | 0.84933000  |
| C | 2.94634600  | 2.62729000  | 1.52595600  | C     | -2.71612000 | 0.02370300  | 0.62669100  |
| C | 4.29716500  | 2.80169400  | 1.83476000  | H     | 1.08315700  | 0.22324300  | 1.33545300  |
| H | 5.02754400  | 2.06489600  | 1.51293000  | C     | -3.68443800 | -0.73317300 | 4.27249600  |
| C | 4.70592500  | 3.92788600  | 2.54388600  | C     | -3.19691000 | 0.55774600  | 4.09485600  |
| H | 5.75693300  | 4.06378500  | 2.77709100  | C     | -1.96023700 | 0.75761900  | 3.48905200  |
| C | 3.77288000  | 4.87884300  | 2.94711600  | C     | -1.19458700 | -0.31945200 | 3.03107100  |
| H | 4.09522000  | 5.75609500  | 3.49844700  | C     | -1.67914200 | -1.61503400 | 3.24979400  |
| C | 2.42427700  | 4.70696700  | 2.64103800  | C     | -2.91342400 | -1.81772400 | 3.85691800  |
| H | 1.69584800  | 5.44886300  | 2.95150400  | H     | -4.65224400 | -0.89433000 | 4.73609700  |
| C | 2.00815400  | 3.58454000  | 1.93430900  | H     | -3.78013300 | 1.41262100  | 4.42187400  |
| H | 0.95602600  | 3.45590700  | 1.68486600  | H     | -1.59450300 | 1.76926400  | 3.33559100  |
| B | -0.18261100 | -0.40878900 | 0.24490200  | H     | -1.09974300 | -2.46833200 | 2.91830600  |
| C | -1.06480900 | 1.39272400  | -1.53781500 | H     | -3.27760700 | -2.83028400 | 4.00185400  |
| F | -1.25543500 | 3.53715300  | -0.55647200 | C     | 0.12739400  | -0.04187100 | 2.36115600  |
| C | -1.64804400 | 2.65934800  | -1.48399400 | H     | 0.39051200  | 0.98663500  | 2.64023300  |
| F | -3.19564200 | 4.26856100  | -2.24984400 | H     | 0.88810200  | -0.71133700 | 2.77542400  |
| C | -2.67074900 | 3.04877500  | -2.33535100 |       |             |             |             |
| F | -4.13541100 | 2.50798000  | -4.09729700 | P23_P |             |             |             |
| C | -3.15995900 | 2.14817600  | -3.27172900 | C     | -1.62401100 | -3.12371600 | -0.74455000 |
| F | -3.09972500 | -0.00292100 | -4.22224100 | H     | -0.74604700 | -3.58787400 | -1.19272700 |
| C | -2.62823300 | 0.86847800  | -3.33485800 | H     | -2.43889400 | -3.18243700 | -1.47226400 |
| F | -1.16583300 | -0.75315300 | -2.54675600 | H     | -1.91075600 | -3.72042000 | 0.13019300  |
| C | -1.60761900 | 0.50290900  | -2.46699000 | C     | -1.32773400 | -1.68843500 | -0.35956300 |
| C | 0.91857300  | -1.52521700 | -0.21690300 | C     | -0.12413900 | -1.07111700 | -0.35564500 |
| F | 1.35400700  | -0.53006000 | -2.35336100 | P     | -2.82343800 | -0.82088900 | 0.12821200  |
| C | 1.58698300  | -1.48659600 | -1.44314600 | C     | -4.23784400 | -1.17384800 | -0.94192100 |
| F | 3.18814300  | -2.27278100 | -2.99222100 | C     | -4.98575000 | -2.33537500 | -0.71097600 |
| C | 2.58247000  | -2.38793300 | -1.81027800 | H     | -4.72399000 | -3.00103900 | 0.10707100  |
| F | 3.95340600  | -4.21824700 | -1.24578200 | C     | -6.07377400 | -2.62988500 | -1.52265300 |
| C | 2.96935900  | -3.38198200 | -0.93178500 | H     | -6.65010400 | -3.53126100 | -1.34421600 |
| F | 2.65979000  | -4.45013900 | 1.14506800  | C     | -6.42460400 | -1.76289400 | -2.55556100 |
| C | 2.31937500  | -3.48626700 | 0.29022800  | H     | -7.27876200 | -1.99090800 | -3.18478000 |
| F | 0.71098700  | -2.78099800 | 1.78472900  | C     | -5.68624300 | -0.60484900 | -2.78068800 |
| C | 1.31479200  | -2.58436200 | 0.60231500  | H     | -5.96126400 | 0.07050600  | -3.58350600 |
| C | -1.71196400 | -0.88874200 | 0.29839300  | C     | -4.58755600 | -0.30397100 | -1.97987900 |

|   |             |             |             |       |             |             |             |
|---|-------------|-------------|-------------|-------|-------------|-------------|-------------|
| H | -4.00804100 | 0.59139100  | -2.17841100 | F     | 2.08398600  | -1.07319500 | 1.95161800  |
| C | -3.30218700 | -1.32586700 | 1.79678000  | C     | 2.71430400  | -0.28380200 | 1.05395800  |
| C | -4.55921300 | -0.96698700 | 2.29509600  | H     | -2.65016400 | 0.56454300  | 0.09803500  |
| H | -5.25824000 | -0.41144400 | 1.67545200  | C     | 0.84059100  | 4.10271900  | 3.96919200  |
| C | -4.91323300 | -1.33128200 | 3.58816300  | C     | 1.67687200  | 2.98891400  | 3.95600600  |
| H | -5.88322700 | -1.04752200 | 3.98193500  | C     | 1.31030300  | 1.84257500  | 3.25912000  |
| C | -4.02150000 | -2.05960400 | 4.37446200  | C     | 0.10245400  | 1.78521000  | 2.55630400  |
| H | -4.30146400 | -2.34388600 | 5.38352600  | C     | -0.74121100 | 2.89985900  | 2.60568500  |
| C | -2.77504400 | -2.42309900 | 3.87374400  | C     | -0.37582500 | 4.05165600  | 3.29487900  |
| H | -2.08345500 | -2.98922900 | 4.48794400  | H     | 1.13033400  | 4.99836900  | 4.50919600  |
| C | -2.40567600 | -2.05439400 | 2.58294600  | H     | 2.62000800  | 3.01250500  | 4.49373400  |
| H | -1.42728400 | -2.32212500 | 2.19125000  | H     | 1.95891600  | 0.97126200  | 3.26620200  |
| B | 0.32031600  | 0.46624500  | 0.18834700  | H     | -1.69360700 | 2.86552100  | 2.07890100  |
| C | 1.02269800  | -1.94249600 | -0.75094400 | H     | -1.04230600 | 4.90882100  | 3.30861400  |
| F | 0.70878600  | -3.39313800 | 1.08714400  | C     | -0.27706100 | 0.57404400  | 1.75072500  |
| C | 1.43879700  | -3.01435100 | 0.03079800  | H     | 0.01809800  | -0.32713300 | 2.29562800  |
| F | 2.98936900  | -4.72185100 | 0.53954300  | H     | -1.37239600 | 0.56136000  | 1.72673400  |
| C | 2.61467100  | -3.70462100 | -0.23115400 |       |             |             |             |
| F | 4.52376500  | -3.98068800 | -1.57765000 | P24_P |             |             |             |
| C | 3.39982500  | -3.32615100 | -1.31180200 | P     | 2.16441900  | -0.48012400 | 0.37196800  |
| F | 3.75746900  | -1.90670200 | -3.15594600 | B     | -0.97131300 | 0.83872100  | 0.77893600  |
| C | 3.00396900  | -2.26752000 | -2.12218800 | C     | 0.66371700  | -0.98086600 | -0.52616200 |
| F | 1.47153500  | -0.56501900 | -2.60069800 | C     | -0.56168800 | -0.45907900 | -0.22767800 |
| C | 1.82279100  | -1.60043100 | -1.83793600 | C     | 3.12978100  | -1.95874400 | 0.81998500  |
| C | -0.30874200 | 1.71598900  | -0.68757100 | C     | 4.14544300  | -2.46024200 | -0.01824700 |
| F | -1.71794100 | 0.45314500  | -2.15164200 | C     | 4.85752300  | -3.58208700 | 0.40512100  |
| C | -1.27285400 | 1.64685200  | -1.68430700 | H     | 5.63524200  | -3.97758300 | -0.24325800 |
| F | -2.86484500 | 2.56556000  | -3.17274900 | C     | 4.59248100  | -4.21994600 | 1.61424900  |
| C | -1.89006000 | 2.74797300  | -2.27053100 | C     | 3.55794100  | -3.72515500 | 2.40665800  |
| F | -2.07350800 | 5.09325300  | -2.44842900 | H     | 3.31092200  | -4.22929600 | 3.33746100  |
| C | -1.49968100 | 4.02213100  | -1.90535100 | C     | 2.81468400  | -2.60814400 | 2.03336000  |
| F | -0.06067200 | 5.37631000  | -0.63116100 | C     | 4.46457700  | -1.88645200 | -1.37566000 |
| C | -0.48311300 | 4.15935200  | -0.96791600 | H     | 5.06336800  | -2.59947800 | -1.94500000 |
| F | 1.11403800  | 3.25417900  | 0.42255000  | H     | 5.02295500  | -0.94881400 | -1.30471700 |
| C | 0.08987800  | 3.02957000  | -0.40303400 | H     | 3.55085400  | -1.70083300 | -1.94909300 |
| C | 1.97412200  | 0.51857600  | 0.18635800  | C     | 5.40023200  | -5.41009700 | 2.05697600  |
| F | 2.21612000  | 1.99004100  | -1.67500800 | H     | 4.78701400  | -6.11604000 | 2.62148500  |
| C | 2.76284900  | 1.21637900  | -0.72822300 | H     | 6.22197200  | -5.09301600 | 2.70710300  |
| F | 4.83669600  | 1.84231100  | -1.67664500 | H     | 5.83541000  | -5.93385600 | 1.20339100  |
| C | 4.15202100  | 1.14276500  | -0.77243300 | C     | 1.67170800  | -2.16898100 | 2.91279900  |
| F | 6.15591400  | 0.23902900  | 0.08508300  | H     | 0.74579300  | -2.07348800 | 2.33643100  |
| C | 4.82878700  | 0.32764700  | 0.11959900  | H     | 1.86524800  | -1.20297100 | 3.39461500  |
| F | 4.71768600  | -1.21354300 | 1.90147700  | H     | 1.49570400  | -2.90030400 | 3.70274900  |
| C | 4.09662800  | -0.40153500 | 1.04421000  | C     | 3.32204400  | 0.78924700  | -0.23296100 |

|   |             |             |             |        |             |             |             |
|---|-------------|-------------|-------------|--------|-------------|-------------|-------------|
| C | 3.35600900  | 1.27914100  | -1.55229600 | C      | 1.31758400  | 3.49756600  | -1.07293500 |
| C | 4.30235500  | 2.25199100  | -1.87672400 | F      | 1.45698800  | 3.91417900  | -2.33379200 |
| H | 4.31420100  | 2.64162600  | -2.89133900 | C      | 2.16583200  | 3.98824200  | -0.09060600 |
| C | 5.19504000  | 2.76326100  | -0.94038900 | F      | 3.10720100  | 4.88130300  | -0.39454600 |
| C | 5.13530700  | 2.26877000  | 0.36093400  | C      | 2.05872800  | 3.48377200  | 1.19153700  |
| H | 5.80862800  | 2.66979300  | 1.11375100  | F      | 2.92424400  | 3.86546900  | 2.13473900  |
| C | 4.21797600  | 1.29260900  | 0.74223900  | C      | 1.10585100  | 2.50723100  | 1.46962900  |
| C | 2.41493800  | 0.83500600  | -2.63885300 | F      | 1.16175700  | 2.03259900  | 2.73470600  |
| H | 2.72174100  | -0.12049200 | -3.07634300 | C      | -2.46310500 | 1.49795100  | 0.40740600  |
| H | 2.39593200  | 1.57914300  | -3.43717000 | C      | -2.68498000 | 2.86760700  | 0.21980500  |
| H | 1.39505600  | 0.72410600  | -2.27331200 | F      | -1.68795500 | 3.76835500  | 0.28862400  |
| C | 6.14524200  | 3.87044900  | -1.30285600 | C      | -3.92637700 | 3.44834800  | -0.02086500 |
| H | 5.65705200  | 4.83594700  | -1.13781400 | F      | -4.02581500 | 4.76744100  | -0.19494600 |
| H | 6.43615200  | 3.81716500  | -2.35406500 | C      | -5.06073300 | 2.65939400  | -0.06915400 |
| H | 7.04709200  | 3.83965300  | -0.68782300 | F      | -6.25708700 | 3.19548700  | -0.29750000 |
| C | 4.18846600  | 0.88659700  | 2.19742600  | C      | -4.91863400 | 1.30013300  | 0.14524600  |
| H | 4.26030200  | -0.19611600 | 2.33517100  | F      | -5.99101500 | 0.50764700  | 0.13502800  |
| H | 3.27251500  | 1.23904800  | 2.68355800  | C      | -3.65982300 | 0.76513500  | 0.39169900  |
| H | 5.02711600  | 1.34421000  | 2.72335800  | F      | -3.68845800 | -0.55541800 | 0.63475600  |
| C | 0.86471400  | -2.07352100 | -1.53950400 | C      | -4.49113700 | -1.73009100 | 3.78730700  |
| C | 1.27139700  | -3.36525800 | -1.18438300 | C      | -4.46182100 | -0.33852200 | 3.82064300  |
| H | 1.43076400  | -3.61604000 | -0.14205000 | C      | -3.32750600 | 0.34796000  | 3.39903900  |
| C | 1.44035300  | -4.34711700 | -2.15757900 | C      | -2.20399300 | -0.33419400 | 2.91796100  |
| H | 1.75642300  | -5.34201200 | -1.86142000 | C      | -2.23757000 | -1.73099900 | 2.92554100  |
| C | 1.18783500  | -4.06245800 | -3.49547000 | C      | -3.36823100 | -2.42440500 | 3.34531700  |
| H | 1.31907700  | -4.82992200 | -4.25124400 | H      | -5.37710500 | -2.26757100 | 4.10949900  |
| C | 0.73860200  | -2.79387500 | -3.85643300 | H      | -5.32555100 | 0.21521800  | 4.17624300  |
| H | 0.50752900  | -2.56937000 | -4.89251000 | H      | -3.31442000 | 1.43545800  | 3.42074100  |
| C | 0.57635400  | -1.81131500 | -2.88724100 | H      | -1.37603700 | -2.28719800 | 2.57179400  |
| H | 0.19599800  | -0.83199700 | -3.16460200 | H      | -3.37274000 | -3.51032800 | 3.32327200  |
| C | -1.66149700 | -1.24322800 | -0.87684300 | C      | -1.02096900 | 0.43320200  | 2.39559900  |
| C | -1.93877300 | -2.53817200 | -0.44338200 | H      | -0.99852000 | 1.39084600  | 2.92498900  |
| F | -1.15180300 | -3.13002900 | 0.46498200  | H      | -0.10295700 | -0.08499600 | 2.69498100  |
| C | -3.01641600 | -3.26507300 | -0.92146600 | H      | 1.72667200  | 0.01714500  | 1.59849100  |
| F | -3.25905300 | -4.49228600 | -0.46692800 |        |             |             |             |
| C | -3.83499100 | -2.71097300 | -1.89560300 | P25_TS |             |             |             |
| F | -4.86535500 | -3.40071300 | -2.37282900 | C      | -2.59963900 | -1.71979700 | 3.78199400  |
| C | -3.55445200 | -1.44466600 | -2.38797900 | C      | -1.42735200 | -2.34840600 | 4.10324200  |
| F | -4.31329700 | -0.92228400 | -3.34814100 | C      | -0.30336200 | -2.30381700 | 3.24205800  |
| C | -2.47577500 | -0.73279300 | -1.88201800 | C      | -0.31502700 | -1.51295200 | 2.04117100  |
| F | -2.22289000 | 0.46603800  | -2.40946700 | C      | -1.59081300 | -0.92373100 | 1.70958500  |
| C | 0.22409900  | 1.97780100  | 0.53098800  | C      | -2.68175500 | -1.05607600 | 2.54754600  |
| C | 0.39097800  | 2.52305500  | -0.74344600 | H      | 0.78730700  | -3.69666300 | 4.48217100  |
| F | -0.39246700 | 2.09360400  | -1.74423100 | H      | -3.46636200 | -1.77686500 | 4.43125100  |

|   |             |             |             |   |             |             |             |
|---|-------------|-------------|-------------|---|-------------|-------------|-------------|
| H | -1.34601300 | -2.93141000 | 5.01683300  | C | -2.62034500 | 3.71648300  | 0.41829200  |
| C | 0.81751000  | -3.10900300 | 3.56897300  | C | -2.75139900 | 4.11608200  | -0.90722700 |
| C | 0.89804900  | -1.43575500 | 1.24734800  | C | -2.86090400 | 5.57252200  | -1.26621300 |
| H | -3.64426800 | -0.66769700 | 2.22678300  | C | -2.69297300 | 3.13179400  | -1.89036800 |
| C | 1.90568200  | -2.31903500 | 1.59276000  | C | -2.47208400 | 1.79221600  | -1.57832500 |
| C | 1.88283800  | -3.16447200 | 2.72067300  | C | -2.43524700 | 0.80015500  | -2.71782000 |
| H | 2.79872400  | -2.35000800 | 0.97661800  | H | -6.20345900 | 0.77430900  | 0.39565600  |
| H | 2.72936100  | -3.81192000 | 2.92463300  | H | -4.58496500 | 0.97203200  | 1.06507500  |
| P | -1.93359300 | -0.37225100 | 0.00177400  | H | -4.92113800 | 1.51248400  | -0.57143500 |
| B | 1.25835500  | -0.42536300 | 0.00959500  | H | -6.89469700 | -0.94758500 | -0.75749700 |
| C | 2.90230900  | -0.16873500 | -0.19107100 | H | -7.08301400 | -3.41481300 | -2.82709200 |
| C | 3.73852300  | -0.02529500 | 0.92702400  | H | -6.93468000 | -4.53944900 | -1.47603600 |
| F | 3.26064800  | -0.13320300 | 2.17269200  | H | -7.92781300 | -3.08053200 | -1.31326800 |
| C | 5.09755500  | 0.26151400  | 0.86386700  | H | -4.42351300 | -4.34164900 | -1.52102700 |
| F | 5.81763100  | 0.34231700  | 1.98205800  | H | -2.25447400 | -4.40249100 | -0.84740500 |
| C | 5.69850300  | 0.49389700  | -0.36106200 | H | -1.54537300 | -3.11874400 | 0.13212300  |
| F | 6.99524900  | 0.77464700  | -0.44378900 | H | -1.46011200 | -3.05154900 | -1.63765400 |
| C | 4.90703700  | 0.45632700  | -1.49487000 | H | -2.13750000 | 3.06086200  | 2.80489700  |
| C | 3.55156200  | 0.17012600  | -1.38262600 | H | -1.43889900 | 1.46607400  | 2.53522400  |
| F | 2.88888300  | 0.28775900  | -2.55177000 | H | -3.18121300 | 1.64487600  | 2.66469200  |
| F | 5.43561600  | 0.73009400  | -2.68768300 | H | -2.66192800 | 4.47155000  | 1.20093100  |
| C | 0.77472200  | 1.14004600  | 0.13199100  | H | -3.39661700 | 6.13427400  | -0.49746300 |
| C | 0.59666100  | 1.99623800  | -0.95660000 | H | -3.37044300 | 5.71338300  | -2.22201800 |
| F | 0.49587000  | 1.50677500  | -2.20598200 | H | -1.85645700 | 5.99966700  | -1.35413800 |
| C | 0.44688200  | 3.36896900  | -0.84783500 | H | -2.79350700 | 3.41569500  | -2.93512400 |
| F | 0.22493700  | 4.12153300  | -1.92644500 | H | -2.45290100 | 1.32788200  | -3.67282500 |
| C | 0.46640000  | 3.95938800  | 0.40601000  | H | -1.52472300 | 0.19453100  | -2.69827700 |
| F | 0.23385900  | 5.26428000  | 0.53122600  | H | -3.29220800 | 0.11948100  | -2.68802700 |
| C | 0.64778700  | 3.16252300  | 1.52161000  | H | -0.34322900 | -0.87654800 | -0.78740700 |
| C | 0.80365200  | 1.78949500  | 1.36584100  | C | 2.95948200  | -4.99750500 | -1.98998600 |
| F | 0.94126100  | 1.09833300  | 2.50449400  | C | 3.29894100  | -3.87008800 | -2.73121200 |
| F | 0.60463100  | 3.70179500  | 2.74073100  | C | 2.58359100  | -2.68612800 | -2.57787100 |
| C | -3.52662900 | -1.24402000 | -0.41344100 | C | 1.51547300  | -2.59546800 | -1.67652500 |
| C | -4.81265800 | -0.65602800 | -0.36508200 | C | 1.18234100  | -3.74038300 | -0.94441900 |
| C | -5.13882200 | 0.72652900  | 0.15764300  | C | 1.89495300  | -4.92601800 | -1.09771700 |
| C | -5.91050800 | -1.40893600 | -0.79575800 | H | 3.51641700  | -5.92148900 | -2.10759300 |
| C | -5.80201900 | -2.71887200 | -1.24622500 | H | 4.12334400  | -3.90799700 | -3.43639200 |
| C | -7.00395500 | -3.48057500 | -1.73697400 | H | 2.85382100  | -1.82164300 | -3.17369900 |
| C | -4.54001500 | -3.30272900 | -1.22100200 | H | 0.37869900  | -3.70450300 | -0.22099200 |
| C | -3.41323300 | -2.59363800 | -0.81506800 | H | 1.61581400  | -5.79423200 | -0.50878500 |
| C | -2.09688700 | -3.32334700 | -0.79031400 | C | 0.73775900  | -1.29408000 | -1.58852100 |
| C | -2.30472900 | 1.41420000  | -0.22434800 | H | 1.11629300  | -0.55982700 | -2.28764300 |
| C | -2.38768400 | 2.38963600  | 0.79026800  | H | -0.24062300 | -1.52654100 | -2.04245900 |
| C | -2.27263700 | 2.11652200  | 2.27275000  |   |             |             |             |

|       |             |             |             |   |             |             |             |
|-------|-------------|-------------|-------------|---|-------------|-------------|-------------|
| P25_P |             |             |             | C | -6.01120400 | -1.69505100 | -0.31483600 |
| C     | -2.24626200 | -1.82829100 | 3.80823600  | C | -5.83540500 | -2.96148000 | -0.86227200 |
| C     | -1.10723900 | -2.58268000 | 3.90082200  | C | -7.01103500 | -3.85096200 | -1.16587000 |
| C     | -0.11820500 | -2.57370000 | 2.88865800  | C | -4.53375100 | -3.39804400 | -1.09770100 |
| C     | -0.19920500 | -1.67941900 | 1.75838500  | C | -3.42752600 | -2.60624700 | -0.80425300 |
| C     | -1.46783000 | -0.98998400 | 1.65643700  | C | -2.05538700 | -3.15027600 | -1.11612600 |
| C     | -2.44455400 | -1.08989700 | 2.63479000  | C | -2.49552200 | 1.41592100  | -0.13703300 |
| H     | 0.96666200  | -4.16671900 | 3.86130600  | C | -2.54446700 | 2.38208700  | 0.88510500  |
| H     | -3.01019300 | -1.85508200 | 4.57641900  | C | -2.28704700 | 2.11221500  | 2.34901000  |
| H     | -0.95350800 | -3.24132500 | 4.75146600  | C | -2.85323800 | 3.69684400  | 0.52657400  |
| C     | 0.94326900  | -3.50481100 | 3.00058800  | C | -3.07886700 | 4.08036900  | -0.79033300 |
| C     | 0.91863200  | -1.60178300 | 0.84634300  | C | -3.25509900 | 5.52792300  | -1.15376600 |
| H     | -3.41398900 | -0.62346800 | 2.48008100  | C | -3.04494000 | 3.09639800  | -1.77841200 |
| C     | 1.86862100  | -2.60469800 | 0.99160400  | C | -2.75811900 | 1.76751000  | -1.48576400 |
| C     | 1.88679000  | -3.56776300 | 2.01850500  | C | -2.70699400 | 0.77891300  | -2.62861000 |
| H     | 2.71831400  | -2.60145000 | 0.31580900  | H | -6.32717500 | 0.49265700  | 0.91234200  |
| H     | 2.68728300  | -4.29945000 | 2.05428200  | H | -4.66949700 | 0.76776700  | 1.43831800  |
| P     | -2.13265800 | -0.34215100 | 0.11089200  | H | -5.17208500 | 1.29878100  | -0.15812400 |
| B     | 1.38743700  | -0.48451300 | -0.28999000 | H | -7.02006000 | -1.34088700 | -0.11902500 |
| C     | 2.98568000  | -0.05209700 | -0.00642100 | H | -6.88419000 | -4.35410900 | -2.12757000 |
| C     | 3.67060500  | -0.13644100 | 1.21086800  | H | -7.11285900 | -4.62674200 | -0.40048600 |
| F     | 3.11047100  | -0.66008900 | 2.31069000  | H | -7.94276100 | -3.28276800 | -1.19381000 |
| C     | 4.97498100  | 0.31309500  | 1.40134000  | H | -4.37033900 | -4.38569500 | -1.52175700 |
| F     | 5.56593800  | 0.17673200  | 2.59058700  | H | -2.11342300 | -4.22009300 | -1.32395200 |
| C     | 5.65875600  | 0.92203500  | 0.36360100  | H | -1.34188100 | -3.01226800 | -0.29671100 |
| F     | 6.90539100  | 1.36023700  | 0.53362600  | H | -1.63400500 | -2.66972500 | -2.00709800 |
| C     | 5.01334700  | 1.07922500  | -0.85207000 | H | -2.07915600 | 3.05486100  | 2.85774100  |
| C     | 3.71194500  | 0.61807200  | -0.99369500 | H | -1.43736500 | 1.45163400  | 2.52260100  |
| F     | 3.15266700  | 0.88052400  | -2.19281000 | H | -3.16078100 | 1.66301900  | 2.83511500  |
| F     | 5.63466500  | 1.68734800  | -1.86526300 | H | -2.86254900 | 4.45461600  | 1.30602900  |
| C     | 0.72958900  | 1.04504100  | -0.17204500 | H | -3.90173900 | 5.64774600  | -2.02573800 |
| C     | 0.42485700  | 1.89439900  | -1.23628200 | H | -2.27579100 | 5.95205100  | -1.39868200 |
| F     | 0.30389300  | 1.43363800  | -2.49509600 | H | -3.67184500 | 6.10216100  | -0.32387000 |
| C     | 0.16361800  | 3.25358200  | -1.09980900 | H | -3.21072300 | 3.37812800  | -2.81476700 |
| F     | -0.18373600 | 3.99322800  | -2.15719800 | H | -2.94731300 | 1.28655800  | -3.56340400 |
| C     | 0.19984100  | 3.83564600  | 0.15417700  | H | -1.70486700 | 0.35366800  | -2.74423800 |
| F     | -0.13644200 | 5.11690400  | 0.31065500  | H | -3.42091200 | -0.04042000 | -2.49991800 |
| C     | 0.50113500  | 3.04597800  | 1.25218900  | H | -1.21392600 | -0.67313800 | -0.88323100 |
| C     | 0.74977600  | 1.69396800  | 1.06586500  | C | 3.60367900  | -4.68035600 | -2.57688400 |
| F     | 1.02617200  | 0.99825100  | 2.17949800  | C | 4.11253700  | -3.40577800 | -2.81438400 |
| F     | 0.47474700  | 3.57708100  | 2.47832200  | C | 3.32811300  | -2.27976600 | -2.58291800 |
| C     | -3.63313600 | -1.31941000 | -0.25673000 | C | 2.01811600  | -2.39297700 | -2.09788400 |
| C     | -4.94070200 | -0.85405100 | -0.00200400 | C | 1.51910600  | -3.68337700 | -1.88273500 |
| C     | -5.28793200 | 0.49877200  | 0.57928800  | C | 2.29708400  | -4.81366200 | -2.11578500 |

|   |            |             |             |
|---|------------|-------------|-------------|
| H | 4.21500800 | -5.55858300 | -2.75825000 |
| H | 5.12476500 | -3.28595900 | -3.18887800 |
| H | 3.72561700 | -1.29224900 | -2.79570300 |
| H | 0.50689000 | -3.80082300 | -1.50523700 |
| H | 1.88156200 | -5.80074300 | -1.93484900 |
| C | 1.20104600 | -1.16110600 | -1.80873600 |
| H | 1.42662600 | -0.42627700 | -2.57711500 |
| H | 0.14425500 | -1.42887700 | -1.95378600 |
